# Supplementary material for: Transcriptomic and metabolomic analyses reveal the differential accumulation of phenylpropanoids and terpenoids in hemp autotetraploid and its diploid progenitor
Source: BMC Plant Biol. 2023 Dec 5;23:616. doi: 10.1186/s12870-023-04630-z (PMC10696708; doi:10.1186/s12870-023-04630-z)
Supplement: Supplementary file 2 — Additional file 2: Supplementary Table S2. Top 50 differential expressed metabolites (DEMs). [file 12870_2023_4630_MOESM2_ESM.xlsx]

## Sheet: Sheet1
Supplementary Table S2: Top 50 differential expressed metabolites (DEMs) (XLS).
ID	m/z	Retention time (min)	Ion mode	Metabolites	Compound ID	Super Class	Class	Sub Class	kegg	Score	Fragmentation Score	Adducts	Formula	Mass Error (ppm)	VIP	P-value	adj.P-value	log2(FC)	FC	average(Cs4XF)	average(Cs2XF)	Cs4XF1	Cs4XF2	Cs4XF3	Cs4XF4	Cs4XF5	Cs4XF6	Cs4XF7	Cs4XF8	Cs2XF1	Cs2XF2	Cs2XF3	Cs2XF4	Cs2XF5	Cs2XF6	Cs2XF7	Cs2XF8
10.64_375.2177m/z	375.218	10.6357	neg	8-Hydroxy-delta-9-THC	HMDB0060910	Organoheterocyclic compounds	Benzopyrans	1-benzopyrans		56.8	87.4	M+FA-H	C21H30O3	-0.00123149	20.0966	0.00278564	0.013327	0.388789	1.30929	4.83053e+07	3.68941e+07	4.8035e+07	5.0577e+07	4.65395e+07	4.13808e+07	4.21437e+07	5.2866e+07	5.77858e+07	4.71146e+07	3.76032e+07	4.10004e+07	4.02234e+07	3.44439e+07	3.5958e+07	3.53684e+07	3.11675e+07	3.93884e+07
10.34_389.1975m/z	389.197	10.3397	neg	11-nor-9-carboxy-Delta(9)-tetrahydrocannabinol	HMDB0062770	Organoheterocyclic compounds	Benzopyrans	1-benzopyrans		53.9	75.1	M+FA-H	C21H28O4	1.5004	11.3663	0.00214215	0.0113418	0.530141	1.44407	1.32162e+07	9.15202e+06	1.12562e+07	1.56011e+07	1.35281e+07	1.66041e+07	8.96012e+06	1.46062e+07	1.1805e+07	1.33686e+07	1.1266e+07	1.1874e+07	8.60415e+06	1.09504e+07	7.94668e+06	7.2915e+06	6.92992e+06	8.35345e+06
1.27_233.1133m/z	233.113	1.27268	pos	L-N-(3-Carboxypropyl)glutamine	HMDB0029393	Organic acids and derivatives	Carboxylic acids and derivatives	Amino acids, peptides, and analogues		52.2	63.1	M+H	C9H16N2O5	0.274898	13.3516	0.000280392	0.00365487	2.32901	5.0246	6.10753e+06	1.21553e+06	4.9135e+06	1.17976e+07	4.6494e+06	7.06971e+06	3.34059e+06	7.0289e+06	5.35804e+06	4.70248e+06	1.1704e+06	2.59306e+06	135265	1.70728e+06	935633	960554	1.11175e+06	1.11026e+06
0.78_132.0536n	133.061	0.775067	pos	L-Asparagine	14	Organic acids and derivatives	Carboxylic acids and derivatives	Amino acids, peptides, and analogues	C00152	58.8	96.3	M+H, M+Na	C4H8N2O3	1.07672	8.15063	0.00664533	0.0236126	0.403959	1.32313	8.14775e+06	6.15792e+06	7.09748e+06	1.06244e+07	7.56868e+06	7.78892e+06	9.84621e+06	7.8511e+06	7.21311e+06	7.19206e+06	6.43355e+06	6.68357e+06	5.58217e+06	7.11292e+06	5.46338e+06	5.50427e+06	6.13272e+06	6.35077e+06
5.20_432.1061n	431.099	5.20173	neg	1,8-Dihydroxy-3-hydroxymethylanthraquinone 8-O-b-D-glucoside	HMDB0029679	Benzenoids	Anthracenes	Anthraquinones		55.9	84.8	M-H, 2M-H	C21H20O10	0.984482	11.9408	0.000692539	0.00586623	-4.88261	0.0338992	133397	3.9351e+06	138917	93176	182073	98436.7	130955	157713	152337	113568	3.06873e+06	5.25924e+06	396778	4.41772e+06	4.02245e+06	3.47533e+06	6.85341e+06	3.98717e+06
14.47_667.3461m/z	667.346	14.4663	neg	Myrtucommulone A	LMPK13070001	Lipids and lipid-like molecules	Polyketides	Aromatic polyketides		44.6	30.2	M-H	C38H52O10	-3.95861	8.83672	0.0404943	0.0856643	2.33568	5.04791	3.88317e+06	769263	4.06317e+06	1.26263e+06	4.12469e+06	640000	1.15143e+07	2.31937e+06	4.32203e+06	2.81916e+06	91482.8	987722	1.32786e+06	466411	449890	1.32688e+06	841728	662137
0.92_134.0216n	133.014	0.924717	neg	Malic acid	118	Organic acids and derivatives	Hydroxy acids and derivatives	Beta hydroxy acids and derivatives	C00149	57.9	90.2	M-H2O-H, M-H	C4H6O5	0.386506	8.48435	0.00170112	0.00987031	-0.363957	0.777031	7.45523e+06	9.59452e+06	5.35273e+06	7.47056e+06	6.58995e+06	7.8957e+06	7.4408e+06	8.89086e+06	7.46653e+06	8.53473e+06	8.77342e+06	1.04933e+07	1.02082e+07	8.40985e+06	9.26768e+06	1.04739e+07	1.00892e+07	9.0406e+06
0.97_314.1599m/z	314.16	0.9694	pos	Chavicol O-beta-glucopyranoside	HMDB0041617	Organic oxygen compounds	Organooxygen compounds	Carbohydrates and carbohydrate conjugates		43.8	28.8	M+NH4	C15H20O6	0.249939	11.7059	4.29883e-07	0.000370026	2.877	7.34619	3.76058e+06	511909	3.52545e+06	2.78911e+06	3.9532e+06	4.30261e+06	3.43443e+06	4.55859e+06	3.93089e+06	3.5904e+06	606496	354928	431950	556557	528570	534822	562637	519313
5.44_295.0460m/z	295.046	5.44003	neg	1-Salicylate glucuronide	HMDB0010313	Organic oxygen compounds	Organooxygen compounds	Carbohydrates and carbohydrate conjugates		55.9	80.4	M-H2O-H	C13H14O9	0.0510523	11.5513	0.00737178	0.0253777	0.196788	1.14614	3.68274e+07	3.21316e+07	3.93512e+07	3.423e+07	3.79411e+07	2.96003e+07	3.74506e+07	4.00568e+07	3.99631e+07	3.60262e+07	3.21476e+07	3.28828e+07	3.05825e+07	3.11226e+07	3.15723e+07	3.06936e+07	3.51802e+07	3.2871e+07
5.68_549.2351m/z	549.235	5.68178	neg	Crocin 4	HMDB0039122	Lipids and lipid-like molecules	Prenol lipids	Diterpenoids	C00744	48.8	47.4	M+FA-H	C27H36O9	1.8797	8.59745	0.021023	0.0531898	0.811261	1.75475	6.43939e+06	3.6697e+06	5.6646e+06	9.47484e+06	4.81825e+06	5.73632e+06	2.75984e+06	1.02431e+07	7.46756e+06	5.35057e+06	5.59936e+06	4.33937e+06	2.54337e+06	3.915e+06	3.66621e+06	4.00423e+06	1.78543e+06	3.50462e+06
10.65_358.2142n	359.221	10.646	pos	4,5-epoxy-17R-HDHA	LMFA04000078	Lipids and lipid-like molecules	Fatty Acyls	Docosanoids		54.8	78.2	M+H-H2O, M+H	C22H30O4	-0.714925	26.7464	0.0204969	0.0522814	0.397482	1.31721	1.00884e+08	7.65891e+07	9.20061e+07	1.16945e+08	9.57201e+07	8.82856e+07	7.30935e+07	1.2485e+08	1.16055e+08	1.00114e+08	9.36839e+07	8.25302e+07	7.83787e+07	7.19978e+07	7.56602e+07	7.10546e+07	5.71522e+07	8.22548e+07
12.61_329.1762m/z	329.176	12.6052	neg	18-oxo-Resolvin E1	LMFA03140012	Lipids and lipid-like molecules	Fatty Acyls	Eicosanoids		55.6	82.7	M-H2O-H	C20H28O5	1.18148	10.6954	0.00320588	0.0145824	-1.03163	0.489158	3.22407e+06	6.59107e+06	3.29879e+06	2.88724e+06	3.4571e+06	2.3196e+06	3.57186e+06	3.4145e+06	3.79245e+06	3.05105e+06	4.50699e+06	1.11463e+07	5.05191e+06	6.08373e+06	6.97213e+06	6.10104e+06	6.37128e+06	6.49518e+06
7.46_452.2055n	497.204	7.45788	neg	8-Butanoylneosolaniol	HMDB0038560	Lipids and lipid-like molecules	Fatty Acyls	Fatty acid esters		45.6	31.1	M-H, M+FA-H	C23H32O9	1.85697	9.01445	0.000559595	0.00521053	-6.0269	0.0153364	34481.9	2.24837e+06	48913.6	30065.4	43708.2	27425	35273.4	29315.1	35010.7	26143.5	44730.1	3.73433e+06	2.89146e+06	2.032e+06	2.37071e+06	2.50486e+06	2.08272e+06	2.32613e+06
11.72_360.2297n	343.226	11.7223	pos	(4Z,7Z,11E,13Z,16Z,19Z)-10-Hydroperoxydocosahexaenoic acid	HMDB0062277	Lipids and lipid-like molecules	Fatty Acyls	Fatty acids and conjugates		54	75.5	M+H-H2O, M+H	C22H32O4	-1.06678	10.0782	0.0334481	0.0742891	-0.502251	0.706004	9.59999e+06	1.35976e+07	5.21236e+06	1.15925e+07	8.02583e+06	1.21623e+07	4.99115e+06	1.55343e+07	9.72834e+06	9.55315e+06	1.34371e+07	1.71899e+07	1.41206e+07	1.22424e+07	1.34915e+07	1.26659e+07	9.78053e+06	1.58531e+07
6.14_419.1930m/z	419.193	6.1438	neg	6-Epi-7-isocucurbic acid glucoside	HMDB0029782	Lipids and lipid-like molecules	Fatty Acyls	Fatty acyl glycosides		54.4	75.6	M+FA-H	C18H30O8	1.83012	10.8701	0.00072304	0.00599307	0.459482	1.37505	1.26917e+07	9.23003e+06	9.58742e+06	1.36468e+07	1.26319e+07	1.60813e+07	1.26466e+07	1.27279e+07	1.15932e+07	1.26189e+07	9.28111e+06	1.12094e+07	1.04571e+07	1.07286e+07	8.41101e+06	7.87166e+06	6.80926e+06	9.07212e+06
5.48_396.2000n	441.198	5.48003	neg	1-Hexanol arabinosylglucoside	HMDB0031689	Lipids and lipid-like molecules	Fatty Acyls	Fatty acyl glycosides		54	72.5	M-H, M+FA-H	C17H32O10	1.23665	8.92786	2.699e-06	0.000585986	-1.66572	0.315186	872093	2.76691e+06	786001	708693	698931	1.20696e+06	802577	942370	833876	997331	2.79784e+06	3.36966e+06	2.86706e+06	2.99979e+06	2.66971e+06	2.44745e+06	2.26602e+06	2.71777e+06
4.93_431.1927m/z	431.193	4.92765	neg	Corchoionol C 9-glucoside	HMDB0029772	Lipids and lipid-like molecules	Fatty Acyls	Fatty acyl glycosides		56.3	87	M+FA-H	C19H30O8	1.0326	8.06742	0.00185021	0.0103968	-0.81566	0.568149	2.3025e+06	4.05263e+06	2.62614e+06	1.65445e+06	2.29316e+06	2.57914e+06	2.13982e+06	2.5646e+06	2.16222e+06	2.40044e+06	2.37355e+06	4.37296e+06	4.2538e+06	3.79425e+06	4.31507e+06	4.61473e+06	5.10462e+06	3.59206e+06
11.05_371.1864m/z	371.186	11.0502	neg	docebenone	LMFA05000652	Lipids and lipid-like molecules	Fatty Acyls	Fatty alcohols		52.8	67.5	M+FA-H	C21H26O3	-0.0324109	20.0722	0.00447307	0.0181589	0.374022	1.29596	5.35688e+07	4.13352e+07	4.89502e+07	6.37452e+07	6.09252e+07	5.7704e+07	4.49089e+07	4.92344e+07	4.32726e+07	5.98097e+07	4.95074e+07	4.07829e+07	4.32245e+07	3.94824e+07	4.12337e+07	3.96671e+07	3.59471e+07	4.08367e+07
6.20_490.1476n	491.155	6.19717	pos	4',5,6-Trimethylscutellarein 7-glucoside	95003	Phenylpropanoids and polyketides	Flavonoids	Flavonoid glycosides		45.3	27.8	M+H, M+NH4, M+Na, M+K, M+H-H2O	C24H26O11	0.131468	9.33725	2.5629e-05	0.00110872	2.87321	7.32694	2.38678e+06	325754	1.93708e+06	2.68544e+06	2.80825e+06	1.99566e+06	2.27269e+06	2.33512e+06	2.42857e+06	2.63142e+06	1.04224e+06	66372.5	51862.5	415801	293793	275509	182649	277805
5.20_433.1131m/z	433.113	5.20045	pos	Vitexin	LMPK12110194	Lipids and lipid-like molecules	Polyketides	Flavonoids		59.1	96.9	M+H	C21H20O10	0.413618	13.887	0.000368384	0.00419159	-4.72173	0.0378982	197105	5.20089e+06	191861	135770	274344	142180	196773	231031	232563	172313	4.3363e+06	6.84275e+06	670148	6.14641e+06	5.5383e+06	4.83308e+06	8.08513e+06	5.15502e+06
5.32_462.1170n	461.11	5.32028	neg	6-C-Methylkaempferol 3-glucoside	LMPK12111836	Lipids and lipid-like molecules	Polyketides	Flavonoids		47.8	43.4	M-H, 2M-H, M+FA-H	C22H22O11	1.67858	10.1655	5.14545e-05	0.00152868	-2.04649	0.242073	827386	3.41793e+06	853235	543128	1.01302e+06	355678	1.23124e+06	753694	1.11414e+06	754954	1.53716e+06	3.73211e+06	3.5672e+06	2.91353e+06	3.80348e+06	3.59078e+06	4.59436e+06	3.60479e+06
14.83_723.4089m/z	723.409	14.8255	neg	PI(14:1(9Z)/12:0)	LMGP06010077	Lipids and lipid-like molecules	Glycerophospholipids	Glycerophosphoinositols		44.6	30	M-H	C35H65O13P	-0.145964	31.0282	0.0134133	0.0385435	0.542511	1.45651	1.11353e+08	7.64518e+07	1.20824e+08	7.74343e+07	1.06863e+08	6.45245e+07	1.4579e+08	1.28445e+08	1.32419e+08	1.1452e+08	8.76279e+07	6.40782e+07	8.75585e+07	7.26864e+07	5.60299e+07	9.95071e+07	7.17867e+07	7.23398e+07
2.03_164.0475n	182.081	2.02535	pos	2-Hydroxycinnamic acid	HMDB0002641	Phenylpropanoids and polyketides	Cinnamic acids and derivatives	Hydroxycinnamic acids and derivatives	C01772	53.5	69.4	M+H, M+NH4, M+H-H2O	C9H8O3	1.11006	7.85772	0.000655535	0.00568163	-2.13979	0.226913	493526	2.17495e+06	203013	635271	297388	966098	675180	349771	228978	592507	1.53992e+06	1.19313e+06	3.45374e+06	2.49602e+06	2.03145e+06	2.73644e+06	2.28102e+06	1.66792e+06
11.06_372.1936n	373.201	11.061	pos	pyrethrin II	LMPR0102060022	Lipids and lipid-like molecules	Prenol lipids	Isoprenoids	C09894	49.6	51.9	M+H-H2O, M+H	C22H28O5	-0.144498	9.95069	0.00733452	0.0252933	0.412506	1.331	1.3506e+07	1.01473e+07	1.34846e+07	1.81466e+07	1.4538e+07	1.46564e+07	1.08547e+07	1.14628e+07	1.10798e+07	1.38253e+07	1.33912e+07	1.03748e+07	1.26065e+07	9.7325e+06	1.00767e+07	9.05784e+06	7.15534e+06	8.78362e+06
14.06_430.3082n	413.305	14.06	pos	MG(24:6(6Z,9Z,12Z,15Z,18Z,21Z)/0:0/0:0)	HMDB0011590	Lipids and lipid-like molecules	Glycerolipids	Monoradylglycerols		53.6	72.7	M+H-H2O, M+H	C27H42O4	-0.349513	10.0307	0.000538191	0.00510595	0.573617	1.48825	8.26499e+06	5.5535e+06	6.65209e+06	9.95101e+06	8.79216e+06	6.32695e+06	7.62535e+06	9.2379e+06	8.5537e+06	8.98078e+06	5.46561e+06	5.49849e+06	5.55159e+06	5.40031e+06	5.62547e+06	6.33753e+06	5.70233e+06	4.84664e+06
9.75_311.1641m/z	311.164	9.74728	pos	4,4'-Dihydroxy-5,5'-diisopropyl-2,2'-dimethyl-3,6-biphenyldione	HMDB0040760	Lipids and lipid-like molecules	Prenol lipids	Quinone and hydroquinone lipids		55.8	82.4	M+H-H2O	C20H24O4	-0.270967	13.4321	2.30319e-05	0.00106434	2.00472	4.01311	5.83844e+06	1.45484e+06	5.98958e+06	5.61113e+06	7.20178e+06	3.27391e+06	6.56251e+06	6.08378e+06	6.27942e+06	5.70544e+06	2.16318e+06	968783	1.26716e+06	1.55308e+06	1.40868e+06	1.34527e+06	1.3224e+06	1.61019e+06
8.46_264.1362n	247.133	8.46083	pos	Curcolonol	HMDB0033227	Lipids and lipid-like molecules	Prenol lipids	Sesquiterpenoids		56.9	86.5	M+H-H2O, M+Na	C15H20O4	-0.0270286	15.3252	0.000569668	0.00524632	-8.67323	0.00244961	15740.3	6.42563e+06	20201.7	25447.9	16668	20997.9	13588.6	11796.4	8809.79	8412.06	10418	7.19278e+06	1.10634e+07	5.72552e+06	6.91978e+06	7.21131e+06	6.3066e+06	6.97531e+06
8.46_246.1258n	245.119	8.45963	neg	Lacinilene C	HMDB0036455	Lipids and lipid-like molecules	Prenol lipids	Sesquiterpenoids		42.7	16.8	M-H, 2M-H, M+FA-H	C15H18O3	0.801104	13.3252	0.000463072	0.00470632	-8.20522	0.00338832	16279.9	4.80471e+06	17307.1	22490.9	16401.9	23039.8	16132	11471.1	11459.2	11936.9	16955.9	5.5606e+06	7.76227e+06	4.17625e+06	5.14709e+06	5.3001e+06	4.76431e+06	5.71007e+06
6.18_350.1578n	368.192	6.17882	pos	Eremopetasin sulfoxide	88110	Lipids and lipid-like molecules	Prenol lipids	Sesquiterpenoids		36.3	0	M+NH4, M+Na, M+K, M+H-H2O	C19H26O4S	7.37728	9.41983	0.000408907	0.00442265	-1.82827	0.281602	968120	3.43791e+06	396856	978965	484815	2.449e+06	468276	1.04282e+06	752075	1.17217e+06	5.06611e+06	3.70846e+06	2.4933e+06	4.35741e+06	3.36303e+06	3.01736e+06	1.57764e+06	3.91993e+06
11.11_329.1760m/z	329.176	11.11	neg	3b-Hydroxy-6b-angeloyloxy-7(11)-eremophilen-12,8b-olide	HMDB0032895	Lipids and lipid-like molecules	Prenol lipids	Terpene lactones		53.7	72.2	M-H2O-H	C20H28O5	0.472775	21.3443	0.00610551	0.0222717	-0.669072	0.628911	2.41681e+07	3.84285e+07	2.29837e+07	2.30881e+07	2.51976e+07	1.72936e+07	2.62367e+07	2.77015e+07	2.7007e+07	2.38371e+07	2.88567e+07	5.95991e+07	2.88617e+07	3.71077e+07	4.0181e+07	3.51931e+07	3.91558e+07	3.84732e+07
10.59_390.2046n	371.187	10.5945	neg	11,12-Dihydroxy-7,14-dimethoxy-8,11,13-abietatrien-20,6-olide	HMDB0031933	Lipids and lipid-like molecules	Prenol lipids	Terpene lactones		47.9	44.2	M-H2O-H, M-H, 2M-H	C22H30O6	1.03064	14.1763	0.000542563	0.00512736	0.547449	1.4615	1.83945e+07	1.2586e+07	1.62822e+07	2.17201e+07	1.87639e+07	2.36583e+07	1.34803e+07	1.85445e+07	1.59023e+07	1.88043e+07	1.47395e+07	1.31962e+07	1.28649e+07	1.50429e+07	1.16195e+07	1.09904e+07	9.80182e+06	1.24331e+07
12.39_329.1762m/z	329.176	12.3926	neg	Carnosol	44853	Lipids and lipid-like molecules	Prenol lipids	Terpene lactones	C09069	55	79.5	M-H	C20H26O4	1.22461	8.75564	0.00386565	0.0164848	-1.00844	0.497083	2.26248e+06	4.55151e+06	2.40454e+06	2.04425e+06	2.43274e+06	1.45798e+06	2.47596e+06	2.33652e+06	2.80765e+06	2.14019e+06	3.06103e+06	7.62586e+06	3.20212e+06	4.16101e+06	4.89312e+06	4.1172e+06	4.80283e+06	4.54889e+06
10.14_291.1590m/z	291.159	10.1415	pos	Laurenobiolide	HMDB0036771	Lipids and lipid-like molecules	Prenol lipids	Terpene lactones	C09492	55.5	80.5	M+H	C17H22O4	-0.298923	8.56025	0.00119727	0.00798441	-8.08849	0.00367386	7628.07	2.07631e+06	8242.67	8527.79	7906.65	10982.2	7891.24	5412.48	5641.61	6419.93	7125.63	2.13092e+06	3.9133e+06	1.2086e+06	2.24356e+06	2.37017e+06	2.4565e+06	2.28031e+06
5.52_480.2001n	479.193	5.51998	neg	1-alpha-Acevaltrate	HMDB0033653	Organic acids and derivatives	Carboxylic acids and derivatives	Tetracarboxylic acids and derivatives		40.1	3.09	M-H, 2M-H	C24H32O10	1.05228	10.1812	0.00048659	0.00483706	1.71287	3.27812	3.99146e+06	1.21761e+06	4.26495e+06	3.16727e+06	4.75139e+06	2.35024e+06	6.06383e+06	2.98155e+06	4.34599e+06	4.00645e+06	232761	2.08316e+06	1.62326e+06	654610	1.30743e+06	1.52521e+06	1.45151e+06	862906
7.57_242.0940n	243.102	7.57162	pos	Citrubuntin	HMDB0039146	Phenylpropanoids and polyketides	Coumarins and derivatives	Unclassified		52.2	64.2	M+H-H2O, M+H	C15H14O3	-1.12198	24.0951	1.43918e-05	0.000873599	4.45387	21.9154	1.46773e+07	669726	1.35317e+07	1.48733e+07	1.59147e+07	6.683e+06	1.91805e+07	1.61729e+07	1.62269e+07	1.48355e+07	1.3259e+06	298204	492779	772238	574936	689368	485238	719139
6.90_243.1016m/z	243.102	6.89558	pos	(S)-Auraptenol	HMDB0030854	Phenylpropanoids and polyketides	Coumarins and derivatives	Unclassified		54.5	74.7	M+H-H2O	C15H16O4	0.179872	8.9406	0.00012026	0.0023123	1.76215	3.39202	2.89863e+06	854543	2.93003e+06	2.7212e+06	3.12709e+06	1.29149e+06	4.05594e+06	3.0387e+06	3.19052e+06	2.83408e+06	584310	856360	1.13334e+06	750481	819188	883903	798729	1.01004e+06
2.03_314.1599m/z	314.16	2.02535	pos	Cyclocalopin A	HMDB0039810	Organoheterocyclic compounds	Furopyrans	Unclassified		40.1	3.57	M+NH4	C15H20O6	0.167979	10.9218	3.31375e-07	0.000370026	5.83736	57.177	2.8673e+06	50147.8	2.80059e+06	2.15969e+06	2.66847e+06	3.47986e+06	2.5937e+06	3.46601e+06	2.86124e+06	2.90886e+06	143379	7219.87	15273	61593.9	44345.7	44404.5	43377.4	41589.1
7.47_496.1947n	497.202	7.467	pos	(7R*,8R*)-3-Methoxy-3',4,7,9,9'-pentahydroxy-8,4'-oxyneolignan 4-xyloside	94843	Lignans, neolignans and related compounds	Lignan glycosides	Unclassified		45.9	31.6	M+H, M+Na, M+NH4, M+K, M+H-H2O	C24H32O11	0.455771	9.26545	0.00062838	0.00553185	-8.06473	0.00373485	8843.26	2.36777e+06	12258.1	9856.64	8529.97	9827.19	6926.58	8710.04	8331.16	6306.35	12828.6	4.0503e+06	3.11944e+06	2.19404e+06	2.46453e+06	2.4877e+06	2.11007e+06	2.50323e+06
11.90_301.1447m/z	301.145	11.9047	neg	similar to alpha-Zearalenol	HMDB0041824	Phenylpropanoids and polyketides	Macrolides and analogues	Unclassified	C14750	55.2	79.6	M-H2O-H	C18H24O5	0.605733	15.1129	0.00268619	0.0130504	1.09281	2.13289	1.29224e+07	6.05862e+06	1.4218e+07	9.9433e+06	1.54345e+07	6.81402e+06	1.73002e+07	1.1054e+07	1.58306e+07	1.27845e+07	1.03072e+06	9.46235e+06	9.65426e+06	3.58534e+06	6.13691e+06	6.86594e+06	6.25183e+06	5.48156e+06
2.16_285.1073n	268.104	2.16287	pos	arabinofuranosylguanine	HMDB0061067	Nucleosides, nucleotides, and analogues	Purine nucleosides	Unclassified		43.8	22.6	M+H-H2O, M+NH4	C10H15N5O5	-0.00597951	8.77091	0.000896513	0.00684613	-0.365028	0.776454	7.46804e+06	9.61814e+06	7.64367e+06	7.27259e+06	6.73675e+06	7.40255e+06	8.44587e+06	7.70056e+06	7.24573e+06	7.29659e+06	1.22029e+07	9.55227e+06	8.8107e+06	9.2572e+06	9.16086e+06	9.13397e+06	9.24986e+06	9.57733e+06
8.04_244.1098n	245.117	8.03717	pos	5-Hydroxybisphenol A	69604	Unclassified	Unclassified	Unclassified		47.6	40.6	M+H-H2O, M+H	C15H16O3	-0.592912	23.3674	7.39844e-05	0.00181576	2.01676	4.04675	1.79556e+07	4.43704e+06	1.7503e+07	1.67554e+07	2.1721e+07	9.49253e+06	2.31653e+07	1.83427e+07	1.96765e+07	1.69881e+07	7.16761e+06	2.66432e+06	3.70242e+06	4.94777e+06	4.07347e+06	4.11889e+06	3.92555e+06	4.89628e+06
10.64_301.1446m/z	301.145	10.6357	neg	Zearalanone	HMDB0259993	Unclassified	Unclassified	Unclassified		56.5	85.2	M-H2O-H	C18H24O5	0.185278	20.7481	0.00432082	0.0177713	1.46192	2.75474	2.03084e+07	7.37216e+06	2.38241e+07	1.34406e+07	2.37681e+07	9.80244e+06	3.4265e+07	1.43682e+07	2.31062e+07	1.98926e+07	1.21877e+06	1.20134e+07	1.00617e+07	4.75514e+06	7.10998e+06	8.60472e+06	8.45052e+06	6.76301e+06
11.10_330.1829n	331.19	11.1006	pos	Dicyclohexyl phthalate	HMDB0251213	Unclassified	Unclassified	Unclassified		47.8	42.8	M+H-H2O, M+H	C20H26O4	-0.761645	19.338	0.00626549	0.0226672	-0.816301	0.567896	1.52489e+07	2.68516e+07	1.439e+07	1.444e+07	1.59761e+07	1.03651e+07	1.5977e+07	1.68161e+07	1.93401e+07	1.4687e+07	1.94176e+07	4.33649e+07	1.87423e+07	2.75352e+07	2.82931e+07	2.49926e+07	2.45751e+07	2.78919e+07
8.61_248.1413n	249.149	8.61	pos	Artemorin	HMDB0302701	Unclassified	Unclassified	Unclassified		54.3	73.6	M+H-H2O, M+H	C15H20O3	0.212182	15.9862	0.000350927	0.00409128	-8.52558	0.0027136	18512.7	6.82221e+06	27017.5	26565	18955.3	23667.5	16370	12982.7	11958.7	10585.4	16848.7	9.23592e+06	9.6335e+06	6.10818e+06	7.28835e+06	7.6604e+06	6.94457e+06	7.68994e+06
8.04_244.1100n	243.103	8.0446	neg	1,2-Bis(4-hydroxyphenyl)-2-propanol	69606	Unclassified	Unclassified	Unclassified		39.5	0	M-H, 2M-H, M+FA-H	C15H16O3	0.349046	12.2322	7.38679e-05	0.00181576	1.96434	3.90233	5.02018e+06	1.28645e+06	5.2874e+06	4.6373e+06	6.04049e+06	2.58765e+06	6.66201e+06	4.77065e+06	5.48277e+06	4.69314e+06	1.97306e+06	800722	1.13258e+06	1.36225e+06	1.21254e+06	1.18367e+06	1.16172e+06	1.46509e+06
5.34_463.1234m/z	463.123	5.33868	pos	5,3',4'-Trihydroxy-7-methoxy-4-phenylcoumarin 5-O-glucoside	LMPK12100041	Unclassified	Unclassified	Unclassified		54	71.2	M+H	C22H22O11	-0.26477	11.6021	3.30746e-05	0.00123277	-2.06805	0.238482	1.04199e+06	4.36924e+06	1.06958e+06	665844	1.22648e+06	494434	1.35775e+06	1.01378e+06	1.54459e+06	963427	2.04745e+06	4.88218e+06	4.45484e+06	4.2201e+06	4.92574e+06	4.60977e+06	5.55696e+06	4.25691e+06
11.62_399.2177m/z	399.218	11.6167	neg	7alpha-Hydroxy-3,12-dioxochola-1,4-dien-24-oic Acid	LMST04010391	Unclassified	Unclassified	Unclassified		52.2	65.2	M-H	C24H32O5	-0.0962856	10.8388	0.0202706	0.0519025	0.344629	1.26982	2.01173e+07	1.58426e+07	2.30959e+07	1.73587e+07	1.93999e+07	1.55807e+07	2.05749e+07	2.04266e+07	2.61725e+07	1.83294e+07	1.71647e+07	1.96591e+07	1.39417e+07	1.47761e+07	1.64907e+07	1.55376e+07	1.45225e+07	1.46488e+07
0.76_157.0852n	175.119	0.757	pos	V-Pyrro/NO	HMDB0259734	Unclassified	Unclassified	Unclassified		39.6	5.58	M+NH4, M+K, M+H	C6H11N3O2	0.704974	9.28536	0.00306391	0.0141497	0.941816	1.92095	5.99264e+06	3.11963e+06	7.10537e+06	6.31441e+06	5.96128e+06	9.92563e+06	7.31999e+06	3.15681e+06	3.55869e+06	4.59895e+06	4.91312e+06	2.85899e+06	1.90078e+06	4.47436e+06	2.7248e+06	3.06636e+06	2.55627e+06	2.46236e+06
6.17_351.1664m/z	351.166	6.16532	neg	Feruloylagmatine	72156	Unclassified	Unclassified	Unclassified		39	0	M+FA-H	C15H22N4O3	-3.13035	8.90478	0.000657281	0.00569304	-1.48003	0.358481	1.24244e+06	3.46585e+06	495498	1.15855e+06	725499	2.94374e+06	620325	1.31354e+06	1.04014e+06	1.64225e+06	4.74373e+06	3.76935e+06	2.78529e+06	4.00758e+06	3.42732e+06	3.20019e+06	1.80963e+06	3.98369e+06
9.75_310.1577n	309.15	9.74515	neg	2,2-Dimethyl-3-(4-methoxyphenyl)-4-ethyl-2H-1-benzopyran-7-ol	70548	Unclassified	Unclassified	Unclassified		38.8	0	M-H, 2M-H, M+FA-H	C20H22O3	2.69889	8.23801	9.91574e-05	0.0021158	2.31819	4.98706	2.12588e+06	426280	1.92852e+06	1.93976e+06	2.96185e+06	999700	2.674e+06	2.10385e+06	2.34413e+06	2.05526e+06	616870	259992	391910	439487	428177	411431	374740	487630
