# Supplementary material for: Transcriptomic and metabolomic analyses reveal the differential accumulation of phenylpropanoids and terpenoids in hemp autotetraploid and its diploid progenitor
Source: BMC Plant Biol. 2023 Dec 5;23:616. doi: 10.1186/s12870-023-04630-z (PMC10696708; doi:10.1186/s12870-023-04630-z)
Supplement: Supplementary file 3 — Additional file 3: Supplementary Table S3. Differential expressed genes (DEGs). [file 12870_2023_4630_MOESM3_ESM.xlsx]

## Sheet: Sheet1
Supplementary Table S3: Differential expressed genes (DEGs) (XLS).
gene_id	BaseMean_DESeq2	BaseMean_control_Cs2XF	BaseMean_case_Cs4XF	FoldChange	log2FoldChange	p-value	q-value	Regulation	Expression_Cs4XF1	Expression_Cs4XF2	Expression_Cs4XF3	Expression_Cs4XF4	Expression_Cs2XF1	Expression_Cs2XF2	Expression_Cs2XF3	Expression_Cs2XF4	gene_symbol	gene_homologs	gene_Dbxref	description	GO_id	GO_term	pathway	pathway_description
LOC115694676	6202.53	8657.02	3748.04	0.449008	-1.15519	8.85e-05	0.00127493	Down	85.2173	78.2444	61.3441	100.796	259.243	234.277	107.218	152.418	FBA5	At4g26530	GeneID:115694676	fructose-bisphosphate aldolase 5, cytosolic	GO:0009507,GO:0005829,GO:0004332,GO:0006094,GO:0006096	chloroplast|cytosol|fructose-bisphosphate aldolase activity|gluconeogenesis|glycolytic process	ko00010,ko00030,ko00051,ko00710	Glycolysis / Gluconeogenesis|Pentose phosphate pathway|Fructose and mannose metabolism|Carbon fixation in photosynthetic organisms
LOC115694757	1137.09	2273.91	0.263894	0.000131118	-12.8968	6.21e-06	0.000130078	Down	0	0	0.00534571	0	11.4918	0	26.8676	7.54383		At4g27190	GeneID:115694757	disease resistance protein At4g27190-like
LOC115694767	6223.21	3456.02	8990.41	2.61499	1.38681	4.66e-06	0.00010089	Up	335.203	319.483	492.848	235.143	76.2323	185.655	139.612	134.855	ARPN	At2g02850	GeneID:115694767	basic blue protein	GO:0046658,GO:0048046,GO:0031012,GO:0009055,GO:0046872,GO:0048653,GO:0009856	anchored component of plasma membrane|apoplast|extracellular matrix|electron transfer activity|metal ion binding|anther development|pollination
LOC115694842	44.9313	77.9144	11.9483	0.154597	-2.69342	7.52e-10	3.63e-08	Down	0.309815	0.765739	1.05146	0.490305	2.77612	3.80105	4.79266	5.83381			GeneID:115694842	uncharacterized protein LOC115694842
LOC115695037	9.26293	18.5259	0	0.00972389	-6.68425	3.3e-06	7.42e-05	Down	0	0	0	0	0.615149	0.347926	1.10103	0.594357			GeneID:115695037	uncharacterized protein LOC115695037
LOC115695093	11.0813	0	22.1626	114.24	6.83592	2.82e-07	8.46e-06	Up	0.927718	0.982691	0.932896	0.391515	0	0	0	0	FRS5	At4g38180	GeneID:115695093	protein FAR1-RELATED SEQUENCE 1-like	GO:0005634,GO:0008270,GO:0006355	nucleus|zinc ion binding|regulation of transcription, DNA-templated
LOC115695303	39.1564	0	78.3128	409.479	8.67764	7.5e-15	6.7e-13	Up	1.37827	1.58553	1.05624	0.900631	0	0	0	0			GeneID:115695303	uncharacterized protein LOC115695303
LOC115695410	12.8032	25.1152	0.491117	0.025974	-5.26679	0.00126112	0.0113975	Down	0	0	0.0189538	0.015909	0	0.154166	1.40872	0.26336			GeneID:115695410	uncharacterized protein LOC115695410
LOC115695516	76.1545	152.082	0.227224	0.00187294	-9.06048	0.000256346	0.00317416	Down	0	0	0	0.0237202	5.60077	0	6.92855	3.5831		At3g55350	GeneID:115695516	protein ALP1-like	GO:0005634,GO:0046872,GO:0004518	nucleus|metal ion binding|nuclease activity
LOC115695567	66.279	125.274	7.28353	0.0769008	-3.70086	5.49e-05	0.000849186	Down	0.0306223	0.275713	0.0173212	0.145386	0.560462	0.387438	4.07946	3.21902		VIT_19s0014g04930	GeneID:115695567	(-)-germacrene D synthase-like	GO:0005737,GO:0034004,GO:0052577,GO:0000287,GO:0016114	cytoplasm|germacradienol synthase activity|germacrene-D synthase activity|magnesium ion binding|terpenoid biosynthetic process	ko00909	Sesquiterpenoid and triterpenoid biosynthesis
LOC115695580	27.0413	8.55672	45.5258	5.02689	2.32967	7.5e-05	0.0011118	Up	0.393165	0.723329	1.77912	1.10033	0.165694	0.190407	0.112979	0.284611	ufd1		GeneID:115695580	ubiquitin recognition factor in ER-associated degradation protein 1-like	GO:0005829,GO:0000836,GO:0005634,GO:1990112,GO:0034098,GO:0032183,GO:0034067,GO:1990116,GO:0035103,GO:0030433	cytosol|Hrd1p ubiquitin ligase complex|nucleus|RQC complex|VCP-NPL4-UFD1 AAA ATPase complex|SUMO binding|protein localization to Golgi apparatus|ribosome-associated ubiquitin-dependent protein catabolic process|sterol regulatory element binding protein cleavage|ubiquitin-dependent ERAD pathway	ko04141	Protein processing in endoplasmic reticulum
LOC115695604	19.3751	38.7503	0	0.00504117	-7.63203	0.000259377	0.00320549	Down	0	0	0	0	0.278641	0	1.56637	0.412143		At4g27190	GeneID:115695604	disease resistance protein At4g27190-like
LOC115695669	13.388	0.250731	26.5253	79.6711	6.31598	9.98e-06	0.000194997	Up	0.978151	2.83805	0.384891	0.565355	0	0	0.0464391	0			GeneID:115695669	uncharacterized protein LOC115695669 isoform X1
LOC115695676	15.0347	30.0694	0	0.00596529	-7.38919	3.73e-08	1.35e-06	Down	0	0	0	0	2.54009	1.1788	1.05694	2.46123			GeneID:115695676	uncharacterized protein LOC115714791
LOC115695704	1006.91	1590.4	423.418	0.370091	-1.43405	0.00438986	0.0303264	Down	17.5246	13.6907	13.4856	13.4723	16.8598	25.7083	33.8155	143.685			GeneID:115695704	uncharacterized protein LOC115695704
LOC115695715	685.719	1196.61	174.831	0.239224	-2.06356	0.000175583	0.0023098	Down	6.19336	5.7028	8.74658	9.34021	10.789	20.1602	16.6641	159.113			GeneID:115695715
LOC115695722	368.989	502.763	235.215	0.469219	-1.09167	5.51e-05	0.000850758	Down	2.61653	2.25566	3.29319	3.12984	4.43128	4.96377	9.65987	5.33031	BHLH123	At3g20640	GeneID:115695722	transcription factor bHLH123 isoform X1	GO:0005634,GO:0003677,GO:0001228,GO:0003700,GO:0046983	nucleus|DNA binding|DNA-binding transcription activator activity, RNA polymerase II-specific|DNA-binding transcription factor activity|protein dimerization activity
LOC115695742	105.498	161.385	49.6103	0.322833	-1.63114	0.000142324	0.00191143	Down	0.371142	0.489235	0.522499	0.352416	0.575501	1.28066	2.45865	1.40987			GeneID:115695742	epidermal growth factor receptor substrate 15-like isoform X1	GO:0030479,GO:0005938,GO:0005509,GO:0000147,GO:0006897,GO:0006886	actin cortical patch|cell cortex|calcium ion binding|actin cortical patch assembly|endocytosis|intracellular protein transport	ko04144	Endocytosis
LOC115695751	275.021	84.1182	465.924	5.63983	2.49565	2.66e-07	8.03e-06	Up	7.8656	7.44235	14.2971	14.0144	2.17355	3.63404	0.892667	1.21555	MTL2		GeneID:115695751	7-methylxanthosine synthase 1-like isoform X1	GO:0046872,GO:0008168,GO:0009820	metal ion binding|methyltransferase activity|alkaloid metabolic process
LOC115695753	3454.81	5375.92	1533.7	0.293971	-1.76626	0.000163889	0.00216769	Down	25.9205	33.8887	16.0289	51.3712	192.2	58.9041	129.353	65.7963	MTL2		GeneID:115695753	7-methylxanthosine synthase 1-like	GO:0046872,GO:0008168,GO:0009820	metal ion binding|methyltransferase activity|alkaloid metabolic process
LOC115695758	157.241	250.649	63.8325	0.227744	-2.13451	7.75e-05	0.00114022	Down	1.24656	1.51367	0.791094	4.61919	5.8429	6.46956	14.774	5.58567	MYB113	At1g66370	GeneID:115695758	transcription factor MYB113-like	GO:0005634,GO:0003700,GO:0043565,GO:0044212,GO:0030154,GO:0007275,GO:0031540,GO:0006355,GO:0009753	nucleus|DNA-binding transcription factor activity|sequence-specific DNA binding|transcription regulatory region DNA binding|cell differentiation|multicellular organism development|regulation of anthocyanin biosynthetic process|regulation of transcription, DNA-templated|response to jasmonic acid
LOC115695772	801.627	1161.98	441.279	0.378083	-1.40322	0.00108917	0.01011	Down	2.64904	4.60919	6.14808	3.63045	6.44577	21.7263	9.55268	7.68231	BGAL3	At4g36360	GeneID:115695772	beta-galactosidase 5-like	GO:0048046,GO:0005618,GO:0009505,GO:0005773,GO:0004565,GO:0030246,GO:0005975	apoplast|cell wall|plant-type cell wall|vacuole|beta-galactosidase activity|carbohydrate binding|carbohydrate metabolic process
LOC115695882	338.65	642.727	34.5739	0.0522358	-4.25882	8.51e-29	2.21e-26	Down	0.53537	0.391099	0.542999	1.22707	5.4061	17.7302	11.8936	15.8878	BURP17	Os11g0170900	GeneID:115695882	BURP domain-containing protein BNM2A-like isoform X2
LOC115695883	123.291	238.337	8.2461	0.0313951	-4.99332	2.11e-09	9.6e-08	Down	0.109081	0.046218	0.296163	0.310732	0.449202	11.6682	3.62101	6.6871	BURP17	Os11g0170900	GeneID:115695883	BURP domain-containing protein BNM2A-like isoform X3
LOC115695887	50.8681	101.736	0	0.00177182	-9.14056	0.00538213	0.0355169	Down	0	0	0	0	4.949	0	2.17424	3.38102			GeneID:115695887	uncharacterized protein LOC115716478
LOC115695888	24.8928	49.27	0.515683	0.0140448	-6.15382	2.27e-05	0.000398471	Down	0	0.0322057	0.0343954	0	0.0347792	0.839294	4.51519	1.10519			GeneID:115695888	ribosome-inactivating protein cucurmosin-like	GO:0030598,GO:0090729,GO:0006952,GO:0017148	rRNA N-glycosylase activity|toxin activity|defense response|negative regulation of translation
LOC115695890	317.198	444.806	189.59	0.425109	-1.2341	0.00256588	0.0200153	Down	2.31171	3.74956	0.953453	2.62951	4.7516	6.38418	7.25733	4.50671	AAG		GeneID:115695890	nigrin b-like isoform X1	GO:0030246,GO:0030598,GO:0090729,GO:0006952,GO:0007157,GO:0017148,GO:0044533	carbohydrate binding|rRNA N-glycosylase activity|toxin activity|defense response|heterophilic cell-cell adhesion via plasma membrane cell adhesion molecules|negative regulation of translation|positive regulation of apoptotic process in other organism
LOC115695891	15.483	29.0981	1.86791	0.0165272	-5.91901	0.00322678	0.0237719	Down	0.222272	0	0	0	0.0953466	0.0639142	3.21593	0.13648	AAG		GeneID:115695891	agglutinin-1-like	GO:0030246,GO:0030598,GO:0090729,GO:0006952,GO:0007157,GO:0017148,GO:0044533	carbohydrate binding|rRNA N-glycosylase activity|toxin activity|defense response|heterophilic cell-cell adhesion via plasma membrane cell adhesion molecules|negative regulation of translation|positive regulation of apoptotic process in other organism
LOC115695902	379.7	751.41	7.99027	0.0108661	-6.52402	1.14e-32	3.41e-30	Down	0.306957	0.144509	0.115751	0.582939	9.36343	38.8367	18.8448	42.8892			GeneID:115695902	uncharacterized protein LOC115695902
LOC115695905	2005.3	3912.18	98.4304	0.0253493	-5.30191	5.17e-48	2.84e-45	Down	4.11562	2.11369	5.03215	6.07905	74.3271	246.825	141.359	235.003			GeneID:115695905	uncharacterized protein LOC115695905
LOC115695984	49.5461	98.0911	1.00096	0.0250086	-5.32143	1.94e-05	0.000346853	Down	0.012879	0.0272843	0.0145697	0	0.220984	0.0888802	0.239076	4.83335	HSP70		GeneID:115695984	heat shock 70 kDa protein-like	GO:0005737,GO:0005524,GO:0016887,GO:0042623,GO:0031072,GO:0051787,GO:0044183,GO:0051082,GO:0034605,GO:0034620,GO:0051085,GO:0042026,GO:0006986	cytoplasm|ATP binding|ATPase activity|ATPase activity, coupled|heat shock protein binding|misfolded protein binding|protein binding involved in protein folding|unfolded protein binding|cellular response to heat|cellular response to unfolded protein|chaperone cofactor-dependent protein refolding|protein refolding|response to unfolded protein	ko03040,ko04141,ko04144	Spliceosome|Protein processing in endoplasmic reticulum|Endocytosis
LOC115695989	117.221	63.9152	170.526	2.74974	1.4593	0.000676349	0.00688935	Up	3.9946	2.85838	3.50944	4.98342	2.52777	0.879812	1.02088	1.29422			GeneID:115695989	LOW QUALITY PROTEIN: protein PELPK1-like
LOC115696221	445.446	890.659	0.233489	0.000313821	-11.6378	0.000329543	0.0039043	Down	0.0346606	0	0	0	0	1.47506	131.294	1.63448	HSP17.3-B		GeneID:115696221	17.3 kDa class I heat shock protein-like	GO:0005737,GO:0043621,GO:0051082,GO:0051259,GO:0006457,GO:0009408,GO:0042542,GO:0000302,GO:0009651	cytoplasm|protein self-association|unfolded protein binding|protein complex oligomerization|protein folding|response to heat|response to hydrogen peroxide|response to reactive oxygen species|response to salt stress	ko04141	Protein processing in endoplasmic reticulum
LOC115696224	485.675	656.578	314.771	0.482743	-1.05067	9.55e-06	0.000188702	Down	9.22663	7.12427	8.48765	7.58526	14.665	24.4924	17.2072	11.7839		At2g34460	GeneID:115696224	uncharacterized protein At2g34460, chloroplastic	GO:0009507,GO:0009941,GO:0009534,GO:0009535,GO:0005622,GO:0010287	chloroplast|chloroplast envelope|chloroplast thylakoid|chloroplast thylakoid membrane|intracellular|plastoglobule
LOC115696233	39.5748	71.3679	7.78175	0.0989685	-3.33689	8.84e-12	5.69e-10	Down	0.434055	0.162274	0.202192	0.0484887	2.42417	2.37877	1.868	1.07862	EIF4A3A	Os01g0639100	GeneID:115696233	eukaryotic initiation factor 4A-3	GO:0005737,GO:0005634,GO:0005524,GO:0004386,GO:0003723,GO:0006397,GO:0051028,GO:0000184,GO:0006417,GO:0008380	cytoplasm|nucleus|ATP binding|helicase activity|RNA binding|mRNA processing|mRNA transport|nuclear-transcribed mRNA catabolic process, nonsense-mediated decay|regulation of translation|RNA splicing	ko03013,ko03015,ko03040	RNA transport|mRNA surveillance pathway|Spliceosome
LOC115696248	168.908	272.654	65.1626	0.243048	-2.04068	0.000233292	0.00293026	Down	1.48545	1.26752	1.37704	1.56723	1.72281	7.6648	11.7824	3.1214			GeneID:115696248	cell wall integrity and stress response component 1-like
LOC115696309	38.665	9.75361	67.5764	6.97527	2.80225	6.11e-05	0.000929966	Up	0.615	0.434295	0.907482	0.600896	0.152935	0.0717622	0.00973266	0.131347	XA21	LOC_Os11g36180	GeneID:115696309	probable LRR receptor-like serine/threonine-protein kinase At3g47570	GO:0032541,GO:0005789,GO:0016021,GO:0005634,GO:1990578,GO:0005886,GO:0005524,GO:0004674,GO:0006952	cortical endoplasmic reticulum|endoplasmic reticulum membrane|integral component of membrane|nucleus|perinuclear endoplasmic reticulum membrane|plasma membrane|ATP binding|protein serine/threonine kinase activity|defense response
LOC115696333	28.144	0.501462	55.7865	107.523	6.7485	3.01e-10	1.56e-08	Up	0.478077	0.759609	0.901397	0.996179	0	0	0.0290022	0	FRS5	At4g38180	GeneID:115696333	protein FAR1-RELATED SEQUENCE 5-like	GO:0005634,GO:0008270,GO:0006355	nucleus|zinc ion binding|regulation of transcription, DNA-templated
LOC115696345	21.5635	42.8998	0.227224	0.0095225	-6.71444	0.000232574	0.00292507	Down	0	0	0	0.0532984	0.321039	0	7.72281	2.37121	RRP4	At1g03360	GeneID:115696345	exosome complex component RRP4 homolog	GO:0005737,GO:0000177,GO:0000178,GO:0000176,GO:0005730,GO:0005654,GO:0003723,GO:0071034,GO:0043928,GO:0000467,GO:0000460,GO:0060149,GO:0071035,GO:0071038,GO:0071049,GO:0034427,GO:0071051,GO:0034475	cytoplasm|cytoplasmic exosome (RNase complex)|exosome (RNase complex)|nuclear exosome (RNase complex)|nucleolus|nucleoplasm|RNA binding|CUT catabolic process|exonucleolytic nuclear-transcribed mRNA catabolic process involved in deadenylation-dependent decay|exonucleolytic trimming to generate mature 3'-end of 5.8S rRNA from tricistronic rRNA transcript (SSU-rRNA, 5.8S rRNA, LSU-rRNA)|maturation o…	ko03018	RNA degradation
LOC115696359	41.1651	19.3936	62.9366	3.28477	1.71579	4.66e-05	0.000729789	Up	2.02366	3.51182	2.82512	3.1072	1.28057	0.792377	0.658224	0.803704	ALF4	At5g11030	GeneID:115696359	aberrant root formation protein 4-like	GO:0005737,GO:0005634,GO:0055105,GO:0007275	cytoplasm|nucleus|ubiquitin-protein transferase inhibitor activity|multicellular organism development
LOC115696428	195.795	287.954	103.635	0.360412	-1.47228	3.2e-05	0.000532762	Down	2.2267	0.956209	1.53184	1.90006	3.39043	6.66244	4.81364	3.68046		At2g40280	GeneID:115696428	probable methyltransferase PMT23	GO:0005768,GO:0005794,GO:0000139,GO:0016021,GO:0005802,GO:0008757,GO:0052546	endosome|Golgi apparatus|Golgi membrane|integral component of membrane|trans-Golgi network|S-adenosylmethionine-dependent methyltransferase activity|cell wall pectin metabolic process
LOC115696581	1230.78	792.52	1669.04	2.03126	1.02238	0.00130959	0.0117526	Up	38.0205	45.3498	23.9666	17.8328	22.2111	10.5158	10.3695	16.1398	GA2OX1		GeneID:115696581	gibberellin 2-beta-dioxygenase	GO:0045543,GO:0046872,GO:0009686	gibberellin 2-beta-dioxygenase activity|metal ion binding|gibberellin biosynthetic process	ko00904	Diterpenoid biosynthesis
LOC115696674	52.9076	89.0353	16.7799	0.185192	-2.4329	6.4e-06	0.000133664	Down	0.594835	0.484679	0.15529	0.391031	2.77407	2.15779	0.999284	2.69716		Os03g0733400	GeneID:115696674	zinc finger BED domain-containing protein RICESLEEPER 1-like	GO:0005634,GO:0003677,GO:0046872,GO:0046983,GO:0009791	nucleus|DNA binding|metal ion binding|protein dimerization activity|post-embryonic development
LOC115696803	5.60397	11.2079	0	0.0166924	-5.90467	0.000131336	0.00179014	Down	0	0	0	0	0.275814	0.508442	0.351053	0.789604			GeneID:115696803	uncharacterized protein LOC115696803
LOC115696808	16.5339	32.816	0.25179	0.00894992	-6.80391	0.00764015	0.0461557	Down	0	0.0730636	0	0	0	7.06093	0	2.71058			GeneID:115696808	uncharacterized protein LOC115696808
LOC115696828	8.07402	15.6202	0.527787	0.0316439	-4.98193	0.00248895	0.0195342	Down	0	0	0.0754961	0	0.381692	0.882723	0.9109	0.0655628	LSH10	At2g42610	GeneID:115696828	protein LIGHT-DEPENDENT SHORT HYPOCOTYLS 10-like	GO:0005634,GO:0003677,GO:0009299,GO:0007275,GO:0090698,GO:0009416	nucleus|DNA binding|mRNA transcription|multicellular organism development|post-embryonic plant morphogenesis|response to light stimulus
LOC115696861	67.1207	94.1325	40.1089	0.416773	-1.26267	9.61e-05	0.00137059	Down	0.487993	0.627676	0.985814	0.860546	1.49522	2.12488	1.42732	1.95193	ZIP1	At3g12750	GeneID:115696861	zinc transporter 8-like	GO:0016021,GO:0005886,GO:0005385,GO:0071577	integral component of membrane|plasma membrane|zinc ion transmembrane transporter activity|zinc ion transmembrane transport
LOC115696869	135.871	66.9588	204.784	2.9253	1.54859	0.00176695	0.0149293	Up	2.77408	4.63624	2.2177	1.07706	0.761585	0.893406	0.551983	1.30817	LAC7	At3g09220	GeneID:115696869	laccase-7-like	GO:0048046,GO:0005507,GO:0052716,GO:0016722,GO:0046274	apoplast|copper ion binding|hydroquinone:oxygen oxidoreductase activity|oxidoreductase activity, oxidizing metal ions|lignin catabolic process
LOC115696872	1516.74	2280.11	753.377	0.331617	-1.59241	3.3e-07	9.69e-06	Down	28.8988	42.5792	37.0211	35.1343	136.04	64.7183	154.488	81.1049			GeneID:115696872	non-specific lipid-transfer protein 1-like	GO:0008289,GO:0006869	lipid binding|lipid transport
LOC115696874	105.58	166.522	44.6382	0.270404	-1.88681	0.000599777	0.00628964	Down	0.978513	0.174831	0.466795	0.615696	1.41601	1.54584	3.38571	2.06163	LECRK41	At2g37710	GeneID:115696874	L-type lectin-domain containing receptor kinase IV.1
LOC115696882	77.7634	127.143	28.3842	0.231375	-2.11169	0.00265877	0.0205811	Down	0.247288	0.18222	0.644644	0.224601	0.221379	2.5846	1.25622	1.82736	DUR3	At5g45380	GeneID:115696882	urea-proton symporter DUR3	GO:0016021,GO:0005886,GO:0015293,GO:0015204,GO:0006995,GO:0071918	integral component of membrane|plasma membrane|symporter activity|urea transmembrane transporter activity|cellular response to nitrogen starvation|urea transmembrane transport
LOC115696886	221.802	312.819	130.785	0.421288	-1.24712	0.000158568	0.00210021	Down	4.45233	2.50733	3.18787	5.45853	10.0894	11.02	10.0928	6.36739	ZIP8	At5g45105	GeneID:115696886	fe(2+) transport protein 1-like	GO:0016021,GO:0005886,GO:0005385	integral component of membrane|plasma membrane|zinc ion transmembrane transporter activity
LOC115696893	91.6018	144.02	39.1832	0.307744	-1.7002	0.00236931	0.0188027	Down	0.819112	0.755177	0.411842	0.532925	1.19726	1.70981	1.22571	5.18599	DALL4	At1g06800	GeneID:115696893	phospholipase A1-Igamma1, chloroplastic	GO:0009507,GO:0047714,GO:0008970,GO:0004620,GO:0004806,GO:0016042	chloroplast|galactolipase activity|phospholipase A1 activity|phospholipase activity|triglyceride lipase activity|lipid catabolic process
LOC115696914	35.7208	53.7177	17.724	0.329168	-1.6031	0.0072185	0.0442064	Down	0.27584	0.320012	0.178315	0.212032	0.781321	0.241729	1.24785	0.735555		At3g11710	GeneID:115696914	lysine--tRNA ligase, cytoplasmic-like isoform X1	GO:0005829,GO:0009506,GO:0005524,GO:0003677,GO:0004824,GO:0046872,GO:0006430	cytosol|plasmodesma|ATP binding|DNA binding|lysine-tRNA ligase activity|metal ion binding|lysyl-tRNA aminoacylation	ko00970	Aminoacyl-tRNA biosynthesis
LOC115696921	64.6038	97.8654	31.3422	0.312944	-1.67602	0.00484301	0.03275	Down	0.48984	0.315026	0.6531	0.863803	1.10065	1.16707	4.18356	0.910909	SETH3	At3g54690	GeneID:115696921	probable arabinose 5-phosphate isomerase	GO:0019146,GO:0005524,GO:1901135,GO:0005975	arabinose-5-phosphate isomerase activity|ATP binding|carbohydrate derivative metabolic process|carbohydrate metabolic process
LOC115696937	45.6717	67.5872	23.7563	0.347075	-1.52668	0.00608248	0.039016	Down	1.12647	0.581312	0.490135	0.713088	1.15641	2.29232	3.75325	1.19181			GeneID:115696937	uncharacterized protein LOC115696937
LOC115696962	1263.37	428.106	2098.63	4.42761	2.14653	0.00019545	0.0025311	Up	32.0452	62.7348	21.8562	8.42487	8.95906	5.36944	2.01139	9.08966	LAC7	At3g09220	GeneID:115696962	laccase-7-like	GO:0048046,GO:0005507,GO:0052716,GO:0016722,GO:0046274	apoplast|copper ion binding|hydroquinone:oxygen oxidoreductase activity|oxidoreductase activity, oxidizing metal ions|lignin catabolic process
LOC115696976	169.106	299.852	38.3591	0.194425	-2.36272	0.000803073	0.00792142	Down	2.30727	1.65842	1.49152	1.25192	4.38311	2.32209	8.63809	37.3607			GeneID:115696976	protein TIFY 5A
LOC115696978	29.5445	52.5536	6.53548	0.120519	-3.05266	0.00646162	0.0408074	Down	0.222512	0.181306	0.0387267	0.0325054	0.0783176	0.255933	2.59795	0.958492	CYP716A44		GeneID:115696978	beta-amyrin 28-monooxygenase-like	GO:0016021,GO:0020037,GO:0005506,GO:0004497,GO:0016709,GO:0016132,GO:0010268,GO:0007275,GO:0055114,GO:0016135,GO:0016125	integral component of membrane|heme binding|iron ion binding|monooxygenase activity|oxidoreductase activity,acting on paired donors, with incorporation or reduction of molecular oxygen, NAD(P)H as one donor, and incorporation of one atom of oxygen|brassinosteroid biosynthetic process|brassinosteroid homeostasis|multicellular organism development|oxidation-reduction process|saponin biosynthetic pr…
LOC115696989	151.964	252.56	51.3667	0.194937	-2.35892	2.78e-05	0.000470582	Down	2.4703	1.14664	1.6328	0.817028	2.38128	9.76908	12.7296	5.34465	HD3A	Os06g0157700	GeneID:115696989	protein HEADING DATE 3A-like	GO:0005737,GO:0005634,GO:0008429,GO:0030154,GO:0009908,GO:0010229,GO:0009909,GO:0048510,GO:0048572,GO:0048575	cytoplasm|nucleus|phosphatidylethanolamine binding|cell differentiation|flower development|inflorescence development|regulation of flower development|regulation of timing of transition from vegetative to reproductive phase|short-day photoperiodism|short-day photoperiodism, flowering	ko04712	Circadian rhythm - plant
LOC115696997	18.4059	29.4506	7.36128	0.205343	-2.28389	0.00172525	0.0146349	Down	0.0177861	0.07536	0.241452	0.219552	0.244146	0.797841	0.524384	0.681471	SD25	At4g32300	GeneID:115696997	G-type lectin S-receptor-like serine/threonine-protein kinase SD2-5 isoform X1
LOC115696999	19.1441	37.5573	0.730871	0.0177212	-5.81838	0.00633887	0.040244	Down	0.0306561	0	0.0173403	0	0.0175338	0	2.42695	0.0602352	NPF55	At2g38100	GeneID:115696999	protein NRT1/ PTR FAMILY 5.5-like isoform X1	GO:0016021,GO:0035673,GO:1904680,GO:0015333	integral component of membrane|oligopeptide transmembrane transporter activity|peptide transmembrane transporter activity|peptide:proton symporter activity
LOC115697000	110.58	221.159	0	0.00109584	-9.83374	0.00366102	0.0262841	Down	0	0	0	0	0	0	13.6058	1.311	NPF55	At2g38100	GeneID:115697000	protein NRT1/ PTR FAMILY 5.5-like	GO:0016021,GO:0035673,GO:1904680,GO:0015333	integral component of membrane|oligopeptide transmembrane transporter activity|peptide transmembrane transporter activity|peptide:proton symporter activity
LOC115697003	38.3929	62.6545	14.1314	0.227196	-2.13799	0.000609838	0.00637211	Down	0.847965	0.359285	0.527607	0.80518	1.50348	4.97417	3.65747	1.29126			GeneID:115697003	probable dynein light chain isoform X1	GO:0005930,GO:0097014,GO:0030286,GO:0005874,GO:0031514,GO:0003774,GO:0007017,GO:0044458	axoneme|ciliary plasm|dynein complex|microtubule|motile cilium|motor activity|microtubule-based process|motile cilium assembly
LOC115697012	5.56994	10.9127	0.227224	0.0266738	-5.22843	0.00289968	0.0219377	Down	0	0	0	0.00917081	0.0110479	0.26661	0.0632776	0.113861	RPS5	At1g12220	GeneID:115697012	disease resistance protein RPS5-like
LOC115697017	207.201	389.779	24.6232	0.0640276	-3.96516	0.00708608	0.043688	Down	1.7255	1.27518	0.544752	0.647756	1.28527	0.553861	64.5441	1.61635			GeneID:115697017	class I heat shock protein-like	GO:0005737,GO:0043621,GO:0051082,GO:0051259,GO:0006457,GO:0009408,GO:0042542,GO:0000302,GO:0009651	cytoplasm|protein self-association|unfolded protein binding|protein complex oligomerization|protein folding|response to heat|response to hydrogen peroxide|response to reactive oxygen species|response to salt stress	ko04141	Protein processing in endoplasmic reticulum
LOC115697019	82.8915	15.8012	149.982	8.0691	3.01241	0.000769404	0.00763465	Up	1.34895	6.49349	1.50908	0.156553	0.39434	0.0861978	0.360066	0.161976	CBDAS2		GeneID:115697019	cannabidiolic acid synthase-like 1	GO:0005576,GO:0071949,GO:0016491	extracellular region|FAD binding|oxidoreductase activity
LOC115697023	132.174	203.12	61.2275	0.302632	-1.72436	6.27e-05	0.000950576	Down	1.90772	4.46448	1.55588	3.53867	8.52597	13.7268	8.96238	7.27889			GeneID:115697023	putative lipid-transfer protein DIR1
LOC115697029	202.498	301.709	103.287	0.343224	-1.54278	0.00192051	0.015953	Down	0.543857	0.610998	1.16525	1.28322	0.961456	1.72498	6.25362	1.78101	GCP3	At5g06680	GeneID:115697029	gamma-tubulin complex component 5-like	GO:0005938,GO:0005813,GO:0055028,GO:0005737,GO:0009898,GO:0000923,GO:0000930,GO:0008275,GO:0005874,GO:0005635,GO:0005819,GO:0000922,GO:0005816,GO:0043015,GO:0005200,GO:0015631,GO:0031122,GO:0051321,GO:0007020,GO:0051415,GO:0090307,GO:0090063,GO:0009624	cell cortex|centrosome|cortical microtubule|cytoplasm|cytoplasmic side of plasma membrane|equatorial microtubule organizing center|gamma-tubulin complex|gamma-tubulin small complex|microtubule|nuclear envelope|spindle|spindle pole|spindle pole body|gamma-tubulin binding|structural constituent of cytoskeleton|tubulin binding|cytoplasmic microtubule organization|meiotic cell cycle|microtubule nucle…
LOC115697038	441.699	883.145	0.25179	0.000628088	-10.6367	0.00153899	0.0134225	Down	0	0.0139665	0	0	0	0	46.3317	4.28763		At3g47200	GeneID:115697038	UPF0481 protein At3g47200-like isoform X1	GO:0016021,GO:0005886	integral component of membrane|plasma membrane
LOC115697049	112.797	184.164	41.4288	0.247208	-2.0162	0.00172812	0.0146528	Down	0.992308	0.773457	0.741324	0.782237	0.621094	3.01489	8.34136	2.92463	DBR		GeneID:115697049	2-alkenal reductase (NADP(+)-dependent)-like	GO:0016491	oxidoreductase activity
LOC115697092	7.18404	13.3979	0.970131	0.0711838	-3.81231	0.00624259	0.0398403	Down	0	0.0175248	0.0187164	0.0314193	0.0567756	0.30447	0.0180658	0.568883	SNL5	At1g59890	GeneID:115697092	paired amphipathic helix protein Sin3-like 1	GO:0000785,GO:0005634,GO:0003714,GO:0016575,GO:0000122	chromatin|nucleus|transcription corepressor activity|histone deacetylation|negative regulation of transcription by RNA polymerase II
LOC115697122	112.109	223.722	0.497382	0.00207535	-8.91243	0.000406302	0.00461717	Down	0.0496037	0	0.0561156	0	0	37.3133	0.216661	10.4287			GeneID:115697122	non-specific lipid-transfer protein 1-like	GO:0008289,GO:0006869	lipid binding|lipid transport
LOC115697143	10.2853	19.3727	1.19785	0.0569191	-4.13494	0.00546095	0.0359416	Down	0.0688051	0	0.0194594	0	0.0196766	0.336342	0.48836	0.591468		At4g19900	GeneID:115697143	uncharacterized protein At4g19900			ko00601,ko00603	Glycosphingolipid biosynthesis - lacto and neolacto series|Glycosphingolipid biosynthesis - globo and isoglobo series
LOC115697159	252.698	376.557	128.839	0.389774	-1.35929	0.000252422	0.00313366	Down	2.40849	1.89705	2.18323	1.94978	2.29589	4.86566	6.91209	10.845	RAS1	At1g09950	GeneID:115697159	protein DOG1-like 4
LOC115697190	75.7919	125.705	25.8786	0.218603	-2.19362	0.00481379	0.0326068	Down	0.217892	0.148905	0.190836	0.213572	0.361809	0.307209	2.80909	0.338359	RE1	At1g59265	GeneID:115697190	Cysteine-rich RLK (receptor-like protein kinase) 8	GO:0000943,GO:0004190,GO:0004519,GO:0046872,GO:0003676,GO:0003964,GO:0015074,GO:0006310	retrotransposon nucleocapsid|aspartic-type endopeptidase activity|endonuclease activity|metal ion binding|nucleic acid binding|RNA-directed DNA polymerase activity|DNA integration|DNA recombination
LOC115697476	260.065	403.917	116.213	0.304013	-1.71779	0.00128108	0.0115508	Down	1.42946	1.70954	2.64303	1.79519	1.16044	8.52135	11.2788	5.8439		At5g24760	GeneID:115697476	alcohol dehydrogenase-like 6	GO:0005737,GO:0004022,GO:0008270	cytoplasm|alcohol dehydrogenase (NAD) activity|zinc ion binding	ko00010,ko00071,ko00350	Glycolysis / Gluconeogenesis|Fatty acid degradation|Tyrosine metabolism
LOC115697485	3719.33	6139.85	1298.81	0.218111	-2.19687	7.52e-06	0.000153575	Down	21.7319	31.3188	36.444	30.9427	35.9494	164.551	296.546	83.4226	AGP31	At1g28290	GeneID:115697485	non-classical arabinogalactan protein 31-like	GO:0005576,GO:0009505,GO:0005886,GO:0009506,GO:0009753	extracellular region|plant-type cell wall|plasma membrane|plasmodesma|response to jasmonic acid
LOC115697541	393.797	537.166	250.427	0.46117	-1.11663	0.00300626	0.0224913	Down	1.80469	2.6313	4.62363	2.22772	4.18948	9.53621	5.42506	5.2668	SBT56	At5g45650	GeneID:115697541	subtilisin-like protease SBT5.6 isoform X1	GO:0005576,GO:0004252	extracellular region|serine-type endopeptidase activity
LOC115697561	76.0645	117.036	35.0927	0.306011	-1.70835	0.00197368	0.016275	Down	0.941576	0.447799	0.499985	0.967053	0.923203	4.00046	1.5947	3.13379	SRG1	At1g17020	GeneID:115697561	protein SRG1-like	GO:0051213,GO:0046872,GO:0016682,GO:0010150	dioxygenase activity|metal ion binding|oxidoreductase activity, acting on diphenols and related substances as donors, oxygen as acceptor|leaf senescence
LOC115697580	4.13017	8.26035	0	0.0219337	-5.51071	0.000890482	0.00857658	Down	0	0	0	0	0.248356	0.392422	0.270947	0.182828	ALT4	At1g68280	GeneID:115697580	acyl-acyl carrier protein thioesterase ATL4, chloroplastic-like	GO:0009507,GO:0016297,GO:0047381,GO:0006629	chloroplast|acyl-[acyl-carrier-protein] hydrolase activity|dodecanoyl-[acyl-carrier-protein] hydrolase activity|lipid metabolic process
LOC115697596	83.7968	167.594	0	0.00111276	-9.81165	0.0036725	0.0263279	Down	0	0	0	0	2.08605	0	6.65476	2.45004	ERD4	At1g30360	GeneID:115697596	CSC1-like protein ERD4 isoform X1	GO:0009507,GO:0009941,GO:0016021,GO:0016020,GO:0005886,GO:0009506,GO:0005774,GO:0005773,GO:0005227	chloroplast|chloroplast envelope|integral component of membrane|membrane|plasma membrane|plasmodesma|vacuolar membrane|vacuole|calcium activated cation channel activity
LOC115697599	5.1646	10.3292	0	0.0176179	-5.82681	0.00142108	0.0125743	Down	0	0	0	0	0.590506	1.78127	0.161055	0.724504			GeneID:115697599	uncharacterized protein LOC115696803
LOC115697717	1076.1	1564.94	587.26	0.373531	-1.4207	1.17e-05	0.000223918	Down	15.8942	10.0477	8.69176	10.7185	18.2231	31.3487	47.6143	25.0771	psi1		GeneID:115697717	dnaJ protein homolog 1-like	GO:0005829,GO:0005634,GO:0051087,GO:0030544,GO:0051082,GO:0051085,GO:0002183,GO:0006413	cytosol|nucleus|chaperone binding|Hsp70 protein binding|unfolded protein binding|chaperone cofactor-dependent protein refolding|cytoplasmic translational initiation|translational initiation
LOC115697736	344.908	474.924	214.892	0.455216	-1.13538	0.0049181	0.0331231	Down	10.776	3.82805	7.32182	8.04856	9.54565	24.4111	12.9149	19.9469	HD3A	Os06g0157700	GeneID:115697736	protein HEADING DATE 3A-like	GO:0005737,GO:0005634,GO:0008429,GO:0030154,GO:0009908,GO:0010229,GO:0009909,GO:0048510,GO:0048572,GO:0048575	cytoplasm|nucleus|phosphatidylethanolamine binding|cell differentiation|flower development|inflorescence development|regulation of flower development|regulation of timing of transition from vegetative to reproductive phase|short-day photoperiodism|short-day photoperiodism, flowering	ko04712	Circadian rhythm - plant
LOC115697741	87.6592	129.559	45.7593	0.328487	-1.60609	0.000873756	0.00845364	Down	0.862471	1.5074	3.70764	2.29307	3.45304	6.89448	9.32365	4.32133			GeneID:115697741	uncharacterized protein LOC115697741
LOC115697753	199.337	371.092	27.5826	0.0594362	-4.07251	0.00536923	0.0354472	Down	0.0377515	0.699799	0.469782	0.985784	0.626167	23.7299	0.144281	5.74868	ACPD		GeneID:115697753	stearoyl-	GO:0009570,GO:0045300,GO:0046872,GO:0102786,GO:0004768,GO:0006952,GO:0006633,GO:0006631	chloroplast stroma|acyl-[acyl-carrier-protein] desaturase activity|metal ion binding|stearoyl-[acp] desaturase activity|stearoyl-CoA 9-desaturase activity|defense response|fatty acid biosynthetic process|fatty acid metabolic process	ko00061,ko01040	Fatty acid biosynthesis|Biosynthesis of unsaturated fatty acids
LOC115697783	18.0673	30.724	5.41071	0.168147	-2.57221	0.00381226	0.0271769	Down	0.0656683	0.0869495	0.0185723	0.202654	0.131457	0.774198	0.950119	0.322574			GeneID:115697783	putative leucine-rich repeat-containing protein DDB_G0290503
LOC115697804	19.3912	38.1008	0.681672	0.0210525	-5.56987	0.00250975	0.0196734	Down	0	0	0	0.0718074	0	0.0289938	3.49577	0.643886	LIMYB	At5g05800	GeneID:115697804	L10-interacting MYB domain-containing protein-like	GO:0005634	nucleus
LOC115697810	14.6903	5.45202	23.9286	4.90937	2.29554	0.00383255	0.0273012	Up	0.525935	0.71185	1.09079	0.63812	0.0334232	0.0672143	0.414771	0.172232			GeneID:115697810	CASP-like protein 1B2	GO:0016021,GO:0005886,GO:0051539	integral component of membrane|plasma membrane|4 iron, 4 sulfur cluster binding
LOC115697811	74.7022	129.422	19.9823	0.142666	-2.80929	0.000317368	0.00378574	Down	0.20914	0.886131	0.295744	0.0827448	0.976878	3.72856	3.93942	1.0787	ALN	At4g04955	GeneID:115697811	allantoinase	GO:0005737,GO:0005783,GO:0004038,GO:0050897,GO:0008270,GO:0000256,GO:0006995,GO:0006145,GO:0010136	cytoplasm|endoplasmic reticulum|allantoinase activity|cobalt ion binding|zinc ion binding|allantoin catabolic process|cellular response to nitrogen starvation|purine nucleobase catabolic process|ureide catabolic process	ko00230	Purine metabolism
LOC115697814	2435.53	3336.76	1534.31	0.457037	-1.12962	1.81e-05	0.000326925	Down	50.2141	63.4738	47.6241	90.5303	155.928	162.012	122.81	110.682			GeneID:115697814	non-specific lipid-transfer protein 1-like	GO:0008289,GO:0006869	lipid binding|lipid transport
LOC115697831	190.657	303.991	77.3228	0.271832	-1.87921	7.5e-05	0.0011118	Down	0.952113	1.11714	1.40852	1.32134	1.52477	6.75603	2.43122	8.37531	PLP7	At3g54950	GeneID:115697831	patatin-like protein 3	GO:0005886,GO:0047617,GO:0004620,GO:0019374,GO:0016042,GO:0006644,GO:0040008,GO:0051707	plasma membrane|acyl-CoA hydrolase activity|phospholipase activity|galactolipid metabolic process|lipid catabolic process|phospholipid metabolic process|regulation of growth|response to other organism
LOC115697837	108.492	216.984	0	0.000917793	-10.0895	0.00243108	0.0191741	Down	0	0	0	0	0	9.9576	22.5146	6.8617		At1g66100	GeneID:115697837	probable thionin-2.4	GO:0005576,GO:0090729,GO:0006952	extracellular region|toxin activity|defense response
LOC115697843	1247.65	1757.45	737.855	0.420042	-1.25139	2.75e-06	6.28e-05	Down	22.8148	11.8268	15.6321	21.8827	34.9908	57.4714	42.8733	37.9611	CET1		GeneID:115697843	CEN-like protein 1	GO:0005737	cytoplasm
LOC115697885	4611.33	6176	3046.65	0.465974	-1.10168	0.00282483	0.0215623	Down	89.5994	24.0706	32.2776	36.6764	71.7579	99.0845	116.249	85.2833	CAX3	At3g51860	GeneID:115697885	vacuolar cation/proton exchanger 3	GO:0016021,GO:0009705,GO:0005774,GO:0005773,GO:0015369,GO:0070588,GO:0006874,GO:0030026,GO:0006882,GO:0055062,GO:0006793,GO:0051592,GO:0009624	integral component of membrane|plant-type vacuole membrane|vacuolar membrane|vacuole|calcium:proton antiporter activity|calcium ion transmembrane transport|cellular calcium ion homeostasis|cellular manganese ion homeostasis|cellular zinc ion homeostasis|phosphate ion homeostasis|phosphorus metabolic process|response to calcium ion|response to nematode
LOC115697899	16.2233	24.4944	7.9521	0.303251	-1.72141	0.00659402	0.041385	Down	0.0760204	0.140919	0.150501	0.270693	0.3261	0.54649	0.788606	0.336082	ZFP10	At2g37740	GeneID:115697899	zinc finger protein 10-like	GO:0005634,GO:0003700,GO:0046872,GO:0003676,GO:0007275,GO:0040008,GO:0006355	nucleus|DNA-binding transcription factor activity|metal ion binding|nucleic acid binding|multicellular organism development|regulation of growth|regulation of transcription, DNA-templated
LOC115697904	8.97889	17.4971	0.460713	0.0276802	-5.175	3.12e-05	0.000520386	Down	0.0556796	0	0	0.0528703	0.95538	0.76851	1.3376	1.09403			GeneID:115697904	uncharacterized protein LOC115697904
LOC115697931	18.0588	35.6507	0.466977	0.0113936	-6.45564	0.000181474	0.00237251	Down	0.0569373	0	0	0	0.0325653	0.622146	3.04648	0.699213			GeneID:115697931	pathogen-related protein	GO:0006952,GO:0009607	defense response|response to biotic stimulus
LOC115698002	7.32098	2.16394	12.478	6.87643	2.78166	0.00591672	0.0382433	Up	0.563234	0.550717	0.686188	0.493676	0	0.0996662	0.0473099	0.255388			GeneID:115698002	uncharacterized protein LOC115718054
LOC115698039	110.138	194.238	26.0388	0.148311	-2.7533	0.00287761	0.0218523	Down	0.130045	0.551004	0.653853	0.260687	0.0826436	3.55661	6.73728	1.78865		At2g45300	GeneID:115698039	uncharacterized protein LOC115698039	GO:0009507,GO:0009570,GO:0003866,GO:0009073,GO:0009423	chloroplast|chloroplast stroma|3-phosphoshikimate 1-carboxyvinyltransferase activity|aromatic amino acid family biosynthetic process|chorismate biosynthetic process
LOC115698067	33.3733	51.9669	14.7797	0.285837	-1.80673	0.00484479	0.0327505	Down	0.0463945	0.409531	0.244931	0.264322	0.336115	0.960531	1.21586	0.941976			GeneID:115698067	uncharacterized protein LOC115698067
LOC115698071	98.5939	158.831	38.3568	0.240822	-2.05396	6.55e-09	2.78e-07	Down	0.458762	0.293829	0.434502	0.547052	1.35466	2.68742	1.54945	1.65607	FAO4A	At4g19380	GeneID:115698071	long-chain-alcohol oxidase FAO4A	GO:0016021,GO:0050660,GO:0046577	integral component of membrane|flavin adenine dinucleotide binding|long-chain-alcohol oxidase activity
LOC115698079	31.1191	51.7789	10.4592	0.218722	-2.19283	0.00151057	0.0132227	Down	0.312366	0.203616	0.135913	0.410684	0.384801	0.93966	2.85991	1.1803			GeneID:115698079	aldose reductase	GO:0004032	alditol:NADP+ 1-oxidoreductase activity	ko00010,ko00040,ko00561	Glycolysis / Gluconeogenesis|Pentose and glucuronate interconversions|Glycerolipid metabolism
LOC115698081	415.857	586.41	245.303	0.419085	-1.25469	1.85e-09	8.48e-08	Down	4.22709	3.1744	4.60358	4.40321	9.76096	12.3001	8.181	9.17342	PBL8	At5g01020	GeneID:115698081	probable serine/threonine-protein kinase PBL8
LOC115698093	167.078	58.4695	275.687	4.78683	2.25907	1.44e-07	4.67e-06	Up	4.21113	3.80469	4.85154	5.21883	0.31878	1.24652	1.60605	0.730086	PBL8	At5g01020	GeneID:115698093	probable serine/threonine-protein kinase PBL8
LOC115698103	96.494	138.943	54.0451	0.393346	-1.34613	5.69e-06	0.000120666	Down	1.55041	1.86336	1.88886	1.5288	5.21822	5.38412	2.8976	4.10085			GeneID:115698103	uncharacterized protein LOC115698103
LOC115698118	129.807	191.067	68.5471	0.362616	-1.46349	0.000889837	0.00857468	Down	0.675354	1.14184	1.11663	0.838594	0.995385	4.21259	2.80801	2.65396		At2g38420	GeneID:115698118	pentatricopeptide repeat-containing protein At2g38420, mitochondrial
LOC115698126	6278.64	9221.29	3335.99	0.367135	-1.44562	0.000385563	0.00442867	Down	132.843	105.065	150.952	209.027	183.242	331.835	892.078	274.077			GeneID:115698126	non-specific lipid-transfer protein 1-like	GO:0008289,GO:0006869	lipid binding|lipid transport
LOC115698127	13556.9	21093.5	6020.4	0.276431	-1.85501	0.000118006	0.00163514	Down	221.01	104.739	154.376	509.614	298.832	966.919	1605.35	669.25			GeneID:115698127	non-specific lipid-transfer protein 1-like	GO:0008289,GO:0006869,GO:0090378	lipid binding|lipid transport|seed trichome elongation
LOC115698162	350.9	470.469	231.332	0.48542	-1.0427	0.00750461	0.0455647	Down	4.75275	3.75622	8.66398	6.99155	5.01413	18.1276	15.7038	10.9836	BAG3	At5g07220	GeneID:115698162	BAG family molecular chaperone regulator 3-like isoform X1	GO:0051087	chaperone binding
LOC115698169	140.946	243.165	38.7266	0.183439	-2.44662	0.00401078	0.0283292	Down	0.515346	1.06144	0.388666	0.3806	0.196502	2.79909	9.23825	2.84086		At1g30700	GeneID:115698169	berberine bridge enzyme-like 8	GO:0005618,GO:0005576,GO:0071949,GO:0016491	cell wall|extracellular region|FAD binding|oxidoreductase activity
LOC115698181	2017.12	3878.24	156	0.0445633	-4.488	1.98e-08	7.63e-07	Down	4.98682	4.18943	8.5595	10.6542	26.8502	90.4876	518.721	86.1164			GeneID:115698181	non-specific lipid-transfer protein 1-like	GO:0008289,GO:0006869	lipid binding|lipid transport
LOC115698190	115.549	155.876	75.2227	0.48582	-1.04151	0.00473647	0.0321849	Down	1.4079	2.22435	2.15963	1.81269	1.91076	5.32468	5.13324	3.6103		At4g04930	GeneID:115698190	sphingolipid delta(4)-desaturase DES1-like	GO:0005789,GO:0016021,GO:0042284,GO:0046513,GO:0030148	endoplasmic reticulum membrane|integral component of membrane|sphingolipid delta-4 desaturase activity|ceramide biosynthetic process|sphingolipid biosynthetic process	ko00600	Sphingolipid metabolism
LOC115698191	89.9979	157.378	22.6179	0.16483	-2.60095	0.000362657	0.00421599	Down	0.38079	0.568363	0.313294	0.394448	0.277191	2.54827	6.36941	2.5847			GeneID:115698191	uncharacterized protein LOC115698191
LOC115698199	117.604	157.471	77.7366	0.481505	-1.05438	0.000414009	0.00467434	Down	0.82854	0.789872	1.60905	1.32434	1.76917	2.73189	2.68403	2.11636		At1g30700	GeneID:115698199	berberine bridge enzyme-like 8	GO:0005618,GO:0005576,GO:0071949,GO:0016491	cell wall|extracellular region|FAD binding|oxidoreductase activity
LOC115698235	1195.29	2024.43	366.157	0.194699	-2.36068	0.00750672	0.0455647	Down	6.51809	5.77775	4.45176	6.80957	9.57642	12.3029	101.387	9.82181	RCA1		GeneID:115698235	ribulose bisphosphate carboxylase/oxygenase activase 2, chloroplastic-like	GO:0009570,GO:0005524	chloroplast stroma|ATP binding
LOC115698252	571.239	764.44	378.038	0.499707	-1.00085	0.00110877	0.0102326	Down	8.94394	7.12325	9.00231	10.834	8.33351	25.7311	20.5609	18.961	LSH4	At3g23290	GeneID:115698252	protein LIGHT-DEPENDENT SHORT HYPOCOTYLS 4-like	GO:0005634,GO:0003677,GO:0009299,GO:0007275,GO:0090698,GO:0009416	nucleus|DNA binding|mRNA transcription|multicellular organism development|post-embryonic plant morphogenesis|response to light stimulus
LOC115698492	63.3142	9.39349	117.235	13.1498	3.71697	3.24e-05	0.00053813	Up	0.97948	0.724026	1.06821	0.736019	0.0322426	0.21073	0	0.041537	RGA1		GeneID:115698492	putative disease resistance protein RGA1	GO:0043531,GO:0005524,GO:0006952	ADP binding|ATP binding|defense response
LOC115698532	480.589	223.317	737.862	3.54446	1.82557	0.000457067	0.00505122	Up	18.0598	15.0707	18.8112	16.9813	1.83913	2.93853	12.8665	3.57015			GeneID:115698532	mitochondrial outer membrane protein porin of 34 kDa-like	GO:0005741,GO:0046930,GO:0015288,GO:0008308	mitochondrial outer membrane|pore complex|porin activity|voltage-gated anion channel activity
LOC115698550	59.0129	79.1557	38.87	0.474534	-1.07542	0.00305297	0.022742	Down	0.639172	0.627808	0.328674	0.320014	1.02361	0.949043	0.786779	1.15313			GeneID:115698550	uncharacterized protein LOC115698550 isoform X1
LOC115698594	125.947	169.717	82.178	0.484784	-1.04459	8.74e-07	2.27e-05	Down	1.08739	1.05807	1.13001	1.12857	1.77902	2.74866	2.18147	2.45955	CAX5	At1g55730	GeneID:115698594	vacuolar cation/proton exchanger 3-like isoform X1	GO:0016021,GO:0009705,GO:0015369,GO:0070588,GO:0006874	integral component of membrane|plant-type vacuole membrane|calcium:proton antiporter activity|calcium ion transmembrane transport|cellular calcium ion homeostasis
LOC115698677	427.911	643.928	211.894	0.335739	-1.57459	2.9e-05	0.000489359	Down	2.38686	1.99303	1.54471	3.70592	9.91284	8.96571	4.55525	5.92571	CSLH1	Os10g0341700	GeneID:115698677	cellulose synthase-like protein H1 isoform X1	GO:0005794,GO:0000139,GO:0016021,GO:0005886,GO:0005802,GO:0016760,GO:0016759,GO:0071555,GO:0030244,GO:0009833	Golgi apparatus|Golgi membrane|integral component of membrane|plasma membrane|trans-Golgi network|cellulose synthase (UDP-forming) activity|cellulose synthase activity|cell wall organization|cellulose biosynthetic process|plant-type primary cell wall biogenesis
LOC115698702	324.631	461.734	187.527	0.403104	-1.31078	2.37e-06	5.51e-05	Down	4.72927	3.92851	4.70248	6.40508	14.635	9.10416	9.78473	15.2346	D14L	Os11g0384789	GeneID:115698702	probable esterase D14L	GO:0005737,GO:0005634,GO:0016787,GO:0036377,GO:0080167	cytoplasm|nucleus|hydrolase activity|arbuscular mycorrhizal association|response to karrikin
LOC115698704	103.207	56.6699	149.744	2.64495	1.40324	0.000482018	0.0052657	Up	1.34539	1.02083	1.95379	1.73959	0.87319	0.395098	0.41677	0.599947		At2g19230	GeneID:115698704	putative leucine-rich repeat receptor-like serine/threonine-protein kinase At2g19230
LOC115698705	107.052	19.3162	194.787	10.585	3.40395	3.84e-05	0.000624618	Up	2.33987	1.51465	1.77601	2.6206	0.434658	0	0.218379	0.157181		At2g19210	GeneID:115698705	putative leucine-rich repeat receptor-like protein kinase At2g19210
LOC115698722	232.953	318.833	147.073	0.460637	-1.1183	1.2e-07	3.93e-06	Down	3.64848	3.03449	5.31982	4.85015	6.95584	7.92667	11.8634	10.0894	OFP6	At3g52525	GeneID:115698722	transcription repressor OFP6-like	GO:0005634,GO:0045892	nucleus|negative regulation of transcription, DNA-templated
LOC115698730	240.567	138.627	342.508	2.49698	1.32018	0.000135281	0.00183609	Up	4.2966	3.94759	4.20311	4.10145	2.32056	1.69101	0.759136	1.91462	pyr-7		GeneID:115698730	uncharacterized protein LOC115698730 isoform X1	GO:0005524,GO:0003883,GO:0044210,GO:0006541	ATP binding|CTP synthase activity|'de novo' CTP biosynthetic process|glutamine metabolic process	ko00240	Pyrimidine metabolism
LOC115698775	61.6041	123.208	0	0.00145609	-9.42368	6.46e-11	3.67e-09	Down	0	0	0	0	1.47933	12.031	0.955283	5.67995			GeneID:115698775	uncharacterized protein LOC115699169
LOC115698778	259.468	458.887	60.0487	0.245739	-2.0248	0.000977602	0.00926959	Down	1.9315	1.45644	2.77762	2.17598	2.58393	4.33024	7.32828	49.9157	BHLH162	At4g20970	GeneID:115698778	transcription factor bHLH162-like	GO:0090575,GO:0003700,GO:0046983,GO:0000977,GO:0008134,GO:0050832,GO:0006357,GO:0006355	RNA polymerase II transcription factor complex|DNA-binding transcription factor activity|protein dimerization activity|RNA polymerase II regulatory region sequence-specific DNA binding|transcription factor binding|defense response to fungus|regulation of transcription by RNA polymerase II|regulation of transcription, DNA-templated
LOC115698779	79.7689	159.286	0.25179	0.00187963	-9.05534	5.18e-17	5.86e-15	Down	0	0.0179752	0	0	2.54292	2.34222	2.59422	4.03452	SSL10	At3g57030	GeneID:115698779	protein STRICTOSIDINE SYNTHASE-LIKE 10-like isoform X1	GO:0005783,GO:0016020,GO:0009505,GO:0005886,GO:0009506,GO:0005773,GO:0009058	endoplasmic reticulum|membrane|plant-type cell wall|plasma membrane|plasmodesma|vacuole|biosynthetic process
LOC115698783	555.461	838.488	272.434	0.334928	-1.57808	7.56e-06	0.000153923	Down	10.7997	5.79225	5.10352	4.67309	21.3977	32.9938	20.8988	6.28991	FAD4	At4g27030	GeneID:115698783	fatty acid desaturase 4, chloroplastic-like	GO:0009507,GO:0031969,GO:0016021,GO:0052637,GO:0046471,GO:0080167,GO:0006636	chloroplast|chloroplast membrane|integral component of membrane|delta 3-trans-hexadecenoic acid phosphatidylglycerol desaturase activity|phosphatidylglycerol metabolic process|response to karrikin|unsaturated fatty acid biosynthetic process
LOC115698803	26.6508	47.1792	6.12227	0.129451	-2.94952	7.69e-07	2.03e-05	Down	0.137383	0.145524	0.181321	0.130451	1.57153	0.500388	1.17513	1.3272	PHO1	At3g23430	GeneID:115698803	phosphate transporter PHO1-like	GO:0005789,GO:0005794,GO:0000139,GO:0016021,GO:0005886,GO:0005802,GO:0000822,GO:0015114,GO:0016036,GO:0048016,GO:0006817,GO:0006799	endoplasmic reticulum membrane|Golgi apparatus|Golgi membrane|integral component of membrane|plasma membrane|trans-Golgi network|inositol hexakisphosphate binding|phosphate ion transmembrane transporter activity|cellular response to phosphate starvation|inositol phosphate-mediated signaling|phosphate ion transport|polyphosphate biosynthetic process
LOC115698804	9.85307	18.9753	0.730803	0.0386999	-4.69152	0.000107856	0.00151947	Down	0	0.0613185	0	0.0274837	0.893949	0.266331	0.505692	0.65402	AFC2	At4g24740	GeneID:115698804	uncharacterized protein LOC115698804	GO:0005524,GO:0004672,GO:0004674,GO:0004712,GO:0006397,GO:0046777	ATP binding|protein kinase activity|protein serine/threonine kinase activity|protein serine/threonine/tyrosine kinase activity|mRNA processing|protein autophosphorylation
LOC115698810	107.302	199.942	14.6612	0.150149	-2.73553	0.00623108	0.0398043	Down	0.61666	0.0900968	0.192445	0.424016	0.875667	0.440243	1.09132	15.7097	MYB14	At2g31180	GeneID:115698810	transcription factor MYB14-like	GO:0005634,GO:0003700,GO:0043565,GO:0044212,GO:0030154,GO:0045893,GO:0009733,GO:0009409,GO:0009723,GO:0050826,GO:0009753,GO:0009751,GO:0009651	nucleus|DNA-binding transcription factor activity|sequence-specific DNA binding|transcription regulatory region DNA binding|cell differentiation|positive regulation of transcription, DNA-templated|response to auxin|response to cold|response to ethylene|response to freezing|response to jasmonic acid|response to salicylic acid|response to salt stress
LOC115698814	333.009	201.982	464.037	2.26919	1.18218	0.000181876	0.00237501	Up	11.3507	21.4121	10.7156	8.51685	6.96115	4.96049	4.96934	5.79658	MPH1	Os06g0670300	GeneID:115698814	putative Myb family transcription factor At1g14600	GO:0005634,GO:0003677,GO:0003700,GO:0006355	nucleus|DNA binding|DNA-binding transcription factor activity|regulation of transcription, DNA-templated
LOC115698821	269.503	142.335	396.672	3.14865	1.65473	0.00306044	0.0227725	Up	6.7507	7.63986	8.75635	13.7389	7.62152	1.46693	2.08899	1.92266		GSVIVT00023967001	GeneID:115698821	peroxidase P7-like	GO:0005576,GO:0020037,GO:0046872,GO:0004601,GO:0042744,GO:0006979	extracellular region|heme binding|metal ion binding|peroxidase activity|hydrogen peroxide catabolic process|response to oxidative stress	ko00940	Phenylpropanoid biosynthesis
LOC115698828	103.018	191.585	14.4514	0.0867003	-3.52782	0.00251508	0.0196991	Down	0.938622	0.12428	0.442435	0.891263	1.16317	0.719733	29.8085	0.845289	HSP17.5-M		GeneID:115698828	18.1 kDa class I heat shock protein-like	GO:0005737,GO:0043621,GO:0051082,GO:0051259,GO:0006457,GO:0009408,GO:0042542,GO:0000302,GO:0009651	cytoplasm|protein self-association|unfolded protein binding|protein complex oligomerization|protein folding|response to heat|response to hydrogen peroxide|response to reactive oxygen species|response to salt stress	ko04141	Protein processing in endoplasmic reticulum
LOC115698837	76.7082	109.755	43.6612	0.406085	-1.30015	0.00158214	0.0137427	Down	1.38495	1.1861	1.6001	1.28709	2.2921	2.23693	6.17793	3.15548			GeneID:115698837	probable RNA-binding protein EIF1AD	GO:0005829,GO:0005634,GO:0003743,GO:0002183	cytosol|nucleus|translation initiation factor activity|cytoplasmic translational initiation
LOC115698847	730.614	451.905	1009.32	2.26899	1.18205	0.000454235	0.00503381	Up	33.8733	40.9249	40.6228	48.6838	28.5116	10.3807	20.4651	14.0734			GeneID:115698847	uncharacterized protein LOC115698847
LOC115698857	36.5736	54.0616	19.0856	0.355185	-1.49336	6e-05	0.000916402	Down	0.502783	0.505947	0.597227	0.429673	1.66789	1.7349	1.01568	1.35836			GeneID:115698857	uncharacterized protein LOC115698857
LOC115698889	124.954	168.382	81.5275	0.48484	-1.04442	0.000264249	0.00325523	Down	0.855683	0.849021	0.882242	1.15191	2.52758	1.60712	1.60854	1.9899	PDAT2	At3g44830	GeneID:115698889	putative phospholipid:diacylglycerol acyltransferase 2 isoform X1	GO:0016021,GO:0008374,GO:0046027,GO:0006071,GO:0006629	integral component of membrane|O-acyltransferase activity|phospholipid:diacylglycerol acyltransferase activity|glycerol metabolic process|lipid metabolic process	ko00561	Glycerolipid metabolism
LOC115698890	46.5492	92.8648	0.233489	0.00299801	-8.38178	0.00450499	0.0309547	Down	0.034791	0	0	0	0	9.00372	0.0379904	4.88772			GeneID:115698890	PRKR-interacting protein 1-like
LOC115698928	271.307	165.709	376.906	2.37241	1.24635	0.00166333	0.0142545	Up	9.87558	10.1017	10.9419	5.25729	3.10207	2.33935	3.65215	6.86029	NAC090	At5g22380	GeneID:115698928	NAC domain-containing protein 90-like	GO:0005634,GO:0003677,GO:0003700	nucleus|DNA binding|DNA-binding transcription factor activity
LOC115698935	59.5907	90.1502	29.0311	0.312748	-1.67693	0.000345091	0.00405598	Down	0.50023	0.207793	0.288498	0.214212	0.95369	1.30867	0.449837	1.05034	RLP22	At2g32660	GeneID:115698935	receptor-like protein 48	GO:0016021,GO:0005886	integral component of membrane|plasma membrane
LOC115698945	63.2948	93.4967	33.0929	0.355859	-1.49062	1.69e-07	5.38e-06	Down	0.585546	0.640252	0.705153	0.717422	1.70693	1.43389	1.87693	2.50516		At5g07050	GeneID:115698945	WAT1-related protein At5g07050-like	GO:0016021,GO:0005886,GO:0022857	integral component of membrane|plasma membrane|transmembrane transporter activity
LOC115698961	30.436	53.484	7.38806	0.145159	-2.7843	0.000731042	0.00731995	Down	0.0799859	0.112968	0.0452432	0.177217	1.49443	0.551997	0.145569	0.798905	GH36	At5g54510	GeneID:115698961	indole-3-acetic acid-amido synthetase GH3.6-like	GO:0009507,GO:0005737,GO:0010279,GO:0010252,GO:0009734,GO:0009733,GO:0009826	chloroplast|cytoplasm|indole-3-acetic acid amido synthetase activity|auxin homeostasis|auxin-activated signaling pathway|response to auxin|unidimensional cell growth	ko04075	Plant hormone signal transduction
LOC115698978	77.5305	117.731	37.3303	0.313493	-1.67349	7e-05	0.00104707	Down	1.24115	1.4641	1.34027	0.428556	3.90433	4.25026	4.37388	1.63504	BZIP43	At5g38800	GeneID:115698978	ocs element-binding factor 1-like	GO:0005634,GO:0003677,GO:0003700	nucleus|DNA binding|DNA-binding transcription factor activity
LOC115698991	262.038	147.306	376.77	2.44595	1.29039	0.000121499	0.00167028	Up	15.408	17.3054	7.15543	7.99844	5.38359	4.17197	3.60066	5.59552	SAUR50	At4g34760	GeneID:115698991	auxin-responsive protein SAUR71	GO:0009734,GO:0040008	auxin-activated signaling pathway|regulation of growth	ko04075	Plant hormone signal transduction
LOC115699050	13.5576	27.1152	0	0.00678794	-7.20281	8.91e-05	0.00128145	Down	0	0	0	0	0.0964092	2.85972	0.184063	1.78021	HMGCL	At2g26800	GeneID:115699050	hydroxymethylglutaryl-CoA lyase, mitochondrial-like isoform X1	GO:0005759,GO:0005739,GO:0004419,GO:0046872,GO:0046951,GO:0006552,GO:0006629	mitochondrial matrix|mitochondrion|hydroxymethylglutaryl-CoA lyase activity|metal ion binding|ketone body biosynthetic process|leucine catabolic process|lipid metabolic process	ko00072,ko00280,ko00650,ko04146	Synthesis and degradation of ketone bodies|Valine, leucine and isoleucine degradation|Butanoate metabolism|Peroxisome
LOC115699058	40.3187	26.7434	53.8939	2.01904	1.01367	0.00308516	0.022947	Up	0.993912	1.12418	0.914759	0.815795	0.346862	0.484404	0.515062	0.579251		At3g07870	GeneID:115699058	F-box protein At3g07870-like	GO:0009506,GO:0008284	plasmodesma|positive regulation of cell proliferation
LOC115699169	70.5695	140.887	0.25179	0.00211487	-8.88521	3.61e-15	3.43e-13	Down	0	0.0282419	0	0	2.47039	4.01731	6.43414	3.19562			GeneID:115699169	uncharacterized protein LOC115699169
LOC115699276	16.0738	5.13619	27.0114	5.25778	2.39445	0.00211701	0.0172358	Up	0.678372	0.426651	1.03123	0.301943	0.193998	0.0243832	0.115743	0.12496			GeneID:115699276	uncharacterized protein LOC115699276
LOC115699318	123.504	186.446	60.5608	0.321824	-1.63565	2.37e-06	5.51e-05	Down	0.658633	1.1337	1.54608	0.891197	2.48626	3.61734	4.35116	2.68531	APF2	At1g01300	GeneID:115699318	aspartyl protease family protein 2	GO:0016020,GO:0009505,GO:0004190,GO:0030163,GO:0006508,GO:0080167	membrane|plant-type cell wall|aspartic-type endopeptidase activity|protein catabolic process|proteolysis|response to karrikin
LOC115699330	29.1527	58.3054	0	0.0030754	-8.34501	5.56e-13	4.18e-11	Down	0	0	0	0	1.59345	1.42083	2.18119	1.3427			GeneID:115699330	uncharacterized protein LOC115699330 isoform X1
LOC115699388	2603.41	3651.41	1555.42	0.460591	-1.11844	0.00383544	0.0273117	Down	23.6585	27.2315	26.8803	18.8226	39.1877	43.0743	29.0953	116.272	GT3		GeneID:115699388	putative UDP-glucose flavonoid 3-O-glucosyltransferase 3	GO:0016758	transferase activity, transferring hexosyl groups
LOC115699396	1771.79	2851.13	692.456	0.239495	-2.06193	1.28e-11	8.09e-10	Down	24.5775	18.4298	26.9051	10.7711	110.482	65.6457	62.0825	92.7336	EP3	At3g54420	GeneID:115699396	endochitinase EP3-like	GO:0005618,GO:0008061,GO:0004568,GO:0016998,GO:0006032,GO:0006952,GO:0000272,GO:0009617,GO:0009611,GO:0010262	cell wall|chitin binding|chitinase activity|cell wall macromolecule catabolic process|chitin catabolic process|defense response|polysaccharide catabolic process|response to bacterium|response to wounding|somatic embryogenesis	ko00520	Amino sugar and nucleotide sugar metabolism
LOC115699501	618.157	374.802	861.512	2.30134	1.20247	3.81e-11	2.24e-09	Up	5.93389	6.13131	6.54036	6.70083	2.91018	3.2531	2.07406	2.81948	TPL	At1g15750	GeneID:115699501	protein TPR3-like isoform X2	GO:0005829,GO:0005634,GO:0042802,GO:0042803,GO:0009867,GO:0045892,GO:0010072,GO:0009733,GO:0010051	cytosol|nucleus|identical protein binding|protein homodimerization activity|jasmonic acid mediated signaling pathway|negative regulation of transcription, DNA-templated|primary shoot apical meristem specification|response to auxin|xylem and phloem pattern formation
LOC115699606	15.5102	5.74783	25.2726	4.52624	2.17831	0.000455246	0.0050421	Up	0.725401	0.364983	0.3898	0.46494	0.124468	0.146012	0.138619	0.0356329			GeneID:115699606	uncharacterized protein LOC115699606 isoform X1
LOC115699637	528.69	281.116	776.263	2.77151	1.47067	2.25e-11	1.37e-09	Up	14.663	11.1858	13.7154	15.7593	6.40528	4.00357	4.81074	4.84034	SOP3		GeneID:115699637	11-beta-hydroxysteroid dehydrogenase-like 5	GO:0016021,GO:0016491,GO:0006694	integral component of membrane|oxidoreductase activity|steroid biosynthetic process
LOC115699674	721.943	1026.11	417.778	0.40722	-1.29612	3.09e-18	3.93e-16	Down	2.84899	2.55193	3.31212	2.91718	5.72197	7.92044	8.22905	6.91997	EDM2	At5g55390	GeneID:115699674	protein ENHANCED DOWNY MILDEW 2-like isoform X1	GO:0005634,GO:0003700,GO:0046872,GO:0043565,GO:0050832,GO:0070829,GO:0090436,GO:0031937,GO:0009911,GO:0061087,GO:1900111,GO:0044030,GO:2000024,GO:1900363,GO:0006355,GO:0007165,GO:0010228	nucleus|DNA-binding transcription factor activity|metal ion binding|sequence-specific DNA binding|defense response to fungus|heterochromatin maintenance|leaf pavement cell development|positive regulation of chromatin silencing|positive regulation of flower development|positive regulation of histone H3-K27 methylation|positive regulation of histone H3-K9 dimethylation|regulation of DNA methylation…
LOC115699684	1397.68	2393.11	402.259	0.168905	-2.56572	1.48e-17	1.78e-15	Down	5.59387	6.08127	5.01111	6.11218	17.1758	50.0717	39.9668	30.3178	INV1		GeneID:115699684	beta-fructofuranosidase, insoluble isoenzyme 1-like	GO:0005618,GO:0005576,GO:0004564,GO:0005975	cell wall|extracellular region|beta-fructofuranosidase activity|carbohydrate metabolic process	ko00052,ko00500	Galactose metabolism|Starch and sucrose metabolism
LOC115699706	385.62	621.327	149.912	0.240589	-2.05536	1.38e-10	7.49e-09	Down	2.09796	1.6734	3.15974	1.12806	7.82123	7.32642	9.79836	8.54241	PNS1		GeneID:115699706	CTL-like protein DDB_G0274487	GO:0016021,GO:0005886	integral component of membrane|plasma membrane
LOC115699774	62.0162	123.799	0.233489	0.00238408	-8.71235	6.86e-14	5.75e-12	Down	0.0193095	0	0	0	3.1807	1.26595	2.17177	3.50951			GeneID:115699774	uncharacterized protein LOC115699774
LOC115699781	11.5829	23.1658	0	0.0077933	-7.00355	2.78e-07	8.33e-06	Down	0	0	0	0	0.272795	0.224424	0.153877	0.415329			GeneID:115699781	uncharacterized protein LOC115699781
LOC115699794	43.1919	0.752193	85.6316	113.358	6.82475	4.15e-12	2.79e-10	Up	5.67173	7.86208	4.99046	6.8483	0	0	0.229381	0	PDRP1		GeneID:115699794	pyruvate, phosphate dikinase regulatory protein 1, chloroplastic-like, partial	GO:0009507,GO:0005524,GO:0016776,GO:0004674	chloroplast|ATP binding|phosphotransferase activity, phosphate group as acceptor|protein serine/threonine kinase activity
LOC115699816	31.5492	63.0984	0	0.00284163	-8.45907	3.89e-13	3.01e-11	Down	0	0	0	0	2.95955	5.43413	3.07082	3.70217	bVPE	At1g62710	GeneID:115699816	uncharacterized protein LOC115699816	GO:0000326,GO:0004197,GO:0051603,GO:0006624	protein storage vacuole|cysteine-type endopeptidase activity|proteolysis involved in cellular protein catabolic process|vacuolar protein processing
LOC115699963	6.97153	13.6913	0.25179	0.0239348	-5.38475	0.000130294	0.00177847	Down	0	0.0266772	0	0	0.720223	0.202772	0.330009	0.197939			GeneID:115699963	uncharacterized protein LOC115699963
LOC115700026	8.83445	17.6689	0	0.0104618	-6.57873	0.00322102	0.0237466	Down	0	0	0	0	1.43189	0	0.786988	0.596254			GeneID:115700026	uncharacterized protein LOC115700026
LOC115700046	72.0944	135.702	8.48707	0.0684666	-3.86846	1.47e-06	3.64e-05	Down	0.0607475	0.0409482	0.0499799	0.0471947	0.0442203	1.19417	1.03119	0.965736	UVH3	At3g28030	GeneID:115700046	LOW QUALITY PROTEIN: DNA repair protein UVH3-like	GO:0005634,GO:0017108,GO:0008821,GO:0003677,GO:0051908,GO:0003690,GO:0048256,GO:0046872,GO:0045145,GO:0003697,GO:0010213,GO:0006289,GO:0009408,GO:0010224	nucleus|5'-flap endonuclease activity|crossover junction endodeoxyribonuclease activity|DNA binding|double-stranded DNA 5'-3' exodeoxyribonuclease activity|double-stranded DNA binding|flap endonuclease activity|metal ion binding|single-stranded DNA 5'-3' exodeoxyribonuclease activity|single-stranded DNA binding|non-photoreactive DNA repair|nucleotide-excision repair|response to heat|response to U…	ko03420	Nucleotide excision repair
LOC115700049	397.338	183.5	611.176	3.3647	1.75048	3.49e-11	2.08e-09	Up	7.77174	10.7901	9.5299	7.85401	2.22253	1.88358	3.92497	2.84957			GeneID:115700049	uncharacterized protein LOC115700049
LOC115700070	302.588	404.811	200.365	0.494811	-1.01505	1.53e-06	3.75e-05	Down	3.47987	3.80309	4.5824	3.77633	5.74979	10.2287	7.76058	8.13985	PER16	At2g18980	GeneID:115700070	peroxidase 16-like	GO:0005576,GO:0020037,GO:0046872,GO:0004601,GO:0042744,GO:0006979	extracellular region|heme binding|metal ion binding|peroxidase activity|hydrogen peroxide catabolic process|response to oxidative stress	ko00940	Phenylpropanoid biosynthesis
LOC115700095	18.3909	32.6932	4.08851	0.135476	-2.88389	0.000835676	0.00815506	Down	0.055181	0.0876763	0.312125	0.0261984	0.441851	0.888566	0.572426	1.95162			GeneID:115700095	uncharacterized protein LOC115700095
LOC115700277	34.9667	69.6695	0.263894	0.00430429	-7.86001	1.01e-06	2.58e-05	Down	0	0	0.0210245	0	0.170073	3.42018	0.121763	1.86234	3AT2	At1g03495	GeneID:115700277	coumaroyl-CoA:anthocyanidin 3-O-glucoside-6''-O-coumaroyltransferase 2-like	GO:0016747	transferase activity, transferring acyl groups other than amino-acyl groups
LOC115700296	305.847	417.704	193.991	0.464389	-1.10659	0.00489229	0.033024	Down	3.40011	4.69862	3.89068	4.06352	11.087	3.59613	12.1839	7.79421	PMAT1	At5g39050	GeneID:115700296	malonyl-CoA:anthocyanidin 5-O-glucoside-6''-O-malonyltransferase-like	GO:0005829,GO:0050736,GO:0009636	cytosol|O-malonyltransferase activity|response to toxic substance
LOC115700397	64.6356	90.0409	39.2303	0.429696	-1.21861	1.3e-05	0.00024648	Down	1.37766	1.0613	1.02012	0.713534	2.72201	2.21841	2.78987	1.87023			GeneID:115700397	pathogenesis-related thaumatin-like protein 3.5
LOC115700446	1618.04	1070.17	2165.9	2.00912	1.00657	3.88e-05	0.000629294	Up	34.252	40.4395	26.6278	26.8865	11.505	22.4618	13.9723	16.0017	EDR2L	At5g45560	GeneID:115700446	uncharacterized protein LOC115700446	GO:0005789,GO:0010008,GO:0016021,GO:0005886,GO:0008289,GO:0006952	endoplasmic reticulum membrane|endosome membrane|integral component of membrane|plasma membrane|lipid binding|defense response
LOC115700454	2845.8	1364.89	4326.71	3.17959	1.66884	0.000599981	0.00628964	Up	74.8752	68.859	87.6047	76.0768	31.0478	4.70208	30.1868	30.9942	UGT71K2		GeneID:115700454	anthocyanidin 3-O-glucosyltransferase 2-like	GO:0035251	UDP-glucosyltransferase activity
LOC115700517	17.4449	31.5183	3.37153	0.106805	-3.22695	0.00605825	0.0389126	Down	0.146711	0.207207	0.110648	0.232182	0.223765	4.38742	0.106802	1.92179	MIF2	At3g28917	GeneID:115700517	mini zinc finger protein 2-like	GO:0005737,GO:0005634,GO:0003677,GO:0046872,GO:0042803,GO:0010582,GO:0035670	cytoplasm|nucleus|DNA binding|metal ion binding|protein homodimerization activity|floral meristem determinacy|plant-type ovary development
LOC115700526	1534.04	2480.41	587.674	0.23602	-2.08302	1.5e-22	2.53e-20	Down	18.3628	14.2467	23.1357	20.7894	84.0912	58.0293	95.261	86.8827	EXPA23	At5g39280	GeneID:115700526	expansin-A23-like
LOC115700564	2584.9	1686.16	3483.63	2.064	1.04545	0.00822797	0.0489069	Up	92.6101	62.8289	51.3342	62.0572	55.133	15.5908	19.3511	39.1282	HHO2	At1g68670	GeneID:115700564	transcription factor HHO2	GO:0005634,GO:0003677,GO:0003700,GO:0055062,GO:0006355,GO:0009737	nucleus|DNA binding|DNA-binding transcription factor activity|phosphate ion homeostasis|regulation of transcription, DNA-templated|response to abscisic acid
LOC115700571	164.298	224.885	103.711	0.459786	-1.12096	0.00266432	0.0206059	Down	2.23268	1.62116	2.62763	1.45325	4.88137	2.44376	6.21295	3.69704	PYR4	At4g22930	GeneID:115700571	dihydroorotase, mitochondrial-like	GO:0009507,GO:0005739,GO:0004151,GO:0046872,GO:0006207,GO:0044205,GO:0006221	chloroplast|mitochondrion|dihydroorotase activity|metal ion binding|'de novo' pyrimidine nucleobase biosynthetic process|'de novo' UMP biosynthetic process|pyrimidine nucleotide biosynthetic process	ko00240	Pyrimidine metabolism
LOC115700622	38.1815	54.6163	21.7468	0.400076	-1.32166	0.00592019	0.0382433	Down	0.682247	0.361337	0.41347	0.786643	0.780423	1.98982	1.623	1.31659	OFP7	At2g18500	GeneID:115700622	transcription repressor OFP7-like	GO:0005634,GO:0005886,GO:0045892	nucleus|plasma membrane|negative regulation of transcription, DNA-templated
LOC115700637	164.771	241.169	88.3722	0.365287	-1.4529	1.88e-07	5.89e-06	Down	1.65319	1.19397	1.97648	2.21195	2.92258	5.89894	5.72334	4.87244		At2g30890	GeneID:115700637	cytochrome b561 domain-containing protein At2g30890-like isoform X1	GO:0016021,GO:0046872,GO:0055114	integral component of membrane|metal ion binding|oxidation-reduction process
LOC115700640	1371.08	1969.99	772.17	0.438545	-1.1892	0.000843771	0.00821736	Down	28.8902	18.1994	29.6739	23.4555	31.1941	53.5538	45.6678	126.926			GeneID:115700640	uncharacterized protein LOC115700640
LOC115700649	80.0897	120.165	40.014	0.308317	-1.69751	3.07e-07	9.09e-06	Down	3.84672	2.49007	1.63189	1.11608	8.00605	6.69818	6.12567	6.45604			GeneID:115700649	uncharacterized protein LOC115700649
LOC115700667	2092.16	2929.7	1254.61	0.443575	-1.17275	0.00421653	0.0295326	Down	24.2219	10.0974	16.2343	27.7564	29.1569	24.5554	83.6434	47.6506		At3g47200	GeneID:115700667	UPF0481 protein At3g47200-like	GO:0016021,GO:0005886	integral component of membrane|plasma membrane
LOC115700682	149.504	214.537	84.47	0.392759	-1.34828	0.000136256	0.00184672	Down	1.83943	1.09858	1.70458	2.3598	3.5815	3.35362	7.17961	3.84493			GeneID:115700682	uncharacterized protein LOC115700682 isoform X1
LOC115700704	2228.96	1352.83	3105.09	2.28062	1.18943	4.1e-05	0.000658399	Up	32.4935	35.4754	41.3001	52.5652	25.5918	12.1653	14.7627	17.9633	NFD4	At1g31470	GeneID:115700704	protein NUCLEAR FUSION DEFECTIVE 4-like	GO:0016021,GO:0005739,GO:0000741,GO:0010197,GO:0009651	integral component of membrane|mitochondrion|karyogamy|polar nucleus fusion|response to salt stress
LOC115700712	2427.47	3600.21	1254.74	0.382259	-1.38738	0.00404005	0.0285045	Down	38.2994	38.9832	26.705	18.6318	58.5108	52.7933	44.6127	196.979	MIP1B	At3g21890	GeneID:115700712	zinc finger protein CONSTANS-LIKE 1-like	GO:0005634,GO:0003700,GO:0030674,GO:0008270,GO:0007623,GO:0009909,GO:0006355,GO:0010224	nucleus|DNA-binding transcription factor activity|protein binding, bridging|zinc ion binding|circadian rhythm|regulation of flower development|regulation of transcription, DNA-templated|response to UV-B
LOC115700717	452.553	616.285	288.821	0.495979	-1.01165	0.00073967	0.00739478	Down	13.0787	9.98466	10.1748	14.8056	35.6722	31.577	20.8003	14.6625		At5g52780	GeneID:115700717	uncharacterized protein PAM68-like	GO:0009507,GO:0009535,GO:0016021	chloroplast|chloroplast thylakoid membrane|integral component of membrane
LOC115700740	591.313	1096.96	85.6645	0.0820899	-3.60665	1.55e-16	1.67e-14	Down	2.26784	2.82324	1.63984	1.75381	21.6895	20.1685	13.301	53.9085			GeneID:115700740	uncharacterized protein LOC115700740
LOC115700742	202.32	285.513	119.127	0.433128	-1.20713	0.000293045	0.0035347	Down	1.03328	1.66108	1.78778	1.65064	2.09974	4.02685	2.33625	6.36547	LSF1	At3g01510	GeneID:115700742	phosphoglucan phosphatase LSF1, chloroplastic isoform X1	GO:0009507,GO:0009569,GO:0009570,GO:0043036,GO:0019203,GO:0008138,GO:0005983	chloroplast|chloroplast starch grain|chloroplast stroma|starch grain|carbohydrate phosphatase activity|protein tyrosine/serine/threonine phosphatase activity|starch catabolic process
LOC115700771	38.6956	72.3379	5.05331	0.0533614	-4.22806	8.29e-08	2.84e-06	Down	0	0.0661894	0.0883623	0.178002	0.464611	2.15616	0.835852	1.3966		At1g25530	GeneID:115700771	lysine histidine transporter-like 6 isoform X1	GO:0016021,GO:0005886,GO:0015171,GO:0003333	integral component of membrane|plasma membrane|amino acid transmembrane transporter activity|amino acid transmembrane transport
LOC115700791	4.65873	8.59285	0.724606	0.0852058	-3.5529	0.00684372	0.0425376	Down	0.0388898	0	0.0439952	0.0369276	0.0889723	0.536772	0.509593	0.305653	PRE6	At1g26945	GeneID:115700791	transcription factor PRE6	GO:0005737,GO:0005634,GO:0046983,GO:0040008,GO:0009416	cytoplasm|nucleus|protein dimerization activity|regulation of growth|response to light stimulus
LOC115700792	20.3188	36.8903	3.74736	0.0914487	-3.45089	0.00143875	0.0126865	Down	0.188629	0.0399613	0	0.0716446	0.129464	1.58381	0.65912	0.630072			GeneID:115700792	exopolygalacturonase-like	GO:0005618,GO:0005576,GO:0047911,GO:0004650,GO:0005975,GO:0071555	cell wall|extracellular region|galacturan 1,4-alpha-galacturonidase activity|polygalacturonase activity|carbohydrate metabolic process|cell wall organization	ko00040	Pentose and glucuronate interconversions
LOC115700796	1845.37	1223.84	2466.89	2.01312	1.00943	0.00017681	0.00232259	Up	42.2589	46.0737	40.449	37.0991	24.8233	11.2392	24.1464	22.2388	UGT82A1	At3g22250	GeneID:115700796	UDP-glycosyltransferase 82A1	GO:0043231,GO:0080043,GO:0080044,GO:0008194	intracellular membrane-bounded organelle|quercetin 3-O-glucosyltransferase activity|quercetin 7-O-glucosyltransferase activity|UDP-glycosyltransferase activity
LOC115700797	288.393	392.453	184.334	0.492457	-1.02193	0.00258481	0.0201385	Down	4.14727	3.6306	3.23767	2.3921	7.0769	12.8322	5.83859	2.98005			GeneID:115700797	uncharacterized protein LOC115700797
LOC115700800	987.297	1384.24	590.355	0.441231	-1.18039	1.51e-05	0.000280559	Down	17.3204	14.3099	18.4941	15.6978	19.6024	47.4921	34.7842	53.9663	FLA13	At5g44130	GeneID:115700800	fasciclin-like arabinogalactan protein 13	GO:0031225,GO:0046658,GO:0005794,GO:0009505,GO:0005886,GO:0009506,GO:0009834	anchored component of membrane|anchored component of plasma membrane|Golgi apparatus|plant-type cell wall|plasma membrane|plasmodesma|plant-type secondary cell wall biogenesis
LOC115700867	65187.3	39154.9	91219.7	2.41413	1.2715	4.13e-06	9.09e-05	Up	4296.2	2504.14	4023.58	3002.02	795.905	1553.2	1639.67	1996.68			GeneID:115700867	uncharacterized protein LOC115700867
LOC115700894	4.9067	9.35269	0.460713	0.0525512	-4.25013	0.00762708	0.0461058	Down	0.0209114	0	0	0.0198563	0.430569	0.0240522	0.15984	0.20544	AGD15	At3g17660	GeneID:115700894	probable ADP-ribosylation factor GTPase-activating protein AGD15	GO:0005096,GO:0046872	GTPase activator activity|metal ion binding	ko04144	Endocytosis
LOC115700897	1307.08	1788.61	825.549	0.463044	-1.11078	0.000408811	0.00463746	Down	11.6199	8.96057	12.6796	13.2151	13.1553	31.603	38.0944	19.2177	GH310	At4g03400	GeneID:115700897	indole-3-acetic acid-amido synthetase GH3.10	GO:0009507,GO:0016874,GO:0009416	chloroplast|ligase activity|response to light stimulus	ko04075	Plant hormone signal transduction
LOC115700908	389.288	759.363	19.2133	0.025109	-5.31565	3.99e-47	2.12e-44	Down	0.277285	0.519651	0.554983	0.384814	12.8338	25.5636	11.5523	19.2575			GeneID:115700908	paramyosin
LOC115700924	37.6808	54.8451	20.5164	0.380592	-1.39368	0.00769829	0.0464194	Down	0.196656	0.124985	0.266967	0.547751	0.434913	0.527783	0.415164	1.68729			GeneID:115700924	putative cysteine-rich receptor-like protein kinase 43 isoform X1
LOC115700935	133.036	241.462	24.6098	0.0934813	-3.41918	7.17e-21	1.07e-18	Down	0.122383	0.444462	0.553796	0.697247	3.67984	4.10228	5.21184	5.03261	VRN1	At3g18990	GeneID:115700935	B3 domain-containing transcription factor VRN1-like	GO:0005654,GO:0003677,GO:0043565,GO:0009909,GO:0010048	nucleoplasm|DNA binding|sequence-specific DNA binding|regulation of flower development|vernalization response
LOC115700938	42.9659	12.2476	73.6842	5.13446	2.36021	0.000543795	0.00582464	Up	2.90592	3.94114	0.860256	0.773635	0.372795	0.156186	0.622766	0.26681	rglB		GeneID:115700938	rhamnogalacturonate lyase B-like	GO:0005576,GO:0030246,GO:0016837,GO:0102210,GO:0071555,GO:0045490	extracellular region|carbohydrate binding|carbon-oxygen lyase activity, acting on polysaccharides|rhamnogalacturonan endolyase activity|cell wall organization|pectin catabolic process
LOC115700945	538.27	735.716	340.823	0.467129	-1.09811	6.58e-05	0.000990875	Down	5.59099	4.76782	5.02794	5.06696	6.23362	13.1545	15.4869	9.81745	AVT1A	At2g41190	GeneID:115700945	amino acid transporter AVT1A	GO:0016021,GO:0005774,GO:0015171,GO:0003333	integral component of membrane|vacuolar membrane|amino acid transmembrane transporter activity|amino acid transmembrane transport
LOC115701058	374.08	580.975	167.184	0.269576	-1.89124	3.32e-08	1.22e-06	Down	1.77614	1.82659	4.4868	4.12625	11.3816	10.9087	7.66373	12.6381		At2g42690	GeneID:115701058	phospholipase A1-IIdelta	GO:0009507,GO:0005737,GO:0008970,GO:0071493,GO:0016042,GO:0009650	chloroplast|cytoplasm|phospholipase A1 activity|cellular response to UV-B|lipid catabolic process|UV protection
LOC115701075	35.2357	57.5379	12.9335	0.21486	-2.21853	0.000141093	0.0019002	Down	0.637755	0.234972	0.470529	0.184306	0.91984	2.74281	1.57447	1.60724			GeneID:115701075	uncharacterized protein LOC115701075
LOC115701091	140.02	223.845	56.1947	0.254652	-1.9734	0.000603817	0.00631607	Down	0.780828	1.46185	1.00659	1.06904	1.53712	4.86648	9.141	1.99806			GeneID:115701091	jasmonate O-methyltransferase	GO:0005737,GO:0005634,GO:0030795,GO:0102078,GO:0031408	cytoplasm|nucleus|jasmonate O-methyltransferase activity|methyl jasmonate methylesterase activity|oxylipin biosynthetic process	ko00592	alpha-Linolenic acid metabolism
LOC115701116	90.2371	153.766	26.708	0.170241	-2.55435	3.11e-09	1.38e-07	Down	0.49139	0.780763	0.397071	0.316619	2.14803	2.96728	4.44593	2	MRS2-11	At5g22830	GeneID:115701116	magnesium transporter MRS2-11, chloroplastic-like	GO:0009507,GO:0009941,GO:0031969,GO:0016021,GO:0015095,GO:0010960,GO:1903830,GO:0015693,GO:0010117,GO:0010027	chloroplast|chloroplast envelope|chloroplast membrane|integral component of membrane|magnesium ion transmembrane transporter activity|magnesium ion homeostasis|magnesium ion transmembrane transport|magnesium ion transport|photoprotection|thylakoid membrane organization
LOC115701156	12.6151	5.45391	19.7763	3.61128	1.85251	0.00585813	0.0379957	Up	0.861467	0.541805	0.395915	0.460125	0.184769	0.123857	0.264568	0.0528958		At5g47530	GeneID:115701156	cytochrome b561 and DOMON domain-containing protein At5g47530-like	GO:0016021,GO:0046872,GO:0055114	integral component of membrane|metal ion binding|oxidation-reduction process
LOC115701215	1170.36	1656.6	684.126	0.409343	-1.28862	0.000227255	0.00286381	Down	14.8365	17.6992	10.1846	26.6485	39.6551	63.0684	31.4056	35.5435	NIP5-1	At4g10380	GeneID:115701215	probable aquaporin NIP5-1	GO:0016021,GO:0016328,GO:0005886,GO:0046715,GO:0015105,GO:0015250,GO:0015700,GO:0046713,GO:0080029,GO:0046685,GO:0010036	integral component of membrane|lateral plasma membrane|plasma membrane|active borate transmembrane transporter activity|arsenite transmembrane transporter activity|water channel activity|arsenite transport|borate transport|cellular response to boron-containing substance levels|response to arsenic-containing substance|response to boron-containing substance
LOC115701247	18554.1	25137.8	11970.5	0.461838	-1.11454	0.000612999	0.00640166	Down	220.726	138.178	303.169	354.058	459.851	658.05	698.611	337.82			GeneID:115701247	carbonic anhydrase 2 isoform X1	GO:0009570,GO:0004089,GO:0008270,GO:0015976	chloroplast stroma|carbonate dehydratase activity|zinc ion binding|carbon utilization	ko00910	Nitrogen metabolism
LOC115701322	768.298	1039.43	497.163	0.483814	-1.04748	0.00310122	0.0230313	Down	8.88715	7.18302	4.55838	8.91866	7.41975	22.1072	16.7719	16.3448	DTX40	At3g21690	GeneID:115701322	protein DETOXIFICATION 40	GO:0016021,GO:0005774,GO:0005773,GO:0015297,GO:0015238,GO:0006855	integral component of membrane|vacuolar membrane|vacuole|antiporter activity|drug transmembrane transporter activity|drug transmembrane transport
LOC115701460	75.538	101.014	50.0621	0.482515	-1.05136	0.00766198	0.0462585	Down	1.01446	0.716379	1.8854	1.51371	2.04458	2.97262	3.4551	1.96954			GeneID:115701460	uncharacterized protein LOC115701460			ko03410	Base excision repair
LOC115701485	78.0616	118.372	37.7518	0.316056	-1.66175	7.45e-05	0.00110619	Down	0.253924	0.502078	0.430888	0.168778	0.910119	1.2656	1.27546	0.831543	PHO1-H1	At1g68740	GeneID:115701485	phosphate transporter PHO1 homolog 1	GO:0005794,GO:0016021,GO:0005886,GO:0005802,GO:0015114,GO:0016036,GO:0006817	Golgi apparatus|integral component of membrane|plasma membrane|trans-Golgi network|phosphate ion transmembrane transporter activity|cellular response to phosphate starvation|phosphate ion transport
LOC115701490	868.748	548.697	1188.8	2.17475	1.12085	7.08e-11	4.01e-09	Up	18.8933	14.4038	21.1295	18.145	7.63749	6.86854	9.64758	9.51397		At3g19850	GeneID:115701490	BTB/POZ domain-containing protein At3g19850	GO:0016567	protein ubiquitination
LOC115701491	93.9295	149.774	38.0846	0.204574	-2.2893	0.00563696	0.0367975	Down	0.130104	0.0861336	1.69262	0.725796	3.64625	1.92668	1.58051	3.14753	CYP71D9		GeneID:115701491	cytochrome P450 71D9-like	GO:0016020,GO:0020037,GO:0005506,GO:0016709	membrane|heme binding|iron ion binding|oxidoreductase activity,acting on paired donors, with incorporation or reduction of molecular oxygen, NAD(P)H as one donor, and incorporation of one atom of oxygen
LOC115701492	268.175	360.697	175.653	0.477511	-1.0664	0.000142119	0.00191134	Down	3.96121	2.64471	5.59475	5.67621	8.62307	9.30563	11.2724	7.75966		At1g27930	GeneID:115701492	probable methyltransferase At1g27930	GO:0005768,GO:0005794,GO:0000139,GO:0016021,GO:0005802,GO:0008168,GO:0009834,GO:0045492,GO:0045491	endosome|Golgi apparatus|Golgi membrane|integral component of membrane|trans-Golgi network|methyltransferase activity|plant-type secondary cell wall biogenesis|xylan biosynthetic process|xylan metabolic process
LOC115701526	7.40451	14.5572	0.25179	0.0202511	-5.62586	0.000616267	0.00641435	Down	0	0.0308201	0	0	0.133132	1.10438	0.127086	0.457357	PHR2		GeneID:115701526	protein PHR1-LIKE 1-like	GO:0005634,GO:0003677	nucleus|DNA binding
LOC115701537	30.1964	42.0627	18.3302	0.419485	-1.25331	0.0071595	0.0439946	Down	0.142463	0.246935	0.219771	0.393527	0.57778	0.580959	0.381838	0.776143	MYB105	At1g69560	GeneID:115701537	myb-like protein H	GO:0005634,GO:0003677,GO:0003700,GO:0007275,GO:0010199,GO:0006355	nucleus|DNA binding|DNA-binding transcription factor activity|multicellular organism development|organ boundary specification between lateral organs and the meristem|regulation of transcription, DNA-templated
LOC115701553	47.7709	75.1007	20.4411	0.283676	-1.81769	0.00010107	0.00143252	Down	0.377993	0.629186	0.794142	0.538381	1.08097	1.42852	3.86218	2.33421			GeneID:115701553	secoisolariciresinol dehydrogenase-like	GO:0102911,GO:0009807	(-)-secoisolariciresinol dehydrogenase activity|lignan biosynthetic process
LOC115701564	78.5066	117.534	39.4792	0.292656	-1.77272	2.47e-05	0.00042761	Down	0.274669	0.318654	0.429099	1.15502	1.40639	1.71501	1.771	1.67046	PLP2	At2g26560	GeneID:115701564	patatin-like protein 2 isoform X1	GO:0005737,GO:0016020,GO:0047372,GO:0016298,GO:0004620,GO:0071456,GO:0051607,GO:0016042,GO:0006629,GO:0031408,GO:0009626,GO:0046686	cytoplasm|membrane|acylglycerol lipase activity|lipase activity|phospholipase activity|cellular response to hypoxia|defense response to virus|lipid catabolic process|lipid metabolic process|oxylipin biosynthetic process|plant-type hypersensitive response|response to cadmium ion
LOC115701584	2022.61	1315.73	2729.48	2.0567	1.04033	0.00590141	0.0381887	Up	41.4443	43.3588	48.0227	57.7149	9.95686	40.8809	25.742	16.7303	CYP87A3	Os04g0570000	GeneID:115701584	cytochrome P450 87A3-like	GO:0030659,GO:0016021,GO:0020037,GO:0005506,GO:0004497,GO:0016705,GO:0016132,GO:0010268,GO:0007275,GO:0055114,GO:0016125	cytoplasmic vesicle membrane|integral component of membrane|heme binding|iron ion binding|monooxygenase activity|oxidoreductase activity, acting on paired donors, with incorporation or reduction of molecular oxygen|brassinosteroid biosynthetic process|brassinosteroid homeostasis|multicellular organism development|oxidation-reduction process|sterol metabolic process
LOC115701991	196.288	83.4088	309.168	3.7105	1.89162	0.00016928	0.00223439	Up	5.53697	3.32508	5.88572	4.33303	1.82864	0.33431	1.72974	1.24214	CYP72A14	At3g14680	GeneID:115701991	cytochrome P450 72A14-like	GO:0016021,GO:0020037,GO:0005506,GO:0004497,GO:0016705	integral component of membrane|heme binding|iron ion binding|monooxygenase activity|oxidoreductase activity, acting on paired donors, with incorporation or reduction of molecular oxygen
LOC115701996	13.1056	3.83957	22.3717	5.63512	2.49445	0.00680068	0.042295	Up	1.62511	1.18347	1.49374	0.530446	0.406649	0	0.11091	0.299355			GeneID:115701996	uncharacterized protein LOC115701996
LOC115702014	231.161	143.604	318.718	2.16941	1.1173	0.0041114	0.0289314	Up	10.7881	14.3675	7.02476	6.46687	6.5794	2.50143	3.21844	5.06031		At5g39865	GeneID:115702014	uncharacterized protein At5g39865-like	GO:0005886,GO:0009055,GO:0015035,GO:0045454	plasma membrane|electron transfer activity|protein disulfide oxidoreductase activity|cell redox homeostasis
LOC115702027	61.5695	123.139	0	0.0015172	-9.36437	0.00400796	0.0283197	Down	0	0	0	0	0	7.12697	5.85268	3.53072			GeneID:115702027	uncharacterized protein LOC115702027
LOC115702034	12.6807	1.57593	23.7856	14.3523	3.84321	0.000915419	0.00877714	Up	0.621878	2.47992	0.331067	0.243147	0.0836903	0.0420754	0.119835	0		At1g64065	GeneID:115702034	late embryogenesis abundant protein At1g64065-like	GO:0016021,GO:0005886	integral component of membrane|plasma membrane
LOC115702063	7.24256	14.2212	0.263894	0.0238792	-5.3881	0.000413264	0.00466867	Down	0	0	0.00640176	0	0.0582587	0.0130176	0.105047	0.166784	TY3B-G	YGR109W-B	GeneID:115702063	LOW QUALITY PROTEIN: uncharacterized protein LOC115702063	GO:0005737,GO:0005634,GO:0000943,GO:0004190,GO:0005524,GO:0003677,GO:0003887,GO:0008233,GO:0004540,GO:0003723,GO:0003964,GO:0004523,GO:0008270,GO:0015074,GO:0006310,GO:0032197	cytoplasm|nucleus|retrotransposon nucleocapsid|aspartic-type endopeptidase activity|ATP binding|DNA binding|DNA-directed DNA polymerase activity|peptidase activity|ribonuclease activity|RNA binding|RNA-directed DNA polymerase activity|RNA-DNA hybrid ribonuclease activity|zinc ion binding|DNA integration|DNA recombination|transposition, RNA-mediated
LOC115702093	1176.55	1588.49	764.606	0.48265	-1.05095	1.58e-21	2.47e-19	Down	14.2752	10.4931	11.5654	10.4469	27.2157	25.4416	24.7045	20.13	CYP704C1		GeneID:115702093	cytochrome P450 704C1-like	GO:0016021,GO:0020037,GO:0005506,GO:0004497,GO:0016705	integral component of membrane|heme binding|iron ion binding|monooxygenase activity|oxidoreductase activity, acting on paired donors, with incorporation or reduction of molecular oxygen
LOC115702108	43.3892	73.6839	13.0945	0.158983	-2.65306	6.2e-06	0.000129919	Down	0.399634	0.195376	0.173884	0.08757	0.685713	2.05078	1.52734	0.604021	KUA1	At5g47390	GeneID:115702108	probable transcription factor At5g61620	GO:0005634,GO:0003700,GO:0000976,GO:0008270,GO:0010252,GO:0048527,GO:0048366,GO:0010150,GO:2000469,GO:0000122,GO:0045892,GO:0030307,GO:0090697,GO:0006355,GO:0009737,GO:0009646,GO:0009733,GO:0046686,GO:0009723,GO:0009739,GO:0009753,GO:0009751,GO:0009651,GO:0009744	nucleus|DNA-binding transcription factor activity|transcription regulatory region sequence-specific DNA binding|zinc ion binding|auxin homeostasis|lateral root development|leaf development|leaf senescence|negative regulation of peroxidase activity|negative regulation of transcription by RNA polymerase II|negative regulation of transcription, DNA-templated|positive regulation of cell growth|post-e…
LOC115702113	575.795	374.257	777.333	2.08013	1.05668	0.000541779	0.00580953	Up	12.6953	12.5456	13.7489	12.0401	4.35666	9.25988	3.75309	7.39212			GeneID:115702113	myosin heavy chain, cardiac muscle isoform-like isoform X1
LOC115702122	835.285	1228.42	442.154	0.388147	-1.36532	0.000317064	0.00378447	Down	5.16309	5.88303	4.01416	4.20919	4.54132	15.3669	14.0161	20.3098	RSH3	At1g54130	GeneID:115702122	probable GTP diphosphokinase RSH2, chloroplastic	GO:0009507,GO:0005524,GO:0005525,GO:0008728,GO:0016301,GO:0015970,GO:0010150,GO:0015979	chloroplast|ATP binding|GTP binding|GTP diphosphokinase activity|kinase activity|guanosine tetraphosphate biosynthetic process|leaf senescence|photosynthesis	ko00230	Purine metabolism
LOC115702125	1475.91	2066.56	885.264	0.431938	-1.2111	5.5e-10	2.7e-08	Down	15.4252	10.491	14.0924	17.6844	29.5548	27.3471	33.8049	44.7526			GeneID:115702125	pectinesterase/pectinesterase inhibitor PPE8B-like	GO:0005618,GO:0005576,GO:0045330,GO:0004857,GO:0030599,GO:0042545,GO:0045490	cell wall|extracellular region|aspartyl esterase activity|enzyme inhibitor activity|pectinesterase activity|cell wall modification|pectin catabolic process	ko00040	Pentose and glucuronate interconversions
LOC115702129	12.8391	20.894	4.78414	0.232552	-2.10438	0.00151571	0.0132616	Down	0.106181	0.0321352	0.0686403	0.100824	0.260273	0.366388	0.248454	0.476873	PME45	At4g33230	GeneID:115702129	LOW QUALITY PROTEIN: putative pectinesterase/pectinesterase inhibitor 45	GO:0005618,GO:0016021,GO:0045330,GO:0030599,GO:0046910,GO:0042545,GO:0045490	cell wall|integral component of membrane|aspartyl esterase activity|pectinesterase activity|pectinesterase inhibitor activity|cell wall modification|pectin catabolic process
LOC115702133	548.601	321.096	776.106	2.51363	1.32977	0.00796189	0.0476795	Up	11.807	13.1067	11.603	12.4994	3.18892	1.73183	11.7369	3.89581			GeneID:115702133	uncharacterized protein LOC115702133
LOC115702179	317.714	164.929	470.498	2.79388	1.48227	7.26e-06	0.000148697	Up	7.5066	4.77806	10.9569	10.716	3.23222	2.87802	1.97023	3.84623	7DLGT		GeneID:115702179	7-deoxyloganetic acid glucosyl transferase-like
LOC115702181	9.58438	0	19.1688	92.0286	6.52401	3.29e-06	7.39e-05	Up	0.146067	0.438381	0.743593	0.647255	0	0	0	0	UGT709C2		GeneID:115702181	7-deoxyloganetic acid glucosyltransferase-like isoform X1	GO:0102970,GO:0035251,GO:1900994	7-deoxyloganetic acid glucosyltransferase activity|UDP-glucosyltransferase activity|(-)-secologanin biosynthetic process
LOC115702198	24.7893	6.05176	43.5268	7.05043	2.81771	0.00190051	0.0158279	Up	1.91518	2.9989	2.0253	0.751139	0	0.383101	0.545555	0.163612		At1g64065	GeneID:115702198	late embryogenesis abundant protein At1g64065-like	GO:0016021,GO:0005886	integral component of membrane|plasma membrane
LOC115702224	216.91	5.60367	428.217	76.0295	6.24849	2.5e-65	2.82e-62	Up	15.3497	17.0984	13.8545	13.6035	0.188801	0.227808	0.144182	0.227011	FAX5	At1g50740	GeneID:115702224	protein FATTY ACID EXPORT 5-like	GO:0016021	integral component of membrane
LOC115702231	64.2752	0	128.55	677.144	9.40332	3.18e-17	3.65e-15	Up	3.10534	1.72774	1.54359	2.17426	0	0	0	0	CYP20-1	At5g58710	GeneID:115702231	peptidyl-prolyl cis-trans isomerase CYP20-3, chloroplastic-like	GO:0009507,GO:0005829,GO:0005783,GO:0005768,GO:0005576,GO:0005795,GO:0016020,GO:0005771,GO:0005886,GO:0009506,GO:0005802,GO:0003755,GO:0051082,GO:0006457,GO:0048364	chloroplast|cytosol|endoplasmic reticulum|endosome|extracellular region|Golgi stack|membrane|multivesicular body|plasma membrane|plasmodesma|trans-Golgi network|peptidyl-prolyl cis-trans isomerase activity|unfolded protein binding|protein folding|root development
LOC115702234	84.2914	41.7164	126.867	3.01997	1.59454	0.000364363	0.00423327	Up	3.06323	1.76304	2.9045	1.81582	1.09375	0.40732	0.560709	1.06113	UGT91C1	At5g49690	GeneID:115702234	UDP-glycosyltransferase 91C1-like	GO:0005829,GO:0043231,GO:0080043,GO:0080044,GO:0008194	cytosol|intracellular membrane-bounded organelle|quercetin 3-O-glucosyltransferase activity|quercetin 7-O-glucosyltransferase activity|UDP-glycosyltransferase activity
LOC115702252	63.5075	88.5079	38.507	0.443082	-1.17435	0.00103826	0.00972671	Down	0.629298	0.770743	1.04562	0.765606	2.60948	1.7643	1.39581	1.60357	UGT91C1	At5g49690	GeneID:115702252	UDP-glycosyltransferase 91C1-like	GO:0005829,GO:0043231,GO:0080043,GO:0080044,GO:0008194	cytosol|intracellular membrane-bounded organelle|quercetin 3-O-glucosyltransferase activity|quercetin 7-O-glucosyltransferase activity|UDP-glycosyltransferase activity
LOC115702281	51.8202	95.6085	8.03177	0.0889439	-3.49096	3.22e-06	7.27e-05	Down	0.0444163	0.0336059	0.0717817	0.0662754	0.0653244	0.802803	1.21252	0.542333	ABCG39	At1g66950	GeneID:115702281	pleiotropic drug resistance protein 2-like	GO:0016021,GO:0005886,GO:0005524,GO:0042626,GO:0006855,GO:0000302,GO:0055085	integral component of membrane|plasma membrane|ATP binding|ATPase activity, coupled to transmembrane movement of substances|drug transmembrane transport|response to reactive oxygen species|transmembrane transport
LOC115702282	155.292	274.572	36.0119	0.133152	-2.90886	1.62e-05	0.000298264	Down	0.989419	1.17905	0.783516	0.822059	0.848848	12.7174	10.3719	5.41911	RLPH2	At3g09970	GeneID:115702282	tyrosine-protein phosphatase RLPH2-like
LOC115702283	95.1074	164.629	25.5853	0.158733	-2.65533	5.97e-05	0.000913596	Down	0.820663	0.47416	0.478266	0.920938	0.824969	6.52165	7.68499	2.66306	RLPH2	At3g09970	GeneID:115702283	tyrosine-protein phosphatase RLPH2-like
LOC115702290	19.5881	7.09698	32.0793	4.88334	2.28787	0.00318011	0.0234991	Up	1.83143	0.850856	0.65427	1.03731	0.0367539	0.258693	0.21051	0.473488	AP2-1		GeneID:115702290	AP2/ERF transcription factor
LOC115702306	13.299	0.780768	25.8172	33.613	5.07095	2.55e-05	0.000439109	Up	0.740185	0.16083	0.622649	0.558666	0.0217102	0	0.0414487	0			GeneID:115702306	uncharacterized protein LOC115702306
LOC115702322	6094.6	8868.36	3320.83	0.375562	-1.41288	1.01e-09	4.82e-08	Down	94.6074	74.3443	91.6122	92.141	191.315	320.776	277.428	161.036	PSBS		GeneID:115702322	photosystem II 22 kDa protein, chloroplastic	GO:0009535,GO:0016021,GO:0009523,GO:0042802,GO:0051219,GO:0015979	chloroplast thylakoid membrane|integral component of membrane|photosystem II|identical protein binding|phosphoprotein binding|photosynthesis	ko00195	Photosynthesis
LOC115702327	10.1887	20.3775	0	0.00895402	-6.80325	0.00271244	0.0209038	Down	0	0	0	0	0	0.25675	0.312305	0.0479722		At1g65750	GeneID:115702327	uncharacterized protein LOC115702327	GO:0046872,GO:0003676,GO:0004523	metal ion binding|nucleic acid binding|RNA-DNA hybrid ribonuclease activity
LOC115702330	421.846	568.317	275.375	0.484827	-1.04446	1.4e-06	3.48e-05	Down	4.35447	4.48879	5.64333	4.99023	11.1263	8.75048	12.5886	7.91671			GeneID:115702330	uncharacterized protein LOC115702330 isoform X1
LOC115702336	10240.7	5556.23	14925.3	2.70486	1.43556	3.65e-22	6e-20	Up	367.965	325.072	413.016	306.802	108.987	119.208	150.149	150.803	CHI2		GeneID:115702336	endochitinase 2	GO:0008061,GO:0004568,GO:0016998,GO:0006032,GO:0006952,GO:0000272	chitin binding|chitinase activity|cell wall macromolecule catabolic process|chitin catabolic process|defense response|polysaccharide catabolic process	ko00520,ko04016	Amino sugar and nucleotide sugar metabolism|MAPK signaling pathway - plant
LOC115702338	212.265	323.911	100.619	0.314368	-1.66947	0.00161631	0.0139699	Down	1.56848	2.27456	1.71102	2.39358	11.3418	1.73963	5.72943	6.659	BHLH80	At1g35460	GeneID:115702338	transcription factor bHLH80	GO:0005634,GO:0003677,GO:0001228,GO:0003700,GO:0046983,GO:0042335,GO:0006355	nucleus|DNA binding|DNA-binding transcription activator activity, RNA polymerase II-specific|DNA-binding transcription factor activity|protein dimerization activity|cuticle development|regulation of transcription, DNA-templated
LOC115702367	1138.28	1975.81	300.756	0.118537	-3.07659	1.16e-08	4.74e-07	Down	3.38064	4.91431	18.6747	18.8165	42.2092	117.231	110.471	35.6505			GeneID:115702367	14 kDa proline-rich protein DC2.15-like	GO:0016021	integral component of membrane
LOC115702378	31.7565	48.5026	15.0103	0.310443	-1.6876	0.00779882	0.0468784	Down	0.607964	0.251996	0.26913	0.552189	0.937347	2.43227	0.606143	1.50619		At4g34215	GeneID:115702378	probable carbohydrate esterase At4g34215	GO:0016787	hydrolase activity
LOC115702383	39.4631	72.6635	6.26275	0.0851981	-3.55304	1.04e-08	4.24e-07	Down	0.321356	0.194514	0.623217	0.0871834	3.36091	3.96025	4.81245	2.11977	GRXS1	At1g03020	GeneID:115702383	monothiol glutaredoxin-S1-like	GO:0005737,GO:0051537,GO:0009055,GO:0046872,GO:0015035,GO:0045454	cytoplasm|2 iron, 2 sulfur cluster binding|electron transfer activity|metal ion binding|protein disulfide oxidoreductase activity|cell redox homeostasis
LOC115702418	6.16614	11.3559	0.976396	0.0871743	-3.51995	0.00108789	0.0101069	Down	0.01348	0.0142788	0.0152497	0.0127999	0.0616794	0.217066	0.220795	0.158919	NSP2	MTR_3g072710	GeneID:115702418	nodulation-signaling pathway 2 protein	GO:0005783,GO:0031965,GO:0009877	endoplasmic reticulum|nuclear membrane|nodulation
LOC115702421	46.0028	67.6491	24.3564	0.361429	-1.46822	0.00686417	0.0425933	Down	0.381464	0.320468	0.267853	0.387197	1.03823	0.892646	0.330361	1.51197			GeneID:115702421	L-ascorbate oxidase homolog	GO:0005615,GO:0005507,GO:0016491	extracellular space|copper ion binding|oxidoreductase activity
LOC115702445	110.636	199.374	21.899	0.108975	-3.19794	2.89e-07	8.62e-06	Down	1.11783	0.263127	0.983562	0.530716	8.95083	1.92859	6.37438	8.93809	SWEET9	At2g39060	GeneID:115702445	bidirectional sugar transporter SWEET9-like	GO:0030659,GO:0005887,GO:0005886,GO:0032588,GO:0012506,GO:0008515,GO:0051119,GO:0071836	cytoplasmic vesicle membrane|integral component of plasma membrane|plasma membrane|trans-Golgi network membrane|vesicle membrane|sucrose transmembrane transporter activity|sugar transmembrane transporter activity|nectar secretion
LOC115702458	5.50819	0	11.0164	51.3226	5.68152	0.000286075	0.00346961	Up	0.139866	0.370385	0.316455	0.796854	0	0	0	0			GeneID:115702458	uncharacterized protein LOC115712578
LOC115702584	27.6216	46.8234	8.41986	0.182879	-2.45104	0.00103551	0.00970569	Down	0.184856	0.269239	0.104562	0.263294	1.98241	0.744174	0.302783	1.52098			GeneID:115702584	uncharacterized protein LOC115702584
LOC115702591	48.5366	90.9686	6.10462	0.0677647	-3.88332	1.53e-06	3.75e-05	Down	0.119198	0	0.0674231	0.198072	2.43727	0.959709	1.10635	1.21496	AAE2	At2g17650	GeneID:115702591	probable acyl-activating enzyme 2	GO:0016874,GO:0006631	ligase activity|fatty acid metabolic process
LOC115702596	2278.59	1435.73	3121.45	2.19041	1.1312	0.000816145	0.00800019	Up	56.3676	79.553	33.5764	45.3854	16.5941	19.7906	37.435	26.1709	PILS7	At5g65980	GeneID:115702596	protein PIN-LIKES 7	GO:0005789,GO:0016021,GO:0009734,GO:0009733,GO:0055085	endoplasmic reticulum membrane|integral component of membrane|auxin-activated signaling pathway|response to auxin|transmembrane transport
LOC115702623	522.492	346.046	698.937	2.05804	1.04127	1.15e-06	2.89e-05	Up	14.6761	17.9356	12.1181	17.6397	5.30654	7.13049	9.32526	9.44643	SSL6	At3g51440	GeneID:115702623	protein STRICTOSIDINE SYNTHASE-LIKE 7-like	GO:0005783,GO:0016020,GO:0005773,GO:0009058,GO:0009723,GO:0009620,GO:0009753,GO:0009751,GO:0009615,GO:0009611	endoplasmic reticulum|membrane|vacuole|biosynthetic process|response to ethylene|response to fungus|response to jasmonic acid|response to salicylic acid|response to virus|response to wounding
LOC115702629	87.5369	171.881	3.19301	0.0183591	-5.76736	2.06e-28	5.21e-26	Down	0.0156569	0.0829236	0.0531371	0.0594678	3.00888	2.86336	2.18838	3.38402	PSAT2	At2g17630	GeneID:115702629	LOW QUALITY PROTEIN: phosphoserine aminotransferase 2, chloroplastic-like	GO:0009507,GO:0009570,GO:0009534,GO:0004648,GO:0006564,GO:0046686	chloroplast|chloroplast stroma|chloroplast thylakoid|O-phospho-L-serine:2-oxoglutarate aminotransferase activity|L-serine biosynthetic process|response to cadmium ion	ko00260,ko00270,ko00750	Glycine, serine and threonine metabolism|Cysteine and methionine metabolism|Vitamin B6 metabolism
LOC115702630	59.5585	107.051	12.0661	0.110299	-3.18051	4.87e-09	2.12e-07	Down	0.0463067	0.107912	0.115249	0.202263	0.752178	0.735013	0.465198	2.26556	GRIP	At5g66030	GeneID:115702630	protein GRIP-like	GO:0005802,GO:0048193,GO:0007131	trans-Golgi network|Golgi vesicle transport|reciprocal meiotic recombination
LOC115702632	36.0048	70.0747	1.93485	0.0270525	-5.2081	8.23e-12	5.34e-10	Down	0.0627814	0.0886688	0	0.0198712	1.14905	1.42015	2.07949	1.6242	SSL6	At3g51440	GeneID:115702632	protein STRICTOSIDINE SYNTHASE-LIKE 7-like	GO:0005783,GO:0016020,GO:0005773,GO:0009058,GO:0009723,GO:0009620,GO:0009753,GO:0009751,GO:0009615,GO:0009611	endoplasmic reticulum|membrane|vacuole|biosynthetic process|response to ethylene|response to fungus|response to jasmonic acid|response to salicylic acid|response to virus|response to wounding
LOC115702633	18.91	37.8201	0	0.00491175	-7.66955	6.64e-09	2.81e-07	Down	0	0	0	0	0.336537	1.12796	1.68659	0.843013	PUMP3	At1g14140	GeneID:115702633	mitochondrial uncoupling protein 3-like	GO:0016021,GO:0005743,GO:0006839,GO:0009409	integral component of membrane|mitochondrial inner membrane|mitochondrial transport|response to cold
LOC115702653	547.233	765.219	329.247	0.456183	-1.13231	0.00138489	0.0123146	Down	2.71959	4.5125	7.44413	11.7742	6.80928	4.00305	21.5562	29.9132			GeneID:115702653	uncharacterized protein LOC115702653
LOC115702681	47.9785	91.8489	4.10824	0.0450939	-4.47092	2.16e-11	1.33e-09	Down	0.0622762	0.0494748	0.0704517	0.0887009	2.4577	0.91328	0.69703	1.95783	CYP81Q32		GeneID:115702681	cytochrome P450 81Q32-like
LOC115702687	8.97526	16.9741	0.976396	0.0577944	-4.11293	4.59e-05	0.000720653	Down	0.0173737	0.0184032	0.0196545	0.0164971	0.397476	0.359698	0.151771	0.34137	CYP81Q32		GeneID:115702687	cytochrome P450 81Q32-like
LOC115702688	20.8122	41.6244	0	0.00433243	-7.85061	8.81e-06	0.00017591	Down	0	0	0	0	0.0263444	2.11915	1.53403	0.47514	SALAT		GeneID:115702688	salutaridinol 7-O-acetyltransferase-like	GO:0047180,GO:0009820	salutaridinol 7-O-acetyltransferase activity|alkaloid metabolic process	ko00940,ko00941,ko00945	Phenylpropanoid biosynthesis|Flavonoid biosynthesis|Stilbenoid, diarylheptanoid and gingerol biosynthesis
LOC115702696	215.588	424.076	7.09902	0.016936	-5.88376	7.95e-44	3.47e-41	Down	0.120633	0.182545	0.116974	0.0981829	4.25806	8.95943	10.3311	7.80501	STY17	At4g35780	GeneID:115702696	LOW QUALITY PROTEIN: serine/threonine-protein kinase STY17-like	GO:0005829,GO:0005524,GO:0004674,GO:0004712,GO:0009658	cytosol|ATP binding|protein serine/threonine kinase activity|protein serine/threonine/tyrosine kinase activity|chloroplast organization
LOC115702708	811.727	1611.07	12.3872	0.00769629	-7.02162	4.09e-57	3.57e-54	Down	0.549683	0.420518	0.345469	0.289971	21.5533	71.3733	72.0277	46.6523	SCE1	At3g57870	GeneID:115702708	SUMO-conjugating enzyme SCE1	GO:0005634,GO:0005524,GO:0019900,GO:0061656,GO:0019789,GO:0009793,GO:0016925,GO:0009737	nucleus|ATP binding|kinase binding|SUMO conjugating enzyme activity|SUMO transferase activity|embryo development ending in seed dormancy|protein sumoylation|response to abscisic acid	ko03013,ko04120	RNA transport|Ubiquitin mediated proteolysis
LOC115702710	259.573	517.445	1.70058	0.00301622	-8.37304	5.98e-34	1.95e-31	Down	0	0	0.0384262	0.0430043	3.8855	8.24352	5.67487	7.27474		At5g67200	GeneID:115702710	LOW QUALITY PROTEIN: probable inactive receptor kinase At5g67200
LOC115702711	1379.71	1950.46	808.964	0.415205	-1.2681	3.99e-27	9.69e-25	Down	5.19318	5.88003	6.06592	6.00844	14.9709	14.4941	13.7159	12.8975	KIN4A		GeneID:115702711	LOW QUALITY PROTEIN: kinesin-like protein KIN-4A	GO:0055028,GO:0005737,GO:0005524,GO:0008017,GO:0003777,GO:0071555,GO:0007018	cortical microtubule|cytoplasm|ATP binding|microtubule binding|microtubule motor activity|cell wall organization|microtubule-based movement
LOC115702716	7.32557	14.1659	0.485278	0.0328293	-4.92887	0.00665513	0.0416461	Down	0.0196935	0.0208605	0	0	0	0.566285	0.172036	0.464341		At3g50210	GeneID:115702716	probable 2-oxoglutarate-dependent dioxygenase At3g50210 isoform X1	GO:0051213,GO:0046872	dioxygenase activity|metal ion binding
LOC115702727	310.805	617.644	3.96639	0.0064433	-7.27798	2.95e-45	1.35e-42	Down	0.0494268	0.104711	0.167747	0.0938659	24.5381	11.967	11.55	16.4613	RER1A	At4g39220	GeneID:115702727	protein RER1A-like	GO:0005783,GO:0005794,GO:0030173,GO:0006621,GO:0006890	endoplasmic reticulum|Golgi apparatus|integral component of Golgi membrane|protein retention in ER lumen|retrograde vesicle-mediated transport, Golgi to ER
LOC115702732	113.314	73.9673	152.661	2.05851	1.0416	0.000111212	0.00155333	Up	2.2829	2.6972	2.78126	3.58507	1.56685	1.53507	1.30394	1.1214	CYCD3-3	At3g50070	GeneID:115702732	cyclin-D3-3-like	GO:0000307,GO:0005737,GO:0005634,GO:0016538,GO:0019901,GO:0051301,GO:0010444,GO:0000278,GO:0045787,GO:0008284,GO:0006468,GO:0000079,GO:0007088,GO:0048316	cyclin-dependent protein kinase holoenzyme complex|cytoplasm|nucleus|cyclin-dependent protein serine/threonine kinase regulator activity|protein kinase binding|cell division|guard mother cell differentiation|mitotic cell cycle|positive regulation of cell cycle|positive regulation of cell proliferation|protein phosphorylation|regulation of cyclin-dependent protein serine/threonine kinase activity|…	ko04075	Plant hormone signal transduction
LOC115702733	44.2388	88.244	0.233489	0.00336107	-8.21686	1.86e-13	1.49e-11	Down	0.0199199	0	0	0	2.14192	2.08497	1.3051	1.93742	EB1C	At5g67270	GeneID:115702733	microtubule-associated protein RP/EB family member 1C-like isoform X1	GO:0005618,GO:0005881,GO:0005874,GO:0005815,GO:0035371,GO:0005730,GO:0005634,GO:0009524,GO:0005819,GO:0051233,GO:0008017,GO:0051010,GO:0051301,GO:0030865,GO:0035372,GO:1904825,GO:0031110,GO:0051225,GO:0009652	cell wall|cytoplasmic microtubule|microtubule|microtubule organizing center|microtubule plus-end|nucleolus|nucleus|phragmoplast|spindle|spindle midzone|microtubule binding|microtubule plus-end binding|cell division|cortical cytoskeleton organization|protein localization to microtubule|protein localization to microtubule plus-end|regulation of microtubule polymerization or depolymerization|spindle…
LOC115702747	129.246	252.273	6.21968	0.0240341	-5.37878	2.71e-20	3.81e-18	Down	0.0220242	0.0933171	0.11212	0.0627388	1.13371	4.76244	3.41503	2.63975		At4g37250	GeneID:115702747	probable LRR receptor-like serine/threonine-protein kinase At4g37250	GO:0016021,GO:0005524,GO:0004674	integral component of membrane|ATP binding|protein serine/threonine kinase activity
LOC115702751	232.919	138.33	327.507	2.43452	1.28364	3.72e-05	0.000607512	Up	6.24459	8.43255	9.33339	4.73183	4.58867	2.4021	2.79978	2.31582	CAD		GeneID:115702751	probable cinnamyl alcohol dehydrogenase	GO:0045551,GO:0052747,GO:0008270,GO:0009809	cinnamyl-alcohol dehydrogenase activity|sinapyl alcohol dehydrogenase activity|zinc ion binding|lignin biosynthetic process	ko00940	Phenylpropanoid biosynthesis
LOC115702758	1384.44	846.564	1922.31	2.25773	1.17487	2.21e-08	8.49e-07	Up	29.909	25.3887	49.4711	35.2961	13.6302	15.6602	13.8174	18.8581	CYP81Q32		GeneID:115702758	cytochrome P450 81Q32-like
LOC115702775	92.6779	182.372	2.98337	0.0143203	-6.12579	9.1e-11	5.12e-09	Down	0	0	0.162172	0.0972282	7.09804	2.87368	1.96787	3.7824	TLP1	At4g24180	GeneID:115702775	thaumatin-like protein 1 isoform X1	GO:0006952,GO:0009617,GO:0009723	defense response|response to bacterium|response to ethylene
LOC115702779	6110.23	3929.42	8291.05	2.11551	1.08101	7.44e-16	7.45e-14	Up	109.954	122.732	100.243	116.423	61.388	48.6124	53.0534	50.7365	FRL3	At5g48385	GeneID:115702779	FRIGIDA-like protein 3	GO:0030154,GO:0009908	cell differentiation|flower development
LOC115702780	4366.28	6345.22	2387.34	0.377632	-1.40495	6.07e-15	5.52e-13	Down	47.6252	36.9947	43.1618	50.6824	114.082	146.38	125.12	92.0522	PETH		GeneID:115702780	ferredoxin--NADP reductase, leaf-type isozyme, chloroplastic	GO:0009570,GO:0009535,GO:0004324,GO:0015979	chloroplast stroma|chloroplast thylakoid membrane|ferredoxin-NADP+ reductase activity|photosynthesis	ko00195	Photosynthesis
LOC115702821	81.3445	53.5507	109.138	2.02172	1.01558	0.00523058	0.034771	Up	4.22929	4.00521	1.67933	3.03187	2.0505	1.2564	1.71271	1.34831		At1g60420	GeneID:115702821	uncharacterized protein LOC115702821	GO:0005829,GO:0047134,GO:0045454,GO:0009860,GO:0010183,GO:0080092,GO:0046686	cytosol|protein-disulfide reductase activity|cell redox homeostasis|pollen tube growth|pollen tube guidance|regulation of pollen tube growth|response to cadmium ion
LOC115702833	593.894	797.314	390.475	0.489643	-1.0302	1.96e-10	1.03e-08	Down	3.31517	4.03975	3.67122	3.44691	6.91406	8.76308	6.304	7.75132	FRS5	At4g38180	GeneID:115702833	LOW QUALITY PROTEIN: protein FAR1-RELATED SEQUENCE 5-like	GO:0005634,GO:0008270,GO:0006355	nucleus|zinc ion binding|regulation of transcription, DNA-templated
LOC115702841	38.3406	56.5147	20.1664	0.354143	-1.4976	0.00159621	0.0138273	Down	0.318155	0.674016	0.442981	0.650682	0.783867	2.2238	1.3362	1.58687	EXPA20	At4g38210	GeneID:115702841	expansin-A20
LOC115702842	119.733	173.466	66	0.379948	-1.39613	0.00168628	0.0144061	Down	2.59195	1.88756	0.885774	2.17916	3.39732	8.35372	4.6582	3.66047	THA8L	At3g46870	GeneID:115702842	pentatricopeptide repeat-containing protein At1g62350-like isoform X1
LOC115702892	106.467	152.473	60.4615	0.392968	-1.34752	0.00263597	0.0204541	Down	1.90501	2.15802	1.25714	1.45716	5.1452	1.76508	6.18278	4.05501	ZIM17		GeneID:115702892	uncharacterized protein LOC115702879	GO:0005743,GO:0008270,GO:0015031	mitochondrial inner membrane|zinc ion binding|protein transport
LOC115702904	288.547	413.558	163.537	0.401962	-1.31487	9.09e-06	0.000180218	Down	2.96081	2.23766	2.69089	3.63273	3.63423	8.53291	9.88086	7.48443	MO2	At4g38540	GeneID:115702904	monooxygenase 2-like isoform X1	GO:0071949,GO:0004497,GO:0002239	FAD binding|monooxygenase activity|response to oomycetes
LOC115702905	339.506	547.614	131.399	0.24002	-2.05877	1.03e-07	3.41e-06	Down	3.08942	1.71704	2.22212	3.58543	6.32627	17.9427	8.18389	12.2905	MO2	At4g38540	GeneID:115702905	monooxygenase 2-like	GO:0071949,GO:0004497,GO:0002239	FAD binding|monooxygenase activity|response to oomycetes
LOC115702915	30.7108	16.6556	44.766	2.67008	1.41688	0.000355031	0.0041521	Up	0.600107	0.916108	0.838626	0.988819	0.302851	0.385723	0.269826	0.294782	GCP1	At4g36880	GeneID:115702915	cysteine proteinase COT44-like	GO:0008234	cysteine-type peptidase activity
LOC115702949	1469.35	908.177	2030.53	2.24448	1.16638	3.12e-08	1.16e-06	Up	36.047	36.7302	24.1505	31.298	19.0653	12.0885	11.9485	14.2944	WSD1	At5g37300	GeneID:115702949	O-acyltransferase WSD1-like isoform X1	GO:0005783,GO:0005789,GO:0016021,GO:0005886,GO:0102966,GO:0004144,GO:0047196,GO:0103095,GO:0019432,GO:0010025	endoplasmic reticulum|endoplasmic reticulum membrane|integral component of membrane|plasma membrane|arachidoyl-CoA:1-dodecanol O-acyltransferase activity|diacylglycerol O-acyltransferase activity|long-chain-alcohol O-fatty-acyltransferase activity|wax ester synthase activity|triglyceride biosynthetic process|wax biosynthetic process
LOC115702961	3435.82	5283.31	1588.33	0.295839	-1.75711	1.14e-10	6.28e-09	Down	29.4206	27.5038	20.2046	18.6601	50.8962	120.36	72.2177	78.3154	RD21A	At1g47128	GeneID:115702961	cysteine proteinase RD21A-like	GO:0048046,GO:0009507,GO:0010494,GO:0005615,GO:0005794,GO:0005764,GO:0000932,GO:0009506,GO:0005773,GO:0004197,GO:0008234,GO:0008233,GO:0050832,GO:0006508,GO:0051603	apoplast|chloroplast|cytoplasmic stress granule|extracellular space|Golgi apparatus|lysosome|P-body|plasmodesma|vacuole|cysteine-type endopeptidase activity|cysteine-type peptidase activity|peptidase activity|defense response to fungus|proteolysis|proteolysis involved in cellular protein catabolic process
LOC115702966	32.5253	0	65.0506	345.29	8.43167	1.07e-13	8.68e-12	Up	4.53851	3.22692	4.78266	4.60469	0	0	0	0	EXO1	At1g29630	GeneID:115702966	exonuclease 1-like	GO:0005634,GO:0017108,GO:0003677,GO:0051908,GO:0048256,GO:0046872,GO:0045145,GO:0006281	nucleus|5'-flap endonuclease activity|DNA binding|double-stranded DNA 5'-3' exodeoxyribonuclease activity|flap endonuclease activity|metal ion binding|single-stranded DNA 5'-3' exodeoxyribonuclease activity|DNA repair	ko03430	Mismatch repair
LOC115702971	1569.65	855.399	2283.91	2.69374	1.42961	1.58e-08	6.28e-07	Up	26.2938	28.9442	24.9909	28.2025	14.6542	6.79374	8.9097	10.2183	PTEN2A	At3g19420	GeneID:115702971	phosphatidylinositol 3,4,5-trisphosphate 3-phosphatase and protein-tyrosine-phosphatase PTEN2A-like	GO:0005829,GO:0070300,GO:0052866,GO:0016314,GO:0004725,GO:0008138,GO:0035335,GO:0046856,GO:0006970,GO:0009651	cytosol|phosphatidic acid binding|phosphatidylinositol phosphate phosphatase activity|phosphatidylinositol-3,4,5-trisphosphate 3-phosphatase activity|protein tyrosine phosphatase activity|protein tyrosine/serine/threonine phosphatase activity|peptidyl-tyrosine dephosphorylation|phosphatidylinositol dephosphorylation|response to osmotic stress|response to salt stress	ko00562,ko04070	Inositol phosphate metabolism|Phosphatidylinositol signaling system
LOC115702972	817.831	476.029	1159.63	2.46304	1.30044	3.24e-05	0.000538141	Up	14.4278	17.286	17.3703	12.5106	9.72762	3.45726	5.82591	6.18898	PGDH1	At4g34200	GeneID:115702972	D-3-phosphoglycerate dehydrogenase 1, chloroplastic-like	GO:0009507,GO:0009570,GO:0016020,GO:0005739,GO:0009536,GO:0005524,GO:0051287,GO:0004617,GO:0009793,GO:0006564,GO:0009561,GO:0009555	chloroplast|chloroplast stroma|membrane|mitochondrion|plastid|ATP binding|NAD binding|phosphoglycerate dehydrogenase activity|embryo development ending in seed dormancy|L-serine biosynthetic process|megagametogenesis|pollen development	ko00260,ko00270	Glycine, serine and threonine metabolism|Cysteine and methionine metabolism
LOC115703005	513.436	702.244	324.627	0.462106	-1.1137	2.06e-05	0.000365906	Down	4.56451	3.66977	4.26258	4.89849	6.88466	14.2669	8.7259	8.12396	NHD1	At3g19490	GeneID:115703005	sodium/proton antiporter 2-like	GO:0009941,GO:0031969,GO:0016021,GO:0015297,GO:0050833,GO:0006848,GO:0009651,GO:0006814	chloroplast envelope|chloroplast membrane|integral component of membrane|antiporter activity|pyruvate transmembrane transporter activity|pyruvate transport|response to salt stress|sodium ion transport
LOC115703007	62.6391	102.398	22.88	0.230049	-2.11998	0.000379059	0.00436441	Down	0.214195	0.165009	0.297385	0.268101	0.701641	2.29568	0.861146	0.420864		At4g34220	GeneID:115703007	probable LRR receptor-like serine/threonine-protein kinase At4g37250
LOC115703025	1813.28	2717.77	908.803	0.334314	-1.58072	9.23e-08	3.11e-06	Down	24.3428	33.9359	26.0508	23.4069	46.6977	120.975	91.9654	66.6602	SN1		GeneID:115703025	peamaclein-like	GO:0005618,GO:0005576,GO:0006952	cell wall|extracellular region|defense response
LOC115703026	75.0492	147.857	2.24132	0.0140641	-6.15184	1.62e-05	0.000297486	Down	0.215786	0.0571431	0.244114	0	0	18.987	7.71685	7.79081		At3g19508	GeneID:115703026	LYR motif-containing protein At3g19508-like
LOC115703032	239.622	344.685	134.559	0.411694	-1.28036	0.00587916	0.0380807	Down	2.2238	2.14438	2.46369	1.92228	5.36831	2.2932	3.44985	11.3154	GT7		GeneID:115703032	UDP-glucose flavonoid 3-O-glucosyltransferase 7-like	GO:0102360,GO:0047893,GO:0102425	daphnetin 3-O-glucosyltransferase activity|flavonol 3-O-glucosyltransferase activity|myricetin 3-O-glucosyltransferase activity	ko00940	Phenylpropanoid biosynthesis
LOC115703040	517.367	765.112	269.623	0.360499	-1.47193	0.00441288	0.0304415	Down	4.72965	3.46955	3.19436	4.73232	5.6848	7.63228	27.4416	5.77006	EGY3	At1g17870	GeneID:115703040	probable zinc metallopeptidase EGY3, chloroplastic	GO:0031969,GO:0016021,GO:0008237,GO:0009408,GO:0009644,GO:0042542	chloroplast membrane|integral component of membrane|metallopeptidase activity|response to heat|response to high light intensity|response to hydrogen peroxide
LOC115703052	900.58	1244.19	556.969	0.455792	-1.13355	0.000635758	0.00656084	Down	32.6532	32.7737	29.9758	30.9548	37.4133	66.988	125.205	56.5863		At2g23090	GeneID:115703052	uncharacterized protein At2g23090-like
LOC115703085	53.3078	106.616	0	0.00168859	-9.20997	0.00623231	0.0398043	Down	0	0	0	0	0	6.56436	5.10718	1.20343	SALAT		GeneID:115703085	salutaridinol 7-O-acetyltransferase-like	GO:0047180,GO:0009820	salutaridinol 7-O-acetyltransferase activity|alkaloid metabolic process	ko00940,ko00941,ko00945	Phenylpropanoid biosynthesis|Flavonoid biosynthesis|Stilbenoid, diarylheptanoid and gingerol biosynthesis
LOC115703097	174.169	235.643	112.694	0.481501	-1.05439	1.39e-05	0.000261044	Down	3.70715	2.49406	2.40861	3.35361	6.21765	7.80764	6.12678	5.02009	GRXC13	At2g47880	GeneID:115703097	glutaredoxin-C13	GO:0005737,GO:0005634,GO:0009055,GO:0015035,GO:0045454,GO:0006995	cytoplasm|nucleus|electron transfer activity|protein disulfide oxidoreductase activity|cell redox homeostasis|cellular response to nitrogen starvation
LOC115703125	500.928	326.53	675.326	2.04264	1.03043	0.00403845	0.0285036	Up	16.2525	13.4606	39.0493	17.4864	9.17538	11.8865	8.00423	12.75	ERF003	At5g25190	GeneID:115703125	ethylene-responsive transcription factor ERF003-like	GO:0005634,GO:0003677,GO:0003700,GO:0009873	nucleus|DNA binding|DNA-binding transcription factor activity|ethylene-activated signaling pathway
LOC115703128	151.205	201.989	100.421	0.497034	-1.00858	1.71e-05	0.000310895	Down	4.2781	2.45043	3.40573	3.37016	5.94498	7.58146	7.23219	6.56906			GeneID:115703128	uncharacterized protein LOC115703128 isoform X1
LOC115703173	62.3753	88.9886	35.762	0.370269	-1.43336	0.00424505	0.0296567	Down	0.853956	0.975504	0.47356	0.238491	1.70468	0.943699	1.84668	1.84241	UGT72B1	At4g01070	GeneID:115703173	UDP-glycosyltransferase 72B1-like	GO:0043231,GO:0050505,GO:0080043,GO:0080044,GO:0035251,GO:0008194,GO:0009809,GO:0009651,GO:0009636,GO:0042178,GO:0006805	intracellular membrane-bounded organelle|hydroquinone glucosyltransferase activity|quercetin 3-O-glucosyltransferase activity|quercetin 7-O-glucosyltransferase activity|UDP-glucosyltransferase activity|UDP-glycosyltransferase activity|lignin biosynthetic process|response to salt stress|response to toxic substance|xenobiotic catabolic process|xenobiotic metabolic process
LOC115703182	9295.94	12334.9	6256.97	0.464496	-1.10626	5.54e-05	0.00085415	Down	63.0704	58.1947	108.162	173.36	145.791	197.349	285.873	175.161	AOS3	Solyc10g007960	GeneID:115703182	allene oxide synthase 3-like	GO:0046423,GO:0020037,GO:0047987,GO:0005506,GO:0016705,GO:0006952,GO:0055114,GO:0031408,GO:0016125	allene-oxide cyclase activity|heme binding|hydroperoxide dehydratase activity|iron ion binding|oxidoreductase activity, acting on paired donors, with incorporation or reduction of molecular oxygen|defense response|oxidation-reduction process|oxylipin biosynthetic process|sterol metabolic process	ko00592	alpha-Linolenic acid metabolism
LOC115703210	16.3231	32.6462	0	0.0059319	-7.39729	0.000953152	0.00908	Down	0	0	0	0	0	1.08507	3.53186	0.1655			GeneID:115703210	uncharacterized protein LOC115699843
LOC115703246	251.622	349.058	154.187	0.44148	-1.17958	4.77e-06	0.000102759	Down	5.22542	6.87419	9.01013	6.4423	18.7516	15.3165	12.3322	16.0633	GASA9	At1g22690	GeneID:115703246	gibberellin-regulated protein 9	GO:0005576,GO:0009740	extracellular region|gibberellic acid mediated signaling pathway
LOC115703561	124.417	186.945	61.8882	0.334122	-1.58155	1.17e-05	0.000222769	Down	1.23675	0.848545	0.667756	0.93414	4.03516	2.58637	1.54998	2.94091	CBSPPR1	At5g10690	GeneID:115703561	LOW QUALITY PROTEIN: pentatricopeptide repeat-containing protein At5g10690-like
LOC115703568	102.279	204.324	0.233489	0.00154618	-9.33707	3.28e-09	1.45e-07	Down	0.0434615	0	0	0	0.0497157	8.59816	22.9223	6.91708	MBF1C	At3g24500	GeneID:115703568	multiprotein-bridging factor 1c-like	GO:0005737,GO:0005730,GO:0003700,GO:0043565,GO:0003713,GO:0009873,GO:0045893,GO:0009737,GO:0009408,GO:0009414	cytoplasm|nucleolus|DNA-binding transcription factor activity|sequence-specific DNA binding|transcription coactivator activity|ethylene-activated signaling pathway|positive regulation of transcription, DNA-templated|response to abscisic acid|response to heat|response to water deprivation
LOC115703570	191.041	379.576	2.5055	0.00636328	-7.29601	3.74e-40	1.5e-37	Down	0.067548	0.214652	0.0764156	0	11.7061	16.2379	15.047	11.7791	RPS15AE	At4g29430	GeneID:115703570	40S ribosomal protein S15a-5-like	GO:0022626,GO:0022627,GO:0005739,GO:0042788,GO:0005773,GO:0003735,GO:0006412	cytosolic ribosome|cytosolic small ribosomal subunit|mitochondrion|polysomal ribosome|vacuole|structural constituent of ribosome|translation	ko03010	Ribosome
LOC115703574	339.648	220.183	459.112	2.08709	1.06149	4.15e-05	0.000664392	Up	7.34932	6.73098	10.5833	6.61282	4.25852	3.89436	2.68089	4.17764	COAC2	At4g26180	GeneID:115703574	mitochondrial carrier protein CoAc2-like	GO:0016021,GO:0005743,GO:0005739,GO:0015228,GO:1990559	integral component of membrane|mitochondrial inner membrane|mitochondrion|coenzyme A transmembrane transporter activity|mitochondrial coenzyme A transmembrane transport
LOC115703582	789.619	453.659	1125.58	2.46503	1.3016	2.39e-08	9.15e-07	Up	27.4294	29.8467	24.6502	20.0412	8.25955	12.4084	13.4829	7.32452			GeneID:115703582	putative anthocyanidin reductase	GO:0050662,GO:0016491,GO:0009813	coenzyme binding|oxidoreductase activity|flavonoid biosynthetic process
LOC115703591	245.762	160.919	330.604	2.05724	1.04071	2.07e-07	6.39e-06	Up	9.6381	9.27382	6.70757	9.70282	4.38692	4.73029	3.91221	4.26343	CNX3	At1g01290	GeneID:115703591	cyclic pyranopterin monophosphate synthase, mitochondrial	GO:0009507,GO:0005759,GO:0005739,GO:0061799,GO:0006777	chloroplast|mitochondrial matrix|mitochondrion|cyclic pyranopterin monophosphate synthase activity|Mo-molybdopterin cofactor biosynthetic process	ko00790,ko04122	Folate biosynthesis|Sulfur relay system
LOC115703598	310.394	441.436	179.353	0.406227	-1.29964	1.96e-17	2.34e-15	Down	5.14523	4.34935	5.18987	4.59681	12.6121	11.2238	11.0984	12.6744	TYRAAT1	At5g34930	GeneID:115703598	arogenate dehydrogenase 1, chloroplastic-like	GO:0009507,GO:0033730,GO:0008977,GO:0004665,GO:0006571	chloroplast|arogenate dehydrogenase (NADP+) activity|prephenate dehydrogenase (NAD+) activity|prephenate dehydrogenase (NADP+) activity|tyrosine biosynthetic process	ko00400	Phenylalanine, tyrosine and tryptophan biosynthesis
LOC115703605	34.7966	62.3428	7.2504	0.111509	-3.16477	1.07e-05	0.000205854	Down	0.133792	0.0708602	0.605426	0.222323	3.21395	1.42346	1.71662	2.46454	CICDH	At1g65930	GeneID:115703605	hypothetical protein C1H46_018703	GO:0048046,GO:0009570,GO:0005829,GO:0005886,GO:0009506,GO:0005507,GO:0004450,GO:0000287,GO:0051287,GO:0042803,GO:0042742,GO:0006102,GO:0006739,GO:0046686,GO:0009651,GO:0010043,GO:0006099	apoplast|chloroplast stroma|cytosol|plasma membrane|plasmodesma|copper ion binding|isocitrate dehydrogenase (NADP+) activity|magnesium ion binding|NAD binding|protein homodimerization activity|defense response to bacterium|isocitrate metabolic process|NADP metabolic process|response to cadmium ion|response to salt stress|response to zinc ion|tricarboxylic acid cycle	ko00020,ko00480,ko04146	Citrate cycle (TCA cycle)|Glutathione metabolism|Peroxisome
LOC115703623	687.946	1338.91	36.9817	0.028195	-5.14842	3.67e-64	3.7e-61	Down	0.425325	0.653993	0.388033	0.677451	10.0445	20.3889	27.8513	20.5557	WSD1	At5g37300	GeneID:115703623	O-acyltransferase WSD1-like	GO:0005783,GO:0005789,GO:0016021,GO:0005886,GO:0102966,GO:0004144,GO:0047196,GO:0103095,GO:0019432,GO:0010025	endoplasmic reticulum|endoplasmic reticulum membrane|integral component of membrane|plasma membrane|arachidoyl-CoA:1-dodecanol O-acyltransferase activity|diacylglycerol O-acyltransferase activity|long-chain-alcohol O-fatty-acyltransferase activity|wax ester synthase activity|triglyceride biosynthetic process|wax biosynthetic process
LOC115703633	232.272	102.768	361.777	3.52817	1.81892	7.72e-16	7.68e-14	Up	3.13573	2.57889	3.1203	2.98483	0.881318	0.620317	0.782407	1.08239	EIX2	Solyc07g00863011	GeneID:115703633	receptor-like protein EIX1 isoform X1	GO:0016021,GO:0005886,GO:0050832	integral component of membrane|plasma membrane|defense response to fungus
LOC115703637	113.259	70.4855	156.033	2.25055	1.17028	8.34e-05	0.00121188	Up	1.95321	1.72625	1.72161	2.5146	1.1377	0.964789	0.850514	0.63571	KU80	At1g48050	GeneID:115703637	ATP-dependent DNA helicase 2 subunit KU80-like	GO:0005737,GO:0043564,GO:0000784,GO:0005524,GO:0004003,GO:0003684,GO:0003690,GO:0042162,GO:0071480,GO:0071481,GO:0015074,GO:0006310,GO:0006281,GO:0006302,GO:0006303,GO:0009408,GO:0000723	cytoplasm|Ku70:Ku80 complex|nuclear chromosome, telomeric region|ATP binding|ATP-dependent DNA helicase activity|damaged DNA binding|double-stranded DNA binding|telomeric DNA binding|cellular response to gamma radiation|cellular response to X-ray|DNA integration|DNA recombination|DNA repair|double-strand break repair|double-strand break repair via nonhomologous end joining|response to heat|telome…	ko03450	Non-homologous end-joining
LOC115703641	28.0221	45.8128	10.2314	0.220711	-2.17977	0.00776155	0.0466982	Down	0.169076	0.140717	0.122961	0.09174	0.911772	0.111126	0.237374	1.06782	IOS1	At1g51800	GeneID:115703641	LRR receptor-like serine/threonine-protein kinase IOS1	GO:0016021,GO:0005886,GO:0090406,GO:0005524,GO:0042802,GO:0042803,GO:0004674,GO:0009738,GO:0002229,GO:0009788,GO:1902289,GO:1900426,GO:2000071,GO:1900150,GO:0010200,GO:0009620,GO:0002237,GO:0002238,GO:0002239	integral component of membrane|plasma membrane|pollen tube|ATP binding|identical protein binding|protein homodimerization activity|protein serine/threonine kinase activity|abscisic acid-activated signaling pathway|defense response to oomycetes|negative regulation of abscisic acid-activated signaling pathway|negative regulation of defense response to oomycetes|positive regulation of defense respon…
LOC115703643	149.01	235.87	62.1504	0.263258	-1.92545	7.71e-13	5.67e-11	Down	0.929006	0.783909	1.19347	1.24097	4.10667	4.88993	3.42157	3.40323	AERO1	At1g72280	GeneID:115703643	endoplasmic reticulum oxidoreductin-1-like	GO:0005783,GO:0005789,GO:0016671,GO:0003756,GO:0015035,GO:0034975	endoplasmic reticulum|endoplasmic reticulum membrane|oxidoreductase activity, acting on a sulfur group of donors, disulfide as acceptor|protein disulfide isomerase activity|protein disulfide oxidoreductase activity|protein folding in endoplasmic reticulum	ko04141	Protein processing in endoplasmic reticulum
LOC115703650	287.173	494.723	79.6234	0.27059	-1.88582	0.00301276	0.0225185	Down	1.9424	2.95206	2.1337	2.45919	3.8642	4.11212	4.85683	46.5454	FLZ17	At1g53885	GeneID:115703650	FCS-Like Zinc finger 17-like	GO:0005737,GO:0005829,GO:0005634,GO:0046872,GO:0009737,GO:0034097,GO:0009749,GO:1905582,GO:1902074,GO:0042594,GO:0009744	cytoplasm|cytosol|nucleus|metal ion binding|response to abscisic acid|response to cytokine|response to glucose|response to mannose|response to salt|response to starvation|response to sucrose
LOC115703666	190.287	108.771	271.803	2.48894	1.31553	3.9e-08	1.41e-06	Up	6.30089	8.67413	5.84141	5.37819	2.4459	2.32854	3.00548	2.77106	KPI106	MTR_8g059790	GeneID:115703666	endogenous alpha-amylase/subtilisin inhibitor	GO:0015066,GO:0004867	alpha-amylase inhibitor activity|serine-type endopeptidase inhibitor activity
LOC115703681	372.436	568.111	176.76	0.311393	-1.68319	0.000117469	0.00163123	Down	5.27304	5.09507	3.43367	5.44662	6.35549	29.1121	14.128	13.2416	RLP27	At2g33060	GeneID:115703681	probable LRR receptor-like serine/threonine-protein kinase At4g36180	GO:0016021,GO:0005886	integral component of membrane|plasma membrane
LOC115703767	8.48306	15.7317	1.23445	0.0862149	-3.53592	0.00258072	0.0201148	Down	0.0346606	0.0367144	0.0196054	0	0.158593	0.0597997	0.454175	0.493749	COMT1		GeneID:115703767	caffeic acid 3-O-methyltransferase-like	GO:0047763,GO:0046983,GO:0009809	caffeate O-methyltransferase activity|protein dimerization activity|lignin biosynthetic process	ko00940	Phenylpropanoid biosynthesis
LOC115703790	191.715	303.994	79.4365	0.261715	-1.93393	1.52e-12	1.07e-10	Down	1.24649	0.909297	0.971123	0.837449	3.40323	2.71863	4.84093	4.28606	NGA2	At3g61970	GeneID:115703790	B3 domain-containing protein Os03g0120900-like	GO:0005634,GO:0003677,GO:0003700,GO:0009908,GO:0048366,GO:1901371	nucleus|DNA binding|DNA-binding transcription factor activity|flower development|leaf development|regulation of leaf morphogenesis
LOC115703793	7.36217	0	14.7243	76.9387	6.26564	1.44e-05	0.000269524	Up	0.549078	0.484679	1.08703	0.738613	0	0	0	0			GeneID:115703793	uncharacterized protein LOC115703793
LOC115703802	35.016	48.8829	21.1492	0.432302	-1.20989	0.00299501	0.0224334	Down	0.408124	0.635748	0.488861	0.615492	1.5928	0.938847	1.10103	1.34438			GeneID:115703802	uncharacterized protein LOC115704784 isoform X1
LOC115703820	28.5718	40.1376	17.006	0.418423	-1.25697	0.00732619	0.0447233	Down	0.623416	0.689069	0.306634	0.334587	1.79832	0.748227	1.09511	0.95864			GeneID:115703820	uncharacterized protein LOC115703820
LOC115703822	331.31	452.015	210.606	0.468652	-1.09341	6.26e-07	1.7e-05	Down	6.96613	4.95771	5.57185	6.79551	14.194	15.5867	10.0432	12.5112	UGT76F1	At3g55700	GeneID:115703822	UDP-glycosyltransferase 76F1-like, partial	GO:0043231,GO:0080043,GO:0080044,GO:0008194	intracellular membrane-bounded organelle|quercetin 3-O-glucosyltransferase activity|quercetin 7-O-glucosyltransferase activity|UDP-glycosyltransferase activity
LOC115703851	7.16245	14.0977	0.227224	0.0221534	-5.49633	0.00445947	0.0306968	Down	0	0	0	0.0152634	0	0.332798	0.491474	0.157921	Tf2-12		GeneID:115703851	uncharacterized protein LOC115703851	GO:0005634,GO:0004190,GO:0003677,GO:0003887,GO:0004519,GO:0046872,GO:0003723,GO:0003964,GO:0015074,GO:0006310	nucleus|aspartic-type endopeptidase activity|DNA binding|DNA-directed DNA polymerase activity|endonuclease activity|metal ion binding|RNA binding|RNA-directed DNA polymerase activity|DNA integration|DNA recombination
LOC115703861	776.703	19.2732	1534.13	80.0278	6.32243	1.8e-207	1.73e-203	Up	22.8756	23.1912	22.8006	22.334	0.369008	0.241982	0.26036	0.275583	ITN1	At3g12360	GeneID:115703861	ankyrin repeat-containing protein ITN1-like	GO:0016021,GO:0016020,GO:0005634,GO:0005886,GO:0034613,GO:0009651	integral component of membrane|membrane|nucleus|plasma membrane|cellular protein localization|response to salt stress
LOC115703871	1895.12	663.133	3127.11	4.70299	2.23358	1.24e-134	7.96e-131	Up	88.3096	80.8605	78.2048	70.189	17.5849	16.6902	16.0804	17.2434	TON1B	At3g55005	GeneID:115703871	LOW QUALITY PROTEIN: protein TONNEAU 1a-like	GO:0030981,GO:0005737,GO:0005886,GO:0030865,GO:0000226,GO:0000913	cortical microtubule cytoskeleton|cytoplasm|plasma membrane|cortical cytoskeleton organization|microtubule cytoskeleton organization|preprophase band assembly
LOC115703872	211.853	321.921	101.785	0.317571	-1.65485	1.83e-07	5.77e-06	Down	2.6662	2.18875	1.96054	2.76374	9.50542	7.56441	4.41559	8.84034	CXE1		GeneID:115703872	carboxylesterase 1-like	GO:0052689	carboxylic ester hydrolase activity
LOC115703892	12.5084	0	25.0167	125.461	6.97109	0.00236419	0.0187776	Up	1.9864	0	2.20131	0.153973	0	0	0	0	LIMYB	At5g05800	GeneID:115703892	L10-interacting MYB domain-containing protein-like	GO:0005634	nucleus
LOC115703899	186.023	364.737	7.30951	0.0199633	-5.64651	7.02e-25	1.38e-22	Down	0.45606	0.128823	0.0687908	0.288699	15.8941	5.97997	13.2136	11.9181	CLPP3	At1g66670	GeneID:115703899	ATP-dependent Clp protease proteolytic subunit 3, chloroplastic-like	GO:0009507,GO:0009941,GO:0009570,GO:0009534,GO:0009840,GO:0009532,GO:0004252	chloroplast|chloroplast envelope|chloroplast stroma|chloroplast thylakoid|chloroplastic endopeptidase Clp complex|plastid stroma|serine-type endopeptidase activity
LOC115703909	15.8727	31.248	0.497382	0.0150378	-6.05526	0.00806672	0.0481272	Down	0.0472376	0	0.0534389	0	0	4.1836	0	2.18116			GeneID:115703909	uncharacterized protein LOC115703909
LOC115703955	145.331	202.575	88.0871	0.427773	-1.22508	0.000919936	0.00880287	Down	1.34768	1.07065	1.29591	2.55936	4.43213	4.10775	2.9984	2.96246	VPYL	MTR_1g089180	GeneID:115703955	serine/threonine-protein phosphatase 6 regulatory ankyrin repeat subunit B-like	GO:0005768,GO:0005794,GO:0000139,GO:0016021,GO:0005802,GO:0008757,GO:0052546	endosome|Golgi apparatus|Golgi membrane|integral component of membrane|trans-Golgi network|S-adenosylmethionine-dependent methyltransferase activity|cell wall pectin metabolic process
LOC115704018	204.492	405.589	3.39574	0.00838358	-6.89822	7.73e-51	4.79e-48	Down	0.0790735	0.0558395	0.119272	0.12514	10.7035	12.1873	12.8078	9.91772	SOD		GeneID:115704018	Manganese/iron superoxide dismutase	GO:0005759,GO:0046872,GO:0004784,GO:0019430	mitochondrial matrix|metal ion binding|superoxide dismutase activity|removal of superoxide radicals	ko04146	Peroxisome
LOC115704023	64.0076	89.2871	38.728	0.43387	-1.20467	0.00221279	0.0178362	Down	1.00744	1.42284	0.54271	0.956604	2.11275	2.12437	1.93823	2.94565	BHLH123	At3g20640	GeneID:115704023	transcription factor bHLH114-like	GO:0005634,GO:0003677,GO:0001228,GO:0003700,GO:0046983	nucleus|DNA binding|DNA-binding transcription activator activity, RNA polymerase II-specific|DNA-binding transcription factor activity|protein dimerization activity
LOC115704035	88.1697	171.691	4.64813	0.0268178	-5.22067	1.41e-34	4.84e-32	Down	0.15029	0.0795977	0.297534	0.21406	6.40389	7.4331	6.76954	6.90262	THO6	At2g19430	GeneID:115704035	THO complex subunit 6-like	GO:0080008,GO:0005634,GO:0000347,GO:0003723,GO:0009738,GO:0031047,GO:0006397,GO:0051028,GO:0009788,GO:0010267,GO:0016567,GO:0008380	Cul4-RING E3 ubiquitin ligase complex|nucleus|THO complex|RNA binding|abscisic acid-activated signaling pathway|gene silencing by RNA|mRNA processing|mRNA transport|negative regulation of abscisic acid-activated signaling pathway|production of ta-siRNAs involved in RNA interference|protein ubiquitination|RNA splicing	ko03013	RNA transport
LOC115704050	13.5395	3.42572	23.6532	7.50619	2.90808	0.000124905	0.0017122	Up	0.316992	0.335776	0.528472	0.491102	0.0381692	0	0.09109	0.114735	NTL9	At4g35580	GeneID:115704050	uncharacterized protein LOC115704050	GO:0005789,GO:0016021,GO:0005634,GO:0005886,GO:0005516,GO:0003700,GO:0044212,GO:0071470,GO:0045892,GO:1900426,GO:0031347,GO:0006355	endoplasmic reticulum membrane|integral component of membrane|nucleus|plasma membrane|calmodulin binding|DNA-binding transcription factor activity|transcription regulatory region DNA binding|cellular response to osmotic stress|negative regulation of transcription, DNA-templated|positive regulation of defense response to bacterium|regulation of defense response|regulation of transcription, DNA-tem…
LOC115704060	334.261	580.242	88.281	0.152731	-2.71093	1.48e-26	3.43e-24	Down	0.72269	0.588237	0.800351	0.73679	4.61204	3.00995	5.81476	5.36606	EIX1	Solyc07g00862011	GeneID:115704060	receptor-like protein EIX2	GO:0016021,GO:0005886,GO:0050832	integral component of membrane|plasma membrane|defense response to fungus
LOC115704098	254.912	393.015	116.808	0.292678	-1.77261	2.41e-06	5.57e-05	Down	7.40281	4.75928	5.08288	3.98191	20.901	8.31782	20.3724	21.8183	UP3	At2g31670	GeneID:115704098	stress-response A/B barrel domain-containing protein UP3-like	GO:0009507,GO:0009570,GO:0005777	chloroplast|chloroplast stroma|peroxisome
LOC115704104	37.3926	9.82142	64.9637	6.6315	2.72933	8.44e-08	2.88e-06	Up	2.53452	2.5645	2.95284	2.37072	0.346179	0.478615	0.123922	0.631791	BRH1	At3g61460	GeneID:115704104	E3 ubiquitin-protein ligase RHA1B-like
LOC115704108	70.8183	32.5183	109.118	3.32222	1.73215	3.3e-07	9.69e-06	Up	1.9266	3.0999	2.2347	3.98299	0.809006	0.617106	0.7989	1.15003	KAI2	At4g37470	GeneID:115704108	strigolactone esterase D14-like	GO:0005829,GO:0005634,GO:0016787,GO:0009704,GO:0009640,GO:0080167	cytosol|nucleus|hydrolase activity|de-etiolation|photomorphogenesis|response to karrikin
LOC115704125	271.976	142.642	401.31	2.8774	1.52477	9.61e-07	2.48e-05	Up	7.27932	6.96665	5.59831	7.29098	1.77128	1.48725	3.80004	2.68179			GeneID:115704125	WAS/WASL-interacting protein family member 3-like
LOC115704140	159.092	213.551	104.634	0.486081	-1.04073	0.00277147	0.0212394	Down	2.12732	3.2117	1.65971	3.80778	6.34932	5.34365	4.21867	6.26983	KAI2	At4g37470	GeneID:115704140	strigolactone esterase D14-like	GO:0005829,GO:0005634,GO:0016787,GO:0009704,GO:0009640,GO:0080167	cytosol|nucleus|hydrolase activity|de-etiolation|photomorphogenesis|response to karrikin
LOC115704151	520.119	256.985	783.254	3.0367	1.6025	6.08e-11	3.47e-09	Up	13.9541	10.5181	11.0142	10.4661	4.28716	3.10183	2.79376	4.9048	AAE1	At1g20560	GeneID:115704151	probable acyl-activating enzyme 1, peroxisomal	GO:0005777,GO:0016874,GO:0006631	peroxisome|ligase activity|fatty acid metabolic process
LOC115704169	344.323	667.766	20.8811	0.0306636	-5.02733	1.9e-84	4.06e-81	Down	0.786295	0.465437	0.470922	0.329392	16.8778	16.3323	18.3337	14.2682	APRR5	At5g24470	GeneID:115704169	two-component response regulator-like PRR95	GO:0005634,GO:0000160,GO:0048511	nucleus|phosphorelay signal transduction system|rhythmic process	ko04712	Circadian rhythm - plant
LOC115704178	12.0774	24.1547	0	0.00803286	-6.95987	1.47e-07	4.76e-06	Down	0	0	0	0	0.547817	0.826248	2.03947	1.55262	GULLO6	At2g46760	GeneID:115704178	probable L-gulonolactone oxidase 6	GO:0016020,GO:0003885,GO:0071949,GO:0050105,GO:0019853	membrane|D-arabinono-1,4-lactone oxidase activity|FAD binding|L-gulonolactone oxidase activity|L-ascorbic acid biosynthetic process	ko00053	Ascorbate and aldarate metabolism
LOC115704197	414.732	741.476	87.9875	0.112321	-3.1543	5.31e-14	4.47e-12	Down	2.26047	1.34088	2.45493	5.1514	30.9257	23.3652	15.9948	24.458			GeneID:115704197	probable glutathione S-transferase	GO:0004364,GO:0009734	glutathione transferase activity|auxin-activated signaling pathway	ko00480	Glutathione metabolism
LOC115704198	116.692	191.108	42.2768	0.226243	-2.14405	4.01e-13	3.1e-11	Down	0.831854	0.742928	0.572016	0.774394	2.6681	2.6265	3.20594	4.79127	EIX2	Solyc07g00863011	GeneID:115704198	receptor-like protein EIX1 isoform X2	GO:0016021,GO:0005886,GO:0050832	integral component of membrane|plasma membrane|defense response to fungus
LOC115704222	64.4801	3.18272	125.777	42.0476	5.39395	4.27e-18	5.36e-16	Up	2.3107	2.67388	2.61405	2.74725	0.155483	0.0223342	0.0424066	0.0381531			GeneID:115704222	uncharacterized protein LOC115704222
LOC115704223	160.302	78.9413	241.664	3.07289	1.6196	2.45e-09	1.1e-07	Up	4.22246	3.16551	3.75078	4.09411	1.64971	0.95765	1.02281	1.34381			GeneID:115704223	uncharacterized protein LOC115704223
LOC115704228	23.5362	34.9191	12.1533	0.351448	-1.50862	0.00147672	0.0129737	Down	0.280085	0.319504	0.243734	0.265953	0.468262	0.867336	1.12926	0.761996		At4g29420	GeneID:115704228	F-box/LRR-repeat protein At4g29420-like
LOC115704229	249.043	381.594	116.492	0.304993	-1.71315	2.93e-30	8.41e-28	Down	1.94953	1.70666	2.20546	2.09595	5.98986	6.87529	6.80866	6.55312			GeneID:115704229	uncharacterized protein LOC115704229
LOC115704248	5.82046	0	11.6409	44.583	5.47842	0.000680681	0.00692398	Up	0.0560737	0.118793	0.539198	0.665556	0	0	0	0	MCA2	At2g17780	GeneID:115704248	protein MID1-COMPLEMENTING ACTIVITY 1-like, partial	GO:0016021,GO:0005886,GO:0005262,GO:0007166,GO:0048528	integral component of membrane|plasma membrane|calcium channel activity|cell surface receptor signaling pathway|post-embryonic root development
LOC115704261	15.1528	3.82643	26.4792	9.26132	3.21122	0.00311954	0.0231584	Up	0.851727	0.701709	0.999228	0.988475	0	0.145134	0	0.371896			GeneID:115704261	uncharacterized protein LOC115704261
LOC115704268	208.829	324.112	93.5457	0.283924	-1.81642	4.88e-07	1.38e-05	Down	1.37467	1.53276	2.14854	2.11253	3.39325	9.46601	7.66339	4.65573	NUDT20	At5g19460	GeneID:115704268	nudix hydrolase 20, chloroplastic-like	GO:0009507,GO:0044715,GO:0046872	chloroplast|8-oxo-dGDP phosphatase activity|metal ion binding
LOC115704272	60.8567	112.97	8.74378	0.0752584	-3.732	2.11e-23	3.82e-21	Down	0.084281	0.156232	0.238363	0.300107	1.63896	2.25385	2.55387	3.72602		At5g08430	GeneID:115704272	LOW QUALITY PROTEIN: uncharacterized protein At5g08430-like, partial	GO:0003677	DNA binding
LOC115704298	1381.07	2074.74	687.394	0.331951	-1.59096	4.49e-15	4.21e-13	Down	7.36755	5.8309	7.01763	6.93391	23.2802	15.9305	25.732	17.3038	STR4	At4g01050	GeneID:115704298	uncharacterized protein LOC115704298	GO:0009507,GO:0009941,GO:0009534,GO:0009535,GO:0098807,GO:0016021,GO:0042742,GO:0009772	chloroplast|chloroplast envelope|chloroplast thylakoid|chloroplast thylakoid membrane|chloroplast thylakoid membrane protein complex|integral component of membrane|defense response to bacterium|photosynthetic electron transport in photosystem II
LOC115704306	6.63888	0.265127	13.0126	40.5792	5.34267	0.000170919	0.00225447	Up	1.03272	0.492261	0.993047	0.343214	0	0.0593914	0	0	ZOG1		GeneID:115704306	zeatin O-xylosyltransferase-like	GO:0050403,GO:0050404,GO:0009690,GO:0048439,GO:0009965,GO:0045926,GO:0006486,GO:0010380,GO:0010083,GO:0010015,GO:0048316	trans-zeatin O-beta-D-glucosyltransferase activity|zeatin O-beta-D-xylosyltransferase activity|cytokinin metabolic process|flower morphogenesis|leaf morphogenesis|negative regulation of growth|protein glycosylation|regulation of chlorophyll biosynthetic process|regulation of vegetative meristem growth|root morphogenesis|seed development	ko00908	Zeatin biosynthesis
LOC115704311	1196.5	653.825	1739.17	2.6639	1.41354	0.000167714	0.00221524	Up	29.9604	30.6141	30.7788	28.7581	14.1075	4.75962	17.861	8.56294	PNSL4	At4g39710	GeneID:115704311	uncharacterized protein LOC115704311	GO:0009507,GO:0009543,GO:0009535,GO:0009579,GO:0003755	chloroplast|chloroplast thylakoid lumen|chloroplast thylakoid membrane|thylakoid|peptidyl-prolyl cis-trans isomerase activity
LOC115704312	562.955	832.859	293.052	0.350879	-1.51096	0.000424189	0.00476128	Down	6.26851	5.27736	6.42156	7.38696	8.43183	36.6607	14.3142	13.6809	PIP1-3	At1g01620	GeneID:115704312	probable aquaporin TIP4-3	GO:0009507,GO:0016021,GO:0016020,GO:0005886,GO:0009506,GO:0005773,GO:0015250,GO:0009414,GO:0006833	chloroplast|integral component of membrane|membrane|plasma membrane|plasmodesma|vacuole|water channel activity|response to water deprivation|water transport
LOC115704335	38.1446	59.168	17.1213	0.287931	-1.79621	0.0014614	0.0128626	Down	0.205755	0.192306	0.191689	0.287313	0.304587	1.43387	0.687242	0.653983	YUC2	At4g13260	GeneID:115704335	indole-3-pyruvate monooxygenase YUCCA2-like	GO:0050660,GO:0103075,GO:0004499,GO:0050661,GO:0009851	flavin adenine dinucleotide binding|indole-3-pyruvate monooxygenase activity|N,N-dimethylaniline monooxygenase activity|NADP binding|auxin biosynthetic process	ko00380	Tryptophan metabolism
LOC115704375	9.97153	19.9431	0	0.00899066	-6.79736	7.82e-07	2.06e-05	Down	0	0	0	0	0.386317	0.265777	0.562866	0.296861	SKIPA	Os02g0759800	GeneID:115704375	SNW/SKI-interacting protein A-like, partial	GO:0005634,GO:0005681,GO:0000398,GO:1901002,GO:1902584	nucleus|spliceosomal complex|mRNA splicing, via spliceosome|positive regulation of response to salt stress|positive regulation of response to water deprivation	ko03040	Spliceosome
LOC115704377	17.4493	34.6714	0.227224	0.00844158	-6.88827	1.87e-07	5.89e-06	Down	0	0	0	0.03157	0.684575	2.48568	0.762403	1.01257	SALAT		GeneID:115704377	salutaridinol 7-O-acetyltransferase-like	GO:0047180,GO:0009820	salutaridinol 7-O-acetyltransferase activity|alkaloid metabolic process	ko00940,ko00941,ko00945	Phenylpropanoid biosynthesis|Flavonoid biosynthesis|Stilbenoid, diarylheptanoid and gingerol biosynthesis
LOC115704379	3.76459	7.52917	0	0.0306293	-5.02894	0.00487489	0.0329308	Down	0	0	0	0	0.068655	0.345164	0.5243	1.00239		At5g03610	GeneID:115704379	GDSL esterase/lipase At5g03610-like	GO:0005576,GO:0016788,GO:0016042	extracellular region|hydrolase activity, acting on ester bonds|lipid catabolic process
LOC115704392	112.093	57.5929	166.592	2.8482	1.51005	1.48e-06	3.65e-05	Up	4.69317	4.69762	2.84948	2.9641	1.20669	1.04	1.38697	1.64971			GeneID:115704392	putative anthocyanidin reductase	GO:0050662,GO:0016491,GO:0009813	coenzyme binding|oxidoreductase activity|flavonoid biosynthetic process
LOC115704401	16.5023	30.5907	2.414	0.0548162	-4.18925	0.00432861	0.0300329	Down	0.349728	0.0529217	0.11304	0	0.114301	4.25242	0.109111	2.11059			GeneID:115704401	pinin-like			ko03013,ko03015	RNA transport|mRNA surveillance pathway
LOC115704418	526.937	1053.39	0.485278	0.000459448	-11.0878	1.25e-25	2.64e-23	Down	0.0128551	0.0136169	0	0	17.2783	9.10811	20.4242	10.798	NFD4	At1g31470	GeneID:115704418	protein NUCLEAR FUSION DEFECTIVE 4-like	GO:0016021,GO:0005739,GO:0000741,GO:0010197,GO:0009651	integral component of membrane|mitochondrion|karyogamy|polar nucleus fusion|response to salt stress
LOC115704422	7.85062	1.20734	14.4939	12.4051	3.63286	0.000364951	0.00423754	Up	0.331284	0.263186	0.187387	0.235926	0	0.0190521	0.0180874	0.0488196			GeneID:115704422	uncharacterized protein LOC115704422
LOC115704429	11.3542	0.740293	21.9682	27.7275	4.79324	0.0010248	0.00961939	Up	0.656727	0.0772936	0.247647	2.39043	0.041735	0	0	0.0716878			GeneID:115704429	uncharacterized protein LOC115704429
LOC115704430	22.4557	42.5971	2.31423	0.0858314	-3.54235	0.0041592	0.0291843	Down	0.0612107	0	0.242362	0	2.87078	2.00652	0.334198	0.270609	5MMP	At1g59970	GeneID:115704430	metalloendoproteinase 5-MMP-like	GO:0031225,GO:0031012,GO:0005886,GO:0004222,GO:0008270	anchored component of membrane|extracellular matrix|plasma membrane|metalloendopeptidase activity|zinc ion binding
LOC115704432	56.3184	29.4293	83.2074	2.96058	1.56588	0.00630551	0.0401034	Up	0.855704	1.11855	2.75994	1.69421	0.958015	0.60729	0.357853	0.339846	CYCB3-1	At1g16330	GeneID:115704432	putative cyclin-B3-1 isoform X1	GO:0000307,GO:0005737,GO:0005634,GO:0016538,GO:0019901,GO:0051301,GO:0000278,GO:0045787,GO:0008284,GO:0006468,GO:0000079,GO:0007088	cyclin-dependent protein kinase holoenzyme complex|cytoplasm|nucleus|cyclin-dependent protein serine/threonine kinase regulator activity|protein kinase binding|cell division|mitotic cell cycle|positive regulation of cell cycle|positive regulation of cell proliferation|protein phosphorylation|regulation of cyclin-dependent protein serine/threonine kinase activity|regulation of mitotic nuclear divi…
LOC115704435	197.949	384.433	11.4642	0.02933	-5.09148	1.58e-20	2.27e-18	Down	0.466024	0.345548	0.790805	0.663766	8.47607	36.2885	10.1267	21.9762			GeneID:115704435	transmembrane protein 258-like
LOC115704444	1140.68	1939.58	341.792	0.174268	-2.52062	1.08e-06	2.74e-05	Down	10.5204	6.40719	4.60705	7.3927	14.5006	92.6027	26.42	33.1054	SAT		GeneID:115704444	stemmadenine O-acetyltransferase-like			ko00940,ko00941,ko00945	Phenylpropanoid biosynthesis|Flavonoid biosynthesis|Stilbenoid, diarylheptanoid and gingerol biosynthesis
LOC115704463	13.0731	25.6608	0.485278	0.0191966	-5.70301	1.74e-06	4.21e-05	Down	0.00881948	0.0093421	0	0	0.141241	0.263748	0.269654	0.294595			GeneID:115704463	uncharacterized protein LOC115704463
LOC115704473	449.743	806.611	92.875	0.125709	-2.99184	1.35e-05	0.000254075	Down	1.09909	0.981269	1.91835	2.17672	0.772311	14.0142	30.2269	9.82601		At4g34880	GeneID:115704473	probable amidase At4g34880	GO:0004040,GO:0043864	amidase activity|indoleacetamide hydrolase activity	ko00330,ko00360,ko00380	Arginine and proline metabolism|Phenylalanine metabolism|Tryptophan metabolism
LOC115704474	38.9407	6.96058	70.9207	10.2466	3.35707	1.14e-10	6.28e-09	Up	1.04278	1.28867	1.21542	1.2002	0.144586	0.0545183	0.207031	0.0620885	INT4	At4g16480	GeneID:115704474	inositol transporter 4-like	GO:0005887,GO:0005886,GO:0005351,GO:0005355,GO:0008645	integral component of plasma membrane|plasma membrane|carbohydrate:proton symporter activity|glucose transmembrane transporter activity|hexose transmembrane transport
LOC115704477	589.6	352.625	826.574	2.44551	1.29014	0.000228571	0.0028785	Up	33.9435	29.6832	32.4503	32.7895	6.3942	11.0822	25.2989	12.9704	PP2A10	At1g10150	GeneID:115704477	uncharacterized protein LOC115704477	GO:0016021,GO:0030246	integral component of membrane|carbohydrate binding
LOC115704483	11.1282	1.71108	20.5453	11.7403	3.5534	0.000504393	0.00546971	Up	0.23543	0.332508	0.710233	0.993562	0.0598465	0	0	0.128497	KWL1		GeneID:115704483	uncharacterized protein LOC115704483
LOC115704488	8.5496	15.65	1.44921	0.102047	-3.2927	0.00252872	0.0197737	Down	0.0317259	0	0.0358909	0.0301252	0.0362913	0.255437	0.467686	0.311686	cca2		GeneID:115704488	uncharacterized protein LOC115704488 isoform X1	GO:0005829,GO:0005759,GO:0005739,GO:0005524,GO:0052929,GO:0052928,GO:0052927,GO:0003723,GO:0001680	cytosol|mitochondrial matrix|mitochondrion|ATP binding|ATP:3'-cytidine-cytidine-tRNA adenylyltransferase activity|CTP:3'-cytidine-tRNA cytidylyltransferase activity|CTP:tRNA cytidylyltransferase activity|RNA binding|tRNA 3'-terminal CCA addition
LOC115704491	188.722	313.118	64.3252	0.200956	-2.31505	4.49e-07	1.28e-05	Down	0.727102	0.717971	0.390365	1.50955	3.84853	5.51398	4.62922	2.4941	SDR1	At3g61220	GeneID:115704491	uncharacterized protein LOC115704491	GO:0005737,GO:0047501,GO:0006952,GO:0055114	cytoplasm|(+)-neomenthol dehydrogenase activity|defense response|oxidation-reduction process	ko00902	Monoterpenoid biosynthesis
LOC115704503	72.8328	139.673	5.99288	0.043722	-4.5155	2.78e-09	1.25e-07	Down	0.0814345	0.194085	0.18425	0.0579943	0.512342	5.05795	4.26831	2.44012	SRG1	At1g17020	GeneID:115704503	protein SRG1-like	GO:0051213,GO:0046872,GO:0016682,GO:0010150	dioxygenase activity|metal ion binding|oxidoreductase activity, acting on diphenols and related substances as donors, oxygen as acceptor|leaf senescence
LOC115704518	157.625	251.312	63.9381	0.259869	-1.94415	0.00496232	0.0333108	Down	1.82454	1.193	2.0131	1.09082	1.10796	12.5656	2.33667	8.3428			GeneID:115704518	uncharacterized protein LOC115704518
LOC115704553	246.542	120.917	372.166	3.38097	1.75744	1.74e-09	8e-08	Up	3.75408	4.66706	4.9081	4.39713	0.668572	0.982522	1.841	2.32992	CYP734A1	At2g26710	GeneID:115704553	cytochrome P450 734A1	GO:0016021,GO:0020037,GO:0005506,GO:0004497,GO:0016705,GO:0008395,GO:0010268,GO:0016131,GO:0040008,GO:0009741	integral component of membrane|heme binding|iron ion binding|monooxygenase activity|oxidoreductase activity, acting on paired donors, with incorporation or reduction of molecular oxygen|steroid hydroxylase activity|brassinosteroid homeostasis|brassinosteroid metabolic process|regulation of growth|response to brassinosteroid	ko00905	Brassinosteroid biosynthesis
LOC115704564	68.9743	112.651	25.2978	0.314923	-1.66693	0.00490102	0.0330477	Down	0.144776	0.161427	0.301704	0.209825	0.322503	0.219107	0.582435	2.53773	ACA13	At3g22910	GeneID:115704564	calcium-transporting ATPase 12, plasma membrane-type-like	GO:0005887,GO:0005524,GO:0005388,GO:0005516,GO:0046872	integral component of plasma membrane|ATP binding|calcium-transporting ATPase activity|calmodulin binding|metal ion binding
LOC115704583	617.628	871.727	363.529	0.417388	-1.26054	0.0006137	0.00640549	Down	4.42093	6.96644	7.61683	5.07304	6.87981	23.1428	16.3076	12.1857	TLP1	At4g24180	GeneID:115704583	thaumatin-like protein 1	GO:0006952,GO:0009617,GO:0009723	defense response|response to bacterium|response to ethylene
LOC115704604	59.6399	31.8749	87.4048	2.94736	1.55942	7.56e-05	0.00111833	Up	2.44255	2.9401	2.4178	2.47744	0.539756	0.574652	1.03049	1.63612		At1g61480	GeneID:115704604	G-type lectin S-receptor-like serine/threonine-protein kinase At1g61480
LOC115704614	11.8189	21.1451	2.49268	0.119409	-3.06601	8.9e-05	0.00128046	Down	0.0219805	0.0116415	0.0621653	0.0208715	0.150861	0.227538	0.204016	0.410294	SBT24	At1g62340	GeneID:115704614	subtilisin-like protease SBT2.4	GO:0005576,GO:0004252,GO:0042335	extracellular region|serine-type endopeptidase activity|cuticle development
LOC115704641	247.747	494.979	0.515683	0.00103518	-9.9159	9.37e-06	0.000185575	Down	0	0.0473735	0.0505945	0	33.0999	30.9672	0	29.4822			GeneID:115704641	uncharacterized protein LOC115704641
LOC115704667	510.377	737.051	283.702	0.403446	-1.30955	3.77e-05	0.000615208	Down	6.93776	6.67862	6.80037	6.75938	29.1853	11.0729	19.0011	11.1452			GeneID:115704667	annexin-like protein RJ4	GO:0005509,GO:0005544	calcium ion binding|calcium-dependent phospholipid binding
LOC115704680	369.153	560.895	177.411	0.337952	-1.56511	0.0055132	0.036202	Down	3.04359	4.62824	3.40091	2.96095	24.3283	4.48867	3.44581	11.5386	GLY3	At1g53580	GeneID:115704680	persulfide dioxygenase ETHE1 homolog, mitochondrial-like	GO:0005739,GO:0016788,GO:0046872,GO:0050313,GO:0009793,GO:0009960,GO:0006749,GO:0070813,GO:0009651,GO:0048316	mitochondrion|hydrolase activity, acting on ester bonds|metal ion binding|sulfur dioxygenase activity|embryo development ending in seed dormancy|endosperm development|glutathione metabolic process|hydrogen sulfide metabolic process|response to salt stress|seed development	ko00920	Sulfur metabolism
LOC115704682	50.1389	70.4763	29.8014	0.426646	-1.22889	1.76e-05	0.000318464	Down	0.589003	0.647902	0.717583	0.903459	1.24387	1.51128	1.65739	2.40365			GeneID:115704682	putative anthocyanidin reductase	GO:0050662,GO:0016491,GO:0009813	coenzyme binding|oxidoreductase activity|flavonoid biosynthetic process
LOC115704695	2229.64	1372.83	3086.44	2.26238	1.17784	1.45e-11	9.12e-10	Up	180.485	165.105	196.887	184.675	54.856	89.0325	102.971	79.8133			GeneID:115704695	uncharacterized protein LOC115704695
LOC115704700	45.7532	72.048	19.4583	0.251454	-1.99163	8.63e-06	0.0001731	Down	0.193304	0.318514	0.58315	0.673021	0.810778	2.29749	1.50102	2.02569	DOF36	At3g55370	GeneID:115704700	dof zinc finger protein DOF3.6-like	GO:0005634,GO:0003677,GO:0046872,GO:0006355	nucleus|DNA binding|metal ion binding|regulation of transcription, DNA-templated
LOC115704716	11.2231	19.7809	2.66529	0.137203	-2.86561	0.000182946	0.00238687	Down	0.0273546	0.0289756	0.0206305	0.0259744	0.177316	0.157316	0.109524	0.322489	GLR27	At2g29120	GeneID:115704716	glutamate receptor 2.7-like	GO:0016021,GO:0005886,GO:0005773,GO:0005262,GO:0008066,GO:0004970,GO:0006816,GO:0019722,GO:0071230	integral component of membrane|plasma membrane|vacuole|calcium channel activity|glutamate receptor activity|ionotropic glutamate receptor activity|calcium ion transport|calcium-mediated signaling|cellular response to amino acid stimulus
LOC115704718	130.508	188.663	72.3532	0.384539	-1.3788	7.91e-08	2.71e-06	Down	1.09073	1.55252	1.11824	1.45645	3.33367	4.29294	3.05202	3.03054	HEI10	At1g53490	GeneID:115704718	E3 ubiquitin-protein ligase CCNB1IP1 homolog isoform X1	GO:0005712,GO:0005694,GO:0046872,GO:0016740,GO:0051026,GO:0035825,GO:0051321,GO:0016567,GO:0007131	chiasma|chromosome|metal ion binding|transferase activity|chiasma assembly|homologous recombination|meiotic cell cycle|protein ubiquitination|reciprocal meiotic recombination
LOC115704722	119.079	50.7955	187.362	3.68713	1.8825	1.43e-08	5.74e-07	Up	4.30788	3.88565	2.66016	4.07266	1.31264	0.649115	0.924372	1.16432	ARG7		GeneID:115704722	uncharacterized protein LOC115704674	GO:0009733	response to auxin
LOC115704723	120.114	63.0984	177.129	2.86492	1.5185	0.000100067	0.0014204	Up	1.38084	1.01456	1.77882	1.81896	0.182606	0.734443	0.644961	0.603795	EIX2	Solyc07g00863011	GeneID:115704723	receptor-like protein EIX2 isoform X1	GO:0016021,GO:0005886,GO:0050832	integral component of membrane|plasma membrane|defense response to fungus
LOC115704732	60.9862	105.393	16.5797	0.166551	-2.58596	5.06e-11	2.94e-09	Down	0.170287	0.10021	0.22475	0.170678	0.584376	0.90315	0.981385	1.79378	NTL9	At4g35580	GeneID:115704732	NAC domain-containing protein 14-like isoform X1	GO:0005789,GO:0016021,GO:0005634,GO:0005886,GO:0005516,GO:0003700,GO:0044212,GO:0071470,GO:0045892,GO:1900426,GO:0031347,GO:0006355	endoplasmic reticulum membrane|integral component of membrane|nucleus|plasma membrane|calmodulin binding|DNA-binding transcription factor activity|transcription regulatory region DNA binding|cellular response to osmotic stress|negative regulation of transcription, DNA-templated|positive regulation of defense response to bacterium|regulation of defense response|regulation of transcription, DNA-tem…
LOC115704739	56.7058	76.0444	37.3673	0.492222	-1.02262	0.00546322	0.0359442	Down	1.00294	0.874897	1.13461	1.65259	1.45096	2.95182	1.73939	3.44864	RR4	Os01g0952500	GeneID:115704739	two-component response regulator ORR4-like	GO:0005634,GO:0009736,GO:0000160	nucleus|cytokinin-activated signaling pathway|phosphorelay signal transduction system	ko04075	Plant hormone signal transduction
LOC115704753	87.0379	44.333	129.743	2.87359	1.52285	2.58e-07	7.81e-06	Up	2.95818	3.03909	1.87486	1.92902	0.672696	1.04534	0.817281	0.84035	P85	At4g35985	GeneID:115704753	senescence/dehydration-associated protein At4g35985, chloroplastic-like	GO:0009507,GO:0005886,GO:0009409,GO:0002239,GO:0009651	chloroplast|plasma membrane|response to cold|response to oomycetes|response to salt stress
LOC115704759	113.627	20.8389	206.415	9.89647	3.30691	3.64e-34	1.23e-31	Up	5.87922	6.79648	6.1714	5.87781	0.614326	0.455152	0.802483	0.638686			GeneID:115704759	E3 ubiquitin-protein ligase RNF170-like isoform X1
LOC115704760	25.5317	48.1828	2.88055	0.0576663	-4.11613	3.37e-09	1.49e-07	Down	0.0946364	0	0.0458829	0.0256747	0.757783	0.761953	0.723373	0.531279	SYT3	At5g04220	GeneID:115704760	synaptotagmin-3-like isoform X1	GO:0005783,GO:0016021,GO:0008289,GO:0046872,GO:0006869	endoplasmic reticulum|integral component of membrane|lipid binding|metal ion binding|lipid transport
LOC115704775	179.496	260.832	98.159	0.380293	-1.39482	7.67e-08	2.65e-06	Down	0.661977	0.750584	1.36064	1.10665	1.2905	2.86331	2.76923	3.49906	IMK3	At3g56100	GeneID:115704775	LOW QUALITY PROTEIN: probable leucine-rich repeat receptor-like protein kinase IMK3	GO:0016021,GO:0005886,GO:0005524,GO:0004674	integral component of membrane|plasma membrane|ATP binding|protein serine/threonine kinase activity
LOC115704776	35.2029	15.2843	55.1214	3.53868	1.82321	1.56e-05	0.000287659	Up	0.459245	0.499606	0.996943	0.942861	0.156179	0.199868	0.135534	0.317043	GULLO6	At2g46760	GeneID:115704776	probable L-gulonolactone oxidase 6	GO:0016020,GO:0003885,GO:0071949,GO:0050105,GO:0019853	membrane|D-arabinono-1,4-lactone oxidase activity|FAD binding|L-gulonolactone oxidase activity|L-ascorbic acid biosynthetic process	ko00053	Ascorbate and aldarate metabolism
LOC115704778	483.485	217.907	749.064	3.32372	1.7328	2.7e-06	6.2e-05	Up	6.14739	4.15345	11.6285	9.93185	1.68631	3.27583	1.44547	2.92611	PLIP1	At3g61680	GeneID:115704778	phospholipase A1 PLIP1, chloroplastic	GO:0009534,GO:0009535,GO:0102549,GO:0052740,GO:0047714,GO:0052739,GO:0008970,GO:0015908,GO:0016042,GO:0019432	chloroplast thylakoid|chloroplast thylakoid membrane|1-18:1-2-16:0-monogalactosyldiacylglycerol lipase activity|1-acyl-2-lysophosphatidylserine acylhydrolase activity|galactolipase activity|phosphatidylserine 1-acylhydrolase activity|phospholipase A1 activity|fatty acid transport|lipid catabolic process|triglyceride biosynthetic process
LOC115704784	96.2432	143.57	48.9163	0.340507	-1.55424	9.71e-06	0.000191324	Down	0.68034	1.26602	1.06087	0.803151	3.3864	2.55907	1.96769	3.28775	FEN1	At5g26680	GeneID:115704784	uncharacterized protein LOC115704784 isoform X1	GO:0005739,GO:0005730,GO:0005654,GO:0017108,GO:0003677,GO:0051908,GO:0048256,GO:0000287,GO:0045145,GO:0006284,GO:0043137	mitochondrion|nucleolus|nucleoplasm|5'-flap endonuclease activity|DNA binding|double-stranded DNA 5'-3' exodeoxyribonuclease activity|flap endonuclease activity|magnesium ion binding|single-stranded DNA 5'-3' exodeoxyribonuclease activity|base-excision repair|DNA replication, removal of RNA primer
LOC115704790	180.277	37.9043	322.65	8.54078	3.09437	3.82e-26	8.44e-24	Up	5.59784	5.50717	5.18762	4.68919	0.315783	0.846722	0.653127	0.67802			GeneID:115704790	protein MCM10 homolog
LOC115704793	144.231	94.9895	193.472	2.0128	1.00921	0.00536546	0.0354345	Up	3.38903	3.91621	5.253	5.47484	1.81249	3.26525	2.59528	1.27559	RAD51		GeneID:115704793	DNA repair protein RAD51 homolog	GO:0000794,GO:0005524,GO:0008094,GO:0003690,GO:0000150,GO:0003697,GO:0070192,GO:0000730,GO:0006312,GO:1990426,GO:0007131,GO:0042148	condensed nuclear chromosome|ATP binding|DNA-dependent ATPase activity|double-stranded DNA binding|recombinase activity|single-stranded DNA binding|chromosome organization involved in meiotic cell cycle|DNA recombinase assembly|mitotic recombination|mitotic recombination-dependent replication fork processing|reciprocal meiotic recombination|strand invasion	ko03440	Homologous recombination
LOC115704796	47.8531	77.4432	18.2629	0.235362	-2.08705	4.75e-08	1.69e-06	Down	0.28586	0.444106	0.344947	0.398108	1.65678	1.18366	2.08098	1.36675	COIL	At1g13030	GeneID:115704796	coilin-like	GO:0015030,GO:0030619,GO:0030620,GO:0006396	Cajal body|U1 snRNA binding|U2 snRNA binding|RNA processing
LOC115704798	31.3826	47.7198	15.0455	0.323621	-1.62762	0.000725533	0.00727237	Down	0.417667	0.294944	0.393748	0.37456	1.85799	0.69391	1.24154	0.889048	NPF54	At3g54450	GeneID:115704798	protein NRT1/ PTR FAMILY 5.4	GO:0016021,GO:0035673,GO:1904680,GO:0015333	integral component of membrane|oligopeptide transmembrane transporter activity|peptide transmembrane transporter activity|peptide:proton symporter activity
LOC115704800	138.717	230.219	47.2151	0.194539	-2.36187	1.86e-06	4.45e-05	Down	2.07046	1.33255	1.36385	0.49772	4.94667	10.7315	8.27073	1.9311	DET2		GeneID:115704800	3-oxo-5-alpha-steroid 4-dehydrogenase 2-like	GO:0005737,GO:0016021,GO:0003865,GO:0047751,GO:0050213,GO:0016132,GO:0055114,GO:0090378,GO:0090377	cytoplasm|integral component of membrane|3-oxo-5-alpha-steroid 4-dehydrogenase activity|cholestenone 5-alpha-reductase activity|progesterone 5-alpha-reductase activity|brassinosteroid biosynthetic process|oxidation-reduction process|seed trichome elongation|seed trichome initiation
LOC115704806	49.3223	70.1659	28.4786	0.387546	-1.36756	0.00161624	0.0139699	Down	1.42197	1.23237	0.731203	0.521678	2.14415	2.19312	2.11736	3.20673			GeneID:115704806	CASP-like protein 4C1	GO:0016021,GO:0005886	integral component of membrane|plasma membrane
LOC115704812	24.7043	5.66623	43.7424	7.63827	2.93325	8.18e-06	0.000165383	Up	0.931858	0.794476	0.925631	1.55387	0.23399	0.026142	0.14891	0.133974			GeneID:115704812	28 kDa ribonucleoprotein, chloroplastic-like	GO:0009507,GO:0003723,GO:0006397	chloroplast|RNA binding|mRNA processing
LOC115704824	16.2479	1.00292	31.4929	31.558	4.97993	2.08e-05	0.000368663	Up	1.15295	1.06861	0.749977	0.875822	0	0	0.125897	0			GeneID:115704824	uncharacterized protein LOC115704824
LOC115704828	86.3567	131.827	40.8865	0.303546	-1.72001	1.41e-06	3.5e-05	Down	1.09335	1.02945	1.16816	1.96101	3.26566	4.68093	6.0026	3.19258			GeneID:115704828	uncharacterized protein LOC115704828 isoform X2
LOC115704830	81.2029	142.152	20.254	0.144241	-2.79345	1.93e-22	3.22e-20	Down	0.285003	0.238998	0.201511	0.293175	1.39915	1.68003	1.98397	2.14664	SYT3	At5g04220	GeneID:115704830	synaptotagmin-3-like isoform X1	GO:0005783,GO:0016021,GO:0008289,GO:0046872,GO:0006869	endoplasmic reticulum|integral component of membrane|lipid binding|metal ion binding|lipid transport
LOC115704832	152.926	46.8035	259.048	5.71071	2.51367	2.91e-07	8.66e-06	Up	5.69197	7.27552	10.6481	11.2625	0.327371	2.56023	1.04168	2.46797	ERF023	At1g01250	GeneID:115704832	ethylene-responsive transcription factor ERF023-like	GO:0005634,GO:0003677,GO:0003700,GO:0009873	nucleus|DNA binding|DNA-binding transcription factor activity|ethylene-activated signaling pathway
LOC115704850	36.909	56.5455	17.2724	0.297758	-1.74779	0.00363729	0.0261724	Down	0.086274	0.475209	0.37088	0.327684	1.34217	0.575546	0.979759	1.23747			GeneID:115704850	LOW QUALITY PROTEIN: uncharacterized protein LOC115704850
LOC115704852	72.169	6.33984	137.998	21.9439	4.45575	2.85e-11	1.72e-09	Up	5.3083	4.78466	3.02123	6.13622	0	0.455075	0.288022	0.161958	ATL66	At3g11110	GeneID:115704852	RING-H2 finger protein ATL66-like	GO:0016021,GO:0046872,GO:0016740,GO:0016567	integral component of membrane|metal ion binding|transferase activity|protein ubiquitination
LOC115704856	284.53	71.2653	497.795	7.05996	2.81966	1.2e-37	4.34e-35	Up	4.65421	3.625	4.52962	5.23988	0.401254	0.73804	0.663301	0.806902	AGD3	At5g13300	GeneID:115704856	LOW QUALITY PROTEIN: ADP-ribosylation factor GTPase-activating protein AGD3-like	GO:0005829,GO:0005794,GO:0005886,GO:0030140,GO:0005096,GO:0046872,GO:0035091,GO:0006897,GO:0009965,GO:0010087,GO:0009733,GO:0010051	cytosol|Golgi apparatus|plasma membrane|trans-Golgi network transport vesicle|GTPase activator activity|metal ion binding|phosphatidylinositol binding|endocytosis|leaf morphogenesis|phloem or xylem histogenesis|response to auxin|xylem and phloem pattern formation	ko04144	Endocytosis
LOC115704862	37.4863	74.7207	0.25179	0.00395311	-7.9828	6.73e-07	1.81e-05	Down	0	0.0235349	0	0	2.92279	0.0255554	1.84387	2.20463	plaa2		GeneID:115704862	exopolygalacturonase	GO:0005618,GO:0005576,GO:0047911,GO:0019863,GO:0004650,GO:0071555,GO:0045490	cell wall|extracellular region|galacturan 1,4-alpha-galacturonidase activity|IgE binding|polygalacturonase activity|cell wall organization|pectin catabolic process	ko00040	Pentose and glucuronate interconversions
LOC115704867	97.3556	168.959	25.7518	0.166162	-2.58933	2.12e-05	0.00037434	Down	0.454332	0.210549	0.192741	0.687557	1.93268	1.01248	1.50384	5.74677			GeneID:115704867	uncharacterized protein LOC115704867
LOC115704871	219.801	389.334	50.2681	0.142359	-2.8124	2.74e-05	0.000465555	Down	2.05396	0.988941	1.12659	2.45268	2.13593	9.7004	32.0114	8.56069	HSP174B	At1g54050	GeneID:115704871	17.4 kDa class III heat shock protein	GO:0005737,GO:0043621,GO:0051082,GO:0051259,GO:0006457,GO:0009408,GO:0009644,GO:0042542,GO:0000302,GO:0009651	cytoplasm|protein self-association|unfolded protein binding|protein complex oligomerization|protein folding|response to heat|response to high light intensity|response to hydrogen peroxide|response to reactive oxygen species|response to salt stress	ko04141	Protein processing in endoplasmic reticulum
LOC115704883	86.6441	147.164	26.1243	0.18893	-2.40408	3.35e-06	7.51e-05	Down	0.498231	0.568351	0.433568	0.618659	2.17011	2.44654	1.15087	6.23143	BEN1	At2g45400	GeneID:115704883	protein BRI1-5 ENHANCED 1	GO:0005737,GO:0050662,GO:0016491,GO:0016616,GO:0016132,GO:0016131,GO:0007275,GO:0010422,GO:0009646	cytoplasm|coenzyme binding|oxidoreductase activity|oxidoreductase activity, acting on the CH-OH group of donors, NAD or NADP as acceptor|brassinosteroid biosynthetic process|brassinosteroid metabolic process|multicellular organism development|regulation of brassinosteroid biosynthetic process|response to absence of light
LOC115704884	179.042	62.7921	295.293	4.7279	2.2412	4.28e-06	9.38e-05	Up	4.45992	4.99588	4.11048	4.26195	0.26079	1.70447	1.13583	0.755926		At4g15060	GeneID:115704884	putative F-box/LRR-repeat protein At4g15060
LOC115704897	535.845	1046.95	24.7446	0.0240182	-5.37973	8.12e-07	2.14e-05	Down	0.260158	0.436325	0.0858406	0.349961	0.371993	23.2154	18.4771	7.09255	ATC401	At5g21222	GeneID:115704897	pentatricopeptide repeat-containing protein At5g25630-like
LOC115704898	276.671	495.922	57.4207	0.123902	-3.01273	1.07e-05	0.00020693	Down	1.15435	1.8596	1.7684	1.07327	0.990347	18.9202	20.0893	11.5534	RPL7AB	At3g62870	GeneID:115704898	60S ribosomal protein L7a-2	GO:0005829,GO:0022625,GO:0022626,GO:0016020,GO:0042788,GO:0005774,GO:0003723,GO:0003735,GO:0000470,GO:0006412	cytosol|cytosolic large ribosomal subunit|cytosolic ribosome|membrane|polysomal ribosome|vacuolar membrane|RNA binding|structural constituent of ribosome|maturation of LSU-rRNA|translation	ko03010	Ribosome
LOC115704918	10.843	0.970786	20.7152	20.6126	4.36545	0.000107905	0.00151947	Up	0.607363	0.767075	0.343548	0.332722	0.0267217	0	0	0.0688492	PDLP8	At3g60720	GeneID:115704918	plasmodesmata-located protein 8
LOC115704923	132.065	230.092	34.0376	0.217934	-2.19804	0.00459095	0.0313604	Down	1.0452	0.976881	1.42585	0.99246	3.41098	0.777882	2.45046	23.436			GeneID:115704923	uncharacterized protein LOC115704923
LOC115704934	219.97	111.564	328.376	2.96525	1.56815	1.03e-07	3.41e-06	Up	5.4874	3.36941	4.27232	4.52461	1.00027	1.90951	1.21777	1.91735	CNGC3	At2g46430	GeneID:115704934	cyclic nucleotide-gated ion channel 1-like	GO:0016021,GO:0005886,GO:0005516,GO:0030552,GO:0030553,GO:0005216	integral component of membrane|plasma membrane|calmodulin binding|cAMP binding|cGMP binding|ion channel activity	ko04626	Plant-pathogen interaction
LOC115704937	672.607	404.65	940.565	2.22419	1.15328	0.00535525	0.0354158	Up	22.1584	24.1721	12.8783	10.2309	3.80305	12.2728	5.41702	8.70424	GAT1	At1g08230	GeneID:115704937	GABA transporter 1-like	GO:0016021,GO:0005886,GO:0015171,GO:0015185,GO:0003333,GO:0015812	integral component of membrane|plasma membrane|amino acid transmembrane transporter activity|gamma-aminobutyric acid transmembrane transporter activity|amino acid transmembrane transport|gamma-aminobutyric acid transport
LOC115704946	165.299	272.883	57.7153	0.209375	-2.25584	3.13e-08	1.16e-06	Down	1.54171	1.6804	1.16274	1.08203	6.79867	3.31525	10.6133	5.26827	MYB1		GeneID:115704946	transcription factor MYB15-like
LOC115704971	3212.47	4872.67	1552.28	0.324663	-1.62298	5.66e-23	9.97e-21	Down	28.1952	20.4728	21.135	20.5943	79.9717	90.264	68.7258	45.9192	WAXY		GeneID:115704971	granule-bound starch synthase 1, chloroplastic/amyloplastic-like	GO:0009501,GO:0009507,GO:0033201,GO:0004373,GO:0009011,GO:0019252	amyloplast|chloroplast|alpha-1,4-glucan synthase activity|glycogen (starch) synthase activity|starch synthase activity|starch biosynthetic process	ko00500	Starch and sucrose metabolism
LOC115704996	12.5551	24.6313	0.479014	0.0196612	-5.6685	0.000156997	0.00208227	Down	0	0.0115818	0	0.0103823	0.525308	0.0251524	0.226849	0.354481	LRL1	At2g24260	GeneID:115704996	uncharacterized protein LOC115704996 isoform X1	GO:0005634,GO:0003677,GO:0001228,GO:0003700,GO:0046983,GO:0055046,GO:0048235,GO:0006355,GO:0080147,GO:0048765,GO:0048767	nucleus|DNA binding|DNA-binding transcription activator activity, RNA polymerase II-specific|DNA-binding transcription factor activity|protein dimerization activity|microgametogenesis|pollen sperm cell differentiation|regulation of transcription, DNA-templated|root hair cell development|root hair cell differentiation|root hair elongation
LOC115704998	157.666	220.325	95.0082	0.430688	-1.21528	1.52e-09	7.06e-08	Down	1.44761	1.83375	1.35064	1.37457	3.68742	3.15842	3.61775	3.53346	DTX19	At3g23560	GeneID:115704998	protein DETOXIFICATION 18-like	GO:0016021,GO:0015297,GO:0015238,GO:0006855,GO:0009636	integral component of membrane|antiporter activity|drug transmembrane transporter activity|drug transmembrane transport|response to toxic substance
LOC115705017	142.801	283.504	2.09904	0.00734544	-7.08894	1.98e-16	2.11e-14	Down	0	0.019503	0.145804	0	7.45577	7.13679	2.83482	4.70302	SAT4	At4g35640	GeneID:115705017	serine acetyltransferase 2-like	GO:0005829,GO:0009001,GO:0006535,GO:0000103	cytosol|serine O-acetyltransferase activity|cysteine biosynthetic process from serine|sulfate assimilation	ko00270,ko00920	Cysteine and methionine metabolism|Sulfur metabolism
LOC115705018	164.352	313.303	15.4012	0.122974	-3.02358	0.00217112	0.0176083	Down	0.781562	0.251962	0.80728	0.387197	1.74919	0.97712	1.2616	41.3628	BAP2	At2g45760	GeneID:115705018	BON1-associated protein 2-like	GO:0016020,GO:0006952	membrane|defense response
LOC115705024	1003.32	621.531	1385.11	2.22989	1.15697	1.26e-10	6.9e-09	Up	67.7134	58.4963	78.6061	68.9432	29.373	24.0137	39.1328	30.9956			GeneID:115705024	transmembrane protein 258-like
LOC115705025	40.365	77.298	3.43198	0.0347786	-4.84566	0.000200141	0.00258662	Down	0.0159359	0.0168802	0.108168	0.090791	0	2.82273	1.82714	0.688862	UGT76F1	At3g55700	GeneID:115705025	UDP-glycosyltransferase 76F1-like	GO:0043231,GO:0080043,GO:0080044,GO:0008194	intracellular membrane-bounded organelle|quercetin 3-O-glucosyltransferase activity|quercetin 7-O-glucosyltransferase activity|UDP-glycosyltransferase activity
LOC115705036	81.8518	129.982	33.7214	0.251192	-1.99314	4.46e-10	2.24e-08	Down	1.2298	0.712782	0.944996	0.440659	3.10551	3.73644	3.49657	2.53037			GeneID:115705036	uncharacterized protein LOC115705036 isoform X4
LOC115705039	113.82	70.6612	156.978	2.23298	1.15897	3.47e-07	1.01e-05	Up	1.9806	1.90839	2.25411	1.80137	1.06457	0.933191	0.716569	0.86741	PTL	At5g03680	GeneID:115705039	trihelix transcription factor PTL-like	GO:0005634,GO:0003677,GO:0003700,GO:0019900,GO:0042803,GO:0043565,GO:0048498,GO:0046621,GO:0090428,GO:0048441,GO:0009909,GO:0006355,GO:0010200,GO:0048442	nucleus|DNA binding|DNA-binding transcription factor activity|kinase binding|protein homodimerization activity|sequence-specific DNA binding|establishment of petal orientation|negative regulation of organ growth|perianth development|petal development|regulation of flower development|regulation of transcription, DNA-templated|response to chitin|sepal development
LOC115705050	1527.71	2255.52	799.906	0.354763	-1.49507	1.01e-61	9.73e-59	Down	11.8334	11.8052	12.8463	11.183	32.8118	36.9689	33.6852	31.6734	TS1	At4g29840	GeneID:115705050	threonine synthase 1, chloroplastic-like	GO:0009507,GO:0009570,GO:0005737,GO:0005829,GO:0030170,GO:0004795,GO:0009088	chloroplast|chloroplast stroma|cytoplasm|cytosol|pyridoxal phosphate binding|threonine synthase activity|threonine biosynthetic process	ko00260,ko00750	Glycine, serine and threonine metabolism|Vitamin B6 metabolism
LOC115705051	68.3724	130.85	5.89525	0.0429889	-4.53989	9.56e-08	3.22e-06	Down	0.263871	0	0.24876	0.0417595	1.45891	5.23544	2.5452	3.11083	VIP3	At4g29830	GeneID:115705051	LOW QUALITY PROTEIN: WD repeat-containing protein VIP3-like	GO:0016593,GO:0080008,GO:0005829,GO:0005634,GO:0009908,GO:0010452,GO:0051568,GO:0009910,GO:0016441	Cdc73/Paf1 complex|Cul4-RING E3 ubiquitin ligase complex|cytosol|nucleus|flower development|histone H3-K36 methylation|histone H3-K4 methylation|negative regulation of flower development|posttranscriptional gene silencing	ko03018	RNA degradation
LOC115705054	4648.07	810.533	8485.61	10.5698	3.40187	0.00359369	0.0259267	Up	337.543	321.596	320.63	318.935	1.65201	82.5984	2.32607	39.5851	RPP1A		GeneID:115705054	60S acidic ribosomal protein P1-like	GO:0022625,GO:0030295,GO:0044877,GO:0043021,GO:0003735,GO:0002181,GO:0006414	cytosolic large ribosomal subunit|protein kinase activator activity|protein-containing complex binding|ribonucleoprotein complex binding|structural constituent of ribosome|cytoplasmic translation|translational elongation	ko03010	Ribosome
LOC115705056	34.6969	6.87146	62.5224	10.0897	3.33482	0.00319511	0.0235827	Up	1.02353	1.51129	0.912286	0.662652	0.319315	0	0	0.121885	ALDH2C4	At3g24503	GeneID:115705056	aldehyde dehydrogenase family 2 member C4-like	GO:0005829,GO:0004029,GO:0050269,GO:0043878,GO:0009699	cytosol|aldehyde dehydrogenase (NAD) activity|coniferyl-aldehyde dehydrogenase activity|glyceraldehyde-3-phosphate dehydrogenase (NAD+) (non-phosphorylating) activity|phenylpropanoid biosynthetic process	ko00940	Phenylpropanoid biosynthesis
LOC115705058	623.641	969.95	277.332	0.308333	-1.69744	0.000381529	0.00438759	Down	6.08947	8.85431	8.00738	3.49921	50.5339	9.97631	11.6795	19.0734	MIOX2	At2g19800	GeneID:115705058	inositol oxygenase 2-like	GO:0005737,GO:0050113,GO:0005506,GO:0019310,GO:0019853	cytoplasm|inositol oxygenase activity|iron ion binding|inositol catabolic process|L-ascorbic acid biosynthetic process	ko00053,ko00562	Ascorbate and aldarate metabolism|Inositol phosphate metabolism
LOC115705069	14.4965	28.047	0.945991	0.0338393	-4.88516	5.81e-07	1.6e-05	Down	0.0293423	0.0155405	0	0.0139309	0.2853	0.523116	0.624791	0.331508	GULLO6	At2g46760	GeneID:115705069	probable L-gulonolactone oxidase 6	GO:0016020,GO:0003885,GO:0071949,GO:0050105,GO:0019853	membrane|D-arabinono-1,4-lactone oxidase activity|FAD binding|L-gulonolactone oxidase activity|L-ascorbic acid biosynthetic process	ko00053	Ascorbate and aldarate metabolism
LOC115705070	68.2058	123.719	12.6929	0.102727	-3.28311	3.33e-20	4.64e-18	Down	0.32019	0.180887	0.386372	0.263497	2.51503	2.3079	3.4031	3.0408	DET2		GeneID:115705070	3-oxo-5-alpha-steroid 4-dehydrogenase 2-like	GO:0005737,GO:0016021,GO:0003865,GO:0047751,GO:0050213,GO:0016132,GO:0055114,GO:0090378,GO:0090377	cytoplasm|integral component of membrane|3-oxo-5-alpha-steroid 4-dehydrogenase activity|cholestenone 5-alpha-reductase activity|progesterone 5-alpha-reductase activity|brassinosteroid biosynthetic process|oxidation-reduction process|seed trichome elongation|seed trichome initiation
LOC115705085	117.745	223.742	11.7482	0.053017	-4.2374	5.32e-26	1.16e-23	Down	0.29298	0.177338	0.21307	0.357682	5.88889	3.77904	6.51269	3.74183		At5g03610	GeneID:115705085	GDSL esterase/lipase At5g03610-like	GO:0005576,GO:0016788,GO:0016042	extracellular region|hydrolase activity, acting on ester bonds|lipid catabolic process
LOC115705093	401.826	639.161	164.491	0.251369	-1.99212	7.76e-13	5.69e-11	Down	4.75861	3.65815	3.06645	2.53571	11.7595	11.7319	20.0394	11.3226			GeneID:115705093	uncharacterized protein LOC115705093
LOC115705096	63.8995	100.388	27.4112	0.272469	-1.87584	0.000185504	0.0024186	Down	1.0254	0.362053	0.38667	0.70996	1.71056	3.16966	3.00917	1.3012	GLIP5	At1g53920	GeneID:115705096	GDSL esterase/lipase 5-like	GO:0005576,GO:0016298,GO:0016042	extracellular region|lipase activity|lipid catabolic process
LOC115705102	148.072	296.144	0	0.000633758	-10.6238	0.00169104	0.0144404	Down	0	0	0	0	0	7.40662	6.57697	3.80397			GeneID:115705102	uncharacterized protein LOC115705102 isoform X1
LOC115705155	1454.54	927.544	1981.53	2.13609	1.09497	6.58e-08	2.3e-06	Up	26.6178	28.1026	23.7029	26.3412	10.0495	16.6499	9.74302	12.9832	LIF2	At4g00830	GeneID:115705155	LOW QUALITY PROTEIN: heterogeneous nuclear ribonucleoprotein Q-like	GO:0005737,GO:0005829,GO:0005783,GO:0005634,GO:0003682,GO:0003729,GO:0043565,GO:0071395,GO:0042742,GO:0050832,GO:0045087,GO:0007275,GO:0045824,GO:0045893,GO:1905933,GO:0009909,GO:0010468,GO:0010439,GO:1902464,GO:0009617	cytoplasm|cytosol|endoplasmic reticulum|nucleus|chromatin binding|mRNA binding|sequence-specific DNA binding|cellular response to jasmonic acid stimulus|defense response to bacterium|defense response to fungus|innate immune response|multicellular organism development|negative regulation of innate immune response|positive regulation of transcription, DNA-templated|regulation of cell fate determina…
LOC115705160	1936.45	1088.76	2784.14	2.59273	1.37447	1.06e-05	0.000204204	Up	27.8264	35.7025	23.4655	28.5064	6.07473	11.9797	18.167	9.59704	AGD14	At1g08680/At1g08690	GeneID:115705160	probable ADP-ribosylation factor GTPase-activating protein AGD14	GO:0005096,GO:0046872	GTPase activator activity|metal ion binding
LOC115705174	60.8972	16.001	105.793	6.59852	2.72214	2.8e-17	3.26e-15	Up	1.69677	1.75123	1.42734	1.62493	0.265428	0.200166	0.221703	0.299199		At4g29420	GeneID:115705174	F-box/LRR-repeat protein At4g29420-like
LOC115705176	164.023	235.161	92.8851	0.396119	-1.33599	1.47e-08	5.87e-07	Down	2.59875	2.96655	2.11217	2.25201	5.02187	5.83306	7.90707	6.59345			GeneID:115705176	uncharacterized protein LOC115705176 isoform X1
LOC115705177	106.079	2.4781	209.679	85.541	6.41854	1.13e-25	2.41e-23	Up	4.86346	8.121	7.64156	9.33234	0	0.194234	0	0.165903	RPS15AE	At4g29430	GeneID:115705177	40S ribosomal protein S15a-5-like	GO:0022626,GO:0022627,GO:0005739,GO:0042788,GO:0005773,GO:0003735,GO:0006412	cytosolic ribosome|cytosolic small ribosomal subunit|mitochondrion|polysomal ribosome|vacuole|structural constituent of ribosome|translation	ko03010	Ribosome
LOC115705224	9620.46	14865.4	4375.56	0.302499	-1.725	3.48e-16	3.59e-14	Down	45.6043	38.0548	42.7118	35.354	198.772	107.824	149.993	92.3621	LHY		GeneID:115705224	LOW QUALITY PROTEIN: protein LHY-like	GO:0005634,GO:0003700,GO:0044212,GO:0007623,GO:0048574,GO:0042754,GO:0043433,GO:0042752,GO:0006355,GO:0009737,GO:0009733,GO:0046686,GO:0009409,GO:0009723,GO:0009739,GO:0009753,GO:0009751,GO:0009651	nucleus|DNA-binding transcription factor activity|transcription regulatory region DNA binding|circadian rhythm|long-day photoperiodism, flowering|negative regulation of circadian rhythm|negative regulation of DNA-binding transcription factor activity|regulation of circadian rhythm|regulation of transcription, DNA-templated|response to abscisic acid|response to auxin|response to cadmium ion|respon…	ko04712	Circadian rhythm - plant
LOC115705227	930.723	1338.02	523.429	0.402599	-1.31259	0.000799096	0.00788625	Down	4.21616	4.11928	4.08198	4.86184	3.3876	15.3191	15.871	10.3361		Os06g0143900	GeneID:115705227	coatomer subunit beta'-1-like	GO:0030126,GO:0000139,GO:0005198,GO:0006888,GO:0006891,GO:0006886,GO:0006890	COPI vesicle coat|Golgi membrane|structural molecule activity|ER to Golgi vesicle-mediated transport|intra-Golgi vesicle-mediated transport|intracellular protein transport|retrograde vesicle-mediated transport, Golgi to ER
LOC115705234	1432.29	861.868	2002.71	2.32596	1.21783	7.12e-23	1.23e-20	Up	36.3704	40.0419	37.2665	36.3141	17.7293	14.3103	17.5224	15.2614	UBP12	At5g06600	GeneID:115705234	MATH domain and coiled-coil domain-containing protein At3g58210-like isoform X2	GO:0005737,GO:0005829,GO:0005634,GO:0004197,GO:0004843,GO:0009867,GO:0016579,GO:0031647,GO:0006511	cytoplasm|cytosol|nucleus|cysteine-type endopeptidase activity|thiol-dependent ubiquitin-specific protease activity|jasmonic acid mediated signaling pathway|protein deubiquitination|regulation of protein stability|ubiquitin-dependent protein catabolic process
LOC115705266	464.823	658.996	270.65	0.401826	-1.31536	4.48e-06	9.75e-05	Down	5.78363	2.53289	2.61183	2.61728	8.3541	12.4375	5.98106	6.31851	BOR4	At1g15460	GeneID:115705266	boron transporter 4	GO:0005887,GO:0005886,GO:0015301,GO:0080139,GO:0005452,GO:0046713,GO:0080029,GO:0051453	integral component of plasma membrane|plasma membrane|anion:anion antiporter activity|borate efflux transmembrane transporter activity|inorganic anion exchanger activity|borate transport|cellular response to boron-containing substance levels|regulation of intracellular pH
LOC115705267	565.615	898.852	232.379	0.268636	-1.89627	1.13e-09	5.35e-08	Down	3.17536	2.39236	2.74475	2.70726	4.6299	13.0916	11.5497	13.8513	SULTR3;4	At3g15990	GeneID:115705267	probable sulfate transporter 3.4	GO:0016021,GO:0009506,GO:0015301,GO:0008271,GO:0015116,GO:0015293	integral component of membrane|plasmodesma|anion:anion antiporter activity|secondary active sulfate transmembrane transporter activity|sulfate transmembrane transporter activity|symporter activity
LOC115705273	346.129	119.446	572.812	4.79387	2.26119	8.31e-21	1.23e-18	Up	9.925	8.06195	6.37057	8.11601	1.26997	2.01544	1.48982	2.05	UVR3	At3g15620	GeneID:115705273	(6-4)DNA photolyase	GO:0003914,GO:0003677,GO:0000166,GO:0006281,GO:0009411	DNA (6-4) photolyase activity|DNA binding|nucleotide binding|DNA repair|response to UV
LOC115705329	411.925	558.714	265.135	0.47637	-1.06985	0.00063166	0.00652206	Down	3.78629	3.49186	6.52092	7.35148	4.07257	13.3033	15.1597	12.7139		CNBF2260	GeneID:115705329	acyl-protein thioesterase 1 homolog 1	GO:0005737,GO:0052689,GO:0006631	cytoplasm|carboxylic ester hydrolase activity|fatty acid metabolic process	ko00564	Glycerophospholipid metabolism
LOC115705349	57.1327	85.6647	28.6008	0.327068	-1.61234	0.000325562	0.00386891	Down	0.772278	0.54536	1.74732	1.39678	1.59855	3.38389	5.30071	3.25162			GeneID:115705349	uncharacterized protein LOC115705349
LOC115705374	315.76	524.614	106.906	0.204646	-2.2888	1.02e-05	0.000198927	Down	1.35985	1.62255	2.24567	1.85523	1.98465	14.8499	12.1352	6.41876	ALDH2C4	At3g24503	GeneID:115705374	aldehyde dehydrogenase family 2 member C4-like	GO:0005829,GO:0004029,GO:0050269,GO:0043878,GO:0009699	cytosol|aldehyde dehydrogenase (NAD) activity|coniferyl-aldehyde dehydrogenase activity|glyceraldehyde-3-phosphate dehydrogenase (NAD+) (non-phosphorylating) activity|phenylpropanoid biosynthetic process	ko00940	Phenylpropanoid biosynthesis
LOC115705377	336.05	492.702	179.398	0.365572	-1.45177	5.55e-16	5.63e-14	Down	1.54047	1.45512	1.47321	1.5683	5.05027	3.64415	3.84115	4.07996			GeneID:115705377	uncharacterized protein LOC115705377 isoform X1
LOC115705385	2401.78	3362.55	1441.01	0.434428	-1.20281	5.05e-08	1.79e-06	Down	14.4882	15.0369	17.1844	12.887	32.1201	27.1832	29.384	50.8429			GeneID:115705385	uncharacterized protein LOC115705385
LOC115705409	452.63	261.132	644.128	2.46626	1.30232	0.000428486	0.0048039	Up	5.15036	5.46389	5.46122	5.42142	2.4683	0.969205	3.50853	1.81042		At5g56730	GeneID:115705409	LOW QUALITY PROTEIN: zinc protease PQQL-like	GO:0009507,GO:0005739,GO:0009536,GO:0046872,GO:0004222	chloroplast|mitochondrion|plastid|metal ion binding|metalloendopeptidase activity
LOC115705430	3562.18	2335.91	4788.45	2.0517	1.03682	1.06e-15	1.04e-13	Up	47.8462	44.3773	48.3638	42.5295	22.1463	26.5102	18.6889	22.3955	SS		GeneID:115705430	sucrose synthase-like	GO:0016157,GO:0009877,GO:0005985	sucrose synthase activity|nodulation|sucrose metabolic process	ko00500	Starch and sucrose metabolism
LOC115705432	1144.79	1544.81	744.77	0.485836	-1.04146	2.38e-05	0.000414255	Down	5.69583	6.8285	5.22664	6.65032	16.9172	11.5805	8.66181	13.4952	PRP40A	At1g44910	GeneID:115705432	pre-mRNA-processing protein 40A-like isoform X1	GO:0005829,GO:0016592,GO:0005685,GO:0071004,GO:0003723,GO:0000398	cytosol|mediator complex|U1 snRNP|U2-type prespliceosome|RNA binding|mRNA splicing, via spliceosome	ko03040	Spliceosome
LOC115705444	1483.24	876.68	2089.79	2.26286	1.17815	0.00107945	0.0100391	Up	36.3297	56.8795	23.9687	16.0061	19.9875	9.80663	10.8864	15.098	GDHA		GeneID:115705444	glutamate dehydrogenase A	GO:0004353,GO:0006520	glutamate dehydrogenase [NAD(P)+] activity|cellular amino acid metabolic process	ko00220,ko00250,ko00910	Arginine biosynthesis|Alanine, aspartate and glutamate metabolism|Nitrogen metabolism
LOC115705449	1859.14	785.515	2932.77	3.73351	1.90053	3.58e-101	1.38e-97	Up	56.237	55.1036	61.6657	57.8964	15.0839	16.8117	14.8654	15.4179	THO6	At2g19430	GeneID:115705449	LOW QUALITY PROTEIN: THO complex subunit 6-like	GO:0080008,GO:0005634,GO:0000347,GO:0003723,GO:0009738,GO:0031047,GO:0006397,GO:0051028,GO:0009788,GO:0010267,GO:0016567,GO:0008380	Cul4-RING E3 ubiquitin ligase complex|nucleus|THO complex|RNA binding|abscisic acid-activated signaling pathway|gene silencing by RNA|mRNA processing|mRNA transport|negative regulation of abscisic acid-activated signaling pathway|production of ta-siRNAs involved in RNA interference|protein ubiquitination|RNA splicing	ko03013	RNA transport
LOC115705461	710.985	1043.23	378.741	0.440711	-1.1821	0.00691596	0.0428317	Down	5.68853	4.96383	4.37998	5.08028	5.73314	9.51175	7.97662	32.5961		At2g46620	GeneID:115705461	AAA-ATPase At2g46620	GO:0016021,GO:0005524,GO:0016887	integral component of membrane|ATP binding|ATPase activity
LOC115705482	1465.92	2746.11	185.729	0.0688138	-3.86116	7.3e-79	1.27e-75	Down	0.838411	0.937707	0.821307	1.0852	17.6167	13.9102	12.2187	10.8643	EMB8		GeneID:115705482	uncharacterized protein LOC115705482 isoform X1	GO:0052689	carboxylic ester hydrolase activity
LOC115705487	1157.31	2234.08	80.5528	0.0361224	-4.79096	9.37e-74	1.5e-70	Down	1.71052	1.43043	1.48695	1.52163	56.5374	31.7689	31.9692	50.1135			GeneID:115705487	uncharacterized protein LOC115705487
LOC115705490	1330.23	715.205	1945.25	2.71901	1.44308	1.75e-07	5.57e-06	Up	40.2523	46.5367	41.8022	36.3786	16.317	8.74416	21.6055	14.2693	UBA1C	At2g19380	GeneID:115705490	UBP1-associated proteins 1C-like	GO:0005634,GO:1990904,GO:0003723,GO:0008270	nucleus|ribonucleoprotein complex|RNA binding|zinc ion binding
LOC115705494	1583.54	2134.14	1032.94	0.485623	-1.04209	2.61e-14	2.25e-12	Down	7.73014	7.26265	8.32245	7.54754	15.2265	12.9761	17.2129	18.657			GeneID:115705494	uncharacterized protein LOC115705494
LOC115705514	464.523	234.043	695.004	2.96602	1.56853	1.36e-05	0.000254722	Up	18.821	18.7406	18.8489	15.9141	7.49458	2.51194	8.38682	6.00274	APS1		GeneID:115705514	acid phosphatase 1-like	GO:0003993	acid phosphatase activity
LOC115705515	1552.97	425.933	2680.01	6.34795	2.66629	4.85e-101	1.55e-97	Up	14.547	12.8282	11.1764	12.1436	2.39395	2.23776	1.7249	1.72286	EMB8		GeneID:115705515	uncharacterized protein LOC115705515 isoform X1	GO:0052689	carboxylic ester hydrolase activity
LOC115705523	757.582	1107.87	407.296	0.367822	-1.44292	3.35e-07	9.81e-06	Down	5.06917	5.11202	5.4596	5.34437	8.88566	22.5112	11.6812	14.6059	ROPGAP3	At2g46710	GeneID:115705523	rho GTPase-activating protein 5	GO:0005886,GO:0009531,GO:0005096,GO:0007275,GO:0009664,GO:0007165	plasma membrane|secondary cell wall|GTPase activator activity|multicellular organism development|plant-type cell wall organization|signal transduction
LOC115705531	59.0775	88.6532	29.5017	0.333233	-1.5854	2.06e-07	6.38e-06	Down	0.238149	0.243852	0.21553	0.293973	0.862659	0.620881	0.719467	0.787683	PCMP-H65	At4g01030	GeneID:115705531	LOW QUALITY PROTEIN: pentatricopeptide repeat-containing protein At4g01030, mitochondrial-like
LOC115705538	473.122	700.004	246.241	0.351873	-1.50687	9.45e-26	2.04e-23	Down	2.44663	2.44601	2.44646	2.22747	5.99572	6.57678	8.21497	6.59878			GeneID:115705538	uncharacterized protein LOC115705912 isoform X3
LOC115705546	661.807	295.383	1028.23	3.47672	1.79773	1.28e-08	5.15e-07	Up	37.8326	27.8645	32.2226	28.7556	9.13363	5.0428	14.299	8.10109	FAX2	At3g43520	GeneID:115705546	protein FATTY ACID EXPORT 2, chloroplastic-like	GO:0009507,GO:0009941,GO:0031969,GO:0016021,GO:0009536	chloroplast|chloroplast envelope|chloroplast membrane|integral component of membrane|plastid
LOC115705556	965.163	1356.42	573.902	0.423013	-1.24123	7.7e-32	2.24e-29	Down	10.0614	9.04953	8.97449	8.14049	23.8188	19.9097	22.1846	19.9887	LIF2	At4g00830	GeneID:115705556	heterogeneous nuclear ribonucleoprotein Q-like	GO:0005737,GO:0005829,GO:0005783,GO:0005634,GO:0003682,GO:0003729,GO:0043565,GO:0071395,GO:0042742,GO:0050832,GO:0045087,GO:0007275,GO:0045824,GO:0045893,GO:1905933,GO:0009909,GO:0010468,GO:0010439,GO:1902464,GO:0009617	cytoplasm|cytosol|endoplasmic reticulum|nucleus|chromatin binding|mRNA binding|sequence-specific DNA binding|cellular response to jasmonic acid stimulus|defense response to bacterium|defense response to fungus|innate immune response|multicellular organism development|negative regulation of innate immune response|positive regulation of transcription, DNA-templated|regulation of cell fate determina…
LOC115705593	2716.49	4827.96	605.009	0.20293	-2.30095	4.03e-05	0.000650773	Down	6.89035	6.83419	6.85007	6.20565	11.2615	24.5683	20.6567	158.761		At2g40140	GeneID:115705593	zinc finger CCCH domain-containing protein 29-like	GO:0005634,GO:0003677,GO:0003700,GO:0046872,GO:0050832,GO:0006355,GO:0010200,GO:0009409	nucleus|DNA binding|DNA-binding transcription factor activity|metal ion binding|defense response to fungus|regulation of transcription, DNA-templated|response to chitin|response to cold
LOC115705595	1960.21	1294.61	2625.82	2.02962	1.02121	4.9e-13	3.73e-11	Up	41.6668	33.9506	39.0318	35.3446	15.4819	21.2673	17.1758	20.4939	EPSPS		GeneID:115705595	3-phosphoshikimate 1-carboxyvinyltransferase 2-like	GO:0009507,GO:0003866,GO:0009073,GO:0009423,GO:0009635	chloroplast|3-phosphoshikimate 1-carboxyvinyltransferase activity|aromatic amino acid family biosynthetic process|chorismate biosynthetic process|response to herbicide	ko00400	Phenylalanine, tyrosine and tryptophan biosynthesis
LOC115705598	4584.88	7471.92	1697.83	0.229778	-2.12168	3.09e-65	3.3e-62	Down	21.6338	16.6037	18.5473	18.3622	96.3974	90.0139	79.5874	65.7094			GeneID:115705598	LOW QUALITY PROTEIN: transketolase, chloroplastic-like	GO:0009535,GO:0046872,GO:0004802,GO:0019253	chloroplast thylakoid membrane|metal ion binding|transketolase activity|reductive pentose-phosphate cycle	ko00030,ko00710	Pentose phosphate pathway|Carbon fixation in photosynthetic organisms
LOC115705599	1144.84	1788.21	501.475	0.280318	-1.83486	8.85e-43	3.78e-40	Down	7.21932	6.59615	7.97507	5.98733	26.5815	22.5535	26.3866	23.8554	EPSPS		GeneID:115705599	3-phosphoshikimate 1-carboxyvinyltransferase 2	GO:0009507,GO:0003866,GO:0009073,GO:0009423,GO:0009635	chloroplast|3-phosphoshikimate 1-carboxyvinyltransferase activity|aromatic amino acid family biosynthetic process|chorismate biosynthetic process|response to herbicide	ko00400	Phenylalanine, tyrosine and tryptophan biosynthesis
LOC115705604	379.92	570.207	189.633	0.332187	-1.58993	6.91e-14	5.77e-12	Down	7.90007	6.75256	8.05231	8.72695	25.1423	18.0383	29.4669	22.3233			GeneID:115705604	prefoldin subunit 1-like
LOC115705619	223.582	75.8827	371.282	4.84668	2.277	8e-19	1.04e-16	Up	6.30074	5.22621	4.62429	4.35115	1.17642	0.6738	1.25093	1.09989	ALDH5F1	At1g79440	GeneID:115705619	LOW QUALITY PROTEIN: succinate-semialdehyde dehydrogenase, mitochondrial-like	GO:0009507,GO:0009570,GO:0005759,GO:0005739,GO:0005507,GO:0051287,GO:0004777,GO:0009013,GO:0009450,GO:0006540,GO:0072593,GO:0009408,GO:0009416	chloroplast|chloroplast stroma|mitochondrial matrix|mitochondrion|copper ion binding|NAD binding|succinate-semialdehyde dehydrogenase (NAD+) activity|succinate-semialdehyde dehydrogenase [NAD(P)+] activity|gamma-aminobutyric acid catabolic process|glutamate decarboxylation to succinate|reactive oxygen species metabolic process|response to heat|response to light stimulus	ko00250,ko00650	Alanine, aspartate and glutamate metabolism|Butanoate metabolism
LOC115705621	2196.38	4020.54	372.224	0.0938419	-3.41362	6.23e-24	1.17e-21	Down	7.46348	6.85737	5.26787	6.00846	112.862	31.9492	68.0332	62.6121			GeneID:115705621	uncharacterized protein LOC115705621
LOC115705627	4326.26	6202.59	2449.93	0.39606	-1.33621	1.23e-13	9.96e-12	Down	45.038	34.5826	49.8075	42.7341	100.461	139.614	108.796	89.7142	AS		GeneID:115705627	hydroquinone glucosyltransferase-like	GO:0050505	hydroquinone glucosyltransferase activity
LOC115705629	343.905	527.841	159.969	0.303338	-1.721	3.88e-29	1.05e-26	Down	4.46455	3.6299	3.98592	4.28511	12.6433	13.4346	15.7057	12.5656	CDC31	YOR257W	GeneID:115705629	centrin-1-like	GO:0005813,GO:0005825,GO:0005643,GO:0005634,GO:0070390,GO:0005509,GO:0042802,GO:0008017,GO:0005200,GO:0019722,GO:0051301,GO:0007020,GO:1903087,GO:0051028,GO:0043161,GO:0015031,GO:0043549,GO:0030474	centrosome|half bridge of spindle pole body|nuclear pore|nucleus|transcription export complex 2|calcium ion binding|identical protein binding|microtubule binding|structural constituent of cytoskeleton|calcium-mediated signaling|cell division|microtubule nucleation|mitotic spindle pole body duplication|mRNA transport|proteasome-mediated ubiquitin-dependent protein catabolic process|protein transpo…
LOC115705636	45.5311	66.2619	24.8002	0.371791	-1.42744	0.00239933	0.0189782	Down	1.10628	1.28524	0.403714	0.948807	3.06164	1.64186	2.92262	2.41912	STP14	At1g77210	GeneID:115705636	sugar transport protein 14-like	GO:0005887,GO:0005886,GO:0005351,GO:0005355,GO:0008645	integral component of plasma membrane|plasma membrane|carbohydrate:proton symporter activity|glucose transmembrane transporter activity|hexose transmembrane transport
LOC115705647	1089.12	720.882	1457.35	2.02475	1.01774	2.15e-06	5.08e-05	Up	28.5469	17.7291	31.7654	25.2984	10.3372	14.9091	12.1296	14.0473			GeneID:115705647	uncharacterized protein LOC115705647
LOC115705654	467.873	36.7441	899.002	25.4012	4.66682	4.55e-06	9.88e-05	Up	14.2727	12.2709	15.9951	14.0884	0.101935	1.24703	0.0324353	0.963004	TBL23	At4g11090	GeneID:115705654	protein trichome birefringence-like 23	GO:0005794,GO:0016021,GO:0016413	Golgi apparatus|integral component of membrane|O-acetyltransferase activity
LOC115705658	164.216	245.229	83.2035	0.340063	-1.55612	3.91e-09	1.71e-07	Down	1.66039	1.05527	1.05871	1.54794	3.43604	4.60081	4.49972	3.27727	PCMP-H66	At2g15690	GeneID:115705658	pentatricopeptide repeat-containing protein At2g15690, mitochondrial-like
LOC115705668	1659.98	993.885	2326.08	2.37069	1.24531	4.8e-09	2.09e-07	Up	20.442	20.8435	17.2518	19.9399	11.8968	6.57648	7.18262	7.86259		At5g13980	GeneID:115705668	probable alpha-mannosidase At5g13980	GO:0048046,GO:0005618,GO:0009505,GO:0005774,GO:0005773,GO:0004559,GO:0030246,GO:0046872,GO:0006013,GO:0006517	apoplast|cell wall|plant-type cell wall|vacuolar membrane|vacuole|alpha-mannosidase activity|carbohydrate binding|metal ion binding|mannose metabolic process|protein deglycosylation	ko00511	Other glycan degradation
LOC115705682	60.4906	86.7972	34.1839	0.391354	-1.35346	0.00351195	0.0254543	Down	0.481912	0.157067	0.698944	0.457596	1.17319	1.16544	1.02547	1.20182	KU80	At1g48050	GeneID:115705682	ATP-dependent DNA helicase 2 subunit KU80-like	GO:0005737,GO:0043564,GO:0000784,GO:0005524,GO:0004003,GO:0003684,GO:0003690,GO:0042162,GO:0071480,GO:0071481,GO:0015074,GO:0006310,GO:0006281,GO:0006302,GO:0006303,GO:0009408,GO:0000723	cytoplasm|Ku70:Ku80 complex|nuclear chromosome, telomeric region|ATP binding|ATP-dependent DNA helicase activity|damaged DNA binding|double-stranded DNA binding|telomeric DNA binding|cellular response to gamma radiation|cellular response to X-ray|DNA integration|DNA recombination|DNA repair|double-strand break repair|double-strand break repair via nonhomologous end joining|response to heat|telome…	ko03450	Non-homologous end-joining
LOC115705683	554.137	1089.27	19.0009	0.0175551	-5.83196	1.33e-91	3.65e-88	Down	0.327915	0.152832	0.252255	0.323824	17.1797	12.0542	17.5024	14.0459			GeneID:115705683	peptide-N4-(N-acetyl-beta-glucosaminyl)asparagine amidase A-like	GO:0000224	peptide-N4-(N-acetyl-beta-glucosaminyl)asparagine amidase activity
LOC115705687	8494.1	4760.74	12227.5	2.56903	1.36122	1.05e-39	4.1e-37	Up	94.9125	108.974	99.0116	99.724	40.0483	41.1894	35.6755	40.633	ARF2B	Solyc12g042070	GeneID:115705687	LOW QUALITY PROTEIN: auxin response factor 2B-like	GO:0005634,GO:0003677,GO:0009734,GO:0009835,GO:0006355	nucleus|DNA binding|auxin-activated signaling pathway|fruit ripening|regulation of transcription, DNA-templated
LOC115705688	900.816	1704.33	97.3014	0.0600014	-4.05886	0.00103456	0.00970569	Down	1.19724	1.29211	0.919976	1.24408	0.0646	36.2842	28.8723	18.0758	ADE16	YLR028C	GeneID:115705688	uncharacterized protein LOC115705688 isoform X1	GO:0005829,GO:0003937,GO:0004643,GO:0006189,GO:0009060,GO:0030437,GO:0006164	cytosol|IMP cyclohydrolase activity|phosphoribosylaminoimidazolecarboxamide formyltransferase activity|'de novo' IMP biosynthetic process|aerobic respiration|ascospore formation|purine nucleotide biosynthetic process	ko00230,ko00670	Purine metabolism|One carbon pool by folate
LOC115705701	20101.7	8576.32	31627.1	3.708	1.89064	1.54e-23	2.85e-21	Up	538.827	530.591	522.681	595.962	190.144	136.194	114.409	153.277			GeneID:115705701	uncharacterized protein LOC115705701 isoform X1
LOC115705703	3539.09	1375.73	5702.44	4.14902	2.05277	8.2e-35	2.86e-32	Up	53.6829	48.5459	48.1372	52.8264	9.46365	15.7435	11.2557	12.9681			GeneID:115705703	uncharacterized protein LOC115705703 isoform X1
LOC115705721	2605.63	3503.42	1707.85	0.487822	-1.03557	2.51e-15	2.4e-13	Down	25.2397	22.2633	23.6002	23.2486	49.62	45.0521	58.0097	41.8989	PFK3	At4g26270	GeneID:115705721	ATP-dependent 6-phosphofructokinase 6-like	GO:0005829,GO:0003872,GO:0005524,GO:0046872,GO:0006002,GO:0006096,GO:0010053	cytosol|6-phosphofructokinase activity|ATP binding|metal ion binding|fructose 6-phosphate metabolic process|glycolytic process|root epidermal cell differentiation	ko00010,ko00030,ko00051,ko00052,ko03018	Glycolysis / Gluconeogenesis|Pentose phosphate pathway|Fructose and mannose metabolism|Galactose metabolism|RNA degradation
LOC115705722	358.615	2.35108	714.88	310.148	8.27681	2.63e-52	1.8e-49	Up	11.5206	12.6761	14.2373	13.5804	0.03928	0.0789924	0.0374964	0.0168677	ABCI6	At3g10670	GeneID:115705722	ABC transporter I family member 6, chloroplastic-like	GO:0009507,GO:0009570,GO:0005524,GO:0042626,GO:0005215,GO:0009793,GO:0010027	chloroplast|chloroplast stroma|ATP binding|ATPase activity, coupled to transmembrane movement of substances|transporter activity|embryo development ending in seed dormancy|thylakoid membrane organization
LOC115705733	121.479	225.832	17.1269	0.0756916	-3.72372	2.25e-45	1.05e-42	Down	0.170359	0.212299	0.192724	0.152248	2.57922	2.40899	2.58247	2.06747		At3g03770	GeneID:115705733	LOW QUALITY PROTEIN: probable inactive leucine-rich repeat receptor-like protein kinase At3g03770
LOC115705736	670.08	208.816	1131.34	5.42418	2.43941	4.6e-52	3.05e-49	Up	11.1592	9.13976	12.7072	10.9967	1.9929	2.35191	1.96248	1.85573	SCL6	At4g00150	GeneID:115705736	scarecrow-like protein 6	GO:0005634,GO:0003700,GO:0043565,GO:0030154,GO:0051301,GO:0007623,GO:0006355,GO:0048768	nucleus|DNA-binding transcription factor activity|sequence-specific DNA binding|cell differentiation|cell division|circadian rhythm|regulation of transcription, DNA-templated|root hair cell tip growth
LOC115705746	174.816	49.5945	300.037	6.21655	2.63611	1.91e-11	1.18e-09	Up	4.58976	4.29173	6.4098	4.85411	0.651752	0.80097	0.380207	1.50823	WAG1	At1g53700	GeneID:115705746	serine/threonine-protein kinase WAG1-like	GO:0005737,GO:0005829,GO:0005634,GO:0005886,GO:0005524,GO:0016301,GO:0004674,GO:0009926,GO:0009734,GO:0048825,GO:0006468,GO:0040008	cytoplasm|cytosol|nucleus|plasma membrane|ATP binding|kinase activity|protein serine/threonine kinase activity|auxin polar transport|auxin-activated signaling pathway|cotyledon development|protein phosphorylation|regulation of growth
LOC115705751	461.17	42.1321	880.207	20.8918	4.38487	0.000676006	0.00688935	Up	12.8498	13.5235	12.1009	13.0009	0.0315765	1.82564	0.0150713	0.637304	CDS4	At2g45150	GeneID:115705751	phosphatidate cytidylyltransferase 4, chloroplastic-like	GO:0031969,GO:0009535,GO:0016021,GO:0009536,GO:0004605,GO:0016024,GO:0006655	chloroplast membrane|chloroplast thylakoid membrane|integral component of membrane|plastid|phosphatidate cytidylyltransferase activity|CDP-diacylglycerol biosynthetic process|phosphatidylglycerol biosynthetic process	ko00564,ko04070	Glycerophospholipid metabolism|Phosphatidylinositol signaling system
LOC115705762	330.041	509.813	150.269	0.297814	-1.74751	1.06e-21	1.7e-19	Down	2.7401	2.48262	2.80738	2.94549	10.5466	10.1487	9.55959	7.14472			GeneID:115705762	uncharacterized protein LOC115705762
LOC115705763	4197.54	1823.32	6571.76	3.62521	1.85807	1.06e-17	1.3e-15	Up	112.131	136.288	92.252	110.864	33.3704	40.8136	21.6147	30.1105			GeneID:115705763	uncharacterized protein LOC115705763
LOC115705765	46.5948	68.4486	24.7411	0.368551	-1.44007	0.00183005	0.015371	Down	0.500966	0.849042	0.680078	0.594611	2.12031	1.69982	2.62576	0.861289	pptA		GeneID:115705765	L-aminoadipate-semialdehyde dehydrogenase-phosphopantetheinyl transferase-like isoform X1	GO:0008897,GO:0000287	holo-[acyl-carrier-protein] synthase activity|magnesium ion binding	ko00770	Pantothenate and CoA biosynthesis
LOC115705771	110.966	42.5609	179.37	4.25205	2.08816	6.31e-10	3.07e-08	Up	5.09838	4.91649	3.31914	4.93248	1.34797	0.80217	1.47059	0.732421	CDC31	YOR257W	GeneID:115705771	centrin-1-like	GO:0005813,GO:0005825,GO:0005643,GO:0005634,GO:0070390,GO:0005509,GO:0042802,GO:0008017,GO:0005200,GO:0019722,GO:0051301,GO:0007020,GO:1903087,GO:0051028,GO:0043161,GO:0015031,GO:0043549,GO:0030474	centrosome|half bridge of spindle pole body|nuclear pore|nucleus|transcription export complex 2|calcium ion binding|identical protein binding|microtubule binding|structural constituent of cytoskeleton|calcium-mediated signaling|cell division|microtubule nucleation|mitotic spindle pole body duplication|mRNA transport|proteasome-mediated ubiquitin-dependent protein catabolic process|protein transpo…
LOC115705773	22.8865	39.9753	5.79763	0.147801	-2.75827	0.000233172	0.00293026	Down	0.256034	0.108482	0.144823	0.121558	1.31795	1.00126	1.84522	0.201229	DET2		GeneID:115705773	3-oxo-5-alpha-steroid 4-dehydrogenase 2-like isoform X1	GO:0005737,GO:0016021,GO:0003865,GO:0047751,GO:0050213,GO:0016132,GO:0055114,GO:0090378,GO:0090377	cytoplasm|integral component of membrane|3-oxo-5-alpha-steroid 4-dehydrogenase activity|cholestenone 5-alpha-reductase activity|progesterone 5-alpha-reductase activity|brassinosteroid biosynthetic process|oxidation-reduction process|seed trichome elongation|seed trichome initiation
LOC115705786	374.483	719.936	29.0303	0.038473	-4.70001	1.51e-25	3.15e-23	Down	0.904567	0.663347	0.511659	2.18035	31.5992	27.0912	18.4253	29.2238			GeneID:115705786	probable glutathione S-transferase	GO:0004364,GO:0009734	glutathione transferase activity|auxin-activated signaling pathway	ko00480	Glutathione metabolism
LOC115705798	30.1962	17.5884	42.8041	2.4357	1.28433	0.00291771	0.0219845	Up	1.69914	1.68494	1.34963	1.81937	0.785729	0.374235	0.868478	0.674818			GeneID:115705798	uncharacterized protein LOC115705798
LOC115705803	82.8533	159.638	6.06828	0.0730141	-3.77568	0.00176809	0.0149324	Down	0.429233	0.0909336	0.194233	0.0271717	1.14567	0.427875	0.437458	17.43	SRC2	At1g09070	GeneID:115705803	protein SRC2 homolog	GO:0005783,GO:0005789,GO:0016021,GO:0005886,GO:0000326,GO:0032586,GO:0006623	endoplasmic reticulum|endoplasmic reticulum membrane|integral component of membrane|plasma membrane|protein storage vacuole|protein storage vacuole membrane|protein targeting to vacuole
LOC115705835	224.642	318.381	130.904	0.401243	-1.31745	0.00819087	0.0487467	Down	1.51919	3.0832	1.80528	0.678842	3.8261	2.42282	6.83074	4.27684			GeneID:115705835	uncharacterized protein LOC115705835
LOC115705847	490.947	978.315	3.57902	0.00353611	-8.14362	5.96e-50	3.47e-47	Down	0.0224159	0.0949767	0.202869	0.0212849	27.1544	14.5672	29.3482	22.1763	PPA3	At2g46860	GeneID:115705847	soluble inorganic pyrophosphatase 3 isoform X2	GO:0005737,GO:0004427,GO:0000287,GO:0019915,GO:0006796	cytoplasm|inorganic diphosphatase activity|magnesium ion binding|lipid storage|phosphate-containing compound metabolic process	ko00190	Oxidative phosphorylation
LOC115705858	1118.74	125.27	2112.21	16.8984	4.07881	2.04e-66	2.61e-63	Up	43.3506	36.1228	39.5585	36.131	2.39722	1.35461	2.72335	2.75646	VPS321	At2g19830	GeneID:115705858	vacuolar protein sorting-associated protein 32 homolog 2	GO:0000815,GO:0005886,GO:0015031,GO:0007034	ESCRT III complex|plasma membrane|protein transport|vacuolar transport	ko04144	Endocytosis
LOC115705866	1258.28	639.786	1876.77	2.93503	1.55338	8.3e-33	2.53e-30	Up	16.2732	20.7766	17.7575	16.8033	5.56286	6.32892	5.99863	6.67984		At1g76280	GeneID:115705866	pentatricopeptide repeat-containing protein At1g76280
LOC115705870	1073.43	1959.16	187.703	0.099832	-3.32435	6.06e-11	3.47e-09	Down	4.29298	4.05039	4.67079	5.63565	82.8924	49.4857	10.2465	50.9796			GeneID:115705870	peptide methionine sulfoxide reductase A1-like	GO:0008113	peptide-methionine (S)-S-oxide reductase activity
LOC115705873	549.696	770.511	328.882	0.426846	-1.22821	2.04e-23	3.74e-21	Down	8.19951	7.19113	7.85462	7.49278	15.9854	19.9776	19.5196	17.0204	CDA1	At2g19570	GeneID:115705873	cytidine deaminase 1-like	GO:0005829,GO:0004126,GO:0047844,GO:0042803,GO:0008270,GO:0006216,GO:0009972	cytosol|cytidine deaminase activity|deoxycytidine deaminase activity|protein homodimerization activity|zinc ion binding|cytidine catabolic process|cytidine deamination	ko00240	Pyrimidine metabolism
LOC115705875	596.213	327.363	865.063	2.64248	1.40189	4.29e-05	0.000681067	Up	11.6966	11.5505	9.07449	8.04509	1.72439	5.21428	4.97429	3.56732	LAX2		GeneID:115705875	auxin transporter-like protein 2	GO:0016021,GO:0005886,GO:0015293,GO:0006865,GO:0009734	integral component of membrane|plasma membrane|symporter activity|amino acid transport|auxin-activated signaling pathway	ko04075	Plant hormone signal transduction
LOC115705876	55.8087	28.5954	83.022	3.02767	1.59821	0.00240577	0.0190213	Up	1.27461	0.473735	0.619783	1.56065	0.243006	0.205762	0.36627	0.549221	BGAL1	At3g13750	GeneID:115705876	beta-galactosidase 1-like isoform X1	GO:0048046,GO:0005618,GO:0009505,GO:0009506,GO:0005773,GO:0004565,GO:0030246,GO:0005975	apoplast|cell wall|plant-type cell wall|plasmodesma|vacuole|beta-galactosidase activity|carbohydrate binding|carbohydrate metabolic process
LOC115705880	183.867	116.114	251.621	2.18708	1.12901	0.000137385	0.00185808	Up	9.33742	7.06481	7.7378	6.17137	4.93473	2.25244	4.30776	2.48156			GeneID:115705880	uncharacterized protein LOC115705880 isoform X1
LOC115705892	19.0517	0.501462	37.6019	73.5902	6.20144	7.26e-07	1.93e-05	Up	0.595648	1.37067	0.557664	0.741124	0	0	0.0448568	0		At2g39510	GeneID:115705892	WAT1-related protein At2g39510-like	GO:0016021,GO:0005886,GO:0015186,GO:0098712,GO:0048316	integral component of membrane|plasma membrane|L-glutamine transmembrane transporter activity|L-glutamate import across plasma membrane|seed development
LOC115705895	1711.35	2736.02	686.673	0.255232	-1.97012	0.000221901	0.00280738	Down	9.58385	4.75169	4.37241	6.75879	9.00245	21.594	58.4082	14.2263	CLPB1	At1g74310	GeneID:115705895	chaperone protein ClpB1	GO:0009941,GO:0009570,GO:0005829,GO:0005634,GO:0005524,GO:0045727,GO:0019538,GO:0043335,GO:0009408,GO:0009644,GO:0042542	chloroplast envelope|chloroplast stroma|cytosol|nucleus|ATP binding|positive regulation of translation|protein metabolic process|protein unfolding|response to heat|response to high light intensity|response to hydrogen peroxide
LOC115705897	12323.1	22990.8	1655.35	0.0749928	-3.7371	7.7e-13	5.67e-11	Down	12.1508	10.3055	13.6196	12.9096	71.5884	98.2002	441.874	80.4761	BAG6	At2g46240	GeneID:115705897	BAG family molecular chaperone regulator 6	GO:0009506,GO:0005516,GO:0051087,GO:0006914,GO:0050832,GO:0009817,GO:0012502,GO:0010508,GO:0006457,GO:0009408,GO:0009644,GO:0042542,GO:0010228	plasmodesma|calmodulin binding|chaperone binding|autophagy|defense response to fungus|defense response to fungus, incompatible interaction|induction of programmed cell death|positive regulation of autophagy|protein folding|response to heat|response to high light intensity|response to hydrogen peroxide|vegetative to reproductive phase transition of meristem
LOC115705906	15.1677	27.6579	2.67747	0.113012	-3.14545	0.00774988	0.0466426	Down	0.0838731	0	0.0759071	0.0318565	0.287828	0.328	0.0549516	1.30192			GeneID:115705906	uncharacterized protein LOC115705906
LOC115705916	261.564	146.964	376.163	2.56585	1.35944	1.75e-07	5.56e-06	Up	6.24701	6.67961	5.21699	5.34422	1.39886	2.99952	2.46152	2.41727	RSS3	Os11g0446000	GeneID:115705916	protein RICE SALT SENSITIVE 3-like	GO:0005737,GO:0005634	cytoplasm|nucleus
LOC115705921	987.328	622.776	1351.88	2.15639	1.10862	9e-17	9.94e-15	Up	22.542	23.2947	21.0763	16.1635	9.01511	9.91455	9.96622	9.57859	RSS3	Os11g0446000	GeneID:115705921	protein RICE SALT SENSITIVE 3-like	GO:0005737,GO:0005634	cytoplasm|nucleus
LOC115705925	298.4	409.056	187.745	0.475023	-1.07393	0.00388879	0.0276196	Down	1.22289	1.6556	1.43254	1.44289	2.85567	2.06407	1.83313	5.8222	CSLD3	At3g03050	GeneID:115705925	LOW QUALITY PROTEIN: cellulose synthase-like protein D3	GO:0005783,GO:0005768,GO:0005794,GO:0000139,GO:0016021,GO:0005886,GO:0005802,GO:0016760,GO:0051753,GO:0071555,GO:0030244,GO:0009833,GO:0009409	endoplasmic reticulum|endosome|Golgi apparatus|Golgi membrane|integral component of membrane|plasma membrane|trans-Golgi network|cellulose synthase (UDP-forming) activity|mannan synthase activity|cell wall organization|cellulose biosynthetic process|plant-type primary cell wall biogenesis|response to cold
LOC115705934	221.711	392.48	50.942	0.131755	-2.92407	8.91e-09	3.69e-07	Down	0.3622	0.426292	0.626006	0.754725	6.9514	4.20073	1.41724	4.08225	CRSP	At1g20160	GeneID:115705934	CO(2)-response secreted protease-like isoform X1	GO:0048046,GO:0005618,GO:0004252,GO:0008236,GO:1900425,GO:2000122,GO:0006508,GO:2000038,GO:0010037	apoplast|cell wall|serine-type endopeptidase activity|serine-type peptidase activity|negative regulation of defense response to bacterium|negative regulation of stomatal complex development|proteolysis|regulation of stomatal complex development|response to carbon dioxide
LOC115705964	143.487	66.7505	220.224	3.3471	1.74291	0.000106826	0.00151075	Up	7.72236	9.19715	12.1763	8.28255	4.02776	1.33464	4.28178	1.6903			GeneID:115705964	uncharacterized protein LOC115705964 isoform X2
LOC115705967	97.589	40.4493	154.729	3.84247	1.94203	0.00281709	0.0215119	Up	3.60036	2.37608	3.41195	2.98913	0.776254	0.151769	1.83193	0.500011			GeneID:115705967	uncharacterized protein LOC115705967
LOC115706002	47.6382	6.69521	88.5813	13.3078	3.7342	3.03e-10	1.57e-08	Up	1.77929	1.11576	1.33655	1.12184	0.097696	0.0654891	0.0310866	0.209764	SKS1	At4g25240	GeneID:115706002	monocopper oxidase-like protein SKS1	GO:0031225,GO:0046658,GO:0005886,GO:0009506,GO:0005507,GO:0016722	anchored component of membrane|anchored component of plasma membrane|plasma membrane|plasmodesma|copper ion binding|oxidoreductase activity, oxidizing metal ions
LOC115706006	29.0886	58.1772	0	0.00333055	-8.23002	5.99e-13	4.48e-11	Down	0	0	0	0	0.453123	0.801886	1.28034	1.41655	NFD4	At1g31470	GeneID:115706006	protein NUCLEAR FUSION DEFECTIVE 4-like	GO:0016021,GO:0005739,GO:0000741,GO:0010197,GO:0009651	integral component of membrane|mitochondrion|karyogamy|polar nucleus fusion|response to salt stress
LOC115706025	1892.3	1232.86	2551.73	2.05913	1.04204	1.17e-07	3.84e-06	Up	31.1005	36.8104	41.6935	41.0289	20.2266	18.5269	13.4046	20.8485			GeneID:115706025	uncharacterized protein LOC115706025			ko03410	Base excision repair
LOC115706045	164.622	233.04	96.2039	0.416413	-1.26391	7.04e-06	0.000144516	Down	1.19042	0.98075	1.71398	1.0276	3.03982	3.87255	2.71796	2.3154	ESK1	At3g55990	GeneID:115706045	LOW QUALITY PROTEIN: protein ESKIMO 1-like	GO:0005794,GO:0000139,GO:0016021,GO:0016413,GO:1990538,GO:0045893,GO:0009409,GO:0050826,GO:0045492	Golgi apparatus|Golgi membrane|integral component of membrane|O-acetyltransferase activity|xylan O-acetyltransferase activity|positive regulation of transcription, DNA-templated|response to cold|response to freezing|xylan biosynthetic process
LOC115706052	86.5347	54.1706	118.899	2.19558	1.1346	8.78e-07	2.28e-05	Up	3.34654	4.15253	4.03826	4.50929	1.67708	1.46635	2.08816	2.12921	rpc11		GeneID:115706052	DNA-directed RNA polymerase III subunit RPC10-like	GO:0005829,GO:0005730,GO:0005634,GO:0005666,GO:0003677,GO:0003899,GO:0008270,GO:0006386,GO:0006384,GO:0042779	cytosol|nucleolus|nucleus|RNA polymerase III complex|DNA binding|DNA-directed 5'-3' RNA polymerase activity|zinc ion binding|termination of RNA polymerase III transcription|transcription initiation from RNA polymerase III promoter|tRNA 3'-trailer cleavage	ko03020	RNA polymerase
LOC115706054	928.584	70.0074	1787.16	25.5335	4.67432	4.95e-50	2.97e-47	Up	26.5137	27.8005	26.9901	25.699	1.29266	0.471168	1.48075	0.957541	TS1	At4g29840	GeneID:115706054	threonine synthase 1, chloroplastic-like	GO:0009507,GO:0009570,GO:0005737,GO:0005829,GO:0030170,GO:0004795,GO:0009088	chloroplast|chloroplast stroma|cytoplasm|cytosol|pyridoxal phosphate binding|threonine synthase activity|threonine biosynthetic process	ko00260,ko00750	Glycine, serine and threonine metabolism|Vitamin B6 metabolism
LOC115706056	1280.7	340.197	2221.2	6.62712	2.72838	3.17e-10	1.63e-08	Up	54.4746	46.4931	65.0356	44.4971	3.09014	14.4059	4.72946	10.3745	PPA3	At2g46860	GeneID:115706056	soluble inorganic pyrophosphatase 3 isoform X2	GO:0005737,GO:0004427,GO:0000287,GO:0019915,GO:0006796	cytoplasm|inorganic diphosphatase activity|magnesium ion binding|lipid storage|phosphate-containing compound metabolic process	ko00190	Oxidative phosphorylation
LOC115706066	90.3812	123.679	57.0839	0.459335	-1.12238	0.00129142	0.0116221	Down	1.22512	1.31934	1.57074	0.833699	3.03639	1.71443	3.32214	2.66797			GeneID:115706066	uncharacterized protein LOC115706066 isoform X2
LOC115706075	700.832	370.061	1031.6	2.78724	1.47884	2.44e-29	6.79e-27	Up	8.81292	10.5738	9.65861	8.54787	2.99975	3.48105	3.74606	3.35343	MKP1	At3g55270	GeneID:115706075	LOW QUALITY PROTEIN: protein-tyrosine-phosphatase MKP1-like	GO:0005829,GO:0017017,GO:0004725,GO:0006952,GO:1902065,GO:0009651,GO:0010224,GO:0010225	cytosol|MAP kinase tyrosine/serine/threonine phosphatase activity|protein tyrosine phosphatase activity|defense response|response to L-glutamate|response to salt stress|response to UV-B|response to UV-C
LOC115706107	208.636	412.401	4.87001	0.0127939	-6.28841	3.59e-10	1.83e-08	Down	0.340924	0.0802501	0.25712	0.107907	40.2116	9.32396	0.248183	15.3326	ERF106	At5g07580	GeneID:115706107	ethylene-responsive transcription factor ERF106-like	GO:0005634,GO:0003677,GO:0003700,GO:0009873	nucleus|DNA binding|DNA-binding transcription factor activity|ethylene-activated signaling pathway
LOC115706108	486.854	660.953	312.755	0.469029	-1.09225	0.0012219	0.0111269	Down	4.37332	2.27345	2.81965	5.80715	5.96622	10.5116	9.16035	7.00589	CSLA9	At5g03760	GeneID:115706108	glucomannan 4-beta-mannosyltransferase 9-like	GO:0000139,GO:0016021,GO:0047259,GO:0051753,GO:0071555,GO:0009294,GO:0009617	Golgi membrane|integral component of membrane|glucomannan 4-beta-mannosyltransferase activity|mannan synthase activity|cell wall organization|DNA mediated transformation|response to bacterium
LOC115706124	150.995	206.668	95.3218	0.424502	-1.23616	0.00243816	0.0192221	Down	0.633476	0.623925	1.49614	1.73067	2.78412	2.531	1.58976	2.8497	BGAL1	At3g13750	GeneID:115706124	LOW QUALITY PROTEIN: beta-galactosidase 1-like	GO:0048046,GO:0005618,GO:0009505,GO:0009506,GO:0005773,GO:0004565,GO:0030246,GO:0005975	apoplast|cell wall|plant-type cell wall|plasmodesma|vacuole|beta-galactosidase activity|carbohydrate binding|carbohydrate metabolic process
LOC115706127	26.6244	8.13995	45.1088	5.95761	2.57473	0.000123821	0.00169977	Up	1.01994	0.659212	0.606251	1.01772	0.316395	0.0994176	0.0377535	0.135867	IPN2		GeneID:115706127	LOW QUALITY PROTEIN: myb family transcription factor APL-like
LOC115706131	3082.86	4179.69	1986.03	0.475069	-1.07379	1.49e-46	7.33e-44	Down	39.0537	35.1756	37.4291	35.2936	75.0148	78.7394	75.8196	81.244	VPS321	At2g19830	GeneID:115706131	vacuolar protein sorting-associated protein 32 homolog 2	GO:0000815,GO:0005886,GO:0015031,GO:0007034	ESCRT III complex|plasma membrane|protein transport|vacuolar transport	ko04144	Endocytosis
LOC115706132	82.6993	114.743	50.6553	0.441613	-1.17915	0.00126965	0.0114585	Down	1.29815	1.48508	1.58605	1.208	2.64322	3.40433	4.79123	1.91302	MND1	At4g29170	GeneID:115706132	LOW QUALITY PROTEIN: meiotic nuclear division protein 1 homolog	GO:0005730,GO:0003690,GO:0006302,GO:0009553,GO:0009555,GO:0007131,GO:0010212	nucleolus|double-stranded DNA binding|double-strand break repair|embryo sac development|pollen development|reciprocal meiotic recombination|response to ionizing radiation
LOC115706171	125.259	0	250.518	1331	10.3783	6.67e-23	1.16e-20	Up	8.32759	7.31892	7.64589	8.73826	0	0	0	0	STP13	At5g26340	GeneID:115706171	sugar transport protein 13-like	GO:0005887,GO:0005886,GO:0009506,GO:0005351,GO:0005355,GO:0009679,GO:0005358,GO:0015145,GO:0008645,GO:0015749,GO:0009737,GO:0009651,GO:0009414	integral component of plasma membrane|plasma membrane|plasmodesma|carbohydrate:proton symporter activity|glucose transmembrane transporter activity|hexose:proton symporter activity|high-affinity glucose:proton symporter activity|monosaccharide transmembrane transporter activity|hexose transmembrane transport|monosaccharide transmembrane transport|response to abscisic acid|response to salt stress|…
LOC115706180	1321.21	453.62	2188.8	4.82833	2.27152	1.23e-40	5.03e-38	Up	58.5544	50.3962	66.8861	54.2588	12.5004	13.1392	9.36219	12.8295	TPIP1		GeneID:115706180	triosephosphate isomerase, cytosolic-like	GO:0005737,GO:0004807,GO:0006094,GO:0006096	cytoplasm|triose-phosphate isomerase activity|gluconeogenesis|glycolytic process	ko00010,ko00051,ko00562,ko00710	Glycolysis / Gluconeogenesis|Fructose and mannose metabolism|Inositol phosphate metabolism|Carbon fixation in photosynthetic organisms
LOC115706207	37.4376	50.9517	23.9234	0.479733	-1.0597	0.00265566	0.0205667	Down	0.189531	0.190724	0.310899	0.269953	0.336048	0.359698	0.651925	0.716878	PCMP-H21	At1g20230	GeneID:115706207	LOW QUALITY PROTEIN: pentatricopeptide repeat-containing protein At1g20230-like
LOC115706224	520.162	955.93	84.3938	0.0897857	-3.47737	4.63e-16	4.73e-14	Down	0.593122	0.578668	0.697473	0.918898	2.12469	11.7052	10.7717	7.54447	SRO77	YBL106C	GeneID:115706224	uncharacterized protein LOC115706224	GO:0005737,GO:0005886,GO:0005096,GO:0017137,GO:0019905,GO:0030010,GO:0006887,GO:0006893,GO:0017157	cytoplasm|plasma membrane|GTPase activator activity|Rab GTPase binding|syntaxin binding|establishment of cell polarity|exocytosis|Golgi to plasma membrane transport|regulation of exocytosis
LOC115706225	14361.4	28155.8	566.95	0.0198025	-5.65818	3.24e-208	6.22e-204	Down	7.32954	6.73564	7.87796	11.8088	392.516	359.757	522.689	414.798	CYP78A3		GeneID:115706225	cytochrome P450 78A3-like	GO:0016020,GO:0020037,GO:0005506,GO:0016709	membrane|heme binding|iron ion binding|oxidoreductase activity,acting on paired donors, with incorporation or reduction of molecular oxygen, NAD(P)H as one donor, and incorporation of one atom of oxygen
LOC115706232	481.158	649.948	312.368	0.481485	-1.05444	7.97e-06	0.000161706	Down	3.83396	5.3465	4.36649	3.54246	6.88123	8.73054	12.1649	8.1166	ARP1	At3g54770	GeneID:115706232	RNA-binding protein 38	GO:0005634,GO:0003729,GO:0010029,GO:0009737,GO:0009651,GO:0009414	nucleus|mRNA binding|regulation of seed germination|response to abscisic acid|response to salt stress|response to water deprivation
LOC115706241	910.615	526.388	1294.84	2.46687	1.30268	6.9e-10	3.35e-08	Up	33.8113	26.7942	37.1334	28.4	12.7085	9.08216	15.2895	14.3874	TET2	At2g19580	GeneID:115706241	tetraspanin-2-like	GO:0016021,GO:0005886,GO:0009506	integral component of membrane|plasma membrane|plasmodesma
LOC115706260	21.3946	36.2245	6.56482	0.184759	-2.43628	0.00166967	0.014296	Down	0.561115	0.0495304	0.476083	0.222002	2.62093	1.18322	2.60404	0.780949	SAUR32	At2g46690	GeneID:115706260	auxin-responsive protein SAUR32	GO:0005737,GO:0005634,GO:0009734,GO:0007275,GO:0040008,GO:1900140	cytoplasm|nucleus|auxin-activated signaling pathway|multicellular organism development|regulation of growth|regulation of seedling development
LOC115706280	1052.74	1550.41	555.081	0.372133	-1.42611	1.93e-05	0.000344954	Down	8.53267	5.30783	6.04992	5.71795	14.5475	10.4769	16.4626	30.2848	CNGC13	At4g01010	GeneID:115706280	cyclic nucleotide-gated ion channel 1-like	GO:0016021,GO:0005886,GO:0005516,GO:0030552,GO:0030553,GO:0005216	integral component of membrane|plasma membrane|calmodulin binding|cAMP binding|cGMP binding|ion channel activity	ko04626	Plant-pathogen interaction
LOC115706281	142.818	194.911	90.7252	0.471475	-1.08475	0.00209291	0.0170894	Down	1.25279	0.84677	1.34977	1.14426	2.74331	3.47202	1.34194	2.33263	CNGC3	At2g46430	GeneID:115706281	cyclic nucleotide-gated ion channel 1-like	GO:0016021,GO:0005886,GO:0005516,GO:0030552,GO:0030553,GO:0005216	integral component of membrane|plasma membrane|calmodulin binding|cAMP binding|cGMP binding|ion channel activity	ko04626	Plant-pathogen interaction
LOC115706288	4224	5781.71	2666.29	0.467967	-1.09552	0.0015079	0.0132113	Down	82.1972	45.5542	39.6635	56.093	203.854	62.6725	108.445	107.179		At4g27520	GeneID:115706288	early nodulin-like protein 2	GO:0031225,GO:0046658,GO:0048046,GO:0009507,GO:0005886,GO:0005773,GO:0009055	anchored component of membrane|anchored component of plasma membrane|apoplast|chloroplast|plasma membrane|vacuole|electron transfer activity
LOC115706301	229.444	453.502	5.38592	0.0121305	-6.36522	9.72e-07	2.5e-05	Down	0.0931736	0.197389	0.0632432	0.0707779	18.332	6.02284	0.0406967	10.9844	LPL1	YOR059C	GeneID:115706301	putative lipase ROG1
LOC115706304	215.621	426.207	5.03537	0.0103719	-6.59118	1.56e-15	1.51e-13	Down	0.0176502	0.112177	0.0599019	0.184356	2.62471	18.4944	1.90805	9.29431	UBA1C	At2g19380	GeneID:115706304	UBP1-associated proteins 1C-like	GO:0005634,GO:1990904,GO:0003723,GO:0008270	nucleus|ribonucleoprotein complex|RNA binding|zinc ion binding
LOC115706313	145.192	200.068	90.3167	0.451655	-1.14671	6.37e-06	0.000133167	Down	1.64356	1.87199	1.49946	1.74522	3.47712	3.25233	5.17182	3.19465	ROMT-15	Os08g0498100	GeneID:115706313	O-methyltransferase MdmC-like isoform X1	GO:0005634,GO:0046872,GO:0008171,GO:0008757,GO:0032259	nucleus|metal ion binding|O-methyltransferase activity|S-adenosylmethionine-dependent methyltransferase activity|methylation
LOC115706327	2336.21	1380.85	3291.58	2.31132	1.20871	0.00303299	0.0226472	Up	59.0361	31.5571	123.498	80.2677	24.9028	44.1952	18.2314	36.7355			GeneID:115706327	glycine-rich cell wall structural protein-like isoform X1
LOC115706331	176.957	3.80476	350.109	112.967	6.81975	1.82e-26	4.16e-24	Up	7.39689	7.18576	7.40586	7.36171	0.203615	0.0909934	0	0.0194303			GeneID:115706331	uncharacterized protein LOC115706331
LOC115706345	712.254	275.025	1149.48	4.15497	2.05484	6e-47	3.03e-44	Up	33.8414	32.1688	27.6619	25.5168	6.18149	7.48112	8.03684	7.01453	LBD19	At2g45410	GeneID:115706345	LOB domain-containing protein 19	GO:0005634,GO:0045893	nucleus|positive regulation of transcription, DNA-templated
LOC115706384	1430.94	2200.74	661.143	0.382654	-1.38589	0.0043462	0.0301223	Down	23.763	17.1176	18.6188	24.0362	27.1825	43.0729	28.7156	180.965	LEA14-A		GeneID:115706384	desiccation protectant protein Lea14 homolog	GO:0009269	response to desiccation
LOC115706387	695.097	971.523	418.671	0.443899	-1.1717	0.000277721	0.00338494	Down	7.35687	7.88017	8.26668	5.79529	15.2649	11.5165	12.1942	29.1698	WRKY22	At4g01250	GeneID:115706387	WRKY transcription factor 22-like	GO:0005634,GO:0003700,GO:0043565,GO:0044212,GO:0006952,GO:0010150,GO:0010200	nucleus|DNA-binding transcription factor activity|sequence-specific DNA binding|transcription regulatory region DNA binding|defense response|leaf senescence|response to chitin	ko04016,ko04626	MAPK signaling pathway - plant|Plant-pathogen interaction
LOC115706390	369.794	7.03922	732.548	103.499	6.69347	7.45e-88	1.79e-84	Up	13.0759	13.2698	13.4354	13.4251	0.0588108	0.157692	0.149707	0.151528			GeneID:115706390	uncharacterized protein LOC115706390
LOC115706394	166.005	35.4547	296.554	8.36568	3.06448	6.07e-51	3.89e-48	Up	5.02556	5.58395	5.76483	5.70637	0.603016	0.626545	0.614009	0.811371	OPR3		GeneID:115706394	12-oxophytodienoate reductase 3-like	GO:0005777,GO:0016629,GO:0010181,GO:0042802,GO:0009695,GO:0031408,GO:0009620,GO:0010193,GO:0048443	peroxisome|12-oxophytodienoate reductase activity|FMN binding|identical protein binding|jasmonic acid biosynthetic process|oxylipin biosynthetic process|response to fungus|response to ozone|stamen development	ko00592	alpha-Linolenic acid metabolism
LOC115706424	5156.45	6908.95	3403.94	0.49422	-1.01677	1.87e-05	0.000336653	Down	80.8593	74.0875	84.9871	92.2622	145.026	225.477	201.864	108.173	LHCB43	At2g40100	GeneID:115706424	chlorophyll a-b binding protein CP29.3, chloroplastic	GO:0009507,GO:0009941,GO:0009534,GO:0009535,GO:0016021,GO:0016020,GO:0009522,GO:0009523,GO:0010287,GO:0009579,GO:0016168,GO:0046872,GO:0009768,GO:0018298,GO:0009637,GO:0010218,GO:0009416,GO:0010114	chloroplast|chloroplast envelope|chloroplast thylakoid|chloroplast thylakoid membrane|integral component of membrane|membrane|photosystem I|photosystem II|plastoglobule|thylakoid|chlorophyll binding|metal ion binding|photosynthesis, light harvesting in photosystem I|protein-chromophore linkage|response to blue light|response to far red light|response to light stimulus|response to red light	ko00196	Photosynthesis - antenna proteins
LOC115706440	105.193	200.356	10.0301	0.0506002	-4.30471	1.24e-19	1.66e-17	Down	0.303375	0.278505	0.0457602	0.230454	3.03074	4.02445	5.41078	4.86807			GeneID:115706440	anthranilate N-methyltransferase-like	GO:0030774,GO:0008171,GO:0046983	anthranilate N-methyltransferase activity|O-methyltransferase activity|protein dimerization activity	ko00940	Phenylpropanoid biosynthesis
LOC115706442	2304.48	1534.53	3074.43	2.00305	1.0022	5.67e-29	1.51e-26	Up	118.826	113.143	129.38	107.606	56.4846	60.1462	57.8469	60.7365	RPL14B	At4g27090	GeneID:115706442	60S ribosomal protein L14-2-like	GO:0009507,GO:0005829,GO:0022625,GO:0022626,GO:0005783,GO:0005730,GO:0009506,GO:0042788,GO:0005774,GO:0005773,GO:0003729,GO:0003723,GO:0003735,GO:0042273,GO:0006412	chloroplast|cytosol|cytosolic large ribosomal subunit|cytosolic ribosome|endoplasmic reticulum|nucleolus|plasmodesma|polysomal ribosome|vacuolar membrane|vacuole|mRNA binding|RNA binding|structural constituent of ribosome|ribosomal large subunit biogenesis|translation	ko03010	Ribosome
LOC115706443	8.73205	0	17.4641	92.5716	6.5325	2.05e-06	4.87e-05	Up	0.397792	0.495722	0.529428	0.311065	0	0	0	0			GeneID:115706443	uncharacterized protein LOC115706443 isoform X3
LOC115706451	48.9975	29.2816	68.7133	2.3988	1.26231	0.000338864	0.00399502	Up	1.86347	1.81598	1.54594	2.00537	0.99476	0.943078	0.515491	0.634655	SYP71	At3g09740	GeneID:115706451	syntaxin-71-like	GO:0012505,GO:0005783,GO:0016021,GO:0005886,GO:0009506,GO:0031201,GO:0008565,GO:0005484,GO:0000149,GO:0006886,GO:0006612,GO:0048278,GO:0006906	endomembrane system|endoplasmic reticulum|integral component of membrane|plasma membrane|plasmodesma|SNARE complex|protein transporter activity|SNAP receptor activity|SNARE binding|intracellular protein transport|protein targeting to membrane|vesicle docking|vesicle fusion	ko04130	SNARE interactions in vesicular transport
LOC115706454	147.929	289.385	6.47167	0.0238583	-5.38936	6.67e-21	1e-18	Down	0.268556	0.106676	0.455718	0.0956273	5.06884	6.6412	17.4119	12.5653	ERF023	At1g01250	GeneID:115706454	ethylene-responsive transcription factor ERF023-like	GO:0005634,GO:0003677,GO:0003700,GO:0009873	nucleus|DNA binding|DNA-binding transcription factor activity|ethylene-activated signaling pathway
LOC115706474	587.904	180.219	995.588	5.52246	2.46531	5.39e-23	9.58e-21	Up	20.1014	15.9964	17.525	17.9284	3.80003	1.94946	3.86807	3.36354	PXN	At2g39970	GeneID:115706474	peroxisomal nicotinamide adenine dinucleotide carrier-like	GO:0046861,GO:0016021,GO:0005777,GO:0005774,GO:0015297,GO:0043132,GO:0044375	glyoxysomal membrane|integral component of membrane|peroxisome|vacuolar membrane|antiporter activity|NAD transport|regulation of peroxisome size	ko04146	Peroxisome
LOC115706477	562.068	764.975	359.162	0.470014	-1.08923	0.00069741	0.00705485	Down	11.5933	6.08696	8.11893	12.3903	16.1894	30.7964	18.441	16.6653			GeneID:115706477	uncharacterized protein LOC115706477
LOC115706529	10.8082	21.3524	0.263894	0.0139879	-6.15968	0.000293423	0.00353526	Down	0	0	0.0236566	0	0.90898	0.240522	0.0228343	0.698496			GeneID:115706529	uncharacterized protein LOC115706529
LOC115706534	10.5981	0.780768	20.4153	26.4686	4.72621	0.000306656	0.00368083	Up	0.5205	0.601465	0.10706	0.808753	0.0270637	0	0.0516695	0	KWL1		GeneID:115706534	uncharacterized protein LOC115706534
LOC115706543	108.742	168.671	48.8134	0.289928	-1.78623	0.000142318	0.00191143	Down	2.95403	0.87614	1.51496	2.80498	5.04614	10.5103	5.97825	6.88773	HB2		GeneID:115706543	non-symbiotic hemoglobin 2	GO:0020037,GO:0046872,GO:0019825	heme binding|metal ion binding|oxygen binding
LOC115706549	290.008	470.05	109.965	0.243162	-2.04001	5.06e-13	3.84e-11	Down	3.09767	2.80272	1.46014	2.65541	14.0507	12.6929	9.98315	6.23444	SDR1	At3g61220	GeneID:115706549	uncharacterized protein LOC115704491	GO:0005737,GO:0047501,GO:0006952,GO:0055114	cytoplasm|(+)-neomenthol dehydrogenase activity|defense response|oxidation-reduction process	ko00902	Monoterpenoid biosynthesis
LOC115706566	62.9127	103.644	22.181	0.214032	-2.2241	1.02e-09	4.88e-08	Down	0.717969	0.393369	0.7282	0.493676	2.77538	2.39199	2.24384	3.50246	SAT5	At5g56760	GeneID:115706566	serine acetyltransferase 5-like	GO:0005829,GO:0009001,GO:0006535	cytosol|serine O-acetyltransferase activity|cysteine biosynthetic process from serine	ko00270,ko00920	Cysteine and methionine metabolism|Sulfur metabolism
LOC115706576	241.426	421.896	60.9565	0.146013	-2.77583	2.2e-05	0.000385769	Down	0.626368	0.643679	0.549955	0.594764	7.23989	2.75275	0.53084	6.05261	PUB52	At5g61550	GeneID:115706576	U-box domain-containing protein 35-like isoform X1
LOC115706578	209.897	305.657	114.137	0.366411	-1.44846	0.00187638	0.0156678	Down	1.40938	1.39226	2.09602	2.75173	6.39444	6.90321	1.85025	5.38293	MAN6	At5g01930	GeneID:115706578	mannan endo-1,4-beta-mannosidase 6-like isoform X1	GO:0005576,GO:0016985,GO:0046355,GO:0009845	extracellular region|mannan endo-1,4-beta-mannosidase activity|mannan catabolic process|seed germination	ko00051	Fructose and mannose metabolism
LOC115706581	126.921	191.147	62.6938	0.329096	-1.60342	0.000767296	0.00762728	Down	0.791899	0.965919	0.746549	0.683584	2.75874	3.38115	0.733702	2.86441	TMKL1	At3g24660	GeneID:115706581	putative kinase-like protein TMKL1	GO:0016021,GO:0005886,GO:0009506,GO:0005524,GO:0004672	integral component of membrane|plasma membrane|plasmodesma|ATP binding|protein kinase activity
LOC115706584	136.389	271.801	0.976396	0.00369299	-8.081	5.14e-09	2.22e-07	Down	0.0205701	0.021789	0.0232705	0.0195322	9.88266	6.34078	0	7.31556	CBP3	YPL215W	GeneID:115706584	ubiquinol-cytochrome-c reductase complex assembly factor 1-like	GO:0061671,GO:0032592,GO:0005761,GO:0005739,GO:0043022,GO:0034551,GO:0070131	Cbp3p-Cbp6 complex|integral component of mitochondrial membrane|mitochondrial ribosome|mitochondrion|ribosome binding|mitochondrial respiratory chain complex III assembly|positive regulation of mitochondrial translation
LOC115706585	97.6542	193.498	1.81059	0.00875076	-6.83638	2.59e-07	7.84e-06	Down	0	0	0.138086	0.0193172	6.28322	5.75622	0.0888578	4.49692	APS1		GeneID:115706585	acid phosphatase 1-like	GO:0003993	acid phosphatase activity
LOC115706598	449.386	678.908	219.864	0.328068	-1.60793	7.74e-06	0.000157166	Down	3.14359	2.31448	4.41744	3.27946	6.27277	13.8793	5.86479	14.8879	NTL9	At4g35580	GeneID:115706598	NAC domain-containing protein 71-like	GO:0005789,GO:0016021,GO:0005634,GO:0005886,GO:0005516,GO:0003700,GO:0044212,GO:0071470,GO:0045892,GO:1900426,GO:0031347,GO:0006355	endoplasmic reticulum membrane|integral component of membrane|nucleus|plasma membrane|calmodulin binding|DNA-binding transcription factor activity|transcription regulatory region DNA binding|cellular response to osmotic stress|negative regulation of transcription, DNA-templated|positive regulation of defense response to bacterium|regulation of defense response|regulation of transcription, DNA-tem…
LOC115706613	8.11772	2.90363	13.3318	4.87146	2.28435	0.00662666	0.0415115	Up	0.238217	0.378499	0.296439	0.429775	0.136248	0.0821989	0.0260123	0.0468064	WRKY24	At5g41570	GeneID:115706613	probable WRKY transcription factor 12	GO:0005634,GO:0003700,GO:0043565	nucleus|DNA-binding transcription factor activity|sequence-specific DNA binding
LOC115706617	171.394	89.8269	252.962	2.9253	1.54859	0.000898131	0.00864158	Up	6.222	5.70716	4.87106	7.34226	0.541537	2.87817	3.24938	2.05971			GeneID:115706617	uncharacterized protein LOC115706617 isoform X1
LOC115706679	27.1373	9.63449	44.64	4.85427	2.27925	0.00356911	0.0257784	Up	1.5132	1.77616	2.86852	1.59219	0.935653	0.0940802	0.133975	0.482148			GeneID:115706679	uncharacterized protein LOC115706679
LOC115706682	37.5163	75.0325	0	0.00247399	-8.65894	0.00660551	0.0414301	Down	0	0	0	0	0	3.30412	3.26974	1.33935		At3g53850	GeneID:115706682	CASP-like protein 5B2 isoform X1	GO:0016021,GO:0005886	integral component of membrane|plasma membrane
LOC115706690	1778.07	2527.14	1029	0.406993	-1.29693	7.71e-36	2.74e-33	Down	26.1139	26.3972	25.8626	23.7076	58.1107	62.5752	72.438	59.1953	TON1B	At3g55005	GeneID:115706690	protein TONNEAU 1b-like	GO:0030981,GO:0005737,GO:0005886,GO:0030865,GO:0000226,GO:0000913	cortical microtubule cytoskeleton|cytoplasm|plasma membrane|cortical cytoskeleton organization|microtubule cytoskeleton organization|preprophase band assembly
LOC115706691	519.623	9.74176	1029.5	106.408	6.73346	2.97e-82	5.71e-79	Up	15.5211	12.2706	19.273	14.8052	0.064798	0.195464	0.108247	0.222606	HEXO1	At3g55260	GeneID:115706691	beta-hexosaminidase 1-like	GO:0005829,GO:0009505,GO:0005773,GO:0004563,GO:0015929,GO:0102148,GO:0005975	cytosol|plant-type cell wall|vacuole|beta-N-acetylhexosaminidase activity|hexosaminidase activity|N-acetyl-beta-D-galactosaminidase activity|carbohydrate metabolic process	ko00511,ko00513,ko00520,ko00531,ko00603,ko00604	Other glycan degradation|Various types of N-glycan biosynthesis|Amino sugar and nucleotide sugar metabolism|Glycosaminoglycan degradation|Glycosphingolipid biosynthesis - globo and isoglobo series|Glycosphingolipid biosynthesis - ganglio series
LOC115706709	242.285	409.778	74.7916	0.182607	-2.45319	2.46e-12	1.7e-10	Down	1.10382	1.26784	1.0381	0.808192	2.93606	8.00006	7.17385	5.29148		At3g47420	GeneID:115706709	putative glycerol-3-phosphate transporter 1	GO:0016021,GO:0022857,GO:0008643,GO:0055062	integral component of membrane|transmembrane transporter activity|carbohydrate transport|phosphate ion homeostasis
LOC115706710	4.51099	0	9.02199	46.8745	5.55073	0.00533683	0.0353427	Up	0.115696	0.449356	0.0218141	0.146478	0	0	0	0	PME63	At5g61680	GeneID:115706710	putative pectinesterase 63	GO:0005618,GO:0005576,GO:0045330,GO:0030599,GO:0042545,GO:0045490	cell wall|extracellular region|aspartyl esterase activity|pectinesterase activity|cell wall modification|pectin catabolic process	ko00040	Pentose and glucuronate interconversions
LOC115706731	1189.66	2142.32	237.003	0.124418	-3.00673	0.00653946	0.0411907	Down	3.56687	3.46539	2.24888	2.13569	2.32595	7.5258	88.7262	7.07539	HSP83A		GeneID:115706731	heat shock protein 83	GO:0005737,GO:0005524,GO:0051082,GO:0006457	cytoplasm|ATP binding|unfolded protein binding|protein folding	ko04141,ko04626	Protein processing in endoplasmic reticulum|Plant-pathogen interaction
LOC115706733	847.895	1455.23	240.56	0.164901	-2.60033	3.21e-69	4.74e-66	Down	2.7674	2.12352	3.19233	3.03124	15.7035	17.7198	17.5126	16.6873			GeneID:115706733	bifunctional dihydrofolate reductase-thymidylate synthase-like	GO:0004146,GO:0004799,GO:0006231,GO:0006730,GO:0046654	dihydrofolate reductase activity|thymidylate synthase activity|dTMP biosynthetic process|one-carbon metabolic process|tetrahydrofolate biosynthetic process	ko00240,ko00670,ko00790	Pyrimidine metabolism|One carbon pool by folate|Folate biosynthesis
LOC115706735	237.754	469.913	5.59462	0.0118132	-6.40346	1.88e-42	7.87e-40	Down	0.160745	0.034054	0.127293	0.0610537	5.40596	11.2782	7.75827	7.89604	LYSA2	At5g11880	GeneID:115706735	diaminopimelate decarboxylase 2, chloroplastic-like	GO:0009507,GO:0009570,GO:0005829,GO:0008836,GO:0009089	chloroplast|chloroplast stroma|cytosol|diaminopimelate decarboxylase activity|lysine biosynthetic process via diaminopimelate	ko00300	Lysine biosynthesis
LOC115706743	448.908	262.002	635.815	2.42464	1.27777	2.28e-05	0.00039885	Up	10.9964	10.0302	12.7279	11.9884	3.10586	7.41702	3.3169	5.18486		At4g31810	GeneID:115706743	3-hydroxyisobutyryl-CoA hydrolase-like protein 2, mitochondrial	GO:0005739,GO:0003860,GO:0006635	mitochondrion|3-hydroxyisobutyryl-CoA hydrolase activity|fatty acid beta-oxidation	ko00280,ko00410,ko00640	Valine, leucine and isoleucine degradation|beta-Alanine metabolism|Propanoate metabolism
LOC115706744	166.366	284.001	48.7301	0.170248	-2.55429	1.69e-15	1.63e-13	Down	0.564531	0.949739	1.12702	0.788305	5.14715	3.89593	6.83528	4.22486		At4g31810	GeneID:115706744	3-hydroxyisobutyryl-CoA hydrolase-like protein 2, mitochondrial	GO:0005739,GO:0003860,GO:0006635	mitochondrion|3-hydroxyisobutyryl-CoA hydrolase activity|fatty acid beta-oxidation	ko00280,ko00410,ko00640	Valine, leucine and isoleucine degradation|beta-Alanine metabolism|Propanoate metabolism
LOC115706747	891.796	147.932	1635.66	11.122	3.47535	1.59e-65	1.91e-62	Up	33.2637	30.7033	30.6575	26.5118	2.47677	2.00839	2.93631	3.58529			GeneID:115706747	uncharacterized protein LOC115705487
LOC115706754	4599.1	7451.93	1746.28	0.234044	-2.09515	2.85e-21	4.38e-19	Down	37.3777	29.7946	52.8439	35.8311	148.758	184.395	204.304	131.787	PIP2-2	At2g37170	GeneID:115706754	aquaporin PIP2-2-like	GO:0009507,GO:0016021,GO:0005886,GO:0009506,GO:0005773,GO:0003729,GO:0015250,GO:0009737,GO:0009414,GO:0006833	chloroplast|integral component of membrane|plasma membrane|plasmodesma|vacuole|mRNA binding|water channel activity|response to abscisic acid|response to water deprivation|water transport
LOC115706759	201.831	276.964	126.697	0.461046	-1.11702	5.34e-07	1.49e-05	Down	6.25628	4.9498	3.80093	5.72059	12.2368	13.4591	10.2896	9.56103	UGT76C2	At5g05860	GeneID:115706759	UDP-glycosyltransferase 76C2-like	GO:0043231,GO:0047807,GO:0080062,GO:0080043,GO:0080044,GO:0008194,GO:1901527,GO:0042631,GO:0009690,GO:1900000,GO:0048316	intracellular membrane-bounded organelle|cytokinin 7-beta-glucosyltransferase activity|cytokinin 9-beta-glucosyltransferase activity|quercetin 3-O-glucosyltransferase activity|quercetin 7-O-glucosyltransferase activity|UDP-glycosyltransferase activity|abscisic acid-activated signaling pathway involved in stomatal movement|cellular response to water deprivation|cytokinin metabolic process|regulati…
LOC115706763	16.8227	26.4165	7.22897	0.263486	-1.9242	0.00456116	0.0311926	Down	0.628288	0.177472	0.284308	0.198862	1.00618	1.20443	0.731802	1.76945	DPB4	DEHA2G08756g	GeneID:115706763	DNA polymerase epsilon subunit 3-like	GO:0005634,GO:0003887,GO:0046982,GO:0006260	nucleus|DNA-directed DNA polymerase activity|protein heterodimerization activity|DNA replication	ko03030,ko03410,ko03420	DNA replication|Base excision repair|Nucleotide excision repair
LOC115706772	57.8514	2.3304	113.372	49.2572	5.62226	4.52e-21	6.83e-19	Up	2.12366	1.86544	2.36339	1.95093	0.0790003	0	0.0565597	0.0339245			GeneID:115706772	WD repeat-containing protein WRAP73-like	GO:0005829,GO:0072686,GO:0044732,GO:1990811,GO:0005634,GO:1990810,GO:0000070,GO:1902440	cytosol|mitotic spindle|mitotic spindle pole body|MWP complex|nucleus|microtubule anchoring at mitotic spindle pole body|mitotic sister chromatid segregation|protein localization to mitotic spindle pole body
LOC115706805	714.022	1291.86	136.178	0.102596	-3.28495	1.75e-08	6.83e-07	Down	5.39057	1.39669	1.53553	2.89071	14.4397	19.8273	59.6462	13.8874			GeneID:115706805	uncharacterized protein LOC115706805 isoform X1
LOC115706817	1797.48	3499.28	95.6775	0.0313294	-4.99634	1.72e-27	4.24e-25	Down	2.00145	2.76048	1.88683	1.80148	51.3222	22.4691	77.3121	159.802	TIFY10A	At1g19180	GeneID:115706817	protein TIFY 10A-like	GO:0005634,GO:0042742,GO:0009908,GO:0009867,GO:0009555,GO:1900067,GO:0031347,GO:2000022,GO:0009753,GO:0009611	nucleus|defense response to bacterium|flower development|jasmonic acid mediated signaling pathway|pollen development|regulation of cellular response to alkaline pH|regulation of defense response|regulation of jasmonic acid mediated signaling pathway|response to jasmonic acid|response to wounding	ko04075	Plant hormone signal transduction
LOC115706842	70.4698	2.94389	137.996	50.8143	5.66716	3.81e-20	5.19e-18	Up	3.10589	2.27917	2.79397	2.77151	0.128415	0.0215204	0.0817228	0	BASL	At5g60880	GeneID:115706842	protein BREAKING OF ASYMMETRY IN THE STOMATAL LINEAGE-like isoform X1	GO:0005938,GO:0019897,GO:0005634,GO:0005886,GO:0008356,GO:0007049,GO:0009786,GO:0010374,GO:0009826	cell cortex|extrinsic component of plasma membrane|nucleus|plasma membrane|asymmetric cell division|cell cycle|regulation of asymmetric cell division|stomatal complex development|unidimensional cell growth
LOC115706845	6.26726	12.3073	0.227224	0.0245293	-5.34935	0.00123684	0.011231	Down	0	0	0	0.0193031	0.0232541	0.514406	0.221982	0.319547			GeneID:115706845	uncharacterized protein LOC115706845
LOC115706850	138.39	220.303	56.4762	0.279842	-1.83731	0.00595571	0.0383952	Down	1.09433	1.0569	0.673615	1.02384	0.957265	2.01762	10.0869	2.26089	CYP707A4	At3g19270	GeneID:115706850	abscisic acid 8'-hydroxylase 4-like	GO:0016021,GO:0010295,GO:0020037,GO:0005506,GO:0004497,GO:0046345,GO:0055114,GO:0016125	integral component of membrane|(+)-abscisic acid 8'-hydroxylase activity|heme binding|iron ion binding|monooxygenase activity|abscisic acid catabolic process|oxidation-reduction process|sterol metabolic process	ko00906	Carotenoid biosynthesis
LOC115706852	7.96115	0.766589	15.1557	19.7841	4.30627	0.000202712	0.00261632	Up	0.308584	0.443609	0.349094	0.313943	0	0.0253523	0.0481372	0			GeneID:115706852	uncharacterized protein LOC115706852
LOC115706866	972.671	1370.19	575.155	0.416586	-1.26331	2.45e-17	2.86e-15	Down	9.72993	9.79705	12.5349	13.0154	25.2437	28.8719	29.9147	24.1156		At1g67280	GeneID:115706866	probable lactoylglutathione lyase, chloroplastic	GO:0009507,GO:0009570,GO:0010319,GO:0009579,GO:0031977,GO:0004462,GO:0046872,GO:0019243,GO:0009409	chloroplast|chloroplast stroma|stromule|thylakoid|thylakoid lumen|lactoylglutathione lyase activity|metal ion binding|methylglyoxal catabolic process to D-lactate via S-lactoyl-glutathione|response to cold	ko00620	Pyruvate metabolism
LOC115706873	40.8173	81.6345	0	0.00235858	-8.72786	4.32e-13	3.32e-11	Down	0	0	0	0	1.13209	0.996027	0.868403	3.14256			GeneID:115706873	uncharacterized protein LOC115713790
LOC115706878	158.017	241.752	74.2825	0.306886	-1.70422	0.000443306	0.00494695	Down	1.04075	0.721821	0.92508	1.21176	1.51648	6.05657	1.74526	3.52993			GeneID:115706878	serine/arginine repetitive matrix protein 1-like
LOC115706887	296.973	402.2	191.745	0.476975	-1.06802	0.000756203	0.00752481	Down	3.04812	1.77794	3.58498	2.52456	6.313	3.55227	6.90609	6.20021	HPAT3	At5g13500	GeneID:115706887	hydroxyproline O-arabinosyltransferase 3-like	GO:0005768,GO:0005794,GO:0016021,GO:0005802,GO:1990585	endosome|Golgi apparatus|integral component of membrane|trans-Golgi network|hydroxyproline O-arabinosyltransferase activity	ko00514	Other types of O-glycan biosynthesis
LOC115706910	147.213	238.304	56.1218	0.228235	-2.13141	0.00463992	0.0316666	Down	1.59526	0.768085	0.360936	0.729842	0.846051	2.60216	9.67576	1.82369	HSF30		GeneID:115706910	heat stress transcription factor A-2 isoform X1	GO:0005634,GO:0003700,GO:0043565	nucleus|DNA-binding transcription factor activity|sequence-specific DNA binding
LOC115706923	208.14	308.104	108.176	0.364235	-1.45706	0.00143651	0.0126726	Down	1.90501	2.91473	1.63628	1.62465	5.54874	2.55632	4.50708	10.4668			GeneID:115706923	uncharacterized protein LOC115706272
LOC115706954	1038.49	39.8328	2037.14	51.1398	5.67637	8.46e-46	4.06e-43	Up	52.9158	67.9003	43.7695	50.3405	1.19693	0.315207	1.63225	1.07693			GeneID:115706954	ferritin-3, chloroplastic-like	GO:0009507,GO:0009941,GO:0009570,GO:0009535,GO:0005737,GO:0016020,GO:0005739,GO:0009579,GO:0008199,GO:0008198,GO:0004322,GO:0042802,GO:0005506,GO:0009908,GO:0006880,GO:0006826,GO:0048366,GO:0015979,GO:0009617,GO:0009409,GO:0009735,GO:0042542,GO:0010039,GO:0000302	chloroplast|chloroplast envelope|chloroplast stroma|chloroplast thylakoid membrane|cytoplasm|membrane|mitochondrion|thylakoid|ferric iron binding|ferrous iron binding|ferroxidase activity|identical protein binding|iron ion binding|flower development|intracellular sequestering of iron ion|iron ion transport|leaf development|photosynthesis|response to bacterium|response to cold|response to cytokini…
LOC115706984	40.8864	13.0092	68.7635	5.45687	2.44807	3.39e-07	9.91e-06	Up	2.35692	2.93716	1.72527	3.06079	0.792965	0.398665	0.302783	0.40862	SBT34	At1g32950	GeneID:115706984	subtilisin-like protease SBT3.17	GO:0005576,GO:0004252	extracellular region|serine-type endopeptidase activity
LOC115706997	32.1821	48.4274	15.9369	0.332869	-1.58697	4.2e-05	0.000668045	Down	0.288552	0.218322	0.186533	0.234851	0.518689	0.679587	0.795218	0.850448	RNP1	At4g14300	GeneID:115706997	heterogeneous nuclear ribonucleoprotein D-like	GO:0005829,GO:0005634,GO:1990904,GO:0005681,GO:0003729,GO:0003723,GO:0006397,GO:0051028,GO:1901000,GO:2000070,GO:0008380,GO:0010228	cytosol|nucleus|ribonucleoprotein complex|spliceosomal complex|mRNA binding|RNA binding|mRNA processing|mRNA transport|regulation of response to salt stress|regulation of response to water deprivation|RNA splicing|vegetative to reproductive phase transition of meristem	ko03040	Spliceosome
LOC115707070	13.3471	1.00292	25.6913	27.2988	4.77077	0.000221898	0.00280738	Up	0.495783	1.38793	1.1618	0.807031	0	0	0.154678	0	MT2		GeneID:115707070	uncharacterized protein LOC115707070 isoform X1	GO:0016021,GO:0008168,GO:0008610,GO:0006665	integral component of membrane|methyltransferase activity|lipid biosynthetic process|sphingolipid metabolic process
LOC115707081	281.076	123.207	438.945	3.62662	1.85862	5.14e-06	0.000109675	Up	6.66093	10.1077	8.20646	6.55016	0.83368	2.92419	3.34986	1.88158	AT9		GeneID:115707081	omega-hydroxypalmitate O-feruloyl transferase	GO:0050734,GO:0102406,GO:0052325,GO:0010345	hydroxycinnamoyltransferase activity|omega-hydroxypalmitate O-sinapoyl transferase activity|cell wall pectin biosynthetic process|suberin biosynthetic process
LOC115707100	915.386	1445.61	385.165	0.265997	-1.91052	3.39e-55	2.71e-52	Down	7.90235	6.99411	7.3902	6.40309	27.7412	25.5913	25.5419	29.1909			GeneID:115707100	uncharacterized protein LOC115707100
LOC115707101	1729.25	3095.27	363.237	0.124271	-3.00843	0.000600714	0.00629047	Down	16.7474	8.70918	7.08525	9.98159	16.601	47.2527	260.695	45.1583	HSP236	At4g25200	GeneID:115707101	heat shock 22 kDa protein, mitochondrial-like isoform X1	GO:0005739,GO:0046686	mitochondrion|response to cadmium ion	ko04141	Protein processing in endoplasmic reticulum
LOC115707133	11.5343	20.9314	2.13715	0.103346	-3.27445	0.000489471	0.00533804	Down	0.0449651	0	0.033912	0.0569284	0.102871	0.448228	0.491	0.309226			GeneID:115707133	peroxisomal (S)-2-hydroxy-acid oxidase GLO4-like isoform X1	GO:0005777,GO:0010181,GO:0052853,GO:0052854,GO:0052852,GO:0042742,GO:0050665,GO:0009854	peroxisome|FMN binding|long-chain-(S)-2-hydroxy-long-chain-acid oxidase activity|medium-chain-(S)-2-hydroxy-acid oxidase activity|very-long-chain-(S)-2-hydroxy-acid oxidase activity|defense response to bacterium|hydrogen peroxide biosynthetic process|oxidative photosynthetic carbon pathway	ko00630,ko04146	Glyoxylate and dicarboxylate metabolism|Peroxisome
LOC115707161	259.093	354.929	163.257	0.460335	-1.11924	1.07e-10	5.98e-09	Down	3.67317	3.51021	3.00362	3.62053	6.85067	7.48537	9.02464	6.88388	GLIP1	At5g40990	GeneID:115707161	GDSL esterase/lipase 1-like	GO:0005615,GO:0005622,GO:0016298,GO:0042742,GO:0050832,GO:0009817,GO:0009866,GO:0009871,GO:0016042,GO:0009620,GO:0009751,GO:0009627	extracellular space|intracellular|lipase activity|defense response to bacterium|defense response to fungus|defense response to fungus, incompatible interaction|induced systemic resistance, ethylene mediated signaling pathway|jasmonic acid and ethylene-dependent systemic resistance, ethylene mediated signaling pathway|lipid catabolic process|response to fungus|response to salicylic acid|systemic a…
LOC115707221	322.544	435.379	209.708	0.485262	-1.04317	6.16e-07	1.68e-05	Down	4.16563	3.25041	3.43544	3.29117	9.71201	5.74224	7.63902	6.27926	ATL42	At4g28890	GeneID:115707221	E3 ubiquitin-protein ligase ATL42	GO:0016021,GO:0046872,GO:0004842,GO:0016567	integral component of membrane|metal ion binding|ubiquitin-protein transferase activity|protein ubiquitination
LOC115707234	147.057	223.035	71.0782	0.325446	-1.61951	9.19e-09	3.8e-07	Down	1.85781	2.14412	2.54086	1.81673	9.13496	6.57	4.72342	5.77517	DEFH21		GeneID:115707234	MADS-box protein FBP24-like isoform X1	GO:0005634,GO:0003700,GO:0046983,GO:0000977,GO:0045944,GO:0048316	nucleus|DNA-binding transcription factor activity|protein dimerization activity|RNA polymerase II regulatory region sequence-specific DNA binding|positive regulation of transcription by RNA polymerase II|seed development
LOC115707240	1283.22	1759.66	806.772	0.458209	-1.12592	2.1e-25	4.28e-23	Down	14.116	14.5111	14.8299	15.8933	27.6669	36.9857	33.0464	32.751	ABCI6	At3g10670	GeneID:115707240	ABC transporter I family member 6, chloroplastic-like	GO:0009507,GO:0009570,GO:0005524,GO:0042626,GO:0005215,GO:0009793,GO:0010027	chloroplast|chloroplast stroma|ATP binding|ATPase activity, coupled to transmembrane movement of substances|transporter activity|embryo development ending in seed dormancy|thylakoid membrane organization
LOC115707258	171.734	33.0962	310.371	8.32443	3.05735	9.78e-17	1.07e-14	Up	11.239	9.51504	3.7213	3.30369	0.651257	0.921628	0.828912	0.580044	PER10	At1g49570	GeneID:115707258	peroxidase 10-like	GO:0005576,GO:0020037,GO:0046872,GO:0004601,GO:0042744,GO:0006979	extracellular region|heme binding|metal ion binding|peroxidase activity|hydrogen peroxide catabolic process|response to oxidative stress	ko00940	Phenylpropanoid biosynthesis
LOC115707266	1153.2	1728.95	577.447	0.326113	-1.61656	1.27e-11	8.08e-10	Down	14.1033	9.67798	20.011	21.2098	40.499	55.2021	55.2492	45.2718	PMEI3	At5g20740	GeneID:115707266	pectinesterase inhibitor 3-like	GO:0048046,GO:0004857,GO:0043086,GO:1902183	apoplast|enzyme inhibitor activity|negative regulation of catalytic activity|regulation of shoot apical meristem development
LOC115707288	645.682	856.821	434.544	0.496334	-1.01062	0.00186687	0.0156087	Down	24.282	10.5207	8.29407	14.6671	29.7116	26.3794	26.4123	31.7354			GeneID:115707288	uncharacterized protein LOC115707288
LOC115707294	574.892	884.129	265.656	0.299384	-1.73993	4e-06	8.83e-05	Down	3.71293	3.83253	5.41578	4.83081	6.19914	25.6781	13.9228	14.2338	ALDH2C4	At3g24503	GeneID:115707294	aldehyde dehydrogenase family 2 member C4-like	GO:0005829,GO:0004029,GO:0050269,GO:0043878,GO:0009699	cytosol|aldehyde dehydrogenase (NAD) activity|coniferyl-aldehyde dehydrogenase activity|glyceraldehyde-3-phosphate dehydrogenase (NAD+) (non-phosphorylating) activity|phenylpropanoid biosynthetic process	ko00940	Phenylpropanoid biosynthesis
LOC115707346	214.147	427.791	0.503579	0.00224732	-8.79758	1.63e-08	6.43e-07	Down	0	0.0338577	0	0	1.90129	1.1397	1.51828	24.5565	RIPK	At2g05940	GeneID:115707346	serine/threonine-protein kinase RIPK-like
LOC115707353	100.062	137.757	62.3665	0.467871	-1.09582	0.00513039	0.0342234	Down	0.767251	0.861479	1.545	0.888817	1.14096	2.73572	1.6421	3.52766	FBX13	At4g33160	GeneID:115707353	F-box only protein 13	GO:0004842,GO:0031146	ubiquitin-protein transferase activity|SCF-dependent proteasomal ubiquitin-dependent protein catabolic process
LOC115707391	80.785	151.049	10.5209	0.0667353	-3.90541	4.51e-07	1.28e-05	Down	0.435298	0.368874	0.0492443	1.07467	9.70978	2.05278	7.51016	8.55301			GeneID:115707391	non-specific lipid-transfer protein AP10-like	GO:0008289,GO:0006869	lipid binding|lipid transport
LOC115707397	3102.07	4157.05	2047.1	0.490362	-1.02808	2.26e-06	5.31e-05	Down	46.2548	35.9273	35.8827	58.3615	95.2956	70.0854	103.84	91.0645	ACO		GeneID:115707397	1-aminocyclopropane-1-carboxylate oxidase-like	GO:0009815,GO:0031418,GO:0046872,GO:0009693,GO:0009835	1-aminocyclopropane-1-carboxylate oxidase activity|L-ascorbic acid binding|metal ion binding|ethylene biosynthetic process|fruit ripening	ko00270	Cysteine and methionine metabolism
LOC115707406	98.3271	164.898	31.756	0.195959	-2.35138	0.00246401	0.019386	Down	0.0848939	0.719395	0.492198	0.130992	2.76764	2.01392	0.440328	2.16847		At3g06530	GeneID:115707406	uncharacterized protein At3g06530-like	GO:0030686,GO:0032040,GO:0034455,GO:0030515,GO:0000462,GO:0045943	90S preribosome|small-subunit processome|t-UTP complex|snoRNA binding|maturation of SSU-rRNA from tricistronic rRNA transcript (SSU-rRNA, 5.8S rRNA, LSU-rRNA)|positive regulation of transcription by RNA polymerase I	ko03008	Ribosome biogenesis in eukaryotes
LOC115707439	261.243	438.73	83.7561	0.167178	-2.58054	6.86e-06	0.000141967	Down	1.37105	2.44311	0.376887	0.352843	10.8905	2.82971	4.65928	5.28714	TPS7		GeneID:115707439	(E,E)-alpha-farnesene synthase-like	GO:0000287,GO:0010334,GO:0051762	magnesium ion binding|sesquiterpene synthase activity|sesquiterpene biosynthetic process	ko00909	Sesquiterpenoid and triterpenoid biosynthesis
LOC115707468	390.514	543.685	237.343	0.434789	-1.20161	9.39e-05	0.00134239	Down	2.91143	1.52491	3.28149	3.10118	4.30125	8.0567	7.30856	5.35117	FRO2	At1g01580	GeneID:115707468	ferric reduction oxidase 2-like	GO:0016021,GO:0005886,GO:0000293,GO:0046872,GO:0006811,GO:0015688,GO:0055072,GO:0009617	integral component of membrane|plasma membrane|ferric-chelate reductase activity|metal ion binding|ion transport|iron chelate transport|iron ion homeostasis|response to bacterium
LOC115707530	821.124	419.045	1223.2	2.91147	1.54175	1.31e-05	0.000246818	Up	23.9925	24.8515	20.2597	19.7552	4.78328	12.8322	4.37894	8.73811	RGLG4	At1g79380	GeneID:115707530	E3 ubiquitin-protein ligase RGLG4-like	GO:0005737,GO:0005634,GO:0046872,GO:0004842,GO:0042742,GO:0009867,GO:0009611	cytoplasm|nucleus|metal ion binding|ubiquitin-protein transferase activity|defense response to bacterium|jasmonic acid mediated signaling pathway|response to wounding
LOC115707546	1272.45	2436.39	108.511	0.0631078	-3.98604	2.74e-05	0.000465555	Down	2.04105	1.17767	2.66567	1.76475	22.1138	5.07695	8.3895	136.109	WRKY46	At2g46400	GeneID:115707546	probable WRKY transcription factor 46	GO:0005730,GO:0005634,GO:0003700,GO:0000987,GO:0043565,GO:0044212,GO:0009742,GO:0042742,GO:0048527,GO:1900457,GO:2000022,GO:2000070,GO:0006355,GO:0009617,GO:0010200,GO:0009751	nucleolus|nucleus|DNA-binding transcription factor activity|proximal promoter sequence-specific DNA binding|sequence-specific DNA binding|transcription regulatory region DNA binding|brassinosteroid mediated signaling pathway|defense response to bacterium|lateral root development|regulation of brassinosteroid mediated signaling pathway|regulation of jasmonic acid mediated signaling pathway|regulat…
LOC115707560	41.3997	0.250731	82.5486	231.403	7.85427	3.34e-11	2e-09	Up	4.23797	6.71228	2.10037	1.0731	0	0	0.0440732	0			GeneID:115707560	non-specific lipid-transfer protein A-like	GO:0008289,GO:0006869	lipid binding|lipid transport
LOC115707561	514.956	973.516	56.3953	0.0591848	-4.07863	7.05e-08	2.45e-06	Down	0.192894	0.306486	0.302527	0.245602	7.42191	4.45244	0.191483	5.9048		At3g06530	GeneID:115707561	uncharacterized protein At3g06530-like	GO:0030686,GO:0032040,GO:0034455,GO:0030515,GO:0000462,GO:0045943	90S preribosome|small-subunit processome|t-UTP complex|snoRNA binding|maturation of SSU-rRNA from tricistronic rRNA transcript (SSU-rRNA, 5.8S rRNA, LSU-rRNA)|positive regulation of transcription by RNA polymerase I	ko03008	Ribosome biogenesis in eukaryotes
LOC115707572	64.9098	87.6023	42.2174	0.476257	-1.07019	0.000913451	0.00876482	Down	0.699037	0.49364	0.351469	0.442511	1.00271	1.32729	0.787551	1.02468	PCMP-H27	At4g35130	GeneID:115707572	pentatricopeptide repeat-containing protein At4g35130, chloroplastic-like
LOC115707628	123.465	195.211	51.7182	0.30341	-1.72066	0.00431729	0.0299868	Down	3.73747	0.640971	2.21473	1.25056	12.9888	11.0132	1.74907	3.5669	Cht4	Os04g0493400	GeneID:115707628	chitinase 4-like	GO:0008061,GO:0004568,GO:0016998,GO:0006032,GO:0006952,GO:0000272	chitin binding|chitinase activity|cell wall macromolecule catabolic process|chitin catabolic process|defense response|polysaccharide catabolic process	ko00520	Amino sugar and nucleotide sugar metabolism
LOC115707630	114.419	179.054	49.7843	0.279698	-1.83806	1.77e-06	4.27e-05	Down	0.395767	0.838439	0.979395	0.399286	1.98065	1.97732	2.66049	2.83106	IQD1	At3g09710	GeneID:115707630	protein IQ-DOMAIN 1-like	GO:0005737,GO:0005874,GO:0005634,GO:0005516,GO:0008017	cytoplasm|microtubule|nucleus|calmodulin binding|microtubule binding
LOC115707633	647.757	395.553	899.961	2.21225	1.14551	0.00207412	0.0169721	Up	10.2594	11.5339	6.04041	5.50984	4.02855	2.91491	2.19477	5.52897	B120	At4g21390	GeneID:115707633	G-type lectin S-receptor-like serine/threonine-protein kinase B120
LOC115707636	181.979	108.153	255.805	2.37586	1.24845	0.000622578	0.00645452	Up	3.21134	2.93829	2.94496	2.48199	1.91605	0.613566	0.990249	1.35211		At1g61480	GeneID:115707636	G-type lectin S-receptor-like serine/threonine-protein kinase At1g61480
LOC115707643	284.418	456.531	112.304	0.182578	-2.45341	4.3e-05	0.000681159	Down	0.96015	0.543593	0.730374	5.58026	8.27525	7.25451	7.59217	9.0425	UXS5	At3g46440	GeneID:115707643	UDP-glucuronic acid decarboxylase 6-like	GO:0005737,GO:0005829,GO:0070403,GO:0048040,GO:0042732,GO:0033320	cytoplasm|cytosol|NAD+ binding|UDP-glucuronate decarboxylase activity|D-xylose metabolic process|UDP-D-xylose biosynthetic process	ko00520	Amino sugar and nucleotide sugar metabolism
LOC115707646	1147.97	1597.64	698.303	0.455409	-1.13477	3.32e-05	0.000548048	Down	20.8469	16.127	15.5189	14.1363	23.3324	32.0225	40.9113	57.3549	SAUR36	At2g45210	GeneID:115707646	auxin-responsive protein SAUR36-like	GO:0005634,GO:0009734,GO:0007275,GO:1900057,GO:0040008,GO:0010029	nucleus|auxin-activated signaling pathway|multicellular organism development|positive regulation of leaf senescence|regulation of growth|regulation of seed germination	ko04075	Plant hormone signal transduction
LOC115707655	427.123	641.799	212.447	0.350992	-1.51049	1.78e-07	5.66e-06	Down	5.42952	6.52701	5.42808	5.34741	12.1906	11.3863	16.0767	29.4742	DER1	At4g29330	GeneID:115707655	derlin-1-like	GO:0005789,GO:0016021	endoplasmic reticulum membrane|integral component of membrane	ko04141	Protein processing in endoplasmic reticulum
LOC115707664	243.148	145.836	340.46	2.30325	1.20367	0.00124023	0.0112512	Up	6.09468	7.19504	5.56144	3.54887	2.83836	1.56969	1.65955	3.51944	RLCK176	Os05g0110900	GeneID:115707664	receptor-like cytoplasmic kinase 176	GO:0005524,GO:0004674,GO:0045087	ATP binding|protein serine/threonine kinase activity|innate immune response
LOC115707666	61.7027	117.844	5.56186	0.0493268	-4.34148	1.15e-09	5.44e-08	Down	0.0227936	0.0362165	0.167609	0.0432871	0.938652	0.668538	0.759136	3.34779	LECRK91	At5g10530	GeneID:115707666	L-type lectin-domain containing receptor kinase IX.1-like
LOC115707669	199.624	93.275	305.972	3.21921	1.68671	3.52e-06	7.86e-05	Up	14.7623	9.57251	27.1142	21.4259	4.75137	5.93962	3.61624	7.99594	EPFL3	At3g13898	GeneID:115707669	EPIDERMAL PATTERNING FACTOR-like protein 6	GO:0005576,GO:0010052,GO:0010374	extracellular region|guard cell differentiation|stomatal complex development
LOC115707691	147.965	203.725	92.2044	0.449876	-1.1524	3.9e-05	0.000631677	Down	1.77078	1.23593	1.35102	1.01668	2.85782	3.44194	3.85224	1.79361	NCS1	At5g03555	GeneID:115707691	purine-uracil permease NCS1	GO:0031969,GO:0016021,GO:0005886,GO:0009526,GO:0015205,GO:0043100	chloroplast membrane|integral component of membrane|plasma membrane|plastid envelope|nucleobase transmembrane transporter activity|pyrimidine nucleobase salvage
LOC115707710	392.193	243.748	540.639	2.27076	1.18317	4.72e-06	0.000101986	Up	14.1114	9.33035	13.0152	15.0423	7.42843	6.69395	4.85827	4.28268	PER29	At3g17070	GeneID:115707710	peroxidase 29-like	GO:0005576,GO:0009505,GO:0009506,GO:0020037,GO:0046872,GO:0004601,GO:0042744,GO:0006979	extracellular region|plant-type cell wall|plasmodesma|heme binding|metal ion binding|peroxidase activity|hydrogen peroxide catabolic process|response to oxidative stress	ko00940	Phenylpropanoid biosynthesis
LOC115707717	16.7683	6.23967	27.2969	4.24005	2.08408	0.00526739	0.0349876	Up	0.499808	1.33507	0.491671	0.185709	0.223721	0.149968	0.0711872	0.128094	GLIP1	At5g40990	GeneID:115707717	GDSL esterase/lipase 1-like	GO:0005615,GO:0005622,GO:0016298,GO:0042742,GO:0050832,GO:0009817,GO:0009866,GO:0009871,GO:0016042,GO:0009620,GO:0009751,GO:0009627	extracellular space|intracellular|lipase activity|defense response to bacterium|defense response to fungus|defense response to fungus, incompatible interaction|induced systemic resistance, ethylene mediated signaling pathway|jasmonic acid and ethylene-dependent systemic resistance, ethylene mediated signaling pathway|lipid catabolic process|response to fungus|response to salicylic acid|systemic a…
LOC115707721	87.2399	26.4029	148.077	5.5894	2.48269	1.72e-12	1.21e-10	Up	3.12589	2.84366	3.12022	2.46183	0.652041	0.338389	0.361412	0.704518	GLIP1	At5g40990	GeneID:115707721	GDSL esterase/lipase 1-like	GO:0005615,GO:0005622,GO:0016298,GO:0042742,GO:0050832,GO:0009817,GO:0009866,GO:0009871,GO:0016042,GO:0009620,GO:0009751,GO:0009627	extracellular space|intracellular|lipase activity|defense response to bacterium|defense response to fungus|defense response to fungus, incompatible interaction|induced systemic resistance, ethylene mediated signaling pathway|jasmonic acid and ethylene-dependent systemic resistance, ethylene mediated signaling pathway|lipid catabolic process|response to fungus|response to salicylic acid|systemic a…
LOC115707741	1315.47	1838.37	792.58	0.435517	-1.1992	1.89e-10	1e-08	Down	18.2445	18.1337	13.093	17.9727	41.533	45.5749	42.4335	27.9125			GeneID:115707741	uncharacterized protein LOC115707741
LOC115707751	140.852	189.525	92.1795	0.482777	-1.05057	2.86e-05	0.000482505	Down	2.33358	1.95256	1.81911	1.56412	4.71069	3.47351	3.08351	4.50812	RR10	Os12g0139400	GeneID:115707751	two-component response regulator ORR10-like isoform X1	GO:0005634,GO:0009736,GO:0000160	nucleus|cytokinin-activated signaling pathway|phosphorelay signal transduction system	ko04075	Plant hormone signal transduction
LOC115707754	8347.07	2642.49	14051.7	5.48637	2.45585	1.31e-07	4.25e-06	Up	495.001	444.665	334.786	369.083	17.3584	104.787	120.39	71.9117			GeneID:115707754	glutathione transferase GST 23-like	GO:0005737,GO:0004364,GO:0006952,GO:0006749	cytoplasm|glutathione transferase activity|defense response|glutathione metabolic process	ko00480	Glutathione metabolism
LOC115707758	251.294	346.863	155.725	0.455102	-1.13574	3.71e-05	0.000607512	Down	2.64971	3.18646	2.38042	2.07201	4.93876	4.30262	5.65059	8.14637	RLCK176	Os05g0110900	GeneID:115707758	receptor-like cytoplasmic kinase 176	GO:0005524,GO:0004674,GO:0045087	ATP binding|protein serine/threonine kinase activity|innate immune response
LOC115707766	152.073	202.224	101.922	0.498818	-1.00342	0.00070731	0.00712317	Down	1.67039	1.61367	1.57221	0.926287	2.91964	2.19794	2.7287	3.64968			GeneID:115707766	uncharacterized protein At5g41620-like
LOC115707772	686.565	1005.17	367.965	0.370212	-1.43358	1.51e-09	7.02e-08	Down	6.24253	6.35615	4.58029	7.93405	21.8285	16.8093	15.5002	14.7062			GeneID:115707772	cytochrome P450 CYP72A219-like	GO:0016021,GO:0020037,GO:0005506,GO:0004497,GO:0016705	integral component of membrane|heme binding|iron ion binding|monooxygenase activity|oxidoreductase activity, acting on paired donors, with incorporation or reduction of molecular oxygen
LOC115707790	352.269	581.385	123.154	0.212954	-2.23138	3.61e-38	1.36e-35	Down	1.70141	2.33803	2.08084	1.87755	7.60966	8.83277	10.8962	10.7219			GeneID:115707790	uncharacterized protein LOC115707790
LOC115707793	327.245	55.3007	599.189	10.8868	3.44451	6.7e-05	0.00100616	Up	10.9624	11.0265	13.1102	11.7039	0.0632265	2.90323	0.160948	1.26704		At1g67280	GeneID:115707793	probable lactoylglutathione lyase, chloroplastic	GO:0009507,GO:0009570,GO:0010319,GO:0009579,GO:0031977,GO:0004462,GO:0046872,GO:0019243,GO:0009409	chloroplast|chloroplast stroma|stromule|thylakoid|thylakoid lumen|lactoylglutathione lyase activity|metal ion binding|methylglyoxal catabolic process to D-lactate via S-lactoyl-glutathione|response to cold	ko00620	Pyruvate metabolism
LOC115707810	629.621	319.416	939.826	2.9421	1.55685	5.83e-08	2.05e-06	Up	17.8653	19.8603	29.1581	25.7772	8.64811	10.8094	5.28346	6.8789	DHAR2	At1g75270	GeneID:115707810	glutathione S-transferase DHAR2-like	GO:0005829,GO:0005886,GO:0043295,GO:0045174,GO:0004364,GO:0080151,GO:0010731	cytosol|plasma membrane|glutathione binding|glutathione dehydrogenase (ascorbate) activity|glutathione transferase activity|positive regulation of salicylic acid mediated signaling pathway|protein glutathionylation	ko00053,ko00480	Ascorbate and aldarate metabolism|Glutathione metabolism
LOC115707811	31.3798	14.0125	48.7472	3.4739	1.79656	0.00115821	0.0106224	Up	2.61663	2.02705	0.927804	2.4846	0.75946	0.31444	0.554392	0.690626			GeneID:115707811	uncharacterized protein LOC115707811
LOC115707812	1301.89	1791.07	812.717	0.461204	-1.11652	2.26e-07	6.94e-06	Down	10.6092	9.96733	8.51076	11.0028	31.1591	18.4045	19.0877	19.7131	INT4	At4g16480	GeneID:115707812	inositol transporter 4	GO:0005887,GO:0005886,GO:0005351,GO:0005355,GO:0008645	integral component of plasma membrane|plasma membrane|carbohydrate:proton symporter activity|glucose transmembrane transporter activity|hexose transmembrane transport
LOC115707835	83.5379	123.603	43.4731	0.359049	-1.47775	0.00190627	0.0158553	Down	1.0937	0.795054	0.921893	1.14033	0.932179	3.97123	4.00432	2.50713	2KGR	VIT_09s0002g04300	GeneID:115707835	hydroxyphenylpyruvate reductase-like	GO:0047995,GO:0051287,GO:0102742,GO:0055114	hydroxyphenylpyruvate reductase activity|NAD binding|R(+)-3,4-dihydroxyphenyllactate:NADP+ oxidoreductase activity|oxidation-reduction process
LOC115707905	279.351	398.625	160.077	0.38151	-1.39021	2.11e-05	0.000372073	Down	4.01439	3.41211	1.83121	1.73685	9.16563	4.85938	5.51479	7.79233	ZIF1	At5g13740	GeneID:115707905	protein ZINC INDUCED FACILITATOR 1-like	GO:0016021,GO:0009705,GO:0005886,GO:0022821,GO:0090333,GO:0009624,GO:0010043,GO:0055069	integral component of membrane|plant-type vacuole membrane|plasma membrane|potassium ion antiporter activity|regulation of stomatal closure|response to nematode|response to zinc ion|zinc ion homeostasis
LOC115707919	1754.31	2445.46	1063.16	0.439476	-1.18615	0.000445045	0.00495509	Down	16.9452	11.7372	15.4091	16.8216	14.8391	52.1761	42.1713	32.8702	NRAMP6	At1g15960	GeneID:115707919	metal transporter Nramp6-like	GO:0012505,GO:0016021,GO:0015086,GO:0005384,GO:0070574,GO:0055072	endomembrane system|integral component of membrane|cadmium ion transmembrane transporter activity|manganese ion transmembrane transporter activity|cadmium ion transmembrane transport|iron ion homeostasis
LOC115707958	730.722	1037.18	424.262	0.406695	-1.29798	0.0019221	0.0159594	Down	7.48871	4.35928	10.1128	8.40811	8.06471	28.9056	25.4714	12.8419	HST		GeneID:115707958	shikimate O-hydroxycinnamoyltransferase-like	GO:0047172	shikimate O-hydroxycinnamoyltransferase activity	ko00940,ko00941,ko00945	Phenylpropanoid biosynthesis|Flavonoid biosynthesis|Stilbenoid, diarylheptanoid and gingerol biosynthesis
LOC115707966	4296.47	6166.13	2426.8	0.389529	-1.3602	5.5e-05	0.000849605	Down	37.3721	34.6126	20.0573	25.753	54.2007	58.6618	130.856	58.9048	HSP70		GeneID:115707966	heat shock 70 kDa protein-like	GO:0005737,GO:0005524,GO:0016887,GO:0042623,GO:0031072,GO:0051787,GO:0044183,GO:0051082,GO:0034605,GO:0034620,GO:0051085,GO:0042026,GO:0006986	cytoplasm|ATP binding|ATPase activity|ATPase activity, coupled|heat shock protein binding|misfolded protein binding|protein binding involved in protein folding|unfolded protein binding|cellular response to heat|cellular response to unfolded protein|chaperone cofactor-dependent protein refolding|protein refolding|response to unfolded protein	ko03040,ko04141,ko04144	Spliceosome|Protein processing in endoplasmic reticulum|Endocytosis
LOC115707967	3526.57	5279.94	1773.2	0.338213	-1.564	0.000718226	0.00720665	Down	27.2253	26.0892	14.9276	17.6977	22.4712	64.0099	127.843	45.934	HSP70		GeneID:115707967	heat shock 70 kDa protein	GO:0005737,GO:0005524,GO:0016887,GO:0042623,GO:0031072,GO:0051787,GO:0044183,GO:0051082,GO:0034605,GO:0034620,GO:0051085,GO:0042026,GO:0006986	cytoplasm|ATP binding|ATPase activity|ATPase activity, coupled|heat shock protein binding|misfolded protein binding|protein binding involved in protein folding|unfolded protein binding|cellular response to heat|cellular response to unfolded protein|chaperone cofactor-dependent protein refolding|protein refolding|response to unfolded protein	ko03040,ko04141,ko04144	Spliceosome|Protein processing in endoplasmic reticulum|Endocytosis
LOC115707969	581.065	171.854	990.276	5.78424	2.53213	8.96e-23	1.52e-20	Up	12.7968	16.6279	11.8769	11.3879	1.4509	2.54221	3.08543	2.17141		At5g56900	GeneID:115707969	LOW QUALITY PROTEIN: zinc finger CCCH domain-containing protein 64-like	GO:0005829,GO:0003677,GO:0046872	cytosol|DNA binding|metal ion binding
LOC115707983	414.211	692.076	136.347	0.19715	-2.34264	2.29e-49	1.29e-46	Down	1.28498	1.0298	1.32934	1.24422	5.73449	7.17597	6.42491	5.63099	MKP1	At3g55270	GeneID:115707983	protein-tyrosine-phosphatase MKP1-like	GO:0005829,GO:0017017,GO:0004725,GO:0006952,GO:1902065,GO:0009651,GO:0010224,GO:0010225	cytosol|MAP kinase tyrosine/serine/threonine phosphatase activity|protein tyrosine phosphatase activity|defense response|response to L-glutamate|response to salt stress|response to UV-B|response to UV-C
LOC115707984	139.399	228.866	49.932	0.167347	-2.57908	5.57e-07	1.54e-05	Down	0.168119	0.415523	0.278945	1.48994	2.0385	2.78453	3.59815	2.55456			GeneID:115707984	LOW QUALITY PROTEIN: uncharacterized protein LOC115707984
LOC115707986	740.925	1476.78	5.06634	0.00345677	-8.17636	5.46e-105	2.62e-101	Down	0.0746057	0.0395133	0.0703332	0.0826483	17.2959	23.026	21.9009	16.2104	HEXO1	At3g55260	GeneID:115707986	beta-hexosaminidase 1-like	GO:0005829,GO:0009505,GO:0005773,GO:0004563,GO:0015929,GO:0102148,GO:0005975	cytosol|plant-type cell wall|vacuole|beta-N-acetylhexosaminidase activity|hexosaminidase activity|N-acetyl-beta-D-galactosaminidase activity|carbohydrate metabolic process	ko00511,ko00513,ko00520,ko00531,ko00603,ko00604	Other glycan degradation|Various types of N-glycan biosynthesis|Amino sugar and nucleotide sugar metabolism|Glycosaminoglycan degradation|Glycosphingolipid biosynthesis - globo and isoglobo series|Glycosphingolipid biosynthesis - ganglio series
LOC115708005	64.7513	129.503	0	0.00170338	-9.19739	0.00657346	0.0413015	Down	0	0	0	0	0	0.277142	2.92882	0.361308	RPPL1	At3g14470	GeneID:115708005	putative disease resistance RPP13-like protein 1
LOC115708006	65.5244	131.049	0	0.00155573	-9.32819	0.00316509	0.0234168	Down	0	0	0	0	0	1.16417	2.01251	1.10568	RPPL1	At3g14470	GeneID:115708006	putative disease resistance RPP13-like protein 1
LOC115708030	563.413	306.144	820.681	2.66453	1.41388	1.07e-07	3.54e-06	Up	10.25	11.914	14.6049	13.5079	2.96018	7.10031	4.34126	4.55916	PME54	At5g20860	GeneID:115708030	pectinesterase-like	GO:0005618,GO:0005576,GO:0045330,GO:0030599,GO:0046910,GO:0042545,GO:0045490	cell wall|extracellular region|aspartyl esterase activity|pectinesterase activity|pectinesterase inhibitor activity|cell wall modification|pectin catabolic process	ko00040	Pentose and glucuronate interconversions
LOC115708036	227.934	0.250731	455.616	1460.61	10.5124	4.64e-24	8.83e-22	Up	7.83212	6.79708	6.06232	5.85822	0	0	0.0150041	0			GeneID:115708036	peptide-N4-(N-acetyl-beta-glucosaminyl)asparagine amidase A-like	GO:0000224	peptide-N4-(N-acetyl-beta-glucosaminyl)asparagine amidase activity
LOC115708062	8.96032	17.2023	0.718341	0.0392087	-4.67268	2.94e-05	0.000494825	Down	0	0	0.0235147	0.0394743	0.0951083	0.239079	0.590132	0.612624		GSVIVT00023967001	GeneID:115708062	peroxidase 4-like	GO:0005576,GO:0020037,GO:0046872,GO:0004601,GO:0042744,GO:0006979	extracellular region|heme binding|metal ion binding|peroxidase activity|hydrogen peroxide catabolic process|response to oxidative stress	ko00940	Phenylpropanoid biosynthesis
LOC115708077	378.36	528.774	227.945	0.43308	-1.20729	0.000696004	0.00704998	Down	3.14609	3.83239	2.78257	4.03292	3.76239	11.5302	10.681	6.53287	EGY2	At5g05740	GeneID:115708077	probable zinc metalloprotease EGY2, chloroplastic	GO:0009507,GO:0031969,GO:0009535,GO:0016021,GO:0008237	chloroplast|chloroplast membrane|chloroplast thylakoid membrane|integral component of membrane|metallopeptidase activity
LOC115708087	867.094	1204.12	530.071	0.4446	-1.16942	0.00657641	0.0413015	Down	16.9949	13.0751	11.3332	15.9918	20.5221	23.163	69.2913	19.2321	HSA32	At4g21320	GeneID:115708087	protein HEAT-STRESS-ASSOCIATED 32	GO:0003824,GO:0010286,GO:0010608,GO:0009408	catalytic activity|heat acclimation|posttranscriptional regulation of gene expression|response to heat
LOC115708096	158.332	223.552	93.1129	0.415427	-1.26733	4.28e-06	9.38e-05	Down	2.08813	2.08327	3.51592	1.91361	4.83278	6.61881	6.46927	5.27175	GOS12	At2g45200	GeneID:115708096	LOW QUALITY PROTEIN: Golgi SNAP receptor complex member 1-2-like	GO:0005801,GO:0005829,GO:0005789,GO:0005768,GO:0005794,GO:0005797,GO:0000139,GO:0016021,GO:0031201,GO:0005802,GO:0005773,GO:0005484,GO:0006888,GO:0015031,GO:0048209,GO:0009737,GO:0006906	cis-Golgi network|cytosol|endoplasmic reticulum membrane|endosome|Golgi apparatus|Golgi medial cisterna|Golgi membrane|integral component of membrane|SNARE complex|trans-Golgi network|vacuole|SNAP receptor activity|ER to Golgi vesicle-mediated transport|protein transport|regulation of vesicle targeting, to, from or within Golgi|response to abscisic acid|vesicle fusion	ko04130	SNARE interactions in vesicular transport
LOC115708100	200.18	95.9764	304.384	3.17439	1.66648	1.43e-11	8.98e-10	Up	3.9994	2.72593	3.88169	3.77645	1.23612	0.909769	1.41112	0.995967	LAMP1	At5g19740	GeneID:115708100	probable glutamate carboxypeptidase LAMP1 isoform X1	GO:0005783,GO:0005789,GO:0016021,GO:0005773,GO:0046872,GO:0008237,GO:0010073,GO:0007275,GO:0040008	endoplasmic reticulum|endoplasmic reticulum membrane|integral component of membrane|vacuole|metal ion binding|metallopeptidase activity|meristem maintenance|multicellular organism development|regulation of growth
LOC115708134	780.033	456.473	1103.59	2.41866	1.27421	8.09e-12	5.27e-10	Up	18.055	20.3932	15.8091	19.373	8.23603	6.26991	6.98466	9.08561	AVT6C	At3g56200	GeneID:115708134	amino acid transporter AVT6C-like	GO:0016021,GO:0015171,GO:0003333	integral component of membrane|amino acid transmembrane transporter activity|amino acid transmembrane transport
LOC115708136	1085.42	1456.28	714.567	0.473671	-1.07804	0.000323029	0.00384372	Down	16.9089	13.0444	22.4193	29.8658	33.5844	53.5931	52.6902	29.5649	PRXQ		GeneID:115708136	peroxiredoxin Q, chloroplastic	GO:0009543,GO:0004601,GO:0051920,GO:0045454	chloroplast thylakoid lumen|peroxidase activity|peroxiredoxin activity|cell redox homeostasis
LOC115708144	537.683	839.143	236.222	0.281402	-1.8293	5.29e-14	4.47e-12	Down	8.31514	8.55622	7.64058	9.44249	33.2327	19.9479	38.654	29.3753			GeneID:115708144	uncharacterized protein LOC115708144
LOC115708159	201.756	28.4237	375.088	14.236	3.83147	5.98e-34	1.95e-31	Up	6.6035	6.23234	6.85082	5.21536	0.823395	0.467959	0.324655	0.261345	PAT12	At4g00840	GeneID:115708159	probable protein S-acyltransferase 12	GO:0005783,GO:0005794,GO:0016021,GO:0005886,GO:0019706,GO:0018230,GO:0006612	endoplasmic reticulum|Golgi apparatus|integral component of membrane|plasma membrane|protein-cysteine S-palmitoyltransferase activity|peptidyl-L-cysteine S-palmitoylation|protein targeting to membrane
LOC115708163	441.855	688.269	195.442	0.283505	-1.81855	3.17e-06	7.17e-05	Down	2.35792	1.12085	1.61179	1.81964	3.41204	9.21912	8.05177	3.9536	RFS2	At3g57520	GeneID:115708163	probable galactinol--sucrose galactosyltransferase 2 isoform X1	GO:0009506,GO:0052692,GO:0016757,GO:0034484,GO:0010325,GO:0080167,GO:0006979	plasmodesma|raffinose alpha-galactosidase activity|transferase activity, transferring glycosyl groups|raffinose catabolic process|raffinose family oligosaccharide biosynthetic process|response to karrikin|response to oxidative stress
LOC115708179	393.91	249.048	538.771	2.18667	1.12874	5.93e-06	0.00012524	Up	7.10523	9.23243	7.54413	10.4346	4.9937	3.91306	4.14231	2.88386			GeneID:115708179	uncharacterized protein LOC115708179
LOC115708198	179.574	118.572	240.576	2.01161	1.00835	3.51e-08	1.28e-06	Up	3.99823	3.28093	2.56868	2.74191	1.52453	1.76002	1.52267	1.43056	GIL1	At5g58960	GeneID:115708198	protein GRAVITROPIC IN THE LIGHT 1	GO:0009959,GO:0009639	negative gravitropism|response to red or far red light
LOC115708200	144.703	228.231	61.1736	0.267284	-1.90355	9.37e-18	1.16e-15	Down	0.909726	1.36836	1.29673	1.14025	4.10011	4.58308	3.97353	5.04072	ALG5	YPL227C	GeneID:115708200	LOW QUALITY PROTEIN: dolichyl-phosphate beta-glucosyltransferase-like	GO:0005789,GO:0016021,GO:0004581,GO:0006487	endoplasmic reticulum membrane|integral component of membrane|dolichyl-phosphate beta-glucosyltransferase activity|protein N-linked glycosylation	ko00510	N-Glycan biosynthesis
LOC115708209	183.405	20.4996	346.31	16.8399	4.07381	3.37e-21	5.14e-19	Up	7.1125	13.1026	12.39	5.26098	0.530609	0.474248	0.872331	0.379759	DER1	At4g29330	GeneID:115708209	derlin-1-like	GO:0005789,GO:0016021	endoplasmic reticulum membrane|integral component of membrane	ko04141	Protein processing in endoplasmic reticulum
LOC115708213	876.136	1737.52	14.749	0.00902707	-6.79153	1.46e-08	5.85e-07	Down	0.671188	0.311045	1.09149	0.557657	0.527844	130.564	115.479	68.8246	RPS27B	At3g61110	GeneID:115708213	hypothetical protein B456_004G062400	GO:0005618,GO:0022626,GO:0022627,GO:0009506,GO:0042788,GO:0005840,GO:0046872,GO:0003735,GO:0000028,GO:0006412	cell wall|cytosolic ribosome|cytosolic small ribosomal subunit|plasmodesma|polysomal ribosome|ribosome|metal ion binding|structural constituent of ribosome|ribosomal small subunit assembly|translation	ko03010	Ribosome
LOC115708215	298.801	441.697	155.905	0.352718	-1.50341	7.95e-14	6.58e-12	Down	2.32541	2.39525	3.24753	2.63446	7.42975	9.14923	6.58453	7.02698			GeneID:115708215	WD repeat-containing protein WRAP73-like isoform X1	GO:0005829,GO:0072686,GO:0044732,GO:1990811,GO:0005634,GO:1990810,GO:0000070,GO:1902440	cytosol|mitotic spindle|mitotic spindle pole body|MWP complex|nucleus|microtubule anchoring at mitotic spindle pole body|mitotic sister chromatid segregation|protein localization to mitotic spindle pole body
LOC115708217	375.354	503.617	247.091	0.484871	-1.04433	5.42e-05	0.000839561	Down	4.6184	2.71357	5.69411	5.87572	8.21341	10.1469	11.4849	8.9682			GeneID:115708217	uncharacterized protein LOC115708217
LOC115708220	54.6172	105.526	3.7087	0.0345691	-4.85437	6.05e-15	5.52e-13	Down	0.0333275	0.211814	0.150811	0.126584	4.23169	1.87832	3.712	5.10775	SWEET14		GeneID:115708220	bidirectional sugar transporter SWEET14-like	GO:0005887,GO:0008515,GO:0051119	integral component of plasma membrane|sucrose transmembrane transporter activity|sugar transmembrane transporter activity
LOC115708221	146.775	26.1534	267.397	10.2293	3.35463	3.63e-05	0.000597634	Up	3.86909	5.24144	1.75676	4.01126	0.210755	0.847659	0.0143703	0.400798	SYT3	At5g04220	GeneID:115708221	synaptotagmin-3	GO:0005783,GO:0016021,GO:0008289,GO:0046872,GO:0006869	endoplasmic reticulum|integral component of membrane|lipid binding|metal ion binding|lipid transport
LOC115708224	69.1876	93.3237	45.0514	0.487669	-1.03603	0.00501386	0.0335665	Down	0.947981	1.20955	0.804323	1.14565	2.04557	1.18949	2.70552	2.62465	PYL4	At2g38310	GeneID:115708224	abscisic acid receptor PYL4-like	GO:0005737,GO:0005634,GO:0005886,GO:0010427,GO:0042803,GO:0004864,GO:0038023,GO:0009738,GO:0080163	cytoplasm|nucleus|plasma membrane|abscisic acid binding|protein homodimerization activity|protein phosphatase inhibitor activity|signaling receptor activity|abscisic acid-activated signaling pathway|regulation of protein serine/threonine phosphatase activity	ko04016,ko04075	MAPK signaling pathway - plant|Plant hormone signal transduction
LOC115708225	137.607	21.3814	253.833	12.0747	3.59391	2e-17	2.35e-15	Up	7.51891	10.3243	10.7112	14.1657	0.227537	1.05243	1.60731	0.781674	SRP14	At2g43640	GeneID:115708225	signal recognition particle 14 kDa protein-like	GO:0005786,GO:0008312,GO:0030942,GO:0045047,GO:0006614	signal recognition particle, endoplasmic reticulum targeting|7S RNA binding|endoplasmic reticulum signal peptide binding|protein targeting to ER|SRP-dependent cotranslational protein targeting to membrane	ko03060	Protein export
LOC115708244	152.822	211.346	94.2973	0.43564	-1.19879	0.00764003	0.0461557	Down	1.45599	2.96457	1.22619	0.814153	3.49756	2.95859	3.02076	5.07001	AOS3	Solyc10g007960	GeneID:115708244	allene oxide synthase 3-like	GO:0046423,GO:0020037,GO:0047987,GO:0005506,GO:0016705,GO:0006952,GO:0055114,GO:0031408,GO:0016125	allene-oxide cyclase activity|heme binding|hydroperoxide dehydratase activity|iron ion binding|oxidoreductase activity, acting on paired donors, with incorporation or reduction of molecular oxygen|defense response|oxidation-reduction process|oxylipin biosynthetic process|sterol metabolic process	ko00592	alpha-Linolenic acid metabolism
LOC115708250	60.4309	24.1671	96.6947	3.76713	1.91347	1.68e-05	0.000305996	Up	0.514778	1.72427	1.35359	2.08733	0.3183	0.336055	0.425385	0.355381	WSD1	At5g37300	GeneID:115708250	O-acyltransferase WSD1-like	GO:0005783,GO:0005789,GO:0016021,GO:0005886,GO:0102966,GO:0004144,GO:0047196,GO:0103095,GO:0019432,GO:0010025	endoplasmic reticulum|endoplasmic reticulum membrane|integral component of membrane|plasma membrane|arachidoyl-CoA:1-dodecanol O-acyltransferase activity|diacylglycerol O-acyltransferase activity|long-chain-alcohol O-fatty-acyltransferase activity|wax ester synthase activity|triglyceride biosynthetic process|wax biosynthetic process
LOC115708251	32.9299	18.5267	47.3331	2.44007	1.28692	0.00233651	0.0186193	Up	0.461442	0.518409	0.648569	1.16842	0.191943	0.273416	0.396992	0.247274	WSD1	At5g37300	GeneID:115708251	O-acyltransferase WSD1-like	GO:0005783,GO:0005789,GO:0016021,GO:0005886,GO:0102966,GO:0004144,GO:0047196,GO:0103095,GO:0019432,GO:0010025	endoplasmic reticulum|endoplasmic reticulum membrane|integral component of membrane|plasma membrane|arachidoyl-CoA:1-dodecanol O-acyltransferase activity|diacylglycerol O-acyltransferase activity|long-chain-alcohol O-fatty-acyltransferase activity|wax ester synthase activity|triglyceride biosynthetic process|wax biosynthetic process
LOC115708260	588.781	1096.26	81.3001	0.0745297	-3.74604	0.000896442	0.00862966	Down	3.12314	3.71056	4.9655	2.76519	4.10363	132.33	3.96337	59.0437	RPS27B	At3g61110	GeneID:115708260	40S ribosomal protein S27-2-like	GO:0005618,GO:0022626,GO:0022627,GO:0009506,GO:0042788,GO:0005840,GO:0046872,GO:0003735,GO:0000028,GO:0006412	cell wall|cytosolic ribosome|cytosolic small ribosomal subunit|plasmodesma|polysomal ribosome|ribosome|metal ion binding|structural constituent of ribosome|ribosomal small subunit assembly|translation	ko03010	Ribosome
LOC115708264	121.197	203.957	38.4365	0.178707	-2.48433	2.03e-05	0.000359895	Down	0.699382	1.65596	0.721385	0.273451	6.25902	1.82179	6.13203	3.57694	COMT1		GeneID:115708264	caffeic acid 3-O-methyltransferase-like	GO:0047763,GO:0046983,GO:0009809	caffeate O-methyltransferase activity|protein dimerization activity|lignin biosynthetic process	ko00940	Phenylpropanoid biosynthesis
LOC115708266	781.919	1173.38	390.456	0.324816	-1.62231	3.42e-12	2.32e-10	Down	12.5867	9.73875	5.92308	6.44314	31.6467	31.0742	16.9687	24.6695	CXE8	At2g45600	GeneID:115708266	probable carboxylesterase 8	GO:0052689	carboxylic ester hydrolase activity
LOC115708277	59.2732	28.4016	90.1448	3.05544	1.61138	0.0064925	0.040962	Up	1.74779	2.48516	0.944087	0.837278	0.198129	0.760655	0.309489	0.649708	MTP10	At1g16310	GeneID:115708277	metal tolerance protein 9-like	GO:0016021,GO:0005774,GO:0008324	integral component of membrane|vacuolar membrane|cation transmembrane transporter activity
LOC115708279	8.04864	16.0973	0	0.0116871	-6.41894	0.00378664	0.0270042	Down	0	0	0	0	0	1.06996	0.859513	0.562402	DYN2	DEHA2A01672g	GeneID:115708279	dynein light chain, cytoplasmic-like	GO:0005868,GO:0005881,GO:0005643,GO:1990429,GO:0005777,GO:0008574,GO:0040001,GO:0030473,GO:0051292,GO:2000582	cytoplasmic dynein complex|cytoplasmic microtubule|nuclear pore|peroxisomal importomer complex|peroxisome|ATP-dependent microtubule motor activity, plus-end-directed|establishment of mitotic spindle localization|nuclear migration along microtubule|nuclear pore complex assembly|positive regulation of ATP-dependent microtubule motor activity, plus-end-directed
LOC115708284	25.3682	9.83748	40.8989	4.1303	2.04625	0.00626475	0.0399318	Up	0.415682	0.466215	0.442591	0.789417	0.223765	0.0140622	0.173553	0.0960894	NTL9	At4g35580	GeneID:115708284	uncharacterized protein LOC115708284	GO:0005789,GO:0016021,GO:0005634,GO:0005886,GO:0005516,GO:0003700,GO:0044212,GO:0071470,GO:0045892,GO:1900426,GO:0031347,GO:0006355	endoplasmic reticulum membrane|integral component of membrane|nucleus|plasma membrane|calmodulin binding|DNA-binding transcription factor activity|transcription regulatory region DNA binding|cellular response to osmotic stress|negative regulation of transcription, DNA-templated|positive regulation of defense response to bacterium|regulation of defense response|regulation of transcription, DNA-tem…
LOC115708288	44.842	82.9842	6.69984	0.0790554	-3.66099	1.15e-05	0.000220075	Down	0.123003	0.0558395	0.119272	0.200223	1.86935	0.363801	3.41542	0.569686	45202	At1g16390	GeneID:115708288	organic cation/carnitine transporter 3-like	GO:0016021,GO:0009705,GO:0005524,GO:0022857,GO:0070417,GO:0006811	integral component of membrane|plant-type vacuole membrane|ATP binding|transmembrane transporter activity|cellular response to cold|ion transport
LOC115708290	31.0159	46.9673	15.0644	0.319242	-1.64728	0.00156733	0.0136325	Down	0.657592	0.309582	0.495946	0.867239	1.71339	2.43716	1.07709	2.08168			GeneID:115708290	uncharacterized protein LOC115705798
LOC115708295	112.774	13.4678	212.08	15.7062	3.97326	1.64e-07	5.24e-06	Up	8.66125	4.02621	5.56881	9.733	0.534583	0.537526	0	0.70399			GeneID:115708295	uncharacterized protein LOC115708295
LOC115708296	258.471	347.184	169.758	0.487983	-1.0351	0.000205052	0.00263589	Down	4.25105	2.83993	4.7818	5.5044	10.9689	7.83439	9.25757	7.56968	LSM1B	At3g14080	GeneID:115708296	sm-like protein LSM1B	GO:1990726,GO:0005845,GO:0000932,GO:0003723,GO:0000339,GO:0009631,GO:0000290,GO:0042538,GO:0006397,GO:0009414,GO:0016070	Lsm1-7-Pat1 complex|mRNA cap binding complex|P-body|RNA binding|RNA cap binding|cold acclimation|deadenylation-dependent decapping of nuclear-transcribed mRNA|hyperosmotic salinity response|mRNA processing|response to water deprivation|RNA metabolic process	ko03018	RNA degradation
LOC115708299	173.107	1.59033	344.625	224.455	7.81028	1.08e-33	3.46e-31	Up	7.3375	6.87054	8.2549	7.15975	0.0463723	0.0466275	0.0442665	0	AIM1	At4g29010	GeneID:115708299	peroxisomal fatty acid beta-oxidation multifunctional protein AIM1-like	GO:0005618,GO:0009507,GO:0005777,GO:0009506,GO:0018812,GO:0003857,GO:0008692,GO:0004165,GO:0004300,GO:0008017,GO:0003729,GO:0006635,GO:0009908,GO:0009695	cell wall|chloroplast|peroxisome|plasmodesma|3-hydroxyacyl-CoA dehydratase activity|3-hydroxyacyl-CoA dehydrogenase activity|3-hydroxybutyryl-CoA epimerase activity|dodecenoyl-CoA delta-isomerase activity|enoyl-CoA hydratase activity|microtubule binding|mRNA binding|fatty acid beta-oxidation|flower development|jasmonic acid biosynthetic process	ko00071,ko00592	Fatty acid degradation|alpha-Linolenic acid metabolism
LOC115708301	4.27033	0	8.54067	44.7864	5.48499	0.0032365	0.023815	Up	0.544882	0.44891	1.09585	0.114976	0	0	0	0	AIM1	At4g29010	GeneID:115708301	peroxisomal fatty acid beta-oxidation multifunctional protein AIM1-like	GO:0005618,GO:0009507,GO:0005777,GO:0009506,GO:0018812,GO:0003857,GO:0008692,GO:0004165,GO:0004300,GO:0008017,GO:0003729,GO:0006635,GO:0009908,GO:0009695	cell wall|chloroplast|peroxisome|plasmodesma|3-hydroxyacyl-CoA dehydratase activity|3-hydroxyacyl-CoA dehydrogenase activity|3-hydroxybutyryl-CoA epimerase activity|dodecenoyl-CoA delta-isomerase activity|enoyl-CoA hydratase activity|microtubule binding|mRNA binding|fatty acid beta-oxidation|flower development|jasmonic acid biosynthetic process	ko00071,ko00592	Fatty acid degradation|alpha-Linolenic acid metabolism
LOC115708313	639.69	135.133	1144.25	8.38764	3.06826	2.28e-09	1.03e-07	Up	21.9938	38.0294	35.1965	11.5165	2.9909	5.15547	0.935701	3.56167	MIOX2	At2g19800	GeneID:115708313	inositol oxygenase 4-like	GO:0005737,GO:0050113,GO:0005506,GO:0019310,GO:0019853	cytoplasm|inositol oxygenase activity|iron ion binding|inositol catabolic process|L-ascorbic acid biosynthetic process	ko00053,ko00562	Ascorbate and aldarate metabolism|Inositol phosphate metabolism
LOC115708334	121.75	230.154	13.3468	0.0581704	-4.10357	4.88e-25	9.66e-23	Down	0.775857	0.428782	0.190807	0.512494	11.306	6.32432	8.80355	6.4955			GeneID:115708334	uncharacterized protein LOC115708334
LOC115708339	169.026	270.872	67.1798	0.258264	-1.95308	1.56e-06	3.82e-05	Down	2.99767	4.71334	3.8151	1.82349	21.3779	15.3001	5.83062	11.0898	SRP14	At2g43640	GeneID:115708339	signal recognition particle 14 kDa protein-like	GO:0005786,GO:0008312,GO:0030942,GO:0045047,GO:0006614	signal recognition particle, endoplasmic reticulum targeting|7S RNA binding|endoplasmic reticulum signal peptide binding|protein targeting to ER|SRP-dependent cotranslational protein targeting to membrane	ko03060	Protein export
LOC115708340	122.952	169.592	76.3131	0.448522	-1.15675	0.000492701	0.00536318	Down	1.34532	1.38545	1.47965	1.82744	4.27475	2.02019	4.01943	3.139	LYK3	At1g51940	GeneID:115708340	receptor-like serine/threonine-protein kinase At2g45590	GO:0016021,GO:0005886,GO:0005524,GO:0004674,GO:0009738,GO:0006952,GO:0050832,GO:0045087,GO:0031348,GO:0009789,GO:0009737	integral component of membrane|plasma membrane|ATP binding|protein serine/threonine kinase activity|abscisic acid-activated signaling pathway|defense response|defense response to fungus|innate immune response|negative regulation of defense response|positive regulation of abscisic acid-activated signaling pathway|response to abscisic acid
LOC115708655	98.9827	167.686	30.2791	0.161792	-2.62778	6.59e-06	0.000137037	Down	1.1373	0.382442	0.551401	0.257123	1.34226	6.12532	3.68623	1.87994	SIGD	At5g13730	GeneID:115708655	RNA polymerase sigma factor sigD, chloroplastic	GO:0009507,GO:0003677,GO:0003700,GO:0016987,GO:0071482,GO:0006352,GO:2001141	chloroplast|DNA binding|DNA-binding transcription factor activity|sigma factor activity|cellular response to light stimulus|DNA-templated transcription, initiation|regulation of RNA biosynthetic process
LOC115708660	16.3998	30.3923	2.40724	0.078248	-3.6758	0.000260994	0.0032234	Down	0.0918161	0.0972568	0.10387	0.174367	0.157543	3.32661	1.00259	1.53345		At2g22425	GeneID:115708660	probable signal peptidase complex subunit 1	GO:0030176,GO:0031090,GO:0005787,GO:0008233,GO:0045047,GO:0006465	integral component of endoplasmic reticulum membrane|organelle membrane|signal peptidase complex|peptidase activity|protein targeting to ER|signal peptide processing	ko03060	Protein export
LOC115708666	15.2742	28.6073	1.94111	0.0374299	-4.73967	0.00554685	0.0363574	Down	0.0319268	0.0338187	0	0	0	0.68854	0.18303	0.117622	KIN14L	At3g10310	GeneID:115708666	LOW QUALITY PROTEIN: kinesin-like protein KIN-14L	GO:0005871,GO:0005874,GO:0005524,GO:0016887,GO:0008017,GO:0003777,GO:0007018	kinesin complex|microtubule|ATP binding|ATPase activity|microtubule binding|microtubule motor activity|microtubule-based movement
LOC115708680	295.76	397.301	194.22	0.485384	-1.0428	0.000353373	0.00413561	Down	2.62674	3.34217	2.84849	3.95531	5.40497	8.95655	4.26001	7.72653	NFD4	At1g31470	GeneID:115708680	protein NUCLEAR FUSION DEFECTIVE 4-like	GO:0016021,GO:0005739,GO:0000741,GO:0010197,GO:0009651	integral component of membrane|mitochondrion|karyogamy|polar nucleus fusion|response to salt stress
LOC115708699	50.9874	100.562	1.41254	0.0142252	-6.13541	5.4e-07	1.51e-05	Down	0.0433596	0	0.0245259	0.0617578	0.0495991	3.91496	4.11918	1.36313	PYM	At2g42260	GeneID:115708699	protein POLYCHOME-like	GO:0005634,GO:0051301,GO:0006952,GO:0042023,GO:0009960,GO:0009561,GO:1904667,GO:1900426,GO:0051783,GO:0010224,GO:0010091	nucleus|cell division|defense response|DNA endoreduplication|endosperm development|megagametogenesis|negative regulation of ubiquitin protein ligase activity|positive regulation of defense response to bacterium|regulation of nuclear division|response to UV-B|trichome branching
LOC115708718	200.438	270.756	130.12	0.475418	-1.07273	0.000109427	0.00153733	Down	1.26201	1.55118	1.87215	1.87663	2.32885	4.95721	3.12014	3.39201			GeneID:115708718	uncharacterized protein LOC115708718
LOC115708724	224.873	340.176	109.569	0.321475	-1.63722	2.73e-16	2.88e-14	Down	0.961073	0.898723	0.866395	0.762861	2.24169	3.29036	2.45965	2.91371	RGA4		GeneID:115708724	putative disease resistance protein RGA4 isoform X1	GO:0043531,GO:0005524,GO:0006952	ADP binding|ATP binding|defense response
LOC115708725	29.2708	51.4482	7.09332	0.130151	-2.94175	1.96e-05	0.000348819	Down	0.135261	0.0835776	0.0892603	0.032109	0.232087	1.08904	0.529255	0.642276			GeneID:115708725	uncharacterized protein LOC115708725
LOC115708743	120.757	191.795	49.7184	0.259892	-1.94401	0.000248131	0.00308637	Down	0.777749	0.167155	0.663076	0.770616	2.41113	3.17635	1.21852	2.39192	TRZ4	At3g16260	GeneID:115708743	tRNAse Z TRZ4, mitochondrial-like	GO:0005739,GO:0042781,GO:0046872,GO:0072684,GO:0042780	mitochondrion|3'-tRNA processing endoribonuclease activity|metal ion binding|mitochondrial tRNA 3'-trailer cleavage, endonucleolytic|tRNA 3'-end processing	ko03013	RNA transport
LOC115708752	169.314	94.7995	243.829	2.59288	1.37455	6e-06	0.000126454	Up	3.9712	4.98482	5.97686	3.17282	2.30135	1.34817	1.92941	1.46089	ZOX1		GeneID:115708752	zeatin O-glucosyltransferase-like	GO:0016758,GO:0050404,GO:0009690,GO:0006486	transferase activity, transferring hexosyl groups|zeatin O-beta-D-xylosyltransferase activity|cytokinin metabolic process|protein glycosylation	ko00908	Zeatin biosynthesis
LOC115708755	226.792	453.584	0	0.00040458	-11.2713	0.000864733	0.00838748	Down	0	0	0	0	0	24.3956	13.454	10.6006	MOS4	At3g18165	GeneID:115708755	pre-mRNA-splicing factor SPF27 homolog	GO:0005730,GO:0005634,GO:0000974,GO:0005681,GO:0009870,GO:0010204,GO:0042742,GO:0050832,GO:0045087,GO:0006397,GO:0008380	nucleolus|nucleus|Prp19 complex|spliceosomal complex|defense response signaling pathway, resistance gene-dependent|defense response signaling pathway, resistance gene-independent|defense response to bacterium|defense response to fungus|innate immune response|mRNA processing|RNA splicing	ko03040	Spliceosome
LOC115708764	12.9318	25.5998	0.263894	0.012243	-6.3519	3.59e-06	8e-05	Down	0	0	0.0143695	0	0.0726492	0.496733	0.457712	0.374366	PAP27	At5g50400	GeneID:115708764	nucleotide pyrophosphatase/phosphodiesterase-like	GO:0005576,GO:0003993,GO:0046872	extracellular region|acid phosphatase activity|metal ion binding
LOC115708773	47.9229	85.2776	10.5683	0.126071	-2.98769	0.000224297	0.00283397	Down	0.204922	0.0813992	0.217334	0.0729683	0.146506	1.67936	2.02788	0.8682			GeneID:115708773	uncharacterized protein LOC115708773
LOC115708782	370.224	238.587	501.86	2.12233	1.08565	0.00207107	0.0169543	Up	9.5143	11.7643	9.42315	8.66515	7.34737	2.25679	4.30526	4.74632			GeneID:115708782	uncharacterized protein LOC115708782
LOC115708787	83.8989	135.895	31.9029	0.287379	-1.79897	0.000664622	0.00681245	Down	0.531582	0.380461	0.471342	0.559329	0.969637	1.07412	1.12955	5.15186	CYP94B1	At5g63450	GeneID:115708787	LOW QUALITY PROTEIN: cytochrome P450 94B3	GO:0016021,GO:0020037,GO:0005506,GO:0052694,GO:0016705,GO:0009694,GO:0009611	integral component of membrane|heme binding|iron ion binding|jasmonoyl-isoleucine-12-hydroxylase activity|oxidoreductase activity, acting on paired donors, with incorporation or reduction of molecular oxygen|jasmonic acid metabolic process|response to wounding
LOC115708808	9.67829	17.3671	1.98946	0.127898	-2.96693	0.00161226	0.0139475	Down	0.0291725	0.0309012	0.0495033	0.0138503	0.0500557	0.251656	0.445972	0.34392	RDUF1	At3g46620	GeneID:115708808	E3 ubiquitin-protein ligase SGR9, amyloplastic-like isoform X1	GO:0005737,GO:0005829,GO:0005634,GO:0046872,GO:0061630,GO:0004842,GO:0009738,GO:0051865,GO:0016567,GO:0009737,GO:0010200,GO:0009414	cytoplasm|cytosol|nucleus|metal ion binding|ubiquitin protein ligase activity|ubiquitin-protein transferase activity|abscisic acid-activated signaling pathway|protein autoubiquitination|protein ubiquitination|response to abscisic acid|response to chitin|response to water deprivation
LOC115708818	60.035	115.933	4.13757	0.0368873	-4.76073	0.000220519	0.00279415	Down	0	0.23417	0.321546	0	0.18063	7.37394	4.48312	3.78524		At3g12180	GeneID:115708818	protein cornichon homolog 1-like	GO:0016021,GO:0016192	integral component of membrane|vesicle-mediated transport
LOC115708825	696.239	354.395	1038.08	2.75635	1.46276	6.06e-06	0.000127281	Up	36.0318	39.2428	23.4403	13.1647	10.2824	7.21393	9.6214	11.151	HSFB3	At2g41690	GeneID:115708825	heat stress transcription factor B-3	GO:0005737,GO:0005634,GO:0003700,GO:0000978,GO:0043565,GO:0034605,GO:0061408,GO:0046686	cytoplasm|nucleus|DNA-binding transcription factor activity|RNA polymerase II proximal promoter sequence-specific DNA binding|sequence-specific DNA binding|cellular response to heat|positive regulation of transcription from RNA polymerase II promoter in response to heat stress|response to cadmium ion
LOC115708827	136.531	192.731	80.3298	0.415605	-1.26671	0.000689233	0.00698877	Down	1.46239	0.985758	2.27745	1.74928	2.15078	5.67961	3.33891	4.51535	AGAL2	At5g08370	GeneID:115708827	alpha-galactosidase-like	GO:0048046,GO:0009505,GO:0004557,GO:0052692,GO:0005975,GO:0071555,GO:0009965,GO:0009911,GO:0009620	apoplast|plant-type cell wall|alpha-galactosidase activity|raffinose alpha-galactosidase activity|carbohydrate metabolic process|cell wall organization|leaf morphogenesis|positive regulation of flower development|response to fungus	ko00052,ko00561,ko00600,ko00603	Galactose metabolism|Glycerolipid metabolism|Sphingolipid metabolism|Glycosphingolipid biosynthesis - globo and isoglobo series
LOC115708840	85.8331	167.962	3.704	0.0225036	-5.4737	3.85e-14	3.29e-12	Down	0.0557276	0.00843283	0	0.0604752	1.33868	1.75811	0.764999	1.83017	EIX1	Solyc07g00862011	GeneID:115708840	receptor-like protein EIX2	GO:0016021,GO:0005886,GO:0050832	integral component of membrane|plasma membrane|defense response to fungus
LOC115708845	141.264	269.577	12.9512	0.0480375	-4.37969	1.69e-05	0.000308534	Down	0.855063	0.905731	0.89822	0.695931	0.908242	49.034	1.46723	19.621			GeneID:115708845	uncharacterized protein LOC115708845
LOC115708847	17.8202	27.5604	8.08005	0.262061	-1.93203	0.00663321	0.0415224	Down	0.0424415	0.0749274	0.192053	0.174634	0.210379	0.764785	0.308962	0.389162	SPL13A	At5g50570	GeneID:115708847	squamosa promoter-binding-like protein 13A isoform X1	GO:0005634,GO:0003677,GO:0003700,GO:0046872,GO:0048653,GO:0006355	nucleus|DNA binding|DNA-binding transcription factor activity|metal ion binding|anther development|regulation of transcription, DNA-templated
LOC115708859	679.08	939.418	418.742	0.444054	-1.17119	2.93e-07	8.73e-06	Down	17.7837	13.5084	15.8387	22.0337	32.7447	50.7779	40.3285	32.7203			GeneID:115708859	uncharacterized protein LOC115708859
LOC115708873	63.2771	38.9572	87.5969	2.27823	1.18791	0.00025692	0.00317922	Up	1.4286	1.18178	1.21596	1.22733	0.793744	0.532075	0.356565	0.561402		At5g10820	GeneID:115708873	probable folate-biopterin transporter 6	GO:0016021	integral component of membrane
LOC115708878	321.779	485.377	158.182	0.339463	-1.55867	8.83e-06	0.000176175	Down	1.95662	1.20641	4.09659	2.55114	3.30715	7.33929	9.12017	10.6297	AATP1	At5g40010	GeneID:115708878	AAA-ATPase At3g28580-like	GO:0005783,GO:0016021,GO:0031966,GO:0005739,GO:0005524,GO:0016887,GO:0010154,GO:0009737,GO:0009409,GO:0009651,GO:0009414,GO:0010431	endoplasmic reticulum|integral component of membrane|mitochondrial membrane|mitochondrion|ATP binding|ATPase activity|fruit development|response to abscisic acid|response to cold|response to salt stress|response to water deprivation|seed maturation
LOC115708895	107.409	183.941	30.8779	0.178685	-2.48451	8.33e-05	0.00121166	Down	0.421904	0.645529	1.24626	0.75672	3.83412	1.77933	1.4077	11.2604	ACA7	At1g08080	GeneID:115708895	alpha carbonic anhydrase 7-like	GO:0009570,GO:0004089,GO:0008270	chloroplast stroma|carbonate dehydratase activity|zinc ion binding	ko00910	Nitrogen metabolism
LOC115708905	94.6503	2.81473	186.486	93.1125	6.5409	7.25e-08	2.52e-06	Up	5.78122	11.9641	2.08922	1.29614	0.0306164	0	0	0.289242			GeneID:115708905	carbonic anhydrase 2-like	GO:0009570,GO:0004089,GO:0008270,GO:0015976	chloroplast stroma|carbonate dehydratase activity|zinc ion binding|carbon utilization	ko00910	Nitrogen metabolism
LOC115708911	65.7252	131.45	0	0.0014573	-9.42249	0.00359257	0.0259267	Down	0	0	0	0	0	6.39292	7.49329	3.78267		Os05g0446300	GeneID:115708911	protein BUD31 homolog 2-like	GO:0005681,GO:0000398	spliceosomal complex|mRNA splicing, via spliceosome	ko03040	Spliceosome
LOC115708914	365.523	503.074	227.971	0.45951	-1.12183	0.00152521	0.013338	Down	9.09572	3.42798	4.60406	6.58817	13.0689	19.824	10.1463	9.56217	SGR9	At5g02750	GeneID:115708914	E3 ubiquitin-protein ligase SGR9, amyloplastic	GO:0009501,GO:0005737,GO:0046872,GO:0061630,GO:0004842,GO:0009630,GO:0016567	amyloplast|cytoplasm|metal ion binding|ubiquitin protein ligase activity|ubiquitin-protein transferase activity|gravitropism|protein ubiquitination
LOC115708921	649.189	1106.39	191.988	0.173527	-2.52677	4.87e-14	4.14e-12	Down	9.5205	5.29444	6.86609	10.5845	62.1213	27.878	45.5691	50.4296			GeneID:115708921	pectinesterase inhibitor
LOC115708948	788.946	1099.34	478.554	0.42763	-1.22557	0.0048836	0.032978	Down	11.2167	9.82371	4.43059	6.30715	11.881	11.3878	34.3154	16.2679	CYP736A117		GeneID:115708948	cytochrome P450 71A22-like
LOC115708959	235.677	464.71	6.64395	0.0100199	-6.64099	2.5e-12	1.72e-10	Down	0.0430232	0.0455726	0.146014	0.367672	0.3445	23.6786	12.1442	7.10093	MYB90	At1g66390	GeneID:115708959	transcription factor MYB113-like	GO:0005634,GO:0003700,GO:0043565,GO:0044212,GO:0030154,GO:0006355,GO:0080167	nucleus|DNA-binding transcription factor activity|sequence-specific DNA binding|transcription regulatory region DNA binding|cell differentiation|regulation of transcription, DNA-templated|response to karrikin	ko04712	Circadian rhythm - plant
LOC115708971	88.4378	134.393	42.4824	0.318203	-1.65198	1.05e-07	3.48e-06	Down	0.494883	0.476553	0.610746	1.1107	1.01211	1.79388	3.16047	2.68141	ABCG15	At3g21090	GeneID:115708971	ABC transporter G family member 15-like isoform X1	GO:0016021,GO:0005886,GO:0005524,GO:0042626,GO:0080167,GO:0055085	integral component of membrane|plasma membrane|ATP binding|ATPase activity, coupled to transmembrane movement of substances|response to karrikin|transmembrane transport
LOC115708972	28.3528	41.0457	15.6598	0.384912	-1.3774	0.00731085	0.044658	Down	0.144282	0.277877	0.133547	0.311369	0.255069	0.693986	0.744783	0.618536	ABCG15	At3g21090	GeneID:115708972	ABC transporter G family member 15-like	GO:0016021,GO:0005886,GO:0005524,GO:0042626,GO:0080167,GO:0055085	integral component of membrane|plasma membrane|ATP binding|ATPase activity, coupled to transmembrane movement of substances|response to karrikin|transmembrane transport
LOC115708987	55.3563	84.4316	26.281	0.310218	-1.68865	0.000345956	0.00406366	Down	0.68056	0.480592	0.217152	0.563373	0.998069	2.18776	1.81022	1.32007	UGT86A1	At2g36970	GeneID:115708987	UDP-glycosyltransferase 86A1-like	GO:0043231,GO:0080043,GO:0080044,GO:0008194	intracellular membrane-bounded organelle|quercetin 3-O-glucosyltransferase activity|quercetin 7-O-glucosyltransferase activity|UDP-glycosyltransferase activity
LOC115708999	127.338	251.795	2.88041	0.0118051	-6.40445	1.76e-10	9.35e-09	Down	0.0473182	0.0668295	0.0178434	0.0599076	0.108255	8.7806	4.20245	4.07536	DNMT2	At5g25480	GeneID:115708999	tRNA (cytosine(38)-C(5))-methyltransferase 2-like isoform X1	GO:0005634,GO:0008168,GO:0003723,GO:0045814,GO:0008033	nucleus|methyltransferase activity|RNA binding|negative regulation of gene expression, epigenetic|tRNA processing
LOC115709000	10.0067	20.0135	0	0.00910164	-6.77966	0.00208717	0.0170498	Down	0	0	0	0	0	0.735445	0.323559	0.291106	UGT86A1	At2g36970	GeneID:115709000	UDP-glycosyltransferase 86A1-like	GO:0043231,GO:0080043,GO:0080044,GO:0008194	intracellular membrane-bounded organelle|quercetin 3-O-glucosyltransferase activity|quercetin 7-O-glucosyltransferase activity|UDP-glycosyltransferase activity
LOC115709019	15.7481	25.8229	5.67323	0.21355	-2.22735	0.00616924	0.0394671	Down	0.0233667	0.0330017	0.0793027	0.0517713	0.0712778	0.385227	0.0850514	0.321387	SRL2	LOC_Os03g19520	GeneID:115709019	uncharacterized protein LOC115709019 isoform X1
LOC115709029	30.8691	6.24903	55.4892	13.2779	3.73095	0.000456045	0.00504804	Up	0.55746	0.371792	1.01603	0.490123	0.224368	0	0.0112726	0.0304259	RPPL1	At3g14470	GeneID:115709029	putative disease resistance RPP13-like protein 1, partial
LOC115709041	97.4791	138.12	56.8384	0.412226	-1.27849	0.00127368	0.0114894	Down	0.956154	1.37952	0.578137	1.04879	1.79148	3.65956	2.48419	1.81393	UGT86A1	At2g36970	GeneID:115709041	UDP-glycosyltransferase 86A1-like	GO:0043231,GO:0080043,GO:0080044,GO:0008194	intracellular membrane-bounded organelle|quercetin 3-O-glucosyltransferase activity|quercetin 7-O-glucosyltransferase activity|UDP-glycosyltransferase activity
LOC115709042	179.424	353.38	5.46752	0.0100416	-6.63787	0.000667324	0.00682426	Down	0.229161	0.097096	0	0.0290131	0	5.02559	13.7128	4.65279	CYP71AN24		GeneID:115709042	cytochrome P450 71A1-like
LOC115709056	23.0611	46.1221	0	0.00390623	-8.00001	9.17e-05	0.00131283	Down	0	0	0	0	0	1.58843	0.635726	0.478852	UGT86A1	At2g36970	GeneID:115709056	UDP-glycosyltransferase 86A1-like	GO:0043231,GO:0080043,GO:0080044,GO:0008194	intracellular membrane-bounded organelle|quercetin 3-O-glucosyltransferase activity|quercetin 7-O-glucosyltransferase activity|UDP-glycosyltransferase activity
LOC115709089	95.6352	42.3832	148.887	3.0474	1.60758	0.00500041	0.0335075	Up	5.10417	1.77457	2.16091	0.892018	0.82386	0.50424	0.376128	1.1075	CYP93A3		GeneID:115709089	cytochrome P450 93A3-like	GO:0016021,GO:0016020,GO:0020037,GO:0005506,GO:0016709	integral component of membrane|membrane|heme binding|iron ion binding|oxidoreductase activity,acting on paired donors, with incorporation or reduction of molecular oxygen, NAD(P)H as one donor, and incorporation of one atom of oxygen
LOC115709141	791.875	1071.96	511.788	0.482722	-1.05074	0.000189171	0.00245974	Down	11.5649	10.2811	10.7587	9.86655	11.5503	27.5492	30.0646	20.8972	tfa2		GeneID:115709141	uncharacterized protein LOC115709141	GO:0005730,GO:0005634,GO:0005673,GO:0003677,GO:0016251,GO:0006367	nucleolus|nucleus|transcription factor TFIIE complex|DNA binding|RNA polymerase II general transcription initiation factor activity|transcription initiation from RNA polymerase II promoter	ko03022	Basal transcription factors
LOC115709155	14.6622	2.23445	27.0899	27.107	4.76059	0.000810448	0.00797778	Up	0.317875	0.906529	0.165971	0.0116091	0.111882	0	0	0	WRKY72A	Solyc03g113120	GeneID:115709155	WRKY transcription factor 72A-like
LOC115709157	4.35199	8.4401	0.263894	0.0350551	-4.83423	0.00323127	0.0237856	Down	0	0	0.0166943	0	0.219448	0.0678939	0.0483422	0.188471	AZG2	At5g50300	GeneID:115709157	adenine/guanine permease AZG2	GO:0016021,GO:0005886,GO:0005345,GO:0005215,GO:0015853,GO:0015854,GO:0006863	integral component of membrane|plasma membrane|purine nucleobase transmembrane transporter activity|transporter activity|adenine transport|guanine transport|purine nucleobase transport
LOC115709185	309.969	494.126	125.812	0.251216	-1.993	2.81e-13	2.21e-11	Down	5.71304	3.30086	2.7419	3.64392	12.5422	18.4854	17.8015	12.1325	FT	At1g65480	GeneID:115709185	protein FLOWERING LOCUS T-like	GO:0005737,GO:0005783,GO:0005634,GO:0008429,GO:0030154,GO:0009908,GO:0048573,GO:0009911,GO:0009909,GO:0010119	cytoplasm|endoplasmic reticulum|nucleus|phosphatidylethanolamine binding|cell differentiation|flower development|photoperiodism, flowering|positive regulation of flower development|regulation of flower development|regulation of stomatal movement	ko04712	Circadian rhythm - plant
LOC115709208	12.6279	25.2559	0	0.00740874	-7.07656	0.000848461	0.00825047	Down	0	0	0	0	0	1.41417	1.55455	0.572164		At3g26920	GeneID:115709208	putative FBD-associated F-box protein At5g22720 isoform X1
LOC115709303	12625.6	18617.5	6633.63	0.342086	-1.54757	0.000167653	0.00221524	Down	34.275	71.5452	105.547	83.4312	81.6787	368.515	161.691	227.207			GeneID:115709303	uncharacterized protein LOC115709303
LOC115709313	1192.57	1740.72	644.42	0.36986	-1.43495	0.00182781	0.0153624	Down	9.80529	9.1303	13.1047	9.52708	10.5903	50.6899	38.1135	14.6661	CYP75B2		GeneID:115709313	flavonoid 3'-monooxygenase	GO:0005789,GO:0016021,GO:0020037,GO:0005506,GO:0004497,GO:0016705,GO:0009813	endoplasmic reticulum membrane|integral component of membrane|heme binding|iron ion binding|monooxygenase activity|oxidoreductase activity, acting on paired donors, with incorporation or reduction of molecular oxygen|flavonoid biosynthetic process	ko00941,ko00944	Flavonoid biosynthesis|Flavone and flavonol biosynthesis
LOC115709331	870.628	485.547	1255.71	2.58907	1.37243	6.33e-22	1.02e-19	Up	8.46916	9.55845	8.24104	10.1352	3.87672	3.50431	3.39416	3.36986	RPPL1	At3g14470	GeneID:115709331	putative disease resistance RPP13-like protein 1
LOC115709332	163.683	300.975	26.3913	0.0822711	-3.60347	1.36e-24	2.63e-22	Down	0.126648	0.110479	0.269693	0.325404	1.95152	2.99052	2.30219	2.33476	RPPL1	At3g14470	GeneID:115709332	putative disease resistance RPP13-like protein 1
LOC115709338	36.8513	23.4276	50.2751	2.13098	1.09152	0.00514789	0.0342925	Up	1.32717	1.35561	1.47459	0.90015	0.704858	0.463405	0.46582	0.721779			GeneID:115709338	uncharacterized protein LOC115709338
LOC115709339	11.2581	18.7103	3.80589	0.18429	-2.43995	0.00802773	0.0480031	Down	0.0472376	0.0500367	0.534389	0.134562	0.864562	1.03232	1.13479	0.742524	FMOGS-OX5	At1g12140	GeneID:115709339	flavin-containing monooxygenase FMO GS-OX-like 2 isoform X2	GO:0080107,GO:0050660,GO:0004497,GO:0004499,GO:0050661,GO:0019761	8-methylthiopropyl glucosinolate S-oxygenase activity|flavin adenine dinucleotide binding|monooxygenase activity|N,N-dimethylaniline monooxygenase activity|NADP binding|glucosinolate biosynthetic process
LOC115709448	39.8583	60.5818	19.1349	0.312217	-1.67938	0.000457392	0.0050513	Down	0.206455	0.126166	0.215592	0.0980189	0.363329	0.849389	0.433538	0.413457	RPPL1	At3g14470	GeneID:115709448	putative disease resistance RPP13-like protein 1
LOC115709454	3.46371	0	6.92742	36.4542	5.18801	0.00326945	0.0240114	Up	0.19048	0.172943	0.123135	0.310062	0	0	0	0	RPPL1	At3g14470	GeneID:115709454	LOW QUALITY PROTEIN: putative disease resistance RPP13-like protein 1
LOC115709464	40.8235	8.59594	73.051	10.6426	3.41178	1.86e-05	0.000334608	Up	1.5949	1.66527	1.93315	1.86058	0.026063	0.0262064	0.547348	0.246224			GeneID:115709464	PITH domain-containing protein 1
LOC115709468	1839.16	3538.7	139.615	0.0451978	-4.4676	0.000290943	0.00351834	Down	4.91886	1.9827	1.96977	4.00934	4.53123	23.0061	293.443	13.7704	APX2	At3g09640	GeneID:115709468	L-ascorbate peroxidase 2, cytosolic	GO:0009507,GO:0005829,GO:0020037,GO:0016688,GO:0046872,GO:0004601,GO:0034599,GO:0042744,GO:0006979,GO:0000302	chloroplast|cytosol|heme binding|L-ascorbate peroxidase activity|metal ion binding|peroxidase activity|cellular response to oxidative stress|hydrogen peroxide catabolic process|response to oxidative stress|response to reactive oxygen species	ko00053,ko00480	Ascorbate and aldarate metabolism|Glutathione metabolism
LOC115709473	89.9444	179.889	0	0.00145011	-9.42962	0.00533006	0.03531	Down	0	0	0	0	0	0	2.91539	0.640078	CALS10	At2g36850	GeneID:115709473	callose synthase 10-like isoform X4	GO:0000148,GO:0005794,GO:0016021,GO:0005886,GO:0009506,GO:0003843,GO:0006075,GO:0071555,GO:0048589,GO:0009556,GO:0009555,GO:0008360	1,3-beta-D-glucan synthase complex|Golgi apparatus|integral component of membrane|plasma membrane|plasmodesma|1,3-beta-D-glucan synthase activity|(1->3)-beta-D-glucan biosynthetic process|cell wall organization|developmental growth|microsporogenesis|pollen development|regulation of cell shape
LOC115709483	15.3234	30.6469	0	0.00585076	-7.41716	3.52e-09	1.55e-07	Down	0	0	0	0	0.267668	0.437354	0.244867	0.32567	RPPL1	At3g14470	GeneID:115709483	putative disease resistance RPP13-like protein 1
LOC115709487	192.836	362.724	22.9468	0.116975	-3.09573	0.000151542	0.00202249	Down	0.449408	0.571246	0.762608	0.405396	2.33906	1.39565	1.2023	29.758	CML18	Os05g0223000	GeneID:115709487	probable calcium-binding protein CML23	GO:0005509	calcium ion binding	ko04626	Plant-pathogen interaction
LOC115709508	4.86952	9.73904	0	0.0193576	-5.69096	0.000336733	0.00397233	Down	0	0	0	0	0.15231	0.344584	0.436182	0.457838			GeneID:115709508	uncharacterized protein LOC115709508
LOC115709513	266.804	84.3952	449.212	5.39884	2.43265	0.000117813	0.00163364	Up	6.33212	6.67862	6.35042	6.45038	2.07838	0.124765	1.61386	1.01239			GeneID:115709513	uncharacterized protein LOC115709513
LOC115709517	19.4233	7.17441	31.6721	4.41662	2.14294	0.00251334	0.0196935	Up	0.945288	0.600782	0.475282	0.79786	0.096117	0.338261	0.0458762	0.165099			GeneID:115709517	uncharacterized protein LOC115709517
LOC115709549	251.579	399.209	103.949	0.260331	-1.94158	5.57e-16	5.63e-14	Down	1.84661	1.49031	1.7077	1.41945	5.34791	8.84985	5.20108	5.58649	ADE13	YLR359W	GeneID:115709549	uncharacterized protein LOC115709549 isoform X1	GO:0070626,GO:0004018,GO:0044208,GO:0006189,GO:0006164	(S)-2-(5-amino-1-(5-phospho-D-ribosyl)imidazole-4-carboxamido)succinate AMP-lyase (fumarate-forming) activity|N6-(1,2-dicarboxyethyl)AMP AMP-lyase (fumarate-forming) activity|'de novo' AMP biosynthetic process|'de novo' IMP biosynthetic process|purine nucleotide biosynthetic process	ko00230,ko00250	Purine metabolism|Alanine, aspartate and glutamate metabolism
LOC115709560	1677.14	1110.16	2244.11	2.02241	1.01607	2.47e-05	0.000427558	Up	17.5299	15.9698	16.6943	18.8303	9.62353	5.03445	9.87612	9.71988			GeneID:115709560	uncharacterized protein LOC115709560 isoform X1	GO:0005737,GO:0005829,GO:0000329,GO:0005634,GO:0019901,GO:0005200	cytoplasm|cytosol|fungal-type vacuole membrane|nucleus|protein kinase binding|structural constituent of cytoskeleton
LOC115709561	380.976	743.73	18.2221	0.0246728	-5.34093	1.4e-33	4.41e-31	Down	0.184906	0.125352	0.0920391	0.168553	3.11348	9.83423	3.86858	6.75766			GeneID:115709561	LOW QUALITY PROTEIN: uncharacterized protein LOC115709561	GO:0005737,GO:0005829,GO:0000329,GO:0005634,GO:0019901,GO:0005200	cytoplasm|cytosol|fungal-type vacuole membrane|nucleus|protein kinase binding|structural constituent of cytoskeleton
LOC115709562	44.122	87.4827	0.761276	0.00840904	-6.89384	7.85e-13	5.73e-11	Down	0.0110034	0	0.0248957	0	0.843313	1.27826	0.708897	1.27559		At4g19890	GeneID:115709562	pentatricopeptide repeat-containing protein At4g19890-like
LOC115709567	22.1175	40.1448	4.0903	0.103303	-3.27504	2.53e-07	7.7e-06	Down	0.0717982	0.0760527	0.0324895	0.0681755	0.361372	0.87537	0.454723	0.775906	NMT2	At1g48600	GeneID:115709567	phosphomethylethanolamine N-methyltransferase-like	GO:0005737,GO:0000234,GO:0052667,GO:0006656	cytoplasm|phosphoethanolamine N-methyltransferase activity|phosphomethylethanolamine N-methyltransferase activity|phosphatidylcholine biosynthetic process	ko00564	Glycerophospholipid metabolism
LOC115709570	35.6982	71.3963	0	0.00252482	-8.62961	3.23e-14	2.77e-12	Down	0	0	0	0	0.977838	1.67967	1.16679	1.60964	SURF1	At3g17910	GeneID:115709570	surfeit locus protein 1-like	GO:0016021,GO:0005743,GO:0005739	integral component of membrane|mitochondrial inner membrane|mitochondrion
LOC115709576	83.9054	48.4142	119.396	2.46217	1.29993	0.00400175	0.0282966	Up	5.65826	3.01247	2.2454	4.07881	1.99936	0.851848	2.13501	1.10595	Y-3	At3g17950	GeneID:115709576	uncharacterized protein At3g17950
LOC115709577	21.2466	37.5614	4.93183	0.108046	-3.21028	0.00139292	0.0123733	Down	0.185351	0.510468	0.0419366	0.0351997	0.508855	3.45367	1.49772	0.546284			GeneID:115709577	LOW QUALITY PROTEIN: uncharacterized protein LOC115709577
LOC115709590	70.8535	20.4462	121.261	6.02991	2.59214	0.00662714	0.0415115	Up	3.23012	2.18483	2.94975	1.66291	0.979382	0.0447624	0.0212479	0.611736		At1g56140	GeneID:115709590	probable LRR receptor-like serine/threonine-protein kinase At1g56140
LOC115709616	1666.44	3112.88	219.994	0.0595971	-4.06861	8.01e-05	0.00117194	Down	0.799978	1.29063	6.09829	3.30724	1.46415	90.3003	34.861	38.9335	PAP27	At5g50400	GeneID:115709616	probable inactive purple acid phosphatase 27	GO:0005576,GO:0003993,GO:0046872	extracellular region|acid phosphatase activity|metal ion binding
LOC115709624	17600.7	3603.06	31598.4	7.93006	2.98733	3.31e-05	0.000547351	Up	117.133	236.371	832.113	469.242	73.2337	20.9924	60.624	33.3394	PAP27	At5g50400	GeneID:115709624	probable inactive purple acid phosphatase 27	GO:0005576,GO:0003993,GO:0046872	extracellular region|acid phosphatase activity|metal ion binding
LOC115709644	425.598	630.084	221.112	0.348992	-1.51873	0.000113313	0.00157809	Down	6.89605	4.98186	6.85474	8.30157	9.50568	33.7517	21.1097	13.7766		At5g50100	GeneID:115709644	uncharacterized protein At5g50100, chloroplastic	GO:0009507,GO:0005739,GO:0015035,GO:0042246	chloroplast|mitochondrion|protein disulfide oxidoreductase activity|tissue regeneration
LOC115709722	4.07952	7.66165	0.497382	0.0701527	-3.83336	0.00802843	0.0480031	Down	0.00669446	0	0.0075733	0	0.0153156	0.0615996	0.0511705	0.092076	RPPL1	At3g14470	GeneID:115709722	putative disease resistance RPP13-like protein 1
LOC115709723	31.0932	61.9226	0.263894	0.00477304	-7.71087	4.92e-10	2.44e-08	Down	0	0	0.00754779	0	0.244224	0.798097	0.269561	0.458829	RPPL1	At3g14470	GeneID:115709723	putative disease resistance RPP13-like protein 1 isoform X1
LOC115709725	50.2041	89.7179	10.6904	0.0790535	-3.66103	3.37e-06	7.56e-05	Down	0	0.0546375	0.0666885	0.209907	0.404596	0.949252	0.297714	1.17276	RPPL1	At3g14470	GeneID:115709725	putative disease resistance RPP13-like protein 1 isoform X1
LOC115709726	7.41737	2.03086	12.8039	6.296	2.65444	0.00645737	0.040794	Up	0.126542	0.0502651	0.12526	0.127667	0.0271409	0	0.0172723	0.0233098	RPPL1	At3g14470	GeneID:115709726	putative disease resistance RPP13-like protein 1
LOC115709742	341.651	659.484	23.8184	0.0378902	-4.72203	1.69e-08	6.61e-07	Down	0.488607	0.30191	0.806095	0.463954	0.349324	27.5143	14.2944	15.8408	TFIIB1		GeneID:115709742	transcription initiation factor IIB	GO:0005634,GO:0046872,GO:0017025,GO:0006355,GO:0070897	nucleus|metal ion binding|TBP-class protein binding|regulation of transcription, DNA-templated|transcription preinitiation complex assembly	ko03022	Basal transcription factors
LOC115709749	86.4164	55.4524	117.38	2.04064	1.02902	0.0037821	0.0269819	Up	1.66352	1.13904	1.09172	0.689434	0.399505	0.507416	0.722585	0.550786		At1g50180	GeneID:115709749	putative disease resistance protein At1g50180
LOC115709759	113.696	52.6592	174.733	3.58197	1.84075	0.00645648	0.040794	Up	4.39359	8.1444	1.8777	3.61566	3.23887	0.4492	0.453109	1.22298	ERN1		GeneID:115709759	ethylene-responsive transcription factor ERF087-like	GO:0005634,GO:0003677,GO:0003700,GO:0009877,GO:0006355	nucleus|DNA binding|DNA-binding transcription factor activity|nodulation|regulation of transcription, DNA-templated
LOC115709812	867.685	1389.11	346.256	0.244816	-2.03023	1.36e-13	1.1e-11	Down	3.3115	1.73765	2.22973	1.72623	7.55505	11.1732	6.831	10.7161	RPPL1	At3g14470	GeneID:115709812	putative disease resistance RPP13-like protein 1
LOC115709813	458.023	735.842	180.205	0.245143	-2.0283	1.36e-12	9.57e-11	Down	1.64516	1.32283	1.41277	1.33493	4.05465	8.41196	4.19716	6.86176	RPPL1	At3g14470	GeneID:115709813	putative disease resistance RPP13-like protein 1
LOC115709816	106.245	151.177	61.3141	0.406111	-1.30005	7.36e-05	0.00109498	Down	0.731415	0.747086	1.04907	0.868138	1.21018	3.00454	1.89685	2.34817		At1g26500	GeneID:115709816	putative pentatricopeptide repeat-containing protein At1g26500
LOC115709818	2883.97	4081.01	1686.93	0.420162	-1.25098	1.27e-16	1.38e-14	Down	36.9129	27.7563	32.36	28.4264	92.0883	89.9944	60.4035	61.5083	RER4	At5g12470	GeneID:115709818	protein RETICULATA-RELATED 4, chloroplastic-like	GO:0009507,GO:0009941,GO:0009706,GO:0016021,GO:0005739,GO:0009536,GO:0007275	chloroplast|chloroplast envelope|chloroplast inner membrane|integral component of membrane|mitochondrion|plastid|multicellular organism development
LOC115709832	11.0605	0	22.121	114.634	6.8409	2e-07	6.23e-06	Up	0.657963	0.33852	0.467871	0.303457	0	0	0	0	RE1	At1g59265	GeneID:115709832	uncharacterized protein LOC115709832	GO:0000943,GO:0004190,GO:0004519,GO:0046872,GO:0003676,GO:0003964,GO:0015074,GO:0006310	retrotransposon nucleocapsid|aspartic-type endopeptidase activity|endonuclease activity|metal ion binding|nucleic acid binding|RNA-directed DNA polymerase activity|DNA integration|DNA recombination
LOC115709845	355.628	226.687	484.569	2.14107	1.09834	6.56e-09	2.78e-07	Up	7.2582	7.99712	7.6729	8.56762	2.63298	4.1477	4.6582	3.45228	CYP75B2		GeneID:115709845	flavonoid 3'-monooxygenase-like isoform X1	GO:0005789,GO:0016021,GO:0020037,GO:0005506,GO:0004497,GO:0016705,GO:0009813	endoplasmic reticulum membrane|integral component of membrane|heme binding|iron ion binding|monooxygenase activity|oxidoreductase activity, acting on paired donors, with incorporation or reduction of molecular oxygen|flavonoid biosynthetic process	ko00941,ko00944	Flavonoid biosynthesis|Flavone and flavonol biosynthesis
LOC115709868	162.878	252.877	72.8786	0.289643	-1.78765	0.000321435	0.00382713	Down	1.81863	1.71235	2.15897	1.25784	6.62624	9.03855	1.64263	6.81585	SAE1B-1	At5g50580	GeneID:115709868	SUMO-activating enzyme subunit 1B-1-like	GO:0005737,GO:0005634,GO:0019948,GO:0016925	cytoplasm|nucleus|SUMO activating enzyme activity|protein sumoylation	ko04120	Ubiquitin mediated proteolysis
LOC115709875	8.95071	17.9014	0	0.0104631	-6.57854	0.00276285	0.0211903	Down	0	0	0	0	0	0.369929	0.351198	0.169271	PCMP-E78	At2g20540	GeneID:115709875	pentatricopeptide repeat-containing protein At2g20540-like
LOC115709876	342.57	681.965	3.17485	0.00478062	-7.70859	2.76e-06	6.3e-05	Down	0.115696	0	0.10907	0.0366195	0.0220575	23.7757	20.4873	12.6166			GeneID:115709876	probable leucine-rich repeat receptor-like protein kinase At1g35710
LOC115709881	390.988	780.071	1.90366	0.00239024	-8.70863	3.81e-06	8.42e-05	Down	0.0295141	0	0.0333886	0.0560498	0	21.3866	19.643	8.82915	FTSZ2-1	At2g36250	GeneID:115709881	LOW QUALITY PROTEIN: cell division protein FtsZ homolog 2-2, chloroplastic-like	GO:0009507,GO:0009570,GO:0009534,GO:0009535,GO:0005737,GO:0005525,GO:0003924,GO:0043621,GO:0010020	chloroplast|chloroplast stroma|chloroplast thylakoid|chloroplast thylakoid membrane|cytoplasm|GTP binding|GTPase activity|protein self-association|chloroplast fission
LOC115709893	66.6237	131.761	1.48617	0.0117314	-6.41348	7.1e-06	0.000145535	Down	0	0.0838708	0	0.0150368	0.0181146	4.4625	2.09233	2.44254	BAT2		GeneID:115709893	1-acyl-sn-glycerol-3-phosphate acyltransferase BAT2, chloroplastic-like	GO:0031969,GO:0016021,GO:0003841,GO:0016024	chloroplast membrane|integral component of membrane|1-acylglycerol-3-phosphate O-acyltransferase activity|CDP-diacylglycerol biosynthetic process	ko00561,ko00564	Glycerolipid metabolism|Glycerophospholipid metabolism
LOC115709896	14.3725	28.745	0	0.00645476	-7.27542	0.000475652	0.00521814	Down	0	0	0	0	0	1.4535	0.875709	0.692374		At5g64680	GeneID:115709896	mediator-associated protein 2-like	GO:0016592,GO:0005730	mediator complex|nucleolus
LOC115709902	553.314	854.559	252.069	0.288107	-1.79532	7.51e-06	0.000153421	Down	2.29629	3.63188	7.57971	3.33038	9.98516	21.9616	13.4131	12.1914	BGLU44	At3g18080	GeneID:115709902	beta-glucosidase 44-like isoform X1	GO:0005618,GO:0022626,GO:0005576,GO:0009505,GO:0080081,GO:0047668,GO:0080083,GO:0008422,GO:0004567,GO:0080079,GO:0080082,GO:0046872,GO:0102483,GO:0005975	cell wall|cytosolic ribosome|extracellular region|plant-type cell wall|4-methylumbelliferyl-beta-D-glucopyranoside beta-glucosidase activity|amygdalin beta-glucosidase activity|beta-gentiobiose beta-glucosidase activity|beta-glucosidase activity|beta-mannosidase activity|cellobiose glucosidase activity|esculin beta-glucosidase activity|metal ion binding|scopolin beta-glucosidase activity|carbohyd…	ko00460,ko00500,ko00940	Cyanoamino acid metabolism|Starch and sucrose metabolism|Phenylpropanoid biosynthesis
LOC115709941	293.46	423.184	163.737	0.388772	-1.363	0.000933237	0.00891239	Down	1.20297	0.891978	0.937505	1.59918	1.16202	4.4815	4.00646	2.52125	mot1		GeneID:115709941	DNA annealing helicase and endonuclease ZRANB3 isoform X1	GO:0005829,GO:0005634,GO:0005524,GO:0016887,GO:0003677,GO:0004386,GO:0042393,GO:0043044,GO:0006952,GO:0009873,GO:0009908,GO:0010199,GO:1900150,GO:0010104,GO:0040029,GO:2000022,GO:0006355,GO:0009611	cytosol|nucleus|ATP binding|ATPase activity|DNA binding|helicase activity|histone binding|ATP-dependent chromatin remodeling|defense response|ethylene-activated signaling pathway|flower development|organ boundary specification between lateral organs and the meristem|regulation of defense response to fungus|regulation of ethylene-activated signaling pathway|regulation of gene expression, epigeneti…
LOC115709958	2178.78	1283.84	3073.73	2.45577	1.29617	0.000211064	0.00270232	Up	57.4562	53.3999	47.427	42.203	37.8583	10.4011	14.5094	20.3366			GeneID:115709958	probable aspartyl aminopeptidase	GO:0005737,GO:0004177,GO:0008237,GO:0008270	cytoplasm|aminopeptidase activity|metallopeptidase activity|zinc ion binding
LOC115709966	62.1388	103.828	20.4495	0.202344	-2.30512	0.00230389	0.0184053	Down	0.341574	0.180907	0.317412	0.220087	0.125591	2.51161	1.46529	1.36626			GeneID:115709966	signal recognition particle subunit SRP68-like			ko03060	Protein export
LOC115709980	267.068	144.908	389.228	2.68621	1.42557	1.35e-10	7.36e-09	Up	3.24583	3.19439	3.20509	3.44377	1.47972	0.885415	1.14389	1.3722	RGA4		GeneID:115709980	putative disease resistance protein RGA4	GO:0043531,GO:0005524,GO:0006952	ADP binding|ATP binding|defense response
LOC115709981	11.003	22.0061	0	0.00816175	-6.93691	2.87e-06	6.54e-05	Down	0	0	0	0	0.23796	0.492613	0.0935341	0.324588	HAK5	Os01g0930400	GeneID:115709981	potassium transporter 5-like	GO:0016021,GO:0016020,GO:0015079,GO:0006813	integral component of membrane|membrane|potassium ion transmembrane transporter activity|potassium ion transport
LOC115709982	139.647	266.54	12.754	0.0483738	-4.36963	2.72e-18	3.48e-16	Down	0.16028	0.143658	0.223165	0.140486	1.25521	5.87095	3.27151	3.7307			GeneID:115709982	uncharacterized protein LOC115709982
LOC115709983	68.3138	102.141	34.4867	0.339751	-1.55745	1.92e-05	0.000344663	Down	0.451698	0.632808	0.560448	0.48425	0.983394	2.17872	1.28878	1.9182			GeneID:115709983	putative disease resistance protein RGA4
LOC115709985	31.3147	59.7731	2.85627	0.0513753	-4.28278	0.000138426	0.00186953	Down	0.0880268	0.0745944	0	0.0501512	0.0402776	1.61997	1.28803	1.59124	ZOX1		GeneID:115709985	zeatin O-glucosyltransferase-like	GO:0016758,GO:0050404,GO:0009690,GO:0006486	transferase activity, transferring hexosyl groups|zeatin O-beta-D-xylosyltransferase activity|cytokinin metabolic process|protein glycosylation	ko00908	Zeatin biosynthesis
LOC115710016	75.3126	143.822	6.80293	0.0477694	-4.38777	1.34e-16	1.45e-14	Down	0.145633	0.24682	0.395403	0.0553138	5.99722	5.3602	2.83064	3.57686			GeneID:115710016	uncharacterized protein LOC115710016 isoform X1
LOC115710023	45.3144	90.6289	0	0.00197825	-8.98156	1.08e-14	9.51e-13	Down	0	0	0	0	2.76979	5.8396	2.68667	3.83681	Y-3	At3g17950	GeneID:115710023	uncharacterized protein At3g17950-like
LOC115710029	743.78	1480.79	6.77396	0.00467102	-7.74205	7.17e-54	5.3e-51	Down	0.143588	0.118297	0.0902434	0.106045	8.74178	35.6917	34.6685	22.6019			GeneID:115710029	LOW QUALITY PROTEIN: probable aspartyl aminopeptidase	GO:0005737,GO:0004177,GO:0008237,GO:0008270	cytoplasm|aminopeptidase activity|metallopeptidase activity|zinc ion binding
LOC115710031	126.605	241.726	11.4835	0.0485114	-4.36553	3.96e-06	8.76e-05	Down	0.329688	0.0735208	0.314079	0.131812	0.119094	7.40449	7.27589	3.35829			GeneID:115710031	LOW QUALITY PROTEIN: uncharacterized protein LOC115710031
LOC115710042	164.149	326.867	1.43084	0.00439451	-7.83008	1.12e-06	2.81e-05	Down	0.0076198	0.00807133	0.00862012	0.021706	0	4.68888	2.91218	3.15907	RPPL1	At3g14470	GeneID:115710042	putative disease resistance RPP13-like protein 1
LOC115710045	58.4942	106.087	10.9012	0.106816	-3.2268	7.58e-06	0.0001543	Down	0.0961253	0.0469945	0.0501898	0.147445	0.118416	1.20769	1.2838	0.777286	RPPL1	At3g14470	GeneID:115710045	putative disease resistance RPP13-like protein 1
LOC115710063	69.0682	132.966	5.1708	0.0383756	-4.70367	1.19e-21	1.87e-19	Down	0.0480396	0.0915953	0.0434769	0.0273694	1.01113	1.73501	1.29045	1.42531	PAP27	At5g50400	GeneID:115710063	probable inactive purple acid phosphatase 27	GO:0005576,GO:0003993,GO:0046872	extracellular region|acid phosphatase activity|metal ion binding
LOC115710068	1234.19	2458.77	9.61712	0.00366887	-8.09045	2.51e-08	9.6e-07	Down	0.100972	0.115183	0.0790805	0.0221255	0.0177695	41.1395	20.4824	20.9156	ACA4	At2g41560	GeneID:115710068	calcium-transporting ATPase 4, plasma membrane-type-like	GO:0009507,GO:0005887,GO:0000325,GO:0009705,GO:0005774,GO:0005773,GO:0005524,GO:0005388,GO:0005516,GO:0046872,GO:0055081,GO:0042742,GO:0043069,GO:0009624	chloroplast|integral component of plasma membrane|plant-type vacuole|plant-type vacuole membrane|vacuolar membrane|vacuole|ATP binding|calcium-transporting ATPase activity|calmodulin binding|metal ion binding|anion homeostasis|defense response to bacterium|negative regulation of programmed cell death|response to nematode
LOC115710078	70.5878	125.609	15.5664	0.159441	-2.64891	0.00657076	0.0413015	Down	0.630192	0.709256	0.891154	0.373997	0.405494	1.13257	17.2896	2.63127	RPL18AB	At2g34480	GeneID:115710078	60S ribosomal protein L18a-2-like	GO:0005829,GO:0022625,GO:0022626,GO:0005634,GO:0005886,GO:0042788,GO:0005774,GO:0003729,GO:0003735,GO:0009793,GO:0009860,GO:0006412	cytosol|cytosolic large ribosomal subunit|cytosolic ribosome|nucleus|plasma membrane|polysomal ribosome|vacuolar membrane|mRNA binding|structural constituent of ribosome|embryo development ending in seed dormancy|pollen tube growth|translation	ko03010	Ribosome
LOC115710085	75.8221	147.818	3.82605	0.0268947	-5.21653	6.76e-08	2.35e-06	Down	0.0708805	0.0300323	0.0481114	0.080765	0.0648643	4.35352	2.35292	2.28404	GPDHC1	At2g41540	GeneID:115710085	Glycerol-3-phosphate dehydrogenase, NAD-dependent	GO:0005829,GO:0009331,GO:0047952,GO:0004367,GO:0051287,GO:0005975,GO:0046168,GO:0006072,GO:0006116	cytosol|glycerol-3-phosphate dehydrogenase complex|glycerol-3-phosphate dehydrogenase [NAD(P)+] activity|glycerol-3-phosphate dehydrogenase [NAD+] activity|NAD binding|carbohydrate metabolic process|glycerol-3-phosphate catabolic process|glycerol-3-phosphate metabolic process|NADH oxidation	ko00564	Glycerophospholipid metabolism
LOC115710090	198.168	383.481	12.8546	0.0313672	-4.9946	1.06e-07	3.51e-06	Down	0.385604	0.259925	0.178456	0.133145	0.120298	15.6039	6.79444	6.54343	TIF3E1	At3g57290	GeneID:115710090	eukaryotic translation initiation factor 3 subunit E	GO:0005737,GO:0005829,GO:0031597,GO:0016282,GO:0033290,GO:0005852,GO:0071540,GO:0005634,GO:0005886,GO:0003729,GO:0003743,GO:0030371,GO:0006352,GO:0009908,GO:0001732,GO:0009640,GO:0009651,GO:0006412,GO:0006413	cytoplasm|cytosol|cytosolic proteasome complex|eukaryotic 43S preinitiation complex|eukaryotic 48S preinitiation complex|eukaryotic translation initiation factor 3 complex|eukaryotic translation initiation factor 3 complex, eIF3e|nucleus|plasma membrane|mRNA binding|translation initiation factor activity|translation repressor activity|DNA-templated transcription, initiation|flower development|for…	ko03013	RNA transport
LOC115710093	181.51	245.559	117.461	0.479892	-1.05922	0.00556087	0.0364369	Down	1.47455	1.61074	1.30322	1.34546	1.3573	4.71706	3.44672	2.63699	LPL1	YOR059C	GeneID:115710093	putative lipase ROG1
LOC115710097	33.7577	66.748	0.767473	0.0114761	-6.44522	1.32e-05	0.00024864	Down	0	0.0323119	0.0172545	0	0.017447	2.49111	0.766118	1.12382		At3g10140	GeneID:115710097	DNA repair protein recA homolog 2, mitochondrial-like isoform X1	GO:0005739,GO:0005524,GO:0008094,GO:0003697,GO:0006310,GO:0006281,GO:0000002,GO:0009408	mitochondrion|ATP binding|DNA-dependent ATPase activity|single-stranded DNA binding|DNA recombination|DNA repair|mitochondrial genome maintenance|response to heat
LOC115710098	284.733	76.0026	493.463	5.16659	2.36921	0.00120187	0.0109705	Up	26.8983	2.85801	12.2093	1.8131	2.06551	0.787781	1.38247	2.44683	GNS1		GeneID:115710098	glucan endo-1,3-beta-glucosidase, basic isoform-like isoform X1	GO:0042973,GO:0005975,GO:0006952,GO:0009607	glucan endo-1,3-beta-D-glucosidase activity|carbohydrate metabolic process|defense response|response to biotic stimulus
LOC115710102	25.8621	15.621	36.1033	2.30222	1.20303	0.00221041	0.0178362	Up	0.967546	1.02488	0.880991	0.739464	0.431913	0.325718	0.463838	0.347762	RGA2		GeneID:115710102	disease resistance protein RGA2-like	GO:0043531,GO:0005524,GO:0006952	ADP binding|ATP binding|defense response
LOC115710105	6.91192	13.8238	0	0.0129798	-6.26759	0.00809432	0.0482468	Down	0	0	0	0	0	0.817098	0.375351	0.180108	GNS1		GeneID:115710105	LOW QUALITY PROTEIN: glucan endo-1,3-beta-glucosidase, basic isoform-like	GO:0042973,GO:0005975,GO:0006952,GO:0009607	glucan endo-1,3-beta-D-glucosidase activity|carbohydrate metabolic process|defense response|response to biotic stimulus
LOC115710107	184.686	357.027	12.3443	0.0346007	-4.85306	3.6e-08	1.31e-06	Down	0.419381	0.339707	0.251172	0.281097	0.253975	20.4014	9.2128	8.21603	SFGH	At2g41530	GeneID:115710107	S-formylglutathione hydrolase-like	GO:0048046,GO:0005829,GO:0052689,GO:0018738,GO:0046294,GO:0046686	apoplast|cytosol|carboxylic ester hydrolase activity|S-formylglutathione hydrolase activity|formaldehyde catabolic process|response to cadmium ion
LOC115710114	178.631	357.261	0	0.000515961	-10.9205	0.00124894	0.0113088	Down	0	0	0	0	0	22.2267	9.26764	11.1899			GeneID:115710114	uncharacterized protein At2g39795, mitochondrial-like	GO:0005737,GO:0005759,GO:0005739,GO:0097177,GO:0003729,GO:0008494,GO:0070131	cytoplasm|mitochondrial matrix|mitochondrion|mitochondrial ribosome binding|mRNA binding|translation activator activity|positive regulation of mitochondrial translation
LOC115710120	96.0443	137.062	55.0261	0.398958	-1.32569	0.000823769	0.00806714	Down	1.37052	1.27026	0.913649	2.13796	2.07165	5.23577	3.66119	3.41418			GeneID:115710120	uncharacterized protein LOC115710120 isoform X1
LOC115710122	104.396	208.098	0.694201	0.00316386	-8.3041	0.000133485	0.00181686	Down	0.0708262	0	0	0.0336263	0	19.307	8.19796	4.41846	H3.1		GeneID:115710122	histone H3.2-like	GO:0000786,GO:0005634,GO:0003677,GO:0046982	nucleosome|nucleus|DNA binding|protein heterodimerization activity
LOC115710123	130.141	258.975	1.30736	0.00466518	-7.74385	0.000487604	0.0053207	Down	0	0.0277877	0.118708	0	0	14.5435	7.87752	6.95853			GeneID:115710123	uncharacterized protein LOC115710123 isoform X2
LOC115710126	5.49682	10.7601	0.233489	0.0277038	-5.17377	0.0017293	0.0146564	Down	0.0206313	0	0	0	0.0236002	0.284761	0.428042	0.222957			GeneID:115710126	disease resistance protein RGA2-like
LOC115710127	125.436	248.212	2.6591	0.0107377	-6.54117	3.09e-09	1.37e-07	Down	0.0900275	0.0238405	0.0763846	0.0641138	0.0772369	14.0827	6.85686	3.18405			GeneID:115710127	histone H3.2-like	GO:0000786,GO:0005634,GO:0003677,GO:0046982	nucleosome|nucleus|DNA binding|protein heterodimerization activity
LOC115710164	360.53	238.853	482.207	2.02268	1.01627	0.00687109	0.0426088	Up	6.73388	7.2492	5.75482	5.20101	2.90254	1.43119	5.14185	2.96023	PAP27	At5g50400	GeneID:115710164	probable inactive purple acid phosphatase 27 isoform X1	GO:0005576,GO:0003993,GO:0046872	extracellular region|acid phosphatase activity|metal ion binding
LOC115710209	131.981	259.135	4.82694	0.0190248	-5.71597	4.9e-09	2.13e-07	Down	0.0495151	0.0786738	0.0420115	0.0822793	0.0566404	6.99087	3.94699	2.88223	BPG2	At3g57180	GeneID:115710209	GTP-binding protein BRASSINAZOLE INSENSITIVE PALE GREEN 2, chloroplastic-like	GO:0009507,GO:0009570,GO:0005525,GO:0016787,GO:0019843,GO:0009742,GO:0009658,GO:1901259,GO:0032502,GO:1904143,GO:1902326,GO:0006355,GO:0009646,GO:0009741,GO:0009416,GO:0009651	chloroplast|chloroplast stroma|GTP binding|hydrolase activity|rRNA binding|brassinosteroid mediated signaling pathway|chloroplast organization|chloroplast rRNA processing|developmental process|positive regulation of carotenoid biosynthetic process|positive regulation of chlorophyll biosynthetic process|regulation of transcription, DNA-templated|response to absence of light|response to brassinoste…
LOC115710216	151.544	60.288	242.8	3.91619	1.96945	0.00204724	0.0168023	Up	4.74687	5.66277	3.5974	1.82336	1.44096	1.25452	0.100648	1.11682	CYP71A9		GeneID:115710216	cytochrome P450 71A9-like	GO:0016021,GO:0016020,GO:0020037,GO:0005506,GO:0016709	integral component of membrane|membrane|heme binding|iron ion binding|oxidoreductase activity,acting on paired donors, with incorporation or reduction of molecular oxygen, NAD(P)H as one donor, and incorporation of one atom of oxygen
LOC115710224	150.521	300.809	0.233489	0.000938643	-10.0571	3.95e-07	1.14e-05	Down	0.039387	0	0	0	0.0901097	27.5894	15.7413	7.8938	GAST1		GeneID:115710224	gibberellin-regulated protein 6-like	GO:0005576	extracellular region
LOC115710227	2391.63	3594.04	1189.22	0.331812	-1.59156	1.56e-10	8.36e-09	Down	40.0343	24.5901	40.9129	30.1563	71.6128	112.955	137.397	91.6228			GeneID:115710227	peptide methionine sulfoxide reductase-like	GO:0008113	peptide-methionine (S)-S-oxide reductase activity
LOC115710234	52.1156	95.3145	8.91681	0.0991904	-3.33366	7.53e-05	0.00111497	Down	0.163383	0.247235	0.158427	0.310279	0.106797	3.70476	3.4662	2.3389	MYB106	At3g01140	GeneID:115710234	transcription factor MYB106-like	GO:0005634,GO:0003677,GO:0000902,GO:0035017,GO:1901957,GO:0010091	nucleus|DNA binding|cell morphogenesis|cuticle pattern formation|regulation of cutin biosynthetic process|trichome branching
LOC115710298	46.3201	8.81015	83.83	8.56803	3.09896	0.000507544	0.0054903	Up	2.486	3.44356	0.769192	0.847383	0.218749	0	0.348027	0.229621	LAMT		GeneID:115710298	LOW QUALITY PROTEIN: probable S-adenosylmethionine-dependent methyltransferase At5g38100
LOC115710301	2159.9	3057.77	1262.03	0.419458	-1.2534	2.21e-09	9.99e-08	Down	49.5545	41.0171	37.7157	45.1757	105.506	143.724	106.063	67.8644			GeneID:115710301	uncharacterized protein LOC115710301	GO:0009507,GO:0015035,GO:0045454,GO:0006662	chloroplast|protein disulfide oxidoreductase activity|cell redox homeostasis|glycerol ether metabolic process
LOC115710312	45.0527	11.769	78.3363	6.45002	2.6893	0.000326097	0.00387063	Up	3.35256	4.32805	2.805	1.12745	0.439427	0.0401677	0.68641	0.583253	HSFB4D	Os03g0366800	GeneID:115710312	heat stress transcription factor B-2a-like	GO:0005634,GO:0003700,GO:0000978,GO:0043565,GO:0034605,GO:0061408	nucleus|DNA-binding transcription factor activity|RNA polymerase II proximal promoter sequence-specific DNA binding|sequence-specific DNA binding|cellular response to heat|positive regulation of transcription from RNA polymerase II promoter in response to heat stress
LOC115710374	24.3781	0.250731	48.5055	123.491	6.94826	0.000107997	0.00151947	Up	0.379842	0.0731546	6.52373	0.196733	0	0	0.0377065	0		Os02g0506500	GeneID:115710374	ubiquitin-like modifier-activating enzyme 5	GO:0005737,GO:0005829,GO:0005524,GO:0046872,GO:0071566,GO:0071569	cytoplasm|cytosol|ATP binding|metal ion binding|UFM1 activating enzyme activity|protein ufmylation
LOC115710414	14.2368	23.4133	5.06043	0.225266	-2.1503	0.000769627	0.00763465	Down	0.0457113	0.058104	0.0310273	0.0607668	0.292819	0.315462	0.129778	0.170651	LECRK1	Os04g0201900	GeneID:115710414	LOW QUALITY PROTEIN: G-type lectin S-receptor-like serine/threonine-protein kinase LECRK1	GO:0016021,GO:0005886,GO:0005524,GO:0030246,GO:0004674,GO:0006952,GO:0006468	integral component of membrane|plasma membrane|ATP binding|carbohydrate binding|protein serine/threonine kinase activity|defense response|protein phosphorylation
LOC115710478	2.88629	0	5.77257	30.3966	4.92584	0.00703649	0.043452	Up	0.156217	0.110316	0.14727	0.222502	0	0	0	0			GeneID:115710478	uncharacterized protein LOC115710478
LOC115710530	34.1382	60.4576	7.8188	0.130285	-2.94025	7.72e-06	0.000156874	Down	0.519259	0.495026	0.0587427	0.640978	2.73232	3.40433	5.15979	2.14258			GeneID:115710530	uncharacterized protein LOC115710530
LOC115710618	93.4288	174.02	12.8379	0.0720463	-3.79493	9.61e-05	0.00137059	Down	0.236322	0.0556279	0.742628	0.39893	0.120146	8.87935	6.19329	4.56602		At2g38420	GeneID:115710618	pentatricopeptide repeat-containing protein At2g38420, mitochondrial-like
LOC115710643	188.411	266.067	110.755	0.400583	-1.31983	0.00526864	0.0349876	Down	3.90753	1.71135	1.76395	1.46274	2.75067	7.4331	3.63094	7.5855	UGT73C6	At2g36790	GeneID:115710643	UDP-glycosyltransferase 73C6-like	GO:0043231,GO:0080043,GO:0080046,GO:0080044,GO:0035251,GO:0008194,GO:0051555	intracellular membrane-bounded organelle|quercetin 3-O-glucosyltransferase activity|quercetin 4'-O-glucosyltransferase activity|quercetin 7-O-glucosyltransferase activity|UDP-glucosyltransferase activity|UDP-glycosyltransferase activity|flavonol biosynthetic process	ko00908	Zeatin biosynthesis
LOC115710707	69.4084	100.465	38.3519	0.381216	-1.39132	0.00424191	0.0296455	Down	0.611298	1.16554	1.41076	0.789417	1.17476	3.88118	3.41766	2.08994			GeneID:115710707	uncharacterized protein LOC115710707
LOC115710758	1726.27	2511.27	941.267	0.376684	-1.40857	9.78e-06	0.000192337	Down	8.6225	9.95948	10.2457	6.56341	11.6677	32.6576	30.2009	21.0687	BOR1	At2g47160	GeneID:115710758	boron transporter 1-like	GO:0005768,GO:0005887,GO:0005773,GO:0015301,GO:0080139,GO:0005452,GO:0046713,GO:0051453,GO:0010036	endosome|integral component of plasma membrane|vacuole|anion:anion antiporter activity|borate efflux transmembrane transporter activity|inorganic anion exchanger activity|borate transport|regulation of intracellular pH|response to boron-containing substance
LOC115710806	6.65034	13.3007	0	0.014179	-6.1401	0.000434856	0.00486395	Down	0	0	0	0	0.404257	0.125071	0.118738	0.881338			GeneID:115710806	uncharacterized protein LOC115710806
LOC115710807	6.13515	12.2703	0	0.0148731	-6.07115	7.96e-05	0.00116604	Down	0	0	0	0	0.476972	0.479597	0.318719	0.901218			GeneID:115710807	uncharacterized protein LOC115699781
LOC115710810	2449.51	3483.83	1415.19	0.407188	-1.29623	1.09e-06	2.77e-05	Down	21.5616	21.4227	26.4599	19.7682	31.8886	76.8957	66.0411	47.2855	NIP3-1	Os10g0513200	GeneID:115710810	probable aquaporin NIP5-1	GO:0016021,GO:0015267	integral component of membrane|channel activity
LOC115710836	8.68598	14.9526	2.41934	0.158062	-2.66144	0.000656894	0.00674995	Down	0.0132926	0.00704016	0.0225565	0.0252439	0.106438	0.0764458	0.11612	0.124062		At1g18910	GeneID:115710836	zinc finger protein BRUTUS-like At1g18910	GO:0016021,GO:0005634,GO:0016874,GO:0008270,GO:0010106,GO:0016567	integral component of membrane|nucleus|ligase activity|zinc ion binding|cellular response to iron ion starvation|protein ubiquitination
LOC115710862	5.6192	11.2384	0	0.0159547	-5.96987	0.000697587	0.00705485	Down	0	0	0	0	0.323424	0.0464577	0.374895	0.218248	SKIP23	At2g17030	GeneID:115710862	F-box protein SKIP23-like	GO:0005634,GO:0016567	nucleus|protein ubiquitination
LOC115710909	10.9437	21.6236	0.263894	0.0137812	-6.18116	3.08e-05	0.000514173	Down	0	0	0.00997412	0	0.0403416	0.395496	0.231059	0.155912			GeneID:115710909	putative leucine-rich repeat-containing protein DDB_G0290503
LOC115710913	294.805	403.532	186.077	0.453587	-1.14055	0.00286091	0.0217686	Down	2.75518	3.47969	1.34532	1.69939	5.56254	4.71288	7.61136	2.3829	NPF73	At1g32450	GeneID:115710913	protein NRT1/ PTR FAMILY 7.3-like	GO:0016021,GO:0005886,GO:0015112,GO:0015386,GO:0015293,GO:0010150,GO:0015706,GO:0055075,GO:1902600,GO:0010167	integral component of membrane|plasma membrane|nitrate transmembrane transporter activity|potassium:proton antiporter activity|symporter activity|leaf senescence|nitrate transport|potassium ion homeostasis|proton transmembrane transport|response to nitrate
LOC115710946	77.3307	124.426	30.2352	0.240206	-2.05766	8.43e-10	4.05e-08	Down	2.84394	2.39628	1.38929	1.65709	11.9777	6.31916	7.83425	7.93746			GeneID:115710946	uncharacterized protein LOC115710946
LOC115710978	118.696	73.8369	163.556	2.21621	1.14809	0.00190273	0.0158327	Up	3.87938	3.91621	5.53737	4.72198	2.91871	1.55723	1.2225	2.42998		At5g06940	GeneID:115710978	probably inactive leucine-rich repeat receptor-like protein kinase At5g06940, partial
LOC115710981	11.2563	22.2487	0.263894	0.0132805	-6.23455	6.62e-07	1.79e-05	Down	0	0	0.0311815	0	0.536001	0.824277	0.692248	0.568656	HDA8	At1g08460	GeneID:115710981	histone deacetylase 8-like	GO:0005634,GO:0046872,GO:0032041	nucleus|metal ion binding|NAD-dependent histone deacetylase activity (H3-K14 specific)
LOC115711010	125.301	46.8575	203.744	4.56371	2.19021	0.00810683	0.0483065	Up	3.04034	3.2205	4.34894	2.04028	1.7222	0.0672497	0.159612	0.904694		At1g56130	GeneID:115711010	probable LRR receptor-like serine/threonine-protein kinase At1g56140, partial
LOC115711014	187.356	269.324	105.388	0.393981	-1.3438	2.15e-05	0.00037888	Down	1.60585	1.06475	1.31743	1.4899	2.01922	4.31446	4.72513	3.1071	DTX48	At1g58340	GeneID:115711014	protein DETOXIFICATION 48	GO:0005794,GO:0000139,GO:0017119,GO:0016021,GO:0005770,GO:0031902,GO:0043226,GO:0015297,GO:0015238,GO:0005381,GO:0006855,GO:0015893,GO:0055072,GO:0006826,GO:1905428,GO:0009737,GO:0009646,GO:0009408,GO:0009624,GO:0006970,GO:0010015	Golgi apparatus|Golgi membrane|Golgi transport complex|integral component of membrane|late endosome|late endosome membrane|organelle|antiporter activity|drug transmembrane transporter activity|iron ion transmembrane transporter activity|drug transmembrane transport|drug transport|iron ion homeostasis|iron ion transport|regulation of plant organ formation|response to abscisic acid|response to abse…
LOC115711057	1665.63	2561.06	770.207	0.349566	-1.51636	0.00490252	0.0330477	Down	14.7789	18.0335	14.793	11.5395	36.3386	14.9779	22.684	122.969	CPK32	At3g57530	GeneID:115711057	calcium-dependent protein kinase 32-like, partial	GO:0005737,GO:0005634,GO:0005886,GO:0009506,GO:0005524,GO:0005509,GO:0004698,GO:0009931,GO:0004683,GO:0009738,GO:0035556,GO:0018105,GO:0009737,GO:0009651	cytoplasm|nucleus|plasma membrane|plasmodesma|ATP binding|calcium ion binding|calcium-dependent protein kinase C activity|calcium-dependent protein serine/threonine kinase activity|calmodulin-dependent protein kinase activity|abscisic acid-activated signaling pathway|intracellular signal transduction|peptidyl-serine phosphorylation|response to abscisic acid|response to salt stress	ko04626	Plant-pathogen interaction
LOC115711104	13.9904	27.9807	0	0.00655238	-7.25377	0.000751072	0.00748538	Down	0	0	0	0	0	0.508092	0.110707	0.256121	RGA1		GeneID:115711104	putative disease resistance protein RGA1	GO:0043531,GO:0005524,GO:0006952	ADP binding|ATP binding|defense response
LOC115711106	32.4789	64.9579	0	0.00287249	-8.44348	0.00768557	0.0463572	Down	0	0	0	0	0	1.92592	0.672851	1.15809	RGA1		GeneID:115711106	putative disease resistance protein RGA1	GO:0043531,GO:0005524,GO:0006952	ADP binding|ATP binding|defense response
LOC115711107	43.2625	86.5249	0	0.00217148	-8.84711	0.00544008	0.0358165	Down	0	0	0	0	0	3.08382	1.65645	1.85421	RGA2		GeneID:115711107	putative disease resistance protein RGA1	GO:0043531,GO:0005524,GO:0006952	ADP binding|ATP binding|defense response
LOC115711110	17.5325	34.586	0.479014	0.0134959	-6.21134	0.000416829	0.00469513	Down	0	0.00758563	0	0.00679995	0	0.683661	0.140757	0.246242	RGA1		GeneID:115711110	putative disease resistance protein RGA1	GO:0043531,GO:0005524,GO:0006952	ADP binding|ATP binding|defense response
LOC115711111	41.8264	81.9392	1.71346	0.0200942	-5.63707	1.07e-06	2.71e-05	Down	0.0933618	0.148341	0.0528091	0.0443256	0.213593	11.7586	2.75257	1.83443	NUP93A	At2g41620	GeneID:115711111	nuclear pore complex protein NUP93A-like	GO:0005635,GO:0005643,GO:0005730,GO:0009506,GO:0017056,GO:0051292,GO:0016973,GO:0006606	nuclear envelope|nuclear pore|nucleolus|plasmodesma|structural constituent of nuclear pore|nuclear pore complex assembly|poly(A)+ mRNA export from nucleus|protein import into nucleus	ko03013	RNA transport
LOC115711113	104.995	207.865	2.12554	0.00766542	-7.02742	0.000218946	0.002781	Down	0.120784	0	0.01952	0.0163842	0	7.20425	4.35239	3.94974	TDS4	KLLA0A05434g	GeneID:115711113	uncharacterized protein LOC115711113	GO:0000126,GO:0003677,GO:0046872,GO:0000994,GO:0000995,GO:0017025,GO:0001156,GO:0001112,GO:0090074,GO:0006355,GO:0070898,GO:0070893	transcription factor TFIIIB complex|DNA binding|metal ion binding|RNA polymerase III core binding|RNA polymerase III general transcription initiation factor activity|TBP-class protein binding|TFIIIC-class transcription factor complex binding|DNA-templated transcriptional open complex formation|negative regulation of protein homodimerization activity|regulation of transcription, DNA-templated|RNA …
LOC115711114	40.8945	80.5062	1.2828	0.0138945	-6.16934	3.58e-07	1.04e-05	Down	0	0	0.0581978	0.0122121	0.0588472	1.6272	1.26394	1.51622			GeneID:115711114	uncharacterized protein LOC115711114
LOC115711117	162.578	319.355	5.80197	0.018879	-5.72708	2.45e-08	9.36e-07	Down	0.0224932	0.0357391	0.0699766	0.0106791	0.02573	3.94541	1.75001	2.03854			GeneID:115711117	LOW QUALITY PROTEIN: uncharacterized protein LOC115711117	GO:0005829,GO:0030544,GO:0051085	cytosol|Hsp70 protein binding|chaperone cofactor-dependent protein refolding
LOC115711143	13.3056	26.6112	0	0.00735552	-7.08696	8.12e-06	0.000164376	Down	0	0	0	0	0.0640134	1.28731	0.702726	1.15453	PTST	At5g03420	GeneID:115711143	protein PTST homolog 3, chloroplastic-like	GO:0009507,GO:0010581,GO:0019252	chloroplast|regulation of starch biosynthetic process|starch biosynthetic process
LOC115711187	263.814	358.15	169.478	0.472899	-1.08039	0.000626267	0.00648031	Down	6.31637	6.6065	9.88695	5.77134	11.2242	23.2117	12.4497	13.9719	RLK902	At3g17840	GeneID:115711187	probable inactive receptor kinase RLK902
LOC115711191	6.97222	1.835	12.1094	6.82357	2.77053	0.00280345	0.0214332	Up	0.924282	0.783241	1.11533	0.351059	0.211457	0.0708737	0.13457	0.0605363	ZAT18	At3g53600	GeneID:115711191	zinc finger protein ZAT11-like
LOC115711192	148.451	265.31	31.5926	0.109496	-3.19105	0.000718027	0.00720665	Down	1.50426	0.663914	0.822504	0.380895	0.602252	17.7921	0.903422	9.3596	GAMMACAL1	At5g63510	GeneID:115711192	gamma carbonic anhydrase-like 2, mitochondrial	GO:0031966,GO:0046872	mitochondrial membrane|metal ion binding
LOC115711195	15.3099	26.3712	4.24859	0.153935	-2.69961	0.000836538	0.00815618	Down	0.0185475	0.0982326	0.146876	0.0704465	0.254598	0.810663	0.72911	0.309768		At3g18200	GeneID:115711195	WAT1-related protein At3g18200	GO:0016021,GO:0005886,GO:0022857	integral component of membrane|plasma membrane|transmembrane transporter activity
LOC115711207	53.8001	104.553	3.04696	0.0288701	-5.11428	0.000412228	0.00466245	Down	0.279771	0	0.0351666	0.0885518	0	3.71849	6.17786	4.15339			GeneID:115711207	uncharacterized protein LOC115711207
LOC115711224	7.2456	14.4912	0	0.0123789	-6.33598	2.69e-05	0.000460063	Down	0	0	0	0	0.466879	0.176043	0.501389	0.426038	KAN2	At1g32240	GeneID:115711224	uncharacterized protein LOC115711224	GO:0005634,GO:0003700,GO:0044212,GO:0048440,GO:0030154,GO:0048481,GO:0009944,GO:0006355	nucleus|DNA-binding transcription factor activity|transcription regulatory region DNA binding|carpel development|cell differentiation|plant ovule development|polarity specification of adaxial/abaxial axis|regulation of transcription, DNA-templated
LOC115711233	57.1878	96.3721	18.0035	0.169819	-2.55793	0.000327527	0.00388522	Down	0.110179	0.389027	0.37393	0.5231	0.483131	4.01305	1.98513	1.1546	XTH32	At2g36870	GeneID:115711233	probable xyloglucan endotransglucosylase/hydrolase protein 32	GO:0048046,GO:0005618,GO:0004553,GO:0016762,GO:0042546,GO:0016998,GO:0071555,GO:0010411	apoplast|cell wall|hydrolase activity, hydrolyzing O-glycosyl compounds|xyloglucan:xyloglucosyl transferase activity|cell wall biogenesis|cell wall macromolecule catabolic process|cell wall organization|xyloglucan metabolic process
LOC115711238	2.97643	5.95285	0	0.0320961	-4.96146	0.00844215	0.0497947	Down	0	0	0	0	0.0794953	0.279765	0.151771	0.375507	TL1		GeneID:115711238	thaumatin-like protein 1	GO:0005576	extracellular region
LOC115711257	37.1786	73.8662	0.491117	0.00635571	-7.29773	5.4e-06	0.000115071	Down	0	0	0.0182058	0.0152811	0	2.40633	1.38827	1.34389	ZOG1		GeneID:115711257	zeatin O-glucosyltransferase-like	GO:0050403,GO:0050404,GO:0009690,GO:0048439,GO:0009965,GO:0045926,GO:0006486,GO:0010380,GO:0010083,GO:0010015,GO:0048316	trans-zeatin O-beta-D-glucosyltransferase activity|zeatin O-beta-D-xylosyltransferase activity|cytokinin metabolic process|flower morphogenesis|leaf morphogenesis|negative regulation of growth|protein glycosylation|regulation of chlorophyll biosynthetic process|regulation of vegetative meristem growth|root morphogenesis|seed development	ko00908	Zeatin biosynthesis
LOC115711262	156.465	79.624	233.307	2.8805	1.52632	0.000716041	0.00719224	Up	4.10884	3.79839	3.01432	1.41874	0.897294	0.63013	1.0061	1.68806	PAL		GeneID:115711262	phenylalanine ammonia-lyase-like	GO:0005737,GO:0045548,GO:0009800,GO:0006559	cytoplasm|phenylalanine ammonia-lyase activity|cinnamic acid biosynthetic process|L-phenylalanine catabolic process	ko00360,ko00940	Phenylalanine metabolism|Phenylpropanoid biosynthesis
LOC115711281	73.5604	146.396	0.724606	0.00505913	-7.6269	4.07e-07	1.17e-05	Down	0.00977042	0	0.0110531	0.00927745	0	3.1129	1.64301	1.43022	PCMP-H63	At4g32450	GeneID:115711281	pentatricopeptide repeat-containing protein At4g32450, mitochondrial-like
LOC115711284	925.361	1393.72	457.002	0.330546	-1.59708	3.85e-07	1.11e-05	Down	9.47834	7.86771	6.21913	9.78557	14.1147	29.9903	38.0878	20.9432	KING1	At3g48530	GeneID:115711284	SNF1-related protein kinase regulatory subunit gamma-1-like	GO:0009505,GO:0005524,GO:0019887,GO:0005975,GO:0006633,GO:0042128	plant-type cell wall|ATP binding|protein kinase regulator activity|carbohydrate metabolic process|fatty acid biosynthetic process|nitrate assimilation
LOC115711288	101.504	202.505	0.503579	0.00238719	-8.71047	2.84e-05	0.000479989	Down	0	0.0272716	0	0	0.0147254	6.70734	1.96795	2.57996			GeneID:115711288	L-galactono-1,4-lactone dehydrogenase, mitochondrial-like	GO:0016021,GO:0031966,GO:0003885,GO:0071949,GO:0016633,GO:0019853	integral component of membrane|mitochondrial membrane|D-arabinono-1,4-lactone oxidase activity|FAD binding|galactonolactone dehydrogenase activity|L-ascorbic acid biosynthetic process	ko00053	Ascorbate and aldarate metabolism
LOC115711293	1310.79	795.944	1825.63	2.3196	1.21388	0.00161839	0.0139777	Up	31.3819	40.1762	55.57	36.416	28.0709	7.7729	19.1863	16.017		At4g28100	GeneID:115711293	uncharacterized GPI-anchored protein At4g28100-like	GO:0031225,GO:0046658	anchored component of membrane|anchored component of plasma membrane
LOC115711324	90.0602	125.888	54.2323	0.422822	-1.24188	0.00844719	0.0498091	Down	2.00868	1.75767	3.45796	2.81953	2.79723	9.59307	7.39077	3.86098	PRE3	At1g74500	GeneID:115711324	transcription factor ILI6-like	GO:0005737,GO:0005634,GO:0003700,GO:0046983,GO:0009742,GO:0010086,GO:0009740,GO:0040008	cytoplasm|nucleus|DNA-binding transcription factor activity|protein dimerization activity|brassinosteroid mediated signaling pathway|embryonic root morphogenesis|gibberellic acid mediated signaling pathway|regulation of growth
LOC115711346	167.896	333.611	2.18037	0.0064862	-7.26841	5.51e-11	3.2e-09	Down	0.0289895	0.0767683	0	0.0275268	0.132645	11.3202	4.98571	4.4714	NTRC	At2g41680	GeneID:115711346	LOW QUALITY PROTEIN: NADPH-dependent thioredoxin reductase 3-like	GO:0009507,GO:0009570,GO:0008047,GO:0042802,GO:0016671,GO:0004791,GO:0045454,GO:0042744,GO:0043085,GO:0010380,GO:0010581,GO:0019430	chloroplast|chloroplast stroma|enzyme activator activity|identical protein binding|oxidoreductase activity, acting on a sulfur group of donors, disulfide as acceptor|thioredoxin-disulfide reductase activity|cell redox homeostasis|hydrogen peroxide catabolic process|positive regulation of catalytic activity|regulation of chlorophyll biosynthetic process|regulation of starch biosynthetic process|re…	ko00450	Selenocompound metabolism
LOC115711347	44.1086	83.7897	4.4276	0.0533697	-4.22783	1.84e-11	1.14e-09	Down	0.271088	0.123065	0.262865	0.0735458	2.87948	3.0735	2.11441	5.74503			GeneID:115711347	uncharacterized protein LOC115711347
LOC115711358	266.974	159.969	373.98	2.34386	1.22889	0.00323991	0.0238309	Up	5.34509	4.06812	7.33079	4.22323	3.33642	1.38138	1.23938	2.95622	LRK10		GeneID:115711358	rust resistance kinase Lr10-like	GO:0016021,GO:0005886,GO:0005524,GO:0004674	integral component of membrane|plasma membrane|ATP binding|protein serine/threonine kinase activity
LOC115711363	209.698	414.409	4.98716	0.0122315	-6.35326	3.34e-10	1.71e-08	Down	0.119962	0.072612	0.0387746	0.130182	0.098018	16.0846	9.43156	5.13511			GeneID:115711363	ganglioside-induced differentiation-associated protein 2-like
LOC115711370	68.9377	132.684	5.19165	0.0162561	-5.94287	7.46e-09	3.13e-07	Down	0.231884	0.0387829	0	0	1.07497	2.73731	1.37265	1.75054	PAP27	At5g50400	GeneID:115711370	probable inactive purple acid phosphatase 27	GO:0005576,GO:0003993,GO:0046872	extracellular region|acid phosphatase activity|metal ion binding
LOC115711390	25.6568	50.8529	0.460713	0.00975188	-6.6801	4.79e-05	0.000745443	Down	0.0227096	0	0	0.0215638	0	2.19413	1.41348	1.38326			GeneID:115711390	uncharacterized protein LOC115710110
LOC115711395	1832.83	2531.28	1134.37	0.445725	-1.16577	1.03e-05	0.000199552	Down	19.5946	11.612	13.3134	25.8423	31.2324	41.7713	47.0498	38.5295	NFYA9	At3g20910	GeneID:115711395	nuclear transcription factor Y subunit A-1-like isoform X1	GO:0016602,GO:0003677,GO:0003700,GO:0009793,GO:0055046,GO:0045892,GO:0009555,GO:0048316,GO:0010262	CCAAT-binding factor complex|DNA binding|DNA-binding transcription factor activity|embryo development ending in seed dormancy|microgametogenesis|negative regulation of transcription, DNA-templated|pollen development|seed development|somatic embryogenesis
LOC115711419	73.0615	144.109	2.0136	0.0121326	-6.36497	2.53e-05	0.000437376	Down	0	0.0299099	0.0638872	0.026812	0.01615	6.02463	0.04625	2.69085		At5g63520	GeneID:115711419	F-box/LRR-repeat protein At5g63520-like isoform X1
LOC115711462	42.2736	67.8784	16.6688	0.230492	-2.11721	7.55e-05	0.00111698	Down	1.15244	0.406911	0.553099	0.364765	1.55797	4.33812	2.17363	2.09285			GeneID:115711462	uncharacterized protein LOC115711462
LOC115711469	427.031	853.122	0.939726	0.00112234	-9.79928	6.86e-07	1.84e-05	Down	0.0181469	0.0192222	0	0.0344626	0	36.4434	13.7521	16.7228		At4g28100	GeneID:115711469	uncharacterized GPI-anchored protein At4g28100-like	GO:0031225,GO:0046658	anchored component of membrane|anchored component of plasma membrane
LOC115711472	84.3748	154.431	14.3186	0.0909641	-3.45856	1.13e-10	6.27e-09	Down	0.169489	0.197486	0.421827	0.241406	1.14389	4.3473	3.79404	1.98149	BHLH72	At5g61270	GeneID:115711472	transcription factor PIF7-like isoform X1	GO:0016607,GO:0005634,GO:0003700,GO:0003690,GO:0046983,GO:0009704,GO:0009585,GO:0006355,GO:0009416	nuclear speck|nucleus|DNA-binding transcription factor activity|double-stranded DNA binding|protein dimerization activity|de-etiolation|red, far-red light phototransduction|regulation of transcription, DNA-templated|response to light stimulus
LOC115711473	114.317	205.67	22.9648	0.113915	-3.13397	0.000391348	0.00448171	Down	0.25834	0.501688	0.503327	0.13628	0.19701	4.72125	6.56657	1.31131	RAD1		GeneID:115711473	GRAS family protein RAM1-like
LOC115711475	54.5813	23.5203	85.6423	3.86235	1.94948	0.00352921	0.0255671	Up	1.01688	1.56316	1.02411	0.894917	0.695086	0.0998445	0.094789	0.328943	fluG		GeneID:115711475	protein fluG-like	GO:0005737,GO:0016787,GO:0008134,GO:0001896,GO:0048315,GO:0006598,GO:0075307,GO:0010914,GO:1900376,GO:0010913,GO:0000905,GO:0030435,GO:0045461	cytoplasm|hydrolase activity|transcription factor binding|autolysis|conidium formation|polyamine catabolic process|positive regulation of conidium formation|positive regulation of sterigmatocystin biosynthetic process|regulation of secondary metabolite biosynthetic process|regulation of sterigmatocystin biosynthetic process|sporocarp development involved in asexual reproduction|sporulation result…
LOC115711483	183.957	80.2733	287.64	3.61141	1.85256	2.51e-06	5.79e-05	Up	3.23062	5.39073	3.64062	2.93733	1.6694	0.702999	0.640162	1.21318	PAP27	At5g50400	GeneID:115711483	probable inactive purple acid phosphatase 27	GO:0005576,GO:0003993,GO:0046872	extracellular region|acid phosphatase activity|metal ion binding
LOC115711487	43.1331	62.8617	23.4044	0.366197	-1.44931	0.000239983	0.0029976	Down	0.312193	0.250525	0.22475	0.152712	0.530267	0.511423	0.857421	0.641301	RLP41	At3g25010	GeneID:115711487	receptor-like protein 6	GO:0016021,GO:0005886,GO:0071215,GO:0010150	integral component of membrane|plasma membrane|cellular response to abscisic acid stimulus|leaf senescence
LOC115711492	154.317	304.236	4.39771	0.014062	-6.15205	4.05e-12	2.73e-10	Down	0.0872513	0.0369686	0	0.198837	0.858339	11.3402	4.32547	6.36031	PEX3-2	At1g48635	GeneID:115711492	peroxisome biogenesis protein 3-2-like	GO:0005779,GO:0007031,GO:0015031	integral component of peroxisomal membrane|peroxisome organization|protein transport	ko04146	Peroxisome
LOC115711515	68.006	132.971	3.04112	0.0177707	-5.81436	1.45e-09	6.77e-08	Down	0.149319	0.0158167	0	0.0283569	0.563659	3.9845	2.60879	1.40828	ARP	At2g41460	GeneID:115711515	DNA-(apurinic or apyrimidinic site) lyase, chloroplastic-like isoform X1	GO:0042644,GO:0005634,GO:0008408,GO:0140078,GO:0003677,GO:0003906,GO:0008311,GO:0004519,GO:0046872,GO:0016791,GO:0004528,GO:0006284,GO:0033683,GO:0045893	chloroplast nucleoid|nucleus|3'-5' exonuclease activity|class I DNA-(apurinic or apyrimidinic site) endonuclease activity|DNA binding|DNA-(apurinic or apyrimidinic site) endonuclease activity|double-stranded DNA 3'-5' exodeoxyribonuclease activity|endonuclease activity|metal ion binding|phosphatase activity|phosphodiesterase I activity|base-excision repair|nucleotide-excision repair, DNA incision…	ko03410	Base excision repair
LOC115711528	42.1875	80.8682	3.50676	0.0407031	-4.61872	3.21e-05	0.000533495	Down	0.0694949	0	0.039309	0.148474	0.0794953	3.31721	1.30902	1.36548	gpt2		GeneID:115711528	UDP-N-acetylglucosamine--dolichyl-phosphate N-acetylglucosaminephosphotransferase-like	GO:0005783,GO:0030176,GO:0016021,GO:0008963,GO:0016757,GO:0003975,GO:0006489,GO:0006491,GO:0006487	endoplasmic reticulum|integral component of endoplasmic reticulum membrane|integral component of membrane|phospho-N-acetylmuramoyl-pentapeptide-transferase activity|transferase activity, transferring glycosyl groups|UDP-N-acetylglucosamine-dolichyl-phosphate N-acetylglucosaminephosphotransferase activity|dolichyl diphosphate biosynthetic process|N-glycan processing|protein N-linked glycosylation	ko00510	N-Glycan biosynthesis
LOC115711539	270.641	88.6416	452.64	4.63416	2.21231	1.8e-07	5.7e-06	Up	3.47485	3.27841	10.6949	9.53789	1.51271	1.42395	0.952438	1.40975		At5g07800	GeneID:115711539	flavin-containing monooxygenase FMO GS-OX-like 9	GO:0050660,GO:0004497,GO:0004499,GO:0050661	flavin adenine dinucleotide binding|monooxygenase activity|N,N-dimethylaniline monooxygenase activity|NADP binding
LOC115711542	351.418	667.21	35.6256	0.0531695	-4.23326	2.96e-17	3.43e-15	Down	0.546833	0.12715	0.905299	0.443256	9.47439	9.37313	5.86924	13.1162			GeneID:115711542	polygalacturonase-like isoform X1	GO:0005618,GO:0005576,GO:0004650,GO:0005975,GO:0071555,GO:0009835	cell wall|extracellular region|polygalacturonase activity|carbohydrate metabolic process|cell wall organization|fruit ripening	ko00040	Pentose and glucuronate interconversions
LOC115711565	132.395	211.712	53.0786	0.250374	-1.99784	0.000445028	0.00495509	Down	1.00773	0.600441	0.765957	1.16621	1.04468	7.38922	2.92295	3.00103	PRFB3	At3g57190	GeneID:115711565	peptide chain release factor PrfB3, chloroplastic-like	GO:0009507,GO:0009570,GO:0003730,GO:0043565,GO:0003747,GO:0009658,GO:0040008,GO:0043488	chloroplast|chloroplast stroma|mRNA 3'-UTR binding|sequence-specific DNA binding|translation release factor activity|chloroplast organization|regulation of growth|regulation of mRNA stability
LOC115711570	4.18836	8.37671	0	0.0228377	-5.45244	0.00236626	0.0187863	Down	0	0	0	0	0.693845	0.398665	0.0946197	0.340517			GeneID:115711570	uncharacterized protein LOC115711570
LOC115711573	123.093	4.78662	241.4	53.0618	5.7296	8.7e-13	6.3e-11	Up	4.74008	4.48223	5.9147	5.67927	0.0232712	0.0233993	0.355431	0.0199863	EXO1	At1g29630	GeneID:115711573	exonuclease 1-like isoform X2	GO:0005634,GO:0017108,GO:0003677,GO:0051908,GO:0048256,GO:0046872,GO:0045145,GO:0006281	nucleus|5'-flap endonuclease activity|DNA binding|double-stranded DNA 5'-3' exodeoxyribonuclease activity|flap endonuclease activity|metal ion binding|single-stranded DNA 5'-3' exodeoxyribonuclease activity|DNA repair	ko03430	Mismatch repair
LOC115711578	16.1651	29.4921	2.83804	0.0826731	-3.59644	0.000776041	0.00768637	Down	0.198237	0.026248	0.0280327	0.0470588	0.793674	0.199511	1.83997	0.292132			GeneID:115711578	uncharacterized protein LOC115707110 isoform X1
LOC115711587	2270.82	1454.21	3087.42	2.14627	1.10183	0.000731759	0.00732331	Up	61.5436	68.9377	53.2423	43.306	44.7314	13.3038	22.9312	25.4184	ADPG2	At2g41850	GeneID:115711587	uncharacterized protein LOC115711587	GO:0005618,GO:0005576,GO:0004650,GO:0009901,GO:0009830,GO:0010227,GO:0010047,GO:0045490	cell wall|extracellular region|polygalacturonase activity|anther dehiscence|cell wall modification involved in abscission|floral organ abscission|fruit dehiscence|pectin catabolic process
LOC115711594	67.2428	88.5119	45.9737	0.495944	-1.01175	0.00716001	0.0439946	Down	2.43609	1.93533	1.7427	0.88445	2.78665	3.95574	4.53783	2.28771			GeneID:115711594	uncharacterized protein LOC115711594
LOC115711605	340.237	193.275	487.198	2.51928	1.33301	0.00425875	0.0297092	Up	6.49036	11.4643	11.8786	5.29169	4.64507	1.25071	3.65492	4.35661	ZOG1		GeneID:115711605	zeatin O-glucosyltransferase-like	GO:0050403,GO:0050404,GO:0009690,GO:0048439,GO:0009965,GO:0045926,GO:0006486,GO:0010380,GO:0010083,GO:0010015,GO:0048316	trans-zeatin O-beta-D-glucosyltransferase activity|zeatin O-beta-D-xylosyltransferase activity|cytokinin metabolic process|flower morphogenesis|leaf morphogenesis|negative regulation of growth|protein glycosylation|regulation of chlorophyll biosynthetic process|regulation of vegetative meristem growth|root morphogenesis|seed development	ko00908	Zeatin biosynthesis
LOC115711631	163.846	243.774	83.9177	0.33663	-1.57077	2.13e-06	5.05e-05	Down	0.782308	0.656026	1.15543	1.26901	2.34907	4.13662	2.27799	2.55121	TAR2	At4g24670	GeneID:115711631	tryptophan aminotransferase-related protein 2	GO:0005789,GO:0016021,GO:0016846,GO:0050362,GO:0080097,GO:0009851,GO:0043562,GO:0042742,GO:0009908,GO:0048467,GO:0048527,GO:0010078,GO:0010087,GO:0009958,GO:0009723,GO:0048367	endoplasmic reticulum membrane|integral component of membrane|carbon-sulfur lyase activity|L-tryptophan:2-oxoglutarate aminotransferase activity|L-tryptophan:pyruvate aminotransferase activity|auxin biosynthetic process|cellular response to nitrogen levels|defense response to bacterium|flower development|gynoecium development|lateral root development|maintenance of root meristem identity|phloem o…	ko00380	Tryptophan metabolism
LOC115711658	123.749	184.792	62.7068	0.33343	-1.58455	0.000222948	0.00281878	Down	0.389526	1.16141	1.51784	0.767141	1.83182	3.56766	3.21372	2.80634	UGT73C3	At2g36780	GeneID:115711658	UDP-glycosyltransferase 73C3-like	GO:0043231,GO:0080043,GO:0080044,GO:0008194	intracellular membrane-bounded organelle|quercetin 3-O-glucosyltransferase activity|quercetin 7-O-glucosyltransferase activity|UDP-glycosyltransferase activity	ko00908	Zeatin biosynthesis
LOC115711671	121.962	241.604	2.32043	0.00989458	-6.65915	8.33e-09	3.47e-07	Down	0.0106036	0.0224639	0.0719739	0	0.0606475	5.15901	3.24204	2.61475	gpi1		GeneID:115711671	uncharacterized protein LOC115711671	GO:0005783,GO:0000506,GO:0016021,GO:0017176,GO:0006506	endoplasmic reticulum|glycosylphosphatidylinositol-N-acetylglucosaminyltransferase (GPI-GnT) complex|integral component of membrane|phosphatidylinositol N-acetylglucosaminyltransferase activity|GPI anchor biosynthetic process	ko00563	Glycosylphosphatidylinositol (GPI)-anchor biosynthesis
LOC115711684	100.665	152.296	49.0328	0.333192	-1.58558	0.00300227	0.0224703	Down	0.532649	0.336357	0.718454	0.544679	0.38667	2.43882	2.24822	1.65038	PGR3	At4g31850	GeneID:115711684	pentatricopeptide repeat-containing protein At4g31850, chloroplastic-like isoform X1
LOC115711687	449.866	742.321	157.412	0.276438	-1.85497	0.000118277	0.00163571	Down	3.31761	1.97674	2.53764	4.72533	5.36909	7.26323	8.08931	39.0009	MYB29	At5g07690	GeneID:115711687	myb-related protein 330-like	GO:0005634,GO:0003700,GO:0043565,GO:0044212,GO:0030154,GO:0010438,GO:0050832,GO:0009819,GO:0009755,GO:0009682,GO:0009867,GO:0031930,GO:0010105,GO:0010439,GO:2000070,GO:1905255,GO:0006355,GO:0009617,GO:0009739,GO:0009644,GO:0009625,GO:0009753,GO:0009751,GO:0009414,GO:0009611	nucleus|DNA-binding transcription factor activity|sequence-specific DNA binding|transcription regulatory region DNA binding|cell differentiation|cellular response to sulfur starvation|defense response to fungus|drought recovery|hormone-mediated signaling pathway|induced systemic resistance|jasmonic acid mediated signaling pathway|mitochondria-nucleus signaling pathway|negative regulation of ethyl…
LOC115711709	309.772	192.746	426.798	2.21012	1.14413	3.88e-05	0.000629257	Up	11.6078	10.0203	10.4071	7.27252	4.44259	2.94475	4.47778	5.92574	AHL29	At1g76500	GeneID:115711709	AT-hook motif nuclear-localized protein 27-like	GO:0005634,GO:0003680,GO:0003700,GO:0043621,GO:0009908,GO:0009640,GO:0010228	nucleus|AT DNA binding|DNA-binding transcription factor activity|protein self-association|flower development|photomorphogenesis|vegetative to reproductive phase transition of meristem
LOC115711974	20.1623	3.92362	36.4011	9.83855	3.29845	5.49e-05	0.000849189	Up	0.408773	0.591761	0.662826	0.439901	0.0623462	0	0.0297576	0.133864	RPA1B	At5g08020	GeneID:115711974	replication protein A 70 kDa DNA-binding subunit D-like isoform X2	GO:0005662,GO:0000784,GO:0003684,GO:0046872,GO:0043565,GO:0003697,GO:0043047,GO:0006281,GO:0006268,GO:0006261,GO:0000724,GO:0051321,GO:0006289,GO:0010224,GO:0000723,GO:0007004	DNA replication factor A complex|nuclear chromosome, telomeric region|damaged DNA binding|metal ion binding|sequence-specific DNA binding|single-stranded DNA binding|single-stranded telomeric DNA binding|DNA repair|DNA unwinding involved in DNA replication|DNA-dependent DNA replication|double-strand break repair via homologous recombination|meiotic cell cycle|nucleotide-excision repair|response t…
LOC115711983	169.368	110.24	228.495	2.09801	1.06902	8.61e-06	0.0001731	Up	5.38979	5.37889	4.25807	6.51362	1.78338	2.45923	3.33183	2.932	GIS3	At1g68360	GeneID:115711983	zinc finger protein GIS3	GO:0005634,GO:0003700,GO:0046872,GO:0043565,GO:0044212,GO:0009736,GO:0009740,GO:0019760,GO:0007275,GO:0006355,GO:0010026,GO:0010090	nucleus|DNA-binding transcription factor activity|metal ion binding|sequence-specific DNA binding|transcription regulatory region DNA binding|cytokinin-activated signaling pathway|gibberellic acid mediated signaling pathway|glucosinolate metabolic process|multicellular organism development|regulation of transcription, DNA-templated|trichome differentiation|trichome morphogenesis
LOC115711999	48.8777	89.8029	7.95252	0.0876531	-3.51205	5.36e-13	4.06e-11	Down	0.167882	0.237106	0.189921	0.345391	2.52853	3.47575	1.61932	3.07874	HAT	At3g42170	GeneID:115711999	zinc finger BED domain-containing protein RICESLEEPER 4-like	GO:0005829,GO:0005634,GO:0003677,GO:0046872,GO:0046983,GO:0009791	cytosol|nucleus|DNA binding|metal ion binding|protein dimerization activity|post-embryonic development
LOC115712028	99.8055	52.0047	147.606	2.94573	1.55863	9.13e-07	2.36e-05	Up	2.05396	2.41363	3.23126	2.34648	0.513959	0.627528	1.31416	1.11929	OBL1		GeneID:115712028	uncharacterized protein LOC115712028	GO:0004806,GO:0016042	triglyceride lipase activity|lipid catabolic process
LOC115712047	106.34	189.634	23.0464	0.120752	-3.04988	2.27e-14	1.96e-12	Down	0.441728	0.38283	0.545146	0.591029	3.2155	3.27939	6.92827	2.87997	EXL3	At1g75900	GeneID:115712047	GDSL esterase/lipase EXL3-like	GO:0005576,GO:0016298,GO:0016042	extracellular region|lipase activity|lipid catabolic process
LOC115712063	217.514	295.351	139.677	0.440457	-1.18293	0.000713191	0.00717111	Down	1.48606	1.28791	3.61064	3.60786	2.93619	6.62337	6.71212	5.12642	UGT74B1	At1g24100	GeneID:115712063	UDP-glycosyltransferase 74B1-like	GO:0043231,GO:0080043,GO:0080044,GO:0047251,GO:0102659,GO:0103100,GO:0103103,GO:0103099,GO:0103101,GO:0103102,GO:0008194,GO:0052544,GO:0042742,GO:0019761	intracellular membrane-bounded organelle|quercetin 3-O-glucosyltransferase activity|quercetin 7-O-glucosyltransferase activity|thiohydroximate beta-D-glucosyltransferase activity|UDP-glucose: 4-methylthiobutylhydroximate S-glucosyltransferase activity|UDP-glucose: 6-methylthiohexylhydroximate S-glucosyltransferase activity|UDP-glucose: 9-methylthiononylhydroximate S-glucosyltransferase activity|U…	ko00380,ko00966	Tryptophan metabolism|Glucosinolate biosynthesis
LOC115712066	722.536	1073.46	371.615	0.345317	-1.53401	7.33e-09	3.08e-07	Down	16.737	19.1047	19.3298	23.4355	33.376	84.0716	51.3913	60.9617			GeneID:115712066	basic blue protein-like	GO:0009055,GO:0046872	electron transfer activity|metal ion binding
LOC115712068	442.535	230.65	654.421	2.86242	1.51724	0.00358719	0.0258992	Up	10.5139	10.6715	11.6811	10.6688	3.50036	1.01076	8.19074	2.77501			GeneID:115712068	uncharacterized protein LOC115712068 isoform X1
LOC115712085	27.2493	1.45223	53.0463	42.5522	5.41116	0.00100427	0.00946837	Up	0.13225	8.96556	0.498706	0.251155	0	0.101409	0	0.173236			GeneID:115712085	cytochrome c oxidase-assembly factor COX23, mitochondrial-like
LOC115712103	94.0095	136.965	51.0543	0.365707	-1.45124	0.000901935	0.0086695	Down	0.84629	0.63278	0.39422	1.70172	1.68938	2.59573	2.4643	2.96704	PBL16	At5g56460	GeneID:115712103	probable serine/threonine-protein kinase PBL16 isoform X1
LOC115712133	251.785	408.209	95.3617	0.225856	-2.14652	4.16e-15	3.92e-13	Down	1.75655	1.32903	2.03447	3.31599	8.22866	9.9576	9.61325	8.62848			GeneID:115712133	ELMO domain-containing protein A
LOC115712136	12.4674	2.97913	21.9556	7.41465	2.89038	0.000621064	0.00644732	Up	0.918161	0.453865	2.76986	1.5693	0.140038	0.0704044	0.267358	0.300677			GeneID:115712136	uncharacterized protein LOC115712136
LOC115712146	408.654	222.668	594.639	2.45517	1.29582	0.00223686	0.017982	Up	17.2053	24.388	10.1305	5.5896	7.53967	3.39845	4.26875	6.20745		At1g66480	GeneID:115712146	uncharacterized protein At1g66480	GO:0005886	plasma membrane
LOC115712149	2069.93	1114.17	3025.69	2.71076	1.4387	8.83e-09	3.66e-07	Up	65.7155	60.0244	94.6848	78.0825	18.0413	29.94	40.5404	22.6021	H6H		GeneID:115712149	hyoscyamine 6-dioxygenase-like	GO:0047998,GO:0031418,GO:0046872	hyoscyamine (6S)-dioxygenase activity|L-ascorbic acid binding|metal ion binding
LOC115712164	37.3119	73.7149	0.908896	0.000151624	-12.6872	0.000204569	0.00263166	Down	0	0	0	0.122462	0	0	10.351	0	HSP22.0		GeneID:115712164	16.9 kDa class I heat shock protein 1-like	GO:0005783,GO:0005788,GO:0043621,GO:0051082,GO:0051259,GO:0006457,GO:0009408,GO:0042542,GO:0000302,GO:0009651	endoplasmic reticulum|endoplasmic reticulum lumen|protein self-association|unfolded protein binding|protein complex oligomerization|protein folding|response to heat|response to hydrogen peroxide|response to reactive oxygen species|response to salt stress	ko04141	Protein processing in endoplasmic reticulum
LOC115712165	258.674	413.47	103.878	0.251084	-1.99376	3.78e-08	1.36e-06	Down	2.9056	2.46753	2.26693	3.37739	10.401	7.46191	18.7085	7.67778	SABP2	LOC107791137	GeneID:115712165	probable esterase PIR7A	GO:0016298,GO:0080031,GO:0009862	lipase activity|methyl salicylate esterase activity|systemic acquired resistance, salicylic acid mediated signaling pathway
LOC115712218	284.844	0	569.688	2997.07	11.5493	8.02e-29	2.11e-26	Up	5.37391	5.09654	4.22204	3.6737	0	0	0	0	RPA1D	At5g61000	GeneID:115712218	replication protein A 70 kDa DNA-binding subunit D-like isoform X1	GO:0005662,GO:0000784,GO:0005524,GO:0003684,GO:0004386,GO:0046872,GO:0043565,GO:0003697,GO:0043047,GO:0006281,GO:0006268,GO:0006261,GO:0000724,GO:0051321,GO:0006289,GO:0000723,GO:0007004	DNA replication factor A complex|nuclear chromosome, telomeric region|ATP binding|damaged DNA binding|helicase activity|metal ion binding|sequence-specific DNA binding|single-stranded DNA binding|single-stranded telomeric DNA binding|DNA repair|DNA unwinding involved in DNA replication|DNA-dependent DNA replication|double-strand break repair via homologous recombination|meiotic cell cycle|nucleot…
LOC115712236	148.602	293.722	3.48255	0.0121861	-6.35862	1.15e-20	1.67e-18	Down	0.107579	0.0569768	0	0.229839	13.5673	4.85667	7.1364	7.79457		At3g49725	GeneID:115712236	uncharacterized protein LOC115712236 isoform X1	GO:0009507,GO:0005737,GO:0005525,GO:0046872,GO:0043022	chloroplast|cytoplasm|GTP binding|metal ion binding|ribosome binding
LOC115712262	612.571	841.675	383.467	0.462975	-1.11099	1.23e-07	4.02e-06	Down	24.401	16.5502	15.7661	21.6588	49.1501	51.9166	39.7567	31.9316			GeneID:115712262	uncharacterized protein LOC115712262
LOC115712268	27.7085	53.1322	2.28477	0.100341	-3.31701	0.0063325	0.0402301	Down	0.0734529	0	0	0.278987	0.0420114	0.16897	0.32083	7.79355			GeneID:115712268	uncharacterized protein LOC115712268
LOC115712280	38.0868	75.9097	0.263894	0.00390888	-7.99903	4.9e-11	2.86e-09	Down	0	0	0.017813	0	0.612398	2.22763	0.911272	1.37676			GeneID:115712280	box C/D snoRNA protein 1-like	GO:0005737,GO:0005634,GO:0070761,GO:0046872,GO:0000492,GO:0000463,GO:0048254,GO:0016074	cytoplasm|nucleus|pre-snoRNP complex|metal ion binding|box C/D snoRNP assembly|maturation of LSU-rRNA from tricistronic rRNA transcript (SSU-rRNA, 5.8S rRNA, LSU-rRNA)|snoRNA localization|snoRNA metabolic process
LOC115712293	7.38722	1.01732	13.7571	11.9115	3.57429	0.00826139	0.0490296	Up	0.107385	0.251872	0.0433867	0.0437002	0	0.00882246	0.0251272	0	SPP		GeneID:115712293	LOW QUALITY PROTEIN: stromal processing peptidase, chloroplastic-like	GO:0009570,GO:0046872,GO:0004222,GO:0016485	chloroplast stroma|metal ion binding|metalloendopeptidase activity|protein processing
LOC115712299	152.578	211.054	94.1017	0.44246	-1.17638	9e-05	0.00129043	Down	1.39562	1.44583	1.07569	2.18441	2.66661	3.73969	4.5049	2.93809	UGT85K5		GeneID:115712299	linamarin synthase 2-like	GO:0050057,GO:0006952	linamarin synthase activity|defense response
LOC115712304	178.189	249.722	106.656	0.442892	-1.17497	9.49e-06	0.000187688	Down	1.77747	1.27702	1.81847	2.1134	2.08629	4.10665	4.94512	5.40575	NPF52	At5g46050	GeneID:115712304	protein NRT1/ PTR FAMILY 5.2-like	GO:0016021,GO:0035673,GO:1904680,GO:0015333,GO:0042937,GO:0042742,GO:0042938,GO:0042538,GO:0009737,GO:0080052,GO:0009753,GO:0043201,GO:0080053,GO:0009751,GO:0009611,GO:0042939	integral component of membrane|oligopeptide transmembrane transporter activity|peptide transmembrane transporter activity|peptide:proton symporter activity|tripeptide transmembrane transporter activity|defense response to bacterium|dipeptide transport|hyperosmotic salinity response|response to abscisic acid|response to histidine|response to jasmonic acid|response to leucine|response to phenylalan…
LOC115712307	3.56493	0	7.12985	36.5201	5.19062	0.00290301	0.0219411	Up	0.166039	0.241832	0.140877	0.0788305	0	0	0	0		GSVIVT00037159001	GeneID:115712307	peroxidase 5-like	GO:0005576,GO:0020037,GO:0046872,GO:0004601,GO:0042744,GO:0006979	extracellular region|heme binding|metal ion binding|peroxidase activity|hydrogen peroxide catabolic process|response to oxidative stress	ko00940	Phenylpropanoid biosynthesis
LOC115712311	5058.12	7605.3	2510.94	0.329543	-1.60146	2.71e-08	1.03e-06	Down	41.3358	36.3414	44.4936	54.1067	189.079	94.9551	94.6718	154.541		At4g32940	GeneID:115712311	vacuolar-processing enzyme gamma-isozyme-like	GO:0000323,GO:0000326,GO:0004197,GO:0004175,GO:0010150,GO:0051603,GO:0009723,GO:0009753,GO:0009751,GO:0009611,GO:0006624	lytic vacuole|protein storage vacuole|cysteine-type endopeptidase activity|endopeptidase activity|leaf senescence|proteolysis involved in cellular protein catabolic process|response to ethylene|response to jasmonic acid|response to salicylic acid|response to wounding|vacuolar protein processing
LOC115712318	69.6402	3.80537	135.475	26.8262	4.74557	3.67e-06	8.16e-05	Up	2.60612	5.70971	0.769108	0.199814	0.0925821	0.055855	0	0.111319	CYP71B26	At3g26290	GeneID:115712318	cytochrome P450 71B26-like	GO:0016021,GO:0016020,GO:0020037,GO:0005506,GO:0016709	integral component of membrane|membrane|heme binding|iron ion binding|oxidoreductase activity,acting on paired donors, with incorporation or reduction of molecular oxygen, NAD(P)H as one donor, and incorporation of one atom of oxygen
LOC115712319	106.217	212.433	0	0.000844962	-10.2088	1.79e-20	2.53e-18	Down	0	0	0	0	3.70319	6.09802	7.42869	4.12538			GeneID:115712319	uncharacterized protein LOC115712319 isoform X1
LOC115712326	5.55236	11.1047	0	0.0164309	-5.92745	0.000120887	0.00166306	Down	0	0	0	0	0.155103	0.259928	0.394827	0.266419	FATB1		GeneID:115712326	palmitoyl-acyl carrier protein thioesterase, chloroplastic-like	GO:0009507,GO:0016790,GO:0006633	chloroplast|thiolester hydrolase activity|fatty acid biosynthetic process
LOC115712331	26.6279	52.5249	0.730871	0.012194	-6.35768	0.000111047	0.00155328	Down	0.0220944	0	0.0124975	0	0.707666	1.01652	0	0.738013			GeneID:115712331	uncharacterized protein LOC115712331
LOC115712349	92.2797	163.031	21.5285	0.131452	-2.92739	3.82e-15	3.61e-13	Down	0.274539	0.477755	0.532423	0.502754	4.0153	2.84197	4.26123	2.48524		At1g06620	GeneID:115712349	1-aminocyclopropane-1-carboxylate oxidase homolog 1-like	GO:0046872,GO:0016491	metal ion binding|oxidoreductase activity
LOC115712365	39.0706	76.3912	1.75007	0.022675	-5.46275	0.000100885	0.00143095	Down	0	0.124035	0.0264938	0.0222377	0.160736	5.52205	0.102292	1.93266			GeneID:115712365	salicylate carboxymethyltransferase-like	GO:0046872,GO:0008168	metal ion binding|methyltransferase activity
LOC115712381	4.70639	8.47306	0.939726	0.114091	-3.13174	0.00742661	0.0451355	Down	0.0187608	0.0198725	0	0.0356284	0.150224	0.107893	0.122916	0.2949	PMAT1	At5g39050	GeneID:115712381	phenolic glucoside malonyltransferase 1-like	GO:0005829,GO:0050736,GO:0009636	cytosol|O-malonyltransferase activity|response to toxic substance
LOC115712382	63.215	92.4541	33.9759	0.202622	-2.30314	0.00274024	0.0210896	Down	0.127683	0.135249	0.553705	2.22274	1.70399	0.807732	4.32215	1.5889	CHI9		GeneID:115712382	endochitinase-like	GO:0005618,GO:0005576,GO:0005773,GO:0008061,GO:0004568,GO:0016998,GO:0006032,GO:0006952,GO:0000272	cell wall|extracellular region|vacuole|chitin binding|chitinase activity|cell wall macromolecule catabolic process|chitin catabolic process|defense response|polysaccharide catabolic process	ko00520,ko04016	Amino sugar and nucleotide sugar metabolism|MAPK signaling pathway - plant
LOC115712389	155.235	246.34	64.1296	0.260096	-1.94288	8.06e-12	5.27e-10	Down	1.54047	1.01985	1.56843	1.11534	4.2732	7.06523	4.24737	4.67265	PMAT1	At5g39050	GeneID:115712389	phenolic glucoside malonyltransferase 1-like	GO:0005829,GO:0050736,GO:0009636	cytosol|O-malonyltransferase activity|response to toxic substance
LOC115712401	509.532	336.252	682.812	2.04828	1.03441	0.000303913	0.00365475	Up	17.5072	25.7903	12.1561	20.2323	11.3324	8.10895	10.875	7.15793			GeneID:115712401	uncharacterized protein LOC115712401
LOC115712413	85.1296	170.259	0	5.21e-08	-24.1949	8.67e-13	6.3e-11	Down	0	0	0	0	0	5.49604	0	1.86989	GSTT3	At5g41220	GeneID:115712413	glutathione S-transferase T3-like	GO:0005737,GO:0005634,GO:0004364,GO:0009407	cytoplasm|nucleus|glutathione transferase activity|toxin catabolic process
LOC115712428	181.071	90.17	271.972	3.03346	1.60096	4.7e-05	0.000735197	Up	2.93902	5.6881	3.63559	3.5471	1.8695	0.663454	1.48467	1.22782	HLS1	At4g37580	GeneID:115712428	probable N-acetyltransferase HLS1 isoform X1	GO:0008080,GO:0016747,GO:0009734,GO:0009640,GO:0040008,GO:0009723,GO:0009826	N-acetyltransferase activity|transferase activity, transferring acyl groups other than amino-acyl groups|auxin-activated signaling pathway|photomorphogenesis|regulation of growth|response to ethylene|unidimensional cell growth
LOC115712431	1034.97	1583.06	486.87	0.307454	-1.70156	1.97e-25	4.07e-23	Down	9.51501	10.5489	7.24972	9.28777	29.688	28.4221	34.5235	27.1716	PLP3	At4g37050	GeneID:115712431	patatin-like protein 3	GO:0005737,GO:0047372,GO:0004620,GO:0006952,GO:0016042,GO:0009737	cytoplasm|acylglycerol lipase activity|phospholipase activity|defense response|lipid catabolic process|response to abscisic acid
LOC115712442	17.2742	29.3835	5.16502	0.161936	-2.6265	2.34e-05	0.000408753	Down	0.114937	0.121747	0.0650127	0.0136422	0.525905	0.644474	0.329453	0.296408	VRN1	At3g18990	GeneID:115712442	B3 domain-containing transcription factor VRN1-like isoform X1	GO:0005654,GO:0003677,GO:0043565,GO:0009909,GO:0010048	nucleoplasm|DNA binding|sequence-specific DNA binding|regulation of flower development|vernalization response
LOC115712443	48.9044	75.7563	22.0526	0.291465	-1.77861	0.000733472	0.00733663	Down	0.330288	0.26656	0.302477	0.567508	1.38533	1.97184	0.583927	1.12797	LAZY1	At5g14090	GeneID:115712443	protein LAZY 1-like	GO:0016021,GO:0005634,GO:0005886,GO:0009959,GO:0009958,GO:2000012,GO:0040008	integral component of membrane|nucleus|plasma membrane|negative gravitropism|positive gravitropism|regulation of auxin polar transport|regulation of growth
LOC115712474	38.6606	61.8076	15.5135	0.238505	-2.06791	0.00207067	0.0169543	Down	0.734853	0.207573	0.443373	0.232592	0.812579	3.07099	0.802429	1.80486			GeneID:115712474	uncharacterized protein LOC115712474
LOC115712489	1271.01	815.941	1726.08	2.19375	1.1334	0.00146526	0.0128907	Up	22.0741	34.3578	23.2232	22.1505	4.73151	13.8401	17.8841	12.4098	Bp10		GeneID:115712489	L-ascorbate oxidase homolog	GO:0005576,GO:0005507,GO:0016491	extracellular region|copper ion binding|oxidoreductase activity
LOC115712518	112.151	178.182	46.1205	0.263479	-1.92424	0.000107863	0.00151947	Down	0.346834	1.58556	0.970589	0.658668	1.83755	4.22023	3.90688	3.98129	CYCD1-1	At1g70210	GeneID:115712518	cyclin-D1-1-like	GO:0000307,GO:0005737,GO:0005634,GO:0016538,GO:0019901,GO:0051301,GO:0000278,GO:0045787,GO:0008284,GO:0006468,GO:0000079,GO:0007088	cyclin-dependent protein kinase holoenzyme complex|cytoplasm|nucleus|cyclin-dependent protein serine/threonine kinase regulator activity|protein kinase binding|cell division|mitotic cell cycle|positive regulation of cell cycle|positive regulation of cell proliferation|protein phosphorylation|regulation of cyclin-dependent protein serine/threonine kinase activity|regulation of mitotic nuclear divi…
LOC115712528	14.854	23.8549	5.8531	0.237261	-2.07545	0.00189803	0.0158142	Down	0.20377	0.0664139	0.106394	0.0148838	0.69928	0.522839	0.171161	0.184792		At1g48100	GeneID:115712528	polygalacturonase At1g48100	GO:0005618,GO:0005576,GO:0004650,GO:0005975,GO:0009831	cell wall|extracellular region|polygalacturonase activity|carbohydrate metabolic process|plant-type cell wall modification involved in multidimensional cell growth	ko00040	Pentose and glucuronate interconversions
LOC115712530	46.559	80.5795	12.5385	0.148162	-2.75475	0.00183097	0.015371	Down	0.0166938	0.389027	0.207739	0.269476	1.43221	0.268817	2.82549	1.21364	PLP1	At4g37070	GeneID:115712530	patatin-like protein 1	GO:0005737,GO:0047372,GO:0004620,GO:0006952,GO:0010311,GO:0016042	cytoplasm|acylglycerol lipase activity|phospholipase activity|defense response|lateral root formation|lipid catabolic process
LOC115712532	20.9888	38.2563	3.72129	0.0939101	-3.41258	1.26e-06	3.16e-05	Down	0.060675	0.0514163	0.0686403	0.0115227	0.721824	0.390814	0.265018	0.584169	VRN1	At3g18990	GeneID:115712532	B3 domain-containing transcription factor VRN1-like isoform X1	GO:0005654,GO:0003677,GO:0043565,GO:0009909,GO:0010048	nucleoplasm|DNA binding|sequence-specific DNA binding|regulation of flower development|vernalization response
LOC115712599	119.873	58.8086	180.938	4.62738	2.2102	0.00131771	0.0117987	Up	4.38281	4.43256	3.43834	4.62176	4.08135	0.379982	0.432891	0.47602		At2g40290	GeneID:115712599	eukaryotic translation initiation factor 2 subunit alpha homolog	GO:0005829,GO:0033290,GO:0005850,GO:0005851,GO:0043614,GO:0005634,GO:0003729,GO:0043022,GO:0003743	cytosol|eukaryotic 48S preinitiation complex|eukaryotic translation initiation factor 2 complex|eukaryotic translation initiation factor 2B complex|multi-eIF complex|nucleus|mRNA binding|ribosome binding|translation initiation factor activity	ko03013,ko04141	RNA transport|Protein processing in endoplasmic reticulum
LOC115712608	74.7187	126.512	22.9259	0.179191	-2.48043	2.97e-05	0.000499407	Down	0.437357	0.704176	0.257282	0.299009	1.64096	1.30792	4.94769	1.59839	VRN1	At3g18990	GeneID:115712608	B3 domain-containing transcription factor VRN1-like isoform X1	GO:0005654,GO:0003677,GO:0043565,GO:0009909,GO:0010048	nucleoplasm|DNA binding|sequence-specific DNA binding|regulation of flower development|vernalization response
LOC115712630	86.6269	172.99	0.263894	0.00171443	-9.18805	6.93e-17	7.7e-15	Down	0	0	0.0129891	0	2.10144	1.98094	1.44182	2.92154		At1g60420	GeneID:115712630	probable nucleoredoxin 1	GO:0005829,GO:0047134,GO:0045454,GO:0009860,GO:0010183,GO:0080092,GO:0046686	cytosol|protein-disulfide reductase activity|cell redox homeostasis|pollen tube growth|pollen tube guidance|regulation of pollen tube growth|response to cadmium ion
LOC115712633	637.659	1145.56	129.757	0.11384	-3.13492	1.03e-15	1.02e-13	Down	2.91273	1.68475	3.88043	2.09252	27.4003	12.5854	18.4767	34.6023		At1g60420	GeneID:115712633	probable nucleoredoxin 1	GO:0005829,GO:0047134,GO:0045454,GO:0009860,GO:0010183,GO:0080092,GO:0046686	cytosol|protein-disulfide reductase activity|cell redox homeostasis|pollen tube growth|pollen tube guidance|regulation of pollen tube growth|response to cadmium ion
LOC115712669	10751	14779.7	6722.42	0.447415	-1.16031	5.63e-08	1.99e-06	Down	86.7548	63.4291	124.788	117.854	178.535	260.614	218.901	212.082	NPF31	At1g68570	GeneID:115712669	protein NRT1/ PTR FAMILY 3.1	GO:0016021,GO:0097708,GO:0005886,GO:0035673,GO:1904680,GO:0015333,GO:0010336,GO:0042128	integral component of membrane|intracellular vesicle|plasma membrane|oligopeptide transmembrane transporter activity|peptide transmembrane transporter activity|peptide:proton symporter activity|gibberellic acid homeostasis|nitrate assimilation
LOC115712672	17.7778	34.5854	0.970131	0.0251512	-5.31323	5.94e-05	0.000909017	Down	0	0.0251039	0.0268108	0.0450075	0.352429	0.163555	2.76904	0.256115	FMP32	YFL046W	GeneID:115712672	protein FMP32, mitochondrial-like	GO:0016021,GO:0005739,GO:0033617	integral component of membrane|mitochondrion|mitochondrial respiratory chain complex IV assembly
LOC115712714	6273.17	9544.84	3001.5	0.395145	-1.33955	0.0068908	0.0427034	Down	58.958	41.1832	62.6382	60.0722	88.5678	80.8605	65.3927	476.552	PUMP5	At2g22500	GeneID:115712714	mitochondrial uncoupling protein 5	GO:0016021,GO:0005743,GO:0015297,GO:0005310,GO:0015140,GO:0015131,GO:0017077,GO:0015141,GO:0015116,GO:0015117,GO:0071423,GO:0006839,GO:0015729,GO:0035435,GO:1902600,GO:0071422,GO:0008272,GO:0015709	integral component of membrane|mitochondrial inner membrane|antiporter activity|dicarboxylic acid transmembrane transporter activity|malate transmembrane transporter activity|oxaloacetate transmembrane transporter activity|oxidative phosphorylation uncoupler activity|succinate transmembrane transporter activity|sulfate transmembrane transporter activity|thiosulfate transmembrane transporter activ…
LOC115712719	318.968	625.972	11.9635	0.017118	-5.86834	1.36e-20	1.96e-18	Down	0.581716	0.0684652	0.389975	0.0613739	11.953	10.6558	23.9733	11.1124	CEQORH	At4g13010	GeneID:115712719	chloroplast envelope quinone oxidoreductase homolog	GO:0009507,GO:0009941,GO:0009706,GO:0009535,GO:0005886,GO:0005773,GO:0016491	chloroplast|chloroplast envelope|chloroplast inner membrane|chloroplast thylakoid membrane|plasma membrane|vacuole|oxidoreductase activity	ko00592	alpha-Linolenic acid metabolism
LOC115712720	224.039	445.148	2.92968	0.00590149	-7.4047	3.26e-26	7.28e-24	Down	0.131951	0.0399341	0.0639741	0	6.2316	7.71854	15.3759	6.6483	CEQORH	At4g13010	GeneID:115712720	chloroplast envelope quinone oxidoreductase homolog	GO:0009507,GO:0009941,GO:0009706,GO:0009535,GO:0005886,GO:0005773,GO:0016491	chloroplast|chloroplast envelope|chloroplast inner membrane|chloroplast thylakoid membrane|plasma membrane|vacuole|oxidoreductase activity	ko00592	alpha-Linolenic acid metabolism
LOC115712737	36.5238	69.3576	3.69004	0.0501162	-4.31858	3.27e-07	9.64e-06	Down	0.0188629	0.0199806	0.0640176	0.0447779	0.291293	1.47533	0.205975	0.833919	HPCA1	At5g49760	GeneID:115712737	probable leucine-rich repeat receptor-like protein kinase At5g49770 isoform X1
LOC115712746	1959.89	3513.64	406.138	0.111128	-3.1697	4.6e-08	1.64e-06	Down	2.80604	2.27984	5.96197	6.25526	25.9777	8.44469	94.0747	23.2199	SBT17	At5g67360	GeneID:115712746	subtilisin-like protease SBT1.7	GO:0048046,GO:0005618,GO:0005576,GO:0009505,GO:0004252,GO:0080001,GO:0048359,GO:0010214	apoplast|cell wall|extracellular region|plant-type cell wall|serine-type endopeptidase activity|mucilage extrusion from seed coat|mucilage metabolic process involved in seed coat development|seed coat development
LOC115712821	181.381	277.178	85.5841	0.31695	-1.65767	3.11e-08	1.16e-06	Down	0.958725	1.02682	1.14484	0.738396	1.71814	3.28366	3.89675	3.75707			GeneID:115712821	uncharacterized protein LOC115712821
LOC115712847	3139.33	4883.41	1395.26	0.294088	-1.76568	1.52e-11	9.46e-10	Down	32.8223	26.3689	34.7683	32.1579	173.489	86.4867	82.3402	97.5119			GeneID:115712847	probable mannitol dehydrogenase	GO:0046029,GO:0008270	mannitol dehydrogenase activity|zinc ion binding
LOC115712859	3466.55	2187.93	4745.17	2.15508	1.10774	0.00158652	0.0137558	Up	126.291	162.089	160.971	177.346	60.5829	53.2031	136.133	42.3176	MLP423	At1g24020	GeneID:115712859	MLP-like protein 423	GO:0016020,GO:0006952	membrane|defense response
LOC115712860	33632.6	21620	45645.2	2.07518	1.05323	6.76e-05	0.00101446	Up	1396.92	1269.24	2048.99	2256.73	542.269	806.495	1336.62	657.902	MLP423	At1g24020	GeneID:115712860	MLP-like protein 423	GO:0016020,GO:0006952	membrane|defense response
LOC115712902	995.941	618.445	1373.44	2.24901	1.16929	2.6e-10	1.36e-08	Up	38.8704	37.3685	51.0216	36.2962	15.6025	14.7522	19.7361	23.9327			GeneID:115712902	uncharacterized protein LOC115712902
LOC115712912	798.81	1580.86	16.7595	0.0105893	-6.56125	4.97e-57	4.15e-54	Down	0.345112	0.168721	0.255274	0.176454	13.4679	20.9313	38.9168	16.7699	FKBP65	At5g48570	GeneID:115712912	LOW QUALITY PROTEIN: peptidyl-prolyl cis-trans isomerase FKBP62-like	GO:0005737,GO:0005634,GO:0005773,GO:0005516,GO:0005528,GO:0003755,GO:0070370,GO:0061077,GO:0000413	cytoplasm|nucleus|vacuole|calmodulin binding|FK506 binding|peptidyl-prolyl cis-trans isomerase activity|cellular heat acclimation|chaperone-mediated protein folding|protein peptidyl-prolyl isomerization
LOC115712936	1374.85	824.385	1925.32	2.33903	1.22591	4.35e-05	0.000688927	Up	18.1707	22.146	20.6786	19.3101	9.69462	10.0989	4.19189	10.473	GPI16	YHR188C	GeneID:115712936	LOW QUALITY PROTEIN: GPI transamidase component PIG-T-like	GO:0042765,GO:0003923,GO:0016255	GPI-anchor transamidase complex|GPI-anchor transamidase activity|attachment of GPI anchor to protein	ko00563	Glycosylphosphatidylinositol (GPI)-anchor biosynthesis
[truncated: 529 more rows]
