# Supplementary material for: Transcriptomic and metabolomic analyses reveal the differential accumulation of phenylpropanoids and terpenoids in hemp autotetraploid and its diploid progenitor
Source: BMC Plant Biol. 2023 Dec 5;23:616. doi: 10.1186/s12870-023-04630-z (PMC10696708; doi:10.1186/s12870-023-04630-z)
Supplement: Supplementary file 4 — Additional file 4: Supplementary Table S6. Genes of module. [file 12870_2023_4630_MOESM4_ESM.xlsx]

## Sheet: black_536
Supplementary Table S6: Genes of module (XLS).
black module
Gene id	Modules	Cs4XF1	Cs4XF2	Cs4XF3	Cs4XF4	Cs2XF1	Cs2XF2	Cs2XF3	Cs2XF4	gene_symbol	gene_homologs	description	gene_Dbxref	GO_id	GO_term	pathway	pathway_description
LOC115694727	black	2.42861	1.79145	1.36925	2.52716	1.77259	1.16694	1.46416	1.29447				GeneID:115694727
LOC115694766	black	6.05175	6.02787	5.71854	5.82379	6.26643	5.15326	4.9998	4.87733	NFYB3	At4g14540	Nuclear transcription factor Y subunit B-3	GeneID:115694766	GO:0005634,GO:0003700,GO:0046982,GO:0043565,GO:0045893	nucleus|DNA-binding transcription factor activity|protein heterodimerization activity|sequence-specific DNA binding|positive regulation of transcription, DNA-templated
LOC115695563	black	1.53002	2.14962	1.41605	1.08434	1.14715	0.421467	0.330774	0.989375	STP1	At1g11260	Sugar transport protein 1	GeneID:115695563	GO:0005887,GO:0005634,GO:0005886,GO:0009506,GO:0005773,GO:0005351,GO:0005355,GO:0015145,GO:0008645,GO:0015749	integral component of plasma membrane|nucleus|plasma membrane|plasmodesma|vacuole|carbohydrate:proton symporter activity|glucose transmembrane transporter activity|monosaccharide transmembrane transporter activity|hexose transmembrane transport|monosaccharide transmembrane transport
LOC115695669	black	0.984153	1.94037	0.469772	0.64649	0	0	0.0654884	0				GeneID:115695669
LOC115695698	black	4.69737	3.98455	4.4029	4.8499	3.86705	3.29868	3.37657	3.97648	AIL5	At5g57390	AP2-like ethylene-responsive transcription factor AIL5	GeneID:115695698	GO:0005634,GO:0003677,GO:0003700,GO:0060774,GO:0009873,GO:0010311,GO:0060772,GO:0060771,GO:0040019,GO:0009791,GO:0048364,GO:0009845	nucleus|DNA binding|DNA-binding transcription factor activity|auxin mediated signaling pathway involved in phyllotactic patterning|ethylene-activated signaling pathway|lateral root formation|leaf phyllotactic patterning|phyllotactic patterning|positive regulation of embryonic development|post-embryonic development|root development|seed germination
LOC115695776	black	7.16737	6.98256	7.07182	6.9326	7.33908	5.00052	5.05731	6.58115				GeneID:115695776
LOC115695889	black	6.70868	7.25112	7.26631	7.90021	7.36187	6.23444	6.7074	6.75446	GEL		Ribosome-inactivating protein gelonin	GeneID:115695889	GO:0030598,GO:0090729,GO:0006952,GO:0017148	rRNA N-glycosylase activity|toxin activity|defense response|negative regulation of translation
LOC115695941	black	3.11139	3.72296	2.46071	1.71973	2.20706	1.91779	1.56088	2.24037	MDL1		(R)-mandelonitrile lyase 1	GeneID:115695941	GO:0033095,GO:0005773,GO:0050660,GO:0046593,GO:0016614	aleurone grain|vacuole|flavin adenine dinucleotide binding|mandelonitrile lyase activity|oxidoreductase activity, acting on CH-OH group of donors	ko00460	Cyanoamino acid metabolism
LOC115695974	black	4.29152	4.95239	3.79653	4.16514	5.15624	3.49119	3.6261	3.89793	MIP1A	At4g15248	B-box domain protein 30	GeneID:115695974	GO:0005634,GO:0030674,GO:0008270,GO:0007623,GO:0009909	nucleus|protein binding, bridging|zinc ion binding|circadian rhythm|regulation of flower development
LOC115695982	black	4.42974	5.04303	3.96935	3.43775	4.03791	3.28241	3.37654	3.76542				GeneID:115695982
LOC115695989	black	2.32037	1.948	2.17295	2.58097	1.81876	0.910588	1.01498	1.19801				GeneID:115695989
LOC115696238	black	3.36026	4.24638	2.83578	3.46503	3.30469	2.09006	3.84238	2.84161				GeneID:115696238
LOC115696581	black	5.28616	5.53449	4.64193	4.23517	4.53674	3.52554	3.5071	4.09928	GA2OX1		Gibberellin 2-beta-dioxygenase	GeneID:115696581	GO:0045543,GO:0046872,GO:0009686	gibberellin 2-beta-dioxygenase activity|metal ion binding|gibberellin biosynthetic process	ko00904	Diterpenoid biosynthesis
LOC115696736	black	3.44124	3.37668	3.59729	3.50874	2.63968	0.150038	0.037048	1.83768				GeneID:115696736
LOC115696869	black	1.91612	2.49473	1.68603	1.05454	0.816874	0.920984	0.634113	1.20675	LAC7	At3g09220	Laccase-7	GeneID:115696869	GO:0048046,GO:0005507,GO:0052716,GO:0016722,GO:0046274	apoplast|copper ion binding|hydroquinone:oxygen oxidoreductase activity|oxidoreductase activity, oxidizing metal ions|lignin catabolic process
LOC115696926	black	2.12542	2.05892	1.76068	1.694	1.3073	1.03779	0.407571	1.50369	PUP10	At4g18210	Probable purine permease 10	GeneID:115696926	GO:0016021,GO:0016020,GO:0005345,GO:0006863,GO:0009624	integral component of membrane|membrane|purine nucleobase transmembrane transporter activity|purine nucleobase transport|response to nematode
LOC115696955	black	1.86426	1.07174	1.60261	1.60959	1.47769	0.40289	0.38498	1.54901				GeneID:115696955
LOC115696962	black	5.04637	5.99401	4.51452	3.23647	3.31601	2.67117	1.59043	3.33481	LAC7	At3g09220	Laccase-7	GeneID:115696962	GO:0048046,GO:0005507,GO:0052716,GO:0016722,GO:0046274	apoplast|copper ion binding|hydroquinone:oxygen oxidoreductase activity|oxidoreductase activity, oxidizing metal ions|lignin catabolic process
LOC115696971	black	3.20539	4.08595	2.90225	2.29592	2.44871	2.27154	2.83546	2.64791	CAT1	At4g21120	Cationic amino acid transporter 1	GeneID:115696971	GO:0016021,GO:0016020,GO:0005886,GO:0005313,GO:0015189,GO:0051938	integral component of membrane|membrane|plasma membrane|L-glutamate transmembrane transporter activity|L-lysine transmembrane transporter activity|L-glutamate import
LOC115696986	black	2.75876	3.09719	1.85062	1.00786	2.17834	0.776356	0.58803	1.65733	THCAS		Tetrahydrocannabinolic acid synthase	GeneID:115696986	GO:0048046,GO:0102778,GO:0071949	apoplast|Delta9-tetrahydrocannabinolate synthase activity|FAD binding
LOC115697019	black	1.23202	2.90564	1.32716	0.209832	0.479582	0.119287	0.443677	0.21658	CBDAS2		Cannabidiolic acid synthase-like 1	GeneID:115697019	GO:0005576,GO:0071949,GO:0016491	extracellular region|FAD binding|oxidoreductase activity
LOC115697041	black	4.73323	4.77603	4.32557	3.78607	4.10325	3.55866	3.32448	4.36489	AMT2	At2g38290	Ammonium transporter 2	GeneID:115697041	GO:0016021,GO:0005886,GO:0009506,GO:0015398,GO:0015696,GO:0009624	integral component of membrane|plasma membrane|plasmodesma|high-affinity secondary active ammonium transmembrane transporter activity|ammonium transport|response to nematode
LOC115697076	black	2.53875	3.28331	2.08051	1.93022	2.47659	1.20623	2.21315	2.08614	DOF15	At1g29160	Dof zinc finger protein DOF1.5	GeneID:115697076	GO:0005634,GO:0003677,GO:0003700,GO:0046872,GO:0043565,GO:0044212,GO:0006355,GO:0010214	nucleus|DNA binding|DNA-binding transcription factor activity|metal ion binding|sequence-specific DNA binding|transcription regulatory region DNA binding|regulation of transcription, DNA-templated|seed coat development
LOC115697077	black	1.90341	2.09964	1.38432	0.753584	1.19421	0.286826	0.616961	1.14452	ACR4	At3g59420	Serine/threonine-protein kinase-like protein ACR4	GeneID:115697077
LOC115697135	black	2.04728	3.72725	2.06889	1.572	2.33582	2.20284	2.46479	1.84789		At4g08290	WAT1-related protein At4g08290	GeneID:115697135	GO:0016021,GO:0005886,GO:0022857	integral component of membrane|plasma membrane|transmembrane transporter activity
LOC115697177	black	2.25336	2.54185	1.67305	1.60619	1.8058	0.398271	0.0227382	0.639144				GeneID:115697177
LOC115697211	black	5.34119	5.75275	4.85575	5.1983	5.85774	3.97269	4.45693	4.44861		At2g19810	Zinc finger CCCH domain-containing protein 20	GeneID:115697211	GO:0005886,GO:0003677,GO:0003700,GO:0046872,GO:0003727,GO:0006355,GO:0006979	plasma membrane|DNA binding|DNA-binding transcription factor activity|metal ion binding|single-stranded RNA binding|regulation of transcription, DNA-templated|response to oxidative stress
LOC115697305	black	5.40909	5.75892	4.93268	5.12164	4.8726	3.97481	3.84017	4.73582		At1g53430	Probable LRR receptor-like serine/threonine-protein kinase At1g53430	GeneID:115697305
LOC115697412	black	5.88173	6.39558	5.06212	4.68019	5.32349	3.35814	3.9961	5.10986			Uncharacterized protein C167.05	GeneID:115697412	GO:0005829,GO:0003824	cytosol|catalytic activity
LOC115697470	black	4.66045	4.89814	4.17444	4.39447	4.19234	3.42601	3.71569	3.16903		At5g01610	Uncharacterized protein At5g01610	GeneID:115697470
LOC115697592	black	4.4948	5.09984	3.81422	3.80803	4.82992	3.55218	3.77967	4.00189				GeneID:115697592
LOC115697673	black	7.91353	8.97736	7.62265	7.30286	8.73876	6.45519	6.46312	6.96457	TSJT1		Stem-specific protein TSJT1	GeneID:115697673
LOC115697894	black	2.65304	2.81443	2.32997	2.07563	2.84815	1.30507	2.66988	2.52824	NAC073	At4g28500	NAC domain-containing protein 73	GeneID:115697894	GO:0005634,GO:0003700,GO:0043565,GO:0044212,GO:0045893,GO:2000652	nucleus|DNA-binding transcription factor activity|sequence-specific DNA binding|transcription regulatory region DNA binding|positive regulation of transcription, DNA-templated|regulation of secondary cell wall biogenesis
LOC115697903	black	5.14991	4.65218	3.82416	5.2236	5.90216	3.9956	4.67856	3.20355				GeneID:115697903
LOC115698217	black	3.78722	3.65751	3.42335	4.08552	3.85561	2.43553	4.46922	3.11933	CYP82A4		Cytochrome P450 82A4	GeneID:115698217	GO:0016020,GO:0020037,GO:0005506,GO:0016709,GO:0042343	membrane|heme binding|iron ion binding|oxidoreductase activity,acting on paired donors, with incorporation or reduction of molecular oxygen, NAD(P)H as one donor, and incorporation of one atom of oxygen|indole glucosinolate metabolic process
LOC115698294	black	2.80795	3.34142	2.43019	2.02625	2.0956	1.86842	1.27253	2.27513	CHX20	At3g53720	Cation/H(+) antiporter 20	GeneID:115698294	GO:0012505,GO:0005783,GO:0016021,GO:0015299,GO:0030007,GO:0006813,GO:0006623,GO:0006885,GO:0030104	endomembrane system|endoplasmic reticulum|integral component of membrane|solute:proton antiporter activity|cellular potassium ion homeostasis|potassium ion transport|protein targeting to vacuole|regulation of pH|water homeostasis
LOC115698388	black	6.91039	6.75879	6.00378	6.69839	7.79519	5.98171	5.77585	5.93937	ATJ11	At4g36040	Chaperone protein dnaJ 11, chloroplastic	GeneID:115698388	GO:0009507,GO:0009570,GO:0005634,GO:0009536	chloroplast|chloroplast stroma|nucleus|plastid
LOC115698508	black	5.25757	4.68605	4.87886	4.99445	4.75572	3.97866	3.6896	4.62979	AATP1	At5g40010	AAA-ATPase ASD, mitochondrial	GeneID:115698508	GO:0005783,GO:0016021,GO:0031966,GO:0005739,GO:0005524,GO:0016887,GO:0010154,GO:0009737,GO:0009409,GO:0009651,GO:0009414,GO:0010431	endoplasmic reticulum|integral component of membrane|mitochondrial membrane|mitochondrion|ATP binding|ATPase activity|fruit development|response to abscisic acid|response to cold|response to salt stress|response to water deprivation|seed maturation
LOC115698568	black	1.92023	2.22632	1.73873	0.774702	2.05357	0.813706	2.04928	1.95717	CRRSP38	At3g22060	Cysteine-rich repeat secretory protein 38	GeneID:115698568	GO:0005618,GO:0005576,GO:0005773,GO:0009737	cell wall|extracellular region|vacuole|response to abscisic acid
LOC115698586	black	4.09022	4.24612	4.08067	3.44078	4.18923	2.4234	3.04653	4.11984	PER70		Peroxidase 70	GeneID:115698586	GO:0005576,GO:0020037,GO:0046872,GO:0004601,GO:0042744,GO:0006979	extracellular region|heme binding|metal ion binding|peroxidase activity|hydrogen peroxide catabolic process|response to oxidative stress	ko00940	Phenylpropanoid biosynthesis
LOC115698601	black	3.2461	4.84015	2.78907	2.72765	3.58006	2.47341	2.84957	3.2376	CYP79A68		Tryptophan N-monooxygenase CYP79A68	GeneID:115698601			ko00460,ko00966	Cyanoamino acid metabolism|Glucosinolate biosynthesis
LOC115698757	black	1.61323	0.769851	1.21276	1.67467	1.09906	0.100006	0.76905	0.743637	PER11	At1g68850	Peroxidase 11	GeneID:115698757	GO:0005576,GO:0020037,GO:0046872,GO:0004601,GO:0042744,GO:0006979,GO:0048511	extracellular region|heme binding|metal ion binding|peroxidase activity|hydrogen peroxide catabolic process|response to oxidative stress|rhythmic process	ko00940	Phenylpropanoid biosynthesis
LOC115698814	black	3.62652	4.48621	3.55036	3.25048	2.99298	2.57543	2.57757	2.76481	MPH1	Os06g0670300	Myb family transcription factor MPH1	GeneID:115698814	GO:0005634,GO:0003677,GO:0003700,GO:0006355	nucleus|DNA binding|DNA-binding transcription factor activity|regulation of transcription, DNA-templated
LOC115698821	black	2.95433	3.11101	3.28634	3.88156	3.10794	1.30272	1.62713	1.54728			Peroxidase 4	GeneID:115698821	GO:0005576,GO:0020037,GO:0046872,GO:0004601,GO:0042744,GO:0006979	extracellular region|heme binding|metal ion binding|peroxidase activity|hydrogen peroxide catabolic process|response to oxidative stress	ko00940	Phenylpropanoid biosynthesis
LOC115698829	black	4.89736	4.82684	4.60649	4.76379	4.00948	3.21008	4.34887	3.71259	EMB1687	At1g04635	Probable ribonuclease P/MRP protein subunit POP5	GeneID:115698829	GO:0005655,GO:0000172,GO:0005773,GO:0004526,GO:0006364,GO:0008033	nucleolar ribonuclease P complex|ribonuclease MRP complex|vacuole|ribonuclease P activity|rRNA processing|tRNA processing	ko03008,ko03013	Ribosome biogenesis in eukaryotes|RNA transport
LOC115698834	black	2.75577	3.03951	2.15024	2.74658	3.28438	1.8767	1.29063	2.45412		At5g40670	Cystinosin homolog	GeneID:115698834	GO:0016021,GO:0005765,GO:0005774,GO:0015184,GO:0015811	integral component of membrane|lysosomal membrane|vacuolar membrane|L-cystine transmembrane transporter activity|L-cystine transport
LOC115698844	black	3.27602	4.15133	2.47444	2.16885	2.37193	1.03551	2.80324	3.70014	WRKY75	At5g13080	Probable WRKY transcription factor 75	GeneID:115698844	GO:0005634,GO:0003700,GO:0000978,GO:0044212,GO:0010055,GO:0048527,GO:0000122,GO:0043620,GO:0032107	nucleus|DNA-binding transcription factor activity|RNA polymerase II proximal promoter sequence-specific DNA binding|transcription regulatory region DNA binding|atrichoblast differentiation|lateral root development|negative regulation of transcription by RNA polymerase II|regulation of DNA-templated transcription in response to stress|regulation of response to nutrient levels
LOC115698847	black	5.12405	5.38974	5.3793	5.6347	4.88321	3.50852	4.42392	3.91394				GeneID:115698847
LOC115698869	black	2.80419	2.95213	2.03699	1.64005	1.73737	1.15242	1.58668	2.31494	MES11	At1gXXXXX	Putative methylesterase 11, chloroplastic	GeneID:115698869	GO:0009507,GO:0080030,GO:0080032,GO:0080031,GO:0009694,GO:0009696	chloroplast|methyl indole-3-acetate esterase activity|methyl jasmonate esterase activity|methyl salicylate esterase activity|jasmonic acid metabolic process|salicylic acid metabolic process
LOC115698928	black	3.44302	3.47271	3.57797	2.64554	2.03635	1.73957	2.2179	2.97458	NAC090	At5g22380	NAC domain-containing protein 90	GeneID:115698928	GO:0005634,GO:0003677,GO:0003700	nucleus|DNA binding|DNA-binding transcription factor activity
LOC115698934	black	3.32411	3.07782	2.55064	2.45088	3.06069	2.2647	1.47159	2.43258		At5g34940	Heparanase-like protein 3	GeneID:115698934	GO:0005576,GO:0005765,GO:0009505,GO:0004566	extracellular region|lysosomal membrane|plant-type cell wall|beta-glucuronidase activity	ko00531	Glycosaminoglycan degradation
LOC115698991	black	4.03633	4.1942	3.02776	3.16968	2.67437	2.37071	2.20184	2.72149	SAUR50	At4g34760	Auxin-responsive protein SAUR50	GeneID:115698991	GO:0009734,GO:0040008	auxin-activated signaling pathway|regulation of growth	ko04075	Plant hormone signal transduction
LOC115699138	black	6.43371	7.02377	5.68432	5.92276	6.93952	5.88501	5.34158	5.76615			4-hydroxyphenylpyruvate dioxygenase	GeneID:115699138	GO:0005737,GO:0003868,GO:0046872,GO:0006559,GO:0006572	cytoplasm|4-hydroxyphenylpyruvate dioxygenase activity|metal ion binding|L-phenylalanine catabolic process|tyrosine catabolic process	ko00130,ko00350,ko00360	Ubiquinone and other terpenoid-quinone biosynthesis|Tyrosine metabolism|Phenylalanine metabolism
LOC115699220	black	8.56628	9.19465	8.01101	8.39629	8.95792	6.68287	8.10436	7.86432		At2g44130	F-box/kelch-repeat protein At2g44130	GeneID:115699220	GO:0005829,GO:2000762	cytosol|regulation of phenylpropanoid metabolic process
LOC115699321	black	6.90203	7.09166	6.44501	6.64903	7.0366	5.72804	5.80547	6.80926	RAV1	At1g13260	AP2/ERF and B3 domain-containing transcription factor RAV1	GeneID:115699321	GO:0005634,GO:0003677,GO:0003700,GO:0009873,GO:0048527,GO:0048366,GO:0009910,GO:0045892,GO:0009741	nucleus|DNA binding|DNA-binding transcription factor activity|ethylene-activated signaling pathway|lateral root development|leaf development|negative regulation of flower development|negative regulation of transcription, DNA-templated|response to brassinosteroid
LOC115699327	black	5.2303	4.86981	5.17331	4.68151	4.01568	3.81071	3.10739	4.84004	AOC		Allene oxide cyclase, chloroplastic	GeneID:115699327	GO:0009507,GO:0046423,GO:0009734,GO:0007623,GO:0050832,GO:0080186,GO:0009908,GO:0009864,GO:0009695,GO:0048573,GO:1900367,GO:0009737,GO:0009646,GO:0009637,GO:0009723,GO:0010218,GO:0042542,GO:0009625,GO:0010038,GO:0010114,GO:0009751,GO:0009651,GO:0033274,GO:0009611,GO:0006636	chloroplast|allene-oxide cyclase activity|auxin-activated signaling pathway|circadian rhythm|defense response to fungus|developmental vegetative growth|flower development|induced systemic resistance, jasmonic acid mediated signaling pathway|jasmonic acid biosynthetic process|photoperiodism, flowering|positive regulation of defense response to insect|response to abscisic acid|response to absence o…	ko00592	alpha-Linolenic acid metabolism
LOC115699374	black	3.91398	3.41256	3.35638	4.05948	3.94585	2.72985	2.75523	3.46849				GeneID:115699374
LOC115699549	black	5.58195	5.8478	5.80763	5.88	5.02702	4.29199	5.10428	4.82968	SS3		Soluble starch synthase 3, chloroplastic/amyloplastic	GeneID:115699549	GO:0009501,GO:0009507,GO:0033201,GO:0004373,GO:2001070,GO:0009011,GO:0019252	amyloplast|chloroplast|alpha-1,4-glucan synthase activity|glycogen (starch) synthase activity|starch binding|starch synthase activity|starch biosynthetic process
LOC115699693	black	3.70454	3.86512	3.25372	2.84586	2.7142	2.10231	2.78577	3.05269		At2g34850	Putative UDP-arabinose 4-epimerase 2	GeneID:115699693	GO:0032580,GO:0016021,GO:0050373,GO:0003978,GO:0045227,GO:0009793,GO:0006012,GO:0048868,GO:0033358	Golgi cisterna membrane|integral component of membrane|UDP-arabinose 4-epimerase activity|UDP-glucose 4-epimerase activity|capsule polysaccharide biosynthetic process|embryo development ending in seed dormancy|galactose metabolic process|pollen tube development|UDP-L-arabinose biosynthetic process	ko00520	Amino sugar and nucleotide sugar metabolism
LOC115699796	black	5.9759	5.74306	5.56329	6.09657	7.09278	0	0.0180274	5.59156				GeneID:115699796
LOC115699976	black	1.22258	2.33393	0.666048	0.707676	0.466117	0.200546	0.963934	0.172975				GeneID:115699976
LOC115700032	black	1.54388	1.68137	2.87022	1.60527	1.3216	0.587422	0	0.642782				GeneID:115700032
LOC115700119	black	1.79794	2.03108	2.00518	1.54467	1.18522	0.621746	0.88054	1.89928	RLP47	At4g13810	Receptor-like protein 47	GeneID:115700119	GO:0016021,GO:0005886	integral component of membrane|plasma membrane
LOC115700173	black	7.25159	8.45039	7.11115	6.74921	8.08984	6.10577	6.82701	7.02787		At2g24580	Probable sarcosine oxidase	GeneID:115700173	GO:0008115,GO:0046653	sarcosine oxidase activity|tetrahydrofolate metabolic process	ko00260,ko00310,ko04146	Glycine, serine and threonine metabolism|Lysine degradation|Peroxisome
LOC115700331	black	2.29679	1.7948	2.00518	2.16316	1.87461	1.54375	1.06427	0.862399	MAF1		MFP1 attachment factor 1	GeneID:115700331	GO:0005794,GO:0005635,GO:0016363	Golgi apparatus|nuclear envelope|nuclear matrix
LOC115700454	black	6.24556	6.12637	6.46931	6.26823	5.00215	2.51149	4.96287	4.99974	UGT71K2		UDP-glycosyltransferase 71K2	GeneID:115700454	GO:0035251	UDP-glucosyltransferase activity
LOC115700540	black	5.49861	6.27327	4.92922	3.87316	4.91107	3.70949	4.48136	4.45917	LHT1	At5g40780	Lysine histidine transporter 1	GeneID:115700540	GO:0016021,GO:0005886,GO:0015171,GO:0015293,GO:0043090,GO:0003333,GO:0080167	integral component of membrane|plasma membrane|amino acid transmembrane transporter activity|symporter activity|amino acid import|amino acid transmembrane transport|response to karrikin
LOC115700564	black	6.54859	5.99614	5.70968	5.97859	5.81078	4.05231	4.34703	5.32654	HHO2	At1g68670	Transcription factor HHO2	GeneID:115700564	GO:0005634,GO:0003677,GO:0003700,GO:0055062,GO:0006355,GO:0009737	nucleus|DNA binding|DNA-binding transcription factor activity|phosphate ion homeostasis|regulation of transcription, DNA-templated|response to abscisic acid
LOC115700658	black	4.94636	5.04461	4.70868	4.7985	5.09572	3.01676	3.92595	4.51052				GeneID:115700658
LOC115700704	black	5.06581	5.18885	5.40259	5.74323	4.73291	3.71867	3.97844	4.24514	NFD4	At1g31470	Protein NUCLEAR FUSION DEFECTIVE 4	GeneID:115700704	GO:0016021,GO:0005739,GO:0000741,GO:0010197,GO:0009651	integral component of membrane|mitochondrion|karyogamy|polar nucleus fusion|response to salt stress
LOC115700705	black	3.69427	3.49859	2.88171	2.25312	2.95578	2.30022	2.99771	2.77093	PER55	At5g14130	Peroxidase 55	GeneID:115700705	GO:0005576,GO:0020037,GO:0046872,GO:0004601,GO:0042744,GO:0006979	extracellular region|heme binding|metal ion binding|peroxidase activity|hydrogen peroxide catabolic process|response to oxidative stress	ko00940	Phenylpropanoid biosynthesis
LOC115700730	black	3.66889	4.88044	3.95242	3.9138	4.84387	3.42577	3.79033	3.85765	MPC1	At5g20090	Mitochondrial pyruvate carrier 1	GeneID:115700730	GO:0031305,GO:0016020,GO:0005739,GO:0005886,GO:0005774,GO:0050833,GO:0006850,GO:0010119	integral component of mitochondrial inner membrane|membrane|mitochondrion|plasma membrane|vacuolar membrane|pyruvate transmembrane transporter activity|mitochondrial pyruvate transmembrane transport|regulation of stomatal movement
LOC115700765	black	2.85218	3.81894	2.18157	2.32403	3.71397	1.6422	3.96755	2.65132				GeneID:115700765
LOC115700796	black	5.43493	5.55685	5.37327	5.25169	4.6906	3.61344	4.65228	4.53846	UGT82A1	At3g22250	UDP-glycosyltransferase 82A1	GeneID:115700796	GO:0043231,GO:0080043,GO:0080044,GO:0008194	intracellular membrane-bounded organelle|quercetin 3-O-glucosyltransferase activity|quercetin 7-O-glucosyltransferase activity|UDP-glycosyltransferase activity
LOC115700906	black	2.1476	2.8942	0.966741	0	0.536417	0.0904362	0.576601	0.685105	PCR9	At1g58320	Protein PLANT CADMIUM RESISTANCE 9	GeneID:115700906	GO:0016021	integral component of membrane
LOC115700938	black	1.96566	2.30484	0.895501	0.826709	0.457116	0.209374	0.698455	0.341201	rglB		Rhamnogalacturonate lyase B	GeneID:115700938	GO:0005576,GO:0030246,GO:0016837,GO:0102210,GO:0071555,GO:0045490	extracellular region|carbohydrate binding|carbon-oxygen lyase activity, acting on polysaccharides|rhamnogalacturonan endolyase activity|cell wall organization|pectin catabolic process
LOC115700952	black	5.75343	6.35662	5.45063	5.8042	6.03725	4.5866	5.38245	5.058				GeneID:115700952
LOC115701062	black	3.7746	3.41146	3.81868	3.8431	3.05678	0.610851	3.42269	2.2808		At5g14450	GDSL esterase/lipase At5g14450	GeneID:115701062	GO:0005576,GO:0009505,GO:0009506,GO:0016788,GO:0016042	extracellular region|plant-type cell wall|plasmodesma|hydrolase activity, acting on ester bonds|lipid catabolic process
LOC115701093	black	6.92853	7.62608	6.20339	6.28308	8.10149	5.64274	5.49054	6.56877				GeneID:115701093
LOC115701162	black	6.57708	7.60268	6.96296	5.7687	7.03444	6.03358	5.91001	5.82729	POX2	At5g38710	Proline dehydrogenase 2, mitochondrial	GeneID:115701162	GO:0005739,GO:0071949,GO:0004657,GO:0006562,GO:0010133,GO:0006970,GO:0009414	mitochondrion|FAD binding|proline dehydrogenase activity|proline catabolic process|proline catabolic process to glutamate|response to osmotic stress|response to water deprivation	ko00330	Arginine and proline metabolism
LOC115701358	black	8.34072	8.57365	7.47672	7.55874	8.30645	7.23856	7.40117	7.46116	NAP2	Solyc04g00561021	NAC domain-containing protein 2	GeneID:115701358	GO:0005634,GO:0003677,GO:0006355	nucleus|DNA binding|regulation of transcription, DNA-templated
LOC115701395	black	2.65631	2.59089	2.36365	1.58806	2.14678	1.60104	1.09095	2.14093	HVA22I	At5g42560	HVA22-like protein i	GeneID:115701395
LOC115701473	black	2.23641	2.66175	2.70353	3.41048	2.49867	1.67075	3.0237	2.08046	DEGP8	At5g39830	Protease Do-like 8, chloroplastic	GeneID:115701473	GO:0009507,GO:0009534,GO:0009543,GO:0009579,GO:0031977,GO:0008233,GO:0004252,GO:0010206,GO:0006508	chloroplast|chloroplast thylakoid|chloroplast thylakoid lumen|thylakoid|thylakoid lumen|peptidase activity|serine-type endopeptidase activity|photosystem II repair|proteolysis
LOC115701489	black	5.02416	5.34141	4.55428	4.51127	5.35901	3.80362	4.47332	4.98633	NAC100	At5g61430	NAC domain-containing protein 100	GeneID:115701489	GO:0005634,GO:0003677,GO:0003700	nucleus|DNA binding|DNA-binding transcription factor activity
LOC115701498	black	7.9996	8.49228	7.50559	9.09835	7.18662	6.01982	8.02723	7.81765	LIR1	At3g26740	Light-regulated protein 1, chloroplastic	GeneID:115701498	GO:0009507,GO:0009941,GO:0009570,GO:0098807,GO:0007623	chloroplast|chloroplast envelope|chloroplast stroma|chloroplast thylakoid membrane protein complex|circadian rhythm
LOC115701510	black	3.88367	5.09446	4.22821	3.42693	4.82374	4.13637	3.94757	4.21093	GDPD1	At3g02040	Glycerophosphodiester phosphodiesterase GDPD1, chloroplastic	GeneID:115701510	GO:0009507,GO:0009536,GO:0008889,GO:0000287,GO:0030643,GO:0006071,GO:0046475	chloroplast|plastid|glycerophosphodiester phosphodiesterase activity|magnesium ion binding|cellular phosphate ion homeostasis|glycerol metabolic process|glycerophospholipid catabolic process	ko00564	Glycerophospholipid metabolism
LOC115701991	black	2.70862	2.11273	2.78361	2.41496	1.50011	0.416094	1.44876	1.16487	CYP72A14	At3g14680	Cytochrome P450 72A14	GeneID:115701991	GO:0016021,GO:0020037,GO:0005506,GO:0004497,GO:0016705	integral component of membrane|heme binding|iron ion binding|monooxygenase activity|oxidoreductase activity, acting on paired donors, with incorporation or reduction of molecular oxygen
LOC115701996	black	1.39238	1.12662	1.31831	0.613952	0.492262	0	0.151741	0.377796				GeneID:115701996
LOC115702014	black	3.55925	3.94181	3.00446	2.9005	2.92208	1.80794	2.07671	2.59939		At5g39865	Uncharacterized protein At5g39865	GeneID:115702014	GO:0005886,GO:0009055,GO:0015035,GO:0045454	plasma membrane|electron transfer activity|protein disulfide oxidoreductase activity|cell redox homeostasis
LOC115702017	black	4.80564	4.89142	4.20418	3.88401	4.23276	3.04611	3.97809	4.72843	MYB62	At1g68320	Transcription factor MYB62	GeneID:115702017	GO:0005634,GO:0003700,GO:0043565,GO:0016036,GO:0009740,GO:0009686,GO:0010373,GO:0045892,GO:0055062,GO:0009751,GO:0010015	nucleus|DNA-binding transcription factor activity|sequence-specific DNA binding|cellular response to phosphate starvation|gibberellic acid mediated signaling pathway|gibberellin biosynthetic process|negative regulation of gibberellin biosynthetic process|negative regulation of transcription, DNA-templated|phosphate ion homeostasis|response to salicylic acid|root morphogenesis
LOC115702021	black	4.32334	4.0651	3.76751	3.38368	3.64949	3.09588	2.94175	2.9425			Glucan 1,3-beta-glucosidase	GeneID:115702021	GO:0005576,GO:0004338,GO:0005975,GO:0071555	extracellular region|glucan exo-1,3-beta-glucosidase activity|carbohydrate metabolic process|cell wall organization
LOC115702034	black	0.697666	1.79905	0.412583	0.313997	0.115953	0.0594597	0.163286	0		At1g64065	Late embryogenesis abundant protein At1g64065	GeneID:115702034	GO:0016021,GO:0005886	integral component of membrane|plasma membrane
LOC115702225	black	5.172	4.35893	4.82085	5.06249	4.8698	3.73307	5.8377	4.166	BURP17	Os11g0170900	BURP domain-containing protein 17	GeneID:115702225
LOC115702226	black	2.32662	3.97919	3.34995	2.2112	3.01676	0.944037	1.56791	2.69877				GeneID:115702226
LOC115702234	black	2.02263	1.46626	1.96514	1.49356	1.06609	0.492951	0.642202	1.04343	UGT91C1	At5g49690	UDP-glycosyltransferase 91C1	GeneID:115702234	GO:0005829,GO:0043231,GO:0080043,GO:0080044,GO:0008194	cytosol|intracellular membrane-bounded organelle|quercetin 3-O-glucosyltransferase activity|quercetin 7-O-glucosyltransferase activity|UDP-glycosyltransferase activity
LOC115702280	black	2.30069	2.33459	1.94044	1.89287	2.01599	0.460894	0.0339655	1.42933	RLPH2	At3g09970	Tyrosine-protein phosphatase RLPH2	GeneID:115702280
LOC115702372	black	6.177	6.06403	5.7733	5.74107	6.26246	4.79956	5.41621	3.79961				GeneID:115702372
LOC115702389	black	1.98597	2.34015	0.542827	2.28283	2.76819	1.25906	1.57737	1.49482	GRXC11	At3g62950	Glutaredoxin-C11	GeneID:115702389	GO:0005737,GO:0009055,GO:0015035,GO:0045454,GO:0000122	cytoplasm|electron transfer activity|protein disulfide oxidoreductase activity|cell redox homeostasis|negative regulation of transcription by RNA polymerase II
LOC115702441	black	1.30042	0.49737	0.625801	1.35774	1.8223	0.424177	0.847009	0.394415				GeneID:115702441
LOC115702702	black	7.43503	7.32555	7.18407	7.1924	6.94505	6.06955	6.22801	6.32482	SCE1	At3g57870	SUMO-conjugating enzyme SCE1	GeneID:115702702	GO:0005634,GO:0005524,GO:0019900,GO:0061656,GO:0019789,GO:0009793,GO:0016925,GO:0009737	nucleus|ATP binding|kinase binding|SUMO conjugating enzyme activity|SUMO transferase activity|embryo development ending in seed dormancy|protein sumoylation|response to abscisic acid	ko03013,ko04120	RNA transport|Ubiquitin mediated proteolysis
LOC115702751	black	2.8569	3.23765	3.36924	2.519	2.48251	1.76642	1.92592	1.72937	CAD		Probable cinnamyl alcohol dehydrogenase	GeneID:115702751	GO:0045551,GO:0052747,GO:0008270,GO:0009809	cinnamyl-alcohol dehydrogenase activity|sinapyl alcohol dehydrogenase activity|zinc ion binding|lignin biosynthetic process	ko00940	Phenylpropanoid biosynthesis
LOC115702755	black	3.00591	3.79913	2.05287	1.41657	1.27776	2.58823	1.58491	2.05893				GeneID:115702755
LOC115702761	black	6.73499	6.59786	7.25481	7.15181	6.24928	5.29174	6.39832	6.4151	CYP81Q32		Cytochrome P450 81Q32	GeneID:115702761
LOC115702765	black	6.41476	6.46964	7.08605	6.75181	6.09308	5.09647	6.09105	5.76435	CYP81Q32		Cytochrome P450 81Q32	GeneID:115702765
LOC115702935	black	6.61075	7.20747	6.34639	6.55528	7.0717	5.40954	5.98685	6.06917	MCCB	At4g34030	Methylcrotonoyl-CoA carboxylase beta chain, mitochondrial	GeneID:115702935	GO:1905202,GO:0005759,GO:0005739,GO:0005524,GO:0050897,GO:0004485,GO:0008270,GO:0006552	methylcrotonoyl-CoA carboxylase complex|mitochondrial matrix|mitochondrion|ATP binding|cobalt ion binding|methylcrotonoyl-CoA carboxylase activity|zinc ion binding|leucine catabolic process	ko00280	Valine, leucine and isoleucine degradation
LOC115702949	black	5.21128	5.23765	4.65251	5.01337	4.32663	3.71023	3.69472	3.93493	WSD1	At5g37300	O-acyltransferase WSD1	GeneID:115702949	GO:0005783,GO:0005789,GO:0016021,GO:0005886,GO:0102966,GO:0004144,GO:0047196,GO:0103095,GO:0019432,GO:0010025	endoplasmic reticulum|endoplasmic reticulum membrane|integral component of membrane|plasma membrane|arachidoyl-CoA:1-dodecanol O-acyltransferase activity|diacylglycerol O-acyltransferase activity|long-chain-alcohol O-fatty-acyltransferase activity|wax ester synthase activity|triglyceride biosynthetic process|wax biosynthetic process
LOC115702971	black	4.7705	4.9042	4.69994	4.86802	3.96847	2.96232	3.30884	3.48778	PTEN2A	At3g19420	Phosphatidylinositol 3,4,5-trisphosphate 3-phosphatase and protein-tyrosine-phosphatase PTEN2A	GeneID:115702971	GO:0005829,GO:0070300,GO:0052866,GO:0016314,GO:0004725,GO:0008138,GO:0035335,GO:0046856,GO:0006970,GO:0009651	cytosol|phosphatidic acid binding|phosphatidylinositol phosphate phosphatase activity|phosphatidylinositol-3,4,5-trisphosphate 3-phosphatase activity|protein tyrosine phosphatase activity|protein tyrosine/serine/threonine phosphatase activity|peptidyl-tyrosine dephosphorylation|phosphatidylinositol dephosphorylation|response to osmotic stress|response to salt stress	ko00562,ko04070	Inositol phosphate metabolism|Phosphatidylinositol signaling system
LOC115702972	black	3.94746	4.19267	4.19931	3.75602	3.42326	2.15616	2.77102	2.84579	PGDH1	At4g34200	D-3-phosphoglycerate dehydrogenase 1, chloroplastic	GeneID:115702972	GO:0009507,GO:0009570,GO:0016020,GO:0005739,GO:0009536,GO:0005524,GO:0051287,GO:0004617,GO:0009793,GO:0006564,GO:0009561,GO:0009555	chloroplast|chloroplast stroma|membrane|mitochondrion|plastid|ATP binding|NAD binding|phosphoglycerate dehydrogenase activity|embryo development ending in seed dormancy|L-serine biosynthetic process|megagametogenesis|pollen development	ko00260,ko00270	Glycine, serine and threonine metabolism|Cysteine and methionine metabolism
LOC115702973	black	3.46368	3.299	3.18076	3.44773	3.34038	0.159058	2.30513	2.35942	NHD1	At3g19490	Sodium/proton antiporter 1	GeneID:115702973	GO:0009941,GO:0031969,GO:0016021,GO:0015297,GO:0050833,GO:0006848,GO:0009651,GO:0006814	chloroplast envelope|chloroplast membrane|integral component of membrane|antiporter activity|pyruvate transmembrane transporter activity|pyruvate transport|response to salt stress|sodium ion transport
LOC115702975	black	2.67423	2.86608	2.71211	2.59006	1.99765	0	2.75376	1.88395		At3g19440	RNA pseudouridine synthase 4, mitochondrial	GeneID:115702975	GO:0005739,GO:0009982,GO:0003723,GO:0001522	mitochondrion|pseudouridine synthase activity|RNA binding|pseudouridine synthesis
LOC115702981	black	6.69803	6.79083	6.36542	6.18929	6.40185	0.413833	5.04533	5.51507	RD21A	At1g47128	Cysteine proteinase RD21A	GeneID:115702981	GO:0048046,GO:0009507,GO:0010494,GO:0005615,GO:0005794,GO:0005764,GO:0000932,GO:0009506,GO:0005773,GO:0004197,GO:0008234,GO:0008233,GO:0050832,GO:0006508,GO:0051603	apoplast|chloroplast|cytoplasmic stress granule|extracellular space|Golgi apparatus|lysosome|P-body|plasmodesma|vacuole|cysteine-type endopeptidase activity|cysteine-type peptidase activity|peptidase activity|defense response to fungus|proteolysis|proteolysis involved in cellular protein catabolic process
LOC115702983	black	2.79845	2.98523	3.143	2.92401	2.87379	0.0733676	2.64386	2.02669	MTK	At1g49820	Methylthioribose kinase	GeneID:115702983	GO:0005829,GO:0005524,GO:0042802,GO:0046522,GO:0071369,GO:0071281,GO:0071732,GO:0019509	cytosol|ATP binding|identical protein binding|S-methyl-5-thioribose kinase activity|cellular response to ethylene stimulus|cellular response to iron ion|cellular response to nitric oxide|L-methionine salvage from methylthioadenosine	ko00270	Cysteine and methionine metabolism
LOC115702984	black	4.38866	4.22547	4.31545	4.31867	4.40225	2.10934	4.3062	3.50363	LIP1	At2g15230	Triacylglycerol lipase 1	GeneID:115702984	GO:0005615,GO:0016298,GO:0004806,GO:0044255,GO:0016042	extracellular space|lipase activity|triglyceride lipase activity|cellular lipid metabolic process|lipid catabolic process	ko00100	Steroid biosynthesis
LOC115702989	black	3.126	3.20934	3.31019	3.3739	3.22968	0.20767	3.09391	2.46337	TIC21	At2g15290	Protein TIC 21, chloroplastic	GeneID:115702989	GO:0009507,GO:0009941,GO:0009706,GO:0016021,GO:0042803,GO:0006875,GO:0045037	chloroplast|chloroplast envelope|chloroplast inner membrane|integral component of membrane|protein homodimerization activity|cellular metal ion homeostasis|protein import into chloroplast stroma
LOC115702992	black	2.14011	2.34447	3.08923	2.36754	2.18396	0.0716349	2.28998	2.91533	mug16		Protein GMH1 homolog	GeneID:115702992	GO:0005783,GO:0005789,GO:0000139,GO:0030173,GO:0051321	endoplasmic reticulum|endoplasmic reticulum membrane|Golgi membrane|integral component of Golgi membrane|meiotic cell cycle
LOC115702993	black	3.00548	3.27364	2.43873	2.62804	2.70297	0	2.23397	2.58474	MYB73	At4g37260	Transcription factor MYB73	GeneID:115702993	GO:0005634,GO:0003700,GO:0043565,GO:0044212,GO:0019760,GO:1901001,GO:0010929,GO:0006355,GO:0009737,GO:0046686,GO:0010200,GO:0009723,GO:0009753,GO:0009751	nucleus|DNA-binding transcription factor activity|sequence-specific DNA binding|transcription regulatory region DNA binding|glucosinolate metabolic process|negative regulation of response to salt stress|positive regulation of auxin mediated signaling pathway|regulation of transcription, DNA-templated|response to abscisic acid|response to cadmium ion|response to chitin|response to ethylene|respons…
LOC115702994	black	3.21384	2.58263	2.73817	2.32944	1.50979	0.301274	2.38563	2.31243			Basic secretory protease	GeneID:115702994	GO:0046872,GO:0008237	metal ion binding|metallopeptidase activity
LOC115702997	black	3.6162	3.55099	3.69171	3.35839	3.29498	0	3.61112	2.6468	RTNLB11	At3g19460	Reticulon-like protein B11	GeneID:115702997	GO:0005789,GO:0016021	endoplasmic reticulum membrane|integral component of membrane
LOC115703000	black	3.12386	3.46598	3.19588	3.37268	3.45101	0.0543977	3.35465	2.79506				GeneID:115703000
LOC115703030	black	4.54246	4.52536	4.42833	4.48693	5.25589	0.0697346	2.51137	3.59487	TIP41L	At4g34270	TIP41-like protein	GeneID:115703030	GO:0005829,GO:0007165,GO:0031929	cytosol|signal transduction|TOR signaling
LOC115703056	black	4.42599	4.41234	4.27152	4.4187	5.32589	2.61761	2.81574	4.67755	RHY1A	At1g49850	Probable E3 ubiquitin-protein ligase RHY1A	GeneID:115703056	GO:0046872,GO:0016740,GO:0016567	metal ion binding|transferase activity|protein ubiquitination
LOC115703084	black	6.30878	6.49156	5.43267	5.47972	6.13644	4.971	5.58273	6.41				GeneID:115703084
LOC115703142	black	3.60088	3.53315	2.7541	3.52837	4.07377	2.31082	0.934908	1.84706	WLIM1	At1g10200	LIM domain-containing protein WLIM1	GeneID:115703142	GO:0005737,GO:0005856,GO:0005886,GO:0051015,GO:0046872,GO:0003729,GO:0051017	cytoplasm|cytoskeleton|plasma membrane|actin filament binding|metal ion binding|mRNA binding|actin filament bundle assembly
LOC115703215	black	6.82179	7.31253	6.2379	6.74606	6.81567	5.32941	6.142	6.14104	MEE14	At2g15890	CCG-binding protein 1	GeneID:115703215	GO:0009507,GO:0005829,GO:0005634,GO:0036033,GO:0050832,GO:0009793,GO:0010183	chloroplast|cytosol|nucleus|mediator complex binding|defense response to fungus|embryo development ending in seed dormancy|pollen tube guidance
LOC115703705	black	3.03263	2.93688	2.94335	3.09977	3.54766	0	3.27067	2.9915	DBR		2-alkenal reductase (NADP(+)-dependent)	GeneID:115703705	GO:0016491	oxidoreductase activity
LOC115703797	black	3.26596	1.72058	2.01442	1.75506	1.59055	0.040526	0.0943924	1.9483	SULTR3;5	At5g19600	Probable sulfate transporter 3.5	GeneID:115703797	GO:0016021,GO:0015301,GO:0008271,GO:0015116,GO:0015293	integral component of membrane|anion:anion antiporter activity|secondary active sulfate transmembrane transporter activity|sulfate transmembrane transporter activity|symporter activity
LOC115703804	black	3.89593	3.93189	3.84518	3.75377	4.00414	2.91498	2.69127	3.24989	SUVR1	At1g04050	Probable inactive histone-lysine N-methyltransferase SUVR1	GeneID:115703804	GO:0005694,GO:0005730,GO:0018024,GO:0042802,GO:0008270,GO:0031047	chromosome|nucleolus|histone-lysine N-methyltransferase activity|identical protein binding|zinc ion binding|gene silencing by RNA
LOC115703827	black	5.76105	5.55617	5.72962	5.63916	6.15916	2.76256	2.82286	5.11296				GeneID:115703827
LOC115703867	black	5.49353	5.55191	4.9707	5.47895	5.81054	4.19184	5.58755	4.99064	ATG8F	At4g16520	Autophagy-related protein 8f	GeneID:115703867	GO:0000421,GO:0031410,GO:0005874,GO:0006914,GO:0006995,GO:0015031	autophagosome membrane|cytoplasmic vesicle|microtubule|autophagy|cellular response to nitrogen starvation|protein transport	ko04136	Autophagy - other
LOC115703914	black	5.23554	4.90665	5.68382	4.97048	5.91091	3.93329	4.59464	4.17665	SAUR76	At5g20820	Auxin-responsive protein SAUR76	GeneID:115703914	GO:0005737,GO:0019897,GO:0005634,GO:0009873,GO:0007275,GO:0030307,GO:0009733	cytoplasm|extrinsic component of plasma membrane|nucleus|ethylene-activated signaling pathway|multicellular organism development|positive regulation of cell growth|response to auxin
LOC115704012	black	7.4646	8.42508	7.0915	7.26363	7.88834	5.82651	6.50581	6.91573	MCCA		Methylcrotonoyl-CoA carboxylase subunit alpha, mitochondrial	GeneID:115704012	GO:0005759,GO:0005524,GO:0046872,GO:0004485,GO:0006552	mitochondrial matrix|ATP binding|metal ion binding|methylcrotonoyl-CoA carboxylase activity|leucine catabolic process	ko00280	Valine, leucine and isoleucine degradation
LOC115704022	black	3.76666	4.46662	2.697	3.51451	3.73658	3.04387	2.69954	3.78259	STS1		Stachyose synthase	GeneID:115704022	GO:0005737,GO:0047268,GO:0009312,GO:0033532	cytoplasm|galactinol-raffinose galactosyltransferase activity|oligosaccharide biosynthetic process|stachyose biosynthetic process	ko00052	Galactose metabolism
LOC115704132	black	2.53076	2.78421	2.71341	1.83252	3.31457	1.28725	1.37803	2.53107	IOS1	At1g51800	LRR receptor-like serine/threonine-protein kinase IOS1	GeneID:115704132	GO:0016021,GO:0005886,GO:0090406,GO:0005524,GO:0042802,GO:0042803,GO:0004674,GO:0009738,GO:0002229,GO:0009788,GO:1902289,GO:1900426,GO:2000071,GO:1900150,GO:0010200,GO:0009620,GO:0002237,GO:0002238,GO:0002239	integral component of membrane|plasma membrane|pollen tube|ATP binding|identical protein binding|protein homodimerization activity|protein serine/threonine kinase activity|abscisic acid-activated signaling pathway|defense response to oomycetes|negative regulation of abscisic acid-activated signaling pathway|negative regulation of defense response to oomycetes|positive regulation of defense respon…
LOC115704192	black	6.37469	6.8384	5.58362	4.93392	5.48971	4.71354	5.17213	5.17362	KPI104		Kunitz type trypsin inhibitor 104	GeneID:115704192
LOC115704205	black	1.95051	2.28034	2.14547	2.13142	2.93147	0.200312	0.234815	2.19475	UGT709C2		7-deoxyloganetic acid glucosyltransferase	GeneID:115704205	GO:0102970,GO:0035251,GO:1900994	7-deoxyloganetic acid glucosyltransferase activity|UDP-glucosyltransferase activity|(-)-secologanin biosynthetic process
LOC115704311	black	4.95235	4.98249	4.98999	4.89521	3.91719	2.52597	4.23733	3.25745	PNSL4	At4g39710	Photosynthetic NDH subunit of lumenal location 4, chloroplastic	GeneID:115704311	GO:0009507,GO:0009543,GO:0009535,GO:0009579,GO:0003755	chloroplast|chloroplast thylakoid lumen|chloroplast thylakoid membrane|thylakoid|peptidyl-prolyl cis-trans isomerase activity
LOC115704523	black	8.43126	9.11989	7.77767	8.47737	9.62635	7.19314	8.10775	7.77547	ATJ11	At4g36040	Chaperone protein dnaJ 11, chloroplastic	GeneID:115704523	GO:0009507,GO:0009570,GO:0005634,GO:0009536	chloroplast|chloroplast stroma|nucleus|plastid
LOC115704577	black	3.46928	3.82843	2.84357	3.42058	3.15665	2.62893	1.87106	2.97877	KOB1	Os02g0817500	Probable voltage-gated potassium channel subunit beta	GeneID:115704577	GO:0005244,GO:0006813,GO:0034765	voltage-gated ion channel activity|potassium ion transport|regulation of ion transmembrane transport
LOC115704586	black	4.57915	5.10903	4.31198	3.64856	3.77036	3.15998	3.50301	3.85805				GeneID:115704586
LOC115704626	black	8.65064	8.89379	8.00867	8.56128	8.96987	7.58475	8.20756	7.60334		At1g80440	F-box/kelch-repeat protein At1g80440	GeneID:115704626	GO:0005829,GO:0019005,GO:0080037,GO:2000762	cytosol|SCF ubiquitin ligase complex|negative regulation of cytokinin-activated signaling pathway|regulation of phenylpropanoid metabolic process
LOC115704640	black	4.45192	4.10209	4.48379	4.79271	4.92237	2.78105	2.43433	3.75402	HST	At5g48930	Shikimate O-hydroxycinnamoyltransferase	GeneID:115704640	GO:0005737,GO:0005829,GO:0016020,GO:0047205,GO:0047172,GO:0010252,GO:0071555,GO:0009809,GO:0009963	cytoplasm|cytosol|membrane|quinate O-hydroxycinnamoyltransferase activity|shikimate O-hydroxycinnamoyltransferase activity|auxin homeostasis|cell wall organization|lignin biosynthetic process|positive regulation of flavonoid biosynthetic process	ko00940,ko00941,ko00945	Phenylpropanoid biosynthesis|Flavonoid biosynthesis|Stilbenoid, diarylheptanoid and gingerol biosynthesis
LOC115704701	black	3.09877	3.45056	2.96817	3.16556	3.76505	0	0.0771086	2.62335				GeneID:115704701
LOC115704783	black	2.17766	2.03833	0.993966	1.41397	2.16969	0	0.683082	0.936518	GT7		UDP-glucose flavonoid 3-O-glucosyltransferase 7	GeneID:115704783	GO:0102360,GO:0047893,GO:0102425	daphnetin 3-O-glucosyltransferase activity|flavonol 3-O-glucosyltransferase activity|myricetin 3-O-glucosyltransferase activity	ko00940	Phenylpropanoid biosynthesis
LOC115704851	black	4.67407	4.91117	4.08114	4.92285	4.83647	3.30645	3.85111	3.92405	HLS1	At4g37580	Probable N-acetyltransferase HLS1	GeneID:115704851	GO:0008080,GO:0016747,GO:0009734,GO:0009640,GO:0040008,GO:0009723,GO:0009826	N-acetyltransferase activity|transferase activity, transferring acyl groups other than amino-acyl groups|auxin-activated signaling pathway|photomorphogenesis|regulation of growth|response to ethylene|unidimensional cell growth
LOC115704873	black	3.37407	3.50095	2.78534	1.8827	2.07352	1.99866	2.64421	1.89022	MOB1A	At5g45550	MOB kinase activator-like 1A	GeneID:115704873	GO:0005737,GO:0005769,GO:0005634,GO:0009705,GO:0005886,GO:0005802,GO:0046872,GO:0051301,GO:0008283,GO:0009553,GO:0048229,GO:0009554,GO:0009556,GO:0035265,GO:0048364,GO:0010449	cytoplasm|early endosome|nucleus|plant-type vacuole membrane|plasma membrane|trans-Golgi network|metal ion binding|cell division|cell proliferation|embryo sac development|gametophyte development|megasporogenesis|microsporogenesis|organ growth|root development|root meristem growth
LOC115704901	black	3.85895	4.53837	3.56136	3.41772	3.73091	2.85382	3.28892	2.89208	OFP8	At5g19650	Transcription repressor OFP8	GeneID:115704901	GO:0005634,GO:0045892	nucleus|negative regulation of transcription, DNA-templated
LOC115704926	black	3.59761	2.91849	3.39276	3.25567	3.98748	2.41678	2.56955	3.11991				GeneID:115704926
LOC115704961	black	4.30724	3.42169	4.78785	4.43674	4.032	2.84345	2.08025	3.85966	ERF003	At5g25190	Ethylene-responsive transcription factor ERF003	GeneID:115704961	GO:0005634,GO:0003677,GO:0003700,GO:0009873	nucleus|DNA binding|DNA-binding transcription factor activity|ethylene-activated signaling pathway
LOC115704987	black	2.94106	2.95626	3.17423	3.05821	3.73633	0.140701	0.175903	2.67052	usp106		U1 snRNP-associated protein usp106	GeneID:115704987	GO:0005829,GO:0005634,GO:0005685,GO:0071004,GO:0003729,GO:0000395,GO:0006376	cytosol|nucleus|U1 snRNP|U2-type prespliceosome|mRNA binding|mRNA 5'-splice site recognition|mRNA splice site selection
LOC115705015	black	3.27867	3.05087	3.40182	2.9131	3.05438	0.265264	0.545893	2.55987	PP16-1	At3g55470	16 kDa phloem protein 1	GeneID:115705015
LOC115705026	black	8.28412	7.21968	8.54126	8.35156	8.64541	6.8605	6.53795	6.4154	EXPA8	At2g40610	Expansin-A8	GeneID:115705026
LOC115705056	black	1.01688	1.32843	0.935298	0.733487	0.399789	0	0	0.165925	ALDH2C4	At3g24503	Aldehyde dehydrogenase family 2 member C4	GeneID:115705056	GO:0005829,GO:0004029,GO:0050269,GO:0043878,GO:0009699	cytosol|aldehyde dehydrogenase (NAD) activity|coniferyl-aldehyde dehydrogenase activity|glyceraldehyde-3-phosphate dehydrogenase (NAD+) (non-phosphorylating) activity|phenylpropanoid biosynthetic process	ko00940	Phenylpropanoid biosynthesis
LOC115705088	black	2.31397	2.09283	1.94929	3.28747	2.14201	0.710613	1.66889	1.93915	RD19D	At3g54940	Probable cysteine protease RD19D	GeneID:115705088	GO:0005615,GO:0005764,GO:0004197,GO:0051603	extracellular space|lysosome|cysteine-type endopeptidase activity|proteolysis involved in cellular protein catabolic process	ko04626	Plant-pathogen interaction
LOC115705117	black	2.72658	3.66347	2.41154	1.92323	3.3466	1.45961	1.62159	1.52766	CIPK2	Os07g0678600	CBL-interacting protein kinase 2	GeneID:115705117	GO:0005524,GO:0004674,GO:0007165	ATP binding|protein serine/threonine kinase activity|signal transduction
LOC115705132	black	5.44487	5.88698	4.70826	4.03629	4.91782	3.92809	4.8418	4.60447				GeneID:115705132
LOC115705163	black	4.85802	5.11716	4.59759	4.58607	4.66186	3.22569	3.36232	4.80467	RSH3	At1g54130	Probable GTP diphosphokinase RSH3, chloroplastic	GeneID:115705163	GO:0009507,GO:0005524,GO:0005525,GO:0008728,GO:0016301,GO:0015970,GO:0010150,GO:0015979	chloroplast|ATP binding|GTP binding|GTP diphosphokinase activity|kinase activity|guanosine tetraphosphate biosynthetic process|leaf senescence|photosynthesis	ko00230	Purine metabolism
LOC115705166	black	4.98189	5.74021	4.30806	4.53681	6.24252	3.53333	4.17064	3.67838				GeneID:115705166
LOC115705299	black	6.44549	7.11879	5.73179	6.16184	6.47695	5.10219	6.21228	5.84592	SUD1	At4g34100	Probable E3 ubiquitin ligase SUD1	GeneID:115705299	GO:0030176,GO:0004842,GO:0008270,GO:0042335,GO:0010143,GO:0008299,GO:1900490,GO:0009414,GO:0010345,GO:0030433,GO:0010025	integral component of endoplasmic reticulum membrane|ubiquitin-protein transferase activity|zinc ion binding|cuticle development|cutin biosynthetic process|isoprenoid biosynthetic process|positive regulation of hydroxymethylglutaryl-CoA reductase (NADPH) activity|response to water deprivation|suberin biosynthetic process|ubiquitin-dependent ERAD pathway|wax biosynthetic process
LOC115705307	black	3.61135	3.63018	3.44541	3.45445	3.47652	0.101682	3.42497	3.43613	psi1		Protein psi1	GeneID:115705307	GO:0005829,GO:0005634,GO:0051087,GO:0030544,GO:0051082,GO:0051085,GO:0002183,GO:0006413	cytosol|nucleus|chaperone binding|Hsp70 protein binding|unfolded protein binding|chaperone cofactor-dependent protein refolding|cytoplasmic translational initiation|translational initiation
LOC115705320	black	5.51982	5.96458	4.62638	4.3166	4.7273	3.7014	4.3864	5.06718		At1g79990	Coatomer subunit beta'-1	GeneID:115705320	GO:0030126,GO:0005829,GO:0000139,GO:0005198,GO:0006888,GO:0006891,GO:0006886,GO:0006890	COPI vesicle coat|cytosol|Golgi membrane|structural molecule activity|ER to Golgi vesicle-mediated transport|intra-Golgi vesicle-mediated transport|intracellular protein transport|retrograde vesicle-mediated transport, Golgi to ER
LOC115705335	black	6.51882	6.19428	6.43446	6.42946	6.23864	4.82979	5.54359	5.66864	PBD1	At3g22630	Proteasome subunit beta type-2-A	GeneID:115705335	GO:0048046,GO:0005737,GO:0005829,GO:0005634,GO:0005886,GO:0000502,GO:0005839,GO:0019774,GO:0005774,GO:0005773,GO:0004175,GO:0004298,GO:0010498,GO:0010499,GO:0043161	apoplast|cytoplasm|cytosol|nucleus|plasma membrane|proteasome complex|proteasome core complex|proteasome core complex, beta-subunit complex|vacuolar membrane|vacuole|endopeptidase activity|threonine-type endopeptidase activity|proteasomal protein catabolic process|proteasomal ubiquitin-independent protein catabolic process|proteasome-mediated ubiquitin-dependent protein catabolic process	ko03050	Proteasome
LOC115705365	black	4.06927	4.86858	2.99288	3.02668	4.24183	2.54651	2.48465	3.29113				GeneID:115705365
LOC115705393	black	4.02212	3.97924	3.86586	4.04713	3.82265	2.09123	2.08944	3.2445		Os06g0143900	Coatomer subunit beta'-1	GeneID:115705393	GO:0030126,GO:0000139,GO:0005198,GO:0006888,GO:0006891,GO:0006886,GO:0006890	COPI vesicle coat|Golgi membrane|structural molecule activity|ER to Golgi vesicle-mediated transport|intra-Golgi vesicle-mediated transport|intracellular protein transport|retrograde vesicle-mediated transport, Golgi to ER
LOC115705409	black	2.62067	2.6924	2.69181	2.68289	1.79423	0.977613	2.17266	1.49078		At5g56730	Zinc protease PQQL-like	GeneID:115705409	GO:0009507,GO:0005739,GO:0009536,GO:0046872,GO:0004222	chloroplast|mitochondrion|plastid|metal ion binding|metalloendopeptidase activity
LOC115705444	black	5.22225	5.85498	4.64205	4.08798	4.39146	3.43385	3.57124	4.00881	GDHA		Glutamate dehydrogenase A	GeneID:115705444	GO:0004353,GO:0006520	glutamate dehydrogenase [NAD(P)+] activity|cellular amino acid metabolic process	ko00220,ko00250,ko00910	Arginine biosynthesis|Alanine, aspartate and glutamate metabolism|Nitrogen metabolism
LOC115705472	black	3.05921	3.02467	3.20557	2.71634	2.61509	1.41621	1.03999	2.36888	ASIL2	At3g14180	Trihelix transcription factor ASIL2	GeneID:115705472	GO:0005634,GO:0003700,GO:0043565,GO:0044212,GO:0009793,GO:0006355,GO:0010431	nucleus|DNA-binding transcription factor activity|sequence-specific DNA binding|transcription regulatory region DNA binding|embryo development ending in seed dormancy|regulation of transcription, DNA-templated|seed maturation
LOC115705514	black	4.30896	4.30309	4.31099	4.08016	3.08654	1.81227	3.23064	2.80792	APS1		Acid phosphatase 1	GeneID:115705514	GO:0003993	acid phosphatase activity
LOC115705610	black	3.82993	4.0014	2.83827	3.12847	2.92151	2.5237	2.91642	2.52379	PMEI9	At1g62770	Pectinesterase inhibitor 9	GeneID:115705610	GO:0048046,GO:0004857,GO:0046910,GO:0043086	apoplast|enzyme inhibitor activity|pectinesterase inhibitor activity|negative regulation of catalytic activity
LOC115705668	black	4.42237	4.44913	4.18997	4.38818	3.68894	2.92153	3.03256	3.14773		At5g13980	Probable alpha-mannosidase At5g13980	GeneID:115705668	GO:0048046,GO:0005618,GO:0009505,GO:0005774,GO:0005773,GO:0004559,GO:0030246,GO:0046872,GO:0006013,GO:0006517	apoplast|cell wall|plant-type cell wall|vacuolar membrane|vacuole|alpha-mannosidase activity|carbohydrate binding|metal ion binding|mannose metabolic process|protein deglycosylation	ko00511	Other glycan degradation
LOC115705779	black	6.89857	7.15969	6.33175	6.52683	6.1566	4.6004	4.74226	6.49063	DIVARICATA		Transcription factor DIVARICATA	GeneID:115705779	GO:0005634,GO:0003677,GO:0048262,GO:0009908	nucleus|DNA binding|determination of dorsal/ventral asymmetry|flower development
LOC115705851	black	5.71675	6.17696	5.26752	5.56118	5.08776	4.52309	5.04215	4.86778	PECS-2.1		Pectinesterase 2	GeneID:115705851	GO:0005618,GO:0005576,GO:0045330,GO:0004857,GO:0030599,GO:0042545,GO:0045490	cell wall|extracellular region|aspartyl esterase activity|enzyme inhibitor activity|pectinesterase activity|cell wall modification|pectin catabolic process	ko00040	Pentose and glucuronate interconversions
LOC115705868	black	0.241163	1.85642	0.961121	0.352108	0.771998	0.461205	0.212807	0.80797	COPT6	At2g26975	Copper transporter 6	GeneID:115705868	GO:0016021,GO:0005773,GO:0005375	integral component of membrane|vacuole|copper ion transmembrane transporter activity
LOC115705878	black	4.68509	6.22852	4.18543	4.8555	4.79698	2.16242	3.7742	3.75452			Beta-galactosidase	GeneID:115705878	GO:0048046,GO:0004565,GO:0005975	apoplast|beta-galactosidase activity|carbohydrate metabolic process
LOC115705880	black	3.3698	3.01164	3.12727	2.84225	2.56918	1.70152	2.4081	1.79973				GeneID:115705880
LOC115705881	black	7.15419	7.12943	7.30625	6.98232	6.71445	5.81985	6.62653	6.14514	RPL31		60S ribosomal protein L31	GeneID:115705881	GO:0005840,GO:0003735,GO:0006412	ribosome|structural constituent of ribosome|translation	ko03010	Ribosome
LOC115705885	black	2.16379	2.16274	1.84615	2.04175	1.64461	0	3.09741	1.88025				GeneID:115705885
LOC115705964	black	3.12472	3.35009	3.71987	3.21452	2.32992	1.2232	2.40102	1.42777				GeneID:115705964
LOC115705965	black	1.44041	1.90439	1.3991	1.13324	0.904111	0.524157	0.368643	1.6475				GeneID:115705965
LOC115705967	black	2.20175	1.75535	2.14142	1.99607	0.828838	0.203851	1.50179	0.584973				GeneID:115705967
LOC115706092	black	4.76399	4.94002	5.12669	4.94133	4.85321	0.476221	0.193742	3.88053	ADE16	YLR028C	IMP cyclohydrolase	GeneID:115706092	GO:0005829,GO:0003937,GO:0004643,GO:0006189,GO:0009060,GO:0030437,GO:0006164	cytosol|IMP cyclohydrolase activity|phosphoribosylaminoimidazolecarboxamide formyltransferase activity|'de novo' IMP biosynthetic process|aerobic respiration|ascospore formation|purine nucleotide biosynthetic process	ko00230,ko00670	Purine metabolism|One carbon pool by folate
LOC115706099	black	2.78695	3.11716	2.76584	3.07122	2.95438	0.0347423	0.016596	2.0179			Probable tRNA(Ile)-lysidine synthase	GeneID:115706099	GO:0005739,GO:0005524,GO:0032267,GO:0032543,GO:0002127	mitochondrion|ATP binding|tRNA(Ile)-lysidine synthase activity|mitochondrial translation|tRNA wobble base cytosine methylation
LOC115706100	black	3.00011	2.97476	3.02335	3.17682	3.8757	2.06375	1.94727	2.88998	SYM1		Protein SYM1	GeneID:115706100	GO:0016021,GO:0005743	integral component of membrane|mitochondrial inner membrane	ko04146	Peroxisome
LOC115706144	black	7.80071	8.34657	7.3711	7.67415	8.37005	6.68233	7.26107	7.32173				GeneID:115706144
LOC115706156	black	4.87721	4.72086	4.53681	4.64009	5.26869	3.66859	3.32114	3.57614	ATC401	At5g21222	Pentatricopeptide repeat-containing protein At5g21222	GeneID:115706156
LOC115706330	black	2.90961	2.81666	3.45654	2.96118	3.51337	0.0926215	2.41777	1.87257		At3g19508	LYR motif-containing protein At3g19508	GeneID:115706330
LOC115706478	black	9.08216	9.511	9.1524	9.27365	9.28133	8.15047	8.23089	8.57709			Aldehyde dehydrogenase family 7 member A1	GeneID:115706478	GO:0004029,GO:0043878,GO:0006081	aldehyde dehydrogenase (NAD) activity|glyceraldehyde-3-phosphate dehydrogenase (NAD+) (non-phosphorylating) activity|cellular aldehyde metabolic process	ko00010,ko00053,ko00071,ko00260,ko00280,ko00310,ko00330,ko00340,ko00380,ko00410,ko00561,ko00620	Glycolysis / Gluconeogenesis|Ascorbate and aldarate metabolism|Fatty acid degradation|Glycine, serine and threonine metabolism|Valine, leucine and isoleucine degradation|Lysine degradation|Arginine and proline metabolism|Histidine metabolism|Tryptophan metabolism|beta-Alanine metabolism|Glycerolipid metabolism|Pyruvate metabolism
LOC115706500	black	2.71335	3.17356	2.58883	3.76453	3.79561	0.812668	1.37766	2.5905				GeneID:115706500
LOC115706562	black	1.34431	0.773968	1.43992	1.56386	1.30836	0.156021	0.0385862	0.708485	DYN2	DEHA2A01672g	Dynein light chain 1, cytoplasmic	GeneID:115706562	GO:0005868,GO:0005881,GO:0005643,GO:1990429,GO:0005777,GO:0008574,GO:0040001,GO:0030473,GO:0051292,GO:2000582	cytoplasmic dynein complex|cytoplasmic microtubule|nuclear pore|peroxisomal importomer complex|peroxisome|ATP-dependent microtubule motor activity, plus-end-directed|establishment of mitotic spindle localization|nuclear migration along microtubule|nuclear pore complex assembly|positive regulation of ATP-dependent microtubule motor activity, plus-end-directed
LOC115706637	black	3.6772	3.78603	3.74741	3.85377	4.20734	2.29776	2.92043	3.47413	ARP5	At3g12380	Actin-related protein 5	GeneID:115706637	GO:0005737,GO:0005654,GO:0005634,GO:0005200,GO:0030029,GO:0006281,GO:0007275,GO:0080036,GO:0010082	cytoplasm|nucleoplasm|nucleus|structural constituent of cytoskeleton|actin filament-based process|DNA repair|multicellular organism development|regulation of cytokinin-activated signaling pathway|regulation of root meristem growth
LOC115706679	black	1.32953	1.47309	1.95178	1.37417	0.95282	0.129718	0.181389	0.567689				GeneID:115706679
LOC115706828	black	5.28041	5.4275	5.24789	4.79022	4.41438	3.92502	4.40102	5.0252		At1g53430	Probable LRR receptor-like serine/threonine-protein kinase At1g53430	GeneID:115706828
LOC115706938	black	0.828437	1.39088	0.976445	1.55848	0.950767	0	0	0.413823	SRG1	At1g17020	Protein SRG1	GeneID:115706938	GO:0051213,GO:0046872,GO:0016682,GO:0010150	dioxygenase activity|metal ion binding|oxidoreductase activity, acting on diphenols and related substances as donors, oxygen as acceptor|leaf senescence
LOC115706940	black	5.54862	6.87652	5.57318	5.32883	5.85803	5.09903	5.44773	5.19408	BGAL1	At3g13750	Beta-galactosidase 1	GeneID:115706940	GO:0048046,GO:0005618,GO:0009505,GO:0009506,GO:0005773,GO:0004565,GO:0030246,GO:0005975	apoplast|cell wall|plant-type cell wall|plasmodesma|vacuole|beta-galactosidase activity|carbohydrate binding|carbohydrate metabolic process
LOC115706971	black	1.86265	1.88866	2.33381	2.47243	2.34666	0.134657	0.38912	1.35605	NFYB6	At5g47670	Nuclear transcription factor Y subunit B-6	GeneID:115706971	GO:0005634,GO:0033613,GO:0003700,GO:0046982,GO:0043565,GO:0009738,GO:0045893,GO:0006355	nucleus|activating transcription factor binding|DNA-binding transcription factor activity|protein heterodimerization activity|sequence-specific DNA binding|abscisic acid-activated signaling pathway|positive regulation of transcription, DNA-templated|regulation of transcription, DNA-templated
LOC115707039	black	5.77091	3.90202	6.12175	6.68674	5.50594	0	0.0595911	3.97462				GeneID:115707039
LOC115707061	black	2.17804	1.85646	1.36304	2.05463	2.76077	0.303267	0.199198	1.60001	LBD38	At3g49940	LOB domain-containing protein 38	GeneID:115707061
LOC115707235	black	2.33629	3.01005	2.00514	2.59532	2.80197	1.16755	1.39469	2.2379	HSFC1	At3g24520	Heat stress transcription factor C-1	GeneID:115707235	GO:0005634,GO:0003700,GO:0000978,GO:0043565,GO:0034605,GO:0061408	nucleus|DNA-binding transcription factor activity|RNA polymerase II proximal promoter sequence-specific DNA binding|sequence-specific DNA binding|cellular response to heat|positive regulation of transcription from RNA polymerase II promoter in response to heat stress
LOC115707339	black	6.77669	7.09308	6.41854	6.46213	7.07781	5.73437	5.82448	6.27673	KPI104		Kunitz type trypsin inhibitor 104	GeneID:115707339	GO:0015066,GO:0004867	alpha-amylase inhibitor activity|serine-type endopeptidase inhibitor activity
LOC115707447	black	5.89285	6.43095	5.31166	5.70509	6.47195	4.82252	5.52015	5.90195	CXXS1	At1g11530	Thioredoxin-like protein CXXS1	GeneID:115707447	GO:0005829,GO:0003756,GO:0015035,GO:0045454,GO:0006662	cytosol|protein disulfide isomerase activity|protein disulfide oxidoreductase activity|cell redox homeostasis|glycerol ether metabolic process
LOC115707504	black	2.67786	2.38204	1.97849	1.57683	2.95616	0.800005	2.19871	2.17451	PER27	At3g01190	Peroxidase 27	GeneID:115707504	GO:0005576,GO:0009505,GO:0009506,GO:0020037,GO:0046872,GO:0004601,GO:0042744,GO:0006979	extracellular region|plant-type cell wall|plasmodesma|heme binding|metal ion binding|peroxidase activity|hydrogen peroxide catabolic process|response to oxidative stress	ko00940	Phenylpropanoid biosynthesis
LOC115707549	black	6.08181	6.39954	5.07169	5.39061	6.78431	4.32658	4.65083	5.02518				GeneID:115707549
LOC115707560	black	2.38901	2.94716	1.63244	1.05179	0	0	0.0622229	0			Probable non-specific lipid-transfer protein 2	GeneID:115707560	GO:0008289,GO:0006869	lipid binding|lipid transport
LOC115707575	black	6.70032	7.60892	7.08282	6.6595	7.30181	5.24814	6.3049	5.98086	MIOX1	At1g14520	Inositol oxygenase 1	GeneID:115707575	GO:0005737,GO:0050113,GO:0005506,GO:0019310,GO:0019853	cytoplasm|inositol oxygenase activity|iron ion binding|inositol catabolic process|L-ascorbic acid biosynthetic process	ko00053,ko00562	Ascorbate and aldarate metabolism|Inositol phosphate metabolism
LOC115707591	black	6.64651	6.72645	6.47521	5.4836	5.29778	5.41196	6.12556	6.05266			Polyphenol oxidase, chloroplastic	GeneID:115707591	GO:0009543,GO:0004097,GO:0046872,GO:0046148	chloroplast thylakoid lumen|catechol oxidase activity|metal ion binding|pigment biosynthetic process	ko00350,ko00950	Tyrosine metabolism|Isoquinoline alkaloid biosynthesis
LOC115707633	black	3.49306	3.64776	2.81566	2.70262	2.33014	1.96898	1.67571	2.70686	B120	At4g21390	G-type lectin S-receptor-like serine/threonine-protein kinase B120	GeneID:115707633
LOC115707636	black	2.07428	1.97757	1.98001	1.79991	1.54402	0.690253	0.992949	1.23396		At1g61480	G-type lectin S-receptor-like serine/threonine-protein kinase At1g61480	GeneID:115707636
LOC115707664	black	2.82674	3.03475	2.71401	2.18551	1.94049	1.36159	1.41118	2.17614	RLCK176	Os05g0110900	Receptor-like cytoplasmic kinase 176	GeneID:115707664	GO:0005524,GO:0004674,GO:0045087	ATP binding|protein serine/threonine kinase activity|innate immune response
LOC115707677	black	3.85352	3.98329	3.37097	2.28405	3.86154	2.81813	3.84774	3.49473	MCH1		Probable transporter MCH1	GeneID:115707677	GO:0016021,GO:0005774,GO:0055085	integral component of membrane|vacuolar membrane|transmembrane transport
LOC115707720	black	3.0959	3.29233	3.30413	3.30208	3.08487	0.0739971	0	2.5879	GLIP1	At5g40990	GDSL esterase/lipase 1	GeneID:115707720	GO:0005615,GO:0005622,GO:0016298,GO:0042742,GO:0050832,GO:0009817,GO:0009866,GO:0009871,GO:0016042,GO:0009620,GO:0009751,GO:0009627	extracellular space|intracellular|lipase activity|defense response to bacterium|defense response to fungus|defense response to fungus, incompatible interaction|induced systemic resistance, ethylene mediated signaling pathway|jasmonic acid and ethylene-dependent systemic resistance, ethylene mediated signaling pathway|lipid catabolic process|response to fungus|response to salicylic acid|systemic a…
LOC115707722	black	6.28215	6.28599	5.79781	6.05321	5.54648	4.80867	5.02351	5.11026	EFL4	At1g17455	Protein ELF4-LIKE 4	GeneID:115707722	GO:0005634,GO:0042803,GO:0009649,GO:0009648,GO:0042753,GO:0048511	nucleus|protein homodimerization activity|entrainment of circadian clock|photoperiodism|positive regulation of circadian rhythm|rhythmic process
LOC115707756	black	2.15992	3.23459	1.66389	1.52873	2.84541	1.96853	2.35385	2.16917	GSTU8	At3g09270	Glutathione S-transferase U8	GeneID:115707756	GO:0005737,GO:0005829,GO:0004364,GO:0006749,GO:0046686,GO:0009407	cytoplasm|cytosol|glutathione transferase activity|glutathione metabolic process|response to cadmium ion|toxin catabolic process	ko00480	Glutathione metabolism
LOC115707785	black	5.55762	5.90396	5.45081	5.22528	5.21385	4.31692	4.83565	4.78272	SWEET2	At3g14770	Bidirectional sugar transporter SWEET2	GeneID:115707785	GO:0005887,GO:0051119	integral component of plasma membrane|sugar transmembrane transporter activity
LOC115707804	black	1.26554	1.1241	1.37212	1.32303	1.96978	0.152358	0.0252048	1.37052	ENO1	Os10g0167300	Enolase	GeneID:115707804	GO:0000015,GO:0000287,GO:0004634,GO:0006096	phosphopyruvate hydratase complex|magnesium ion binding|phosphopyruvate hydratase activity|glycolytic process	ko00010,ko03018	Glycolysis / Gluconeogenesis|RNA degradation
LOC115707811	black	1.85465	1.59791	0.946958	1.80099	0.815133	0.394448	0.63635	0.757557				GeneID:115707811
LOC115707844	black	4.61911	4.85027	4.34668	4.97341	4.81995	3.43186	3.78551	4.06	dlc2		Dynein light chain 1, cytoplasmic	GeneID:115707844	GO:0005868,GO:0005829,GO:0030286,GO:0035974,GO:0005874,GO:0034399,GO:0005634,GO:0045505,GO:0051959,GO:0003774,GO:0030437,GO:0030989,GO:0000743,GO:2000582	cytoplasmic dynein complex|cytosol|dynein complex|meiotic spindle pole body|microtubule|nuclear periphery|nucleus|dynein intermediate chain binding|dynein light intermediate chain binding|motor activity|ascospore formation|dynein-driven meiotic oscillatory nuclear movement|nuclear migration involved in conjugation with cellular fusion|positive regulation of ATP-dependent microtubule motor activit…
LOC115707893	black	4.12134	4.31291	4.29658	4.13568	3.62838	2.61823	3.05387	3.8109				GeneID:115707893
LOC115707951	black	7.30329	7.67949	6.43568	7.14329	7.90145	6.74565	6.80038	6.10011	ATJ8	At1g80920	Chaperone protein dnaJ 8, chloroplastic	GeneID:115707951	GO:0009507,GO:0009570,GO:0005634,GO:0009416	chloroplast|chloroplast stroma|nucleus|response to light stimulus
LOC115707971	black	8.22298	8.32875	7.49822	7.85907	8.36401	7.00755	7.37506	7.41997				GeneID:115707971
LOC115707975	black	3.18079	3.7776	3.39609	3.51809	3.6821	1.84994	1.84042	2.47537	EGY2	At5g05740	Probable zinc metalloprotease EGY2, chloroplastic	GeneID:115707975	GO:0009507,GO:0031969,GO:0009535,GO:0016021,GO:0008237	chloroplast|chloroplast membrane|chloroplast thylakoid membrane|integral component of membrane|metallopeptidase activity
LOC115708122	black	4.03999	3.88647	3.97268	3.89729	3.94488	0	0	2.99218	MED15A	At1g15780	Mediator of RNA polymerase II transcription subunit 15a	GeneID:115708122	GO:0016592,GO:0005634,GO:0031490,GO:0003713,GO:0045723,GO:0009751	mediator complex|nucleus|chromatin DNA binding|transcription coactivator activity|positive regulation of fatty acid biosynthetic process|response to salicylic acid
LOC115708145	black	6.28341	6.37209	5.8794	6.25077	6.2679	4.83073	5.33475	5.62603				GeneID:115708145
LOC115708229	black	3.94912	4.36824	3.53891	3.60556	3.4332	2.60247	3.36865	3.23165	ERF110	At5g50080	Ethylene-responsive transcription factor ERF110	GeneID:115708229	GO:0005634,GO:0003677,GO:0003700,GO:0009873,GO:0045893,GO:0048510	nucleus|DNA binding|DNA-binding transcription factor activity|ethylene-activated signaling pathway|positive regulation of transcription, DNA-templated|regulation of timing of transition from vegetative to reproductive phase
LOC115708271	black	4.65064	4.60181	4.79949	4.72958	4.69944	0	0	3.60387			Protein yippee-like	GeneID:115708271	GO:0046872	metal ion binding
LOC115708278	black	2.44269	1.88328	2.36586	1.99845	3.00367	0	0	2.2708	CNR6		Cell number regulator 6	GeneID:115708278	GO:0016021	integral component of membrane
LOC115708314	black	2.21525	1.74629	2.1955	1.88653	2.48331	0.875482	1.03227	1.94544	MYB1	At3g09230	Transcription factor MYB1	GeneID:115708314	GO:0005634,GO:0003677,GO:0003700,GO:0009751	nucleus|DNA binding|DNA-binding transcription factor activity|response to salicylic acid
LOC115708330	black	2.16482	2.46279	2.75246	2.89631	2.62352	0.195784	0.161275	1.74794	NUDT20	At5g19460	Nudix hydrolase 20, chloroplastic	GeneID:115708330	GO:0009507,GO:0044715,GO:0046872	chloroplast|8-oxo-dGDP phosphatase activity|metal ion binding
LOC115708353	black	7.32725	7.31187	7.33574	7.29176	7.17077	0.769401	0.813995	5.96772	RPS27B	At3g61110	40S ribosomal protein S27-2	GeneID:115708353	GO:0005618,GO:0022626,GO:0022627,GO:0009506,GO:0042788,GO:0005840,GO:0046872,GO:0003735,GO:0000028,GO:0006412	cell wall|cytosolic ribosome|cytosolic small ribosomal subunit|plasmodesma|polysomal ribosome|ribosome|metal ion binding|structural constituent of ribosome|ribosomal small subunit assembly|translation	ko03010	Ribosome
LOC115708709	black	4.05874	3.96223	3.86675	3.82624	3.63991	1.67395	3.18286	2.94062	gpi1		N-acetylglucosaminyl-phosphatidylinositol biosynthetic protein gpi1	GeneID:115708709	GO:0005783,GO:0000506,GO:0016021,GO:0017176,GO:0006506	endoplasmic reticulum|glycosylphosphatidylinositol-N-acetylglucosaminyltransferase (GPI-GnT) complex|integral component of membrane|phosphatidylinositol N-acetylglucosaminyltransferase activity|GPI anchor biosynthetic process	ko00563	Glycosylphosphatidylinositol (GPI)-anchor biosynthesis
LOC115708715	black	1.47042	0.857573	1.58666	0.928717	0.539586	0	0.0809686	1.02769	LBD40	At1g67100	LOB domain-containing protein 40	GeneID:115708715	GO:0009739	response to gibberellin
LOC115708768	black	1.32586	2.11016	1.22464	1.1232	1.8285	0.422052	1.15444	1.62077			Polygalacturonase	GeneID:115708768	GO:0005618,GO:0005576,GO:0004650,GO:0005975,GO:0071555,GO:0009835	cell wall|extracellular region|polygalacturonase activity|carbohydrate metabolic process|cell wall organization|fruit ripening	ko00040	Pentose and glucuronate interconversions
LOC115708769	black	3.00237	3.56839	3.10529	2.73438	2.96573	1.30567	1.25025	2.55128			Dynein 8 kDa light chain, flagellar outer arm	GeneID:115708769	GO:0005930,GO:0097014,GO:0030286,GO:0005874,GO:0031514,GO:0003774,GO:0007017,GO:0044458	axoneme|ciliary plasm|dynein complex|microtubule|motile cilium|motor activity|microtubule-based process|motile cilium assembly
LOC115708782	black	3.39428	3.67404	3.38172	3.27279	3.06132	1.70345	2.40742	2.52264				GeneID:115708782
LOC115708825	black	5.21069	5.33066	4.61119	3.82423	3.496	3.03807	3.4089	3.603	HSFB3	At2g41690	Heat stress transcription factor B-3	GeneID:115708825	GO:0005737,GO:0005634,GO:0003700,GO:0000978,GO:0043565,GO:0034605,GO:0061408,GO:0046686	cytoplasm|nucleus|DNA-binding transcription factor activity|RNA polymerase II proximal promoter sequence-specific DNA binding|sequence-specific DNA binding|cellular response to heat|positive regulation of transcription from RNA polymerase II promoter in response to heat stress|response to cadmium ion
LOC115708892	black	2.9273	2.68508	3.11467	3.02171	3.0497	1.60368	1.47649	2.60879				GeneID:115708892
LOC115708899	black	1.75808	1.45054	1.65223	1.88688	1.60206	0.0468622	0.21004	0.618993				GeneID:115708899
LOC115708905	black	2.76155	3.69645	1.62724	1.19921	0.0435075	0	0	0.366523			Carbonic anhydrase, chloroplastic	GeneID:115708905	GO:0009570,GO:0004089,GO:0008270,GO:0015976	chloroplast stroma|carbonate dehydratase activity|zinc ion binding|carbon utilization	ko00910	Nitrogen metabolism
LOC115708908	black	3.88473	4.55217	3.03457	3.17913	4.8071	3.26253	3.8175	3.16862	SWEET12	At5g23660	Bidirectional sugar transporter SWEET12	GeneID:115708908	GO:0005887,GO:0005886,GO:0008515,GO:0051119,GO:0009793,GO:0051260,GO:0010431,GO:0015770	integral component of plasma membrane|plasma membrane|sucrose transmembrane transporter activity|sugar transmembrane transporter activity|embryo development ending in seed dormancy|protein homooligomerization|seed maturation|sucrose transport
LOC115708910	black	1.69767	1.55414	1.70323	2.40972	2.42567	0.213262	0.787394	1.86385	TFL1	At5g03840	Protein TERMINAL FLOWER 1	GeneID:115708910	GO:0005737,GO:0005634,GO:0005886,GO:0005773,GO:0031982,GO:0003712,GO:0030154,GO:0009908,GO:0090344,GO:0009910,GO:0006623,GO:0009744	cytoplasm|nucleus|plasma membrane|vacuole|vesicle|transcription coregulator activity|cell differentiation|flower development|negative regulation of cell aging|negative regulation of flower development|protein targeting to vacuole|response to sucrose
LOC115708913	black	2.33567	1.98303	2.45251	1.93947	1.87005	0.488024	1.11896	1.65744		At3g12180	Protein cornichon homolog 1	GeneID:115708913	GO:0016021,GO:0016192	integral component of membrane|vesicle-mediated transport
LOC115708950	black	1.67781	1.45802	1.58468	1.08326	1.05537	0.211773	0.425564	1.1848				GeneID:115708950
LOC115708954	black	2.54237	2.53286	2.63564	2.94524	2.97428	1.11087	1.43857	2.34659	MYB106	At3g01140	Transcription factor MYB106	GeneID:115708954	GO:0005634,GO:0003677,GO:0000902,GO:0035017,GO:1901957,GO:0010091	nucleus|DNA binding|cell morphogenesis|cuticle pattern formation|regulation of cutin biosynthetic process|trichome branching
LOC115708958	black	6.2725	3.55349	5.12262	3.25967	4.6151	2.49688	1.81354	3.32082			Thaumatin-like protein 1	GeneID:115708958	GO:0005576,GO:0006952	extracellular region|defense response
LOC115709006	black	2.87518	3.01181	2.51674	3.16367	2.79079	0.895173	0.890619	2.27211	IDD12	At4g02670	Protein indeterminate-domain 12	GeneID:115709006	GO:0005634,GO:0003677,GO:0003700,GO:0046872,GO:0006355	nucleus|DNA binding|DNA-binding transcription factor activity|metal ion binding|regulation of transcription, DNA-templated
LOC115709058	black	3.06686	3.20011	3.03227	3.19738	3.03059	0	0	2.09059	PEX12	At3g04460	Peroxisome biogenesis protein 12	GeneID:115709058	GO:0005779,GO:1990429,GO:0005778,GO:0005777,GO:0008022,GO:0004842,GO:0008270,GO:0048598,GO:0006635,GO:0007031,GO:0016558,GO:0006513	integral component of peroxisomal membrane|peroxisomal importomer complex|peroxisomal membrane|peroxisome|protein C-terminus binding|ubiquitin-protein transferase activity|zinc ion binding|embryonic morphogenesis|fatty acid beta-oxidation|peroxisome organization|protein import into peroxisome matrix|protein monoubiquitination	ko04146	Peroxisome
LOC115709061	black	7.40631	7.0876	6.33761	7.67796	7.56899	5.86572	6.01275	6.15494				GeneID:115709061
LOC115709073	black	3.17005	3.24042	2.98743	2.5299	2.71008	1.77355	2.04271	2.46311	GSTU9	At5g62480	Glutathione S-transferase U9	GeneID:115709073	GO:0005737,GO:0005829,GO:0004364,GO:0006749,GO:0009407	cytoplasm|cytosol|glutathione transferase activity|glutathione metabolic process|toxin catabolic process	ko00480	Glutathione metabolism
LOC115709083	black	1.58869	1.35774	1.29007	1.84788	1.17168	0	0.158677	0.549164	CYP93A1	Glyma03g29950	3,9-dihydroxypterocarpan 6A-monooxygenase	GeneID:115709083	GO:0016020,GO:0020037,GO:0005506,GO:0016709,GO:0006952	membrane|heme binding|iron ion binding|oxidoreductase activity,acting on paired donors, with incorporation or reduction of molecular oxygen, NAD(P)H as one donor, and incorporation of one atom of oxygen|defense response
LOC115709100	black	2.5834	2.37523	1.08287	0.748184	1.24163	0.234406	0.33404	0.810195	UGT73C5	At2g36800	UDP-glycosyltransferase 73C5	GeneID:115709100	GO:0016021,GO:0043231,GO:0050502,GO:0046527,GO:0080043,GO:0080046,GO:0080044,GO:0050403,GO:0008194,GO:0016131,GO:0098754	integral component of membrane|intracellular membrane-bounded organelle|cis-zeatin O-beta-D-glucosyltransferase activity|glucosyltransferase activity|quercetin 3-O-glucosyltransferase activity|quercetin 4'-O-glucosyltransferase activity|quercetin 7-O-glucosyltransferase activity|trans-zeatin O-beta-D-glucosyltransferase activity|UDP-glycosyltransferase activity|brassinosteroid metabolic process|d…	ko00908	Zeatin biosynthesis
LOC115709120	black	1.40569	2.3661	1.04199	1.02651	0.44038	1.01828	1.24063	0.709333	TBL38	At1g29050	Protein trichome birefringence-like 38	GeneID:115709120	GO:0005794,GO:0016021,GO:0016413	Golgi apparatus|integral component of membrane|O-acetyltransferase activity
LOC115709177	black	2.33889	2.8805	0.969334	1.34726	1.61365	0.0439313	0.0210203	0.636542	GLOX1	At1g67290	Aldehyde oxidase GLOX1	GeneID:115709177	GO:0005576,GO:0004031,GO:0102797,GO:0102798,GO:0007275	extracellular region|aldehyde oxidase activity|geranial:oxygen oxidoreductase activity|heptaldehyde:oxygen oxidoreductase activity|multicellular organism development
LOC115709179	black	3.32464	2.9401	3.28542	2.63637	2.7671	0.0245673	0	1.82287	FUC1	At2g28100	Alpha-L-fucosidase 1	GeneID:115709179	GO:0048046,GO:0005764,GO:0005773,GO:0004560,GO:0006004,GO:0006516,GO:0016139	apoplast|lysosome|vacuole|alpha-L-fucosidase activity|fucose metabolic process|glycoprotein catabolic process|glycoside catabolic process	ko00511	Other glycan degradation
LOC115709226	black	1.23863	1.75281	1.02289	0.408027	0.915326	0	0	0.701021	UGT73C6	At2g36790	UDP-glycosyltransferase 73C6	GeneID:115709226	GO:0043231,GO:0080043,GO:0080046,GO:0080044,GO:0035251,GO:0008194,GO:0051555	intracellular membrane-bounded organelle|quercetin 3-O-glucosyltransferase activity|quercetin 4'-O-glucosyltransferase activity|quercetin 7-O-glucosyltransferase activity|UDP-glucosyltransferase activity|UDP-glycosyltransferase activity|flavonol biosynthetic process	ko00908	Zeatin biosynthesis
LOC115709271	black	5.76104	6.90096	5.85242	4.51962	6.40085	3.17362	4.33272	4.43344	NIP1-2	At4g18910	Aquaporin NIP1-2	GeneID:115709271	GO:0016021,GO:0005886,GO:0015105,GO:0015267,GO:0015700,GO:0080170,GO:0046685	integral component of membrane|plasma membrane|arsenite transmembrane transporter activity|channel activity|arsenite transport|hydrogen peroxide transmembrane transport|response to arsenic-containing substance
LOC115709295	black	2.39079	2.50045	2.36128	2.68011	2.05737	0.567322	1.68287	1.4696	ABCG15	At3g21090	ABC transporter G family member 15	GeneID:115709295	GO:0016021,GO:0005886,GO:0005524,GO:0042626,GO:0080167,GO:0055085	integral component of membrane|plasma membrane|ATP binding|ATPase activity, coupled to transmembrane movement of substances|response to karrikin|transmembrane transport
LOC115709400	black	3.81987	3.80842	3.79653	3.7729	3.87141	2.33197	3.31531	3.18991	BETAA-AD	At5g11490	Beta-adaptin-like protein A	GeneID:115709400	GO:0030131,GO:0030665,GO:0005794,GO:0030276,GO:0043424,GO:0006886,GO:0016192	clathrin adaptor complex|clathrin-coated vesicle membrane|Golgi apparatus|clathrin binding|protein histidine kinase binding|intracellular protein transport|vesicle-mediated transport
LOC115709402	black	4.50853	4.42932	4.33857	4.19733	4.40818	1.54262	3.36436	3.44162	DNMT2	At5g25480	tRNA (cytosine(38)-C(5))-methyltransferase 2	GeneID:115709402	GO:0005634,GO:0008168,GO:0003723,GO:0045814,GO:0008033	nucleus|methyltransferase activity|RNA binding|negative regulation of gene expression, epigenetic|tRNA processing
LOC115709513	black	2.87423	2.94085	2.87783	2.89731	1.62217	0.169624	1.38618	1.00891				GeneID:115709513
LOC115709560	black	4.21178	4.0849	4.14522	4.30964	3.40919	2.59322	3.44309	3.42222			Uncharacterized leucine-rich repeat-containing protein C926.06c	GeneID:115709560	GO:0005737,GO:0005829,GO:0000329,GO:0005634,GO:0019901,GO:0005200	cytoplasm|cytosol|fungal-type vacuole membrane|nucleus|protein kinase binding|structural constituent of cytoskeleton
LOC115709576	black	2.73515	2.00449	1.6984	2.34449	1.58465	0.888966	1.64847	1.07447	Y-3	At3g17950	Uncharacterized protein At3g17950	GeneID:115709576
LOC115709590	black	2.0807	1.67122	1.98176	1.413	0.98505	0.0631748	0.0303332	0.688615		At1g56140	Probable LRR receptor-like serine/threonine-protein kinase At1g56140	GeneID:115709590
LOC115709630	black	6.48607	6.91006	5.95541	6.30121	6.31042	4.15342	5.25625	5.61138	TPS9	At1g23870	Probable alpha,alpha-trehalose-phosphate synthase [UDP-forming] 9	GeneID:115709630	GO:0005737,GO:0016757,GO:0016311,GO:0005992,GO:0070413	cytoplasm|transferase activity, transferring glycosyl groups|dephosphorylation|trehalose biosynthetic process|trehalose metabolism in response to stress	ko00500	Starch and sucrose metabolism
LOC115709759	black	2.43125	3.19289	1.52492	2.20654	2.08368	0.535256	0.539142	1.1525	ERN1		Ethylene-responsive transcription factor ERN1	GeneID:115709759	GO:0005634,GO:0003677,GO:0003700,GO:0009877,GO:0006355	nucleus|DNA binding|DNA-binding transcription factor activity|nodulation|regulation of transcription, DNA-templated
LOC115709811	black	3.83483	4.13903	2.77745	2.55992	3.41486	1.8574	2.66667	3.53124	BBR	At3g19910	E3 ubiquitin ligase BIG BROTHER-related	GeneID:115709811	GO:0046872,GO:0004842,GO:0051865,GO:0016567	metal ion binding|ubiquitin-protein transferase activity|protein autoubiquitination|protein ubiquitination
LOC115709863	black	6.42814	6.9432	6.36684	6.24678	6.56105	4.24647	4.78779	5.30883	RZPF34	At5g22920	E3 ubiquitin-protein ligase RZFP34	GeneID:115709863	GO:0005783,GO:0005634,GO:0016740,GO:0008270,GO:0016567,GO:1902456	endoplasmic reticulum|nucleus|transferase activity|zinc ion binding|protein ubiquitination|regulation of stomatal opening	ko04120	Ubiquitin mediated proteolysis
LOC115709913	black	5.63895	5.4853	5.58764	5.53318	5.39539	2.87562	4.59172	4.68562	TFIIB1		Transcription initiation factor IIB	GeneID:115709913	GO:0005634,GO:0046872,GO:0017025,GO:0006355,GO:0070897	nucleus|metal ion binding|TBP-class protein binding|regulation of transcription, DNA-templated|transcription preinitiation complex assembly	ko03022	Basal transcription factors
LOC115709938	black	3.36586	3.82608	3.10008	3.16049	3.40729	1.86152	2.646	3.49605	MUCI21	At3g10320	Xylan glycosyltransferase MUCI21	GeneID:115709938
LOC115709958	black	5.86928	5.76553	5.59774	5.43306	5.28015	3.5111	3.95507	4.41526			Probable aspartyl aminopeptidase	GeneID:115709958	GO:0005737,GO:0004177,GO:0008237,GO:0008270	cytoplasm|aminopeptidase activity|metallopeptidase activity|zinc ion binding
LOC115709991	black	2.98154	3.40348	2.72757	2.85383	2.62837	1.49979	1.96977	2.91861	MUCI21	At3g10320	Xylan glycosyltransferase MUCI21	GeneID:115709991
LOC115710020	black	5.58658	5.91013	5.5422	5.60953	5.17087	4.51879	4.77368	4.76844				GeneID:115710020
LOC115710039	black	2.12984	2.68704	2.24008	2.16453	2.28492	0.702638	0.293909	1.71477	fluG		Protein fluG	GeneID:115710039	GO:0005737,GO:0016787,GO:0008134,GO:0001896,GO:0048315,GO:0006598,GO:0075307,GO:0010914,GO:1900376,GO:0010913,GO:0000905,GO:0030435,GO:0045461	cytoplasm|hydrolase activity|transcription factor binding|autolysis|conidium formation|polyamine catabolic process|positive regulation of conidium formation|positive regulation of sterigmatocystin biosynthetic process|regulation of secondary metabolite biosynthetic process|regulation of sterigmatocystin biosynthetic process|sporocarp development involved in asexual reproduction|sporulation result…
LOC115710040	black	4.10493	4.10199	4.06168	4.06977	4.01762	0	0	2.92391	DRP5A	At1g53140	Dynamin-related protein 5A	GeneID:115710040	GO:0009504,GO:0005737,GO:0016020,GO:0005874,GO:0009524,GO:0005525,GO:0003924,GO:0008017,GO:0000911	cell plate|cytoplasm|membrane|microtubule|phragmoplast|GTP binding|GTPase activity|microtubule binding|cytokinesis by cell plate formation
LOC115710067	black	5.5972	5.43186	5.48163	5.33009	5.26592	0.360343	4.31391	4.55879	ACA4	At2g41560	Calcium-transporting ATPase 4, plasma membrane-type	GeneID:115710067	GO:0009507,GO:0005887,GO:0000325,GO:0009705,GO:0005774,GO:0005773,GO:0005524,GO:0005388,GO:0005516,GO:0046872,GO:0055081,GO:0042742,GO:0043069,GO:0009624	chloroplast|integral component of plasma membrane|plant-type vacuole|plant-type vacuole membrane|vacuolar membrane|vacuole|ATP binding|calcium-transporting ATPase activity|calmodulin binding|metal ion binding|anion homeostasis|defense response to bacterium|negative regulation of programmed cell death|response to nematode
LOC115710070	black	6.34906	6.59144	5.62584	4.82923	4.71828	4.94077	5.35621	5.10948			Blue copper protein	GeneID:115710070	GO:0009055,GO:0046872	electron transfer activity|metal ion binding
LOC115710081	black	2.47841	2.25429	2.6778	2.59838	2.04421	0.899052	2.2233	1.70546	ARP	At2g41460	DNA-(apurinic or apyrimidinic site) endonuclease, chloroplastic	GeneID:115710081	GO:0042644,GO:0005634,GO:0008408,GO:0140078,GO:0003677,GO:0003906,GO:0008311,GO:0004519,GO:0046872,GO:0016791,GO:0004528,GO:0006284,GO:0033683,GO:0045893	chloroplast nucleoid|nucleus|3'-5' exonuclease activity|class I DNA-(apurinic or apyrimidinic site) endonuclease activity|DNA binding|DNA-(apurinic or apyrimidinic site) endonuclease activity|double-stranded DNA 3'-5' exodeoxyribonuclease activity|endonuclease activity|metal ion binding|phosphatase activity|phosphodiesterase I activity|base-excision repair|nucleotide-excision repair, DNA incision…	ko03410	Base excision repair
LOC115710087	black	2.90947	2.80064	3.15451	3.11481	2.779	1.20398	2.83456	2.67846	ZOX1		Zeatin O-xylosyltransferase	GeneID:115710087	GO:0016758,GO:0050404,GO:0009690,GO:0006486	transferase activity, transferring hexosyl groups|zeatin O-beta-D-xylosyltransferase activity|cytokinin metabolic process|protein glycosylation	ko00908	Zeatin biosynthesis
LOC115710100	black	4.01825	3.24624	5.01537	3.34079	3.80375	2.2528	3.65263	3.83056	GNS1		Glucan endo-1,3-beta-glucosidase, basic isoform	GeneID:115710100	GO:0042973,GO:0005975,GO:0006952,GO:0009607	glucan endo-1,3-beta-D-glucosidase activity|carbohydrate metabolic process|defense response|response to biotic stimulus
LOC115710104	black	4.45342	4.22391	4.74188	4.21568	3.98367	2.96558	4.27593	3.82468	GNS1		Glucan endo-1,3-beta-glucosidase, basic isoform	GeneID:115710104	GO:0042973,GO:0005975,GO:0006952,GO:0009607	glucan endo-1,3-beta-D-glucosidase activity|carbohydrate metabolic process|defense response|response to biotic stimulus
LOC115710110	black	2.74143	2.44104	2.6513	2.67815	2.12657	0.732738	1.69925	2.33451				GeneID:115710110
LOC115710113	black	4.28837	3.85671	4.12433	4.22361	3.92215	0	3.26366	2.92906			Mitochondrial acidic protein mam33	GeneID:115710113	GO:0005737,GO:0005759,GO:0005739,GO:0097177,GO:0003729,GO:0008494,GO:0070131	cytoplasm|mitochondrial matrix|mitochondrion|mitochondrial ribosome binding|mRNA binding|translation activator activity|positive regulation of mitochondrial translation
LOC115710121	black	2.1228	2.30717	2.76537	3.05336	2.45363	0.215127	2.95756	2.86243	ACA4	At4g20990	Alpha carbonic anhydrase 4	GeneID:115710121	GO:0009570,GO:0009535,GO:0004089,GO:0008270	chloroplast stroma|chloroplast thylakoid membrane|carbonate dehydratase activity|zinc ion binding	ko00910	Nitrogen metabolism
LOC115710125	black	4.01523	3.89893	3.82057	3.8889	3.73629	0.192849	2.82063	3.07924				GeneID:115710125
LOC115710128	black	4.13219	4.18415	4.5704	4.56105	4.61459	0.524963	4.00835	3.45902			Histone H3.2	GeneID:115710128	GO:0000786,GO:0005634,GO:0003677,GO:0046982	nucleosome|nucleus|DNA binding|protein heterodimerization activity
LOC115710129	black	3.25317	3.65862	4.27713	4.25482	3.86498	1.89881	3.48656	3.04204	H3.1		Histone H3.2	GeneID:115710129	GO:0000786,GO:0005634,GO:0003677,GO:0046982	nucleosome|nucleus|DNA binding|protein heterodimerization activity
LOC115710131	black	5.56565	5.43744	5.6566	5.44326	5.47622	3.99929	4.9514	4.66267	SFGH	At2g41530	S-formylglutathione hydrolase	GeneID:115710131	GO:0048046,GO:0005829,GO:0052689,GO:0018738,GO:0046294,GO:0046686	apoplast|cytosol|carboxylic ester hydrolase activity|S-formylglutathione hydrolase activity|formaldehyde catabolic process|response to cadmium ion
LOC115710164	black	2.95119	3.04425	2.75592	2.6325	1.96441	1.28167	2.61867	1.98559	PAP27	At5g50400	Probable inactive purple acid phosphatase 27	GeneID:115710164	GO:0005576,GO:0003993,GO:0046872	extracellular region|acid phosphatase activity|metal ion binding
LOC115710179	black	3.6403	3.87278	3.44411	2.77181	3.26956	2.54842	2.63081	2.65591	SAUR77	At1g17345	Auxin-responsive protein SAUR77	GeneID:115710179	GO:0005737,GO:0019897,GO:0005634,GO:0009873,GO:0007275,GO:0030307,GO:0009733	cytoplasm|extrinsic component of plasma membrane|nucleus|ethylene-activated signaling pathway|multicellular organism development|positive regulation of cell growth|response to auxin
LOC115710182	black	6.21286	5.94565	5.7625	6.13669	5.65993	1.95823	5.75906	5.63485	TL1		Thaumatin-like protein 1a	GeneID:115710182	GO:0005576	extracellular region
LOC115710216	black	2.52278	2.73612	2.20082	1.49742	1.28745	1.17282	0.138353	1.0819	CYP71A9		Cytochrome P450 71A9	GeneID:115710216	GO:0016021,GO:0016020,GO:0020037,GO:0005506,GO:0016709	integral component of membrane|membrane|heme binding|iron ion binding|oxidoreductase activity,acting on paired donors, with incorporation or reduction of molecular oxygen, NAD(P)H as one donor, and incorporation of one atom of oxygen
LOC115710221	black	2.70923	2.57746	3.0653	2.82526	2.79245	1.87994	1.44125	2.29247	mcl1		Minichromosome loss protein 1	GeneID:115710221	GO:0000775,GO:0000790,GO:0043596,GO:0005654,GO:0005634,GO:0031298,GO:0003682,GO:0006974,GO:0061641,GO:0030702,GO:0006281,GO:0006261,GO:0000278,GO:1903461	chromosome, centromeric region|nuclear chromatin|nuclear replication fork|nucleoplasm|nucleus|replication fork protection complex|chromatin binding|cellular response to DNA damage stimulus|CENP-A containing chromatin organization|chromatin silencing at centromere|DNA repair|DNA-dependent DNA replication|mitotic cell cycle|Okazaki fragment processing involved in mitotic DNA replication
LOC115710223	black	1.77468	1.91728	2.07552	1.99406	2.18174	0.0328333	0.0617173	2.0653	RGA1		Putative disease resistance protein RGA1	GeneID:115710223	GO:0043531,GO:0005524,GO:0006952	ADP binding|ATP binding|defense response
LOC115710273	black	4.20162	4.19332	3.86649	4.03281	3.69302	2.79029	3.28566	2.92192				GeneID:115710273
LOC115710289	black	6.71817	7.09334	6.31831	6.47411	7.37384	5.72433	5.80982	6.53897		At5g61440	Thioredoxin-like 1-2, chloroplastic	GeneID:115710289	GO:0009507,GO:0045454,GO:0055114	chloroplast|cell redox homeostasis|oxidation-reduction process
LOC115710298	black	1.80157	2.15172	0.823091	0.885483	0.285401	0	0.430849	0.298213	LAMT		Loganic acid O-methyltransferase	GeneID:115710298
LOC115710308	black	4.94556	4.37145	4.30348	4.12772	3.78278	3.2029	3.79809	4.38774			Carbonic anhydrase, chloroplastic	GeneID:115710308	GO:0009570,GO:0004089,GO:0008270,GO:0015976	chloroplast stroma|carbonate dehydratase activity|zinc ion binding|carbon utilization	ko00910	Nitrogen metabolism
LOC115710312	black	2.12186	2.41361	1.9279	1.08913	0.525494	0.0568162	0.753955	0.662892	HSFB4D	Os03g0366800	Heat stress transcription factor B-4d	GeneID:115710312	GO:0005634,GO:0003700,GO:0000978,GO:0043565,GO:0034605,GO:0061408	nucleus|DNA-binding transcription factor activity|RNA polymerase II proximal promoter sequence-specific DNA binding|sequence-specific DNA binding|cellular response to heat|positive regulation of transcription from RNA polymerase II promoter in response to heat stress
LOC115710408	black	0.864231	1.14833	1.41712	1.80435	1.32278	0.130085	1.65532	0.717882				GeneID:115710408
LOC115710441	black	1.9457	1.99528	1.9958	1.89675	2.29072	0	0	1.27322	CPR1	At4g12560	F-box protein CPR1	GeneID:115710441	GO:0005737,GO:0005634,GO:0031348,GO:0042177,GO:0009626,GO:0016567	cytoplasm|nucleus|negative regulation of defense response|negative regulation of protein catabolic process|plant-type hypersensitive response|protein ubiquitination
LOC115710542	black	1.97488	2.49481	1.31229	1.05677	1.94314	0.94973	0.668631	1.36308		At1g28695	Uncharacterized protein At1g28695	GeneID:115710542
LOC115710673	black	4.86102	4.68477	4.81391	4.62254	4.54254	0.711815	1.46898	3.78582				GeneID:115710673
LOC115710914	black	0.900347	0.106333	1.15402	1.02041	0.868691	0	0	0				GeneID:115710914
LOC115710978	black	2.2867	2.29755	2.70871	2.51652	1.97038	1.35458	1.15219	1.7782		At5g06940	Probably inactive leucine-rich repeat receptor-like protein kinase At5g06940	GeneID:115710978
LOC115711010	black	2.01448	2.07741	2.41925	1.60421	1.44477	0.0938978	0.213642	0.929559		At1g56130	Probable LRR receptor-like serine/threonine-protein kinase At1g56130	GeneID:115711010
LOC115711070	black	1.38819	2.07182	0.796338	0.377621	0.634754	0.0344432	0.21483	1.00808	BC10	Os05g0170000	Glycosyltransferase BC10	GeneID:115711070
LOC115711096	black	3.01154	3.05834	3.23673	3.13799	2.93575	0.811811	2.65134	2.23696	ZOX1		Zeatin O-xylosyltransferase	GeneID:115711096	GO:0016758,GO:0050404,GO:0009690,GO:0006486	transferase activity, transferring hexosyl groups|zeatin O-beta-D-xylosyltransferase activity|cytokinin metabolic process|protein glycosylation	ko00908	Zeatin biosynthesis
LOC115711210	black	1.84621	2.01045	2.14496	1.75029	1.11448	0	1.18716	1.08359	RGA1		Putative disease resistance protein RGA1	GeneID:115711210	GO:0043531,GO:0005524,GO:0006952	ADP binding|ATP binding|defense response
LOC115711211	black	3.31241	3.2433	3.48824	3.27891	2.48506	0	2.20611	1.84956	RPPL1	At3g14470	Putative disease resistance RPP13-like protein 1	GeneID:115711211
LOC115711212	black	3.93507	3.92755	4.07108	3.80687	2.74442	0	2.97038	2.45068				GeneID:115711212
LOC115711218	black	8.12571	7.86211	7.70383	8.15805	7.34828	6.64554	7.21329	7.1052	ERD15	At2g41430	Protein EARLY RESPONSIVE TO DEHYDRATION 15	GeneID:115711218	GO:0005737,GO:0009617,GO:0009644,GO:0009414	cytoplasm|response to bacterium|response to high light intensity|response to water deprivation
LOC115711252	black	7.46486	7.51398	6.5263	7.05881	7.47924	5.87417	6.48266	6.57006				GeneID:115711252
LOC115711262	black	2.353	2.26255	2.00515	1.27425	0.923943	0.704987	1.0044	1.42656	PAL		Phenylalanine ammonia-lyase	GeneID:115711262	GO:0005737,GO:0045548,GO:0009800,GO:0006559	cytoplasm|phenylalanine ammonia-lyase activity|cinnamic acid biosynthetic process|L-phenylalanine catabolic process	ko00360,ko00940	Phenylalanine metabolism|Phenylpropanoid biosynthesis
LOC115711267	black	4.04114	3.82404	4.10592	4.14931	3.63594	0.244914	1.34311	2.6986	PEX12	At3g04460	Peroxisome biogenesis protein 12	GeneID:115711267	GO:0005779,GO:1990429,GO:0005778,GO:0005777,GO:0008022,GO:0004842,GO:0008270,GO:0048598,GO:0006635,GO:0007031,GO:0016558,GO:0006513	integral component of peroxisomal membrane|peroxisomal importomer complex|peroxisomal membrane|peroxisome|protein C-terminus binding|ubiquitin-protein transferase activity|zinc ion binding|embryonic morphogenesis|fatty acid beta-oxidation|peroxisome organization|protein import into peroxisome matrix|protein monoubiquitination	ko04146	Peroxisome
LOC115711285	black	6.23197	6.18548	5.81963	6.10814	6.07718	2.61538	4.28957	4.66619	KING1	At3g48530	SNF1-related protein kinase regulatory subunit gamma-1	GeneID:115711285	GO:0009505,GO:0005524,GO:0019887,GO:0005975,GO:0006633,GO:0042128	plant-type cell wall|ATP binding|protein kinase regulator activity|carbohydrate metabolic process|fatty acid biosynthetic process|nitrate assimilation
LOC115711293	black	5.01712	5.36374	5.82196	5.22558	4.8615	3.13305	4.3353	4.0889		At4g28100	Uncharacterized GPI-anchored protein At4g28100	GeneID:115711293	GO:0031225,GO:0046658	anchored component of membrane|anchored component of plasma membrane
LOC115711302	black	6.67869	6.52444	5.83643	5.97954	6.36487	5.51568	5.22101	5.76603		At2g36630	Sulfite exporter TauE/SafE family protein 4	GeneID:115711302	GO:0031464,GO:0016021,GO:0016567	Cul4A-RING E3 ubiquitin ligase complex|integral component of membrane|protein ubiquitination
LOC115711339	black	5.96314	6.20415	5.68822	5.85556	6.071	4.44444	5.2527	5.07212				GeneID:115711339
LOC115711358	black	2.66564	2.34145	3.05845	2.38494	2.1165	1.2518	1.1631	1.98412	LRK10		Rust resistance kinase Lr10	GeneID:115711358	GO:0016021,GO:0005886,GO:0005524,GO:0004674	integral component of membrane|plasma membrane|ATP binding|protein serine/threonine kinase activity
LOC115711405	black	3.97361	3.75083	3.59351	3.77973	3.66038	1.82219	3.08247	3.20707	PEX3-2	At1g48635	Peroxisome biogenesis protein 3-2	GeneID:115711405	GO:0005779,GO:0007031,GO:0015031	integral component of peroxisomal membrane|peroxisome organization|protein transport	ko04146	Peroxisome
LOC115711410	black	4.62439	3.63181	3.86728	4.28828	4.65621	3.35563	2.89616	4.10564				GeneID:115711410
LOC115711463	black	2.35476	2.78886	3.04884	2.75897	2.72665	1.55234	2.31838	1.91159			Polygalacturonase	GeneID:115711463	GO:0005618,GO:0005576,GO:0004650,GO:0005975,GO:0071555,GO:0009835	cell wall|extracellular region|polygalacturonase activity|carbohydrate metabolic process|cell wall organization|fruit ripening	ko00040	Pentose and glucuronate interconversions
LOC115711477	black	3.42011	3.26257	3.21844	3.35646	3.14576	1.74978	1.78671	2.54912		At5g03700	PAN domain-containing protein At5g03700	GeneID:115711477	GO:0005768,GO:0005794,GO:0016021,GO:0005886,GO:0005802,GO:0048544	endosome|Golgi apparatus|integral component of membrane|plasma membrane|trans-Golgi network|recognition of pollen
LOC115711483	black	2.08087	2.67598	2.21432	1.97722	1.41652	0.768077	0.713839	1.14612	PAP27	At5g50400	Probable inactive purple acid phosphatase 27	GeneID:115711483	GO:0005576,GO:0003993,GO:0046872	extracellular region|acid phosphatase activity|metal ion binding
LOC115711491	black	3.19799	3.65844	2.5321	2.32001	2.1989	2.02099	2.08717	2.36266		At5g03795	Probable glycosyltransferase At5g03795	GeneID:115711491	GO:0000139,GO:0016021,GO:0016757,GO:0071555,GO:0006486	Golgi membrane|integral component of membrane|transferase activity, transferring glycosyl groups|cell wall organization|protein glycosylation
LOC115711513	black	5.79066	5.50101	5.63838	5.47117	5.34472	4.18871	4.14272	4.96603				GeneID:115711513
LOC115711545	black	2.25446	2.51655	1.70923	1.24805	1.51792	1.21335	1.17647	2.19046		At1g74360	Probable LRR receptor-like serine/threonine-protein kinase At1g74360	GeneID:115711545
LOC115711587	black	5.96679	6.128	5.76135	5.46943	5.51511	3.83833	4.58082	4.72347	ADPG2	At2g41850	Polygalacturonase ADPG2	GeneID:115711587	GO:0005618,GO:0005576,GO:0004650,GO:0009901,GO:0009830,GO:0010227,GO:0010047,GO:0045490	cell wall|extracellular region|polygalacturonase activity|anther dehiscence|cell wall modification involved in abscission|floral organ abscission|fruit dehiscence|pectin catabolic process
LOC115711605	black	2.90504	3.63973	3.6869	2.65345	2.49699	1.17038	2.21876	2.42132	ZOG1		Zeatin O-glucosyltransferase	GeneID:115711605	GO:0050403,GO:0050404,GO:0009690,GO:0048439,GO:0009965,GO:0045926,GO:0006486,GO:0010380,GO:0010083,GO:0010015,GO:0048316	trans-zeatin O-beta-D-glucosyltransferase activity|zeatin O-beta-D-xylosyltransferase activity|cytokinin metabolic process|flower morphogenesis|leaf morphogenesis|negative regulation of growth|protein glycosylation|regulation of chlorophyll biosynthetic process|regulation of vegetative meristem growth|root morphogenesis|seed development	ko00908	Zeatin biosynthesis
LOC115711606	black	4.99562	4.85134	4.99245	4.98152	4.70476	1.91214	4.25391	4.06746	DUF5	At2g47220	DUF724 domain-containing protein 5	GeneID:115711606	GO:0009570,GO:0005634,GO:0042803,GO:0040008	chloroplast stroma|nucleus|protein homodimerization activity|regulation of growth
LOC115711607	black	2.61478	2.44878	2.58801	2.85941	2.62013	1.57627	1.54403	1.77856	AHA11	At5g62670	ATPase 11, plasma membrane-type	GeneID:115711607	GO:0016021,GO:0016020,GO:0005886,GO:0005524,GO:0046872,GO:0008553,GO:0120029,GO:1902600,GO:0051453	integral component of membrane|membrane|plasma membrane|ATP binding|metal ion binding|proton-exporting ATPase activity, phosphorylative mechanism|proton export across plasma membrane|proton transmembrane transport|regulation of intracellular pH	ko00190	Oxidative phosphorylation
LOC115711610	black	4.91787	4.88466	4.61104	4.6135	4.66333	2.07732	1.95828	3.88291		Os05g0446300	Protein BUD31 homolog 2	GeneID:115711610	GO:0005681,GO:0000398	spliceosomal complex|mRNA splicing, via spliceosome	ko03040	Spliceosome
LOC115711616	black	5.12231	4.67421	4.88095	5.15824	5.04148	0	0.0953821	4.197	GRXC1	At5g63030	Glutaredoxin-C1	GeneID:115711616	GO:0005737,GO:0009055,GO:0004362,GO:0015035,GO:0045454,GO:0034599	cytoplasm|electron transfer activity|glutathione-disulfide reductase activity|protein disulfide oxidoreductase activity|cell redox homeostasis|cellular response to oxidative stress
LOC115711674	black	2.45746	3.25178	2.87301	2.02862	2.04829	1.81925	2.44916	1.64775	CYC		Transcription factor CYCLOIDEA	GeneID:115711674	GO:0005634,GO:0003677,GO:0003700,GO:0048262,GO:0009908,GO:0009799	nucleus|DNA binding|DNA-binding transcription factor activity|determination of dorsal/ventral asymmetry|flower development|specification of symmetry
LOC115711698	black	8.99635	8.97205	8.67716	8.71651	8.42953	7.46736	7.66697	7.98374	bud20		Zinc finger protein bud20	GeneID:115711698	GO:0005730,GO:0005634,GO:0030687,GO:0003676,GO:0043023,GO:0008270,GO:0000055,GO:0042254	nucleolus|nucleus|preribosome, large subunit precursor|nucleic acid binding|ribosomal large subunit binding|zinc ion binding|ribosomal large subunit export from nucleus|ribosome biogenesis
LOC115712068	black	3.52531	3.54492	3.66461	3.54459	2.17004	1.00774	3.20018	1.91648				GeneID:115712068
LOC115712085	black	0.179193	3.31695	0.583717	0.32326	0	0.139351	0	0.230493				GeneID:115712085
LOC115712095	black	1.62986	1.80322	1.72925	2.12291	2.15021	0.795529	0.822369	0.992578	CYP81E8		Cytochrome P450 81E8	GeneID:115712095	GO:0016021,GO:0020037,GO:0005506,GO:0004497,GO:0016705	integral component of membrane|heme binding|iron ion binding|monooxygenase activity|oxidoreductase activity, acting on paired donors, with incorporation or reduction of molecular oxygen	ko00943	Isoflavonoid biosynthesis
LOC115712128	black	3.26052	2.37621	1.94011	1.87681	2.49116	1.4151	1.81792	2.94116	WRKY51	At5g64810	Probable WRKY transcription factor 51	GeneID:115712128	GO:0005634,GO:0003700,GO:0043565,GO:0042742,GO:0050832,GO:0009867	nucleus|DNA-binding transcription factor activity|sequence-specific DNA binding|defense response to bacterium|defense response to fungus|jasmonic acid mediated signaling pathway
LOC115712146	black	4.18629	4.66608	3.47645	2.72019	3.09418	2.137	2.39746	2.84949		At1g66480	Uncharacterized protein At1g66480	GeneID:115712146	GO:0005886	plasma membrane
LOC115712157	black	6.17192	5.78035	4.84286	4.01521	5.43416	3.76648	4.43157	6.02974	MO2	At4g38540	Monooxygenase 2	GeneID:115712157	GO:0071949,GO:0004497,GO:0002239	FAD binding|monooxygenase activity|response to oomycetes
LOC115712167	black	4.17286	4.31599	3.95991	3.7385	3.49884	3.10089	2.79502	4.31182	LRK10L-11	At1g25390	LEAF RUST 10 DISEASE-RESISTANCE LOCUS RECEPTOR-LIKE PROTEIN KINASE-like 1.1	GeneID:115712167
LOC115712201	black	3.73521	3.57719	2.64398	2.27562	3.17501	2.17781	3.02631	2.78136				GeneID:115712201
LOC115712318	black	1.85045	2.74625	0.823022	0.262811	0.127742	0.0784117	0	0.152273	CYP71B26	At3g26290	Cytochrome P450 71B26	GeneID:115712318	GO:0016021,GO:0016020,GO:0020037,GO:0005506,GO:0016709	integral component of membrane|membrane|heme binding|iron ion binding|oxidoreductase activity,acting on paired donors, with incorporation or reduction of molecular oxygen, NAD(P)H as one donor, and incorporation of one atom of oxygen
LOC115712321	black	1.87365	1.88714	1.61049	2.3977	2.05078	0.48775	1.28489	1.90638	DTX29	At3g26590	Protein DETOXIFICATION 29	GeneID:115712321	GO:0016021,GO:0005774,GO:0005773,GO:0015297,GO:0015238,GO:0006855	integral component of membrane|vacuolar membrane|vacuole|antiporter activity|drug transmembrane transporter activity|drug transmembrane transport
LOC115712401	black	4.21001	4.74364	3.71766	4.40819	3.62438	3.18728	3.56986	3.0282				GeneID:115712401
LOC115712428	black	1.97784	2.7416	2.21275	2.18495	1.5208	0.734182	1.31306	1.15563	HLS1	At4g37580	Probable N-acetyltransferase HLS1	GeneID:115712428	GO:0008080,GO:0016747,GO:0009734,GO:0009640,GO:0040008,GO:0009723,GO:0009826	N-acetyltransferase activity|transferase activity, transferring acyl groups other than amino-acyl groups|auxin-activated signaling pathway|photomorphogenesis|regulation of growth|response to ethylene|unidimensional cell growth
LOC115712473	black	2.26188	2.16884	1.58843	2.44026	2.72614	1.67046	1.74113	1.22512				GeneID:115712473
LOC115712513	black	0.952085	1.83463	0.435582	0.0918573	0.560896	0	0.462583	0.267901	VQ8	At1g68450	VQ motif-containing protein 8, chloroplastic	GeneID:115712513	GO:0009507,GO:0005634	chloroplast|nucleus
LOC115712526	black	3.75767	3.94835	2.53773	2.72388	3.50487	2.611	3.17698	2.93375		At5g14285	TLC domain-containing protein At5g14285	GeneID:115712526	GO:0016021	integral component of membrane
LOC115712599	black	2.42836	2.44163	2.15002	2.49102	2.34521	0.46465	0.518929	0.561713		At2g40290	Eukaryotic translation initiation factor 2 subunit alpha homolog	GeneID:115712599	GO:0005829,GO:0033290,GO:0005850,GO:0005851,GO:0043614,GO:0005634,GO:0003729,GO:0043022,GO:0003743	cytosol|eukaryotic 48S preinitiation complex|eukaryotic translation initiation factor 2 complex|eukaryotic translation initiation factor 2B complex|multi-eIF complex|nucleus|mRNA binding|ribosome binding|translation initiation factor activity	ko03013,ko04141	RNA transport|Protein processing in endoplasmic reticulum
LOC115712764	black	3.78668	4.5355	3.04039	2.43755	4.10671	2.98	3.45638	3.52677	CYP71B37	At3g26330	Cytochrome P450 71B37	GeneID:115712764	GO:0016021,GO:0016020,GO:0020037,GO:0005506,GO:0016709	integral component of membrane|membrane|heme binding|iron ion binding|oxidoreductase activity,acting on paired donors, with incorporation or reduction of molecular oxygen, NAD(P)H as one donor, and incorporation of one atom of oxygen
LOC115712923	black	6.43232	6.96218	7.53582	7.52216	6.5508	6.07232	6.79919	6.71046	GAD5	At3g17760	Glutamate decarboxylase 5	GeneID:115712923	GO:0005829,GO:0009506,GO:0005516,GO:0004351,GO:0030170,GO:0006538	cytosol|plasmodesma|calmodulin binding|glutamate decarboxylase activity|pyridoxal phosphate binding|glutamate catabolic process	ko00250,ko00410,ko00430,ko00650	Alanine, aspartate and glutamate metabolism|beta-Alanine metabolism|Taurine and hypotaurine metabolism|Butanoate metabolism
LOC115713002	black	6.51261	6.76247	5.9039	6.4637	6.23163	5.03314	5.32294	5.36539		At3g17800	UV-B-induced protein At3g17800, chloroplastic	GeneID:115713002	GO:0009507,GO:0010193,GO:0010224,GO:0009611	chloroplast|response to ozone|response to UV-B|response to wounding
LOC115713128	black	2.06254	2.11487	1.4933	1.20813	2.56543	1.12514	0.824544	0.912896			Pathogen-related protein	GeneID:115713128	GO:0006952,GO:0009607	defense response|response to biotic stimulus
LOC115713440	black	7.65457	7.74987	6.80563	7.05507	7.23307	6.6702	7.22718	6.23842				GeneID:115713440
LOC115713817	black	7.50231	8.29055	7.69423	7.26684	8.0666	6.78379	6.76054	7.15134		At2g30600/At2g30610	BTB/POZ domain-containing protein At2g30600	GeneID:115713817	GO:0016567	protein ubiquitination
LOC115713865	black	4.82879	5.98234	4.71999	4.92294	5.20869	3.69575	4.24742	4.43592	AAE1	At1g20560	Probable acyl-activating enzyme 1, peroxisomal	GeneID:115713865	GO:0005777,GO:0016874,GO:0006631	peroxisome|ligase activity|fatty acid metabolic process
LOC115713937	black	5.66742	6.04622	5.09428	4.87663	5.81156	3.61535	5.1572	3.94071				GeneID:115713937
LOC115714010	black	8.80307	9.54814	8.35727	8.4766	8.86592	7.91858	7.83851	8.01212	ATJ11	At4g36040	Chaperone protein dnaJ 11, chloroplastic	GeneID:115714010	GO:0009507,GO:0009570,GO:0005634,GO:0009536	chloroplast|chloroplast stroma|nucleus|plastid
LOC115714088	black	10.9045	11.0345	9.95283	11.5169	9.89609	8.07698	9.22816	9.25835				GeneID:115714088
LOC115714162	black	4.13918	4.80959	3.70064	4.44339	4.03059	2.78439	3.9363	3.65285	ADO3	At1g68050	Adagio protein 3	GeneID:115714162	GO:0005829,GO:0005634,GO:0019005,GO:0009881,GO:0007623,GO:0009908,GO:0009911,GO:0016567,GO:0018298,GO:0010468,GO:0006355,GO:0009637	cytosol|nucleus|SCF ubiquitin ligase complex|photoreceptor activity|circadian rhythm|flower development|positive regulation of flower development|protein ubiquitination|protein-chromophore linkage|regulation of gene expression|regulation of transcription, DNA-templated|response to blue light	ko04712	Circadian rhythm - plant
LOC115714219	black	5.77	6.07978	5.43981	5.47844	5.28715	4.94295	4.25318	4.88714				GeneID:115714219
LOC115714229	black	5.53477	6.16061	5.2373	4.88906	5.56579	4.6756	4.3141	4.94199				GeneID:115714229
LOC115714283	black	5.32512	5.21334	5.25967	5.04411	4.7778	3.93616	4.18286	4.80536	srdG		Epoxide hydrolase srdG	GeneID:115714283	GO:0052689,GO:0004301,GO:0009636	carboxylic ester hydrolase activity|epoxide hydrolase activity|response to toxic substance
LOC115714314	black	2.84034	2.93459	2.2553	1.5029	2.38355	1.62908	2.42165	2.35302	PERK14	At4g32710	Proline-rich receptor-like protein kinase PERK14	GeneID:115714314
LOC115714323	black	6.31024	6.76641	5.04546	5.69043	6.61441	4.15219	5.71235	5.60292				GeneID:115714323
LOC115714332	black	5.43758	5.68568	5.09614	5.11353	4.78394	4.22206	4.24897	4.30063				GeneID:115714332
LOC115714333	black	5.28869	5.43368	5.03914	4.66662	4.32542	3.68144	4.23051	4.07711	GRXC3	At1g77370	Glutaredoxin-C3	GeneID:115714333	GO:0005794,GO:0009055,GO:0004362,GO:0015035,GO:0045454,GO:0034599	Golgi apparatus|electron transfer activity|glutathione-disulfide reductase activity|protein disulfide oxidoreductase activity|cell redox homeostasis|cellular response to oxidative stress
LOC115714383	black	2.32729	2.72128	1.9477	0.251922	1.03613	1.01684	1.52639	0.884406				GeneID:115714383
LOC115714414	black	1.00781	2.32753	0.723294	0.857726	0.400768	0.837575	0.183777	0.224117	PLT6	At4g36670	Probable polyol transporter 6	GeneID:115714414	GO:0005887,GO:0005351,GO:0005355,GO:0008645	integral component of plasma membrane|carbohydrate:proton symporter activity|glucose transmembrane transporter activity|hexose transmembrane transport
LOC115714426	black	6.30246	6.49539	5.05857	6.38977	5.60406	2.96598	2.86623	3.96288	YPQ1	YOL092W	Probable vacuolar amino acid transporter YPQ1	GeneID:115714426	GO:0071627,GO:0015174,GO:0034488	integral component of fungal-type vacuolar membrane|basic amino acid transmembrane transporter activity|basic amino acid transmembrane export from vacuole
LOC115714434	black	3.07713	4.18532	2.62267	2.75337	1.85129	1.13761	2.05831	1.12233				GeneID:115714434
LOC115714457	black	8.07598	7.90868	7.13341	7.34512	8.40334	6.4826	7.3675	7.4501	ATHB-40	At4g36740	Homeobox-leucine zipper protein ATHB-40	GeneID:115714457	GO:0005634,GO:0003700,GO:0043565,GO:0009733	nucleus|DNA-binding transcription factor activity|sequence-specific DNA binding|response to auxin
LOC115714463	black	8.96242	9.89595	8.11503	8.78877	9.13855	6.50156	7.98162	7.71256	STR15	At4g35770	Rhodanese-like domain-containing protein 15, chloroplastic	GeneID:115714463	GO:0009507,GO:0009579,GO:0007568,GO:0009753,GO:0006979,GO:0009611	chloroplast|thylakoid|aging|response to jasmonic acid|response to oxidative stress|response to wounding
LOC115714535	black	2.39321	2.79435	1.51851	0.524366	1.36963	0.750703	0.751937	2.90895	MYB4	Os04g0517100	Transcription factor MYB4	GeneID:115714535	GO:0005634,GO:0043565,GO:0044212,GO:0030154,GO:0045893,GO:0009409	nucleus|sequence-specific DNA binding|transcription regulatory region DNA binding|cell differentiation|positive regulation of transcription, DNA-templated|response to cold
LOC115714569	black	3.99156	3.97814	3.32784	3.7341	3.1682	2.23783	3.01708	2.78064				GeneID:115714569
LOC115714574	black	3.25663	2.46788	3.23628	3.73843	3.59218	2.19509	2.05494	2.55058				GeneID:115714574
LOC115714588	black	4.13444	5.35234	4.14297	3.70549	5.28862	3.53103	3.68983	4.19558	BT4	At5g67480	BTB/POZ and TAZ domain-containing protein 4	GeneID:115714588	GO:0005737,GO:0005634,GO:0005774,GO:0005516,GO:0004402,GO:0003712,GO:0008270,GO:0016567,GO:0006355,GO:0009733,GO:0009739,GO:0042542,GO:0009753,GO:0009751,GO:0009651,GO:0009611	cytoplasm|nucleus|vacuolar membrane|calmodulin binding|histone acetyltransferase activity|transcription coregulator activity|zinc ion binding|protein ubiquitination|regulation of transcription, DNA-templated|response to auxin|response to gibberellin|response to hydrogen peroxide|response to jasmonic acid|response to salicylic acid|response to salt stress|response to wounding
LOC115714631	black	2.77505	2.86415	2.34732	2.24905	1.96606	1.47834	1.65916	1.3367	LBD42	At1g68510	LOB domain-containing protein 42	GeneID:115714631
LOC115714644	black	4.29242	3.81964	3.35294	4.00047	3.53111	0.462452	2.88474	2.84741				GeneID:115714644
LOC115714663	black	2.78814	2.43449	1.98782	2.76758	1.7712	1.39469	0.917319	1.59144	RTNLB13	At2g23640	Reticulon-like protein B13	GeneID:115714663	GO:0005789,GO:0071782,GO:0071458,GO:0071786	endoplasmic reticulum membrane|endoplasmic reticulum tubular network|integral component of cytoplasmic side of endoplasmic reticulum membrane|endoplasmic reticulum tubular network organization
LOC115714674	black	2.67348	3.08617	2.78619	3.14593	2.54208	1.24795	1.8082	1.03138				GeneID:115714674
LOC115714709	black	4.71443	4.65593	4.7187	4.2778	3.51604	1.54236	2.14423	2.52336	SAUR50	At4g34760	Auxin-responsive protein SAUR50	GeneID:115714709	GO:0009734,GO:0040008	auxin-activated signaling pathway|regulation of growth
LOC115714726	black	4.15894	3.56724	4.55825	3.8599	3.52296	2.19119	2.69576	3.23357	DTX12	At1g15170	Protein DETOXIFICATION 12	GeneID:115714726	GO:0009507,GO:0016021,GO:0015297,GO:0015238,GO:0006855	chloroplast|integral component of membrane|antiporter activity|drug transmembrane transporter activity|drug transmembrane transport
LOC115714727	black	4.29901	4.99676	4.57733	3.98305	4.64367	3.07235	3.75707	4.202	DTX12	At1g15170	Protein DETOXIFICATION 12	GeneID:115714727	GO:0009507,GO:0016021,GO:0015297,GO:0015238,GO:0006855	chloroplast|integral component of membrane|antiporter activity|drug transmembrane transporter activity|drug transmembrane transport
LOC115714766	black	2.05547	3.04088	1.91337	1.37477	0.858616	0.0464365	0	1.34295	XTH2	At4g13090	Xyloglucan endotransglucosylase/hydrolase protein 2	GeneID:115714766	GO:0048046,GO:0005618,GO:0004553,GO:0016762,GO:0042546,GO:0071555,GO:0010411	apoplast|cell wall|hydrolase activity, hydrolyzing O-glycosyl compounds|xyloglucan:xyloglucosyl transferase activity|cell wall biogenesis|cell wall organization|xyloglucan metabolic process
LOC115714839	black	5.71215	5.58658	5.54041	5.89638	5.26481	4.82992	4.09991	4.51913	COL16	At1g25440	Zinc finger protein CONSTANS-LIKE 16	GeneID:115714839	GO:0016020,GO:0005634,GO:0003700,GO:0008270,GO:0006355	membrane|nucleus|DNA-binding transcription factor activity|zinc ion binding|regulation of transcription, DNA-templated
LOC115714852	black	4.44766	5.28068	4.12576	4.43351	3.77807	2.72275	3.07156	3.14929	CYP90C1	At4g36380	3-epi-6-deoxocathasterone 23-monooxygenase CYP90C1	GeneID:115714852	GO:0005789,GO:0016021,GO:0020037,GO:0005506,GO:0004497,GO:0016709,GO:0016132,GO:0010268,GO:0048366,GO:0009965,GO:0042814,GO:0007275,GO:0055114,GO:0048441,GO:0048443,GO:0016125	endoplasmic reticulum membrane|integral component of membrane|heme binding|iron ion binding|monooxygenase activity|oxidoreductase activity,acting on paired donors, with incorporation or reduction of molecular oxygen, NAD(P)H as one donor, and incorporation of one atom of oxygen|brassinosteroid biosynthetic process|brassinosteroid homeostasis|leaf development|leaf morphogenesis|monopolar cell grow…	ko00905	Brassinosteroid biosynthesis
LOC115715005	black	6.50817	7.51292	5.65126	5.28671	5.93245	4.24089	4.86038	5.30602		At1g78850	EP1-like glycoprotein 3	GeneID:115715005	GO:0048046,GO:0005618,GO:0005829,GO:0005794,GO:0009505,GO:0005774,GO:0030246	apoplast|cell wall|cytosol|Golgi apparatus|plant-type cell wall|vacuolar membrane|carbohydrate binding
LOC115715019	black	4.37083	4.43222	4.2355	3.87406	3.51876	3.21852	2.7987	3.7359	RIN4	At3g25070	RPM1-interacting protein 4	GeneID:115715019	GO:0012505,GO:0019897,GO:0016020,GO:0005886,GO:0010204,GO:0009816,GO:0034051,GO:0009626,GO:0006468,GO:0002237	endomembrane system|extrinsic component of plasma membrane|membrane|plasma membrane|defense response signaling pathway, resistance gene-independent|defense response to bacterium, incompatible interaction|negative regulation of plant-type hypersensitive response|plant-type hypersensitive response|protein phosphorylation|response to molecule of bacterial origin	ko04626	Plant-pathogen interaction
LOC115715085	black	6.16578	6.60027	5.60798	6.09957	6.26664	5.01433	5.59257	5.36644		At3g17800	UV-B-induced protein At3g17800, chloroplastic	GeneID:115715085	GO:0009507,GO:0010193,GO:0010224,GO:0009611	chloroplast|response to ozone|response to UV-B|response to wounding
LOC115715113	black	5.99673	6.48744	5.63374	5.49685	5.70459	4.55729	4.92187	5.1486	ERF113	At5g13330	Ethylene-responsive transcription factor ERF113	GeneID:115715113	GO:0005634,GO:0003700,GO:0043565,GO:0071497,GO:0009873,GO:0019760,GO:0045893,GO:0009737,GO:0009723,GO:0009753,GO:0009751,GO:0009651,GO:0009414	nucleus|DNA-binding transcription factor activity|sequence-specific DNA binding|cellular response to freezing|ethylene-activated signaling pathway|glucosinolate metabolic process|positive regulation of transcription, DNA-templated|response to abscisic acid|response to ethylene|response to jasmonic acid|response to salicylic acid|response to salt stress|response to water deprivation
LOC115715194	black	6.85714	7.26573	6.35564	6.64574	6.91322	5.48651	6.21317	6.67742	TPS9	At1g23870	Probable alpha,alpha-trehalose-phosphate synthase [UDP-forming] 9	GeneID:115715194	GO:0005737,GO:0016757,GO:0016311,GO:0005992,GO:0070413	cytoplasm|transferase activity, transferring glycosyl groups|dephosphorylation|trehalose biosynthetic process|trehalose metabolism in response to stress	ko00500	Starch and sucrose metabolism
LOC115715277	black	2.6599	2.97666	2.74743	2.62304	2.80239	1.35769	1.98813	3.17735		At1g78860	EP1-like glycoprotein 4	GeneID:115715277	GO:0005618,GO:0005576,GO:0009505,GO:0030246	cell wall|extracellular region|plant-type cell wall|carbohydrate binding
LOC115715280	black	5.46667	5.49801	4.74897	4.55027	4.55962	3.31597	4.47155	4.58735	WRKY75	At5g13080	Probable WRKY transcription factor 75	GeneID:115715280	GO:0005634,GO:0003700,GO:0000978,GO:0044212,GO:0010055,GO:0048527,GO:0000122,GO:0043620,GO:0032107	nucleus|DNA-binding transcription factor activity|RNA polymerase II proximal promoter sequence-specific DNA binding|transcription regulatory region DNA binding|atrichoblast differentiation|lateral root development|negative regulation of transcription by RNA polymerase II|regulation of DNA-templated transcription in response to stress|regulation of response to nutrient levels
LOC115715330	black	4.13109	3.86355	3.27714	4.32884	3.79263	2.80674	3.14968	3.37571				GeneID:115715330
LOC115715579	black	6.20104	7.00493	5.6414	6.0015	6.62984	4.29006	4.53273	5.45346	BCA5	At4g33580	Beta carbonic anhydrase 5, chloroplastic	GeneID:115715579	GO:0009507,GO:0005737,GO:0004089,GO:0008270,GO:0015976,GO:0010119,GO:0010037	chloroplast|cytoplasm|carbonate dehydratase activity|zinc ion binding|carbon utilization|regulation of stomatal movement|response to carbon dioxide	ko00910	Nitrogen metabolism
LOC115715626	black	4.41068	4.29271	2.56216	1.90361	2.46358	1.33232	2.11101	3.844	CNGC1	At5g53130	Cyclic nucleotide-gated ion channel 1	GeneID:115715626	GO:0016021,GO:0005886,GO:0005516,GO:0030552,GO:0030553,GO:0005216	integral component of membrane|plasma membrane|calmodulin binding|cAMP binding|cGMP binding|ion channel activity	ko04626	Plant-pathogen interaction
LOC115715627	black	4.97444	5.12756	4.40768	4.28649	4.2904	3.70367	3.59223	4.85116	ATL6	At3g05200	E3 ubiquitin-protein ligase ATL6	GeneID:115715627	GO:0016021,GO:0005886,GO:0046872,GO:0004842,GO:0009816,GO:0009814,GO:0016567,GO:0010200	integral component of membrane|plasma membrane|metal ion binding|ubiquitin-protein transferase activity|defense response to bacterium, incompatible interaction|defense response, incompatible interaction|protein ubiquitination|response to chitin
LOC115715641	black	4.02729	3.85093	3.60502	3.89523	5.42397	0.0417204	4.53954	4.07799	D27	At1g03055	Beta-carotene isomerase D27, chloroplastic	GeneID:115715641	GO:0009507,GO:0009536,GO:0016859,GO:0005506,GO:0010223,GO:1901601	chloroplast|plastid|cis-trans isomerase activity|iron ion binding|secondary shoot formation|strigolactone biosynthetic process
LOC115715660	black	4.53543	4.81023	4.5087	4.32403	3.96622	3.29909	3.64828	3.731		At4g27745	Protein yippee-like At4g27745	GeneID:115715660	GO:0046872	metal ion binding
LOC115715781	black	3.40916	3.62426	3.12464	2.42125	2.25194	1.9667	3.22238	3.07578	DLO2	At4g10490	Protein DMR6-LIKE OXYGENASE 2	GeneID:115715781	GO:0051213,GO:0046872,GO:0002229,GO:0046244	dioxygenase activity|metal ion binding|defense response to oomycetes|salicylic acid catabolic process
LOC115715813	black	3.40048	3.63562	2.71488	3.07127	1.84395	0.901541	2.27674	1.17837	PP2A13	At3g61060	F-box protein PP2-A13	GeneID:115715813	GO:0005634,GO:0016567	nucleus|protein ubiquitination
LOC115715820	black	2.56076	2.73577	1.63186	1.80998	1.21125	1.44807	1.56307	2.06921	DTX49	At4g23030	Protein DETOXIFICATION 49	GeneID:115715820	GO:0016021,GO:0015297,GO:0015238,GO:0006855	integral component of membrane|antiporter activity|drug transmembrane transporter activity|drug transmembrane transport
LOC115715830	black	3.17365	3.03855	3.02629	2.98108	2.48663	0.735038	0.496227	1.87794				GeneID:115715830
LOC115715836	black	8.26607	8.40675	8.00118	8.19026	7.64074	6.95902	7.91028	7.30149		At1g62810	Primary amine oxidase	GeneID:115715836	GO:0052595,GO:0052594,GO:0005507,GO:0052596,GO:0008131,GO:0048038,GO:0052593,GO:0009738,GO:0009308,GO:0006809	aliphatic-amine oxidase activity|aminoacetone:oxygen oxidoreductase(deaminating) activity|copper ion binding|phenethylamine:oxygen oxidoreductase (deaminating) activity|primary amine oxidase activity|quinone binding|tryptamine:oxygen oxidoreductase (deaminating) activity|abscisic acid-activated signaling pathway|amine metabolic process|nitric oxide biosynthetic process	ko00260,ko00350,ko00360,ko00410,ko00950,ko00960	Glycine, serine and threonine metabolism|Tyrosine metabolism|Phenylalanine metabolism|beta-Alanine metabolism|Isoquinoline alkaloid biosynthesis|Tropane, piperidine and pyridine alkaloid biosynthesis
LOC115715870	black	2.75681	3.22645	2.05453	2.06443	2.02407	1.44219	1.90497	1.76969	SFH11	At5g47510	Phosphatidylinositol/phosphatidylcholine transfer protein SFH11	GeneID:115715870	GO:0000139,GO:0005886,GO:0015031	Golgi membrane|plasma membrane|protein transport
LOC115716003	black	1.65051	1.82155	1.2052	0.279582	1.31108	0.979196	0.386694	0.710254	ERN1	MTR_7g085810	Ethylene-responsive transcription factor ERN1	GeneID:115716003	GO:0005634,GO:0003700,GO:0043565,GO:0009877,GO:0045893	nucleus|DNA-binding transcription factor activity|sequence-specific DNA binding|nodulation|positive regulation of transcription, DNA-templated
LOC115716034	black	3.42096	2.95573	3.31212	3.26018	3.03409	1.56479	3.52374	2.75561	MO2	At4g38540	Monooxygenase 2	GeneID:115716034	GO:0071949,GO:0004497,GO:0002239	FAD binding|monooxygenase activity|response to oomycetes
LOC115716132	black	5.58733	5.72754	5.58751	5.53197	5.03775	4.03207	5.28493	4.7808	4CLL9	At5g63380	4-coumarate--CoA ligase-like 9	GeneID:115716132	GO:0005777,GO:0005524,GO:0004321,GO:0016874,GO:0009695,GO:0031408	peroxisome|ATP binding|fatty-acyl-CoA synthase activity|ligase activity|jasmonic acid biosynthetic process|oxylipin biosynthetic process
LOC115716187	black	7.46146	7.69341	6.75923	7.74922	8.16901	6.51281	6.7477	7.11068	PSRP1		Ribosome-binding factor PSRP1, chloroplastic	GeneID:115716187	GO:0009570,GO:0019843,GO:0044238,GO:0006417	chloroplast stroma|rRNA binding|primary metabolic process|regulation of translation
LOC115716315	black	6.55474	7.38121	5.87819	6.10138	6.76857	5.69123	6.22968	6.35911	AAE6	At5g16340	Probable acyl-activating enzyme 6	GeneID:115716315	GO:0016874,GO:0006631	ligase activity|fatty acid metabolic process
LOC115716485	black	5.07213	5.60618	4.91853	4.91572	5.14276	4.30536	4.16996	4.15794	LOL1	At1g32540	Protein LOL1	GeneID:115716485	GO:0005634,GO:0003677,GO:0009814,GO:0009626,GO:0034052,GO:0043068,GO:2000121	nucleus|DNA binding|defense response, incompatible interaction|plant-type hypersensitive response|positive regulation of plant-type hypersensitive response|positive regulation of programmed cell death|regulation of removal of superoxide radicals
LOC115716486	black	5.02472	3.97412	4.36884	5.23407	3.79365	2.24858	2.57887	2.78919				GeneID:115716486
LOC115716605	black	2.04884	2.61904	3.22281	2.96747	3.4364	0.835	3.54045	3.59895			Myrcene synthase, chloroplastic	GeneID:115716605	GO:0031969,GO:0016021,GO:0000287,GO:0050551,GO:0016114	chloroplast membrane|integral component of membrane|magnesium ion binding|myrcene synthase activity|terpenoid biosynthetic process
LOC115716655	black	4.49495	4.44267	4.31896	4.37468	4.29422	3.099	3.36302	3.75395	SLK2	At5g62090	Probable transcriptional regulator SLK2	GeneID:115716655	GO:0005634,GO:0005667,GO:0001102,GO:0030154,GO:0009793,GO:0048467,GO:0007275,GO:1901001,GO:0000122,GO:0045892,GO:0048481,GO:0045944,GO:0047484,GO:0010044	nucleus|transcription factor complex|RNA polymerase II activating transcription factor binding|cell differentiation|embryo development ending in seed dormancy|gynoecium development|multicellular organism development|negative regulation of response to salt stress|negative regulation of transcription by RNA polymerase II|negative regulation of transcription, DNA-templated|plant ovule development|po…
LOC115716727	black	5.50107	6.97001	5.57517	4.80923	5.63755	4.83851	4.545	4.2255	TIP2-2	At4g17340	Probable aquaporin TIP2-2	GeneID:115716727	GO:0042807,GO:0009507,GO:0016021,GO:0009705,GO:0005774,GO:0005773,GO:0015250	central vacuole|chloroplast|integral component of membrane|plant-type vacuole membrane|vacuolar membrane|vacuole|water channel activity
LOC115716732	black	6.35824	6.53631	5.73826	6.06578	5.25361	4.60078	4.78156	5.04518	XTH30	At1g32170	Probable xyloglucan endotransglucosylase/hydrolase protein 30	GeneID:115716732	GO:0048046,GO:0005618,GO:0004553,GO:0016762,GO:0042546,GO:0071555,GO:0010411	apoplast|cell wall|hydrolase activity, hydrolyzing O-glycosyl compounds|xyloglucan:xyloglucosyl transferase activity|cell wall biogenesis|cell wall organization|xyloglucan metabolic process
LOC115716776	black	5.76004	6.02099	5.04711	5.77553	5.39036	4.40445	5.15813	4.79105				GeneID:115716776
LOC115717084	black	5.79244	7.21474	5.22644	4.67436	6.06954	3.66655	4.93048	5.03254	BCAT2	At1g10070	Branched-chain-amino-acid aminotransferase 2, chloroplastic	GeneID:115717084	GO:0009507,GO:0004084,GO:0052656,GO:0052654,GO:0052655,GO:0009097,GO:0009098,GO:0071669,GO:0009099	chloroplast|branched-chain-amino-acid transaminase activity|L-isoleucine transaminase activity|L-leucine transaminase activity|L-valine transaminase activity|isoleucine biosynthetic process|leucine biosynthetic process|plant-type cell wall organization or biogenesis|valine biosynthetic process	ko00270,ko00280,ko00290,ko00770,ko00966	Cysteine and methionine metabolism|Valine, leucine and isoleucine degradation|Valine, leucine and isoleucine biosynthesis|Pantothenate and CoA biosynthesis|Glucosinolate biosynthesis
LOC115717162	black	1.90568	1.80839	2.46647	2.88698	1.78944	0.528129	1.03505	0.908675	MT1		Sphingolipid C9-methyltransferase 1	GeneID:115717162	GO:0016021,GO:0008168,GO:0008610,GO:0006665	integral component of membrane|methyltransferase activity|lipid biosynthetic process|sphingolipid metabolic process
LOC115717371	black	4.60679	4.6407	4.57103	4.51756	4.14031	3.19737	4.14347	3.80941				GeneID:115717371
LOC115717646	black	2.35665	2.59157	2.50154	1.80348	2.17008	0	2.67522	1.11486	IQM2	At3g13600	IQ domain-containing protein IQM2	GeneID:115717646	GO:0005737,GO:0005634	cytoplasm|nucleus
LOC115718049	black	5.90668	5.86006	6.35461	5.93304	5.24045	4.64226	5.35987	5.38572	CYP81D11	At3g28740	Cytochrome P450 81D11	GeneID:115718049	GO:0016021,GO:0016020,GO:0020037,GO:0005506,GO:0016709,GO:0002213,GO:0042343	integral component of membrane|membrane|heme binding|iron ion binding|oxidoreductase activity,acting on paired donors, with incorporation or reduction of molecular oxygen, NAD(P)H as one donor, and incorporation of one atom of oxygen|defense response to insect|indole glucosinolate metabolic process
LOC115718171	black	4.2616	4.46732	3.52638	2.71364	3.2942	2.75784	2.54557	3.50865	EXLB1	Os07g0496250	Expansin-like B1	GeneID:115718171
LOC115718445	black	2.18256	2.73837	2.12118	1.69338	0.859579	0.583535	1.24778	1.29264		At4g27290	G-type lectin S-receptor-like serine/threonine-protein kinase At4g27290	GeneID:115718445
LOC115718447	black	3.16273	3.14233	2.86457	2.77166	3.02105	2.26859	1.73361	2.20486	2ODD19	Os08g0480200	2-oxoglutarate-dependent dioxygenase 19	GeneID:115718447	GO:0051213,GO:0046872,GO:0002229,GO:0010150,GO:0009617,GO:0009620,GO:0002239,GO:0009751,GO:0046244	dioxygenase activity|metal ion binding|defense response to oomycetes|leaf senescence|response to bacterium|response to fungus|response to oomycetes|response to salicylic acid|salicylic acid catabolic process
LOC115718454	black	3.13888	3.18385	3.06032	3.71805	2.77307	2.31951	1.98398	2.86262		At3g01520	Universal stress protein A-like protein	GeneID:115718454	GO:0005886,GO:0016208	plasma membrane|AMP binding
LOC115718458	black	1.85957	0.960345	2.0699	1.18379	1.5223	0.296564	1.75842	0.134174	SAUR22	At5g18050	Auxin-responsive protein SAUR22	GeneID:115718458	GO:0005886,GO:0009734,GO:0007275,GO:0040008	plasma membrane|auxin-activated signaling pathway|multicellular organism development|regulation of growth
LOC115718477	black	2.47091	2.3525	2.20739	2.46716	1.62514	1.06856	2.20565	1.54133	ABCG31	At2g29940	ABC transporter G family member 31	GeneID:115718477	GO:0016021,GO:0005886,GO:0009506,GO:0005524,GO:0042626,GO:0006855,GO:0055085	integral component of membrane|plasma membrane|plasmodesma|ATP binding|ATPase activity, coupled to transmembrane movement of substances|drug transmembrane transport|transmembrane transport
LOC115718532	black	5.2054	4.81306	5.95238	5.00169	3.63853	0.0522954	0.336663	3.02248	CFAT		Coniferyl alcohol acyltransferase	GeneID:115718532	GO:0050734,GO:0102406,GO:0052325,GO:0010345	hydroxycinnamoyltransferase activity|omega-hydroxypalmitate O-sinapoyl transferase activity|cell wall pectin biosynthetic process|suberin biosynthetic process
LOC115718683	black	4.4739	4.12693	5.09159	5.35026	4.82014	2.75369	2.61105	3.91208	FAR1	At5g22500	Fatty acyl-CoA reductase 1	GeneID:115718683	GO:0009507,GO:0005886,GO:0102965,GO:0080019,GO:0050062,GO:0006629,GO:0035336,GO:0009651,GO:0009611,GO:0010345	chloroplast|plasma membrane|alcohol-forming fatty acyl-CoA reductase activity|fatty-acyl-CoA reductase (alcohol-forming) activity|long-chain-fatty-acyl-CoA reductase activity|lipid metabolic process|long-chain fatty-acyl-CoA metabolic process|response to salt stress|response to wounding|suberin biosynthetic process	ko00073,ko04146	Cutin, suberine and wax biosynthesis|Peroxisome
LOC115718793	black	1.90905	1.93265	0.949261	0.408248	1.1963	0.841874	1.30025	1.32424	PUB24	At3g11840	E3 ubiquitin-protein ligase PUB24	GeneID:115718793	GO:0004842,GO:0006952	ubiquitin-protein transferase activity|defense response
LOC115718799	black	4.03799	3.93062	3.0527	2.37254	3.98586	2.55095	2.06846	3.15137			Chitinase 1	GeneID:115718799	GO:0008061,GO:0004568,GO:0006032,GO:0000272	chitin binding|chitinase activity|chitin catabolic process|polysaccharide catabolic process
LOC115718823	black	1.35208	0.842401	0.702544	1.09232	1.86102	0.364055	0.312928	0.677449		At1g18265	Protein FLOURY 1-like	GeneID:115718823	GO:0016021	integral component of membrane
LOC115718824	black	2.25332	2.44444	1.37762	1.83085	2.22868	0.961988	1.52624	1.83159				GeneID:115718824
LOC115718833	black	3.64228	3.31689	3.62144	3.34833	2.12614	0.638098	0.338059	2.08637				GeneID:115718833
LOC115718955	black	5.75347	5.8254	5.60047	5.75251	5.59635	4.21219	4.96441	4.87338	PPD		Pheophorbidase	GeneID:115718955	GO:0005737,GO:0052689,GO:0035560,GO:0042803,GO:0033310,GO:0070988,GO:0010150	cytoplasm|carboxylic ester hydrolase activity|pheophoridase activity|protein homodimerization activity|chlorophyll a catabolic process|demethylation|leaf senescence
LOC115718977	black	5.33985	5.37312	5.19216	5.43774	5.21804	3.69399	3.60665	4.99856		At5g03795	Probable glycosyltransferase At5g03795	GeneID:115718977	GO:0000139,GO:0016021,GO:0016757,GO:0071555,GO:0006486	Golgi membrane|integral component of membrane|transferase activity, transferring glycosyl groups|cell wall organization|protein glycosylation
LOC115718993	black	3.88041	4.49729	3.70459	3.56516	4.78825	3.36726	2.96483	3.93018	INVA	At1g56560	Alkaline/neutral invertase A, mitochondrial	GeneID:115718993	GO:0005739,GO:0033926,GO:0004575,GO:0042542,GO:0048364,GO:0005987	mitochondrion|glycopeptide alpha-N-acetylgalactosaminidase activity|sucrose alpha-glucosidase activity|response to hydrogen peroxide|root development|sucrose catabolic process
LOC115719140	black	6.88302	7.84803	6.59903	6.70676	7.16852	5.78163	6.3204	6.46491	IVD	At3g45300	Isovaleryl-CoA dehydrogenase, mitochondrial	GeneID:115719140	GO:0005759,GO:0005739,GO:0005524,GO:0050660,GO:0008470,GO:0009083,GO:0006552	mitochondrial matrix|mitochondrion|ATP binding|flavin adenine dinucleotide binding|isovaleryl-CoA dehydrogenase activity|branched-chain amino acid catabolic process|leucine catabolic process	ko00280	Valine, leucine and isoleucine degradation
LOC115719180	black	7.77888	8.92908	7.36716	7.49487	8.5256	6.60654	7.14899	7.28621	THA1	At1g08630	Probable low-specificity L-threonine aldolase 1	GeneID:115719180	GO:0005829,GO:0008732,GO:0004793,GO:0006545,GO:0006567	cytosol|L-allo-threonine aldolase activity|threonine aldolase activity|glycine biosynthetic process|threonine catabolic process	ko00260	Glycine, serine and threonine metabolism
LOC115719337	black	4.12398	4.4288	5.50801	5.19554	3.54263	0.0182377	0.210398	2.58719	OMT3		Probable O-methyltransferase 3	GeneID:115719337	GO:0008171,GO:0046983	O-methyltransferase activity|protein dimerization activity	ko00380	Tryptophan metabolism
LOC115719347	black	3.07067	4.18042	4.85894	5.77257	3.39965	0	0	1.25653	DSEL	At4g18550	Phospholipase A1-IIgamma	GeneID:115719347	GO:0005737,GO:0047372,GO:0008970,GO:0046340,GO:0019915,GO:0052651,GO:0010187	cytoplasm|acylglycerol lipase activity|phospholipase A1 activity|diacylglycerol catabolic process|lipid storage|monoacylglycerol catabolic process|negative regulation of seed germination
LOC115719465	black	5.08834	4.7229	5.74556	5.35069	5.10105	3.90115	3.81473	4.43047	CFAT		Coniferyl alcohol acyltransferase	GeneID:115719465	GO:0047172	shikimate O-hydroxycinnamoyltransferase activity
LOC115719619	black	3.54307	3.87501	2.99647	2.64349	3.35475	2.47082	1.48834	2.78272	BGLU12	Os04g0474800	Beta-glucosidase 12	GeneID:115719619	GO:0005576,GO:0033907,GO:0004565,GO:0080083,GO:0008422,GO:0047701,GO:0004338,GO:0102483,GO:0005975	extracellular region|beta-D-fucosidase activity|beta-galactosidase activity|beta-gentiobiose beta-glucosidase activity|beta-glucosidase activity|beta-L-arabinosidase activity|glucan exo-1,3-beta-glucosidase activity|scopolin beta-glucosidase activity|carbohydrate metabolic process
LOC115719630	black	11.1845	11.741	10.9105	11.3618	11.6793	9.64155	10.6683	10.6775	ASN1	At3g47340	Asparagine synthetase [glutamine-hydrolyzing] 1	GeneID:115719630	GO:0005829,GO:0004066,GO:0005524,GO:0042803,GO:0006529,GO:0009063,GO:0043617,GO:0006541,GO:0070981,GO:0009646,GO:0009750,GO:0009749,GO:0009744	cytosol|asparagine synthase (glutamine-hydrolyzing) activity|ATP binding|protein homodimerization activity|asparagine biosynthetic process|cellular amino acid catabolic process|cellular response to sucrose starvation|glutamine metabolic process|L-asparagine biosynthetic process|response to absence of light|response to fructose|response to glucose|response to sucrose	ko00250	Alanine, aspartate and glutamate metabolism
LOC115719667	black	8.68857	9.47472	8.79139	8.88962	9.38296	7.98118	8.60973	8.11777				GeneID:115719667
LOC115719896	black	4.13601	3.18283	4.16212	3.67005	3.30851	2.51237	3.04461	2.8584	CPK20	At2g38910	Calcium-dependent protein kinase 20	GeneID:115719896	GO:0005737,GO:0016020,GO:0005634,GO:0005524,GO:0005509,GO:0009931,GO:0004683,GO:0009738,GO:0035556,GO:0018105	cytoplasm|membrane|nucleus|ATP binding|calcium ion binding|calcium-dependent protein serine/threonine kinase activity|calmodulin-dependent protein kinase activity|abscisic acid-activated signaling pathway|intracellular signal transduction|peptidyl-serine phosphorylation	ko04626	Plant-pathogen interaction
LOC115720540	black	6.61529	6.5595	6.35828	5.71073	5.5494	4.35058	5.08255	4.77017	SCT	At2g25150	Spermidine coumaroyl-CoA acyltransferase	GeneID:115720540	GO:0080073,GO:0006596,GO:0008216	spermidine:coumaroyl CoA N-acyltransferase activity|polyamine biosynthetic process|spermidine metabolic process
LOC115720644	black	2.33875	2.07565	2.24569	1.94483	2.85645	2.0353	1.31598	1.32644				GeneID:115720644
LOC115720657	black	4.54548	4.71376	4.44829	3.82423	3.58687	1.93788	2.44093	4.61969		At2g27310	F-box protein At2g27310	GeneID:115720657
LOC115720731	black	4.67476	3.63159	3.07665	1.28542	2.81057	0	1.45425	1.91798			Basic form of pathogenesis-related protein 1	GeneID:115720731	GO:0005576,GO:0006952,GO:0009607	extracellular region|defense response|response to biotic stimulus	ko04016,ko04075,ko04626	MAPK signaling pathway - plant|Plant hormone signal transduction|Plant-pathogen interaction
LOC115720796	black	0.811209	1.07645	0.607171	0.570891	1.94128	0.0398417	0	1.07051	GA3OX1	At1g15550	Gibberellin 3-beta-dioxygenase 1	GeneID:115720796	GO:0005737,GO:0051213,GO:0016707,GO:0046872,GO:0009740,GO:0009686,GO:0009739,GO:0010114,GO:0009639,GO:0009845	cytoplasm|dioxygenase activity|gibberellin 3-beta-dioxygenase activity|metal ion binding|gibberellic acid mediated signaling pathway|gibberellin biosynthetic process|response to gibberellin|response to red light|response to red or far red light|seed germination	ko00904	Diterpenoid biosynthesis
LOC115720977	black	8.47165	7.74477	8.20139	7.98893	8.42006	6.4713	7.06731	6.57777	EXPA8	At2g40610	Expansin-A8	GeneID:115720977
LOC115721008	black	2.39868	2.53473	2.0782	2.40546	2.59287	1.1144	1.46612	0.752015	SAUR22	At5g18050	Auxin-responsive protein SAUR22	GeneID:115721008	GO:0005886,GO:0009734,GO:0007275,GO:0040008	plasma membrane|auxin-activated signaling pathway|multicellular organism development|regulation of growth
LOC115721013	black	2.58187	2.36222	3.26615	2.52942	2.20333	0.939444	1.00145	0.435912	SAUR22	At5g18050	Auxin-responsive protein SAUR22	GeneID:115721013	GO:0005886,GO:0009734,GO:0007275,GO:0040008	plasma membrane|auxin-activated signaling pathway|multicellular organism development|regulation of growth
LOC115721014	black	1.92008	1.36347	2.22496	1.81219	1.28292	0.53974	0.954187	1.18687			Auxin-induced protein 15A	GeneID:115721014	GO:0009734	auxin-activated signaling pathway	ko04075	Plant hormone signal transduction
LOC115721015	black	2.82962	1.49566	2.57704	2.52565	2.20262	1.37402	1.85028	0.919037			Auxin-induced protein X10A	GeneID:115721015	GO:0009734	auxin-activated signaling pathway	ko04075	Plant hormone signal transduction
LOC115721019	black	1.21862	1.31878	0.971149	0.710006	0.333282	0.0197062	0.0187148	0.460381	CRK29	At4g21410	Cysteine-rich receptor-like protein kinase 29	GeneID:115721019
LOC115721021	black	4.63448	4.17195	5.38186	4.89305	3.61152	1.88438	1.936	2.95621	CFAT		Coniferyl alcohol acyltransferase	GeneID:115721021	GO:0050734,GO:0102406,GO:0052325,GO:0010345	hydroxycinnamoyltransferase activity|omega-hydroxypalmitate O-sinapoyl transferase activity|cell wall pectin biosynthetic process|suberin biosynthetic process
LOC115721177	black	4.47994	4.51761	4.22094	4.4032	5.26971	3.69531	3.48452	4.40968				GeneID:115721177
LOC115721297	black	5.4281	6.21792	4.92581	4.9972	5.11988	3.52998	4.21094	4.09436	AAE2	At2g17650	Probable acyl-activating enzyme 2	GeneID:115721297	GO:0016874,GO:0006631	ligase activity|fatty acid metabolic process
LOC115721347	black	0.949297	1.26826	1.18828	1.33077	0.615837	0	0	0.177157				GeneID:115721347
LOC115721414	black	2.57497	2.57253	2.59342	2.39159	1.8448	1.18761	1.02597	1.54367	TOP3	YLR234W	DNA topoisomerase 3	GeneID:115721414	GO:0005634,GO:0031422,GO:0003677,GO:0003916,GO:0003917,GO:0006265,GO:0007064,GO:0007131,GO:0000018,GO:0007004	nucleus|RecQ helicase-Topo III complex|DNA binding|DNA topoisomerase activity|DNA topoisomerase type I activity|DNA topological change|mitotic sister chromatid cohesion|reciprocal meiotic recombination|regulation of DNA recombination|telomere maintenance via telomerase
LOC115721426	black	2.76777	3.07287	2.32341	2.6756	3.33028	2.20347	1.63007	2.44905	NPF59	At3g01350	Protein NRT1/ PTR FAMILY 5.9	GeneID:115721426	GO:0016021,GO:0035673,GO:1904680,GO:0015333	integral component of membrane|oligopeptide transmembrane transporter activity|peptide transmembrane transporter activity|peptide:proton symporter activity
LOC115721427	black	3.55604	2.84412	4.64754	4.287	2.51415	1.04527	0.197731	2.00239	CFAT		Coniferyl alcohol acyltransferase	GeneID:115721427	GO:0047172	shikimate O-hydroxycinnamoyltransferase activity
LOC115721787	black	4.4728	5.12421	4.71975	3.97744	3.91552	3.11935	3.31845	4.34562	PDR1		Pleiotropic drug resistance protein 1	GeneID:115721787	GO:0016021,GO:0005524,GO:0016887	integral component of membrane|ATP binding|ATPase activity
LOC115721809	black	2.76663	3.5411	2.17816	2.55513	2.3593	1.58499	2.16699	2.20595		At1g14780	MACPF domain-containing protein At1g14780	GeneID:115721809	GO:0005886,GO:0006955,GO:0009626	plasma membrane|immune response|plant-type hypersensitive response
LOC115721871	black	2.77166	3.41042	1.85362	1.2975	1.48056	1.28708	1.11907	3.11921	GAT1_21	At1g15040	Putative glutamine amidotransferase GAT1_2.1	GeneID:115721871	GO:0016787,GO:0016740,GO:0006541,GO:2000032	hydrolase activity|transferase activity|glutamine metabolic process|regulation of secondary shoot formation
LOC115721891	black	4.98047	4.88903	4.45072	3.78928	3.65595	3.45167	3.84648	3.92094	CYP75B137		Flavonoid 3'-monooxygenase CYP75B137	GeneID:115721891
LOC115722001	black	3.04456	2.92598	1.60426	1.25335	1.05914	0.439603	0.967095	1.51674		At3g50280	Uncharacterized acetyltransferase At3g50280	GeneID:115722001	GO:0016747	transferase activity, transferring acyl groups other than amino-acyl groups
LOC115722064	black	3.26537	2.96283	3.73042	3.83624	2.75651	0.476296	3.47744	2.76132	FAO1		Long-chain-alcohol oxidase FAO1	GeneID:115722064	GO:0016021,GO:0050660,GO:0046577,GO:0006066,GO:0055114,GO:0009409	integral component of membrane|flavin adenine dinucleotide binding|long-chain-alcohol oxidase activity|alcohol metabolic process|oxidation-reduction process|response to cold
LOC115722066	black	2.54097	3.59359	2.03125	1.33133	1.93475	1.58677	1.67249	2.08809	CML11	At3g22930	Calmodulin-like protein 11	GeneID:115722066	GO:0005634,GO:0005509,GO:0030234,GO:0019722,GO:0051300	nucleus|calcium ion binding|enzyme regulator activity|calcium-mediated signaling|spindle pole body organization	ko04626	Plant-pathogen interaction
LOC115722136	black	3.46413	3.18024	2.20065	2.05756	1.2087	1.30322	1.34208	2.01386			Lignin-forming anionic peroxidase	GeneID:115722136	GO:0005576,GO:0020037,GO:0046872,GO:0004601,GO:0042744,GO:0006979	extracellular region|heme binding|metal ion binding|peroxidase activity|hydrogen peroxide catabolic process|response to oxidative stress	ko00940	Phenylpropanoid biosynthesis
LOC115722232	black	4.80529	5.8115	4.66257	4.40992	5.13597	3.84808	4.34352	4.2975	BCE2	At3g06850	Lipoamide acyltransferase component of branched-chain alpha-keto acid dehydrogenase complex, mitochondrial	GeneID:115722232	GO:0005737,GO:0005759,GO:0005739,GO:0016407,GO:0004147,GO:0043754,GO:0031405,GO:0008270,GO:0043617,GO:0006633,GO:0009646,GO:0009744	cytoplasm|mitochondrial matrix|mitochondrion|acetyltransferase activity|dihydrolipoamide branched chain acyltransferase activity|dihydrolipoyllysine-residue (2-methylpropanoyl)transferase activity|lipoic acid binding|zinc ion binding|cellular response to sucrose starvation|fatty acid biosynthetic process|response to absence of light|response to sucrose	ko00280,ko00640	Valine, leucine and isoleucine degradation|Propanoate metabolism
LOC115722251	black	6.3531	7.35664	6.25835	5.8372	6.81899	5.50966	5.91685	6.06191	GDH1	At5g18170	Glutamate dehydrogenase 1	GeneID:115722251	GO:0005739,GO:0005524,GO:0050897,GO:0005507,GO:0004353,GO:0008270,GO:0006520,GO:0006807,GO:0009646,GO:0046686,GO:0009651	mitochondrion|ATP binding|cobalt ion binding|copper ion binding|glutamate dehydrogenase [NAD(P)+] activity|zinc ion binding|cellular amino acid metabolic process|nitrogen compound metabolic process|response to absence of light|response to cadmium ion|response to salt stress	ko00220,ko00250,ko00910	Arginine biosynthesis|Alanine, aspartate and glutamate metabolism|Nitrogen metabolism
LOC115722276	black	1.27018	3.2692	3.13714	2.5623	3.07274	0.139468	3.96482	2.09271	LOX1.5		Probable linoleate 9S-lipoxygenase 5	GeneID:115722276	GO:0005737,GO:0046872,GO:0016702,GO:0031408	cytoplasm|metal ion binding|oxidoreductase activity, acting on single donors with incorporation of molecular oxygen, incorporation of two atoms of oxygen|oxylipin biosynthetic process	ko00591	Linoleic acid metabolism
LOC115722334	black	6.67846	7.58432	5.76017	6.05004	6.56109	5.39981	6.60953	5.99413			CASP-like protein 1D1	GeneID:115722334	GO:0016021,GO:0005886,GO:0051539	integral component of membrane|plasma membrane|4 iron, 4 sulfur cluster binding
LOC115722337	black	4.40045	4.44938	3.77753	4.0812	4.16001	2.87124	3.76668	3.20773	NADKC	At1g04280	Calmodulin calcium-dependent NAD kinase	GeneID:115722337
LOC115722344	black	6.74553	7.03912	6.21689	5.68526	6.59417	5.23726	5.2522	6.54715	MST4	Os03g0218400	Sugar transport protein MST4	GeneID:115722344	GO:0005887,GO:0005351,GO:0005355,GO:0008645	integral component of plasma membrane|carbohydrate:proton symporter activity|glucose transmembrane transporter activity|hexose transmembrane transport
LOC115722366	black	6.42072	6.35805	6.11759	6.33421	5.5844	3.0006	5.13024	4.53899	BGAL9	At2g32810	Beta-galactosidase 9	GeneID:115722366	GO:0048046,GO:0005618,GO:0009505,GO:0005774,GO:0005773,GO:0004565,GO:0030246,GO:0005975	apoplast|cell wall|plant-type cell wall|vacuolar membrane|vacuole|beta-galactosidase activity|carbohydrate binding|carbohydrate metabolic process
LOC115722393	black	4.33752	4.03753	4.08947	4.07199	3.39743	0.932152	2.84602	3.36352	UGT75L17		Phloretin 4'-O-glucosyltransferase	GeneID:115722393	GO:0009507,GO:0016758	chloroplast|transferase activity, transferring hexosyl groups
LOC115722411	black	6.16704	6.36982	6.65234	6.11744	5.54557	5.03038	5.08467	6.04469	ILL2	At5g56660	IAA-amino acid hydrolase ILR1-like 2	GeneID:115722411	GO:0005783,GO:0005788,GO:0010179,GO:0010178,GO:0046872,GO:0009850	endoplasmic reticulum|endoplasmic reticulum lumen|IAA-Ala conjugate hydrolase activity|IAA-amino acid conjugate hydrolase activity|metal ion binding|auxin metabolic process
LOC115722414	black	5.49798	5.44605	5.80112	5.66248	5.23195	3.54998	3.43449	4.29446	CER26L	At3g23840	Protein ECERIFERUM 26-like	GeneID:115722414	GO:0009535,GO:0016747,GO:0071555,GO:0009555,GO:0042761	chloroplast thylakoid membrane|transferase activity, transferring acyl groups other than amino-acyl groups|cell wall organization|pollen development|very long-chain fatty acid biosynthetic process
LOC115722420	black	3.83587	3.74093	3.96492	3.58536	3.60116	1.20406	2.03027	3.00643	ALG2		Alpha-1,3/1,6-mannosyltransferase ALG2	GeneID:115722420	GO:0016021,GO:0004378,GO:0102704,GO:0006486	integral component of membrane|GDP-Man:Man1GlcNAc2-PP-Dol alpha-1,3-mannosyltransferase activity|GDP-Man:Man2GlcNAc2-PP-dolichol alpha-1,6-mannosyltransferase activity|protein glycosylation	ko00510,ko00513	N-Glycan biosynthesis|Various types of N-glycan biosynthesis
LOC115722425	black	5.41488	5.25443	5.10954	5.22472	5.2798	0.242009	5.55899	4.65532		At1g06650	1-aminocyclopropane-1-carboxylate oxidase homolog 3	GeneID:115722425	GO:0046872,GO:0016491	metal ion binding|oxidoreductase activity
LOC115722455	black	5.10131	5.08111	4.81431	4.95111	4.56092	3.36307	3.47409	3.51355	ATJ20	At4g13830	Chaperone protein dnaJ 20, chloroplastic	GeneID:115722455	GO:0009507,GO:0005634,GO:0061077,GO:1902395,GO:0010322	chloroplast|nucleus|chaperone-mediated protein folding|regulation of 1-deoxy-D-xylulose-5-phosphate synthase activity|regulation of isopentenyl diphosphate biosynthetic process, methylerythritol 4-phosphate pathway
LOC115722464	black	4.80431	5.46616	3.70762	4.92815	5.97753	2.23231	4.17728	5.60048			Cysteine proteinase inhibitor 10	GeneID:115722464	GO:0005576,GO:0004869,GO:0006952	extracellular region|cysteine-type endopeptidase inhibitor activity|defense response
LOC115722553	black	4.12361	3.98629	3.63593	4.05331	5.46887	2.58726	2.14489	3.65851	ABC1K3	At1g79600	Protein ACTIVITY OF BC1 COMPLEX KINASE 3, chloroplastic	GeneID:115722553	GO:0009507,GO:0010287,GO:0005524,GO:0004672,GO:0006995,GO:0009658,GO:0080177,GO:0050821,GO:1902171,GO:0009644,GO:0080183,GO:0010114,GO:0009414	chloroplast|plastoglobule|ATP binding|protein kinase activity|cellular response to nitrogen starvation|chloroplast organization|plastoglobule organization|protein stabilization|regulation of tocopherol cyclase activity|response to high light intensity|response to photooxidative stress|response to red light|response to water deprivation
LOC115722614	black	5.17733	5.10424	3.98118	4.92279	4.65256	3.99758	3.94039	4.6285	SUS7	Os04g0249500	Sucrose synthase 7	GeneID:115722614	GO:0005737,GO:0016020,GO:0016157,GO:0005985	cytoplasm|membrane|sucrose synthase activity|sucrose metabolic process	ko00500	Starch and sucrose metabolism
LOC115722728	black	6.13145	7.82011	6.93683	5.03314	6.74811	6.13682	6.2001	6.04292		At5g18840	Sugar transporter ERD6-like 16	GeneID:115722728	GO:0005887,GO:0005351,GO:0005355,GO:0008645	integral component of plasma membrane|carbohydrate:proton symporter activity|glucose transmembrane transporter activity|hexose transmembrane transport
LOC115722833	black	6.90222	7.12797	7.01116	6.56105	7.03604	5.45278	5.91993	6.5706	GIP2		Probable aspartic proteinase GIP2	GeneID:115722833
LOC115722895	black	6.84605	7.57562	6.36457	6.7642	7.8438	5.30264	5.9597	6.19869	GIP2		Probable aspartic proteinase GIP2	GeneID:115722895
LOC115722915	black	4.84984	5.56347	4.71051	4.53679	5.11526	3.88338	4.10251	4.53459	ETFQO	At2g43400	Electron transfer flavoprotein-ubiquinone oxidoreductase, mitochondrial	GeneID:115722915	GO:0031305,GO:0005739,GO:0051539,GO:0009055,GO:0004174,GO:0046872,GO:0043783,GO:0048039,GO:0006552,GO:0009646	integral component of mitochondrial inner membrane|mitochondrion|4 iron, 4 sulfur cluster binding|electron transfer activity|electron-transferring-flavoprotein dehydrogenase activity|metal ion binding|oxidoreductase activity, oxidizing metal ions with flavin as acceptor|ubiquinone binding|leucine catabolic process|response to absence of light
LOC115722982	black	7.85943	8.4801	7.34683	7.76401	8.46385	6.6501	7.23373	8.17337			Uncharacterized protein C24B11.05	GeneID:115722982	GO:0005829,GO:0005634,GO:0008253,GO:0008252,GO:0009166,GO:0006206	cytosol|nucleus|5'-nucleotidase activity|nucleotidase activity|nucleotide catabolic process|pyrimidine nucleobase metabolic process
LOC115722983	black	2.40619	3.45816	1.84935	1.1951	1.27745	0.966892	1.3121	1.45521	PMP22	At4g04470	Peroxisomal membrane protein PMP22	GeneID:115722983	GO:0005737,GO:0016021,GO:0005778	cytoplasm|integral component of membrane|peroxisomal membrane	ko04146	Peroxisome
LOC115723004	black	4.16307	3.87213	2.93474	3.68848	4.29082	2.20209	3.45619	3.05757	GRXS4	At4g15680	Monothiol glutaredoxin-S4	GeneID:115723004	GO:0005737,GO:0005634,GO:0051537,GO:0009055,GO:0046872,GO:0015035,GO:0045454	cytoplasm|nucleus|2 iron, 2 sulfur cluster binding|electron transfer activity|metal ion binding|protein disulfide oxidoreductase activity|cell redox homeostasis
LOC115723006	black	7.40814	7.76699	6.25681	5.76856	6.9057	5.32021	6.21693	6.3945	GIP2		Probable aspartic proteinase GIP2	GeneID:115723006
LOC115723010	black	6.8241	7.04868	6.35041	6.0765	8.0234	5.8118	5.07755	5.13706	BAM1	At3g23920	Beta-amylase 1, chloroplastic	GeneID:115723010	GO:0009507,GO:0005829,GO:0005634,GO:0102229,GO:0016161,GO:0009414,GO:0005983	chloroplast|cytosol|nucleus|amylopectin maltohydrolase activity|beta-amylase activity|response to water deprivation|starch catabolic process	ko00500	Starch and sucrose metabolism
LOC115723050	black	3.80886	2.68722	1.95734	1.5026	2.34034	1.27586	1.40307	2.92632	ERF1B	At3g23240	Ethylene-responsive transcription factor 1B	GeneID:115723050	GO:0005634,GO:0003677,GO:0003700,GO:0006952,GO:0009873,GO:0009867	nucleus|DNA binding|DNA-binding transcription factor activity|defense response|ethylene-activated signaling pathway|jasmonic acid mediated signaling pathway	ko04016,ko04075	MAPK signaling pathway - plant|Plant hormone signal transduction
LOC115723064	black	0.207623	1.82905	0.292939	0	0	0	0	0			Lignin-forming anionic peroxidase	GeneID:115723064	GO:0005576,GO:0020037,GO:0046872,GO:0004601,GO:0042744,GO:0006979	extracellular region|heme binding|metal ion binding|peroxidase activity|hydrogen peroxide catabolic process|response to oxidative stress	ko00940	Phenylpropanoid biosynthesis
LOC115723179	black	3.40765	3.86516	2.66584	2.45369	3.13211	2.29584	2.1416	2.70423				GeneID:115723179
LOC115723269	black	3.65581	3.80051	2.7017	1.61925	3.03416	1.73584	1.65809	3.10531	GIP2		Probable aspartic proteinase GIP2	GeneID:115723269
LOC115723310	black	4.03604	3.88396	3.8354	3.83327	4.68201	2.39298	2.6475	4.13816	PP2B10	At2g02360	F-box protein PP2-B10	GeneID:115723310	GO:0030246,GO:0016567	carbohydrate binding|protein ubiquitination
LOC115723377	black	5.90595	5.36028	6.74144	5.88419	6.01034	5.1066	4.93511	5.2286	EXPA11	At1g20190	Expansin-A11	GeneID:115723377
LOC115723422	black	5.92806	5.63283	4.42695	5.7405	5.97742	4.03598	4.94418	5.53654	GOLS1		Galactinol synthase 1	GeneID:115723422	GO:0005737,GO:0047216,GO:0046872,GO:0052576,GO:0070417,GO:0006012,GO:0010325	cytoplasm|inositol 3-alpha-galactosyltransferase activity|metal ion binding|carbohydrate storage|cellular response to cold|galactose metabolic process|raffinose family oligosaccharide biosynthetic process	ko00052	Galactose metabolism
LOC115723428	black	6.61351	8.02431	6.33724	6.52323	7.24639	5.07738	4.17229	5.73092	GSDA	At5g28050	Guanosine deaminase	GeneID:115723428	GO:0005737,GO:0005634,GO:0047974,GO:0008270,GO:0006152	cytoplasm|nucleus|guanosine deaminase activity|zinc ion binding|purine nucleoside catabolic process
LOC115723486	black	7.45277	7.15237	6.97195	5.35022	5.76136	5.02431	4.8744	5.94046	HGN1		Glucan endo-1,3-beta-glucosidase major form	GeneID:115723486	GO:0005773,GO:0042973,GO:0005975,GO:0006952	vacuole|glucan endo-1,3-beta-D-glucosidase activity|carbohydrate metabolic process|defense response
LOC115723785	black	5.80529	6.30145	5.44997	5.42938	6.15729	4.76476	4.87121	5.57188	ETFB	At5g43430	Electron transfer flavoprotein subunit beta, mitochondrial	GeneID:115723785	GO:0005829,GO:0005759,GO:0005739,GO:0009055,GO:0015996,GO:0006552	cytosol|mitochondrial matrix|mitochondrion|electron transfer activity|chlorophyll catabolic process|leucine catabolic process
LOC115724075	black	2.82871	1.40268	2.13565	2.76477	2.51957	1.244	1.62766	1.71679				GeneID:115724075
LOC115724183	black	8.70708	9.8605	8.27259	8.66752	8.98643	7.46455	8.18893	8.42631	BXL1	At5g49360	Beta-D-xylosidase 1	GeneID:115724183	GO:0048046,GO:0009505,GO:0046556,GO:0009044,GO:0031222,GO:0010214,GO:0045493	apoplast|plant-type cell wall|alpha-L-arabinofuranosidase activity|xylan 1,4-beta-xylosidase activity|arabinan catabolic process|seed coat development|xylan catabolic process
LOC115724186	black	4.87092	5.26336	5.20655	4.13875	5.263	4.25857	3.20405	3.39029		At5g08350	GEM-like protein 4	GeneID:115724186
LOC115724449	black	2.21024	1.56088	1.76292	1.2369	1.56023	0.914598	0.275076	1.6097	XTH23	At4g25810	Probable xyloglucan endotransglucosylase/hydrolase protein 23	GeneID:115724449	GO:0048046,GO:0005618,GO:0005794,GO:0004553,GO:0016762,GO:0042546,GO:0071555,GO:0010411	apoplast|cell wall|Golgi apparatus|hydrolase activity, hydrolyzing O-glycosyl compounds|xyloglucan:xyloglucosyl transferase activity|cell wall biogenesis|cell wall organization|xyloglucan metabolic process	ko04075	Plant hormone signal transduction
LOC115724457	black	4.53324	4.8689	3.77224	4.11923	4.5327	3.10555	3.89246	3.73763	45203	At3g20660	Organic cation/carnitine transporter 4	GeneID:115724457	GO:0009535,GO:0016021,GO:0009705,GO:0005524,GO:0022857,GO:0042631,GO:0006811	chloroplast thylakoid membrane|integral component of membrane|plant-type vacuole membrane|ATP binding|transmembrane transporter activity|cellular response to water deprivation|ion transport
LOC115724505	black	9.22985	9.45624	9.14722	9.29205	8.3871	6.69053	7.78874	7.73197		At4g30420	WAT1-related protein At4g30420	GeneID:115724505	GO:0016021,GO:0005886,GO:0022857	integral component of membrane|plasma membrane|transmembrane transporter activity
LOC115724544	black	2.23456	2.20215	2.01392	2.01829	1.54858	0.185081	1.46655	1.02541				GeneID:115724544
LOC115724568	black	4.40613	4.53343	4.52851	4.35881	3.07416	1.64405	0.89649	2.65847	pyr-7		CTP synthase	GeneID:115724568	GO:0005524,GO:0003883,GO:0044210,GO:0006541	ATP binding|CTP synthase activity|'de novo' CTP biosynthetic process|glutamine metabolic process	ko00240	Pyrimidine metabolism
LOC115724694	black	2.27649	1.69812	2.52719	1.81628	1.05951	0.141234	1.07268	0.782698	RLP35	At3g11080	Receptor-like protein 35	GeneID:115724694	GO:0016021,GO:0005886	integral component of membrane|plasma membrane
LOC115724705	black	5.23829	4.20891	5.34825	6.37459	2.96945	0.213177	1.45907	2.4817	CHIT5		Class V chitinase CHIT5	GeneID:115724705			ko00520	Amino sugar and nucleotide sugar metabolism
LOC115724759	black	2.45969	2.84584	1.87291	1.0279	1.64413	0.815515	0.875132	1.66466	PER45	At4g30170	Peroxidase 45	GeneID:115724759	GO:0005576,GO:0020037,GO:0046872,GO:0004601,GO:0042744,GO:0006979	extracellular region|heme binding|metal ion binding|peroxidase activity|hydrogen peroxide catabolic process|response to oxidative stress	ko00940	Phenylpropanoid biosynthesis
LOC115724767	black	2.40842	1.69924	2.78226	2.4992	1.86893	0.422768	2.88972	1.55527	CYP71D10		Cytochrome P450 71D10	GeneID:115724767	GO:0016020,GO:0020037,GO:0005506,GO:0016709	membrane|heme binding|iron ion binding|oxidoreductase activity,acting on paired donors, with incorporation or reduction of molecular oxygen, NAD(P)H as one donor, and incorporation of one atom of oxygen
LOC115724771	black	4.52079	5.25084	3.83666	3.02306	4.40801	1.94113	2.93881	3.30984				GeneID:115724771
LOC115724829	black	6.62824	7.79743	6.73027	6.29025	6.89264	6.10257	6.15595	6.20891	RFS6	At5g20250	Probable galactinol--sucrose galactosyltransferase 6	GeneID:115724829	GO:0047274,GO:0010325	galactinol-sucrose galactosyltransferase activity|raffinose family oligosaccharide biosynthetic process	ko00052	Galactose metabolism
LOC115724869	black	2.84331	2.97171	2.36444	1.66245	2.34685	0.708345	1.08451	1.36086	MYB102	At4g21440	Transcription factor MYB102	GeneID:115724869	GO:0005634,GO:0003700,GO:0043565,GO:0044212,GO:0030154,GO:0006952,GO:0006355,GO:0009737,GO:0006970,GO:0009651,GO:0009611	nucleus|DNA-binding transcription factor activity|sequence-specific DNA binding|transcription regulatory region DNA binding|cell differentiation|defense response|regulation of transcription, DNA-templated|response to abscisic acid|response to osmotic stress|response to salt stress|response to wounding
LOC115724871	black	3.23684	3.48326	2.53822	4.19521	4.42217	2.15959	1.76628	3.44704				GeneID:115724871
LOC115724889	black	2.17524	1.93772	2.92674	2.84012	2.06971	1.07883	2.77332	1.91882	SSL13	At3g59530	Protein STRICTOSIDINE SYNTHASE-LIKE 13	GeneID:115724889	GO:0005783,GO:0016020,GO:0005773,GO:0009058,GO:0009555,GO:0010584	endoplasmic reticulum|membrane|vacuole|biosynthetic process|pollen development|pollen exine formation
LOC115724944	black	5.90445	6.48825	5.37773	5.55758	6.11801	4.40825	5.29969	5.40914	TPS11	At2g18700	Probable alpha,alpha-trehalose-phosphate synthase [UDP-forming] 11	GeneID:115724944	GO:0005737,GO:0005829,GO:0005739,GO:0016757,GO:0016311,GO:0005992,GO:0070413	cytoplasm|cytosol|mitochondrion|transferase activity, transferring glycosyl groups|dephosphorylation|trehalose biosynthetic process|trehalose metabolism in response to stress	ko00500	Starch and sucrose metabolism
LOC115725057	black	3.84172	4.98322	3.63801	4.16362	3.51229	1.55905	2.19721	2.79389			Malate synthase, glyoxysomal	GeneID:115725057	GO:0009514,GO:0004474,GO:0006097,GO:0006099	glyoxysome|malate synthase activity|glyoxylate cycle|tricarboxylic acid cycle	ko00620,ko00630	Pyruvate metabolism|Glyoxylate and dicarboxylate metabolism
LOC115725094	black	9.66196	9.61552	9.42861	8.99042	8.61559	8.27357	8.21687	9.29536			Cucumber peeling cupredoxin	GeneID:115725094	GO:0009055,GO:0046872	electron transfer activity|metal ion binding
LOC115725109	black	5.52569	6.93086	4.66346	5.33964	6.54807	3.86866	4.66815	5.06173				GeneID:115725109
LOC115725166	black	1.81951	1.53932	2.46275	1.64378	2.27489	0.964362	1.37495	0.819398			Auxin-induced protein X10A	GeneID:115725166	GO:0009734	auxin-activated signaling pathway	ko04075	Plant hormone signal transduction
LOC115725234	black	3.88016	3.66556	4.14215	3.87656	3.33778	0.0479614	2.73642	2.61808	9DC2		Receptor-like protein 9DC2	GeneID:115725234	GO:0016021,GO:0005886,GO:0050832	integral component of membrane|plasma membrane|defense response to fungus
LOC115725246	black	1.35687	1.17682	1.54392	1.07674	1.3674	0	1.4798	0.857617	RLP6	At1g45616	Receptor-like protein 6	GeneID:115725246	GO:0016021,GO:0016020,GO:0005886	integral component of membrane|membrane|plasma membrane
LOC115725290	black	3.6602	4.37311	2.8345	2.63972	3.70001	2.58709	2.70744	3.45907				GeneID:115725290
LOC115725407	black	3.63795	3.71451	4.45836	3.83003	3.88795	2.53723	2.80877	3.37948	AS		Hydroquinone glucosyltransferase	GeneID:115725407	GO:0050505	hydroquinone glucosyltransferase activity
LOC115725598	black	3.54734	3.70296	2.57782	2.38996	3.3406	2.34223	2.29025	2.86449				GeneID:115725598
LOC115725612	black	5.37626	5.43357	4.23916	4.98608	5.01881	3.66814	2.78993	3.5653		At4g11680	E3 ubiquitin-protein ligase At4g11680	GeneID:115725612	GO:0016021,GO:0005774,GO:0046872,GO:0016740,GO:0016567	integral component of membrane|vacuolar membrane|metal ion binding|transferase activity|protein ubiquitination

## Sheet: darkgreen_146
Supplementary Table S6: Genes of module (XLS).
darkgreen module
Gene id	Modules	Cs4XF1	Cs4XF2	Cs4XF3	Cs4XF4	Cs2XF1	Cs2XF2	Cs2XF3	Cs2XF4	gene_symbol	gene_homologs	description	gene_Dbxref	GO_id	GO_term	pathway	pathway_description
LOC115694734	darkgreen	0.804792	1.06201	1.7968	0.172032	0.242548	1.45882	1.77912	0.9586	LAC17	At5g60020	Laccase-17	GeneID:115694734	GO:0048046,GO:0005507,GO:0052716,GO:0016491,GO:0016722,GO:0009809,GO:0046274,GO:0009698	apoplast|copper ion binding|hydroquinone:oxygen oxidoreductase activity|oxidoreductase activity|oxidoreductase activity, oxidizing metal ions|lignin biosynthetic process|lignin catabolic process|phenylpropanoid metabolic process
LOC115694837	darkgreen	1.43594	1.4516	1.23657	0.960558	0.0546875	1.49866	1.67552	0.550437	RSS3	Os11g0446000	Protein RICE SALT SENSITIVE 3	GeneID:115694837	GO:0005737,GO:0005634	cytoplasm|nucleus
LOC115695895	darkgreen	6.43137	6.64065	6.09366	6.84681	5.66044	7.40294	6.69272	6.81109	LTPG6	At1g55260	Non-specific lipid transfer protein GPI-anchored 6	GeneID:115695895	GO:0031225,GO:0005886,GO:0008289,GO:0006869	anchored component of membrane|plasma membrane|lipid binding|lipid transport
LOC115696631	darkgreen	2.71807	2.82617	2.93753	2.6019	0.476732	3.31295	3.46668	2.98697				GeneID:115696631
LOC115697232	darkgreen	4.86491	5.19635	5.66638	4.90929	4.04342	5.29637	5.71306	4.86103			Polyphenol oxidase, chloroplastic	GeneID:115697232	GO:0009543,GO:0004097,GO:0046872,GO:0046148	chloroplast thylakoid lumen|catechol oxidase activity|metal ion binding|pigment biosynthetic process	ko00350,ko00950	Tyrosine metabolism|Isoquinoline alkaloid biosynthesis
LOC115697697	darkgreen	3.64186	3.98755	4.14261	4.49581	2.98293	4.66525	5.17187	4.16542	HOMT1		Caffeic acid 3-O-methyltransferase 1	GeneID:115697697	GO:0047763,GO:0046983,GO:0009809	caffeate O-methyltransferase activity|protein dimerization activity|lignin biosynthetic process	ko00940	Phenylpropanoid biosynthesis
LOC115697784	darkgreen	0.440691	3.93203	3.65491	0.476556	0.428456	3.30481	4.01115	1.49			Probable U6 snRNA-associated Sm-like protein LSm4	GeneID:115697784	GO:0005681,GO:0003723,GO:0000398,GO:0000956	spliceosomal complex|RNA binding|mRNA splicing, via spliceosome|nuclear-transcribed mRNA catabolic process	ko03018,ko03040	RNA degradation|Spliceosome
LOC115698161	darkgreen	2.43363	2.74286	2.92151	2.28007	2.04132	3.11994	3.80061	3.14759	PYL4	At2g38310	Abscisic acid receptor PYL4	GeneID:115698161	GO:0005737,GO:0005634,GO:0005886,GO:0010427,GO:0042803,GO:0004864,GO:0038023,GO:0009738,GO:0080163	cytoplasm|nucleus|plasma membrane|abscisic acid binding|protein homodimerization activity|protein phosphatase inhibitor activity|signaling receptor activity|abscisic acid-activated signaling pathway|regulation of protein serine/threonine phosphatase activity	ko04016,ko04075	MAPK signaling pathway - plant|Plant hormone signal transduction
LOC115698619	darkgreen	2.11171	1.84943	2.33979	2.53945	0.547234	3.57687	3.30911	2.66851		At5g40230	WAT1-related protein At5g40230	GeneID:115698619	GO:0016021,GO:0005886,GO:0022857	integral component of membrane|plasma membrane|transmembrane transporter activity
LOC115698725	darkgreen	4.93882	5.01006	6.09029	5.62689	4.22381	5.89914	6.0064	5.11476	DHAR2	At1g75270	Glutathione S-transferase DHAR2	GeneID:115698725	GO:0005829,GO:0005886,GO:0043295,GO:0045174,GO:0004364,GO:0080151,GO:0010731	cytosol|plasma membrane|glutathione binding|glutathione dehydrogenase (ascorbate) activity|glutathione transferase activity|positive regulation of salicylic acid mediated signaling pathway|protein glutathionylation	ko00053,ko00480	Ascorbate and aldarate metabolism|Glutathione metabolism
LOC115698729	darkgreen	3.85117	3.92862	4.55831	3.61532	2.9022	3.58468	4.26901	3.20875	CYP85A	PHAVU_008G028800g	Cytochrome P450 85A	GeneID:115698729	GO:0016021,GO:0020037,GO:0005506,GO:0004497,GO:0016705	integral component of membrane|heme binding|iron ion binding|monooxygenase activity|oxidoreductase activity, acting on paired donors, with incorporation or reduction of molecular oxygen	ko00905	Brassinosteroid biosynthesis
LOC115699046	darkgreen	3.54919	3.54812	4.36553	3.77892	2.373	4.23522	3.48858	4.27783	Bp10		L-ascorbate oxidase homolog	GeneID:115699046	GO:0005576,GO:0005507,GO:0016491	extracellular region|copper ion binding|oxidoreductase activity
LOC115699160	darkgreen	3.57593	3.47586	4.79358	4.57323	3.7869	4.73945	4.3449	3.96731				GeneID:115699160
LOC115699181	darkgreen	2.35814	2.44675	2.36594	2.33648	0.519157	2.22426	3.16221	1.84457				GeneID:115699181
LOC115699288	darkgreen	0.839852	0.961074	1.22672	1.08748	0	1.64515	2.3464	1.14067				GeneID:115699288
LOC115699453	darkgreen	4.06234	4.46182	5.03529	3.5305	2.71637	5.64458	5.22031	4.35615			Blue copper protein	GeneID:115699453	GO:0009055,GO:0046872	electron transfer activity|metal ion binding
LOC115701908	darkgreen	3.7176	2.83722	3.40952	3.92592	1.54359	4.1217	3.4386	3.57356		At1g75720	WEB family protein At1g75720	GeneID:115701908	GO:0005829,GO:0009904,GO:0009903	cytosol|chloroplast accumulation movement|chloroplast avoidance movement
LOC115702140	darkgreen	3.57176	3.40123	3.22303	3.21411	1.7113	3.50122	3.35374	2.841	RVE6	At5g52660	Protein REVEILLE 6	GeneID:115702140	GO:0005634,GO:0003677,GO:0003700,GO:0042752,GO:0009737,GO:0046686,GO:0009723,GO:0009739,GO:0009753,GO:0009751,GO:0009651	nucleus|DNA binding|DNA-binding transcription factor activity|regulation of circadian rhythm|response to abscisic acid|response to cadmium ion|response to ethylene|response to gibberellin|response to jasmonic acid|response to salicylic acid|response to salt stress
LOC115702357	darkgreen	2.36463	2.13077	2.53913	2.44185	0.984883	2.83109	2.08992	1.46379				GeneID:115702357
LOC115703022	darkgreen	3.45761	3.47119	3.29709	3.04838	0.353053	4.55447	4.15648	3.7085	TIP41L	At4g34270	TIP41-like protein	GeneID:115703022	GO:0005829,GO:0007165,GO:0031929	cytosol|signal transduction|TOR signaling
LOC115703038	darkgreen	2.82633	2.82791	2.28508	2.7168	0.204912	3.76919	4.08136	3.89663	RHY1A	At1g49850	Probable E3 ubiquitin-protein ligase RHY1A	GeneID:115703038	GO:0046872,GO:0016740,GO:0016567	metal ion binding|transferase activity|protein ubiquitination
LOC115703140	darkgreen	4.36071	3.85873	4.51923	4.04799	1.37322	4.05543	5.51486	4.43079				GeneID:115703140
LOC115703567	darkgreen	2.57837	2.2287	2.57429	2.45862	1.86968	3.09497	3.02898	1.56273				GeneID:115703567
LOC115703581	darkgreen	4.2816	5.19923	5.15366	5.1703	3.62016	5.91661	4.91814	5.11988			Polyphenol oxidase, chloroplastic	GeneID:115703581	GO:0009543,GO:0004097,GO:0046872,GO:0046148	chloroplast thylakoid lumen|catechol oxidase activity|metal ion binding|pigment biosynthetic process	ko00350,ko00950	Tyrosine metabolism|Isoquinoline alkaloid biosynthesis
LOC115703939	darkgreen	6.57898	6.2146	5.76382	6.61826	4.92851	6.27561	5.98112	5.75983				GeneID:115703939
LOC115704199	darkgreen	2.68103	2.31574	3.47141	2.87702	1.69735	3.48912	3.12937	3.61909	DREB3	At5g11590	Dehydration-responsive element-binding protein 3	GeneID:115704199	GO:0005634,GO:0003700,GO:0043565,GO:0009873,GO:0045893	nucleus|DNA-binding transcription factor activity|sequence-specific DNA binding|ethylene-activated signaling pathway|positive regulation of transcription, DNA-templated
LOC115704295	darkgreen	8.22231	7.58553	8.2533	8.65566	7.13451	8.67585	7.91054	7.92729	MADS6	Os02g0682200	MADS-box transcription factor 6	GeneID:115704295	GO:0005634,GO:0003677,GO:0046983,GO:0000977,GO:0043565,GO:0000982,GO:0008134,GO:0044212,GO:0030154,GO:0009553,GO:0010582,GO:0048437,GO:0048449,GO:0048457,GO:0048459,GO:0080060,GO:0010022,GO:0007275,GO:0048481,GO:0045944,GO:0045893,GO:0048509,GO:0048316,GO:0080112,GO:0010094,GO:0010093,GO:0048833,GO:0048455	nucleus|DNA binding|protein dimerization activity|RNA polymerase II regulatory region sequence-specific DNA binding|sequence-specific DNA binding|transcription factor activity, RNA polymerase II proximal promoter sequence-specific DNA binding|transcription factor binding|transcription regulatory region DNA binding|cell differentiation|embryo sac development|floral meristem determinacy|floral orga…
LOC115704343	darkgreen	4.73108	3.44626	4.64977	3.17527	2.42156	4.65827	6.05717	4.07009				GeneID:115704343
LOC115704875	darkgreen	1.97881	1.90174	2.95818	2.58582	1.87292	3.22586	2.4365	2.62687				GeneID:115704875
LOC115704931	darkgreen	2.93637	3.14919	2.60448	2.36738	0	2.10999	3.29884	1.64378	PMEI11	At3g47380	Pectinesterase inhibitor 11	GeneID:115704931	GO:0048046,GO:0004857,GO:0046910,GO:0043086,GO:0071669	apoplast|enzyme inhibitor activity|pectinesterase inhibitor activity|negative regulation of catalytic activity|plant-type cell wall organization or biogenesis
LOC115704997	darkgreen	1.99119	1.52814	1.08975	1.68961	0.18029	1.84048	2.50212	2.13115	BAD1	At5g54610	Ankyrin repeat-containing protein BDA1	GeneID:115704997	GO:0016021,GO:0005886,GO:0045087,GO:0009751	integral component of membrane|plasma membrane|innate immune response|response to salicylic acid
LOC115705135	darkgreen	3.36595	3.53031	3.34394	3.28352	0.478995	2.47623	3.47776	2.14896		At3g06530	Uncharacterized protein At3g06530	GeneID:115705135	GO:0030686,GO:0032040,GO:0034455,GO:0030515,GO:0000462,GO:0045943	90S preribosome|small-subunit processome|t-UTP complex|snoRNA binding|maturation of SSU-rRNA from tricistronic rRNA transcript (SSU-rRNA, 5.8S rRNA, LSU-rRNA)|positive regulation of transcription by RNA polymerase I	ko03008	Ribosome biogenesis in eukaryotes
LOC115705136	darkgreen	4.55977	4.67402	4.41921	4.08766	0.128821	2.95639	4.11849	2.55905	LPL1	YOR059C	Lipid droplet phospholipase 1	GeneID:115705136
LOC115705217	darkgreen	4.34098	4.45705	5.39616	4.72342	3.80131	5.07042	4.80912	5.86939	GATA8	At3g54810	GATA transcription factor 8	GeneID:115705217	GO:0005634,GO:0003700,GO:0043565,GO:0008270,GO:0007623,GO:0045893,GO:0009845	nucleus|DNA-binding transcription factor activity|sequence-specific DNA binding|zinc ion binding|circadian rhythm|positive regulation of transcription, DNA-templated|seed germination
LOC115705276	darkgreen	2.64508	2.50608	2.15242	2.44643	0.100589	2.48816	3.68053	1.95748	MOS2	At1g33520	Protein MOS2	GeneID:115705276	GO:0005634,GO:0003723,GO:0009870,GO:0042742	nucleus|RNA binding|defense response signaling pathway, resistance gene-dependent|defense response to bacterium
LOC115705686	darkgreen	4.67404	5.04402	4.23023	4.39801	3.55254	5.1962	4.85428	4.38036	NYC1	Os01g0227100	Probable chlorophyll(ide) b reductase NYC1, chloroplastic	GeneID:115705686	GO:0009535,GO:0016021,GO:0009536,GO:0034256,GO:0016491,GO:0015996,GO:0010304	chloroplast thylakoid membrane|integral component of membrane|plastid|chlorophyll(ide) b reductase activity|oxidoreductase activity|chlorophyll catabolic process|PSII associated light-harvesting complex II catabolic process	ko00860	Porphyrin and chlorophyll metabolism
LOC115705887	darkgreen	3.33272	3.45609	3.32573	3.23979	1.52137	3.11577	3.05988	2.71785	aim22		Putative lipoate-protein ligase A	GeneID:115705887	GO:0005737,GO:0005739,GO:0005524,GO:0016979,GO:0009249	cytoplasm|mitochondrion|ATP binding|lipoate-protein ligase activity|protein lipoylation
LOC115705905	darkgreen	4.49941	3.88161	4.20321	4.34319	2.96392	3.86957	3.95616	3.41247		At4g01130	GDSL esterase/lipase At4g01130	GeneID:115705905	GO:0005576,GO:0016788,GO:0016042	extracellular region|hydrolase activity, acting on ester bonds|lipid catabolic process
LOC115706044	darkgreen	5.70783	5.3496	5.66032	5.1565	4.18728	5.88602	5.34147	5.44036	TIP4-1	At2g25810	Aquaporin TIP4-1	GeneID:115706044	GO:0042807,GO:0016021,GO:0009705,GO:0015250	central vacuole|integral component of membrane|plant-type vacuole membrane|water channel activity
LOC115706071	darkgreen	1.68991	2.21557	2.19159	1.94514	0.132863	3.37435	3.20097	2.40823				GeneID:115706071
LOC115706158	darkgreen	6.20511	6.04352	5.93545	6.08273	0.376721	5.16565	6.30617	3.98298			Peptide methionine sulfoxide reductase	GeneID:115706158	GO:0008113	peptide-methionine (S)-S-oxide reductase activity
LOC115706177	darkgreen	4.18749	4.84039	4.98411	4.02401	3.30706	5.21951	4.93278	4.79322	NFYA8	At1g17590	Nuclear transcription factor Y subunit A-8	GeneID:115706177	GO:0016602,GO:0003677,GO:0003700	CCAAT-binding factor complex|DNA binding|DNA-binding transcription factor activity
LOC115706431	darkgreen	3.02068	2.5878	2.5081	2.23011	1.09275	2.08691	2.56712	1.77157	KRP1	At4g27280	Calcium-binding protein KRP1	GeneID:115706431	GO:0005509,GO:0080167	calcium ion binding|response to karrikin
LOC115706470	darkgreen	5.68228	4.88284	5.81009	5.8369	4.71232	6.32938	5.95306	4.92239	FLZ13	At1g74940	FCS-Like Zinc finger 13	GeneID:115706470	GO:0005829,GO:0005634,GO:0019900,GO:0046872,GO:1902074	cytosol|nucleus|kinase binding|metal ion binding|response to salt
LOC115706480	darkgreen	4.27266	3.99849	5.37125	4.70969	3.5993	4.88606	4.12998	5.38315	CYP86A4	At1g01600	Cytochrome P450 86A4	GeneID:115706480	GO:0016021,GO:0018685,GO:0070330,GO:0020037,GO:0005506,GO:0006631	integral component of membrane|alkane 1-monooxygenase activity|aromatase activity|heme binding|iron ion binding|fatty acid metabolic process	ko00073	Cutin, suberine and wax biosynthesis
LOC115706511	darkgreen	3.5591	3.15111	3.05934	2.67067	0	4.03763	4.43695	2.28901				GeneID:115706511
LOC115706530	darkgreen	4.85665	4.8617	4.86479	4.86928	3.60917	4.97552	5.84888	4.42937	VCS	At3g13300	Enhancer of mRNA-decapping protein 4	GeneID:115706530	GO:0005829,GO:0005634,GO:0000932,GO:0003729,GO:0042803,GO:0071365,GO:0031087,GO:0009965,GO:0006402,GO:0006397,GO:0009791,GO:0010072,GO:0010071	cytosol|nucleus|P-body|mRNA binding|protein homodimerization activity|cellular response to auxin stimulus|deadenylation-independent decapping of nuclear-transcribed mRNA|leaf morphogenesis|mRNA catabolic process|mRNA processing|post-embryonic development|primary shoot apical meristem specification|root meristem specification
LOC115706577	darkgreen	2.65767	2.78302	2.65949	2.43967	0	1.807	2.99925	1.43067	PUB52	At5g61550	Serine/threonine-protein kinase	GeneID:115706577
LOC115706579	darkgreen	2.05437	1.64719	2.11134	2.2888	0	2.03786	2.24945	1.7889	MAN6	At5g01930	Mannan endo-1,4-beta-mannosidase 6	GeneID:115706579	GO:0005576,GO:0016985,GO:0046355,GO:0009845	extracellular region|mannan endo-1,4-beta-mannosidase activity|mannan catabolic process|seed germination	ko00051	Fructose and mannose metabolism
LOC115706583	darkgreen	3.51795	3.39314	3.45029	3.24803	0	2.58151	3.50417	2.30377	CBP3	YPL215W	Protein CBP3, mitochondrial	GeneID:115706583	GO:0061671,GO:0032592,GO:0005761,GO:0005739,GO:0043022,GO:0034551,GO:0070131	Cbp3p-Cbp6 complex|integral component of mitochondrial membrane|mitochondrial ribosome|mitochondrion|ribosome binding|mitochondrial respiratory chain complex III assembly|positive regulation of mitochondrial translation
LOC115706586	darkgreen	3.44314	3.45395	3.44768	3.46535	0.0337019	2.482	3.24196	1.85542	APS1		Acid phosphatase 1	GeneID:115706586	GO:0003993	acid phosphatase activity
LOC115706587	darkgreen	1.44904	1.3877	1.37072	1.62737	0.621007	1.86928	2.39594	1.44679	APM1	At4g33090	Aminopeptidase M1	GeneID:115706587	GO:0005737,GO:0005829,GO:0005783,GO:0031090,GO:0005886,GO:0004177,GO:0070006,GO:0010013,GO:0042277,GO:0008270,GO:0009926,GO:0043171,GO:0006508	cytoplasm|cytosol|endoplasmic reticulum|organelle membrane|plasma membrane|aminopeptidase activity|metalloaminopeptidase activity|N-1-naphthylphthalamic acid binding|peptide binding|zinc ion binding|auxin polar transport|peptide catabolic process|proteolysis
LOC115706654	darkgreen	2.80708	3.01209	3.15285	2.51296	1.34507	2.58465	3.58035	2.59726		At4g33100	Uncharacterized protein At4g33100	GeneID:115706654
LOC115706902	darkgreen	1.62363	1.66839	1.6071	1.97863	0	3.14371	3.19291	2.62317	SYM1		Protein SYM1	GeneID:115706902	GO:0016021,GO:0005743	integral component of membrane|mitochondrial inner membrane	ko04146	Peroxisome
LOC115706903	darkgreen	2.22215	2.22612	1.84321	1.87562	0	3.01253	2.73517	2.19359				GeneID:115706903
LOC115707131	darkgreen	3.74523	3.3075	3.66667	3.87641	0.373781	4.06701	4.86945	3.33349		At3g62400	Cytochrome c oxidase subunit 5C-2	GeneID:115707131	GO:0016021,GO:0005746	integral component of membrane|mitochondrial respiratory chain
LOC115707198	darkgreen	1.54057	1.4728	1.62737	1.71886	0.0253898	2.54326	2.6642	1.78869	SBT61	At5g19660	Subtilisin-like protease SBT6.1	GeneID:115707198	GO:0005794,GO:0000139,GO:0016021,GO:0004175,GO:0004252,GO:0006972,GO:0042538,GO:0006508	Golgi apparatus|Golgi membrane|integral component of membrane|endopeptidase activity|serine-type endopeptidase activity|hyperosmotic response|hyperosmotic salinity response|proteolysis	ko04141	Protein processing in endoplasmic reticulum
LOC115707746	darkgreen	4.24796	4.09389	5.19617	4.33928	3.57118	5.1161	4.2885	4.18065	Bp10		L-ascorbate oxidase homolog	GeneID:115707746	GO:0005576,GO:0005507,GO:0016491	extracellular region|copper ion binding|oxidoreductase activity
LOC115707933	darkgreen	6.21913	5.18575	6.58245	6.37021	2.22514	7.46806	7.35145	6.92557	BNM2A	BnaA08g02780D	BURP domain-containing protein BNM2A	GeneID:115707933	GO:0000326	protein storage vacuole
LOC115707934	darkgreen	10.4257	9.9863	10.8235	10.6633	1.52552	10.6909	8.73889	9.95737				GeneID:115707934
LOC115707937	darkgreen	4.98554	4.71389	6.44311	6.06083	1.59756	7.10994	5.18527	6.06291		At1g66100	Acidic protein	GeneID:115707937	GO:0005576,GO:0090729,GO:0006952	extracellular region|toxin activity|defense response
LOC115708004	darkgreen	3.0686	3.12566	3.10711	2.9332	2.23364	3.36959	4.05758	3.48074				GeneID:115708004
LOC115708153	darkgreen	3.85946	4.5683	5.17203	4.76958	3.33353	5.03336	4.58213	4.01422	CYP77A2		Cytochrome P450 77A2	GeneID:115708153	GO:0020037,GO:0005506,GO:0004497,GO:0016705	heme binding|iron ion binding|monooxygenase activity|oxidoreductase activity, acting on paired donors, with incorporation or reduction of molecular oxygen
LOC115708180	darkgreen	2.15179	2.01431	2.13859	2.00925	0.294429	2.64059	3.16935	1.75369	SYP31	At5g05760	Syntaxin-31	GeneID:115708180	GO:0009504,GO:0012505,GO:0005768,GO:0000139,GO:0016021,GO:0043231,GO:0031201,GO:0005484,GO:0000149,GO:0006888,GO:0006886,GO:0048278,GO:0006906	cell plate|endomembrane system|endosome|Golgi membrane|integral component of membrane|intracellular membrane-bounded organelle|SNARE complex|SNAP receptor activity|SNARE binding|ER to Golgi vesicle-mediated transport|intracellular protein transport|vesicle docking|vesicle fusion	ko04130	SNARE interactions in vesicular transport
LOC115708181	darkgreen	2.76761	1.27419	2.39721	3.01664	0.681822	3.26829	2.31479	1.86056	ASMT	At4g35160	Acetylserotonin O-methyltransferase	GeneID:115708181	GO:0005737,GO:0017096,GO:0008171,GO:0046983,GO:0008757,GO:0019438,GO:0030187	cytoplasm|acetylserotonin O-methyltransferase activity|O-methyltransferase activity|protein dimerization activity|S-adenosylmethionine-dependent methyltransferase activity|aromatic compound biosynthetic process|melatonin biosynthetic process
LOC115708186	darkgreen	1.4485	1.18227	1.52987	1.52949	0	2.63209	2.32911	1.58347	MYB1	At3g09230	Transcription factor MYB1	GeneID:115708186	GO:0005634,GO:0003677,GO:0003700,GO:0009751	nucleus|DNA binding|DNA-binding transcription factor activity|response to salicylic acid
LOC115708230	darkgreen	2.87077	2.84993	3.73116	3.34118	1.69094	3.45472	3.11354	3.52056	DREB3	At5g11590	Dehydration-responsive element-binding protein 3	GeneID:115708230	GO:0005634,GO:0003700,GO:0043565,GO:0009873,GO:0045893	nucleus|DNA-binding transcription factor activity|sequence-specific DNA binding|ethylene-activated signaling pathway|positive regulation of transcription, DNA-templated
LOC115708431	darkgreen	2.73276	2.76384	2.61776	2.73865	0.386939	2.23625	3.83915	1.74347			DnaJ protein homolog ANJ1	GeneID:115708431	GO:0016020,GO:0005524,GO:0031072,GO:0046872,GO:0051082,GO:0006457,GO:0009408	membrane|ATP binding|heat shock protein binding|metal ion binding|unfolded protein binding|protein folding|response to heat
LOC115708729	darkgreen	1.37241	1.92801	1.67225	2.00637	0	1.84367	2.34415	1.29692	TAD2	At1g48175	tRNA-specific adenosine deaminase TAD2	GeneID:115708729	GO:0005737,GO:0005634,GO:0008251,GO:0008270,GO:0006400	cytoplasm|nucleus|tRNA-specific adenosine deaminase activity|zinc ion binding|tRNA modification
LOC115708857	darkgreen	4.05389	3.9906	4.97484	4.33532	2.56655	5.13555	5.04494	4.15318	FLS		Flavonol synthase/flavanone 3-hydroxylase	GeneID:115708857	GO:0005737,GO:0031418,GO:0046872,GO:0045486,GO:0009813	cytoplasm|L-ascorbic acid binding|metal ion binding|naringenin 3-dioxygenase activity|flavonoid biosynthetic process	ko00941	Flavonoid biosynthesis
LOC115708863	darkgreen	1.13663	0.834823	1.8673	1.266	0.317743	1.98232	1.24504	1.25653	RLP6	At1g45616	Receptor-like protein 6	GeneID:115708863	GO:0016021,GO:0016020,GO:0005886	integral component of membrane|membrane|plasma membrane
LOC115709410	darkgreen	4.03348	3.86581	3.93263	3.91345	0.469062	4.0002	4.9987	3.17756				GeneID:115709410
LOC115709434	darkgreen	1.10594	1.84463	1.36987	1.12329	0.470228	1.99177	2.15878	1.47332		At1g43650	WAT1-related protein At1g43650	GeneID:115709434	GO:0016021,GO:0005886,GO:0022857	integral component of membrane|plasma membrane|transmembrane transporter activity
LOC115709472	darkgreen	4.96813	5.30187	4.62128	5.23348	0.197366	6.08719	6.02979	5.35481	RFS2	At3g57520	Probable galactinol--sucrose galactosyltransferase 2	GeneID:115709472	GO:0009506,GO:0052692,GO:0016757,GO:0034484,GO:0010325,GO:0080167,GO:0006979	plasmodesma|raffinose alpha-galactosidase activity|transferase activity, transferring glycosyl groups|raffinose catabolic process|raffinose family oligosaccharide biosynthetic process|response to karrikin|response to oxidative stress	ko00052	Galactose metabolism
LOC115709657	darkgreen	4.59114	4.39306	4.5864	4.45267	0.897845	5.42819	5.29279	4.67056	RPS2D	At3g57490	40S ribosomal protein S2-4	GeneID:115709657	GO:0022627,GO:0016020,GO:0009506,GO:0003723,GO:0003735,GO:0006412	cytosolic small ribosomal subunit|membrane|plasmodesma|RNA binding|structural constituent of ribosome|translation	ko03010	Ribosome
LOC115711040	darkgreen	3.67059	3.92267	3.63462	3.4209	0	2.54237	3.69531	4.37649				GeneID:115711040
LOC115711059	darkgreen	1.16274	1.35812	1.17144	1.76667	0.346369	2.14593	2.00794	1.19833				GeneID:115711059
LOC115711060	darkgreen	2.00717	2.12874	2.03766	1.6255	0.286682	2.9789	2.56474	1.90732	CPK8	At5g19450	Calcium-dependent protein kinase 8	GeneID:115711060	GO:0005886,GO:0005524,GO:0005509,GO:0004674	plasma membrane|ATP binding|calcium ion binding|protein serine/threonine kinase activity	ko04626	Plant-pathogen interaction
LOC115711079	darkgreen	1.41677	1.52682	1.372	1.34206	0.10165	2.32557	2.0643	1.54729	STL1	At2g41770	Probable glycosyltransferase STELLO1	GeneID:115711079	GO:0005768,GO:0005794,GO:0000139,GO:0016021,GO:0005802,GO:0042802,GO:0016757,GO:0052324,GO:2001009	endosome|Golgi apparatus|Golgi membrane|integral component of membrane|trans-Golgi network|identical protein binding|transferase activity, transferring glycosyl groups|plant-type cell wall cellulose biosynthetic process|regulation of plant-type cell wall cellulose biosynthetic process
LOC115711335	darkgreen	1.8069	1.75618	1.86014	1.7755	0.126598	2.66299	2.53986	1.85302	APCB1	At1g49050	Aspartyl protease APCB1	GeneID:115711335	GO:0016021,GO:0004190,GO:0050832,GO:0030163,GO:0006508	integral component of membrane|aspartic-type endopeptidase activity|defense response to fungus|protein catabolic process|proteolysis
LOC115711636	darkgreen	5.71694	5.55269	5.73311	5.47516	0.348727	6.38272	6.5396	5.67586	RPS13		40S ribosomal protein S13	GeneID:115711636	GO:0022627,GO:0005730,GO:0070181,GO:0003735,GO:0006412	cytosolic small ribosomal subunit|nucleolus|small ribosomal subunit rRNA binding|structural constituent of ribosome|translation	ko03010	Ribosome
LOC115711940	darkgreen	4.34223	4.06052	4.20087	4.12621	2.62387	3.85534	4.02102	3.53727		At4g37220	Cold-regulated 413 plasma membrane protein 4	GeneID:115711940	GO:0016021,GO:0005886,GO:0009750,GO:0009749,GO:0009744	integral component of membrane|plasma membrane|response to fructose|response to glucose|response to sucrose
LOC115712147	darkgreen	4.87805	3.81594	5.38142	4.5526	2.76574	4.53908	4.67054	4.27334	LRK10L-27	At1g66930	LEAF RUST 10 DISEASE-RESISTANCE LOCUS RECEPTOR-LIKE PROTEIN KINASE-like 2.7	GeneID:115712147
LOC115712191	darkgreen	2.65782	2.47009	2.73217	2.86246	0.0164734	2.0974	2.02096	1.46752	VRN1	At3g18990	B3 domain-containing transcription factor VRN1	GeneID:115712191	GO:0005654,GO:0003677,GO:0043565,GO:0009909,GO:0010048	nucleoplasm|DNA binding|sequence-specific DNA binding|regulation of flower development|vernalization response
LOC115712400	darkgreen	5.98103	5.47988	5.60403	5.61659	3.30484	5.25355	4.89623	5.06053	TKPR2	At1g68540	Tetraketide alpha-pyrone reductase 2	GeneID:115712400	GO:0005829,GO:0050662,GO:0016491,GO:0016616,GO:0010584,GO:0080110	cytosol|coenzyme binding|oxidoreductase activity|oxidoreductase activity, acting on the CH-OH group of donors, NAD or NADP as acceptor|pollen exine formation|sporopollenin biosynthetic process
LOC115712603	darkgreen	3.90592	4.32756	5.22829	4.85401	2.88527	5.10849	3.95551	4.53224	FAOMT		Flavonoid 3',5'-methyltransferase	GeneID:115712603	GO:0005737,GO:0046872,GO:0008171,GO:0009718,GO:0033485,GO:0033486,GO:0043473	cytoplasm|metal ion binding|O-methyltransferase activity|anthocyanin-containing compound biosynthetic process|cyanidin 3-O-glucoside biosynthetic process|delphinidin 3-O-glucoside biosynthetic process|pigmentation	ko00940,ko00941,ko00945	Phenylpropanoid biosynthesis|Flavonoid biosynthesis|Stilbenoid, diarylheptanoid and gingerol biosynthesis
LOC115712620	darkgreen	6.41759	5.90807	6.74893	6.43365	5.19699	6.75841	6.70426	6.10989	PCK1	At4g37870	Phosphoenolpyruvate carboxykinase (ATP) 1	GeneID:115712620	GO:0005829,GO:0016020,GO:0005730,GO:0005634,GO:0005524,GO:0004612,GO:0016036,GO:0009817,GO:0006094,GO:0046686	cytosol|membrane|nucleolus|nucleus|ATP binding|phosphoenolpyruvate carboxykinase (ATP) activity|cellular response to phosphate starvation|defense response to fungus, incompatible interaction|gluconeogenesis|response to cadmium ion	ko00010,ko00020,ko00620,ko00710	Glycolysis / Gluconeogenesis|Citrate cycle (TCA cycle)|Pyruvate metabolism|Carbon fixation in photosynthetic organisms
LOC115712639	darkgreen	6.40104	6.34442	6.82005	6.63681	0.991777	7.78831	8.95348	7.40038	THI2		Acidic protein	GeneID:115712639	GO:0090729,GO:0006952	toxin activity|defense response
LOC115712775	darkgreen	3.41055	4.00525	4.50002	4.20674	1.94579	4.81567	4.57053	3.26076	PER64	At5g42180	Peroxidase 64	GeneID:115712775	GO:0005576,GO:0009505,GO:0009506,GO:0020037,GO:0046872,GO:0004601,GO:0042744,GO:0006979	extracellular region|plant-type cell wall|plasmodesma|heme binding|metal ion binding|peroxidase activity|hydrogen peroxide catabolic process|response to oxidative stress	ko00940	Phenylpropanoid biosynthesis
LOC115712996	darkgreen	9.39416	9.18527	9.8534	9.28957	8.6184	9.78727	10.3807	9.43408				GeneID:115712996
LOC115713171	darkgreen	2.60366	1.668	3.10661	2.18183	0.239893	2.50817	2.66753	1.31303	PT1L		2-acylphloroglucinol 4-prenyltransferase	GeneID:115713171	GO:0031969,GO:0016021,GO:0016765	chloroplast membrane|integral component of membrane|transferase activity, transferring alkyl or aryl (other than methyl) groups	ko00130	Ubiquinone and other terpenoid-quinone biosynthesis
LOC115713205	darkgreen	2.84034	2.94478	4.47991	3.44833	1.8852	3.97452	2.82735	3.03107			2-acyl-4-prenylphloroglucinol 6-prenyltransferase, chloroplastic	GeneID:115713205	GO:0031969,GO:0016021,GO:0016765	chloroplast membrane|integral component of membrane|transferase activity, transferring alkyl or aryl (other than methyl) groups	ko00130	Ubiquinone and other terpenoid-quinone biosynthesis
LOC115713214	darkgreen	1.82616	2.23064	1.35913	1.03638	0.915596	1.92638	2.24702	1.76233		At4g15970	Uncharacterized protein At4g15970	GeneID:115713214
LOC115713254	darkgreen	4.28434	3.88173	5.03361	4.63433	3.16692	4.74568	4.13889	4.51873	CAN383		Chalcone synthase-like protein 1	GeneID:115713254	GO:0005737,GO:0016747,GO:0009058	cytoplasm|transferase activity, transferring acyl groups other than amino-acyl groups|biosynthetic process	ko00941,ko04712	Flavonoid biosynthesis|Circadian rhythm - plant
LOC115714134	darkgreen	7.38108	6.89427	6.74904	7.17654	5.92944	7.59779	7.67863	6.72756	GOLS1		Galactinol synthase 1	GeneID:115714134	GO:0005737,GO:0047216,GO:0046872,GO:0052576,GO:0070417,GO:0006012,GO:0010325	cytoplasm|inositol 3-alpha-galactosyltransferase activity|metal ion binding|carbohydrate storage|cellular response to cold|galactose metabolic process|raffinose family oligosaccharide biosynthetic process	ko00052	Galactose metabolism
LOC115714156	darkgreen	7.27103	6.9853	6.70118	7.32629	5.80062	6.9283	7.93601	5.87068				GeneID:115714156
LOC115714895	darkgreen	2.26663	1.93558	3.2554	3.12161	1.85553	3.497	2.75796	2.78574	SBT19	At5g67090	Subtilisin-like protease SBT1.9	GeneID:115714895	GO:0005576,GO:0004252,GO:0006508	extracellular region|serine-type endopeptidase activity|proteolysis
LOC115715301	darkgreen	2.00207	1.32022	2.57934	1.9033	0.322471	2.88067	2.03087	1.83262				GeneID:115715301
LOC115715604	darkgreen	4.19038	4.20797	4.16701	4.25223	2.22938	3.59463	4.88014	3.54832				GeneID:115715604
LOC115715663	darkgreen	3.05958	3.09033	2.91007	3.02018	1.08912	2.99606	3.36507	2.46433	NHL26	At5g53730	NDR1/HIN1-like protein 26	GeneID:115715663	GO:0046658,GO:0005789,GO:0016021,GO:0009506	anchored component of plasma membrane|endoplasmic reticulum membrane|integral component of membrane|plasmodesma
LOC115715766	darkgreen	5.08671	4.91923	5.36325	5.21004	3.65914	5.10561	4.92549	4.46885			Probable polygalacturonase	GeneID:115715766	GO:0016021,GO:0004650,GO:0005975	integral component of membrane|polygalacturonase activity|carbohydrate metabolic process
LOC115715798	darkgreen	2.85702	2.29755	2.02869	2.58615	0.915204	2.32842	3.05018	1.72549	ERF039	At4g16750	Ethylene-responsive transcription factor ERF039	GeneID:115715798	GO:0005634,GO:0003677,GO:0003700,GO:0009873	nucleus|DNA binding|DNA-binding transcription factor activity|ethylene-activated signaling pathway
LOC115715839	darkgreen	2.94417	3.29968	4.48151	4.13486	1.62003	3.08699	4.19212	2.51741				GeneID:115715839
LOC115715934	darkgreen	4.68786	4.68387	4.94069	4.55307	2.10329	4.67262	4.14297	3.7555	PKP2	At5g52920	Plastidial pyruvate kinase 2	GeneID:115715934	GO:0009507,GO:0009570,GO:0005737,GO:0005739,GO:0005524,GO:0016301,GO:0000287,GO:0030955,GO:0004743,GO:0032869,GO:0006633,GO:0006096,GO:0006629,GO:0046686,GO:0048316,GO:0010431	chloroplast|chloroplast stroma|cytoplasm|mitochondrion|ATP binding|kinase activity|magnesium ion binding|potassium ion binding|pyruvate kinase activity|cellular response to insulin stimulus|fatty acid biosynthetic process|glycolytic process|lipid metabolic process|response to cadmium ion|seed development|seed maturation	ko00010,ko00230,ko00620	Glycolysis / Gluconeogenesis|Purine metabolism|Pyruvate metabolism
LOC115716273	darkgreen	4.90124	4.81354	4.71184	4.89539	3.26513	4.71455	4.37611	4.15837		At5g10920	Argininosuccinate lyase, chloroplastic	GeneID:115716273	GO:0009507,GO:0009570,GO:0005737,GO:0005829,GO:0004056,GO:0042450	chloroplast|chloroplast stroma|cytoplasm|cytosol|argininosuccinate lyase activity|arginine biosynthetic process via ornithine	ko00220,ko00250	Arginine biosynthesis|Alanine, aspartate and glutamate metabolism
LOC115716421	darkgreen	4.33788	4.18902	4.2859	4.00081	2.49447	3.86379	4.03359	3.53733		At1g62620	Flavin-containing monooxygenase FMO GS-OX-like 3	GeneID:115716421	GO:0050660,GO:0004497,GO:0004499,GO:0050661	flavin adenine dinucleotide binding|monooxygenase activity|N,N-dimethylaniline monooxygenase activity|NADP binding
LOC115716446	darkgreen	4.51844	4.4414	4.07743	4.52257	3.14689	3.81388	4.80791	4.31255		At1g61500	G-type lectin S-receptor-like serine/threonine-protein kinase At1g61500	GeneID:115716446
LOC115716457	darkgreen	1.68492	2.26391	2.15594	1.85247	1.15271	3.31639	2.48223	1.9455	RALF		Rapid alkalinization factor	GeneID:115716457	GO:0005576,GO:0005179,GO:0048018,GO:0010469	extracellular region|hormone activity|receptor ligand activity|regulation of signaling receptor activity
LOC115716461	darkgreen	2.55577	2.67226	2.63213	2.68898	0.0778233	2.67578	2.04847	1.89268	PMIR1	At5g20610	Protein PLASTID MOVEMENT IMPAIRED 1-RELATED 1	GeneID:115716461	GO:0005737,GO:0030048,GO:0009903,GO:0009902,GO:0031022,GO:0009637	cytoplasm|actin filament-based movement|chloroplast avoidance movement|chloroplast relocation|nuclear migration along microfilament|response to blue light
LOC115716879	darkgreen	4.5948	4.60117	4.82754	4.56904	0.0892046	3.34902	4.00431	2.55277	ROC3	Os10g0575600	Homeobox-leucine zipper protein ROC3	GeneID:115716879	GO:0005634,GO:0008289,GO:0043565,GO:0006355	nucleus|lipid binding|sequence-specific DNA binding|regulation of transcription, DNA-templated
LOC115716920	darkgreen	1.26588	0.719797	1.4475	0.633148	0	1.17918	1.7082	0.992804	WRKY50	At5g26170	Probable WRKY transcription factor 50	GeneID:115716920	GO:0005634,GO:0003700,GO:0043565,GO:0050832,GO:0009867	nucleus|DNA-binding transcription factor activity|sequence-specific DNA binding|defense response to fungus|jasmonic acid mediated signaling pathway
LOC115717105	darkgreen	4.31866	3.38904	4.13635	3.54045	2.18524	4.29745	5.03972	3.69162	CYP78A9	At3g61880	Cytochrome P450 78A9	GeneID:115717105	GO:0016021,GO:0016020,GO:0020037,GO:0005506,GO:0016709,GO:0010154,GO:0040008,GO:0048316	integral component of membrane|membrane|heme binding|iron ion binding|oxidoreductase activity,acting on paired donors, with incorporation or reduction of molecular oxygen, NAD(P)H as one donor, and incorporation of one atom of oxygen|fruit development|regulation of growth|seed development
LOC115717156	darkgreen	3.86473	3.92842	3.77038	3.3516	2.28858	3.3601	3.95347	3.05231	QCT	At4g25720	Glutaminyl-peptide cyclotransferase	GeneID:115717156	GO:0005789,GO:0016021,GO:0005886,GO:0016603,GO:0017186	endoplasmic reticulum membrane|integral component of membrane|plasma membrane|glutaminyl-peptide cyclotransferase activity|peptidyl-pyroglutamic acid biosynthetic process, using glutaminyl-peptide cyclotransferase
LOC115717161	darkgreen	3.66414	3.46143	3.23946	3.02357	2.07617	3.14625	3.11614	2.53554				GeneID:115717161
LOC115717223	darkgreen	5.53101	5.3259	5.51468	5.49402	0.0935434	5.53285	5.60121	4.64333		At5g52840	Probable NADH dehydrogenase [ubiquinone] 1 alpha subcomplex subunit 5, mitochondrial	GeneID:115717223	GO:0009507,GO:0016020,GO:0031966,GO:0005747,GO:0005739,GO:0045271,GO:0009853,GO:0022904	chloroplast|membrane|mitochondrial membrane|mitochondrial respiratory chain complex I|mitochondrion|respiratory chain complex I|photorespiration|respiratory electron transport chain	ko00190	Oxidative phosphorylation
LOC115717230	darkgreen	2.45329	1.54148	2.23382	1.09896	1.10196	1.82215	2.21661	1.83189				GeneID:115717230
LOC115717308	darkgreen	4.26888	3.62417	4.17276	3.48941	0.123133	2.96507	4.28845	2.86289			Acidic endochitinase	GeneID:115717308	GO:0005615,GO:0004568,GO:0006032,GO:0000272	extracellular space|chitinase activity|chitin catabolic process|polysaccharide catabolic process	ko00520	Amino sugar and nucleotide sugar metabolism
LOC115717383	darkgreen	4.74629	4.37627	4.90571	4.60172	0	4.57887	4.64075	3.64231	SGT1	Os01g0624500	Protein SGT1 homolog	GeneID:115717383	GO:0005737,GO:0005634,GO:0006952,GO:0042742,GO:0050832,GO:0050821,GO:0031647	cytoplasm|nucleus|defense response|defense response to bacterium|defense response to fungus|protein stabilization|regulation of protein stability	ko04626	Plant-pathogen interaction
LOC115717401	darkgreen	2.18733	2.12997	2.30806	2.01396	0	1.91373	2.45463	1.52812				GeneID:115717401
LOC115717835	darkgreen	2.53942	2.42386	2.46792	2.47075	0	2.80065	2.13725	0.748133				GeneID:115717835
LOC115718118	darkgreen	2.03755	0.793047	1.76452	1.1838	0.785709	2.0169	1.69328	1.8834	ALMT9	At3g18440	Aluminum-activated malate transporter 9	GeneID:115718118	GO:0016021,GO:0009705,GO:0005253,GO:0015743	integral component of membrane|plant-type vacuole membrane|anion channel activity|malate transport
LOC115718159	darkgreen	5.46379	5.5525	5.49463	5.32739	2.17769	5.5097	5.64479	4.73156	RPS10-1	Os02g0549600	40S ribosomal protein S10-1	GeneID:115718159	GO:0022627,GO:0003735,GO:0000028	cytosolic small ribosomal subunit|structural constituent of ribosome|ribosomal small subunit assembly
LOC115718183	darkgreen	2.77893	3.29113	2.86326	2.4023	1.20049	3.16155	2.8052	3.06538	VAB	At3g63300	VAN3-binding protein	GeneID:115718183	GO:0009734,GO:0010305,GO:0010087,GO:0009733	auxin-activated signaling pathway|leaf vascular tissue pattern formation|phloem or xylem histogenesis|response to auxin
LOC115718569	darkgreen	2.82028	3.07449	3.56356	3.89124	2.07492	4.68883	4.36588	3.9371				GeneID:115718569
LOC115719041	darkgreen	2.32082	2.27197	2.93989	2.18973	1.63904	3.30908	3.20982	2.10825	RIC4	At5g16490	CRIB domain-containing protein RIC4	GeneID:115719041	GO:0016324,GO:0005886,GO:0010215,GO:0051650,GO:0007275,GO:0009860,GO:0030833,GO:0017157,GO:0040008	apical plasma membrane|plasma membrane|cellulose microfibril organization|establishment of vesicle localization|multicellular organism development|pollen tube growth|regulation of actin filament polymerization|regulation of exocytosis|regulation of growth
LOC115719217	darkgreen	3.2239	3.75236	3.16315	2.66882	1.77934	2.92327	3.42432	2.30379				GeneID:115719217
LOC115719756	darkgreen	5.65494	6.11485	6.74942	6.44623	4.89502	6.79333	6.25511	5.55482	LTL1	At3g04290	GDSL esterase/lipase LTL1	GeneID:115719756	GO:0005576,GO:0016788,GO:0042538,GO:0016042,GO:0010226,GO:0009751	extracellular region|hydrolase activity, acting on ester bonds|hyperosmotic salinity response|lipid catabolic process|response to lithium ion|response to salicylic acid
LOC115720979	darkgreen	0.814748	1.01318	1.7673	1.16941	0.398727	1.47253	2.03356	1.30244	FLA12	At5g60490	Fasciclin-like arabinogalactan protein 12	GeneID:115720979	GO:0031225,GO:0005886,GO:0009834	anchored component of membrane|plasma membrane|plant-type secondary cell wall biogenesis
LOC115721018	darkgreen	6.13979	5.69589	6.35121	6.31672	4.96729	5.76611	6.42231	5.167	CXE18	At5g23530	Probable carboxylesterase 18	GeneID:115721018	GO:0052689,GO:0009860	carboxylic ester hydrolase activity|pollen tube growth
LOC115721072	darkgreen	1.77424	1.71777	1.47758	1.79186	0.779844	2.27148	2.82552	1.47692			Secoisolariciresinol dehydrogenase	GeneID:115721072	GO:0102911,GO:0009807	(-)-secoisolariciresinol dehydrogenase activity|lignan biosynthetic process
LOC115721148	darkgreen	1.33398	1.66393	2.03928	1.3218	0.554263	2.27359	1.57542	1.25054	RSS3	Os11g0446000	Protein RICE SALT SENSITIVE 3	GeneID:115721148	GO:0005737,GO:0005634	cytoplasm|nucleus
LOC115721408	darkgreen	3.04913	2.58834	3.53849	3.37865	2.37162	3.541	4.16602	3.02271	ALDH3F1	At4g36250	Aldehyde dehydrogenase family 3 member F1	GeneID:115721408	GO:0005783,GO:0016020,GO:0004028,GO:0004029,GO:0043878,GO:0006081	endoplasmic reticulum|membrane|3-chloroallyl aldehyde dehydrogenase activity|aldehyde dehydrogenase (NAD) activity|glyceraldehyde-3-phosphate dehydrogenase (NAD+) (non-phosphorylating) activity|cellular aldehyde metabolic process	ko00010,ko00053,ko00071,ko00280,ko00310,ko00330,ko00340,ko00380,ko00410,ko00561,ko00620,ko00903	Glycolysis / Gluconeogenesis|Ascorbate and aldarate metabolism|Fatty acid degradation|Valine, leucine and isoleucine degradation|Lysine degradation|Arginine and proline metabolism|Histidine metabolism|Tryptophan metabolism|beta-Alanine metabolism|Glycerolipid metabolism|Pyruvate metabolism|Limonene and pinene degradation
LOC115721843	darkgreen	1.87297	2.80925	3.7417	3.26752	2.44271	3.50931	2.90896	3.4229	AGP13	At4g26320	Arabinogalactan protein 13	GeneID:115721843	GO:0031225,GO:0005886	anchored component of membrane|plasma membrane
LOC115722492	darkgreen	2.04784	1.44035	3.01256	1.97757	1.53461	2.74903	2.51199	2.40918	HIDM		2-hydroxyisoflavanone dehydratase	GeneID:115722492	GO:0033987,GO:0052689,GO:0009813,GO:0009717,GO:0046287	2-hydroxyisoflavanone dehydratase activity|carboxylic ester hydrolase activity|flavonoid biosynthetic process|isoflavonoid biosynthetic process|isoflavonoid metabolic process
LOC115722647	darkgreen	2.12467	2.37194	1.94549	2.06745	0.373781	2.01723	2.13349	0.868288				GeneID:115722647
LOC115722991	darkgreen	1.06873	1.15304	1.80047	1.41847	0	1.11288	1.70968	0.953393			2-acylphloroglucinol 4-prenyltransferase, chloroplastic	GeneID:115722991	GO:0031969,GO:0016021,GO:0016765	chloroplast membrane|integral component of membrane|transferase activity, transferring alkyl or aryl (other than methyl) groups	ko00130	Ubiquinone and other terpenoid-quinone biosynthesis
LOC115723125	darkgreen	1.59007	1.65884	1.7437	1.57728	0.395812	2.25208	2.18865	2.28868	AOS1	Solyc04g079730	Allene oxide synthase 1, chloroplastic	GeneID:115723125	GO:0009941,GO:0009535,GO:0020037,GO:0047987,GO:0005506,GO:0004497,GO:0016705,GO:0006952,GO:0009695,GO:0055114,GO:0031408,GO:0016125	chloroplast envelope|chloroplast thylakoid membrane|heme binding|hydroperoxide dehydratase activity|iron ion binding|monooxygenase activity|oxidoreductase activity, acting on paired donors, with incorporation or reduction of molecular oxygen|defense response|jasmonic acid biosynthetic process|oxidation-reduction process|oxylipin biosynthetic process|sterol metabolic process	ko00592	alpha-Linolenic acid metabolism
LOC115723302	darkgreen	3.39782	3.66959	4.35593	4.20571	2.93198	4.56775	4.48487	4.26754	COMT1		Caffeic acid 3-O-methyltransferase	GeneID:115723302	GO:0047763,GO:0046983,GO:0009809	caffeate O-methyltransferase activity|protein dimerization activity|lignin biosynthetic process	ko00940	Phenylpropanoid biosynthesis
LOC115723667	darkgreen	0.932661	1.54501	1.54833	1.48401	0.0112327	1.10263	2.33672	0.758251	pif1		ATP-dependent DNA helicase PIF1	GeneID:115723667	GO:0005739,GO:0005634,GO:0005657,GO:0005524,GO:0043141,GO:0003677,GO:0032508,GO:0006310,GO:0006281,GO:0006260,GO:0000002,GO:0000723	mitochondrion|nucleus|replication fork|ATP binding|ATP-dependent 5'-3' DNA helicase activity|DNA binding|DNA duplex unwinding|DNA recombination|DNA repair|DNA replication|mitochondrial genome maintenance|telomere maintenance
LOC115724061	darkgreen	5.79853	5.71784	6.19662	6.22997	4.19147	5.06512	6.99439	6.01768			Glutathione S-transferase	GeneID:115724061	GO:0004364,GO:0009734	glutathione transferase activity|auxin-activated signaling pathway	ko00480	Glutathione metabolism
LOC115724459	darkgreen	5.38696	5.38902	5.9156	5.67735	4.20661	5.91616	5.79827	5.79736	SBT54	At5g59810	Subtilisin-like protease SBT5.4	GeneID:115724459	GO:0005783,GO:0005886,GO:0004252,GO:0010074,GO:0040008	endoplasmic reticulum|plasma membrane|serine-type endopeptidase activity|maintenance of meristem identity|regulation of growth
LOC115724709	darkgreen	1.59821	1.65436	2.5961	1.84769	0.4915	1.99044	2.03555	0.431473	SAUR22	At5g18050	Auxin-responsive protein SAUR22	GeneID:115724709	GO:0005886,GO:0009734,GO:0007275,GO:0040008	plasma membrane|auxin-activated signaling pathway|multicellular organism development|regulation of growth	ko04075	Plant hormone signal transduction
LOC115724980	darkgreen	3.72345	3.44312	4.83567	4.03939	3.34402	4.64276	3.90322	4.44899	CYP71D11		Cytochrome P450 71D11	GeneID:115724980	GO:0020037,GO:0005506,GO:0004497,GO:0016705	heme binding|iron ion binding|monooxygenase activity|oxidoreductase activity, acting on paired donors, with incorporation or reduction of molecular oxygen
LOC115725180	darkgreen	2.61258	3.09167	2.70187	2.48391	1.67373	3.12103	3.43936	2.41208	ETN8	At1g02630	Equilibrative nucleotide transporter 8	GeneID:115725180	GO:0016021,GO:0005886,GO:0005337	integral component of membrane|plasma membrane|nucleoside transmembrane transporter activity
LOC115725224	darkgreen	3.06258	2.53367	3.52886	3.45064	2.10167	3.64464	3.26747	2.468	SAUR50	At4g34760	Auxin-responsive protein SAUR50	GeneID:115725224	GO:0009734,GO:0040008	auxin-activated signaling pathway|regulation of growth
LOC115725501	darkgreen	3.66703	3.49687	3.48202	3.23722	1.35031	3.13057	2.86064	2.72396				GeneID:115725501

## Sheet: darkgrey_54
Supplementary Table S6: Genes of module (XLS).
darkgrey module
Gene id	Modules	Cs4XF1	Cs4XF2	Cs4XF3	Cs4XF4	Cs2XF1	Cs2XF2	Cs2XF3	Cs2XF4	gene_symbol	gene_homologs	description	gene_Dbxref	GO_id	GO_term	pathway	pathway_description
LOC115695347	darkgrey	1.34421	2.13052	1.03179	1.8063	2.43747	2.0985	1.02773	2.45435				GeneID:115695347
LOC115695647	darkgrey	6.18193	4.94515	5.04611	6.19782	6.46057	5.57549	5.38839	6.20132				GeneID:115695647
LOC115697682	darkgrey	4.89349	4.86239	4.67114	4.824	5.82748	5.7719	4.84657	5.76316	PIA1	At5g07840	Protein ANK6-like, mitochondrial	GeneID:115697682	GO:0005737,GO:0005739,GO:0005634,GO:0010313	cytoplasm|mitochondrion|nucleus|phytochrome binding
LOC115697828	darkgrey	6.27925	6.38637	6.1479	7.22966	7.90918	7.06268	5.72131	7.12809			Non-specific lipid-transfer protein	GeneID:115697828	GO:0008289,GO:0006869	lipid binding|lipid transport
LOC115699199	darkgrey	8.43975	7.86472	8.33146	8.77168	9.37982	9.12315	8.05722	8.69752			Chlorophyll a-b binding protein, chloroplastic	GeneID:115699199	GO:0009535,GO:0016021,GO:0009522,GO:0009523,GO:0016168,GO:0046872,GO:0009765,GO:0018298	chloroplast thylakoid membrane|integral component of membrane|photosystem I|photosystem II|chlorophyll binding|metal ion binding|photosynthesis, light harvesting|protein-chromophore linkage	ko00196	Photosynthesis - antenna proteins
LOC115699770	darkgrey	5.63199	5.01027	5.09954	5.41709	6.45944	6.25831	5.31112	5.97077			Endo-1,3	GeneID:115699770	GO:0005576,GO:0016787	extracellular region|hydrolase activity
LOC115700368	darkgrey	3.12415	2.87805	2.50708	2.53926	3.7392	3.68374	2.60896	3.79242	EMB2758	At4g33990	Pentatricopeptide repeat-containing protein At4g33990	GeneID:115700368
LOC115702584	darkgrey	0.244712	0.343964	0.143474	0.33719	1.57648	0.802544	0.381597	1.33398				GeneID:115702584
LOC115704430	darkgrey	0.0857112	0	0.313086	0	1.95262	1.5881	0.415972	0.345521	5MMP	At1g59970	Metalloendoproteinase 5-MMP	GeneID:115704430	GO:0031225,GO:0031012,GO:0005886,GO:0004222,GO:0008270	anchored component of membrane|extracellular matrix|plasma membrane|metalloendopeptidase activity|zinc ion binding
LOC115704641	darkgrey	0	0.066776	0.071206	0	5.0917	4.99852	0	4.92989				GeneID:115704641
LOC115704957	darkgrey	2.53356	2.248	1.99838	2.59182	3.36331	2.95895	1.75343	2.76904	ATPD		ATP synthase delta chain, chloroplastic	GeneID:115704957	GO:0009535,GO:0045261,GO:0046933,GO:0015986	chloroplast thylakoid membrane|proton-transporting ATP synthase complex, catalytic core F(1)|proton-transporting ATP synthase activity, rotational mechanism|ATP synthesis coupled proton transport	ko00190,ko00195	Oxidative phosphorylation|Photosynthesis
LOC115705356	darkgrey	2.58145	0.681247	1.55271	1.55515	2.61008	2.45369	1.09803	2.57155	BCB	At5g20230	Blue copper protein	GeneID:115705356	GO:0031225,GO:0046658,GO:0005886,GO:0005773,GO:0009055,GO:0046872,GO:0015690,GO:0070417,GO:1901141,GO:0009646,GO:0002239,GO:0006979	anchored component of membrane|anchored component of plasma membrane|plasma membrane|vacuole|electron transfer activity|metal ion binding|aluminum cation transport|cellular response to cold|regulation of lignin biosynthetic process|response to absence of light|response to oomycetes|response to oxidative stress
LOC115705702	darkgrey	1.8288	1.2587	1.94251	2.67764	2.79242	2.91433	2.25048	2.95659	TED7		Protein TRACHEARY ELEMENT DIFFERENTIATION-RELATED 7A	GeneID:115705702
LOC115706107	darkgrey	0.423227	0.111365	0.330122	0.147837	5.36498	3.36792	0.319829	4.02968	ERF106	At5g07580	Ethylene-responsive transcription factor ERF106	GeneID:115706107	GO:0005634,GO:0003677,GO:0003700,GO:0009873	nucleus|DNA binding|DNA-binding transcription factor activity|ethylene-activated signaling pathway
LOC115706279	darkgrey	1.3197	3.12312	1.77652	1.66827	3.14005	3.15948	2.0113	3.93454		At4g13360	3-hydroxyisobutyryl-CoA hydrolase-like protein 3, mitochondrial	GeneID:115706279	GO:0005829,GO:0005739,GO:0003860,GO:0006635	cytosol|mitochondrion|3-hydroxyisobutyryl-CoA hydrolase activity|fatty acid beta-oxidation	ko00280,ko00410,ko00640	Valine, leucine and isoleucine degradation|beta-Alanine metabolism|Propanoate metabolism
LOC115706301	darkgrey	0.128522	0.259892	0.0884716	0.0986593	4.27292	2.81205	0.0575496	3.58309	LPL1	YOR059C	Lipid droplet phospholipase 1	GeneID:115706301
LOC115706576	darkgrey	0.701653	0.716928	0.632227	0.673343	3.04262	1.90795	0.614324	2.81816	PUB52	At5g61550	Serine/threonine-protein kinase	GeneID:115706576
LOC115706578	darkgrey	1.26866	1.25837	1.63041	1.90756	2.88644	2.98244	1.51109	2.67422	MAN6	At5g01930	Mannan endo-1,4-beta-mannosidase 6	GeneID:115706578	GO:0005576,GO:0016985,GO:0046355,GO:0009845	extracellular region|mannan endo-1,4-beta-mannosidase activity|mannan catabolic process|seed germination	ko00051	Fructose and mannose metabolism
LOC115706581	darkgrey	0.841489	0.975204	0.804507	0.751536	1.91025	2.13131	0.793856	1.95025	TMKL1	At3g24660	Putative kinase-like protein TMKL1	GeneID:115706581	GO:0016021,GO:0005886,GO:0009506,GO:0005524,GO:0004672	integral component of membrane|plasma membrane|plasmodesma|ATP binding|protein kinase activity
LOC115706584	darkgrey	0.0293752	0.0310973	0.0331875	0.0279073	3.44396	2.87593	0	3.05581	CBP3	YPL215W	Protein CBP3, mitochondrial	GeneID:115706584	GO:0061671,GO:0032592,GO:0005761,GO:0005739,GO:0043022,GO:0034551,GO:0070131	Cbp3p-Cbp6 complex|integral component of mitochondrial membrane|mitochondrial ribosome|mitochondrion|ribosome binding|mitochondrial respiratory chain complex III assembly|positive regulation of mitochondrial translation
LOC115706585	darkgrey	0	0	0.18661	0.0276031	2.86458	2.75622	0.122816	2.45862	APS1		Acid phosphatase 1	GeneID:115706585	GO:0003993	acid phosphatase activity
LOC115707406	darkgrey	0.117554	0.781901	0.577439	0.177589	1.91366	1.59164	0.526397	1.66378		At3g06530	Uncharacterized protein At3g06530	GeneID:115707406	GO:0030686,GO:0032040,GO:0034455,GO:0030515,GO:0000462,GO:0045943	90S preribosome|small-subunit processome|t-UTP complex|snoRNA binding|maturation of SSU-rRNA from tricistronic rRNA transcript (SSU-rRNA, 5.8S rRNA, LSU-rRNA)|positive regulation of transcription by RNA polymerase I	ko03008	Ribosome biogenesis in eukaryotes
LOC115707561	darkgrey	0.254465	0.385691	0.381314	0.316843	3.07415	2.4469	0.252759	2.7876		At3g06530	Uncharacterized protein At3g06530	GeneID:115707561	GO:0030686,GO:0032040,GO:0034455,GO:0030515,GO:0000462,GO:0045943	90S preribosome|small-subunit processome|t-UTP complex|snoRNA binding|maturation of SSU-rRNA from tricistronic rRNA transcript (SSU-rRNA, 5.8S rRNA, LSU-rRNA)|positive regulation of transcription by RNA polymerase I	ko03008	Ribosome biogenesis in eukaryotes
LOC115707628	darkgrey	2.24412	0.71455	1.6847	1.17029	3.8062	3.58655	1.45894	2.19122	Cht4	Os04g0493400	Chitinase 4	GeneID:115707628	GO:0008061,GO:0004568,GO:0016998,GO:0006032,GO:0006952,GO:0000272	chitin binding|chitinase activity|cell wall macromolecule catabolic process|chitin catabolic process|defense response|polysaccharide catabolic process	ko00520	Amino sugar and nucleotide sugar metabolism
LOC115708267	darkgrey	4.73817	4.67474	4.30708	4.62623	6.01217	5.75786	4.53267	5.47634	DBR		2-alkenal reductase (NADP(+)-dependent)	GeneID:115708267	GO:0016491	oxidoreductase activity
LOC115708339	darkgrey	1.99916	2.51433	2.26757	1.49748	4.484	4.02681	2.77202	3.59572	SRP14	At2g43640	Signal recognition particle 14 kDa protein	GeneID:115708339	GO:0005786,GO:0008312,GO:0030942,GO:0045047,GO:0006614	signal recognition particle, endoplasmic reticulum targeting|7S RNA binding|endoplasmic reticulum signal peptide binding|protein targeting to ER|SRP-dependent cotranslational protein targeting to membrane	ko03060	Protein export
LOC115709008	darkgrey	2.59743	1.82543	2.20682	3.22767	3.81302	3.10144	2.39247	3.48795	RID3	At3g49180	Protein ROOT INITIATION DEFECTIVE 3	GeneID:115709008	GO:0080008,GO:0005656,GO:0097344,GO:1902184,GO:0006267,GO:0030174,GO:0000027,GO:0006364	Cul4-RING E3 ubiquitin ligase complex|nuclear pre-replicative complex|Rix1 complex|negative regulation of shoot apical meristem development|pre-replicative complex assembly involved in nuclear cell cycle DNA replication|regulation of DNA-dependent DNA replication initiation|ribosomal large subunit assembly|rRNA processing
LOC115709868	darkgrey	1.49499	1.43954	1.65946	1.17494	2.93097	3.32748	1.40197	2.9664	SAE1B-1	At5g50580	SUMO-activating enzyme subunit 1B-1	GeneID:115709868	GO:0005737,GO:0005634,GO:0019948,GO:0016925	cytoplasm|nucleus|SUMO activating enzyme activity|protein sumoylation	ko04120	Ubiquitin mediated proteolysis
LOC115712493	darkgrey	5.33067	2.9064	3.09558	5.1678	6.18684	5.48995	4.9212	5.45229	XERICO	At2g04240	Probable E3 ubiquitin-protein ligase XERICO	GeneID:115712493	GO:0016021,GO:0046872,GO:0016740,GO:0009688,GO:0009687,GO:0016567,GO:0010200,GO:0009739,GO:0006970,GO:0009651	integral component of membrane|metal ion binding|transferase activity|abscisic acid biosynthetic process|abscisic acid metabolic process|protein ubiquitination|response to chitin|response to gibberellin|response to osmotic stress|response to salt stress
LOC115714064	darkgrey	5.10306	4.19081	4.58057	5.13144	5.56265	5.32439	4.71743	5.65605	GT7	At2g22900	Putative glycosyltransferase 7	GeneID:115714064	GO:0005768,GO:0005794,GO:0000139,GO:0016021,GO:0005802,GO:0008378,GO:0010392,GO:0051070,GO:0010192,GO:0010214	endosome|Golgi apparatus|Golgi membrane|integral component of membrane|trans-Golgi network|galactosyltransferase activity|galactoglucomannan metabolic process|galactomannan biosynthetic process|mucilage biosynthetic process|seed coat development
LOC115715178	darkgrey	0.433231	1.03646	0.481542	0.529513	1.82273	1.52608	0.870794	1.50345	ARR24	At5g26594	Two-component response regulator 24	GeneID:115715178	GO:0005634,GO:0009736,GO:0000160	nucleus|cytokinin-activated signaling pathway|phosphorelay signal transduction system
LOC115715917	darkgrey	1.95252	1.46226	1.57298	1.92978	2.33975	2.86729	1.19696	1.90028				GeneID:115715917
LOC115716316	darkgrey	3.3399	2.87312	3.40192	3.18993	4.8834	4.65737	3.25275	4.2249	CSN7	At1g02090	COP9 signalosome complex subunit 7	GeneID:115716316	GO:0008180,GO:0005829,GO:0010387,GO:0007275,GO:0000338,GO:0009585	COP9 signalosome|cytosol|COP9 signalosome assembly|multicellular organism development|protein deneddylation|red, far-red light phototransduction
LOC115716444	darkgrey	3.41157	3.17074	3.48739	3.47306	4.54294	4.69101	3.44097	4.31388			Thioredoxin H-type	GeneID:115716444	GO:0005737,GO:0015035,GO:0045454,GO:0006662	cytoplasm|protein disulfide oxidoreductase activity|cell redox homeostasis|glycerol ether metabolic process
LOC115716611	darkgrey	3.20913	3.14052	3.04566	3.03091	3.62778	3.64001	2.4496	4.21575	XLT2	At5g62220	Xyloglucan galactosyltransferase XLT2	GeneID:115716611	GO:0005794,GO:0000139,GO:0016021,GO:0008378,GO:0006486,GO:0009969	Golgi apparatus|Golgi membrane|integral component of membrane|galactosyltransferase activity|protein glycosylation|xyloglucan biosynthetic process
LOC115717108	darkgrey	3.23274	3.24936	3.49764	3.23113	4.14003	4.42447	3.15162	4.0784	NRG2	At3g60320	Nitrate regulatory gene2 protein	GeneID:115717108	GO:0005634,GO:0071249,GO:0015706,GO:0071705,GO:0010167,GO:1901698	nucleus|cellular response to nitrate|nitrate transport|nitrogen compound transport|response to nitrate|response to nitrogen compound
LOC115718016	darkgrey	1.85284	1.08952	1.48323	1.11359	3.91986	3.59889	0	3.367	RPS1		30S ribosomal protein S1, chloroplastic	GeneID:115718016	GO:0009507,GO:0005840,GO:0003723	chloroplast|ribosome|RNA binding	ko03015	mRNA surveillance pathway
LOC115718399	darkgrey	0.629332	0.441244	0.694781	0.879686	3.07603	3.06718	0.643404	2.54087	UGT71K2		UDP-glycosyltransferase 71K2	GeneID:115718399	GO:0035251	UDP-glucosyltransferase activity
LOC115718474	darkgrey	2.45522	2.15037	2.66334	2.61216	3.74844	3.1704	2.55291	3.44613				GeneID:115718474
LOC115718674	darkgrey	0.256136	0.57183	0.814953	0.619789	1.42053	1.77289	0.658615	1.53171	WIP2	At3g57670	Zinc finger protein WIP2	GeneID:115718674	GO:0005634,GO:0003700,GO:0046872,GO:0003676,GO:0001709,GO:1990058,GO:0009860,GO:0010468,GO:0006355,GO:0010500	nucleus|DNA-binding transcription factor activity|metal ion binding|nucleic acid binding|cell fate determination|fruit replum development|pollen tube growth|regulation of gene expression|regulation of transcription, DNA-templated|transmitting tissue development
LOC115718906	darkgrey	2.00598	2.21637	2.38003	2.34882	4.34536	4.53294	2.55854	4.45647		At1g54730	Sugar transporter ERD6-like 5	GeneID:115718906	GO:0005887,GO:0005351,GO:0005355,GO:0008645	integral component of plasma membrane|carbohydrate:proton symporter activity|glucose transmembrane transporter activity|hexose transmembrane transport
LOC115718943	darkgrey	0.434439	0.490621	0.395802	0.711823	1.66149	1.45182	0.503404	1.76822	PCMP-E1	At5g59600	Pentatricopeptide repeat-containing protein At5g59600	GeneID:115718943
LOC115718960	darkgrey	2.07413	1.17842	1.76002	2.00975	3.11449	2.56877	1.71326	2.84274	SWEET16	Os03g0341300	Bidirectional sugar transporter SWEET16	GeneID:115718960	GO:0005887,GO:0051119	integral component of plasma membrane|sugar transmembrane transporter activity
LOC115719228	darkgrey	0.046285	0.0728627	0	0	6.52148	5.66726	0.0504677	5.88709	UGT71K1		UDP-glycosyltransferase 71K1	GeneID:115719228	GO:0035251	UDP-glucosyltransferase activity
LOC115719275	darkgrey	3.09084	1.67355	2.79472	3.54144	4.55827	4.20101	2.74163	3.73621	ZIP1	Os01g0972200	Zinc transporter 1	GeneID:115719275	GO:0016021,GO:0005886,GO:0005385,GO:0071577,GO:0006829	integral component of membrane|plasma membrane|zinc ion transmembrane transporter activity|zinc ion transmembrane transport|zinc ion transport
LOC115719431	darkgrey	5.98921	5.9833	5.0475	5.86771	6.94249	6.27988	5.54228	6.75118	MYB48	At3g46130	Transcription factor MYB48	GeneID:115719431	GO:0005634,GO:0003700,GO:0043565,GO:0006355,GO:0009751	nucleus|DNA-binding transcription factor activity|sequence-specific DNA binding|regulation of transcription, DNA-templated|response to salicylic acid
LOC115719703	darkgrey	2.14339	2.11164	2.18207	2.04965	3.66789	3.44589	2.07694	3.5416	HSFB1	At4g36990	Heat stress transcription factor B-1	GeneID:115719703	GO:0005634,GO:0003700,GO:0000978,GO:0043565,GO:0034605,GO:0045892,GO:0061408,GO:0009408	nucleus|DNA-binding transcription factor activity|RNA polymerase II proximal promoter sequence-specific DNA binding|sequence-specific DNA binding|cellular response to heat|negative regulation of transcription, DNA-templated|positive regulation of transcription from RNA polymerase II promoter in response to heat stress|response to heat
LOC115720985	darkgrey	0	0	0	0	3.44297	3.08226	0	2.98858				GeneID:115720985
LOC115721086	darkgrey	0	0	0.0288686	0	5.18819	2.14789	0	4.24593				GeneID:115721086
LOC115721195	darkgrey	0	0	0	0	2.01179	1.73245	0	2.13264				GeneID:115721195
LOC115722571	darkgrey	5.08219	5.48435	4.95465	4.85917	5.97543	5.66826	4.38962	6.07698	CCX2	At5g17850	Cation/calcium exchanger 2	GeneID:115722571	GO:0005783,GO:0016021,GO:0015297,GO:0006813,GO:0006970,GO:0006814	endoplasmic reticulum|integral component of membrane|antiporter activity|potassium ion transport|response to osmotic stress|sodium ion transport
LOC115723190	darkgrey	0.204136	1.20853	1.00514	0.342596	1.54229	1.99892	0.605619	1.36658	PER40	At4g16270	Peroxidase 40	GeneID:115723190	GO:0005576,GO:0020037,GO:0046872,GO:0004601,GO:0042744,GO:0006979	extracellular region|heme binding|metal ion binding|peroxidase activity|hydrogen peroxide catabolic process|response to oxidative stress	ko00940	Phenylpropanoid biosynthesis
LOC115724012	darkgrey	0.414757	0.121948	0.730662	0.707116	1.33572	1.4457	0	1.82211	IDH5	At5g03290	Isocitrate dehydrogenase [NAD] catalytic subunit 5, mitochondrial	GeneID:115724012	GO:0009507,GO:0005739,GO:0005524,GO:0004449,GO:0000287,GO:0051287,GO:0008270,GO:0006102,GO:0006099	chloroplast|mitochondrion|ATP binding|isocitrate dehydrogenase (NAD+) activity|magnesium ion binding|NAD binding|zinc ion binding|isocitrate metabolic process|tricarboxylic acid cycle	ko00020	Citrate cycle (TCA cycle)
LOC115725169	darkgrey	1.16645	0.537368	0.91679	0.872195	3.24262	2.57656	0.575063	4.29235	RLP35	At3g11080	Receptor-like protein 35	GeneID:115725169	GO:0016021,GO:0005886	integral component of membrane|plasma membrane

## Sheet: darkorange_48
Supplementary Table S6: Genes of module (XLS).
darkorange module
Gene id	Modules	Cs4XF1	Cs4XF2	Cs4XF3	Cs4XF4	Cs2XF1	Cs2XF2	Cs2XF3	Cs2XF4	gene_symbol	gene_homologs	description	gene_Dbxref	GO_id	GO_term	pathway	pathway_description
LOC115695872	darkorange	2.40638	0.412598	1.18882	0.359134	1.19783	1.41173	1.51237	1.27403	GT3		Putative UDP-glucose flavonoid 3-O-glucosyltransferase 3	GeneID:115695872	GO:0016758	transferase activity, transferring hexosyl groups
LOC115696215	darkorange	4.59906	3.02035	3.04031	2.07784	2.29512	2.53374	0.862068	2.48483	EP3	At3g54420	Endochitinase EP3	GeneID:115696215	GO:0005618,GO:0008061,GO:0004568,GO:0016998,GO:0006032,GO:0006952,GO:0000272,GO:0009617,GO:0009611,GO:0010262	cell wall|chitin binding|chitinase activity|cell wall macromolecule catabolic process|chitin catabolic process|defense response|polysaccharide catabolic process|response to bacterium|response to wounding|somatic embryogenesis	ko00520	Amino sugar and nucleotide sugar metabolism
LOC115696504	darkorange	2.07852	0.680421	0.630625	0.0285792	0.78498	0.522286	1.07339	1.45355				GeneID:115696504
LOC115696650	darkorange	3.13616	2.51758	2.24567	0.620431	1.36093	1.47374	1.58322	2.19247	pod		Peroxidase 15	GeneID:115696650	GO:0005576,GO:0020037,GO:0046872,GO:0004601,GO:0042744,GO:0006979	extracellular region|heme binding|metal ion binding|peroxidase activity|hydrogen peroxide catabolic process|response to oxidative stress	ko00940	Phenylpropanoid biosynthesis
LOC115696852	darkorange	3.13521	2.89345	2.12364	1.21237	2.16372	2.01315	1.9016	2.48576		At5g44400	Berberine bridge enzyme-like 26	GeneID:115696852	GO:0005618,GO:0005576,GO:0009506,GO:0071949,GO:0016491	cell wall|extracellular region|plasmodesma|FAD binding|oxidoreductase activity	ko00940	Phenylpropanoid biosynthesis
LOC115697140	darkorange	3.05532	2.19188	2.76301	1.91562	1.54242	2.08538	2.45859	3.05856	VQ22	At3g22160	VQ motif-containing protein 22	GeneID:115697140	GO:0005634	nucleus
LOC115698068	darkorange	1.71103	0.897482	0.724836	0.537223	1.11417	0.515416	0	1.07061	HSP26-A		Probable glutathione S-transferase	GeneID:115698068	GO:0005737,GO:0004364,GO:0006749,GO:0009737,GO:0009733,GO:0009735,GO:0009739,GO:0009408,GO:0010038	cytoplasm|glutathione transferase activity|glutathione metabolic process|response to abscisic acid|response to auxin|response to cytokinin|response to gibberellin|response to heat|response to metal ion	ko00480	Glutathione metabolism
LOC115698289	darkorange	4.78151	2.68013	3.2511	2.34285	2.62518	3.69844	2.8681	3.81957	Cht5	Os04g0494100	Chitinase 5	GeneID:115698289	GO:0008061,GO:0004568,GO:0016998,GO:0006032,GO:0006952,GO:0000272	chitin binding|chitinase activity|cell wall macromolecule catabolic process|chitin catabolic process|defense response|polysaccharide catabolic process	ko00520	Amino sugar and nucleotide sugar metabolism
LOC115698743	darkorange	4.75837	4.38426	3.89433	3.08584	3.1597	3.00916	3.7775	4.35695			Secoisolariciresinol dehydrogenase	GeneID:115698743	GO:0102911,GO:0009807	(-)-secoisolariciresinol dehydrogenase activity|lignan biosynthetic process
LOC115698987	darkorange	3.18288	2.42948	1.67798	0.253185	0.735016	0.57898	0.847757	1.34382			Secoisolariciresinol dehydrogenase	GeneID:115698987	GO:0102911,GO:0009807	(-)-secoisolariciresinol dehydrogenase activity|lignan biosynthetic process
LOC115699230	darkorange	3.03099	2.38206	2.12563	1.60742	2.00676	1.31981	2.15379	2.43789	DIR21	At1g65870	Dirigent protein 21	GeneID:115699230	GO:0005618,GO:0005576	cell wall|extracellular region
LOC115701185	darkorange	1.43584	0	0.146892	0.163436	0.0511994	0.101179	0.727028	1.03907				GeneID:115701185
LOC115701280	darkorange	4.36606	3.56156	3.33177	2.6499	3.93708	2.93408	3.17586	3.70549	PMAT1	At5g39050	Phenolic glucoside malonyltransferase 1	GeneID:115701280	GO:0005829,GO:0050736,GO:0009636	cytosol|O-malonyltransferase activity|response to toxic substance
LOC115702616	darkorange	4.89299	3.26986	3.67683	3.49957	2.55498	3.73568	3.81253	4.01914	DIR19	At1g58170	Dirigent protein 19	GeneID:115702616	GO:0048046	apoplast
LOC115702714	darkorange	1.77487	0.38917	0.161055	0.136364	0.13164	0.63447	1.0023	0.654771		At3g50210	Probable 2-oxoglutarate-dependent dioxygenase At3g50210	GeneID:115702714	GO:0051213,GO:0046872	dioxygenase activity|metal ion binding
LOC115702721	darkorange	3.06198	1.5372	1.1499	0.268593	0	1.01367	0.304889	0.974165		At3g50210	Probable 2-oxoglutarate-dependent dioxygenase At3g50210	GeneID:115702721	GO:0051213,GO:0046872	dioxygenase activity|metal ion binding
LOC115703892	darkorange	1.57841	0	1.67866	0.20661	0	0	0	0	LIMYB	At5g05800	L10-interacting MYB domain-containing protein	GeneID:115703892	GO:0005634	nucleus
LOC115704466	darkorange	6.16608	5.70097	4.78622	2.19644	3.12421	3.66233	4.35664	4.90391	PRB1	At2g14580	Pathogenesis-related protein 1	GeneID:115704466	GO:0005615,GO:0009814,GO:0009617,GO:0009723,GO:0080027,GO:0009753,GO:0009751,GO:0009611	extracellular space|defense response, incompatible interaction|response to bacterium|response to ethylene|response to herbivore|response to jasmonic acid|response to salicylic acid|response to wounding	ko04016,ko04075,ko04626	MAPK signaling pathway - plant|Plant hormone signal transduction|Plant-pathogen interaction
LOC115704652	darkorange	4.8931	3.63246	3.75672	3.17735	3.12185	4.17255	3.24868	4.08969	EP3	At3g54420	Endochitinase EP3	GeneID:115704652	GO:0005618,GO:0008061,GO:0004568,GO:0016998,GO:0006032,GO:0006952,GO:0000272,GO:0009617,GO:0009611,GO:0010262	cell wall|chitin binding|chitinase activity|cell wall macromolecule catabolic process|chitin catabolic process|defense response|polysaccharide catabolic process|response to bacterium|response to wounding|somatic embryogenesis
LOC115704758	darkorange	3.59686	2.91297	2.82287	1.90981	2.0654	2.08706	2.46411	3.20893				GeneID:115704758
LOC115704787	darkorange	2.98595	2.38062	1.46829	1.08195	1.99993	1.84596	1.83544	2.83165		At2g30020	Probable protein phosphatase 2C 25	GeneID:115704787	GO:0005634,GO:0009536,GO:0046872,GO:0004722,GO:0009738,GO:0050832,GO:0009620,GO:0009611	nucleus|plastid|metal ion binding|protein serine/threonine phosphatase activity|abscisic acid-activated signaling pathway|defense response to fungus|response to fungus|response to wounding
LOC115704859	darkorange	6.64627	5.18945	5.26068	3.17714	4.49737	3.91515	3.60218	4.69252	NBS		Norbelladine synthase	GeneID:115704859	GO:0005789,GO:0016021,GO:0005774,GO:0050474,GO:1901010,GO:0006952,GO:0002238	endoplasmic reticulum membrane|integral component of membrane|vacuolar membrane|(S)-norcoclaurine synthase activity|(S)-reticuline metabolic process|defense response|response to molecule of fungal origin
LOC115704978	darkorange	4.49066	3.95731	4.35829	3.42422	2.90887	3.7872	3.46518	3.81985	DER1.1		Derlin-1.1	GeneID:115704978	GO:0005789,GO:0016021	endoplasmic reticulum membrane|integral component of membrane	ko04141	Protein processing in endoplasmic reticulum
LOC115705568	darkorange	2.22698	1.02638	2.20512	0.589925	1.05038	1.33202	0.802066	1.19926	UXS5	At3g46440	UDP-glucuronic acid decarboxylase 5	GeneID:115705568	GO:0005737,GO:0005829,GO:0070403,GO:0048040,GO:0042732,GO:0033320	cytoplasm|cytosol|NAD+ binding|UDP-glucuronate decarboxylase activity|D-xylose metabolic process|UDP-D-xylose biosynthetic process	ko00520	Amino sugar and nucleotide sugar metabolism
LOC115705814	darkorange	7.03716	1.98023	5.05018	1.7555	3.77382	2.82315	2.53979	4.26498			Pathogenesis-related protein PRB1-2	GeneID:115705814	GO:0005576,GO:0006952,GO:0009607	extracellular region|defense response|response to biotic stimulus	ko04016,ko04075,ko04626	MAPK signaling pathway - plant|Plant hormone signal transduction|Plant-pathogen interaction
LOC115706077	darkorange	3.80398	2.80158	2.62304	2.13972	3.48563	2.90395	3.26588	3.49469	NBS		Norbelladine synthase	GeneID:115706077	GO:0005789,GO:0016021,GO:0005774,GO:0050474,GO:1901010,GO:0006952,GO:0002238	endoplasmic reticulum membrane|integral component of membrane|vacuolar membrane|(S)-norcoclaurine synthase activity|(S)-reticuline metabolic process|defense response|response to molecule of fungal origin
LOC115706553	darkorange	3.46571	1.29468	1.15325	0.666426	0.808609	1.19476	0.570751	0.830518	UAF30	YOR295W	Upstream activation factor subunit UAF30	GeneID:115706553	GO:0005730,GO:0000500,GO:0001181,GO:0001165,GO:0006325,GO:0042790	nucleolus|RNA polymerase I upstream activating factor complex|RNA polymerase I general transcription initiation factor activity|RNA polymerase I upstream control element sequence-specific DNA binding|chromatin organization|nucleolar large rRNA transcription by RNA polymerase I
LOC115706680	darkorange	1.94129	0.738656	0.545032	0.556731	1.02255	1.23163	0.373396	2.06669				GeneID:115706680
LOC115707396	darkorange	1.78968	0.317569	0	0.0447889	0.579009	0.544332	0.148979	0.605959	PP16-1	At3g55470	16 kDa phloem protein 1	GeneID:115707396
LOC115707831	darkorange	2.27728	1.10113	0.869779	0.626202	0.788678	1.70825	1.02976	2.25703			Basic secretory protease	GeneID:115707831	GO:0046872,GO:0008237	metal ion binding|metallopeptidase activity
LOC115708258	darkorange	1.86663	0.951998	1.58313	0.442585	0	1.2926	0	0.519426	EPFL3	At3g13898	MEPFL3	GeneID:115708258	GO:0005576,GO:0010052,GO:0010374	extracellular region|guard cell differentiation|stomatal complex development
LOC115709089	darkorange	2.60979	1.47226	1.66034	0.919926	0.866995	0.589035	0.460615	1.07553	CYP93A3		Cytochrome P450 93A3	GeneID:115709089	GO:0016021,GO:0016020,GO:0020037,GO:0005506,GO:0016709	integral component of membrane|membrane|heme binding|iron ion binding|oxidoreductase activity,acting on paired donors, with incorporation or reduction of molecular oxygen, NAD(P)H as one donor, and incorporation of one atom of oxygen
LOC115710098	darkorange	4.8021	1.94786	3.72349	1.49216	1.61613	0.83817	1.25246	1.78527	GNS1		Glucan endo-1,3-beta-glucosidase, basic isoform	GeneID:115710098	GO:0042973,GO:0005975,GO:0006952,GO:0009607	glucan endo-1,3-beta-D-glucosidase activity|carbohydrate metabolic process|defense response|response to biotic stimulus
LOC115710115	darkorange	1.89684	1.49191	2.34177	1.04344	1.02761	1.66405	0.817769	1.42285	GET1	At4g16444	Protein GET1	GeneID:115710115
LOC115710607	darkorange	4.57755	4.29588	4.03639	2.63324	3.44824	3.1972	3.31862	3.42651	MPT3	At5g14040	Mitochondrial phosphate carrier protein 3, mitochondrial	GeneID:115710607	GO:0005618,GO:0009507,GO:0031305,GO:0016020,GO:0005739,GO:0005774,GO:0005315,GO:0035435,GO:0009651	cell wall|chloroplast|integral component of mitochondrial inner membrane|membrane|mitochondrion|vacuolar membrane|inorganic phosphate transmembrane transporter activity|phosphate ion transmembrane transport|response to salt stress
LOC115711541	darkorange	3.37609	2.13131	3.33375	2.09622	2.22904	2.94023	2.32586	2.61624	RPL7A	At1g80750	60S ribosomal protein L7-1	GeneID:115711541	GO:0005829,GO:0022625,GO:0005730,GO:0003735,GO:0000463	cytosol|cytosolic large ribosomal subunit|nucleolus|structural constituent of ribosome|maturation of LSU-rRNA from tricistronic rRNA transcript (SSU-rRNA, 5.8S rRNA, LSU-rRNA)	ko03010	Ribosome
LOC115712285	darkorange	2.15435	1.39973	1.41314	0.906125	2.31546	1.32182	1.31827	2.10959	LRK10L-11	At1g25390	LEAF RUST 10 DISEASE-RESISTANCE LOCUS RECEPTOR-LIKE PROTEIN KINASE-like 1.1	GeneID:115712285
LOC115712426	darkorange	1.72266	0.968861	0.702544	0.0552047	0.160244	0.0987884	0.238086	0.664651	CEQORH	At4g13010	Chloroplast envelope quinone oxidoreductase homolog	GeneID:115712426	GO:0009507,GO:0009941,GO:0009706,GO:0009535,GO:0005886,GO:0005773,GO:0016491	chloroplast|chloroplast envelope|chloroplast inner membrane|chloroplast thylakoid membrane|plasma membrane|vacuole|oxidoreductase activity	ko00592	alpha-Linolenic acid metabolism
LOC115714087	darkorange	3.07421	2.43844	1.68616	0.780792	2.9561	2.20418	0.660928	2.50533	Cht10	Os01g0287600	Chitinase 10	GeneID:115714087	GO:0004568,GO:0016998,GO:0006032,GO:0000272	chitinase activity|cell wall macromolecule catabolic process|chitin catabolic process|polysaccharide catabolic process
LOC115715620	darkorange	4.3024	3.29222	3.10932	2.34668	1.76359	2.67775	2.28204	3.06658	CYP75B137		Flavonoid 3'-monooxygenase CYP75B137	GeneID:115715620
LOC115715768	darkorange	2.376	0.975625	1.10747	0.321509	0.66337	0.400731	0.345046	0.777433	CYP75B137		Flavonoid 3'-monooxygenase CYP75B137	GeneID:115715768
LOC115715891	darkorange	2.71862	1.59443	1.81595	1.44536	1.12601	1.48378	1.42263	2.15482	ATL22	At2g25410	RING-H2 finger protein ATL22	GeneID:115715891	GO:0016021,GO:0046872,GO:0016740,GO:0016567	integral component of membrane|metal ion binding|transferase activity|protein ubiquitination
LOC115716715	darkorange	3.29901	3.58167	2.67111	1.96291	2.82882	3.01207	2.71582	3.70208	TLP		Thaumatin-like protein	GeneID:115716715
LOC115720784	darkorange	2.69577	1.93589	2.40921	1.34377	1.53977	1.94469	1.29671	2.50605		At2g37660	Uncharacterized protein At2g37660, chloroplastic	GeneID:115720784	GO:0048046,GO:0009507,GO:0009570,GO:0009579,GO:0005507,GO:0042742	apoplast|chloroplast|chloroplast stroma|thylakoid|copper ion binding|defense response to bacterium
LOC115721107	darkorange	7.42658	6.6715	6.81304	5.90358	5.67259	6.79642	6.11578	7.103	HEL	At3g04720	CD-HEL	GeneID:115721107	GO:0005773,GO:0008061,GO:0004540,GO:0042742,GO:0009817,GO:0031640,GO:0009723,GO:0080027,GO:0009651,GO:0009615,GO:0009627	vacuole|chitin binding|ribonuclease activity|defense response to bacterium|defense response to fungus, incompatible interaction|killing of cells of other organism|response to ethylene|response to herbivore|response to salt stress|response to virus|systemic acquired resistance
LOC115721992	darkorange	1.80539	1.18763	1.04653	0.444552	0.249781	0.251042	0.171604	0.369851	CYP71AU50		Cytochrome P450 71AU50	GeneID:115721992
LOC115722015	darkorange	5.03722	3.52379	3.20508	2.01364	2.0098	2.99937	3.02854	3.69078	STH-2		Pathogenesis-related protein STH-2	GeneID:115722015	GO:0006952,GO:0009607	defense response|response to biotic stimulus
LOC115723095	darkorange	3.31113	2.26116	1.89422	0.544823	1.10721	0.477501	0.472991	1.02378			Probable monoterpene synthase MTS1, chloroplastic	GeneID:115723095	GO:0009507,GO:0000287,GO:0010333	chloroplast|magnesium ion binding|terpene synthase activity

## Sheet: greenyellow_91
Supplementary Table S6: Genes of module (XLS).
greenyellow module
Gene id	Modules	Cs4XF1	Cs4XF2	Cs4XF3	Cs4XF4	Cs2XF1	Cs2XF2	Cs2XF3	Cs2XF4	gene_symbol	gene_homologs	description	gene_Dbxref	GO_id	GO_term	pathway	pathway_description
LOC115695492	Supplementary Table S7: greenyellow	0	0	0	0	0	1.47656	0	0.781657				GeneID:115695492
LOC115695866	greenyellow	2.33957	2.3458	3.97869	3.2535	2.47696	6.43352	2.39358	5.2202			Alpha-humulene synthase	GeneID:115695866	GO:0000287,GO:0010333,GO:0016114	magnesium ion binding|terpene synthase activity|terpenoid biosynthetic process
LOC115696781	greenyellow	1.07201	1.0551	1.95526	1.24416	1.5558	2.55499	1.36407	1.96929				GeneID:115696781
LOC115696808	greenyellow	0	0.101736	0	0	0	3.01095	0	1.89165				GeneID:115696808
LOC115696873	greenyellow	0.187095	0	0.0554203	0.373883	0.0560268	2.31663	0.0535293	0.860939				GeneID:115696873
LOC115697099	greenyellow	1.31491	1.53169	1.19241	0.885713	1.0152	2.42119	1.39215	3.07296	SDR2a	At3g51680	Short-chain dehydrogenase reductase 2a	GeneID:115697099	GO:0016491	oxidoreductase activity
LOC115697117	greenyellow	0	0.327643	0.149154	0.1854	0.150734	1.70937	0.506431	1.43434			Non-specific lipid-transfer protein 1	GeneID:115697117	GO:0008289,GO:0006869	lipid binding|lipid transport
LOC115697122	greenyellow	0.0698447	0	0.0787677	0	0	5.25977	0.282927	3.51459			Non-specific lipid-transfer protein 1	GeneID:115697122	GO:0008289,GO:0006869	lipid binding|lipid transport
LOC115697599	greenyellow	0	0	0	0	0.669486	1.47574	0.215436	0.786181				GeneID:115697599
LOC115697753	greenyellow	0.053461	0.765364	0.555602	0.989709	0.701476	4.62819	0.194441	2.75461	ACPD		Stearoyl-[acyl-carrier-protein] 9-desaturase, chloroplastic	GeneID:115697753	GO:0009570,GO:0045300,GO:0046872,GO:0102786,GO:0004768,GO:0006952,GO:0006633,GO:0006631	chloroplast stroma|acyl-[acyl-carrier-protein] desaturase activity|metal ion binding|stearoyl-[acp] desaturase activity|stearoyl-CoA 9-desaturase activity|defense response|fatty acid biosynthetic process|fatty acid metabolic process	ko00061,ko01040	Fatty acid biosynthesis|Biosynthesis of unsaturated fatty acids
LOC115697831	greenyellow	0.965036	1.08212	1.26815	1.21496	1.33615	2.95532	1.77872	3.22887	PLP7	At3g54950	Patatin-like protein 7	GeneID:115697831	GO:0005886,GO:0047617,GO:0004620,GO:0019374,GO:0016042,GO:0006644,GO:0040008,GO:0051707	plasma membrane|acyl-CoA hydrolase activity|phospholipase activity|galactolipid metabolic process|lipid catabolic process|phospholipid metabolic process|regulation of growth|response to other organism
LOC115698775	greenyellow	0	0	0	0	1.30995	3.70388	0.967377	2.73984				GeneID:115698775
LOC115698890	greenyellow	0.0493395	0	0	0	0	3.32246	0.053793	2.55771				GeneID:115698890
LOC115699050	greenyellow	0	0	0	0	0.132786	1.9485	0.243745	1.47519	HMGCL	At2g26800	Hydroxymethylglutaryl-CoA lyase, mitochondrial	GeneID:115699050	GO:0005759,GO:0005739,GO:0004419,GO:0046872,GO:0046951,GO:0006552,GO:0006629	mitochondrial matrix|mitochondrion|hydroxymethylglutaryl-CoA lyase activity|metal ion binding|ketone body biosynthetic process|leucine catabolic process|lipid metabolic process	ko00072,ko00280,ko00650,ko04146	Synthesis and degradation of ketone bodies|Valine, leucine and isoleucine degradation|Butanoate metabolism|Peroxisome
LOC115700277	greenyellow	0	0	0.0300175	0	0.226599	2.14411	0.165767	1.5172	3AT2	At1g03495	Coumaroyl-CoA:anthocyanidin 3-O-glucoside-6''-O-coumaroyltransferase 2	GeneID:115700277	GO:0016747	transferase activity, transferring acyl groups other than amino-acyl groups
LOC115700517	greenyellow	0.197502	0.271673	0.151401	0.301215	0.291326	2.42959	0.146397	1.54685	MIF2	At3g28917	Mini zinc finger protein 2	GeneID:115700517	GO:0005737,GO:0005634,GO:0003677,GO:0046872,GO:0042803,GO:0010582,GO:0035670	cytoplasm|nucleus|DNA binding|metal ion binding|protein homodimerization activity|floral meristem determinacy|plant-type ovary development
LOC115700862	greenyellow	2.57361	2.86359	2.95457	2.35964	2.8311	3.53991	2.54664	4.07555	MLP34	At1g70850	MLP-like protein 34	GeneID:115700862	GO:0006952	defense response
LOC115703010	greenyellow	2.31251	2.1418	2.44327	2.24052	1.87099	3.61704	2.30724	3.01907	RTNLB11	At3g19460	Reticulon-like protein B11	GeneID:115703010	GO:0005789,GO:0016021	endoplasmic reticulum membrane|integral component of membrane
LOC115703170	greenyellow	1.51425	2.10525	1.55516	2.05799	2.03696	3.12886	1.50857	2.41934	HSD3	At3g47360	11-beta-hydroxysteroid dehydrogenase-like 3	GeneID:115703170	GO:0016021,GO:0016491,GO:0006694	integral component of membrane|oxidoreductase activity|steroid biosynthetic process
LOC115703577	greenyellow	3.68386	3.78577	3.80268	3.47429	3.29833	5.34036	3.64004	4.32813	ERD2		ER lumen protein-retaining receptor	GeneID:115703577	GO:0005789,GO:0016021,GO:0046923,GO:0006621,GO:0015031,GO:0016192	endoplasmic reticulum membrane|integral component of membrane|ER retention sequence binding|protein retention in ER lumen|protein transport|vesicle-mediated transport
LOC115703736	greenyellow	3.93672	3.24802	2.84103	3.63578	3.47755	4.63022	3.68953	3.84653	SAUR32	At2g46690	Auxin-responsive protein SAUR32	GeneID:115703736	GO:0005737,GO:0005634,GO:0009734,GO:0007275,GO:0040008,GO:1900140	cytoplasm|nucleus|auxin-activated signaling pathway|multicellular organism development|regulation of growth|regulation of seedling development
LOC115703909	greenyellow	0.0665888	0	0.0751066	0	0	2.37396	0	1.66955				GeneID:115703909
LOC115704401	greenyellow	0.432669	0.0743982	0.154505	0	0.156139	2.39298	0.149404	1.63719				GeneID:115704401			ko03013,ko03015	RNA transport|mRNA surveillance pathway
LOC115704518	greenyellow	1.49801	1.1329	1.59125	1.06407	1.07585	3.76188	1.73841	3.22386				GeneID:115704518
LOC115704724	greenyellow	0	0	0	0	0	1.65433	0	0.855	PDI		Protein disulfide-isomerase	GeneID:115704724	GO:0005788,GO:0003756,GO:0045454	endoplasmic reticulum lumen|protein disulfide isomerase activity|cell redox homeostasis	ko04141	Protein processing in endoplasmic reticulum
LOC115705395	greenyellow	0.578055	0.11427	0.371212	0.777593	0.236374	3.07533	0.539217	0.236806	LHCA6	At1g19150	Photosystem I chlorophyll a/b-binding protein 6, chloroplastic	GeneID:115705395	GO:0009507,GO:0009941,GO:0009535,GO:0016021,GO:0009522,GO:0010287,GO:0016168,GO:0046872,GO:0009768,GO:0018298,GO:0009637,GO:0010218,GO:0009416,GO:0010114	chloroplast|chloroplast envelope|chloroplast thylakoid membrane|integral component of membrane|photosystem I|plastoglobule|chlorophyll binding|metal ion binding|photosynthesis, light harvesting in photosystem I|protein-chromophore linkage|response to blue light|response to far red light|response to light stimulus|response to red light	ko00196	Photosynthesis - antenna proteins
LOC115705403	greenyellow	1.87354	0.849086	1.33665	1.64332	0.956538	2.56518	1.69014	2.20766				GeneID:115705403
LOC115705678	greenyellow	1.85359	1.96225	2.31637	2.22804	2.42498	3.71103	2.04956	2.83666	DHAR2	At1g75270	Glutathione S-transferase DHAR2	GeneID:115705678	GO:0005829,GO:0005886,GO:0043295,GO:0045174,GO:0004364,GO:0080151,GO:0010731	cytosol|plasma membrane|glutathione binding|glutathione dehydrogenase (ascorbate) activity|glutathione transferase activity|positive regulation of salicylic acid mediated signaling pathway|protein glutathionylation	ko00053,ko00480	Ascorbate and aldarate metabolism|Glutathione metabolism
LOC115706065	greenyellow	2.8863	2.81376	3.06525	2.7052	2.09749	3.85648	2.4394	3.95605	KCS1	At1g01120	3-ketoacyl-CoA synthase 1	GeneID:115706065	GO:0022626,GO:0005783,GO:0005789,GO:0016021,GO:0016020,GO:0102336,GO:0102337,GO:0102338,GO:0009922,GO:0102756,GO:0006633,GO:0009409,GO:0009416,GO:0010025	cytosolic ribosome|endoplasmic reticulum|endoplasmic reticulum membrane|integral component of membrane|membrane|3-oxo-arachidoyl-CoA synthase activity|3-oxo-cerotoyl-CoA synthase activity|3-oxo-lignoceronyl-CoA synthase activity|fatty acid elongase activity|very-long-chain 3-ketoacyl-CoA synthase activity|fatty acid biosynthetic process|response to cold|response to light stimulus|wax biosynthetic…	ko00062,ko04626	Fatty acid elongation|Plant-pathogen interaction
LOC115706304	greenyellow	0.0252417	0.153386	0.0839307	0.244103	1.85787	4.28499	1.54005	3.36378	UBA1C	At2g19380	UBP1-associated proteins 1C	GeneID:115706304	GO:0005634,GO:1990904,GO:0003723,GO:0008270	nucleus|ribonucleoprotein complex|RNA binding|zinc ion binding
LOC115706409	greenyellow	3.02707	1.92185	2.25935	2.10526	2.13219	4.26368	1.99338	3.85887			Basic secretory protease	GeneID:115706409	GO:0046872,GO:0008237	metal ion binding|metallopeptidase activity
LOC115706762	greenyellow	1.70074	1.65336	2.03784	1.66897	1.56397	3.46523	1.70533	2.29031	DPB4	DEHA2G08756g	DNA polymerase epsilon subunit D	GeneID:115706762	GO:0005634,GO:0003887,GO:0046982,GO:0006260	nucleus|DNA-directed DNA polymerase activity|protein heterodimerization activity|DNA replication	ko03030,ko03410,ko03420	DNA replication|Base excision repair|Nucleotide excision repair
LOC115706878	greenyellow	1.0291	0.783935	0.944918	1.1452	1.33141	2.81897	1.45695	2.17949				GeneID:115706878
LOC115707219	greenyellow	0.989581	1.27215	0.455929	0.856862	0.78791	2.65314	0.587122	3.66004	MYB73	At4g37260	Transcription factor MYB73	GeneID:115707219	GO:0005634,GO:0003700,GO:0043565,GO:0044212,GO:0019760,GO:1901001,GO:0010929,GO:0006355,GO:0009737,GO:0046686,GO:0010200,GO:0009723,GO:0009753,GO:0009751	nucleus|DNA-binding transcription factor activity|sequence-specific DNA binding|transcription regulatory region DNA binding|glucosinolate metabolic process|negative regulation of response to salt stress|positive regulation of auxin mediated signaling pathway|regulation of transcription, DNA-templated|response to abscisic acid|response to cadmium ion|response to chitin|response to ethylene|respons…
LOC115708114	greenyellow	0	0	0	0	0	1.53267	0	0.85482				GeneID:115708114
LOC115708260	greenyellow	2.04374	2.2359	2.57664	1.91272	2.35152	7.05886	2.31132	5.90794	RPS27B	At3g61110	40S ribosomal protein S27-2	GeneID:115708260	GO:0005618,GO:0022626,GO:0022627,GO:0009506,GO:0042788,GO:0005840,GO:0046872,GO:0003735,GO:0000028,GO:0006412	cell wall|cytosolic ribosome|cytosolic small ribosomal subunit|plasmodesma|polysomal ribosome|ribosome|metal ion binding|structural constituent of ribosome|ribosomal small subunit assembly|translation	ko03010	Ribosome
LOC115708262	greenyellow	3.62318	3.64852	3.66913	3.48583	3.08365	4.70933	3.46343	4.95181	OFP13	At5g04820	Transcription repressor OFP13	GeneID:115708262	GO:0005634,GO:0045892	nucleus|negative regulation of transcription, DNA-templated
LOC115708680	greenyellow	1.85867	2.11842	1.94429	2.30898	2.67919	3.31565	2.39507	3.12541	NFD4	At1g31470	Protein NUCLEAR FUSION DEFECTIVE 4	GeneID:115708680	GO:0016021,GO:0005739,GO:0000741,GO:0010197,GO:0009651	integral component of membrane|mitochondrion|karyogamy|polar nucleus fusion|response to salt stress
LOC115708845	greenyellow	0.891468	0.930344	0.924647	0.762077	0.932244	5.64484	1.30289	4.36604				GeneID:115708845
LOC115709034	greenyellow	2.74481	0	0	0.0871158	0	3.69073	0.0507315	2.65833	MADS1	VIT_12s0142g00360	Agamous-like MADS-box protein MADS1	GeneID:115709034
LOC115710172	greenyellow	3.00807	3.49735	2.46333	2.83375	2.57585	4.58447	3.15706	3.39401				GeneID:115710172
LOC115710335	greenyellow	0	0	0	0	0	1.28077	0.209905	0.990101	LAMT		Loganic acid O-methyltransferase	GeneID:115710335
LOC115710361	greenyellow	4.92295	4.68526	5.91128	5.13197	5.22654	6.17356	4.94484	5.52717	CYP81E8		Cytochrome P450 81E8	GeneID:115710361	GO:0016021,GO:0020037,GO:0005506,GO:0004497,GO:0016705	integral component of membrane|heme binding|iron ion binding|monooxygenase activity|oxidoreductase activity, acting on paired donors, with incorporation or reduction of molecular oxygen
LOC115710379	greenyellow	0.851826	0.827799	0.581689	1.17023	1.50649	2.4927	1.08302	1.78401	NFD4	At1g31470	Protein NUCLEAR FUSION DEFECTIVE 4	GeneID:115710379	GO:0016021,GO:0005739,GO:0000741,GO:0010197,GO:0009651	integral component of membrane|mitochondrion|karyogamy|polar nucleus fusion|response to salt stress
LOC115710643	greenyellow	2.295	1.43901	1.46673	1.30027	1.90715	3.07606	2.2113	3.1019	UGT73C6	At2g36790	UDP-glycosyltransferase 73C6	GeneID:115710643	GO:0043231,GO:0080043,GO:0080046,GO:0080044,GO:0035251,GO:0008194,GO:0051555	intracellular membrane-bounded organelle|quercetin 3-O-glucosyltransferase activity|quercetin 4'-O-glucosyltransferase activity|quercetin 7-O-glucosyltransferase activity|UDP-glucosyltransferase activity|UDP-glycosyltransferase activity|flavonol biosynthetic process	ko00908	Zeatin biosynthesis
LOC115711192	greenyellow	1.32438	0.734581	0.865922	0.465604	0.680101	4.23206	0.928595	3.3729	GAMMACAL1	At5g63510	Gamma carbonic anhydrase-like 1, mitochondrial	GeneID:115711192	GO:0031966,GO:0046872	mitochondrial membrane|metal ion binding
LOC115711419	greenyellow	0	0.0425182	0.0893452	0.0381721	0.0231134	2.81242	0.0652276	1.88395		At5g63520	F-box/LRR-repeat protein At5g63520	GeneID:115711419
LOC115711534	greenyellow	5.79947	3.34836	4.81857	5.03577	4.67844	6.00228	5.32353	6.02617	PAP3	At1g14700	Purple acid phosphatase 3	GeneID:115711534	GO:0005576,GO:0005773,GO:0003993,GO:0046872	extracellular region|vacuole|acid phosphatase activity|metal ion binding	ko00740	Riboflavin metabolism
LOC115712291	greenyellow	0.933366	0.855553	0.114144	0.229914	1.08671	2.00487	0.744592	1.32279				GeneID:115712291
LOC115712365	greenyellow	0	0.168687	0.0377249	0.0317306	0.21504	2.70532	0.140506	1.55221			Probable methyltransferase TCM_000336	GeneID:115712365	GO:0046872,GO:0008168	metal ion binding|methyltransferase activity
LOC115712413	greenyellow	0	0	0	0	0	2.69956	0	1.521	GSTT3	At5g41220	Glutathione S-transferase T3	GeneID:115712413	GO:0005737,GO:0005634,GO:0004364,GO:0009407	cytoplasm|nucleus|glutathione transferase activity|toxin catabolic process
LOC115712474	greenyellow	0.794813	0.27211	0.529444	0.301695	0.858044	2.02538	0.849942	1.48793				GeneID:115712474
LOC115712691	greenyellow	0.209412	0	0	0	0	1.41253	0.0602487	1.05263				GeneID:115712691
LOC115712787	greenyellow	2.99106	2.88174	2.36586	2.51793	3.27137	3.90734	2.45803	3.49712	COR2		Non-functional NADPH-dependent codeinone reductase 2	GeneID:115712787	GO:0005829,GO:0016491	cytosol|oxidoreductase activity
LOC115712849	greenyellow	3.76234	3.13538	4.29458	3.93687	3.844	4.67834	3.7841	4.81974	CAD		Probable mannitol dehydrogenase	GeneID:115712849	GO:0046029,GO:0008270	mannitol dehydrogenase activity|zinc ion binding
LOC115713404	greenyellow	0	0	0	0	0	1.94065	0	1.40556	RKS1	At1g11340	G-type lectin S-receptor-like serine/threonine-protein kinase RKS1	GeneID:115713404
LOC115713528	greenyellow	0.400476	0.053328	0.342677	0.0635133	0.283186	1.46373	0.191984	1.85573	LECRK2		G-type lectin S-receptor-like serine/threonine-protein kinase LECRK2	GeneID:115713528	GO:0016021,GO:0005524,GO:0030246,GO:0004674,GO:0006952	integral component of membrane|ATP binding|carbohydrate binding|protein serine/threonine kinase activity|defense response
LOC115713864	greenyellow	1.26188	2.28299	2.76537	2.49732	1.72685	5.03186	2.10692	3.73176				GeneID:115713864
LOC115713888	greenyellow	0.154683	0	0.089522	0.147264	0	3.56525	0.127882	2.54516	MST4	Os03g0218400	Sugar transport protein MST4	GeneID:115713888	GO:0005887,GO:0005351,GO:0005355,GO:0008645	integral component of plasma membrane|carbohydrate:proton symporter activity|glucose transmembrane transporter activity|hexose transmembrane transport
LOC115714539	greenyellow	0.826222	0.617325	0.542279	0.976782	1.19002	2.0421	0.844135	1.65869	SEOC	At1g67790	Protein SIEVE ELEMENT OCCLUSION C	GeneID:115714539	GO:0010088	phloem development
LOC115714865	greenyellow	0	0	0	0	0	2.52439	0.255914	1.06447	ORP2A	At4g22540	Oxysterol-binding protein-related protein 2A	GeneID:115714865	GO:0005829,GO:0043231,GO:0016020,GO:0008289,GO:0032934,GO:0015248	cytosol|intracellular membrane-bounded organelle|membrane|lipid binding|sterol binding|sterol transporter activity
LOC115714880	greenyellow	0.165237	0	0.0486828	0.0808126	0	1.62931	0	1.31628				GeneID:115714880
LOC115714935	greenyellow	1.6745	1.9616	2.31073	1.72148	1.93854	3.07605	2.24196	3.31874				GeneID:115714935
LOC115715320	greenyellow	0.126463	0.13362	0.0963885	0.12034	0	2.68803	0.341154	2.26609	RABA5B	At3g07410	Ras-related protein RABA5b	GeneID:115715320	GO:0005622,GO:0005886,GO:0005525,GO:0003924,GO:0006886,GO:0032482	intracellular|plasma membrane|GTP binding|GTPase activity|intracellular protein transport|Rab protein signal transduction
LOC115715575	greenyellow	1.44777	1.57178	1.61354	1.52429	1.94128	2.83605	1.25679	2.392	MAG2L	At1g08400	RINT1-like protein MAG2L	GeneID:115715575	GO:0030142,GO:0030134,GO:0070939,GO:0005783,GO:0005789,GO:0007030,GO:0015031,GO:0060628,GO:1902504,GO:0006890	COPI-coated Golgi to ER transport vesicle|COPII-coated ER to Golgi transport vesicle|Dsl1/NZR complex|endoplasmic reticulum|endoplasmic reticulum membrane|Golgi organization|protein transport|regulation of ER to Golgi vesicle-mediated transport|regulation of signal transduction involved in mitotic G2 DNA damage checkpoint|retrograde vesicle-mediated transport, Golgi to ER
LOC115715639	greenyellow	0.569293	0.402854	1.0118	0.583771	0.590703	2.10667	0.654039	1.25408	DTX35	At4g25640	Protein DETOXIFICATION 35	GeneID:115715639	GO:0016021,GO:0005774,GO:0005773,GO:0015297,GO:0015238,GO:0006855,GO:0009813	integral component of membrane|vacuolar membrane|vacuole|antiporter activity|drug transmembrane transporter activity|drug transmembrane transport|flavonoid biosynthetic process
LOC115715712	greenyellow	0	0.0356048	0.12882	0.0160673	0	2.24202	0	2.0537	CNGC1	At5g53130	Cyclic nucleotide-gated ion channel 1	GeneID:115715712	GO:0016021,GO:0005886,GO:0005516,GO:0030552,GO:0030553,GO:0005216	integral component of membrane|plasma membrane|calmodulin binding|cAMP binding|cGMP binding|ion channel activity	ko04626	Plant-pathogen interaction
LOC115715897	greenyellow	2.94728	2.36894	3.11285	2.8207	2.51796	4.0866	1.85828	4.23957	PAR		Phenylacetaldehyde reductase	GeneID:115715897	GO:0005783,GO:0005634,GO:0050662,GO:0016491,GO:0016616,GO:0009555,GO:0010584,GO:0048316,GO:0080110	endoplasmic reticulum|nucleus|coenzyme binding|oxidoreductase activity|oxidoreductase activity, acting on the CH-OH group of donors, NAD or NADP as acceptor|pollen development|pollen exine formation|seed development|sporopollenin biosynthetic process
LOC115715996	greenyellow	0.365591	0.360283	0.597137	0.281162	0.602582	4.9419	0.81953	3.83149	PLR_Lu2		Bifunctional pinoresinol-lariciresinol reductase 2	GeneID:115715996	GO:0010284,GO:0010283,GO:1902132,GO:1902131,GO:1902125,GO:1902138,GO:0009807	lariciresinol reductase activity|pinoresinol reductase activity|(+)-lariciresinol biosynthetic process|(+)-lariciresinol catabolic process|(+)-pinoresinol catabolic process|(-)-secoisolariciresinol biosynthetic process|lignan biosynthetic process	ko00998	Biosynthesis of various secondary metabolites - part 2
LOC115716168	greenyellow	2.13759	1.44102	1.9235	0.913839	0.874586	3.38565	1.39806	1.96462	DIR5	At1g64160	Dirigent protein 5	GeneID:115716168	GO:0048046,GO:0042349,GO:1901599	apoplast|guiding stereospecific synthesis activity|(-)-pinoresinol biosynthetic process
LOC115716716	greenyellow	3.05656	3.25712	1.86687	1.00554	3.90759	5.15699	2.44025	5.65927	OSM34	At4g11650	Osmotin-like protein OSM34	GeneID:115716716	GO:0009816,GO:0009817,GO:0009651	defense response to bacterium, incompatible interaction|defense response to fungus, incompatible interaction|response to salt stress
LOC115717374	greenyellow	1.4348	1.23468	1.65132	0.854995	1.13146	2.11101	1.12988	2.65524				GeneID:115717374
LOC115718515	greenyellow	0.20056	0.127179	0.224934	0.0827136	0.700935	2.01101	0.267325	1.20953	PDR3		Pleiotropic drug resistance protein 3	GeneID:115718515	GO:0016021,GO:0005524,GO:0016887	integral component of membrane|ATP binding|ATPase activity
LOC115719767	greenyellow	3.07012	2.30402	3.15877	3.31654	2.93441	4.38934	3.29125	3.44467	UGT71K2		UDP-glycosyltransferase 71K2	GeneID:115719767	GO:0035251	UDP-glucosyltransferase activity
LOC115720673	greenyellow	0.0783508	0.24757	0.0883276	0.0865485	1.6696	2.78108	0.057455	1.96231		At4g27290	G-type lectin S-receptor-like serine/threonine-protein kinase At4g27290	GeneID:115720673
LOC115720812	greenyellow	0.60168	0.630543	0.792249	0.49516	0.199107	2.9348	0.248968	1.92454				GeneID:115720812
LOC115720822	greenyellow	0	0	0	0	0.579238	1.52995	0.359493	1.23746	bVPE	At1g62710	Vacuolar-processing enzyme beta-isozyme	GeneID:115720822	GO:0000326,GO:0004197,GO:0051603,GO:0006624	protein storage vacuole|cysteine-type endopeptidase activity|proteolysis involved in cellular protein catabolic process|vacuolar protein processing
LOC115720994	greenyellow	0	0	0	0	0.567947	3.52225	0	2.05629				GeneID:115720994
LOC115721930	greenyellow	1.16584	1.31504	2.50834	1.95037	1.90297	2.67893	1.49091	2.50678	COMT1		Caffeic acid 3-O-methyltransferase	GeneID:115721930	GO:0047763,GO:0046983,GO:0009809	caffeate O-methyltransferase activity|protein dimerization activity|lignin biosynthetic process	ko00940	Phenylpropanoid biosynthesis
LOC115721935	greenyellow	2.34693	1.55328	1.60855	1.44373	1.8146	2.76261	1.18601	1.85528	PT1		Low affinity inorganic phosphate transporter 1	GeneID:115721935	GO:0005794,GO:0016021,GO:0016020,GO:0005634,GO:0005886,GO:0009506,GO:0005773,GO:0005315,GO:0015293,GO:0006817,GO:0009737	Golgi apparatus|integral component of membrane|membrane|nucleus|plasma membrane|plasmodesma|vacuole|inorganic phosphate transmembrane transporter activity|symporter activity|phosphate ion transport|response to abscisic acid
LOC115722400	greenyellow	0	0	0	0	1.95609	3.79201	0	2.49567	UGT75L17		Phloretin 4'-O-glucosyltransferase	GeneID:115722400	GO:0043231,GO:0080043,GO:0080044,GO:0008194	intracellular membrane-bounded organelle|quercetin 3-O-glucosyltransferase activity|quercetin 7-O-glucosyltransferase activity|UDP-glycosyltransferase activity
LOC115722892	greenyellow	2.15633	1.84546	3.1954	2.99834	1.3833	5.64112	3.2272	4.82471	CYP94A1		Cytochrome P450 94A1	GeneID:115722892	GO:0005789,GO:0016021,GO:0020037,GO:0005506,GO:0004497,GO:0016705	endoplasmic reticulum membrane|integral component of membrane|heme binding|iron ion binding|monooxygenase activity|oxidoreductase activity, acting on paired donors, with incorporation or reduction of molecular oxygen
LOC115723952	greenyellow	0	0.0537338	0.0573157	0	0	2.29706	0.0553612	0.910647				GeneID:115723952
LOC115724614	greenyellow	4.22303	3.70874	3.9048	3.76664	3.5938	5.38701	4.0376	4.84954	CYP71D9		Cytochrome P450 71D9	GeneID:115724614	GO:0016020,GO:0020037,GO:0005506,GO:0016709	membrane|heme binding|iron ion binding|oxidoreductase activity,acting on paired donors, with incorporation or reduction of molecular oxygen, NAD(P)H as one donor, and incorporation of one atom of oxygen
LOC115724782	greenyellow	0.756986	0.696462	0.890773	0.810677	1.11205	2.13716	0.810158	1.58877		At3g26720	Alpha-mannosidase At3g26720	GeneID:115724782	GO:0009505,GO:0005774,GO:0005773,GO:0004559,GO:0030246,GO:0046872,GO:0006013,GO:0006517	plant-type cell wall|vacuolar membrane|vacuole|alpha-mannosidase activity|carbohydrate binding|metal ion binding|mannose metabolic process|protein deglycosylation	ko00511	Other glycan degradation
LOC115724806	greenyellow	0.830977	1.16193	0.842397	0.736069	1.22432	2.31807	1.45605	1.93782				GeneID:115724806
LOC115725287	greenyellow	2.44226	2.72308	2.63256	2.73969	2.45716	4.81351	2.80692	3.99003				GeneID:115725287
LOC115725611	greenyellow	3.38012	2.69106	3.51239	3.30247	2.82403	4.2152	3.66397	4.25752	SAMDC		S-adenosylmethionine decarboxylase beta chain	GeneID:115725611	GO:0005829,GO:0004014,GO:0006557,GO:0008295,GO:0006597	cytosol|adenosylmethionine decarboxylase activity|S-adenosylmethioninamine biosynthetic process|spermidine biosynthetic process|spermine biosynthetic process	ko00270,ko00330	Cysteine and methionine metabolism|Arginine and proline metabolism
LOC115725613	greenyellow	0.378946	0.257989	1.08681	0.925686	0.508849	1.72781	0.565019	1.48202	TED7		Protein TRACHEARY ELEMENT DIFFERENTIATION-RELATED 7A	GeneID:115725613
LOC115725708	greenyellow	0.0478063	0.192514	0	0	0	3.00951	0.0521239	1.72988				GeneID:115725708
LOC115725752	greenyellow	0.0684892	0.0245556	0.0519525	0.745956	0.671944	1.34887	0.277812	1.06941	CYP71D11		Cytochrome P450 71D11	GeneID:115725752	GO:0020037,GO:0005506,GO:0004497,GO:0016705	heme binding|iron ion binding|monooxygenase activity|oxidoreductase activity, acting on paired donors, with incorporation or reduction of molecular oxygen

## Sheet: grey60_484
Supplementary Table S6: Genes of module (XLS).
grey60 module
Gene id	Modules	Cs4XF1	Cs4XF2	Cs4XF3	Cs4XF4	Cs2XF1	Cs2XF2	Cs2XF3	Cs2XF4	gene_symbol	gene_homologs	description	gene_Dbxref	GO_id	GO_term	pathway	pathway_description
LOC115694676	grey60	6.42991	6.30824	5.96218	6.66954	8.02371	7.87822	6.7578	7.26133	FBA5	At4g26530	Fructose-bisphosphate aldolase 5, cytosolic	GeneID:115694676	GO:0009507,GO:0005829,GO:0004332,GO:0006094,GO:0006096	chloroplast|cytosol|fructose-bisphosphate aldolase activity|gluconeogenesis|glycolytic process	ko00010,ko00030,ko00051,ko00710	Glycolysis / Gluconeogenesis|Pentose phosphate pathway|Fructose and mannose metabolism|Carbon fixation in photosynthetic organisms
LOC115694757	grey60	0	0	0.00769169	0	3.64291	0	4.80052	3.09488		At4g27190	Disease resistance protein At4g27190	GeneID:115694757
LOC115694842	grey60	0.389363	0.820272	1.03665	0.575608	1.9169	2.26335	2.53423	2.77269				GeneID:115694842
LOC115695459	grey60	0.703236	0.251091	1.0818	0	1.22308	1.28983	1.36054	0.612549	SAUR15	At4g38850	Auxin-responsive protein SAUR15	GeneID:115695459	GO:0005886,GO:0009734,GO:0007275,GO:0040008,GO:0009733	plasma membrane|auxin-activated signaling pathway|multicellular organism development|regulation of growth|response to auxin	ko04075	Plant hormone signal transduction
LOC115695516	grey60	0	0	0	0.0338214	2.72263	0	2.98706	2.19632		At3g55350	Protein ALP1-like	GeneID:115695516	GO:0005634,GO:0046872,GO:0004518	nucleus|metal ion binding|nuclease activity
LOC115695627	grey60	6.35172	5.78997	5.32898	6.21073	6.9204	7.14132	6.85071	6.47292	TIL	At5g58070	Temperature-induced lipocalin-1	GeneID:115695627	GO:0009941,GO:0031969,GO:0005737,GO:0009898,GO:0005783,GO:0005794,GO:0005739,GO:0005886,GO:0009506,GO:0005774,GO:0005773,GO:0045735,GO:0005215,GO:0030644,GO:0006883,GO:0010286,GO:0042538,GO:0006629,GO:1902884,GO:1901002,GO:0009409,GO:0009735,GO:0050826,GO:0009408,GO:0009644,GO:0009416,GO:1901562,GO:0009414,GO:0010431	chloroplast envelope|chloroplast membrane|cytoplasm|cytoplasmic side of plasma membrane|endoplasmic reticulum|Golgi apparatus|mitochondrion|plasma membrane|plasmodesma|vacuolar membrane|vacuole|nutrient reservoir activity|transporter activity|cellular chloride ion homeostasis|cellular sodium ion homeostasis|heat acclimation|hyperosmotic salinity response|lipid metabolic process|positive regulatio…
LOC115695676	grey60	0	0	0	0	1.82379	1.12354	1.0405	1.79129				GeneID:115695676
LOC115695753	grey60	4.75063	5.12469	4.08991	5.7107	7.59395	5.90458	7.02628	6.0617	MTL2		Probable caffeine synthase MTL2	GeneID:115695753	GO:0046872,GO:0008168,GO:0009820	metal ion binding|methyltransferase activity|alkaloid metabolic process
LOC115695794	grey60	5.19513	4.49462	4.89452	5.1259	5.87938	5.94232	6.02716	5.23098				GeneID:115695794
LOC115695882	grey60	0.618586	0.476225	0.625737	1.15515	2.67945	4.2273	3.68858	4.07791	BURP17	Os11g0170900	BURP domain-containing protein 17	GeneID:115695882
LOC115695887	grey60	0	0	0	0	2.57265	0	1.66641	2.13127				GeneID:115695887
LOC115695890	grey60	1.72758	2.24779	0.966027	1.85977	2.52396	2.88444	3.04568	2.46119	AAG		Agglutinin-1 chain B	GeneID:115695890	GO:0030246,GO:0030598,GO:0090729,GO:0006952,GO:0007157,GO:0017148,GO:0044533	carbohydrate binding|rRNA N-glycosylase activity|toxin activity|defense response|heterophilic cell-cell adhesion via plasma membrane cell adhesion molecules|negative regulation of translation|positive regulation of apoptotic process in other organism
LOC115695902	grey60	0.386212	0.194729	0.158016	0.662605	3.37343	5.31603	4.31069	5.45579				GeneID:115695902
LOC115695905	grey60	2.35491	1.63863	2.59267	2.82356	6.2351	7.95318	7.15339	7.88266				GeneID:115695905
LOC115696233	grey60	0.5201	0.21695	0.265667	0.0683114	1.77575	1.7565	1.52004	1.05562	EIF4A3A	Os01g0639100	Eukaryotic initiation factor 4A-III homolog A	GeneID:115696233	GO:0005737,GO:0005634,GO:0005524,GO:0004386,GO:0003723,GO:0006397,GO:0051028,GO:0000184,GO:0006417,GO:0008380	cytoplasm|nucleus|ATP binding|helicase activity|RNA binding|mRNA processing|mRNA transport|nuclear-transcribed mRNA catabolic process, nonsense-mediated decay|regulation of translation|RNA splicing	ko03013,ko03015,ko03040	RNA transport|mRNA surveillance pathway|Spliceosome
LOC115696428	grey60	1.69006	0.96806	1.34018	1.53608	2.13436	2.9378	2.53944	2.22665		At2g40280	Probable methyltransferase PMT23	GeneID:115696428	GO:0005768,GO:0005794,GO:0000139,GO:0016021,GO:0005802,GO:0008757,GO:0052546	endosome|Golgi apparatus|Golgi membrane|integral component of membrane|trans-Golgi network|S-adenosylmethionine-dependent methyltransferase activity|cell wall pectin metabolic process
LOC115696674	grey60	0.673407	0.570151	0.208255	0.476154	1.91612	1.65891	0.999484	1.88642		Os03g0733400	Zinc finger BED domain-containing protein RICESLEEPER 2	GeneID:115696674	GO:0005634,GO:0003677,GO:0046872,GO:0046983,GO:0009791	nucleus|DNA binding|metal ion binding|protein dimerization activity|post-embryonic development
LOC115696723	grey60	5.56389	5.7927	4.58355	4.55079	6.14919	4.42199	5.45569	5.53886		At2g39020	Probable acetyltransferase NATA1-like	GeneID:115696723	GO:0009507,GO:0016746,GO:0006591	chloroplast|transferase activity, transferring acyl groups|ornithine metabolic process
LOC115696853	grey60	0.543477	1.41638	0.332014	0.805813	1.45648	0.930716	1.84037	0.925156		At5g44380	Berberine bridge enzyme-like 24	GeneID:115696853	GO:0005618,GO:0005576,GO:0009506,GO:0071949,GO:0016491,GO:0006979	cell wall|extracellular region|plasmodesma|FAD binding|oxidoreductase activity|response to oxidative stress	ko00940	Phenylpropanoid biosynthesis
LOC115696872	grey60	4.90202	5.44557	5.24873	5.1753	7.09845	6.03822	7.28066	6.3594			Non-specific lipid-transfer protein 8	GeneID:115696872	GO:0008289,GO:0006869	lipid binding|lipid transport
LOC115696874	grey60	0.984416	0.232453	0.552667	0.692156	1.27263	1.34814	2.13281	1.6143	LECRK41	At2g37710	L-type lectin-domain containing receptor kinase IV.1	GeneID:115696874
LOC115696903	grey60	1.87973	1.0773	1.52868	1.01986	1.98822	2.09768	1.80531	2.55527	CYP716A44		Beta-amyrin 28-monooxygenase	GeneID:115696903	GO:0016021,GO:0020037,GO:0005506,GO:0016709,GO:0016135	integral component of membrane|heme binding|iron ion binding|oxidoreductase activity,acting on paired donors, with incorporation or reduction of molecular oxygen, NAD(P)H as one donor, and incorporation of one atom of oxygen|saponin biosynthetic process
LOC115697023	grey60	1.53989	2.45008	1.35382	2.18227	3.25187	3.88037	3.31649	3.04944				GeneID:115697023
LOC115697188	grey60	4.91517	4.68303	4.73268	4.38069	5.31135	5.57251	6.05646	5.25531		At5g06060	Tropinone reductase homolog At5g06060	GeneID:115697188	GO:0005829,GO:0016491	cytosol|oxidoreductase activity	ko00960	Tropane, piperidine and pyridine alkaloid biosynthesis
LOC115697505	grey60	4.73259	4.19641	3.80343	3.92987	5.56212	4.50327	5.53501	4.05474		At3g10130	Heme-binding-like protein At3g10130, chloroplastic	GeneID:115697505	GO:0009507,GO:0009535,GO:0010287,GO:0020037	chloroplast|chloroplast thylakoid membrane|plastoglobule|heme binding
LOC115697584	grey60	3.69037	4.51679	3.0173	3.24183	5.54821	4.08441	3.18177	2.96676	SWEET2A	Sb03g024250	Bidirectional sugar transporter SWEET2a	GeneID:115697584	GO:0016021,GO:0005886,GO:0008643	integral component of membrane|plasma membrane|carbohydrate transport
LOC115697596	grey60	0	0	0	0	1.62576	0	2.93636	1.78661	ERD4	At1g30360	CSC1-like protein ERD4	GeneID:115697596	GO:0009507,GO:0009941,GO:0016021,GO:0016020,GO:0005886,GO:0009506,GO:0005774,GO:0005773,GO:0005227	chloroplast|chloroplast envelope|integral component of membrane|membrane|plasma membrane|plasmodesma|vacuolar membrane|vacuole|calcium activated cation channel activity
LOC115697814	grey60	5.67847	6.01064	5.6036	6.51618	7.29396	7.34883	6.95198	6.80326			Non-specific lipid-transfer protein	GeneID:115697814	GO:0008289,GO:0006869	lipid binding|lipid transport
LOC115697843	grey60	4.57379	3.68109	4.0559	4.51619	5.16955	5.86966	5.45527	5.28396	CET1		CEN-like protein 1	GeneID:115697843	GO:0005737	cytoplasm
LOC115697904	grey60	0.0781721	0	0	0.0743277	0.967449	0.822535	1.22503	1.06628				GeneID:115697904
LOC115698010	grey60	1.47321	0.956674	1.11223	1.70779	2.21763	1.08228	2.23194	1.97002	HSP26-A		Probable glutathione S-transferase	GeneID:115698010	GO:0005737,GO:0004364,GO:0006749,GO:0009737,GO:0009733,GO:0009735,GO:0009739,GO:0009408,GO:0010038	cytoplasm|glutathione transferase activity|glutathione metabolic process|response to abscisic acid|response to auxin|response to cytokinin|response to gibberellin|response to heat|response to metal ion	ko00480	Glutathione metabolism
LOC115698071	grey60	0.544745	0.371646	0.52055	0.629521	1.23552	1.88261	1.35018	1.40929	FAO4A	At4g19380	Long-chain-alcohol oxidase FAO4A	GeneID:115698071	GO:0016021,GO:0050660,GO:0046577	integral component of membrane|flavin adenine dinucleotide binding|long-chain-alcohol oxidase activity
LOC115698081	grey60	2.38601	2.06157	2.48635	2.43382	3.42774	3.73337	3.19865	3.34673	PBL8	At5g01020	Probable serine/threonine-protein kinase PBL8	GeneID:115698081
LOC115698103	grey60	1.35073	1.51771	1.5305	1.33845	2.6365	2.67449	1.96259	2.35074				GeneID:115698103
LOC115698108	grey60	6.30427	6.37684	6.02948	6.28042	7.1159	7.3862	7.18279	6.67167	FBP		Fructose-1,6-bisphosphatase, chloroplastic	GeneID:115698108	GO:0009570,GO:0042132,GO:0046872,GO:0019253	chloroplast stroma|fructose 1,6-bisphosphate 1-phosphatase activity|metal ion binding|reductive pentose-phosphate cycle	ko00010,ko00030,ko00051,ko00710	Glycolysis / Gluconeogenesis|Pentose phosphate pathway|Fructose and mannose metabolism|Carbon fixation in photosynthetic organisms
LOC115698612	grey60	3.57899	2.9927	3.54138	3.30699	4.18493	4.78962	3.78547	4.0856	PPT2	At3g01550	Phosphoenolpyruvate/phosphate translocator 2, chloroplastic	GeneID:115698612	GO:0031969,GO:0016021,GO:0015121,GO:0015120,GO:0071917,GO:0015714,GO:0015713	chloroplast membrane|integral component of membrane|phosphoenolpyruvate:phosphate antiporter activity|phosphoglycerate transmembrane transporter activity|triose-phosphate transmembrane transporter activity|phosphoenolpyruvate transport|phosphoglycerate transmembrane transport
LOC115698660	grey60	3.95848	3.73752	4.50222	4.40086	5.3101	4.04344	5.22577	4.30831				GeneID:115698660
LOC115698677	grey60	1.75995	1.58161	1.3475	2.23448	3.44795	3.31697	2.47385	2.79196	CSLH1	Os10g0341700	Cellulose synthase-like protein H1	GeneID:115698677	GO:0005794,GO:0000139,GO:0016021,GO:0005886,GO:0005802,GO:0016760,GO:0016759,GO:0071555,GO:0030244,GO:0009833	Golgi apparatus|Golgi membrane|integral component of membrane|plasma membrane|trans-Golgi network|cellulose synthase (UDP-forming) activity|cellulose synthase activity|cell wall organization|cellulose biosynthetic process|plant-type primary cell wall biogenesis
LOC115698702	grey60	2.51835	2.30115	2.51159	2.88852	3.96671	3.33688	3.43092	4.021	D14L	Os11g0384789	Probable esterase D14L	GeneID:115698702	GO:0005737,GO:0005634,GO:0016787,GO:0036377,GO:0080167	cytoplasm|nucleus|hydrolase activity|arbuscular mycorrhizal association|response to karrikin
LOC115698722	grey60	2.21676	2.01239	2.65988	2.54847	2.99201	3.15812	3.6852	3.47111	OFP6	At3g52525	Transcription repressor OFP6	GeneID:115698722	GO:0005634,GO:0045892	nucleus|negative regulation of transcription, DNA-templated
LOC115698779	grey60	0	0.0257025	0	0	1.82494	1.74081	1.84568	2.33185	SSL10	At3g57030	Protein STRICTOSIDINE SYNTHASE-LIKE 10	GeneID:115698779	GO:0005783,GO:0016020,GO:0009505,GO:0005886,GO:0009506,GO:0005773,GO:0009058	endoplasmic reticulum|membrane|plant-type cell wall|plasma membrane|plasmodesma|vacuole|biosynthetic process
LOC115698783	grey60	3.56068	2.76389	2.60964	2.50413	4.48528	5.0872	4.45278	2.8659	FAD4	At4g27030	Fatty acid desaturase 4, chloroplastic	GeneID:115698783	GO:0009507,GO:0031969,GO:0016021,GO:0052637,GO:0046471,GO:0080167,GO:0006636	chloroplast|chloroplast membrane|integral component of membrane|delta 3-trans-hexadecenoic acid phosphatidylglycerol desaturase activity|phosphatidylglycerol metabolic process|response to karrikin|unsaturated fatty acid biosynthetic process
LOC115698803	grey60	0.185718	0.196007	0.240402	0.176899	1.36262	0.585336	1.1211	1.2186	PHO1	At3g23430	Phosphate transporter PHO1	GeneID:115698803	GO:0005789,GO:0005794,GO:0000139,GO:0016021,GO:0005886,GO:0005802,GO:0000822,GO:0015114,GO:0016036,GO:0048016,GO:0006817,GO:0006799	endoplasmic reticulum membrane|Golgi apparatus|Golgi membrane|integral component of membrane|plasma membrane|trans-Golgi network|inositol hexakisphosphate binding|phosphate ion transmembrane transporter activity|cellular response to phosphate starvation|inositol phosphate-mediated signaling|phosphate ion transport|polyphosphate biosynthetic process
LOC115698978	grey60	1.16424	1.30106	1.22667	0.514557	2.29406	2.39239	2.42596	1.39782	BZIP43	At5g38800	Basic leucine zipper 43	GeneID:115698978	GO:0005634,GO:0003677,GO:0003700	nucleus|DNA binding|DNA-binding transcription factor activity
LOC115699169	grey60	0	0.0401797	0	0	1.7951	2.32692	2.89417	2.06888				GeneID:115699169
LOC115699318	grey60	0.729995	1.09336	1.34828	0.919299	1.80168	2.20706	2.41985	1.88179	APF2	At1g01300	Aspartyl protease family protein 2	GeneID:115699318	GO:0016020,GO:0009505,GO:0004190,GO:0030163,GO:0006508,GO:0080167	membrane|plant-type cell wall|aspartic-type endopeptidase activity|protein catabolic process|proteolysis|response to karrikin
LOC115699330	grey60	0	0	0	0	1.37487	1.2755	1.66956	1.22817				GeneID:115699330
LOC115699396	grey60	4.6768	4.2802	4.80246	3.55718	6.80067	6.05844	5.97917	6.5505	EP3	At3g54420	Endochitinase EP3	GeneID:115699396	GO:0005618,GO:0008061,GO:0004568,GO:0016998,GO:0006032,GO:0006952,GO:0000272,GO:0009617,GO:0009611,GO:0010262	cell wall|chitin binding|chitinase activity|cell wall macromolecule catabolic process|chitin catabolic process|defense response|polysaccharide catabolic process|response to bacterium|response to wounding|somatic embryogenesis	ko00520	Amino sugar and nucleotide sugar metabolism
LOC115699425	grey60	5.01554	4.33133	4.68515	4.08702	5.10211	4.74532	5.38441	5.64988				GeneID:115699425
LOC115699531	grey60	0.850313	0.278124	0.0460567	1.04397	1.47054	1.31276	1.11005	1.23402	PMADS2		Floral homeotic protein PMADS 2	GeneID:115699531	GO:0005634,GO:0003700,GO:0046983,GO:0000977,GO:0007275,GO:0045944	nucleus|DNA-binding transcription factor activity|protein dimerization activity|RNA polymerase II regulatory region sequence-specific DNA binding|multicellular organism development|positive regulation of transcription by RNA polymerase II
LOC115699674	grey60	1.94448	1.8286	2.1084	1.96981	2.74888	3.15712	3.20618	2.9855	EDM2	At5g55390	Protein ENHANCED DOWNY MILDEW 2	GeneID:115699674	GO:0005634,GO:0003700,GO:0046872,GO:0043565,GO:0050832,GO:0070829,GO:0090436,GO:0031937,GO:0009911,GO:0061087,GO:1900111,GO:0044030,GO:2000024,GO:1900363,GO:0006355,GO:0007165,GO:0010228	nucleus|DNA-binding transcription factor activity|metal ion binding|sequence-specific DNA binding|defense response to fungus|heterochromatin maintenance|leaf pavement cell development|positive regulation of chromatin silencing|positive regulation of flower development|positive regulation of histone H3-K27 methylation|positive regulation of histone H3-K9 dimethylation|regulation of DNA methylation…
LOC115699706	grey60	1.63132	1.41868	2.05649	1.08954	3.14098	3.0577	3.43274	3.25435	PNS1		Protein PNS1	GeneID:115699706	GO:0016021,GO:0005886	integral component of membrane|plasma membrane
LOC115699719	grey60	3.25426	3.051	2.93318	3.11144	4.11062	4.35336	4.21547	3.07425	CYCU1-1	At3g21870	Cyclin-U1-1	GeneID:115699719	GO:0019901,GO:0007049,GO:0051301,GO:0000079	protein kinase binding|cell cycle|cell division|regulation of cyclin-dependent protein serine/threonine kinase activity
LOC115699774	grey60	0.0275922	0	0	0	2.06374	1.18012	1.66529	2.17297				GeneID:115699774
LOC115699816	grey60	0	0	0	0	1.98534	2.68575	2.02532	2.23333	bVPE	At1g62710	Vacuolar-processing enzyme beta-isozyme	GeneID:115699816	GO:0000326,GO:0004197,GO:0051603,GO:0006624	protein storage vacuole|cysteine-type endopeptidase activity|proteolysis involved in cellular protein catabolic process|vacuolar protein processing
LOC115700026	grey60	0	0	0	0	1.28208	0	0.83753	0.67469				GeneID:115700026
LOC115700296	grey60	2.13754	2.51061	2.29004	2.34014	3.59538	2.20042	3.7207	3.13655	PMAT1	At5g39050	Phenolic glucoside malonyltransferase 1	GeneID:115700296	GO:0005829,GO:0050736,GO:0009636	cytosol|O-malonyltransferase activity|response to toxic substance
LOC115700326	grey60	4.40084	4.07309	3.13529	2.77631	4.89332	2.79834	4.56189	4.48834				GeneID:115700326
LOC115700526	grey60	4.27522	3.93042	4.59309	4.44556	6.41094	5.88336	6.58888	6.45751	EXPA23	At5g39280	Expansin-A23	GeneID:115700526
LOC115700571	grey60	1.69273	1.3902	1.85903	1.29469	2.55615	1.78399	2.85059	2.23175	PYR4	At4g22930	Dihydroorotase, mitochondrial	GeneID:115700571	GO:0009507,GO:0005739,GO:0004151,GO:0046872,GO:0006207,GO:0044205,GO:0006221	chloroplast|mitochondrion|dihydroorotase activity|metal ion binding|'de novo' pyrimidine nucleobase biosynthetic process|'de novo' UMP biosynthetic process|pyrimidine nucleotide biosynthetic process	ko00240	Pyrimidine metabolism
LOC115700649	grey60	2.27701	1.80326	1.3961	1.0814	3.17089	2.94452	2.83303	2.89841				GeneID:115700649
LOC115700682	grey60	1.5056	1.06942	1.4354	1.74837	2.19582	2.12222	3.03203	2.27648				GeneID:115700682
LOC115700717	grey60	3.81544	3.45742	3.48218	3.98237	5.19662	5.02578	4.44627	3.96924		At5g52780	Uncharacterized protein PAM68-like	GeneID:115700717	GO:0009507,GO:0009535,GO:0016021	chloroplast|chloroplast thylakoid membrane|integral component of membrane
LOC115700740	grey60	1.70834	1.93479	1.40045	1.46143	4.50396	4.40385	3.83805	5.77896				GeneID:115700740
LOC115700781	grey60	0.680588	1.42013	0.595928	1.23842	1.49059	1.14622	2.23343	1.75224	HD3A	Os06g0157700	Protein HEADING DATE 3A	GeneID:115700781	GO:0005737,GO:0005634,GO:0008429,GO:0030154,GO:0009908,GO:0010229,GO:0009909,GO:0048510,GO:0048572,GO:0048575	cytoplasm|nucleus|phosphatidylethanolamine binding|cell differentiation|flower development|inflorescence development|regulation of flower development|regulation of timing of transition from vegetative to reproductive phase|short-day photoperiodism|short-day photoperiodism, flowering	ko04712	Circadian rhythm - plant
LOC115700797	grey60	2.36381	2.2112	2.08327	1.76218	3.0138	3.78996	2.7737	1.99279				GeneID:115700797
LOC115700908	grey60	0.35308	0.60374	0.636899	0.469692	3.79013	4.73138	3.64988	4.34039				GeneID:115700908
LOC115700935	grey60	0.166565	0.530533	0.635797	0.763197	2.22646	2.35114	2.63502	2.59278	VRN1	At3g18990	B3 domain-containing transcription factor VRN1	GeneID:115700935	GO:0005654,GO:0003677,GO:0043565,GO:0009909,GO:0010048	nucleoplasm|DNA binding|sequence-specific DNA binding|regulation of flower development|vernalization response
LOC115701058	grey60	1.47308	1.49906	2.45597	2.3579	3.63013	3.57395	3.11499	3.76957		At2g42690	Phospholipase A1-IIdelta	GeneID:115701058	GO:0009507,GO:0005737,GO:0008970,GO:0071493,GO:0016042,GO:0009650	chloroplast|cytoplasm|phospholipase A1 activity|cellular response to UV-B|lipid catabolic process|UV protection
LOC115701116	grey60	0.576658	0.832495	0.482405	0.396838	1.65445	1.98815	2.44518	1.58496	MRS2-11	At5g22830	Magnesium transporter MRS2-11, chloroplastic	GeneID:115701116	GO:0009507,GO:0009941,GO:0031969,GO:0016021,GO:0015095,GO:0010960,GO:1903830,GO:0015693,GO:0010117,GO:0010027	chloroplast|chloroplast envelope|chloroplast membrane|integral component of membrane|magnesium ion transmembrane transporter activity|magnesium ion homeostasis|magnesium ion transmembrane transport|magnesium ion transport|photoprotection|thylakoid membrane organization
LOC115701215	grey60	3.98518	4.22491	3.48344	4.78913	5.34537	6.00154	5.01817	5.19154	NIP5-1	At4g10380	Probable aquaporin NIP5-1	GeneID:115701215	GO:0016021,GO:0016328,GO:0005886,GO:0046715,GO:0015105,GO:0015250,GO:0015700,GO:0046713,GO:0080029,GO:0046685,GO:0010036	integral component of membrane|lateral plasma membrane|plasma membrane|active borate transmembrane transporter activity|arsenite transmembrane transporter activity|water channel activity|arsenite transport|borate transport|cellular response to boron-containing substance levels|response to arsenic-containing substance|response to boron-containing substance
LOC115701491	grey60	0.176456	0.119202	1.42901	0.787262	2.21607	1.54927	1.36766	2.05225	CYP71D9		Cytochrome P450 71D9	GeneID:115701491	GO:0016020,GO:0020037,GO:0005506,GO:0016709	membrane|heme binding|iron ion binding|oxidoreductase activity,acting on paired donors, with incorporation or reduction of molecular oxygen, NAD(P)H as one donor, and incorporation of one atom of oxygen
LOC115702093	grey60	3.93312	3.5227	3.65139	3.51688	4.81842	4.72474	4.68395	4.40122	CYP704C1		Cytochrome P450 704C1	GeneID:115702093	GO:0016021,GO:0020037,GO:0005506,GO:0004497,GO:0016705	integral component of membrane|heme binding|iron ion binding|monooxygenase activity|oxidoreductase activity, acting on paired donors, with incorporation or reduction of molecular oxygen
LOC115702125	grey60	4.03784	3.52243	3.91575	4.22376	4.93333	4.82513	5.12122	5.51578			Pectinesterase PPE8B	GeneID:115702125	GO:0005618,GO:0005576,GO:0045330,GO:0004857,GO:0030599,GO:0042545,GO:0045490	cell wall|extracellular region|aspartyl esterase activity|enzyme inhibitor activity|pectinesterase activity|cell wall modification|pectin catabolic process	ko00040	Pentose and glucuronate interconversions
LOC115702322	grey60	6.57905	6.23543	6.53313	6.54134	7.58732	8.32991	8.12116	7.34017	PSBS		Photosystem II 22 kDa protein, chloroplastic	GeneID:115702322	GO:0009535,GO:0016021,GO:0009523,GO:0042802,GO:0051219,GO:0015979	chloroplast thylakoid membrane|integral component of membrane|photosystem II|identical protein binding|phosphoprotein binding|photosynthesis	ko00195	Photosynthesis
LOC115702330	grey60	2.42074	2.45649	2.73191	2.58261	3.60007	3.28547	3.76433	3.15651				GeneID:115702330
LOC115702338	grey60	1.36091	1.7113	1.43883	1.76281	3.62548	1.45398	2.75048	2.93716	BHLH80	At1g35460	Transcription factor bHLH80	GeneID:115702338	GO:0005634,GO:0003677,GO:0001228,GO:0003700,GO:0046983,GO:0042335,GO:0006355	nucleus|DNA binding|DNA-binding transcription activator activity, RNA polymerase II-specific|DNA-binding transcription factor activity|protein dimerization activity|cuticle development|regulation of transcription, DNA-templated
LOC115702361	grey60	7.15496	6.97321	7.105	7.4483	7.8986	8.38576	8.1617	7.66434	ATPF2		ATP synthase subunit b', chloroplastic	GeneID:115702361	GO:0009535,GO:0016021,GO:0045263,GO:0005524,GO:0015078,GO:0015986	chloroplast thylakoid membrane|integral component of membrane|proton-transporting ATP synthase complex, coupling factor F(o)|ATP binding|proton transmembrane transporter activity|ATP synthesis coupled proton transport	ko00190,ko00195	Oxidative phosphorylation|Photosynthesis
LOC115702382	grey60	4.74436	3.99346	4.65799	4.62442	5.62641	5.2248	5.07775	5.7292				GeneID:115702382
LOC115702383	grey60	0.40202	0.256423	0.698856	0.120595	2.12463	2.31041	2.53915	1.64144	GRXS1	At1g03020	Monothiol glutaredoxin-S1	GeneID:115702383	GO:0005737,GO:0051537,GO:0009055,GO:0046872,GO:0015035,GO:0045454	cytoplasm|2 iron, 2 sulfur cluster binding|electron transfer activity|metal ion binding|protein disulfide oxidoreductase activity|cell redox homeostasis
LOC115702445	grey60	1.08259	0.337	0.988094	0.614206	3.31482	1.55021	2.88252	3.31297	SWEET9	At2g39060	Bidirectional sugar transporter SWEET9	GeneID:115702445	GO:0030659,GO:0005887,GO:0005886,GO:0032588,GO:0012506,GO:0008515,GO:0051119,GO:0071836	cytoplasmic vesicle membrane|integral component of plasma membrane|plasma membrane|trans-Golgi network membrane|vesicle membrane|sucrose transmembrane transporter activity|sugar transmembrane transporter activity|nectar secretion
LOC115702569	grey60	4.70629	3.80532	4.65619	4.89954	5.49514	5.62108	5.43387	5.43154	FMO1	At1g19250	Probable flavin-containing monooxygenase 1	GeneID:115702569	GO:0050660,GO:0004497,GO:0004499,GO:0050661,GO:0031543,GO:0062047,GO:0071456,GO:0009870,GO:0010204,GO:0042742,GO:0050832,GO:0062034,GO:0009626,GO:0051707,GO:0009627	flavin adenine dinucleotide binding|monooxygenase activity|N,N-dimethylaniline monooxygenase activity|NADP binding|peptidyl-proline dioxygenase activity|pipecolic acid N-hydroxylase|cellular response to hypoxia|defense response signaling pathway, resistance gene-dependent|defense response signaling pathway, resistance gene-independent|defense response to bacterium|defense response to fungus|L-pip…
LOC115702591	grey60	0.162465	0	0.0941322	0.260714	1.78126	0.970639	1.07475	1.14728	AAE2	At2g17650	Probable acyl-activating enzyme 2	GeneID:115702591	GO:0016874,GO:0006631	ligase activity|fatty acid metabolic process
LOC115702629	grey60	0.0224132	0.114932	0.0746933	0.0833398	2.0032	1.94986	1.67282	2.13225	PSAT2	At2g17630	Phosphoserine aminotransferase 2, chloroplastic	GeneID:115702629	GO:0009507,GO:0009570,GO:0009534,GO:0004648,GO:0006564,GO:0046686	chloroplast|chloroplast stroma|chloroplast thylakoid|O-phospho-L-serine:2-oxoglutarate aminotransferase activity|L-serine biosynthetic process|response to cadmium ion	ko00260,ko00270,ko00750	Glycine, serine and threonine metabolism|Cysteine and methionine metabolism|Vitamin B6 metabolism
LOC115702632	grey60	0.0878449	0.122565	0	0.028387	1.1037	1.2751	1.62269	1.39188	SSL6	At3g51440	Protein STRICTOSIDINE SYNTHASE-LIKE 6	GeneID:115702632	GO:0005783,GO:0016020,GO:0005773,GO:0009058,GO:0009723,GO:0009620,GO:0009753,GO:0009751,GO:0009615,GO:0009611	endoplasmic reticulum|membrane|vacuole|biosynthetic process|response to ethylene|response to fungus|response to jasmonic acid|response to salicylic acid|response to virus|response to wounding
LOC115702681	grey60	0.0871589	0.0696676	0.0982197	0.122608	1.78981	0.936048	0.763012	1.56454	CYP81Q32		Cytochrome P450 81Q32	GeneID:115702681
LOC115702696	grey60	0.164314	0.241896	0.159596	0.135118	2.39453	3.31606	3.50222	3.13832	STY17	At4g35780	Serine/threonine-protein kinase STY17	GeneID:115702696	GO:0005829,GO:0005524,GO:0004674,GO:0004712,GO:0009658	cytosol|ATP binding|protein serine/threonine kinase activity|protein serine/threonine/tyrosine kinase activity|chloroplast organization
LOC115702708	grey60	0.631973	0.506417	0.428109	0.367339	4.49527	6.17739	6.19037	5.57447	SCE1	At3g57870	SUMO-conjugating enzyme SCE1	GeneID:115702708	GO:0005634,GO:0005524,GO:0019900,GO:0061656,GO:0019789,GO:0009793,GO:0016925,GO:0009737	nucleus|ATP binding|kinase binding|SUMO conjugating enzyme activity|SUMO transferase activity|embryo development ending in seed dormancy|protein sumoylation|response to abscisic acid	ko03013,ko04120	RNA transport|Ubiquitin mediated proteolysis
LOC115702710	grey60	0	0	0.0543987	0.0607451	2.28851	3.20844	2.73874	3.04871		At5g67200	Probable inactive receptor kinase At5g67200	GeneID:115702710
LOC115702711	grey60	2.63068	2.78242	2.82088	2.80909	3.99738	3.95364	3.87931	3.79675	KIN4A		Kinesin-like protein KIN-4A	GeneID:115702711	GO:0055028,GO:0005737,GO:0005524,GO:0008017,GO:0003777,GO:0071555,GO:0007018	cortical microtubule|cytoplasm|ATP binding|microtubule binding|microtubule motor activity|cell wall organization|microtubule-based movement
LOC115702727	grey60	0.0696016	0.14367	0.223727	0.129436	4.67458	3.69678	3.64962	4.12609	RER1A	At4g39220	Protein RER1A	GeneID:115702727	GO:0005783,GO:0005794,GO:0030173,GO:0006621,GO:0006890	endoplasmic reticulum|Golgi apparatus|integral component of Golgi membrane|protein retention in ER lumen|retrograde vesicle-mediated transport, Golgi to ER
LOC115702733	grey60	0.0284558	0	0	0	1.65165	1.62526	1.20483	1.55455	EB1C	At5g67270	Microtubule-associated protein RP/EB family member 1C	GeneID:115702733	GO:0005618,GO:0005881,GO:0005874,GO:0005815,GO:0035371,GO:0005730,GO:0005634,GO:0009524,GO:0005819,GO:0051233,GO:0008017,GO:0051010,GO:0051301,GO:0030865,GO:0035372,GO:1904825,GO:0031110,GO:0051225,GO:0009652	cell wall|cytoplasmic microtubule|microtubule|microtubule organizing center|microtubule plus-end|nucleolus|nucleus|phragmoplast|spindle|spindle midzone|microtubule binding|microtubule plus-end binding|cell division|cortical cytoskeleton organization|protein localization to microtubule|protein localization to microtubule plus-end|regulation of microtubule polymerization or depolymerization|spindle…
LOC115702775	grey60	0	0	0.216823	0.133864	3.01757	1.95371	1.56943	2.25774	TLP1	At4g24180	Thaumatin-like protein 1	GeneID:115702775	GO:0006952,GO:0009617,GO:0009723	defense response|response to bacterium|response to ethylene
LOC115702780	grey60	5.60363	5.24773	5.46473	5.6916	6.84652	7.2034	6.97865	6.53997	PETH		Ferredoxin--NADP reductase, leaf-type isozyme, chloroplastic	GeneID:115702780	GO:0009570,GO:0009535,GO:0004324,GO:0015979	chloroplast stroma|chloroplast thylakoid membrane|ferredoxin-NADP+ reductase activity|photosynthesis	ko00195	Photosynthesis
LOC115702892	grey60	1.53854	1.65902	1.1745	1.29699	2.61946	1.46732	2.84454	2.33771	ZIM17		Mitochondrial protein import protein ZIM17	GeneID:115702892	GO:0005743,GO:0008270,GO:0015031	mitochondrial inner membrane|zinc ion binding|protein transport
LOC115703011	grey60	3.59274	2.56051	2.62812	2.08271	3.55874	3.65321	3.55202	2.53182	mug16		Protein GMH1 homolog	GeneID:115703011	GO:0005783,GO:0005789,GO:0000139,GO:0030173,GO:0051321	endoplasmic reticulum|endoplasmic reticulum membrane|Golgi membrane|integral component of Golgi membrane|meiotic cell cycle
LOC115703020	grey60	3.0467	2.15153	2.40118	2.70035	3.66212	2.59972	4.03645	2.60228				GeneID:115703020
LOC115703097	grey60	2.23485	1.8049	1.76918	2.12221	2.85153	3.13875	2.83325	2.58978	GRXC13	At2g47880	Glutaredoxin-C13	GeneID:115703097	GO:0005737,GO:0005634,GO:0009055,GO:0015035,GO:0045454,GO:0006995	cytoplasm|nucleus|electron transfer activity|protein disulfide oxidoreductase activity|cell redox homeostasis|cellular response to nitrogen starvation
LOC115703200	grey60	6.26616	6.34737	6.05612	5.98542	7.03495	7.20548	7.23139	6.64644				GeneID:115703200
LOC115703246	grey60	2.63817	2.97713	3.32339	2.89575	4.3039	4.02826	3.73684	4.09282	GASA9	At1g22690	Gibberellin-regulated protein 9	GeneID:115703246	GO:0005576,GO:0009740	extracellular region|gibberellic acid mediated signaling pathway
LOC115703561	grey60	1.1614	0.88639	0.737908	0.951692	2.33204	1.84252	1.35049	1.97853	CBSPPR1	At5g10690	Pentatricopeptide repeat-containing protein At5g10690	GeneID:115703561
LOC115703570	grey60	0.0943009	0.280543	0.106235	0	3.66745	4.10752	4.00423	3.67572	RPS15AE	At4g29430	40S ribosomal protein S15a-5	GeneID:115703570	GO:0022626,GO:0022627,GO:0005739,GO:0042788,GO:0005773,GO:0003735,GO:0006412	cytosolic ribosome|cytosolic small ribosomal subunit|mitochondrion|polysomal ribosome|vacuole|structural constituent of ribosome|translation	ko03010	Ribosome
LOC115703598	grey60	2.61947	2.41936	2.62991	2.48461	3.76681	3.61162	3.59674	3.77341	TYRAAT1	At5g34930	Arogenate dehydrogenase 1, chloroplastic	GeneID:115703598	GO:0009507,GO:0033730,GO:0008977,GO:0004665,GO:0006571	chloroplast|arogenate dehydrogenase (NADP+) activity|prephenate dehydrogenase (NAD+) activity|prephenate dehydrogenase (NADP+) activity|tyrosine biosynthetic process	ko00400	Phenylalanine, tyrosine and tryptophan biosynthesis
LOC115703605	grey60	0.181156	0.0987701	0.682956	0.289626	2.07517	1.27707	1.44181	1.79266	CICDH	At1g65930	Cytosolic isocitrate dehydrogenase [NADP]	GeneID:115703605	GO:0048046,GO:0009570,GO:0005829,GO:0005886,GO:0009506,GO:0005507,GO:0004450,GO:0000287,GO:0051287,GO:0042803,GO:0042742,GO:0006102,GO:0006739,GO:0046686,GO:0009651,GO:0010043,GO:0006099	apoplast|chloroplast stroma|cytosol|plasma membrane|plasmodesma|copper ion binding|isocitrate dehydrogenase (NADP+) activity|magnesium ion binding|NAD binding|protein homodimerization activity|defense response to bacterium|isocitrate metabolic process|NADP metabolic process|response to cadmium ion|response to salt stress|response to zinc ion|tricarboxylic acid cycle	ko00020,ko00480,ko04146	Citrate cycle (TCA cycle)|Glutathione metabolism|Peroxisome
LOC115703623	grey60	0.511291	0.725953	0.473042	0.746271	3.46526	4.41879	4.85056	4.43	WSD1	At5g37300	O-acyltransferase WSD1	GeneID:115703623	GO:0005783,GO:0005789,GO:0016021,GO:0005886,GO:0102966,GO:0004144,GO:0047196,GO:0103095,GO:0019432,GO:0010025	endoplasmic reticulum|endoplasmic reticulum membrane|integral component of membrane|plasma membrane|arachidoyl-CoA:1-dodecanol O-acyltransferase activity|diacylglycerol O-acyltransferase activity|long-chain-alcohol O-fatty-acyltransferase activity|wax ester synthase activity|triglyceride biosynthetic process|wax biosynthetic process
LOC115703643	grey60	0.947857	0.835042	1.13321	1.16412	2.35238	2.55825	2.14456	2.13856	AERO1	At1g72280	Endoplasmic reticulum oxidoreductin-1	GeneID:115703643	GO:0005783,GO:0005789,GO:0016671,GO:0003756,GO:0015035,GO:0034975	endoplasmic reticulum|endoplasmic reticulum membrane|oxidoreductase activity, acting on a sulfur group of donors, disulfide as acceptor|protein disulfide isomerase activity|protein disulfide oxidoreductase activity|protein folding in endoplasmic reticulum	ko04141	Protein processing in endoplasmic reticulum
LOC115703790	grey60	1.16767	0.933042	0.979018	0.877704	2.13856	1.89477	2.5462	2.40219	NGA2	At3g61970	B3 domain-containing transcription factor NGA2	GeneID:115703790	GO:0005634,GO:0003677,GO:0003700,GO:0009908,GO:0048366,GO:1901371	nucleus|DNA binding|DNA-binding transcription factor activity|flower development|leaf development|regulation of leaf morphogenesis
LOC115703792	grey60	4.6024	3.79364	4.09109	3.76426	5.69264	4.23959	4.95239	4.19619			Annexin-like protein RJ4	GeneID:115703792	GO:0005509,GO:0005544	calcium ion binding|calcium-dependent phospholipid binding
LOC115703822	grey60	2.99388	2.57476	2.7163	2.96264	3.92543	4.05195	3.46509	3.75609	UGT76F1	At3g55700	UDP-glycosyltransferase 76F1	GeneID:115703822	GO:0043231,GO:0080043,GO:0080044,GO:0008194	intracellular membrane-bounded organelle|quercetin 3-O-glucosyltransferase activity|quercetin 7-O-glucosyltransferase activity|UDP-glycosyltransferase activity
LOC115703872	grey60	1.87428	1.67299	1.56586	1.91217	3.39306	3.09835	2.43712	3.29871	CXE1		Carboxylesterase 1	GeneID:115703872	GO:0052689	carboxylic ester hydrolase activity
LOC115703899	grey60	0.54207	0.174819	0.0959795	0.365916	4.07845	2.80322	3.8292	3.69132	CLPP3	At1g66670	ATP-dependent Clp protease proteolytic subunit 3, chloroplastic	GeneID:115703899	GO:0009507,GO:0009941,GO:0009570,GO:0009534,GO:0009840,GO:0009532,GO:0004252	chloroplast|chloroplast envelope|chloroplast stroma|chloroplast thylakoid|chloroplastic endopeptidase Clp complex|plastid stroma|serine-type endopeptidase activity
LOC115703955	grey60	1.23123	1.05009	1.19907	1.83162	2.44152	2.35269	1.99942	1.98639	VPYL	MTR_1g089180	Protein VAPYRIN-LIKE	GeneID:115703955	GO:0005768,GO:0005794,GO:0000139,GO:0016021,GO:0005802,GO:0008757,GO:0052546	endosome|Golgi apparatus|Golgi membrane|integral component of membrane|trans-Golgi network|S-adenosylmethionine-dependent methyltransferase activity|cell wall pectin metabolic process
LOC115704018	grey60	0.109793	0.0783905	0.162561	0.170104	3.54887	3.72108	3.78742	3.4486	SOD		Superoxide dismutase [Mn], mitochondrial	GeneID:115704018	GO:0005759,GO:0046872,GO:0004784,GO:0019430	mitochondrial matrix|metal ion binding|superoxide dismutase activity|removal of superoxide radicals	ko04146	Peroxisome
LOC115704035	grey60	0.201997	0.110494	0.375773	0.27984	2.88828	3.07606	2.95783	2.98233	THO6	At2g19430	THO complex subunit 6	GeneID:115704035	GO:0080008,GO:0005634,GO:0000347,GO:0003723,GO:0009738,GO:0031047,GO:0006397,GO:0051028,GO:0009788,GO:0010267,GO:0016567,GO:0008380	Cul4-RING E3 ubiquitin ligase complex|nucleus|THO complex|RNA binding|abscisic acid-activated signaling pathway|gene silencing by RNA|mRNA processing|mRNA transport|negative regulation of abscisic acid-activated signaling pathway|production of ta-siRNAs involved in RNA interference|protein ubiquitination|RNA splicing	ko03013	RNA transport
LOC115704060	grey60	0.784663	0.667426	0.848279	0.796423	2.48852	2.00358	2.76866	2.6704	EIX1	Solyc07g00862011	Receptor-like protein EIX1	GeneID:115704060	GO:0016021,GO:0005886,GO:0050832	integral component of membrane|plasma membrane|defense response to fungus
LOC115704098	grey60	3.07087	2.52589	2.60475	2.3167	4.45293	3.21999	4.41768	4.51212	UP3	At2g31670	Stress-response A/B barrel domain-containing protein UP3	GeneID:115704098	GO:0009507,GO:0009570,GO:0005777	chloroplast|chloroplast stroma|peroxisome
LOC115704102	grey60	1.82817	1.28914	1.14507	1.6273	2.44164	2.58364	2.25846	1.43434				GeneID:115704102
LOC115704140	grey60	1.64492	2.0744	1.41127	2.26537	2.87761	2.66531	2.38368	2.86192	KAI2	At4g37470	Probable esterase KAI2	GeneID:115704140	GO:0005829,GO:0005634,GO:0016787,GO:0009704,GO:0009640,GO:0080167	cytosol|nucleus|hydrolase activity|de-etiolation|photomorphogenesis|response to karrikin
LOC115704169	grey60	0.83697	0.551331	0.55672	0.410766	4.1601	4.11539	4.27304	3.93246	APRR5	At5g24470	Two-component response regulator-like APRR5	GeneID:115704169	GO:0005634,GO:0000160,GO:0048511	nucleus|phosphorelay signal transduction system|rhythmic process	ko04712	Circadian rhythm - plant
LOC115704178	grey60	0	0	0	0	0.630235	0.868883	1.60382	1.35198	GULLO6	At2g46760	Probable L-gulonolactone oxidase 6	GeneID:115704178	GO:0016020,GO:0003885,GO:0071949,GO:0050105,GO:0019853	membrane|D-arabinono-1,4-lactone oxidase activity|FAD binding|L-gulonolactone oxidase activity|L-ascorbic acid biosynthetic process	ko00053	Ascorbate and aldarate metabolism
LOC115704197	grey60	1.70508	1.22705	1.78866	2.62092	4.99664	4.60675	4.08703	4.67005			Probable glutathione S-transferase	GeneID:115704197	GO:0004364,GO:0009734	glutathione transferase activity|auxin-activated signaling pathway	ko00480	Glutathione metabolism
LOC115704198	grey60	0.873304	0.801513	0.652616	0.827326	1.87503	1.85858	2.07243	2.53388	EIX2	Solyc07g00863011	Receptor-like protein EIX2	GeneID:115704198	GO:0016021,GO:0005886,GO:0050832	integral component of membrane|plasma membrane|defense response to fungus
LOC115704229	grey60	1.56049	1.43651	1.68053	1.63038	2.80526	2.97733	2.96508	2.91707				GeneID:115704229
LOC115704272	grey60	0.116739	0.20943	0.308435	0.37863	1.39997	1.70215	1.82939	2.24063		At5g08430	Uncharacterized protein At5g08430	GeneID:115704272	GO:0003677	DNA binding
LOC115704298	grey60	3.06481	2.77208	3.00318	2.98803	4.60171	4.08155	4.7405	4.19407	STR4	At4g01050	Rhodanese-like domain-containing protein 4, chloroplastic	GeneID:115704298	GO:0009507,GO:0009941,GO:0009534,GO:0009535,GO:0098807,GO:0016021,GO:0042742,GO:0009772	chloroplast|chloroplast envelope|chloroplast thylakoid|chloroplast thylakoid membrane|chloroplast thylakoid membrane protein complex|integral component of membrane|defense response to bacterium|photosynthetic electron transport in photosystem II
LOC115704418	grey60	0.0184278	0.0195124	0	0	4.19206	3.33744	4.42117	3.56047	NFD4	At1g31470	Protein NUCLEAR FUSION DEFECTIVE 4	GeneID:115704418	GO:0016021,GO:0005739,GO:0000741,GO:0010197,GO:0009651	integral component of membrane|mitochondrion|karyogamy|polar nucleus fusion|response to salt stress
LOC115704435	grey60	0.551909	0.428194	0.840609	0.734453	3.24429	5.22066	3.47595	4.52207				GeneID:115704435
LOC115704491	grey60	0.788353	0.780706	0.475464	1.32743	2.27755	2.70354	2.49293	1.80492	SDR1	At3g61220	(+)-neomenthol dehydrogenase	GeneID:115704491	GO:0005737,GO:0047501,GO:0006952,GO:0055114	cytoplasm|(+)-neomenthol dehydrogenase activity|defense response|oxidation-reduction process	ko00902	Monoterpenoid biosynthesis
LOC115704529	grey60	2.13575	2.79637	2.28606	2.10462	3.61338	1.91771	3.17306	3.19301		Os01g0234100	B3 domain-containing protein Os01g0234100	GeneID:115704529	GO:0005634,GO:0003677	nucleus|DNA binding
LOC115704667	grey60	2.98873	2.94085	2.96354	2.95594	4.91577	3.5937	4.322	3.60231			Annexin-like protein RJ4	GeneID:115704667	GO:0005509,GO:0005544	calcium ion binding|calcium-dependent phospholipid binding
LOC115704718	grey60	1.06401	1.35192	1.08287	1.29658	2.11559	2.40407	2.01864	2.01097	HEI10	At1g53490	E3 ubiquitin-protein ligase CCNB1IP1 homolog	GeneID:115704718	GO:0005712,GO:0005694,GO:0046872,GO:0016740,GO:0051026,GO:0035825,GO:0051321,GO:0016567,GO:0007131	chiasma|chromosome|metal ion binding|transferase activity|chiasma assembly|homologous recombination|meiotic cell cycle|protein ubiquitination|reciprocal meiotic recombination
LOC115704784	grey60	0.748753	1.18016	1.04326	0.85052	2.13304	1.8315	1.56934	2.10022	FEN1	At5g26680	Flap endonuclease 1	GeneID:115704784	GO:0005739,GO:0005730,GO:0005654,GO:0017108,GO:0003677,GO:0051908,GO:0048256,GO:0000287,GO:0045145,GO:0006284,GO:0043137	mitochondrion|nucleolus|nucleoplasm|5'-flap endonuclease activity|DNA binding|double-stranded DNA 5'-3' exodeoxyribonuclease activity|flap endonuclease activity|magnesium ion binding|single-stranded DNA 5'-3' exodeoxyribonuclease activity|base-excision repair|DNA replication, removal of RNA primer
LOC115704796	grey60	0.362734	0.530177	0.427549	0.483475	1.40968	1.12675	1.62339	1.24291	COIL	At1g13030	Coilin	GeneID:115704796	GO:0015030,GO:0030619,GO:0030620,GO:0006396	Cajal body|U1 snRNA binding|U2 snRNA binding|RNA processing
LOC115704828	grey60	1.06581	1.02109	1.11647	1.56609	2.09277	2.50613	2.80789	2.06784				GeneID:115704828
LOC115704830	grey60	0.361772	0.309173	0.26485	0.370918	1.26252	1.42225	1.57724	1.65381	SYT3	At5g04220	Synaptotagmin-3	GeneID:115704830	GO:0005783,GO:0016021,GO:0008289,GO:0046872,GO:0006869	endoplasmic reticulum|integral component of membrane|lipid binding|metal ion binding|lipid transport
LOC115704862	grey60	0	0.0335603	0	0	1.97188	0.0364055	1.50786	1.68016	plaa2		Exopolygalacturonase	GeneID:115704862	GO:0005618,GO:0005576,GO:0047911,GO:0019863,GO:0004650,GO:0071555,GO:0045490	cell wall|extracellular region|galacturan 1,4-alpha-galacturonidase activity|IgE binding|polygalacturonase activity|cell wall organization|pectin catabolic process	ko00040	Pentose and glucuronate interconversions
LOC115704946	grey60	1.3458	1.42245	1.11286	1.05799	2.96323	2.10944	3.5377	2.64807	MYB1		Transcription factor MYB1	GeneID:115704946
LOC115704971	grey60	4.86766	4.42444	4.46826	4.43258	6.33935	6.51197	6.12362	5.55211	WAXY		Granule-bound starch synthase 1, chloroplastic/amyloplastic	GeneID:115704971	GO:0009501,GO:0009507,GO:0033201,GO:0004373,GO:0009011,GO:0019252	amyloplast|chloroplast|alpha-1,4-glucan synthase activity|glycogen (starch) synthase activity|starch synthase activity|starch biosynthetic process	ko00500	Starch and sucrose metabolism
LOC115705017	grey60	0	0.0278661	0.19636	0	3.07994	3.02446	1.93916	2.51173	SAT4	At4g35640	Serine acetyltransferase 4	GeneID:115705017	GO:0005829,GO:0009001,GO:0006535,GO:0000103	cytosol|serine O-acetyltransferase activity|cysteine biosynthetic process from serine|sulfate assimilation	ko00270,ko00920	Cysteine and methionine metabolism|Sulfur metabolism
LOC115705036	grey60	1.15691	0.776342	0.959767	0.526729	2.03756	2.2438	2.16883	1.81982				GeneID:115705036
LOC115705050	grey60	3.68184	3.67866	3.79143	3.6068	5.07946	5.24675	5.11625	5.03005	TS1	At4g29840	Threonine synthase 1, chloroplastic	GeneID:115705050	GO:0009507,GO:0009570,GO:0005737,GO:0005829,GO:0030170,GO:0004795,GO:0009088	chloroplast|chloroplast stroma|cytoplasm|cytosol|pyridoxal phosphate binding|threonine synthase activity|threonine biosynthetic process	ko00260,ko00750	Glycine, serine and threonine metabolism|Vitamin B6 metabolism
LOC115705070	grey60	0.400746	0.239871	0.471315	0.337422	1.81354	1.72591	2.13852	2.01464	DET2		Steroid 5-alpha-reductase DET2	GeneID:115705070	GO:0005737,GO:0016021,GO:0003865,GO:0047751,GO:0050213,GO:0016132,GO:0055114,GO:0090378,GO:0090377	cytoplasm|integral component of membrane|3-oxo-5-alpha-steroid 4-dehydrogenase activity|cholestenone 5-alpha-reductase activity|progesterone 5-alpha-reductase activity|brassinosteroid biosynthetic process|oxidation-reduction process|seed trichome elongation|seed trichome initiation
LOC115705085	grey60	0.3707	0.235528	0.278663	0.441146	2.78427	2.25672	2.90933	2.24544		At5g03610	GDSL esterase/lipase At5g03610	GeneID:115705085	GO:0005576,GO:0016788,GO:0016042	extracellular region|hydrolase activity, acting on ester bonds|lipid catabolic process
LOC115705093	grey60	2.52572	2.21976	2.02377	1.822	3.67351	3.67037	4.39502	3.62324				GeneID:115705093
LOC115705096	grey60	1.01821	0.445783	0.471625	0.773963	1.43859	2.05993	2.0033	1.20239	GLIP5	At1g53920	GDSL esterase/lipase 5	GeneID:115705096	GO:0005576,GO:0016298,GO:0016042	extracellular region|lipase activity|lipid catabolic process
LOC115705176	grey60	1.8475	1.98789	1.63792	1.70133	2.59021	2.77253	3.15495	2.92476				GeneID:115705176
LOC115705224	grey60	5.54239	5.28743	5.44995	5.18404	7.64221	6.76585	7.23834	6.54477	LHY		Protein LATE ELONGATED HYPOCOTYL	GeneID:115705224	GO:0005634,GO:0003700,GO:0044212,GO:0007623,GO:0048574,GO:0042754,GO:0043433,GO:0042752,GO:0006355,GO:0009737,GO:0009733,GO:0046686,GO:0009409,GO:0009723,GO:0009739,GO:0009753,GO:0009751,GO:0009651	nucleus|DNA-binding transcription factor activity|transcription regulatory region DNA binding|circadian rhythm|long-day photoperiodism, flowering|negative regulation of circadian rhythm|negative regulation of DNA-binding transcription factor activity|regulation of circadian rhythm|regulation of transcription, DNA-templated|response to abscisic acid|response to auxin|response to cadmium ion|respon…	ko04712	Circadian rhythm - plant
LOC115705266	grey60	2.76206	1.82085	1.85273	1.85491	3.2256	3.7482	2.80345	2.87155	BOR4	At1g15460	Boron transporter 4	GeneID:115705266	GO:0005887,GO:0005886,GO:0015301,GO:0080139,GO:0005452,GO:0046713,GO:0080029,GO:0051453	integral component of plasma membrane|plasma membrane|anion:anion antiporter activity|borate efflux transmembrane transporter activity|inorganic anion exchanger activity|borate transport|cellular response to boron-containing substance levels|regulation of intracellular pH
LOC115705298	grey60	3.76698	3.27802	2.89286	2.88878	4.33608	3.64263	2.8284	2.83038	ADS3	At3g15850	Palmitoyl-monogalactosyldiacylglycerol delta-7 desaturase, chloroplastic	GeneID:115705298	GO:0031969,GO:0005789,GO:0016021,GO:0009579,GO:0009979,GO:0016717,GO:0031408,GO:0010205,GO:0006636	chloroplast membrane|endoplasmic reticulum membrane|integral component of membrane|thylakoid|16:0 monogalactosyldiacylglycerol desaturase activity|oxidoreductase activity, acting on paired donors, with oxidation of a pair of donors resulting in the reduction of molecular oxygen to two molecules of water|oxylipin biosynthetic process|photoinhibition|unsaturated fatty acid biosynthetic process
LOC115705377	grey60	1.3451	1.29579	1.30639	1.36082	2.597	2.21542	2.27535	2.34482			B2 protein	GeneID:115705377
LOC115705385	grey60	3.9531	4.00332	4.18463	3.79566	5.04964	4.81676	4.92524	5.69607				GeneID:115705385
LOC115705432	grey60	2.74326	2.96874	2.63845	2.93552	4.16327	3.65312	3.27229	3.85751	PRP40A	At1g44910	Pre-mRNA-processing protein 40A	GeneID:115705432	GO:0005829,GO:0016592,GO:0005685,GO:0071004,GO:0003723,GO:0000398	cytosol|mediator complex|U1 snRNP|U2-type prespliceosome|RNA binding|mRNA splicing, via spliceosome	ko03040	Spliceosome
LOC115705482	grey60	0.878459	0.95435	0.864974	1.06018	4.21852	3.89822	3.72451	3.56856	EMB8		Embryogenesis-associated protein EMB8	GeneID:115705482	GO:0052689	carboxylic ester hydrolase activity
LOC115705487	grey60	1.43857	1.28121	1.31438	1.33436	5.84643	5.03426	5.04305	5.67563				GeneID:115705487
LOC115705494	grey60	3.12601	3.0466	3.22071	3.09551	4.02028	3.80489	4.18689	4.29697				GeneID:115705494
LOC115705538	grey60	1.78519	1.78493	1.78512	1.6904	2.80647	2.92159	3.20398	2.92577				GeneID:115705538
LOC115705556	grey60	3.46747	3.32906	3.31824	3.19227	4.63336	4.3861	4.53509	4.39154	LIF2	At4g00830	Heterogeneous nuclear ribonucleoprotein Q	GeneID:115705556	GO:0005737,GO:0005829,GO:0005783,GO:0005634,GO:0003682,GO:0003729,GO:0043565,GO:0071395,GO:0042742,GO:0050832,GO:0045087,GO:0007275,GO:0045824,GO:0045893,GO:1905933,GO:0009909,GO:0010468,GO:0010439,GO:1902464,GO:0009617	cytoplasm|cytosol|endoplasmic reticulum|nucleus|chromatin binding|mRNA binding|sequence-specific DNA binding|cellular response to jasmonic acid stimulus|defense response to bacterium|defense response to fungus|innate immune response|multicellular organism development|negative regulation of innate immune response|positive regulation of transcription, DNA-templated|regulation of cell fate determina…
LOC115705565	grey60	4.86844	5.31184	4.29441	4.46957	6.03254	5.04757	5.87961	5.65837	PECS-2.1		Pectinesterase 2	GeneID:115705565	GO:0005618,GO:0005576,GO:0045330,GO:0004857,GO:0030599,GO:0042545,GO:0045490	cell wall|extracellular region|aspartyl esterase activity|enzyme inhibitor activity|pectinesterase activity|cell wall modification|pectin catabolic process	ko00040	Pentose and glucuronate interconversions
LOC115705594	grey60	5.4073	5.56064	5.33442	5.16409	6.4184	6.62163	5.90264	5.80779	FAD7A-1		Omega-3 fatty acid desaturase, chloroplastic	GeneID:115705594	GO:0031969,GO:0016717,GO:0006636	chloroplast membrane|oxidoreductase activity, acting on paired donors, with oxidation of a pair of donors resulting in the reduction of molecular oxygen to two molecules of water|unsaturated fatty acid biosynthetic process
LOC115705598	grey60	4.50041	4.13781	4.2889	4.27517	6.60581	6.50802	6.33248	6.05982			Transketolase, chloroplastic	GeneID:115705598	GO:0009535,GO:0046872,GO:0004802,GO:0019253	chloroplast thylakoid membrane|metal ion binding|transketolase activity|reductive pentose-phosphate cycle	ko00030,ko00710	Pentose phosphate pathway|Carbon fixation in photosynthetic organisms
LOC115705599	grey60	3.03902	2.92527	3.16592	2.80474	4.78563	4.55787	4.7754	4.63549	EPSPS		3-phosphoshikimate 1-carboxyvinyltransferase, chloroplastic	GeneID:115705599	GO:0009507,GO:0003866,GO:0009073,GO:0009423,GO:0009635	chloroplast|3-phosphoshikimate 1-carboxyvinyltransferase activity|aromatic amino acid family biosynthetic process|chorismate biosynthetic process|response to herbicide	ko00400	Phenylalanine, tyrosine and tryptophan biosynthesis
LOC115705604	grey60	3.15382	2.95467	3.17829	3.28199	4.70831	4.25083	4.92917	4.5437				GeneID:115705604
LOC115705621	grey60	3.08125	2.97405	2.64798	2.8091	6.83114	5.04217	6.10922	5.99123				GeneID:115705621
LOC115705627	grey60	5.52475	5.1531	5.66697	5.45069	6.66478	7.13559	6.77868	6.50326	AS		Hydroquinone glucosyltransferase	GeneID:115705627	GO:0050505	hydroquinone glucosyltransferase activity
LOC115705629	grey60	2.4501	2.21098	2.31786	2.40193	3.77012	3.85145	4.06227	3.76188	CDC31	YOR257W	Cell division control protein 31	GeneID:115705629	GO:0005813,GO:0005825,GO:0005643,GO:0005634,GO:0070390,GO:0005509,GO:0042802,GO:0008017,GO:0005200,GO:0019722,GO:0051301,GO:0007020,GO:1903087,GO:0051028,GO:0043161,GO:0015031,GO:0043549,GO:0030474	centrosome|half bridge of spindle pole body|nuclear pore|nucleus|transcription export complex 2|calcium ion binding|identical protein binding|microtubule binding|structural constituent of cytoskeleton|calcium-mediated signaling|cell division|microtubule nucleation|mitotic spindle pole body duplication|mRNA transport|proteasome-mediated ubiquitin-dependent protein catabolic process|protein transpo…
LOC115705636	grey60	1.0747	1.19235	0.489249	0.962591	2.02206	1.40156	1.97182	1.77362	STP14	At1g77210	Sugar transport protein 14	GeneID:115705636	GO:0005887,GO:0005886,GO:0005351,GO:0005355,GO:0008645	integral component of plasma membrane|plasma membrane|carbohydrate:proton symporter activity|glucose transmembrane transporter activity|hexose transmembrane transport
LOC115705658	grey60	1.41164	1.03932	1.04174	1.34933	2.14927	2.48564	2.45936	2.09669	PCMP-H66	At2g15690	Pentatricopeptide repeat-containing protein At2g15690, mitochondrial	GeneID:115705658
LOC115705683	grey60	0.409162	0.205182	0.324528	0.404711	4.18425	3.70645	4.20964	3.9113			Peptide-N4-(N-acetyl-beta-glucosaminyl)asparagine amidase A heavy chain	GeneID:115705683	GO:0000224	peptide-N4-(N-acetyl-beta-glucosaminyl)asparagine amidase activity
LOC115705721	grey60	4.71368	4.53998	4.6206	4.59983	5.66163	5.5252	5.88288	5.42287	PFK3	At4g26270	ATP-dependent 6-phosphofructokinase 3	GeneID:115705721	GO:0005829,GO:0003872,GO:0005524,GO:0046872,GO:0006002,GO:0006096,GO:0010053	cytosol|6-phosphofructokinase activity|ATP binding|metal ion binding|fructose 6-phosphate metabolic process|glycolytic process|root epidermal cell differentiation	ko00010,ko00030,ko00051,ko00052,ko03018	Glycolysis / Gluconeogenesis|Pentose phosphate pathway|Fructose and mannose metabolism|Galactose metabolism|RNA degradation
LOC115705733	grey60	0.226951	0.277745	0.25426	0.204451	1.83964	1.76934	1.84095	1.61705		At3g03770	Probable inactive leucine-rich repeat receptor-like protein kinase At3g03770	GeneID:115705733
LOC115705762	grey60	1.90308	1.80017	1.9288	1.9802	3.52939	3.47881	3.40048	3.02586				GeneID:115705762
LOC115705773	grey60	0.328875	0.148586	0.195124	0.165504	1.21285	1.00091	1.50854	0.264511	DET2		Steroid 5-alpha-reductase DET2	GeneID:115705773	GO:0005737,GO:0016021,GO:0003865,GO:0047751,GO:0050213,GO:0016132,GO:0055114,GO:0090378,GO:0090377	cytoplasm|integral component of membrane|3-oxo-5-alpha-steroid 4-dehydrogenase activity|cholestenone 5-alpha-reductase activity|progesterone 5-alpha-reductase activity|brassinosteroid biosynthetic process|oxidation-reduction process|seed trichome elongation|seed trichome initiation
LOC115705786	grey60	0.929463	0.73409	0.596132	1.66919	5.02677	4.81205	4.27987	4.91761			Probable glutathione S-transferase	GeneID:115705786	GO:0004364,GO:0009734	glutathione transferase activity|auxin-activated signaling pathway	ko00480	Glutathione metabolism
LOC115705789	grey60	6.44633	6.21856	5.25262	6.04034	6.72391	7.04769	7.03281	6.80567			Probable glutathione S-transferase	GeneID:115705789	GO:0004364,GO:0009734	glutathione transferase activity|auxin-activated signaling pathway	ko00480	Glutathione metabolism
LOC115705821	grey60	4.04239	3.38557	3.98677	3.55576	4.38978	4.70088	4.29978	4.92526	TPPA	At5g51460	Trehalose-phosphate phosphatase A	GeneID:115705821	GO:0004805,GO:0005992	trehalose-phosphatase activity|trehalose biosynthetic process	ko00500	Starch and sucrose metabolism
LOC115705835	grey60	1.33296	2.0297	1.48815	0.747467	2.27086	1.77519	2.96915	2.39967				GeneID:115705835
LOC115705847	grey60	0.0319822	0.1309	0.266479	0.0303853	4.81529	3.96044	4.92354	4.53458	PPA3	At2g46860	Soluble inorganic pyrophosphatase 3	GeneID:115705847	GO:0005737,GO:0004427,GO:0000287,GO:0019915,GO:0006796	cytoplasm|inorganic diphosphatase activity|magnesium ion binding|lipid storage|phosphate-containing compound metabolic process	ko00190	Oxidative phosphorylation
LOC115705870	grey60	2.40408	2.3364	2.50355	2.73024	6.39047	5.6578	3.4914	5.69987			Peptide methionine sulfoxide reductase	GeneID:115705870	GO:0008113	peptide-methionine (S)-S-oxide reductase activity
LOC115705873	grey60	3.20156	3.03406	3.14643	3.08624	4.08622	4.39078	4.35893	4.17156	CDA1	At2g19570	Cytidine deaminase 1	GeneID:115705873	GO:0005829,GO:0004126,GO:0047844,GO:0042803,GO:0008270,GO:0006216,GO:0009972	cytosol|cytidine deaminase activity|deoxycytidine deaminase activity|protein homodimerization activity|zinc ion binding|cytidine catabolic process|cytidine deamination	ko00240	Pyrimidine metabolism
LOC115705897	grey60	3.71708	3.49896	3.86984	3.798	6.18167	6.63227	8.79075	6.34831	BAG6	At2g46240	Cleaved BAG6	GeneID:115705897	GO:0009506,GO:0005516,GO:0051087,GO:0006914,GO:0050832,GO:0009817,GO:0012502,GO:0010508,GO:0006457,GO:0009408,GO:0009644,GO:0042542,GO:0010228	plasmodesma|calmodulin binding|chaperone binding|autophagy|defense response to fungus|defense response to fungus, incompatible interaction|induction of programmed cell death|positive regulation of autophagy|protein folding|response to heat|response to high light intensity|response to hydrogen peroxide|vegetative to reproductive phase transition of meristem
LOC115705934	grey60	0.445939	0.51227	0.701333	0.811245	2.99121	2.37872	1.27336	2.34547	CRSP	At1g20160	CO(2)-response secreted protease	GeneID:115705934	GO:0048046,GO:0005618,GO:0004252,GO:0008236,GO:1900425,GO:2000122,GO:0006508,GO:2000038,GO:0010037	apoplast|cell wall|serine-type endopeptidase activity|serine-type peptidase activity|negative regulation of defense response to bacterium|negative regulation of stomatal complex development|proteolysis|regulation of stomatal complex development|response to carbon dioxide
LOC115705942	grey60	3.27412	3.13973	2.6619	2.96068	3.92717	2.63061	4.00379	3.25121				GeneID:115705942
LOC115706006	grey60	0	0	0	0	0.539157	0.849507	1.18925	1.27295	NFD4	At1g31470	Protein NUCLEAR FUSION DEFECTIVE 4	GeneID:115706006	GO:0016021,GO:0005739,GO:0000741,GO:0010197,GO:0009651	integral component of membrane|mitochondrion|karyogamy|polar nucleus fusion|response to salt stress
LOC115706131	grey60	5.32386	5.17695	5.26413	5.18165	6.24821	6.31722	6.2634	6.36184	VPS321	At2g19830	Vacuolar protein sorting-associated protein 32 homolog 1	GeneID:115706131	GO:0000815,GO:0005886,GO:0015031,GO:0007034	ESCRT III complex|plasma membrane|protein transport|vacuolar transport	ko04144	Endocytosis
LOC115706148	grey60	7.49091	6.71898	7.51483	7.64112	8.40621	8.32271	7.7545	8.21446	CCH	At3g56240	Copper transport protein CCH	GeneID:115706148	GO:0048046,GO:0009507,GO:0016531,GO:0019904,GO:0006878,GO:0006825,GO:0046686,GO:0009651	apoplast|chloroplast|copper chaperone activity|protein domain specific binding|cellular copper ion homeostasis|copper ion transport|response to cadmium ion|response to salt stress
LOC115706208	grey60	2.47697	2.26463	2.23782	1.98125	2.98133	2.07669	3.11244	3.35615		At5g51130	Probable RNA methyltransferase At5g51130	GeneID:115706208	GO:0008171,GO:0008173,GO:0017069,GO:0040031	O-methyltransferase activity|RNA methyltransferase activity|snRNA binding|snRNA modification
LOC115706225	grey60	3.05824	2.95152	3.15023	3.67907	8.62028	8.49488	9.03257	8.69974	CYP78A3		Cytochrome P450 78A3	GeneID:115706225	GO:0016020,GO:0020037,GO:0005506,GO:0016709	membrane|heme binding|iron ion binding|oxidoreductase activity,acting on paired donors, with incorporation or reduction of molecular oxygen, NAD(P)H as one donor, and incorporation of one atom of oxygen
LOC115706260	grey60	0.642577	0.069744	0.561774	0.289246	1.85636	1.12646	1.84961	0.832646	SAUR32	At2g46690	Auxin-responsive protein SAUR32	GeneID:115706260	GO:0005737,GO:0005634,GO:0009734,GO:0007275,GO:0040008,GO:1900140	cytoplasm|nucleus|auxin-activated signaling pathway|multicellular organism development|regulation of growth|regulation of seedling development
LOC115706265	grey60	5.46412	4.91617	5.34078	5.93824	6.51471	6.15736	6.24641	6.1577	BGLU18	Os04g0513900	Beta-glucosidase 18	GeneID:115706265	GO:0008422,GO:0102483,GO:0005975	beta-glucosidase activity|scopolin beta-glucosidase activity|carbohydrate metabolic process	ko00460,ko00500,ko00940	Cyanoamino acid metabolism|Starch and sucrose metabolism|Phenylpropanoid biosynthesis
LOC115706280	grey60	3.25288	2.65714	2.81761	2.74802	3.95861	3.52066	4.12619	4.96739	CNGC13	At4g01010	Putative cyclic nucleotide-gated ion channel 13	GeneID:115706280	GO:0016021,GO:0005886,GO:0005516,GO:0030552,GO:0030553,GO:0005216	integral component of membrane|plasma membrane|calmodulin binding|cAMP binding|cGMP binding|ion channel activity	ko04626	Plant-pathogen interaction
LOC115706288	grey60	6.37846	5.54084	5.34566	5.83524	7.67845	5.9926	6.77406	6.75728		At4g27520	Early nodulin-like protein 2	GeneID:115706288	GO:0031225,GO:0046658,GO:0048046,GO:0009507,GO:0005886,GO:0005773,GO:0009055	anchored component of membrane|anchored component of plasma membrane|apoplast|chloroplast|plasma membrane|vacuole|electron transfer activity
LOC115706291	grey60	5.24845	5.06367	4.57126	4.62167	6.1708	5.61586	5.39284	5.05686	PMI1	At1g42550	Protein PLASTID MOVEMENT IMPAIRED 1	GeneID:115706291	GO:0005829,GO:0005886,GO:1902265,GO:0009738,GO:0030048,GO:0009903,GO:0009902,GO:0031022,GO:0009787,GO:0010029,GO:0009637,GO:0006970	cytosol|plasma membrane|abscisic acid homeostasis|abscisic acid-activated signaling pathway|actin filament-based movement|chloroplast avoidance movement|chloroplast relocation|nuclear migration along microfilament|regulation of abscisic acid-activated signaling pathway|regulation of seed germination|response to blue light|response to osmotic stress
LOC115706424	grey60	6.35507	6.2305	6.42605	6.54322	7.19008	7.82322	7.66437	6.77048	LHCB43	At2g40100	Chlorophyll a-b binding protein CP29.3, chloroplastic	GeneID:115706424	GO:0009507,GO:0009941,GO:0009534,GO:0009535,GO:0016021,GO:0016020,GO:0009522,GO:0009523,GO:0010287,GO:0009579,GO:0016168,GO:0046872,GO:0009768,GO:0018298,GO:0009637,GO:0010218,GO:0009416,GO:0010114	chloroplast|chloroplast envelope|chloroplast thylakoid|chloroplast thylakoid membrane|integral component of membrane|membrane|photosystem I|photosystem II|plastoglobule|thylakoid|chlorophyll binding|metal ion binding|photosynthesis, light harvesting in photosystem I|protein-chromophore linkage|response to blue light|response to far red light|response to light stimulus|response to red light	ko00196	Photosynthesis - antenna proteins
LOC115706440	grey60	0.382252	0.354458	0.0645521	0.299191	2.01104	2.32897	2.6805	2.55289			Anthranilate N-methyltransferase	GeneID:115706440	GO:0030774,GO:0008171,GO:0046983	anthranilate N-methyltransferase activity|O-methyltransferase activity|protein dimerization activity	ko00940	Phenylpropanoid biosynthesis
LOC115706447	grey60	5.91358	5.55841	5.70831	5.82353	6.71606	7.16057	6.45095	6.43627	NBS		Norbelladine synthase	GeneID:115706447	GO:0005789,GO:0016021,GO:0005774,GO:0050474,GO:1901010,GO:0006952,GO:0002238	endoplasmic reticulum membrane|integral component of membrane|vacuolar membrane|(S)-norcoclaurine synthase activity|(S)-reticuline metabolic process|defense response|response to molecule of fungal origin
LOC115706454	grey60	0.343188	0.146233	0.541731	0.131757	2.60142	2.9338	4.20256	3.76185	ERF023	At1g01250	Ethylene-responsive transcription factor ERF023	GeneID:115706454	GO:0005634,GO:0003677,GO:0003700,GO:0009873	nucleus|DNA binding|DNA-binding transcription factor activity|ethylene-activated signaling pathway
LOC115706481	grey60	5.35331	5.33049	5.13719	4.89915	6.14746	6.51445	5.85338	5.61195	PHT4;4	At4g00370	Ascorbate transporter, chloroplastic	GeneID:115706481	GO:0009507,GO:0009941,GO:0009706,GO:0016021,GO:0009536,GO:0005315,GO:0015229,GO:0015882,GO:0010028	chloroplast|chloroplast envelope|chloroplast inner membrane|integral component of membrane|plastid|inorganic phosphate transmembrane transporter activity|L-ascorbic acid transmembrane transporter activity|L-ascorbic acid transmembrane transport|xanthophyll cycle
LOC115706549	grey60	2.0348	1.92703	1.29874	1.87003	3.91176	3.77536	3.45722	2.85488	SDR1	At3g61220	(+)-neomenthol dehydrogenase	GeneID:115706549	GO:0005737,GO:0047501,GO:0006952,GO:0055114	cytoplasm|(+)-neomenthol dehydrogenase activity|defense response|oxidation-reduction process	ko00902	Monoterpenoid biosynthesis
LOC115706566	grey60	0.780704	0.478577	0.78927	0.578867	1.91662	1.76213	1.6977	2.17071	SAT5	At5g56760	Serine acetyltransferase 5	GeneID:115706566	GO:0005829,GO:0009001,GO:0006535	cytosol|serine O-acetyltransferase activity|cysteine biosynthetic process from serine	ko00270,ko00920	Cysteine and methionine metabolism|Sulfur metabolism
LOC115706688	grey60	6.17417	5.66897	5.65809	5.48474	6.79144	6.75879	6.63252	5.86667		At3g10130	Heme-binding-like protein At3g10130, chloroplastic	GeneID:115706688	GO:0009507,GO:0009535,GO:0010287,GO:0020037	chloroplast|chloroplast thylakoid membrane|plastoglobule|heme binding
LOC115706690	grey60	4.76096	4.77596	4.74752	4.62688	5.88535	5.99039	6.19845	5.91158	TON1B	At3g55005	Protein TONNEAU 1b	GeneID:115706690	GO:0030981,GO:0005737,GO:0005886,GO:0030865,GO:0000226,GO:0000913	cortical microtubule cytoskeleton|cytoplasm|plasma membrane|cortical cytoskeleton organization|microtubule cytoskeleton organization|preprophase band assembly
LOC115706733	grey60	1.91357	1.64317	2.06775	2.01122	4.06208	4.2265	4.21044	4.14464			Thymidylate synthase	GeneID:115706733	GO:0004146,GO:0004799,GO:0006231,GO:0006730,GO:0046654	dihydrofolate reductase activity|thymidylate synthase activity|dTMP biosynthetic process|one-carbon metabolic process|tetrahydrofolate biosynthetic process	ko00240,ko00670,ko00790	Pyrimidine metabolism|One carbon pool by folate|Folate biosynthesis
LOC115706735	grey60	0.215051	0.0483115	0.172862	0.0854976	2.67941	3.61802	3.13065	3.15316	LYSA2	At5g11880	Diaminopimelate decarboxylase 2, chloroplastic	GeneID:115706735	GO:0009507,GO:0009570,GO:0005829,GO:0008836,GO:0009089	chloroplast|chloroplast stroma|cytosol|diaminopimelate decarboxylase activity|lysine biosynthetic process via diaminopimelate	ko00300	Lysine biosynthesis
LOC115706744	grey60	0.645731	0.963281	1.08883	0.838593	2.61992	2.29158	2.96999	2.38539		At4g31810	3-hydroxyisobutyryl-CoA hydrolase-like protein 2, mitochondrial	GeneID:115706744	GO:0005739,GO:0003860,GO:0006635	mitochondrion|3-hydroxyisobutyryl-CoA hydrolase activity|fatty acid beta-oxidation	ko00280,ko00410,ko00640	Valine, leucine and isoleucine degradation|beta-Alanine metabolism|Propanoate metabolism
LOC115706754	grey60	5.2622	4.94461	5.75071	5.20285	7.22649	7.53446	7.68162	7.05297	PIP2-2	At2g37170	Aquaporin PIP2-2	GeneID:115706754	GO:0009507,GO:0016021,GO:0005886,GO:0009506,GO:0005773,GO:0003729,GO:0015250,GO:0009737,GO:0009414,GO:0006833	chloroplast|integral component of membrane|plasma membrane|plasmodesma|vacuole|mRNA binding|water channel activity|response to abscisic acid|response to water deprivation|water transport
LOC115706759	grey60	2.85923	2.57284	2.26331	2.74859	3.72649	3.85391	3.49692	3.40068	UGT76C2	At5g05860	UDP-glycosyltransferase 76C2	GeneID:115706759	GO:0043231,GO:0047807,GO:0080062,GO:0080043,GO:0080044,GO:0008194,GO:1901527,GO:0042631,GO:0009690,GO:1900000,GO:0048316	intracellular membrane-bounded organelle|cytokinin 7-beta-glucosyltransferase activity|cytokinin 9-beta-glucosyltransferase activity|quercetin 3-O-glucosyltransferase activity|quercetin 7-O-glucosyltransferase activity|UDP-glycosyltransferase activity|abscisic acid-activated signaling pathway involved in stomatal movement|cellular response to water deprivation|cytokinin metabolic process|regulati…
LOC115706805	grey60	2.67594	1.26104	1.34229	1.96003	3.94858	4.3804	5.92234	3.89602				GeneID:115706805
LOC115706817	grey60	1.58566	1.91092	1.52949	1.48619	5.70935	4.55269	6.29116	7.32914	TIFY10A	At1g19180	Protein TIFY 10A	GeneID:115706817	GO:0005634,GO:0042742,GO:0009908,GO:0009867,GO:0009555,GO:1900067,GO:0031347,GO:2000022,GO:0009753,GO:0009611	nucleus|defense response to bacterium|flower development|jasmonic acid mediated signaling pathway|pollen development|regulation of cellular response to alkaline pH|regulation of defense response|regulation of jasmonic acid mediated signaling pathway|response to jasmonic acid|response to wounding	ko04075	Plant hormone signal transduction
LOC115706866	grey60	3.42357	3.43257	3.75861	3.80894	4.7139	4.90072	4.95022	4.65051		At1g67280	Probable lactoylglutathione lyase, chloroplastic	GeneID:115706866	GO:0009507,GO:0009570,GO:0010319,GO:0009579,GO:0031977,GO:0004462,GO:0046872,GO:0019243,GO:0009409	chloroplast|chloroplast stroma|stromule|thylakoid|thylakoid lumen|lactoylglutathione lyase activity|metal ion binding|methylglyoxal catabolic process to D-lactate via S-lactoyl-glutathione|response to cold	ko00620	Pyruvate metabolism
LOC115706867	grey60	5.92531	6.04561	5.4619	5.76723	6.69687	6.73766	6.84455	6.51213			Ferritin-3, chloroplastic	GeneID:115706867	GO:0009507,GO:0009941,GO:0009570,GO:0009535,GO:0005737,GO:0016020,GO:0005739,GO:0009579,GO:0008199,GO:0008198,GO:0004322,GO:0042802,GO:0005506,GO:0009908,GO:0006880,GO:0006826,GO:0048366,GO:0015979,GO:0009617,GO:0009409,GO:0009735,GO:0042542,GO:0010039,GO:0000302	chloroplast|chloroplast envelope|chloroplast stroma|chloroplast thylakoid membrane|cytoplasm|membrane|mitochondrion|thylakoid|ferric iron binding|ferrous iron binding|ferroxidase activity|identical protein binding|iron ion binding|flower development|intracellular sequestering of iron ion|iron ion transport|leaf development|photosynthesis|response to bacterium|response to cold|response to cytokini…
LOC115706873	grey60	0	0	0	0	1.09227	0.997131	0.901805	2.05052				GeneID:115706873
LOC115706887	grey60	2.01725	1.47401	2.19692	1.81744	2.87046	2.18659	2.98297	2.84804	HPAT3	At5g13500	Hydroxyproline O-arabinosyltransferase 3	GeneID:115706887	GO:0005768,GO:0005794,GO:0016021,GO:0005802,GO:1990585	endosome|Golgi apparatus|integral component of membrane|trans-Golgi network|hydroxyproline O-arabinosyltransferase activity	ko00514	Other types of O-glycan biosynthesis
LOC115707100	grey60	3.15419	2.99894	3.0687	2.88813	4.84505	4.73288	4.7302	4.91604				GeneID:115707100
LOC115707161	grey60	2.2244	2.17319	2.0013	2.20806	2.97282	3.08498	3.32548	2.97891	GLIP1	At5g40990	GDSL esterase/lipase 1	GeneID:115707161	GO:0005615,GO:0005622,GO:0016298,GO:0042742,GO:0050832,GO:0009817,GO:0009866,GO:0009871,GO:0016042,GO:0009620,GO:0009751,GO:0009627	extracellular space|intracellular|lipase activity|defense response to bacterium|defense response to fungus|defense response to fungus, incompatible interaction|induced systemic resistance, ethylene mediated signaling pathway|jasmonic acid and ethylene-dependent systemic resistance, ethylene mediated signaling pathway|lipid catabolic process|response to fungus|response to salicylic acid|systemic a…
LOC115707221	grey60	2.36894	2.0876	2.14908	2.10137	3.42116	2.75323	3.11087	2.86379	ATL42	At4g28890	E3 ubiquitin-protein ligase ATL42	GeneID:115707221	GO:0016021,GO:0046872,GO:0004842,GO:0016567	integral component of membrane|metal ion binding|ubiquitin-protein transferase activity|protein ubiquitination
LOC115707234	grey60	1.51491	1.65266	1.8241	1.49402	3.34127	2.92029	2.51688	2.76026	DEFH21		MADS-box protein defh21	GeneID:115707234	GO:0005634,GO:0003700,GO:0046983,GO:0000977,GO:0045944,GO:0048316	nucleus|DNA-binding transcription factor activity|protein dimerization activity|RNA polymerase II regulatory region sequence-specific DNA binding|positive regulation of transcription by RNA polymerase II|seed development
LOC115707240	grey60	3.918	3.95522	3.98458	4.07838	4.84131	5.24738	5.08943	5.07686	ABCI6	At3g10670	ABC transporter I family member 6, chloroplastic	GeneID:115707240	GO:0009507,GO:0009570,GO:0005524,GO:0042626,GO:0005215,GO:0009793,GO:0010027	chloroplast|chloroplast stroma|ATP binding|ATPase activity, coupled to transmembrane movement of substances|transporter activity|embryo development ending in seed dormancy|thylakoid membrane organization
LOC115707266	grey60	3.91679	3.41657	4.39307	4.47312	5.375	5.81255	5.81376	5.53206	PMEI3	At5g20740	Pectinesterase inhibitor 3	GeneID:115707266	GO:0048046,GO:0004857,GO:0043086,GO:1902183	apoplast|enzyme inhibitor activity|negative regulation of catalytic activity|regulation of shoot apical meristem development
LOC115707288	grey60	4.66004	3.52615	3.21631	3.96967	4.94071	4.77502	4.77675	5.03278				GeneID:115707288
LOC115707366	grey60	2.79712	3.01862	3.36035	3.04811	4.09562	3.93335	4.01843	3.70877	AT5	At5g55340	Probable long-chain-alcohol O-fatty-acyltransferase 5	GeneID:115707366	GO:0016021,GO:0102966,GO:0047196,GO:0103095,GO:0006629	integral component of membrane|arachidoyl-CoA:1-dodecanol O-acyltransferase activity|long-chain-alcohol O-fatty-acyltransferase activity|wax ester synthase activity|lipid metabolic process
LOC115707391	grey60	0.52135	0.452989	0.0693506	1.05288	3.42086	1.61012	3.08919	3.25596			Non-specific lipid-transfer protein	GeneID:115707391	GO:0008289,GO:0006869	lipid binding|lipid transport
LOC115707397	grey60	5.56239	5.20662	5.20487	5.89146	6.5894	6.15148	6.71204	6.52457	ACO		1-aminocyclopropane-1-carboxylate oxidase	GeneID:115707397	GO:0009815,GO:0031418,GO:0046872,GO:0009693,GO:0009835	1-aminocyclopropane-1-carboxylate oxidase activity|L-ascorbic acid binding|metal ion binding|ethylene biosynthetic process|fruit ripening	ko00270	Cysteine and methionine metabolism
LOC115707411	grey60	6.49497	6.15584	5.84655	6.15628	7.20146	7.31356	7.06494	6.49504	PAP		Plastid-lipid-associated protein, chloroplastic	GeneID:115707411	GO:0009507	chloroplast
LOC115707439	grey60	1.24552	1.78371	0.46141	0.435994	3.57173	1.93723	2.50062	2.6524	TPS7		(E,E)-alpha-farnesene synthase	GeneID:115707439	GO:0000287,GO:0010334,GO:0051762	magnesium ion binding|sesquiterpene synthase activity|sesquiterpene biosynthetic process	ko00909	Sesquiterpenoid and triterpenoid biosynthesis
LOC115707496	grey60	3.65334	4.04612	4.37889	4.2872	5.14588	5.40525	4.9738	4.67028	TIP2-1	At3g16240	Aquaporin TIP2-1, N-terminally processed	GeneID:115707496	GO:0005618,GO:0042807,GO:0009507,GO:0009941,GO:0005794,GO:0016021,GO:0009505,GO:0009705,GO:0005886,GO:0009506,GO:0000326,GO:0005774,GO:0005773,GO:0042802,GO:0015200,GO:0015250,GO:0006833	cell wall|central vacuole|chloroplast|chloroplast envelope|Golgi apparatus|integral component of membrane|plant-type cell wall|plant-type vacuole membrane|plasma membrane|plasmodesma|protein storage vacuole|vacuolar membrane|vacuole|identical protein binding|methylammonium transmembrane transporter activity|water channel activity|water transport
LOC115707630	grey60	0.481059	0.878481	0.985059	0.484691	1.57562	1.57401	1.87204	1.93774	IQD1	At3g09710	Protein IQ-DOMAIN 1	GeneID:115707630	GO:0005737,GO:0005874,GO:0005634,GO:0005516,GO:0008017	cytoplasm|microtubule|nucleus|calmodulin binding|microtubule binding
LOC115707643	grey60	0.970964	0.626292	0.791084	2.71814	3.21339	3.04518	3.10302	3.32805	UXS5	At3g46440	UDP-glucuronic acid decarboxylase 5	GeneID:115707643	GO:0005737,GO:0005829,GO:0070403,GO:0048040,GO:0042732,GO:0033320	cytoplasm|cytosol|NAD+ binding|UDP-glucuronate decarboxylase activity|D-xylose metabolic process|UDP-D-xylose biosynthetic process	ko00520	Amino sugar and nucleotide sugar metabolism
LOC115707655	grey60	2.68471	2.91208	2.68439	2.66617	3.72144	3.63067	4.09396	4.92952	DER1	At4g29330	Derlin-1	GeneID:115707655	GO:0005789,GO:0016021	endoplasmic reticulum membrane|integral component of membrane	ko04141	Protein processing in endoplasmic reticulum
LOC115707741	grey60	4.26638	4.25805	3.81691	4.24585	5.41051	5.54148	5.44074	4.85362				GeneID:115707741
LOC115707742	grey60	4.93854	4.4655	3.57035	4.31294	5.44891	4.17944	5.65819	5.56997	MBF1C	At3g24500	Multiprotein-bridging factor 1c	GeneID:115707742	GO:0005737,GO:0005730,GO:0003700,GO:0043565,GO:0003713,GO:0009873,GO:0045893,GO:0009737,GO:0009408,GO:0009414	cytoplasm|nucleolus|DNA-binding transcription factor activity|sequence-specific DNA binding|transcription coactivator activity|ethylene-activated signaling pathway|positive regulation of transcription, DNA-templated|response to abscisic acid|response to heat|response to water deprivation
LOC115707758	grey60	1.86778	2.06573	1.7572	1.61919	2.57016	2.40671	2.73348	3.1932	RLCK176	Os05g0110900	Receptor-like cytoplasmic kinase 176	GeneID:115707758	GO:0005524,GO:0004674,GO:0045087	ATP binding|protein serine/threonine kinase activity|innate immune response
LOC115707772	grey60	2.85649	2.87895	2.48034	3.15931	4.51276	4.15456	4.04442	3.97326			Cytochrome P450 CYP72A219	GeneID:115707772	GO:0016021,GO:0020037,GO:0005506,GO:0004497,GO:0016705	integral component of membrane|heme binding|iron ion binding|monooxygenase activity|oxidoreductase activity, acting on paired donors, with incorporation or reduction of molecular oxygen
LOC115707790	grey60	1.43371	1.739	1.62332	1.52484	3.10596	3.2976	3.57243	3.55113				GeneID:115707790
LOC115707812	grey60	3.5372	3.45514	3.24956	3.5853	5.00716	4.27832	4.32824	4.37247	INT4	At4g16480	Inositol transporter 4	GeneID:115707812	GO:0005887,GO:0005886,GO:0005351,GO:0005355,GO:0008645	integral component of plasma membrane|plasma membrane|carbohydrate:proton symporter activity|glucose transmembrane transporter activity|hexose transmembrane transport
LOC115707905	grey60	2.32608	2.14147	1.50142	1.45252	3.34563	2.55075	2.70372	3.13625	ZIF1	At5g13740	Protein ZINC INDUCED FACILITATOR 1	GeneID:115707905	GO:0016021,GO:0009705,GO:0005886,GO:0022821,GO:0090333,GO:0009624,GO:0010043,GO:0055069	integral component of membrane|plant-type vacuole membrane|plasma membrane|potassium ion antiporter activity|regulation of stomatal closure|response to nematode|response to zinc ion|zinc ion homeostasis
LOC115707927	grey60	4.25824	3.80599	3.86437	4.368	4.78066	5.39134	5.09704	4.68184	PNSB1	At1g15980	Photosynthetic NDH subunit of subcomplex B 1, chloroplastic	GeneID:115707927	GO:0009507,GO:0009534,GO:0009535,GO:0010598,GO:0009773	chloroplast|chloroplast thylakoid|chloroplast thylakoid membrane|NAD(P)H dehydrogenase complex (plastoquinone)|photosynthetic electron transport in photosystem I
LOC115707983	grey60	1.19218	1.02133	1.21992	1.16622	2.75157	3.03139	2.89237	2.72922	MKP1	At3g55270	Protein-tyrosine-phosphatase MKP1	GeneID:115707983	GO:0005829,GO:0017017,GO:0004725,GO:0006952,GO:1902065,GO:0009651,GO:0010224,GO:0010225	cytosol|MAP kinase tyrosine/serine/threonine phosphatase activity|protein tyrosine phosphatase activity|defense response|response to L-glutamate|response to salt stress|response to UV-B|response to UV-C
LOC115707986	grey60	0.103807	0.0559082	0.09806	0.114565	4.19345	4.58653	4.51733	4.10521	HEXO1	At3g55260	Beta-hexosaminidase 1	GeneID:115707986	GO:0005829,GO:0009505,GO:0005773,GO:0004563,GO:0015929,GO:0102148,GO:0005975	cytosol|plant-type cell wall|vacuole|beta-N-acetylhexosaminidase activity|hexosaminidase activity|N-acetyl-beta-D-galactosaminidase activity|carbohydrate metabolic process	ko00511,ko00513,ko00520,ko00531,ko00603,ko00604	Other glycan degradation|Various types of N-glycan biosynthesis|Amino sugar and nucleotide sugar metabolism|Glycosaminoglycan degradation|Glycosphingolipid biosynthesis - globo and isoglobo series|Glycosphingolipid biosynthesis - ganglio series
LOC115708096	grey60	1.62673	1.62446	2.17502	1.54281	2.54418	2.92957	2.90097	2.64887	GOS12	At2g45200	Golgi SNAP receptor complex member 1-2	GeneID:115708096	GO:0005801,GO:0005829,GO:0005789,GO:0005768,GO:0005794,GO:0005797,GO:0000139,GO:0016021,GO:0031201,GO:0005802,GO:0005773,GO:0005484,GO:0006888,GO:0015031,GO:0048209,GO:0009737,GO:0006906	cis-Golgi network|cytosol|endoplasmic reticulum membrane|endosome|Golgi apparatus|Golgi medial cisterna|Golgi membrane|integral component of membrane|SNARE complex|trans-Golgi network|vacuole|SNAP receptor activity|ER to Golgi vesicle-mediated transport|protein transport|regulation of vesicle targeting, to, from or within Golgi|response to abscisic acid|vesicle fusion	ko04130	SNARE interactions in vesicular transport
LOC115708144	grey60	3.21958	3.25644	3.11113	3.38439	5.0973	4.38873	5.30939	4.92483				GeneID:115708144
LOC115708200	grey60	0.933366	1.24389	1.19958	1.09778	2.35053	2.48106	2.31427	2.59472	ALG5	YPL227C	Dolichyl-phosphate beta-glucosyltransferase	GeneID:115708200	GO:0005789,GO:0016021,GO:0004581,GO:0006487	endoplasmic reticulum membrane|integral component of membrane|dolichyl-phosphate beta-glucosyltransferase activity|protein N-linked glycosylation	ko00510	N-Glycan biosynthesis
LOC115708207	grey60	2.51214	2.83327	1.90074	2.24273	3.9058	2.3334	3.48823	3.09865	MTP10	At1g16310	Metal tolerance protein 10	GeneID:115708207	GO:0016021,GO:0005774,GO:0008324	integral component of membrane|vacuolar membrane|cation transmembrane transporter activity
LOC115708215	grey60	1.73353	1.76352	2.08662	1.86174	3.07549	3.3433	2.92306	3.00486			Uncharacterized WD repeat-containing protein C32H8.09	GeneID:115708215	GO:0005829,GO:0072686,GO:0044732,GO:1990811,GO:0005634,GO:1990810,GO:0000070,GO:1902440	cytosol|mitotic spindle|mitotic spindle pole body|MWP complex|nucleus|microtubule anchoring at mitotic spindle pole body|mitotic sister chromatid segregation|protein localization to mitotic spindle pole body
LOC115708220	grey60	0.0472975	0.277168	0.20265	0.171954	2.38728	1.52523	2.23634	2.61064	SWEET14		Bidirectional sugar transporter SWEET14	GeneID:115708220	GO:0005887,GO:0008515,GO:0051119	integral component of plasma membrane|sucrose transmembrane transporter activity|sugar transmembrane transporter activity
LOC115708244	grey60	1.2963	1.98717	1.15458	0.859296	2.16914	1.98499	2.00747	2.6017	AOS3	Solyc10g007960	Allene oxide synthase 3	GeneID:115708244	GO:0046423,GO:0020037,GO:0047987,GO:0005506,GO:0016705,GO:0006952,GO:0055114,GO:0031408,GO:0016125	allene-oxide cyclase activity|heme binding|hydroperoxide dehydratase activity|iron ion binding|oxidoreductase activity, acting on paired donors, with incorporation or reduction of molecular oxygen|defense response|oxidation-reduction process|oxylipin biosynthetic process|sterol metabolic process	ko00592	alpha-Linolenic acid metabolism
LOC115708264	grey60	0.765011	1.40923	0.78357	0.348743	2.85977	1.49661	2.83431	2.19438			Caffeic acid 3-O-methyltransferase	GeneID:115708264	GO:0047763,GO:0046983,GO:0009809	caffeate O-methyltransferase activity|protein dimerization activity|lignin biosynthetic process	ko00940	Phenylpropanoid biosynthesis
LOC115708266	grey60	3.76412	3.42475	2.79141	2.89591	5.02887	5.00334	4.16741	4.68198	CXE8	At2g45600	Probable carboxylesterase 8	GeneID:115708266	GO:0052689	carboxylic ester hydrolase activity
LOC115708288	grey60	0.167362	0.0783905	0.162561	0.263303	1.52072	0.447633	2.14255	0.650476	45202	At1g16390	Organic cation/carnitine transporter 3	GeneID:115708288	GO:0016021,GO:0009705,GO:0005524,GO:0022857,GO:0070417,GO:0006811	integral component of membrane|plant-type vacuole membrane|ATP binding|transmembrane transporter activity|cellular response to cold|ion transport
LOC115708290	grey60	0.729089	0.389106	0.581059	0.900907	1.4401	1.78122	1.05457	1.62372				GeneID:115708290
LOC115708296	grey60	2.39261	1.94108	2.53152	2.70142	3.58122	3.14313	3.35862	3.09924	LSM1B	At3g14080	Sm-like protein LSM1B	GeneID:115708296	GO:1990726,GO:0005845,GO:0000932,GO:0003723,GO:0000339,GO:0009631,GO:0000290,GO:0042538,GO:0006397,GO:0009414,GO:0016070	Lsm1-7-Pat1 complex|mRNA cap binding complex|P-body|RNA binding|RNA cap binding|cold acclimation|deadenylation-dependent decapping of nuclear-transcribed mRNA|hyperosmotic salinity response|mRNA processing|response to water deprivation|RNA metabolic process	ko03018	RNA degradation
LOC115708334	grey60	0.828515	0.514786	0.251939	0.59693	3.62129	2.87269	3.2933	2.90603				GeneID:115708334
LOC115708335	grey60	4.66479	3.79812	4.47851	4.18329	5.30126	4.92531	4.50495	3.88058		At4g22990	SPX domain-containing membrane protein At4g22990	GeneID:115708335	GO:0016021,GO:0055085	integral component of membrane|transmembrane transport
LOC115708724	grey60	0.971643	0.92503	0.900255	0.817919	1.69675	2.1011	1.79063	1.96854	RGA4		Putative disease resistance protein RGA4	GeneID:115708724	GO:0043531,GO:0005524,GO:0006952	ADP binding|ATP binding|defense response
LOC115708743	grey60	0.830052	0.222996	0.733854	0.824252	1.77025	2.06224	1.1496	1.7621	TRZ4	At3g16260	tRNAse Z TRZ4, mitochondrial	GeneID:115708743	GO:0005739,GO:0042781,GO:0046872,GO:0072684,GO:0042780	mitochondrion|3'-tRNA processing endoribonuclease activity|metal ion binding|mitochondrial tRNA 3'-trailer cleavage, endonucleolytic|tRNA 3'-end processing	ko03013	RNA transport
LOC115708840	grey60	0.0782376	0.012115	0	0.0847109	1.2257	1.46368	0.819667	1.50089	EIX1	Solyc07g00862011	Receptor-like protein EIX1	GeneID:115708840	GO:0016021,GO:0005886,GO:0050832	integral component of membrane|plasma membrane|defense response to fungus
LOC115708859	grey60	4.23141	3.85882	4.07371	4.52568	5.07659	5.69426	5.36906	5.07554				GeneID:115708859
LOC115708921	grey60	3.39513	2.65408	2.97565	3.53412	5.98006	4.8519	5.5413	5.68453				GeneID:115708921
LOC115709130	grey60	0.218497	0.481206	0	0.636484	1.06736	0.852847	1.67523	0.79443				GeneID:115709130
LOC115709185	grey60	2.74697	2.10463	1.90377	2.21534	3.75939	4.28432	4.23278	3.71507	FT	At1g65480	Protein FLOWERING LOCUS T	GeneID:115709185	GO:0005737,GO:0005783,GO:0005634,GO:0008429,GO:0030154,GO:0009908,GO:0048573,GO:0009911,GO:0009909,GO:0010119	cytoplasm|endoplasmic reticulum|nucleus|phosphatidylethanolamine binding|cell differentiation|flower development|photoperiodism, flowering|positive regulation of flower development|regulation of flower development|regulation of stomatal movement	ko04712	Circadian rhythm - plant
LOC115709332	grey60	0.172037	0.151182	0.344479	0.406432	1.56146	1.99658	1.72342	1.73758	RPPL1	At3g14470	Putative disease resistance RPP13-like protein 1	GeneID:115709332
LOC115709549	grey60	1.50924	1.31633	1.43707	1.27468	2.66628	3.3001	2.63252	2.71951	ADE13	YLR359W	Adenylosuccinate lyase	GeneID:115709549	GO:0070626,GO:0004018,GO:0044208,GO:0006189,GO:0006164	(S)-2-(5-amino-1-(5-phospho-D-ribosyl)imidazole-4-carboxamido)succinate AMP-lyase (fumarate-forming) activity|N6-(1,2-dicarboxyethyl)AMP AMP-lyase (fumarate-forming) activity|'de novo' AMP biosynthetic process|'de novo' IMP biosynthetic process|purine nucleotide biosynthetic process	ko00230,ko00250	Purine metabolism|Alanine, aspartate and glutamate metabolism
LOC115709561	grey60	0.244772	0.170376	0.127025	0.224723	2.04036	3.43752	2.2835	2.95562			Uncharacterized leucine-rich repeat-containing protein C926.06c	GeneID:115709561	GO:0005737,GO:0005829,GO:0000329,GO:0005634,GO:0019901,GO:0005200	cytoplasm|cytosol|fungal-type vacuole membrane|nucleus|protein kinase binding|structural constituent of cytoskeleton
LOC115709562	grey60	0.0157878	0	0.0354771	0	0.882301	1.18793	0.773065	1.18624		At4g19890	Pentatricopeptide repeat-containing protein At4g19890	GeneID:115709562
LOC115709570	grey60	0	0	0	0	0.983924	1.42205	1.11556	1.38385	SURF1	At3g17910	Surfeit locus protein 1	GeneID:115709570	GO:0016021,GO:0005743,GO:0005739	integral component of membrane|mitochondrial inner membrane|mitochondrion
LOC115709812	grey60	2.10819	1.45294	1.69142	1.44691	3.09678	3.60563	2.9692	3.55042	RPPL1	At3g14470	Putative disease resistance RPP13-like protein 1	GeneID:115709812
LOC115709813	grey60	1.40336	1.21588	1.27069	1.22338	2.33761	3.23449	2.37772	2.97485	RPPL1	At3g14470	Putative disease resistance RPP13-like protein 1	GeneID:115709813
LOC115709818	grey60	5.24462	4.84581	5.06005	4.87904	6.54053	6.50771	5.94025	5.96598	RER4	At5g12470	Protein RETICULATA-RELATED 4, chloroplastic	GeneID:115709818	GO:0009507,GO:0009941,GO:0009706,GO:0016021,GO:0005739,GO:0009536,GO:0007275	chloroplast|chloroplast envelope|chloroplast inner membrane|integral component of membrane|mitochondrion|plastid|multicellular organism development
LOC115710016	grey60	0.196145	0.318253	0.480681	0.0776721	2.80678	2.66907	1.93759	2.19436				GeneID:115710016
LOC115710023	grey60	0	0	0	0	1.91449	2.77391	1.88232	2.27406	Y-3	At3g17950	Uncharacterized protein At3g17950	GeneID:115710023
LOC115710029	grey60	0.193568	0.161304	0.12465	0.14541	3.28419	5.19738	5.15658	4.56083			Probable aspartyl aminopeptidase	GeneID:115710029	GO:0005737,GO:0004177,GO:0008237,GO:0008270	cytoplasm|aminopeptidase activity|metallopeptidase activity|zinc ion binding
LOC115710063	grey60	0.0676932	0.126438	0.0613987	0.038955	1.008	1.45154	1.19563	1.27817	PAP27	At5g50400	Probable inactive purple acid phosphatase 27	GeneID:115710063	GO:0005576,GO:0003993,GO:0046872	extracellular region|acid phosphatase activity|metal ion binding
LOC115710227	grey60	5.35876	4.67752	5.38932	4.96145	6.18215	6.83232	7.11267	6.5333			Peptide methionine sulfoxide reductase	GeneID:115710227	GO:0008113	peptide-methionine (S)-S-oxide reductase activity
LOC115710301	grey60	5.65977	5.39291	5.27485	5.52906	6.73479	7.17717	6.74231	6.10569			Thioredoxin M-type Md	GeneID:115710301	GO:0009507,GO:0015035,GO:0045454,GO:0006662	chloroplast|protein disulfide oxidoreductase activity|cell redox homeostasis|glycerol ether metabolic process
LOC115710530	grey60	0.603368	0.580171	0.082352	0.714556	1.90007	2.13892	2.62288	1.65195				GeneID:115710530
LOC115710913	grey60	1.90888	2.1634	1.22979	1.43263	2.71426	2.51422	3.10624	1.75826	NPF73	At1g32450	Protein NRT1/ PTR FAMILY 7.3	GeneID:115710913	GO:0016021,GO:0005886,GO:0015112,GO:0015386,GO:0015293,GO:0010150,GO:0015706,GO:0055075,GO:1902600,GO:0010167	integral component of membrane|plasma membrane|nitrate transmembrane transporter activity|potassium:proton antiporter activity|symporter activity|leaf senescence|nitrate transport|potassium ion homeostasis|proton transmembrane transport|response to nitrate
LOC115710946	grey60	1.94259	1.76396	1.25658	1.40985	3.69796	2.87168	3.14311	3.15986				GeneID:115710946
LOC115711347	grey60	0.346064	0.167442	0.336701	0.102384	1.95586	2.02627	1.63896	2.75383				GeneID:115711347
LOC115711370	grey60	0.300867	0.0548941	0	0	1.05309	1.902	1.2465	1.45972	PAP27	At5g50400	Probable inactive purple acid phosphatase 27	GeneID:115711370	GO:0005576,GO:0003993,GO:0046872	extracellular region|acid phosphatase activity|metal ion binding
LOC115711542	grey60	0.629318	0.172679	0.930017	0.529327	3.38879	3.37478	2.78015	3.81928			Polygalacturonase	GeneID:115711542	GO:0005618,GO:0005576,GO:0004650,GO:0005975,GO:0071555,GO:0009835	cell wall|extracellular region|polygalacturonase activity|carbohydrate metabolic process|cell wall organization|fruit ripening	ko00040	Pentose and glucuronate interconversions
LOC115711578	grey60	0.260914	0.0373795	0.0398862	0.0663424	0.842918	0.262446	1.50588	0.369754				GeneID:115711578
LOC115711999	grey60	0.223894	0.30697	0.250866	0.428025	1.81907	2.16213	1.38919	2.02812	HAT	At3g42170	Zinc finger BED domain-containing protein DAYSLEEPER	GeneID:115711999	GO:0005829,GO:0005634,GO:0003677,GO:0046872,GO:0046983,GO:0009791	cytosol|nucleus|DNA binding|metal ion binding|protein dimerization activity|post-embryonic development
LOC115712047	grey60	0.527799	0.467624	0.627743	0.66996	2.0757	2.0974	2.98701	1.95605	EXL3	At1g75900	GDSL esterase/lipase EXL3	GeneID:115712047	GO:0005576,GO:0016298,GO:0016042	extracellular region|lipase activity|lipid catabolic process
LOC115712092	grey60	1.35073	1.7922	1.90433	1.6818	2.89427	1.31386	2.19576	2.50262	SHH1	At1g15215	Protein SAWADEE HOMEODOMAIN HOMOLOG 1	GeneID:115712092	GO:0005634,GO:0003682,GO:0046872,GO:0006306,GO:0031047,GO:0006346	nucleus|chromatin binding|metal ion binding|DNA methylation|gene silencing by RNA|methylation-dependent chromatin silencing
LOC115712133	grey60	1.46287	1.21973	1.60144	2.10969	3.20612	3.45386	3.40779	3.26731				GeneID:115712133
LOC115712165	grey60	1.96554	1.79391	1.70793	2.13007	3.51108	3.08098	4.30075	3.11733	SABP2	LOC107791137	Salicylic acid-binding protein 2	GeneID:115712165	GO:0016298,GO:0080031,GO:0009862	lipase activity|methyl salicylate esterase activity|systemic acquired resistance, salicylic acid mediated signaling pathway
LOC115712236	grey60	0.147409	0.0799437	0	0.29847	3.86466	2.55008	3.02439	3.13661		At3g49725	GTP-binding protein At3g49725, chloroplastic	GeneID:115712236	GO:0009507,GO:0005737,GO:0005525,GO:0046872,GO:0043022	chloroplast|cytoplasm|GTP binding|metal ion binding|ribosome binding
LOC115712262	grey60	4.66682	4.13342	4.06748	4.502	5.64818	5.72565	5.34897	5.0414				GeneID:115712262
LOC115712311	grey60	5.40381	5.2227	5.50759	5.78415	7.57046	6.58429	6.58002	7.28115		At4g32940	Vacuolar-processing enzyme gamma-isozyme	GeneID:115712311	GO:0000323,GO:0000326,GO:0004197,GO:0004175,GO:0010150,GO:0051603,GO:0009723,GO:0009753,GO:0009751,GO:0009611,GO:0006624	lytic vacuole|protein storage vacuole|cysteine-type endopeptidase activity|endopeptidase activity|leaf senescence|proteolysis involved in cellular protein catabolic process|response to ethylene|response to jasmonic acid|response to salicylic acid|response to wounding|vacuolar protein processing
LOC115712319	grey60	0	0	0	0	2.23364	2.82742	3.07531	2.35766				GeneID:115712319
LOC115712349	grey60	0.349976	0.563407	0.615815	0.587608	2.32634	1.94184	2.3954	1.80126		At1g06620	1-aminocyclopropane-1-carboxylate oxidase homolog 1	GeneID:115712349	GO:0046872,GO:0016491	metal ion binding|oxidoreductase activity
LOC115712382	grey60	0.173361	0.183009	0.635713	1.68829	1.43509	0.854181	2.41201	1.37234	CHI9		Basic 30 kDa endochitinase	GeneID:115712382	GO:0005618,GO:0005576,GO:0005773,GO:0008061,GO:0004568,GO:0016998,GO:0006032,GO:0006952,GO:0000272	cell wall|extracellular region|vacuole|chitin binding|chitinase activity|cell wall macromolecule catabolic process|chitin catabolic process|defense response|polysaccharide catabolic process	ko00520,ko04016	Amino sugar and nucleotide sugar metabolism|MAPK signaling pathway - plant
LOC115712389	grey60	1.3451	1.01424	1.36089	1.08089	2.39868	3.01171	2.3916	2.50402	PMAT1	At5g39050	Phenolic glucoside malonyltransferase 1	GeneID:115712389	GO:0005829,GO:0050736,GO:0009636	cytosol|O-malonyltransferase activity|response to toxic substance
LOC115712392	grey60	1.90962	0.48166	0.531645	0.026729	0.874612	1.77556	1.65556	1.21141	DLO1	At4g10500	Protein DMR6-LIKE OXYGENASE 1	GeneID:115712392	GO:0051213,GO:0046872,GO:0002229,GO:0010150,GO:0009617,GO:0009620,GO:0002239,GO:0009751,GO:0046244	dioxygenase activity|metal ion binding|defense response to oomycetes|leaf senescence|response to bacterium|response to fungus|response to oomycetes|response to salicylic acid|salicylic acid catabolic process
LOC115712431	grey60	3.39438	3.52969	3.04435	3.36286	4.9396	4.87883	5.1507	4.81617	PLP3	At4g37050	Patatin-like protein 3	GeneID:115712431	GO:0005737,GO:0047372,GO:0004620,GO:0006952,GO:0016042,GO:0009737	cytoplasm|acylglycerol lipase activity|phospholipase activity|defense response|lipid catabolic process|response to abscisic acid
LOC115712530	grey60	0.0238853	0.474075	0.272309	0.344233	1.28227	0.343484	1.93564	1.14642	PLP1	At4g37070	Patatin-like protein 1	GeneID:115712530	GO:0005737,GO:0047372,GO:0004620,GO:0006952,GO:0010311,GO:0016042	cytoplasm|acylglycerol lipase activity|phospholipase activity|defense response|lateral root formation|lipid catabolic process
LOC115712630	grey60	0	0	0.0186186	0	1.63294	1.57577	1.28796	1.97142		At1g60420	Probable nucleoredoxin 1	GeneID:115712630	GO:0005829,GO:0047134,GO:0045454,GO:0009860,GO:0010183,GO:0080092,GO:0046686	cytosol|protein-disulfide reductase activity|cell redox homeostasis|pollen tube growth|pollen tube guidance|regulation of pollen tube growth|response to cadmium ion
LOC115712633	grey60	1.96818	1.42479	2.28701	1.62878	4.82784	3.76398	4.28368	5.1539		At1g60420	Probable nucleoredoxin 1	GeneID:115712633	GO:0005829,GO:0047134,GO:0045454,GO:0009860,GO:0010183,GO:0080092,GO:0046686	cytosol|protein-disulfide reductase activity|cell redox homeostasis|pollen tube growth|pollen tube guidance|regulation of pollen tube growth|response to cadmium ion
LOC115712719	grey60	0.66149	0.0955399	0.475059	0.0859329	3.69522	3.54298	4.64231	3.59842	CEQORH	At4g13010	Chloroplast envelope quinone oxidoreductase homolog	GeneID:115712719	GO:0009507,GO:0009941,GO:0009706,GO:0009535,GO:0005886,GO:0005773,GO:0016491	chloroplast|chloroplast envelope|chloroplast inner membrane|chloroplast thylakoid membrane|plasma membrane|vacuole|oxidoreductase activity	ko00592	alpha-Linolenic acid metabolism
LOC115712720	grey60	0.178811	0.0564921	0.089463	0	2.85431	3.12409	4.0335	2.93514	CEQORH	At4g13010	Chloroplast envelope quinone oxidoreductase homolog	GeneID:115712720	GO:0009507,GO:0009941,GO:0009706,GO:0009535,GO:0005886,GO:0005773,GO:0016491	chloroplast|chloroplast envelope|chloroplast inner membrane|chloroplast thylakoid membrane|plasma membrane|vacuole|oxidoreductase activity	ko00592	alpha-Linolenic acid metabolism
LOC115712746	grey60	1.92829	1.71362	2.7995	2.85903	4.7537	3.2395	6.57099	4.59812	SBT17	At5g67360	Subtilisin-like protease SBT1.7	GeneID:115712746	GO:0048046,GO:0005618,GO:0005576,GO:0009505,GO:0004252,GO:0080001,GO:0048359,GO:0010214	apoplast|cell wall|extracellular region|plant-type cell wall|serine-type endopeptidase activity|mucilage extrusion from seed coat|mucilage metabolic process involved in seed coat development|seed coat development
LOC115712779	grey60	5.14918	4.72741	4.69406	4.95662	6.09386	5.35096	5.36874	6.09229				GeneID:115712779
LOC115712781	grey60	7.88817	7.39698	7.38178	7.40264	8.38322	8.5607	8.52055	8.03608		At1g67360	REF/SRPP-like protein At1g67360	GeneID:115712781	GO:0005783,GO:0005811,GO:0005773,GO:0080186,GO:0034389,GO:0009555,GO:0045927,GO:1902584	endoplasmic reticulum|lipid droplet|vacuole|developmental vegetative growth|lipid droplet organization|pollen development|positive regulation of growth|positive regulation of response to water deprivation
LOC115712847	grey60	5.0799	4.77447	5.16061	5.05128	7.447	6.45099	6.38094	6.62223	CAD		Probable mannitol dehydrogenase	GeneID:115712847	GO:0046029,GO:0008270	mannitol dehydrogenase activity|zinc ion binding
LOC115712912	grey60	0.427727	0.224931	0.328002	0.234444	3.85478	4.45492	5.31893	4.15137	FKBP65	At5g48570	Peptidyl-prolyl cis-trans isomerase FKBP65	GeneID:115712912	GO:0005737,GO:0005634,GO:0005773,GO:0005516,GO:0005528,GO:0003755,GO:0070370,GO:0061077,GO:0000413	cytoplasm|nucleus|vacuole|calmodulin binding|FK506 binding|peptidyl-prolyl cis-trans isomerase activity|cellular heat acclimation|chaperone-mediated protein folding|protein peptidyl-prolyl isomerization
LOC115712937	grey60	0.0986026	0.0355899	0.0931342	0.0160605	2.18911	2.2165	3.49973	2.54344	MEBL	At4g27870	Membrane protein of ER body-like protein	GeneID:115712937	GO:0005783,GO:0005789,GO:0010168,GO:0016021,GO:0016020,GO:0005381,GO:0005384,GO:0030026,GO:0006880	endoplasmic reticulum|endoplasmic reticulum membrane|ER body|integral component of membrane|membrane|iron ion transmembrane transporter activity|manganese ion transmembrane transporter activity|cellular manganese ion homeostasis|intracellular sequestering of iron ion
LOC115712942	grey60	0.349491	1.2574	0.258036	0.219571	1.7765	2.05409	2.94986	1.92302	gpi17		GPI transamidase component PIG-S homolog	GeneID:115712942	GO:0005783,GO:0042765,GO:0016255	endoplasmic reticulum|GPI-anchor transamidase complex|attachment of GPI anchor to protein	ko00563	Glycosylphosphatidylinositol (GPI)-anchor biosynthesis
LOC115712945	grey60	0.85668	0.683736	1.14085	0.895719	3.94356	4.02738	4.88046	4.17449	CYCL1-1	At2g26430	Cyclin-L1-1	GeneID:115712945	GO:0000307,GO:0005634,GO:0009506,GO:0016538,GO:0051301,GO:0051321,GO:0045737,GO:1901409,GO:0045944,GO:0006355,GO:0009651	cyclin-dependent protein kinase holoenzyme complex|nucleus|plasmodesma|cyclin-dependent protein serine/threonine kinase regulator activity|cell division|meiotic cell cycle|positive regulation of cyclin-dependent protein serine/threonine kinase activity|positive regulation of phosphorylation of RNA polymerase II C-terminal domain|positive regulation of transcription by RNA polymerase II|regulation…
LOC115712947	grey60	0.920549	0.792116	1.04769	1.14776	2.16604	1.52581	2.69638	1.39969	FATA	At3g25110	Oleoyl-acyl carrier protein thioesterase 1, chloroplastic	GeneID:115712947	GO:0009507,GO:0016297,GO:0016295,GO:0004320,GO:0016296,GO:0006633	chloroplast|acyl-[acyl-carrier-protein] hydrolase activity|myristoyl-[acyl-carrier-protein] hydrolase activity|oleoyl-[acyl-carrier-protein] hydrolase activity|palmitoyl-[acyl-carrier-protein] hydrolase activity|fatty acid biosynthetic process	ko00061	Fatty acid biosynthesis
LOC115712951	grey60	2.83136	2.63936	2.48895	2.25629	3.03625	2.86344	3.69874	3.78101	RIN4	At3g25070	RPM1-interacting protein 4	GeneID:115712951	GO:0012505,GO:0019897,GO:0016020,GO:0005886,GO:0010204,GO:0009816,GO:0034051,GO:0009626,GO:0006468,GO:0002237	endomembrane system|extrinsic component of plasma membrane|membrane|plasma membrane|defense response signaling pathway, resistance gene-independent|defense response to bacterium, incompatible interaction|negative regulation of plant-type hypersensitive response|plant-type hypersensitive response|protein phosphorylation|response to molecule of bacterial origin	ko04626	Plant-pathogen interaction
LOC115712956	grey60	3.0686	2.70958	3.08472	2.9332	4.31214	4.44112	5.63134	4.4546				GeneID:115712956
LOC115712963	grey60	4.31146	4.28241	4.28244	4.15792	5.59594	4.21492	4.95263	5.08128	RPT2A	At4g29040	26S proteasome regulatory subunit 4 homolog A	GeneID:115712963	GO:0005737,GO:0016020,GO:0005634,GO:0000502,GO:0008540,GO:0005524,GO:0036402,GO:0017025,GO:0007292,GO:0045087,GO:0010311,GO:0009965,GO:0010078,GO:0048232,GO:0035266,GO:0009933,GO:0048827,GO:0043248,GO:0043161,GO:0060968,GO:0046686,GO:0009408,GO:0051788,GO:0048829,GO:0048364,GO:0010015,GO:0090351,GO:0048367	cytoplasm|membrane|nucleus|proteasome complex|proteasome regulatory particle, base subcomplex|ATP binding|proteasome-activating ATPase activity|TBP-class protein binding|female gamete generation|innate immune response|lateral root formation|leaf morphogenesis|maintenance of root meristem identity|male gamete generation|meristem growth|meristem structural organization|phyllome development|proteaso…	ko03050	Proteasome
LOC115713183	grey60	5.08259	4.22421	4.96908	4.9191	5.98867	5.66875	5.25693	4.83295		At1g48100	Polygalacturonase At1g48100	GeneID:115713183	GO:0005618,GO:0005576,GO:0004650,GO:0005975,GO:0009831	cell wall|extracellular region|polygalacturonase activity|carbohydrate metabolic process|plant-type cell wall modification involved in multidimensional cell growth
LOC115713494	grey60	0.575008	0.0906338	0.272309	0	1.22055	0.0981559	1.8507	1.21598				GeneID:115713494
LOC115713842	grey60	3.79387	2.5646	2.81646	1.60252	3.7729	4.81906	4.02952	3.41866	CYP82G1	At3g25180	Dimethylnonatriene synthase	GeneID:115713842	GO:0016021,GO:0016020,GO:0097008,GO:0097007,GO:0020037,GO:0005506,GO:0016709,GO:0006952,GO:0042343,GO:0046246,GO:0016114	integral component of membrane|membrane|(3E)-4,8-dimethyl-1,3,7-nonatriene synthase activity|4,8,12-trimethyltrideca-1,3,7,11-tetraene synthase activity|heme binding|iron ion binding|oxidoreductase activity,acting on paired donors, with incorporation or reduction of molecular oxygen, NAD(P)H as one donor, and incorporation of one atom of oxygen|defense response|indole glucosinolate metabolic proc…	ko00904	Diterpenoid biosynthesis
LOC115713851	grey60	0	0	0	0	0.682443	0.810771	1.36205	0.543139		At3g17540	Putative F-box/kelch-repeat protein At3g17540	GeneID:115713851
LOC115713856	grey60	0	0.165334	0	0	1.15307	1.20405	1.7857	1.23354				GeneID:115713856
LOC115713922	grey60	4.11965	4.36284	4.07308	4.22632	5.22655	4.75811	4.75209	5.40507		At1g67340	F-box protein At1g67340	GeneID:115713922	GO:0005634,GO:0016567	nucleus|protein ubiquitination
LOC115714101	grey60	0.406036	0.338963	0.13619	0.130886	1.9271	1.7661	2.65145	1.93076	MHK	At4g13020	Serine/threonine-protein kinase MHK	GeneID:115714101	GO:0005737,GO:0005634,GO:0005524,GO:0004693,GO:0004674,GO:0035556,GO:0010468	cytoplasm|nucleus|ATP binding|cyclin-dependent protein serine/threonine kinase activity|protein serine/threonine kinase activity|intracellular signal transduction|regulation of gene expression
LOC115714235	grey60	3.91333	3.70434	3.72142	3.7777	5.21344	4.5927	4.55758	4.81066				GeneID:115714235
LOC115714307	grey60	3.8559	3.66301	3.30565	3.69576	4.48039	4.13113	4.55449	4.77658				GeneID:115714307
LOC115714384	grey60	0.372934	0.129269	0.415444	0.134924	2.69296	1.96382	2.25359	2.42653	CYP71P1	Os12g0268000	Tryptamine 5-hydroxylase	GeneID:115714384	GO:0005789,GO:0016021,GO:0016020,GO:0020037,GO:0005506,GO:0004497,GO:0016709,GO:0006952,GO:0006587	endoplasmic reticulum membrane|integral component of membrane|membrane|heme binding|iron ion binding|monooxygenase activity|oxidoreductase activity,acting on paired donors, with incorporation or reduction of molecular oxygen, NAD(P)H as one donor, and incorporation of one atom of oxygen|defense response|serotonin biosynthetic process from tryptophan
LOC115714433	grey60	4.01955	3.84383	4.09943	3.96916	5.14946	5.49868	5.05208	4.39737	PPH	At5g13800	Pheophytinase, chloroplastic	GeneID:115714433	GO:0009507,GO:0009570,GO:0009535,GO:0080124,GO:0015996	chloroplast|chloroplast stroma|chloroplast thylakoid membrane|pheophytinase activity|chlorophyll catabolic process
LOC115714451	grey60	1.36575	1.51238	1.95869	1.70484	3.04423	2.3845	2.25017	2.77812				GeneID:115714451
LOC115714469	grey60	2.08685	2.24318	0.779887	2.13265	3.38197	2.43816	3.00908	3.25136				GeneID:115714469
LOC115714653	grey60	0.684985	0.466182	0.384645	0.657205	1.22575	1.66655	2.22092	1.50348				GeneID:115714653
LOC115714796	grey60	0.0890512	0	0.0510442	0.0429649	1.38986	1.43439	1.87159	1.79527	A6	At4g14080	Probable glucan endo-1,3-beta-glucosidase A6	GeneID:115714796	GO:0046658,GO:0042973,GO:0005975,GO:0006952,GO:0009793,GO:0010584	anchored component of plasma membrane|glucan endo-1,3-beta-D-glucosidase activity|carbohydrate metabolic process|defense response|embryo development ending in seed dormancy|pollen exine formation
LOC115714992	grey60	1.53376	0.933099	0.660107	0.700104	2.21648	1.76472	1.63516	2.38021	CYP82D61		Demethylepipodophyllotoxin synthase	GeneID:115714992	GO:0016021,GO:0016020,GO:0020037,GO:0005506,GO:0004497,GO:0016709,GO:0071281,GO:0042343	integral component of membrane|membrane|heme binding|iron ion binding|monooxygenase activity|oxidoreductase activity,acting on paired donors, with incorporation or reduction of molecular oxygen, NAD(P)H as one donor, and incorporation of one atom of oxygen|cellular response to iron ion|indole glucosinolate metabolic process
LOC115715011	grey60	1.3029	0.97195	1.32489	1.23019	2.40477	1.91083	1.76115	2.2701	FAAH	At5g64440	Fatty acid amide hydrolase	GeneID:115715011	GO:0005783,GO:0005789,GO:0005794,GO:0016021,GO:0005886,GO:0005774,GO:0005773,GO:0004040,GO:0103073,GO:0047412,GO:0102077,GO:0042742,GO:0070291	endoplasmic reticulum|endoplasmic reticulum membrane|Golgi apparatus|integral component of membrane|plasma membrane|vacuolar membrane|vacuole|amidase activity|anandamide amidohydrolase activity|N-(long-chain-acyl)ethanolamine deacylase activity|oleamide hydrolase activity|defense response to bacterium|N-acylethanolamine metabolic process
LOC115715192	grey60	5.42161	4.82589	4.62518	5.56084	6.08784	6.03212	5.63259	5.42299	NIC2	At5g23230	Nicotinamidase 2	GeneID:115715192	GO:0008936,GO:0019674,GO:0019363	nicotinamidase activity|NAD metabolic process|pyridine nucleotide biosynthetic process
LOC115715272	grey60	0	0.025364	0	0	2.62562	1.48084	2.35442	2.00964	CYP94A2		Cytochrome P450 94A2	GeneID:115715272	GO:0005789,GO:0016021,GO:0020037,GO:0005506,GO:0004497,GO:0016705	endoplasmic reticulum membrane|integral component of membrane|heme binding|iron ion binding|monooxygenase activity|oxidoreductase activity, acting on paired donors, with incorporation or reduction of molecular oxygen	ko00073	Cutin, suberine and wax biosynthesis
LOC115715289	grey60	0.049218	0.243428	0.0555564	0.0467745	2.86241	3.14788	4.3345	3.31219	FKBP15		FK506-binding protein 2	GeneID:115715289	GO:0005788,GO:0003755	endoplasmic reticulum lumen|peptidyl-prolyl cis-trans isomerase activity
LOC115715290	grey60	3.05511	3.06936	3.09123	3.20984	4.39514	3.02508	4.05626	3.68924	PLP3B	At5g66410	Thioredoxin domain-containing protein PLP3B	GeneID:115715290	GO:0005737,GO:0005874,GO:0005634,GO:0048487,GO:0051211,GO:0045454,GO:0043622,GO:0000911,GO:0000280,GO:0007000	cytoplasm|microtubule|nucleus|beta-tubulin binding|anisotropic cell growth|cell redox homeostasis|cortical microtubule organization|cytokinesis by cell plate formation|nuclear division|nucleolus organization
LOC115715307	grey60	1.71975	1.10903	0.95277	1.42713	2.9302	3.00961	2.71628	2.57698	CYP71B34	At3g26300	Cytochrome P450 71B34	GeneID:115715307	GO:0016021,GO:0016020,GO:0020037,GO:0005506,GO:0016709	integral component of membrane|membrane|heme binding|iron ion binding|oxidoreductase activity,acting on paired donors, with incorporation or reduction of molecular oxygen, NAD(P)H as one donor, and incorporation of one atom of oxygen
LOC115715659	grey60	3.90501	3.7403	3.51885	3.24761	4.93595	4.04504	4.72649	4.54319	CYP76B6		Geraniol 8-hydroxylase	GeneID:115715659	GO:0005789,GO:0016021,GO:0020037,GO:0005506,GO:0016709,GO:0016099	endoplasmic reticulum membrane|integral component of membrane|heme binding|iron ion binding|oxidoreductase activity,acting on paired donors, with incorporation or reduction of molecular oxygen, NAD(P)H as one donor, and incorporation of one atom of oxygen|monoterpenoid biosynthetic process
LOC115715661	grey60	3.51387	2.92397	3.31418	3.46652	4.01596	3.97533	4.27462	4.34177		At4g22758	Uncharacterized protein At4g22758	GeneID:115715661
LOC115715720	grey60	0.865883	0.511188	0.625502	0.771108	5.68685	0.569738	3.47848	4.30642		At5g24080	G-type lectin S-receptor-like serine/threonine-protein kinase At5g24080	GeneID:115715720
LOC115715721	grey60	1.42023	1.07708	1.15362	1.06646	3.81383	2.48004	3.70601	2.9874				GeneID:115715721
LOC115715731	grey60	2.45064	3.30092	2.82404	3.0101	5.40812	4.76124	5.62221	5.10011		At3g14820	GDSL esterase/lipase At3g14820	GeneID:115715731	GO:0005576,GO:0016298,GO:0016042	extracellular region|lipase activity|lipid catabolic process
LOC115715771	grey60	3.79679	3.811	3.67077	3.67781	4.92255	5.04369	4.73013	4.46973				GeneID:115715771
LOC115715790	grey60	0.140443	0.0309158	0.127677	0.133675	2.91192	0	1.56801	2.12265	BCAT1		Branched-chain amino acid aminotransferase 1, mitochondrial	GeneID:115715790	GO:0005739,GO:0052656,GO:0052654,GO:0052655,GO:0009097,GO:0009098,GO:0009099	mitochondrion|L-isoleucine transaminase activity|L-leucine transaminase activity|L-valine transaminase activity|isoleucine biosynthetic process|leucine biosynthetic process|valine biosynthetic process	ko00270,ko00280,ko00290,ko00770,ko00966	Cysteine and methionine metabolism|Valine, leucine and isoleucine degradation|Valine, leucine and isoleucine biosynthesis|Pantothenate and CoA biosynthesis|Glucosinolate biosynthesis
LOC115715811	grey60	0	0	0.5114	0.726538	0.895582	0.0808937	1.95402	0.934576	TPS10		Terpene synthase 10	GeneID:115715811	GO:0000287,GO:0010334,GO:0051762	magnesium ion binding|sesquiterpene synthase activity|sesquiterpene biosynthetic process
LOC115715837	grey60	3.00239	2.42436	2.36475	3.59314	4.54591	2.98349	3.99656	3.58556				GeneID:115715837
LOC115715873	grey60	0.0191146	0	0	0	1.44573	0.0219638	0.675472	0.771943	LRK10L-21	At5g38260	LEAF RUST 10 DISEASE-RESISTANCE LOCUS RECEPTOR-LIKE PROTEIN KINASE-like 2.1	GeneID:115715873
LOC115715875	grey60	0.292621	0.35935	0.0889499	0.40084	0.974221	0.841632	1.68252	1.18285	LRK10		Rust resistance kinase Lr10	GeneID:115715875	GO:0016021,GO:0005886,GO:0005524,GO:0004674	integral component of membrane|plasma membrane|ATP binding|protein serine/threonine kinase activity
LOC115715914	grey60	2.32367	2.02415	2.36449	3.08631	4.69796	2.59074	4.6197	4.17744	EXPB2	At1g65680	Putative expansin-B2	GeneID:115715914
LOC115715985	grey60	2.74198	3.07346	3.03715	2.93076	5.94785	5.3015	5.48319	5.62532	CID12	At4g10610	Polyadenylate-binding protein-interacting protein 12	GeneID:115715985	GO:0005634,GO:0000166,GO:0003723	nucleus|nucleotide binding|RNA binding
LOC115716021	grey60	5.00439	4.64653	4.936	4.84171	5.89838	5.39547	5.8377	5.85563				GeneID:115716021
LOC115716024	grey60	2.78204	4.15937	3.32497	3.01484	4.61279	4.56071	5.21519	4.00941	NPF73	At1g32450	Protein NRT1/ PTR FAMILY 7.3	GeneID:115716024	GO:0016021,GO:0005886,GO:0015112,GO:0015386,GO:0015293,GO:0010150,GO:0015706,GO:0055075,GO:1902600,GO:0010167	integral component of membrane|plasma membrane|nitrate transmembrane transporter activity|potassium:proton antiporter activity|symporter activity|leaf senescence|nitrate transport|potassium ion homeostasis|proton transmembrane transport|response to nitrate
LOC115716049	grey60	4.09132	3.65315	3.70284	3.84904	5.08641	5.09717	5.21706	4.95138		Os03g0216600	Probable glucan 1,3-alpha-glucosidase	GeneID:115716049	GO:0005783,GO:0030246,GO:0033919,GO:0005975,GO:0006952	endoplasmic reticulum|carbohydrate binding|glucan 1,3-alpha-glucosidase activity|carbohydrate metabolic process|defense response
LOC115716101	grey60	3.61665	4.23353	3.39276	3.00446	5.21002	4.66069	3.6061	3.46676	BAM3	At4g17090	Beta-amylase 3, chloroplastic	GeneID:115716101	GO:0009570,GO:0102229,GO:0016161,GO:0000024,GO:0009409,GO:0005983	chloroplast stroma|amylopectin maltohydrolase activity|beta-amylase activity|maltose biosynthetic process|response to cold|starch catabolic process	ko00500	Starch and sucrose metabolism
LOC115716136	grey60	2.38979	2.56558	2.53981	2.53819	3.45532	3.86052	3.63411	3.59086	OMA1	YKR087C	Mitochondrial metalloendopeptidase OMA1	GeneID:115716136	GO:0016021,GO:0005743,GO:0046872,GO:0004222,GO:0035694,GO:0006515,GO:0031929	integral component of membrane|mitochondrial inner membrane|metal ion binding|metalloendopeptidase activity|mitochondrial protein catabolic process|protein quality control for misfolded or incompletely synthesized proteins|TOR signaling
LOC115716190	grey60	2.85782	3.01706	3.21242	2.91417	4.53171	3.59918	3.64807	3.96753	PKP2	At5g52920	Plastidial pyruvate kinase 2	GeneID:115716190	GO:0009507,GO:0009570,GO:0005737,GO:0005739,GO:0005524,GO:0016301,GO:0000287,GO:0030955,GO:0004743,GO:0032869,GO:0006633,GO:0006096,GO:0006629,GO:0046686,GO:0048316,GO:0010431	chloroplast|chloroplast stroma|cytoplasm|mitochondrion|ATP binding|kinase activity|magnesium ion binding|potassium ion binding|pyruvate kinase activity|cellular response to insulin stimulus|fatty acid biosynthetic process|glycolytic process|lipid metabolic process|response to cadmium ion|seed development|seed maturation	ko00010,ko00230,ko00620	Glycolysis / Gluconeogenesis|Purine metabolism|Pyruvate metabolism
LOC115716233	grey60	8.3809	8.53712	8.0928	7.88623	9.5242	9.90583	9.21237	9.57392	HSP70-4	At3g12580	Heat shock 70 kDa protein 4	GeneID:115716233			ko03040,ko04141,ko04144	Spliceosome|Protein processing in endoplasmic reticulum|Endocytosis
LOC115716238	grey60	3.13793	3.03443	3.2333	3.13013	4.06652	4.43096	4.40704	4.16391		At1g29470	Probable methyltransferase PMT24	GeneID:115716238	GO:0005768,GO:0005794,GO:0000139,GO:0016021,GO:0005802,GO:0008757,GO:0052546	endosome|Golgi apparatus|Golgi membrane|integral component of membrane|trans-Golgi network|S-adenosylmethionine-dependent methyltransferase activity|cell wall pectin metabolic process
LOC115716246	grey60	3.62238	3.39634	3.45895	3.61329	4.55755	3.17025	4.6559	3.80554	FAX4	At1g33265	Protein FATTY ACID EXPORT 4, chloroplastic	GeneID:115716246	GO:0031969,GO:0016021	chloroplast membrane|integral component of membrane
LOC115716293	grey60	2.40479	2.65833	2.51451	2.92032	4.29463	4.47907	3.94306	4.13357	PMEI10	At1g62760	Pectinesterase inhibitor 10	GeneID:115716293	GO:0048046,GO:0004857,GO:0046910,GO:0043086,GO:0071669	apoplast|enzyme inhibitor activity|pectinesterase inhibitor activity|negative regulation of catalytic activity|plant-type cell wall organization or biogenesis
LOC115716295	grey60	3.27839	3.0689	3.24568	3.69059	4.66303	5.45401	4.68925	4.70371			21 kDa protein	GeneID:115716295	GO:0004857	enzyme inhibitor activity
LOC115716296	grey60	3.57613	3.64202	3.61701	3.92109	5.74049	4.72409	4.62873	5.58443	PMEI7	At4g25260	Pectinesterase inhibitor 7	GeneID:115716296	GO:0048046,GO:0004857,GO:0043086,GO:0009641	apoplast|enzyme inhibitor activity|negative regulation of catalytic activity|shade avoidance
LOC115716311	grey60	0.194853	0.342621	0.243718	0.582799	2.08621	3.04181	1.90443	2.59536	GMT1	At3g55830	Glycosylinositol phosphorylceramide mannosyl transferase 1	GeneID:115716311
LOC115716342	grey60	2.54529	2.65666	2.5232	2.49509	3.78826	3.09694	3.30163	3.64179		At4g00755	F-box protein At4g00755	GeneID:115716342
LOC115716405	grey60	0.544517	0.609924	2.69819	1.78369	4.76767	3.3588	3.75675	3.45589			Myrcene synthase, chloroplastic	GeneID:115716405	GO:0031969,GO:0016021,GO:0000287,GO:0050551,GO:0016114	chloroplast membrane|integral component of membrane|magnesium ion binding|myrcene synthase activity|terpenoid biosynthetic process
LOC115716432	grey60	0	0	0	0	3.0336	2.88511	2.70522	2.95741	MT1		Sphingolipid C9-methyltransferase 1	GeneID:115716432	GO:0016021,GO:0008168,GO:0008610,GO:0006665	integral component of membrane|methyltransferase activity|lipid biosynthetic process|sphingolipid metabolic process
LOC115716475	grey60	2.00952	1.50012	1.94303	1.80292	2.76606	2.38307	2.91452	2.76554	IPK2b	At5g61760	Inositol polyphosphate multikinase beta	GeneID:115716475	GO:0005634,GO:0090406,GO:0005524,GO:0000824,GO:0047326,GO:0051765,GO:0051766,GO:0052725,GO:0000823,GO:0019900,GO:0102732,GO:0009793,GO:0010264,GO:0009555,GO:0010183,GO:0006355,GO:0009749	nucleus|pollen tube|ATP binding|inositol tetrakisphosphate 3-kinase activity|inositol tetrakisphosphate 5-kinase activity|inositol tetrakisphosphate kinase activity|inositol trisphosphate kinase activity|inositol-1,3,4-trisphosphate 6-kinase activity|inositol-1,4,5-trisphosphate 6-kinase activity|kinase binding|myo-inositol-1,2,3,4,6-heptakisphosphate 5-kinase activity|embryo development ending i…	ko00562,ko04070	Inositol phosphate metabolism|Phosphatidylinositol signaling system
LOC115716478	grey60	0.0575368	0	0	0	2.55752	0	1.9835	1.67739				GeneID:115716478
LOC115716577	grey60	0	0	0.0685105	0	3.52036	1.93299	4.13126	3.27803	PLR_Lu2		Bifunctional pinoresinol-lariciresinol reductase 2	GeneID:115716577	GO:0010284,GO:0010283,GO:1902132,GO:1902131,GO:1902125,GO:1902138,GO:0009807	lariciresinol reductase activity|pinoresinol reductase activity|(+)-lariciresinol biosynthetic process|(+)-lariciresinol catabolic process|(+)-pinoresinol catabolic process|(-)-secoisolariciresinol biosynthetic process|lignan biosynthetic process	ko00998	Biosynthesis of various secondary metabolites - part 2
LOC115716578	grey60	0	0	0	0.0940179	2.24233	1.12614	2.65638	1.81071	PLR_Lu2		Bifunctional pinoresinol-lariciresinol reductase 2	GeneID:115716578	GO:0010284,GO:0010283,GO:1902132,GO:1902131,GO:1902125,GO:1902138,GO:0009807	lariciresinol reductase activity|pinoresinol reductase activity|(+)-lariciresinol biosynthetic process|(+)-lariciresinol catabolic process|(+)-pinoresinol catabolic process|(-)-secoisolariciresinol biosynthetic process|lignan biosynthetic process	ko00998	Biosynthesis of various secondary metabolites - part 2
LOC115716646	grey60	6.43	6.32135	5.62139	5.85862	7.70799	7.17812	6.36059	5.71501		At5g39865	Uncharacterized protein At5g39865	GeneID:115716646	GO:0005886,GO:0009055,GO:0015035,GO:0045454	plasma membrane|electron transfer activity|protein disulfide oxidoreductase activity|cell redox homeostasis
LOC115716684	grey60	4.92699	4.79799	4.39572	4.55606	5.73527	5.86331	5.16733	4.572	SIGE	At5g24120	RNA polymerase sigma factor sigE, chloroplastic/mitochondrial	GeneID:115716684	GO:0009507,GO:0005739,GO:0003677,GO:0003700,GO:0016987,GO:0071483,GO:0071472,GO:0009658,GO:0006352,GO:0009553,GO:0010207,GO:0045893,GO:2001141,GO:0010218,GO:0010114	chloroplast|mitochondrion|DNA binding|DNA-binding transcription factor activity|sigma factor activity|cellular response to blue light|cellular response to salt stress|chloroplast organization|DNA-templated transcription, initiation|embryo sac development|photosystem II assembly|positive regulation of transcription, DNA-templated|regulation of RNA biosynthetic process|response to far red light|res…
LOC115716689	grey60	3.05902	2.9086	3.41005	3.18812	4.01942	4.39056	3.52778	4.52253	XBAT33	At5g07270	E3 ubiquitin-protein ligase XBAT33	GeneID:115716689	GO:0046872,GO:0004842,GO:0016567	metal ion binding|ubiquitin-protein transferase activity|protein ubiquitination
LOC115716717	grey60	1.86313	0.561981	0.804107	0.822554	4.10596	4.3317	2.64848	4.92838	TLP		Thaumatin-like protein	GeneID:115716717
LOC115716733	grey60	3.07193	3.52884	3.31618	3.47674	4.6986	4.23074	3.95328	4.16464	UNE10	At4g00050	Transcription factor UNE10	GeneID:115716733	GO:0005634,GO:0009506,GO:0003677,GO:0003700,GO:0046983,GO:0009567,GO:0006355	nucleus|plasmodesma|DNA binding|DNA-binding transcription factor activity|protein dimerization activity|double fertilization forming a zygote and endosperm|regulation of transcription, DNA-templated
LOC115716757	grey60	2.159	0.924073	1.72008	1.7188	2.99817	2.63852	2.76624	2.68326	SWEET3B	Os01g0220700	Bidirectional sugar transporter SWEET3b	GeneID:115716757	GO:0005887,GO:0051119	integral component of plasma membrane|sugar transmembrane transporter activity
LOC115716781	grey60	2.70946	2.70167	2.92092	2.91041	4.02044	4.87619	4.5489	3.852				GeneID:115716781
LOC115716785	grey60	3.4845	3.36031	3.60307	4.06141	4.55307	5.0431	4.03038	4.84806	ERG3		Elicitor-responsive protein 3	GeneID:115716785
LOC115716787	grey60	3.64438	3.05646	3.55809	3.05989	4.35725	4.7067	4.80191	4.31692	BOU	At5g46800	Mitochondrial carnitine/acylcarnitine carrier-like protein	GeneID:115716787	GO:0009507,GO:0016021,GO:0005743,GO:0005739,GO:0009536,GO:0000064,GO:1990575,GO:0006839	chloroplast|integral component of membrane|mitochondrial inner membrane|mitochondrion|plastid|L-ornithine transmembrane transporter activity|mitochondrial L-ornithine transmembrane transport|mitochondrial transport
LOC115716805	grey60	0.0764536	0.602961	1.02237	0.859104	1.9901	0.871379	2.88527	1.60649	TPS10		Terpene synthase 10	GeneID:115716805	GO:0000287,GO:0010334,GO:0051762	magnesium ion binding|sesquiterpene synthase activity|sesquiterpene biosynthetic process
LOC115716806	grey60	0.087288	0.0534626	0.0287951	0	1.05685	0.340801	1.52984	0.907171	TPS10		Terpene synthase 10	GeneID:115716806	GO:0000287,GO:0010334,GO:0051762	magnesium ion binding|sesquiterpene synthase activity|sesquiterpene biosynthetic process
LOC115716817	grey60	0.722721	0.802344	1.06266	1.47423	3.07192	2.70817	1.87576	3.14907	EXPB2	At1g65680	Putative expansin-B2	GeneID:115716817
LOC115716819	grey60	0.0474378	0.0502004	0.0535511	0.0227167	2.27588	2.07398	3.06895	2.30477	mug105		Ubiquitin carboxyl-terminal hydrolase mug105	GeneID:115716819	GO:0005737,GO:1990380,GO:0036459,GO:0051321	cytoplasm|Lys48-specific deubiquitinase activity|thiol-dependent ubiquitinyl hydrolase activity|meiotic cell cycle
LOC115716837	grey60	4.14608	3.91942	3.6784	3.60168	4.69199	4.75235	4.94688	4.51766				GeneID:115716837
LOC115716856	grey60	3.05277	2.95529	2.88504	2.85298	3.72241	2.33364	3.78167	3.82568	LRK10		Rust resistance kinase Lr10	GeneID:115716856	GO:0016021,GO:0005886,GO:0005524,GO:0004674	integral component of membrane|plasma membrane|ATP binding|protein serine/threonine kinase activity
LOC115716862	grey60	2.63505	2.49214	2.88926	3.07274	4.17858	3.56997	4.65046	3.64801				GeneID:115716862
LOC115716867	grey60	3.28735	2.81785	3.14771	2.94649	4.78657	3.10657	3.83881	3.85803		At5g10920	Argininosuccinate lyase, chloroplastic	GeneID:115716867	GO:0009507,GO:0009570,GO:0005737,GO:0005829,GO:0004056,GO:0042450	chloroplast|chloroplast stroma|cytoplasm|cytosol|argininosuccinate lyase activity|arginine biosynthetic process via ornithine	ko00220,ko00250	Arginine biosynthesis|Alanine, aspartate and glutamate metabolism
LOC115716910	grey60	0.660961	0.625073	0.451905	0.682004	2.69871	0.570852	1.9666	2.03777	PMIR1	At5g20610	Protein PLASTID MOVEMENT IMPAIRED 1-RELATED 1	GeneID:115716910	GO:0005737,GO:0030048,GO:0009903,GO:0009902,GO:0031022,GO:0009637	cytoplasm|actin filament-based movement|chloroplast avoidance movement|chloroplast relocation|nuclear migration along microfilament|response to blue light
LOC115716971	grey60	9.99892	9.84631	10.4081	10.7163	11.66	11.6456	11.48	10.9832	RBCS		Ribulose bisphosphate carboxylase small chain, chloroplastic	GeneID:115716971	GO:0009507,GO:0004497,GO:0016984,GO:0009853,GO:0019253	chloroplast|monooxygenase activity|ribulose-bisphosphate carboxylase activity|photorespiration|reductive pentose-phosphate cycle	ko00630,ko00710	Glyoxylate and dicarboxylate metabolism|Carbon fixation in photosynthetic organisms
LOC115717018	grey60	1.57128	1.8121	1.14671	0.871417	1.90333	2.0256	2.28391	2.20301	MYB2		Transcription factor MYB1	GeneID:115717018
LOC115717020	grey60	1.39429	1.06373	1.21163	1.17112	2.48255	1.97952	1.47423	2.07276	PCMP-E34	At1g28690	Pentatricopeptide repeat-containing protein At1g28690, mitochondrial	GeneID:115717020
LOC115717027	grey60	0	0	0	0	0.642832	0.509301	1.25363	1.40454				GeneID:115717027
LOC115717080	grey60	1.98148	1.58158	2.09107	1.93566	2.85354	3.76235	3.38633	2.78917	NFD4	At1g31470	Protein NUCLEAR FUSION DEFECTIVE 4	GeneID:115717080	GO:0016021,GO:0005739,GO:0000741,GO:0010197,GO:0009651	integral component of membrane|mitochondrion|karyogamy|polar nucleus fusion|response to salt stress
LOC115717087	grey60	1.65623	1.73419	1.2445	1.55431	2.70898	2.85072	2.58924	2.46899				GeneID:115717087
LOC115717101	grey60	3.75201	3.24138	3.79482	3.93491	4.97111	5.42535	5.05315	4.71556	PLGG1	At1g32080	Plastidal glycolate/glycerate translocator 1, chloroplastic	GeneID:115717101	GO:0009507,GO:0009941,GO:0009706,GO:0016021,GO:0016020,GO:1901974,GO:0043879,GO:0009658,GO:1901975,GO:0097339,GO:0009853	chloroplast|chloroplast envelope|chloroplast inner membrane|integral component of membrane|membrane|glycerate transmembrane transporter activity|glycolate transmembrane transporter activity|chloroplast organization|glycerate transmembrane transport|glycolate transmembrane transport|photorespiration
LOC115717164	grey60	5.74308	5.73177	5.60504	5.55888	7.09519	6.69053	7.09017	6.30103				GeneID:115717164
LOC115717189	grey60	4.81939	5.08744	4.59307	4.68037	5.96441	5.34143	5.84982	5.62456				GeneID:115717189
LOC115717205	grey60	0	0	0	0	1.50148	0	1.13011	0.911333				GeneID:115717205
LOC115717255	grey60	0.0274785	0.0290904	0.0614404	0.0261045	6.79789	0	4.62434	6.00431	MTL2		Probable caffeine synthase MTL2	GeneID:115717255	GO:0046872,GO:0008168,GO:0009820	metal ion binding|methyltransferase activity|alkaloid metabolic process
LOC115717268	grey60	0.149925	0.0166391	0.035311	0.0731255	2.18035	1.82041	1.89781	1.86658	OPT7	At4g10770	Oligopeptide transporter 7	GeneID:115717268	GO:0005887,GO:0016020,GO:0035673,GO:0015031	integral component of plasma membrane|membrane|oligopeptide transmembrane transporter activity|protein transport
LOC115717341	grey60	2.7755	2.49879	2.26959	2.23309	3.31006	3.68555	3.4838	3.1969				GeneID:115717341
LOC115717353	grey60	1.08761	0.422814	1.04319	1.15126	4.18283	0.421114	4.85197	4.12951			Acidic endochitinase	GeneID:115717353	GO:0005615,GO:0004568,GO:0006032,GO:0000272	extracellular space|chitinase activity|chitin catabolic process|polysaccharide catabolic process	ko00520	Amino sugar and nucleotide sugar metabolism
LOC115717359	grey60	3.11607	2.95559	3.05618	3.07933	4.18519	4.07199	4.01177	3.64217	STN8	At5g01920	Serine/threonine-protein kinase STN8, chloroplastic	GeneID:115717359	GO:0009507,GO:0009534,GO:0009579,GO:0005524,GO:0004672,GO:0004674,GO:0042549	chloroplast|chloroplast thylakoid|thylakoid|ATP binding|protein kinase activity|protein serine/threonine kinase activity|photosystem II stabilization
LOC115717395	grey60	1.15271	1.08612	1.29461	1.01869	3.08517	2.93735	2.80506	3.04457	FLS		Flavonol synthase/flavanone 3-hydroxylase	GeneID:115717395	GO:0005737,GO:0031418,GO:0046872,GO:0045486,GO:0009813	cytoplasm|L-ascorbic acid binding|metal ion binding|naringenin 3-dioxygenase activity|flavonoid biosynthetic process	ko00941	Flavonoid biosynthesis
LOC115717421	grey60	7.88159	7.41189	7.64616	8.02591	8.68449	9.20349	8.76261	8.4881	THI1		Thiamine thiazole synthase, chloroplastic	GeneID:115717421	GO:0009570,GO:0005829,GO:0046872,GO:0009228,GO:0052837	chloroplast stroma|cytosol|metal ion binding|thiamine biosynthetic process|thiazole biosynthetic process	ko00730	Thiamine metabolism
LOC115717437	grey60	1.64306	1.77218	2.07741	1.85341	2.95359	3.17217	3.54627	3.29842	SPL8	At1g02065	Squamosa promoter-binding-like protein 8	GeneID:115717437	GO:0005737,GO:0005634,GO:0003677,GO:0046872,GO:0048653,GO:0030154,GO:0009554,GO:0009556	cytoplasm|nucleus|DNA binding|metal ion binding|anther development|cell differentiation|megasporogenesis|microsporogenesis
LOC115717451	grey60	2.49093	2.74963	2.68754	2.60433	5.63491	4.40211	4.13871	4.95308	OSM34	At4g11650	Osmotin-like protein OSM34	GeneID:115717451	GO:0009816,GO:0009817,GO:0009651	defense response to bacterium, incompatible interaction|defense response to fungus, incompatible interaction|response to salt stress
LOC115717592	grey60	0.523881	0.609373	0.481542	1.0572	2.64199	1.38485	2.7589	2.13214				GeneID:115717592
LOC115717608	grey60	0	0	0	0	1.66147	0.554368	0.89362	1.55766	PCRK1	At3g09830	Serine/threonine-protein kinase PCRK1	GeneID:115717608	GO:0005886,GO:0005524,GO:0004672,GO:0042742,GO:0052033,GO:0002221,GO:0080142,GO:0009617	plasma membrane|ATP binding|protein kinase activity|defense response to bacterium|pathogen-associated molecular pattern dependent induction by symbiont of host innate immune response|pattern recognition receptor signaling pathway|regulation of salicylic acid biosynthetic process|response to bacterium
LOC115717628	grey60	4.75966	4.34591	3.8693	4.07749	5.72324	5.30394	4.95915	4.37906	RITF1	At2g12646	Protein RGF1 INDUCIBLE TRANSCRIPTION FACTOR 1	GeneID:115717628
LOC115717774	grey60	1.41927	1.54052	1.67777	1.56258	3.79078	2.56785	3.40908	3.28822	GLC1		Glucan endo-1,3-beta-glucosidase	GeneID:115717774	GO:0042973,GO:0005975,GO:0006952	glucan endo-1,3-beta-D-glucosidase activity|carbohydrate metabolic process|defense response
LOC115718038	grey60	0.431661	0.127453	0.259769	0.870241	2.31897	3.14125	2.01681	2.6382				GeneID:115718038
LOC115718065	grey60	0.289303	0.041805	0.0878702	0.307081	2.07272	1.63555	2.75673	1.9498				GeneID:115718065
LOC115718149	grey60	3.07447	3.23186	3.24575	3.2135	4.76576	4.36189	4.45619	4.5665	RRP45A	At3g12990	Exosome complex component RRP45A	GeneID:115718149	GO:0005737,GO:0000177,GO:0000176,GO:0005634,GO:0000175,GO:0017091,GO:0043928,GO:0000467,GO:0071028,GO:0071042,GO:0071035,GO:0071038,GO:0034427,GO:0016075,GO:0034473,GO:0034475,GO:0034476	cytoplasm|cytoplasmic exosome (RNase complex)|nuclear exosome (RNase complex)|nucleus|3'-5'-exoribonuclease activity|AU-rich element binding|exonucleolytic nuclear-transcribed mRNA catabolic process involved in deadenylation-dependent decay|exonucleolytic trimming to generate mature 3'-end of 5.8S rRNA from tricistronic rRNA transcript (SSU-rRNA, 5.8S rRNA, LSU-rRNA)|nuclear mRNA surveillance|nuc…	ko03018	RNA degradation
LOC115718150	grey60	0	0	0	0	1.41916	1.31988	0.889403	1.01617			Endonuclease	GeneID:115718150	GO:0000943,GO:0004190,GO:0004519,GO:0003676,GO:0003964,GO:0008270,GO:0015074	retrotransposon nucleocapsid|aspartic-type endopeptidase activity|endonuclease activity|nucleic acid binding|RNA-directed DNA polymerase activity|zinc ion binding|DNA integration
LOC115718564	grey60	3.56107	2.41522	2.57572	2.66415	4.51855	5.07782	4.63142	3.85848	ndhN	At5g58260	NAD(P)H-quinone oxidoreductase subunit N, chloroplastic	GeneID:115718564	GO:0009507,GO:0009941,GO:0009535,GO:0010598,GO:0016655,GO:0048038,GO:0009817,GO:0010258	chloroplast|chloroplast envelope|chloroplast thylakoid membrane|NAD(P)H dehydrogenase complex (plastoquinone)|oxidoreductase activity, acting on NAD(P)H, quinone or similar compound as acceptor|quinone binding|defense response to fungus, incompatible interaction|NADH dehydrogenase complex (plastoquinone) assembly
LOC115718599	grey60	3.71141	1.78182	1.69074	3.3785	4.52565	3.78951	4.85041	3.78569	ACA7	At1g08080	Alpha carbonic anhydrase 7	GeneID:115718599	GO:0009570,GO:0004089,GO:0008270	chloroplast stroma|carbonate dehydratase activity|zinc ion binding	ko00910	Nitrogen metabolism
LOC115718739	grey60	0	0	0	0.0190104	3.41945	3.2282	3.49971	3.33414	bms1		Ribosome biogenesis protein bms1	GeneID:115718739	GO:0030686,GO:0005739,GO:0072686,GO:0005730,GO:0005634,GO:0005524,GO:0005525,GO:0003924,GO:0034511,GO:0000462,GO:0042255,GO:0006364	90S preribosome|mitochondrion|mitotic spindle|nucleolus|nucleus|ATP binding|GTP binding|GTPase activity|U3 snoRNA binding|maturation of SSU-rRNA from tricistronic rRNA transcript (SSU-rRNA, 5.8S rRNA, LSU-rRNA)|ribosome assembly|rRNA processing	ko03008	Ribosome biogenesis in eukaryotes
LOC115718740	grey60	3.80788	3.94321	3.15215	3.58943	5.60394	6.00636	4.93448	5.05195	HSP17.5-M		17.5 kDa class I heat shock protein	GeneID:115718740	GO:0005737,GO:0043621,GO:0051082,GO:0051259,GO:0006457,GO:0009408,GO:0042542,GO:0000302,GO:0009651	cytoplasm|protein self-association|unfolded protein binding|protein complex oligomerization|protein folding|response to heat|response to hydrogen peroxide|response to reactive oxygen species|response to salt stress	ko04141	Protein processing in endoplasmic reticulum
LOC115718819	grey60	1.39957	0.59852	1.52987	1.2173	3.94827	5.76058	5.99943	4.07774		At5g39130	Germin-like protein subfamily 1 member 16	GeneID:115718819	GO:0048046,GO:0005618,GO:0030145,GO:0045735	apoplast|cell wall|manganese ion binding|nutrient reservoir activity
LOC115718852	grey60	2.48596	2.24532	1.81078	1.65173	3.08091	1.82793	2.85796	2.52336				GeneID:115718852
LOC115718862	grey60	3.03387	3.20871	2.98115	3.57933	4.81095	4.92828	3.66772	4.27084				GeneID:115718862
LOC115718871	grey60	0	0	0	0	2.18366	1.57989	1.46308	2.11527	PDC2	At5g54960	Pyruvate decarboxylase 2	GeneID:115718871	GO:0005829,GO:0005622,GO:0016831,GO:0000287,GO:0004737,GO:0030976,GO:0001666	cytosol|intracellular|carboxy-lyase activity|magnesium ion binding|pyruvate decarboxylase activity|thiamine pyrophosphate binding|response to hypoxia	ko00010	Glycolysis / Gluconeogenesis
LOC115719008	grey60	6.02854	5.98982	6.18744	6.18322	7.00448	7.37245	7.3483	7.12475	RD22	At5g25610	BURP domain protein RD22	GeneID:115719008	GO:0005768,GO:0005794,GO:0005802,GO:0009651	endosome|Golgi apparatus|trans-Golgi network|response to salt stress
LOC115719230	grey60	1.60909	1.60412	1.92616	1.79447	3.46346	3.21126	2.69471	3.09154	ACD223	At1g54850	Alpha-crystallin domain-containing protein 22.3	GeneID:115719230	GO:0005730,GO:0005634,GO:1901537	nucleolus|nucleus|positive regulation of DNA demethylation
LOC115719253	grey60	2.72337	2.57078	2.83575	3.16466	4.67895	4.72636	3.88976	4.29793	THIC	At2g29630	Phosphomethylpyrimidine synthase, chloroplastic	GeneID:115719253	GO:0009507,GO:0009570,GO:0009536,GO:0051539,GO:0080041,GO:0016830,GO:0051536,GO:0046872,GO:0019904,GO:0010266,GO:0009228,GO:0009229	chloroplast|chloroplast stroma|plastid|4 iron, 4 sulfur cluster binding|ADP-ribose pyrophosphohydrolase activity|carbon-carbon lyase activity|iron-sulfur cluster binding|metal ion binding|protein domain specific binding|response to vitamin B1|thiamine biosynthetic process|thiamine diphosphate biosynthetic process	ko00730	Thiamine metabolism
LOC115719302	grey60	1.64376	0.567829	1.05775	1.06713	2.62611	3.42971	2.358	2.03611	AMT1-2		Ammonium transporter 1 member 2	GeneID:115719302	GO:0005887,GO:0008519,GO:0072488,GO:0015696	integral component of plasma membrane|ammonium transmembrane transporter activity|ammonium transmembrane transport|ammonium transport	ko03018	RNA degradation
LOC115719331	grey60	1.01851	1.29209	1.76185	1.89359	3.59202	3.82352	4.25235	3.41698				GeneID:115719331
[truncated: 60 more rows]

## Sheet: lightgreen_71
Supplementary Table S6: Genes of module (XLS).
[truncated: 73 more rows]

[truncated: 7 more sheets: magenta_349, midnightblue_510, pink_109, purple_181, tan_90, turquoise_484, white_47]
