# Supplementary material for: Transcriptomic and metabolomic analyses reveal the differential accumulation of phenylpropanoids and terpenoids in hemp autotetraploid and its diploid progenitor
Source: BMC Plant Biol. 2023 Dec 5;23:616. doi: 10.1186/s12870-023-04630-z (PMC10696708; doi:10.1186/s12870-023-04630-z)
Supplement: Supplementary file 5 — Additional file 5: Supplementary Table S7. Correlation of polyploidy-altered TFs and metabolites (|PCC |> 0.917). [file 12870_2023_4630_MOESM5_ESM.xlsx]

## Sheet: Supplementary_Table_S7
Supplementary Table S7: correlation of polyploidy-altered TFs and metabolites (|PCC |> 0.917)(XLS).
category1	category2	Correlation	Pvalue	Type	Significance	AdjPvalue	red	TF family	TF	Bassolino et al., annotation
LOC115695722	Laurenobiolide	0.932141	0.000741996	Group	***	0.0218889	red	bHLH	BHLH123	CsbHLH105
LOC115695722	2-Hydroxycinnamic acid	0.923336	0.00106268	Group	**	0.0179565	red	bHLH	BHLH123	CsbHLH105
LOC115695722	(S)-3-Sulfonatolactate	0.933072	0.000712375	Group	***	0.0210151	red	bHLH	BHLH123	CsbHLH105
LOC115695722	Benzofuran	0.929293	0.000837548	Group	***	0.0155441	red	bHLH	BHLH123	CsbHLH105
LOC115695722	2',6'-Dihydroxy-4'-methoxyacetophenone	0.92493	0.000998982	Group	***	0.02947	red	bHLH	BHLH123	CsbHLH105
LOC115695722	Kanokoside A	0.918112	0.00128985	Group	**	0.0126835	red	bHLH	BHLH123	CsbHLH105
LOC115695722	20-hydroxy-LTE4	0.926335	0.000944974	Group	***	0.0139384	red	bHLH	BHLH123	CsbHLH105
LOC115695722	Cholesterol glucuronide	0.932991	0.000714914	Group	***	0.02109	red	bHLH	BHLH123	CsbHLH105
LOC115695722	10-Hydroxyloganin	0.962612	0.000127018	Group	***	0.00374702	red	bHLH	BHLH123	CsbHLH105
LOC115695722	Mangiferin	0.950996	0.000283494	Group	***	0.00557538	red	bHLH	BHLH123	CsbHLH105
LOC115695722	6''-O-Malonyldaidzin	0.952051	0.000265784	Group	***	0.00784062	red	bHLH	BHLH123	CsbHLH105
LOC115695722	Lactosamine	0.944104	0.000418505	Group	***	0.0123459	red	bHLH	BHLH123	CsbHLH105
LOC115695722	Polysorbate 20	0.923749	0.00104594	Group	**	0.0205702	red	bHLH	BHLH123	CsbHLH105
LOC115695722	3-Methoxy-4-hydroxyphenylglycol glucuronide	0.943286	0.000436875	Group	***	0.0128878	red	bHLH	BHLH123	CsbHLH105
LOC115695758	(S)-3-Sulfonatolactate	0.953607	0.000241033	Group	***	0.0142209	red	MYB	MYB113	CsMYB87
LOC115695758	Benzofuran	0.919868	0.00121029	Group	**	0.0155441	red	MYB	MYB113	CsMYB87
LOC115695758	Lisinopril	0.928397	0.000869195	Group	***	0.0128206	red	MYB	MYB113	CsMYB87
LOC115695758	Mangiferin	0.922322	0.00110453	Group	**	0.0162918	red	MYB	MYB113	CsMYB87
LOC115695758	6''-O-Malonyldaidzin	0.927877	0.000887917	Group	***	0.0130968	red	MYB	MYB113	CsMYB87
LOC115698730	Doxorubicin	0.953809	0.000237924	Group	***	0.00290156	red	YABBY	pyr-7
LOC115698730	D-Lysine	0.952032	0.000266093	Group	***	0.00515087	red	YABBY	pyr-7
LOC115698730	2-Amino-4-oxo-4-alpha-hydroxy-6-(erythro-1',2',3'-trihydroxypropyl)-5,6,7,8-tetrahydroxypterin	0.961453	0.000139082	Group	***	0.00598261	red	YABBY	pyr-7
LOC115698730	Mannan	0.932163	0.000741273	Group	***	0.0171118	red	YABBY	pyr-7
LOC115698730	cis,cis-Muconic acid	0.933762	0.000690924	Group	***	0.00679408	red	YABBY	pyr-7
LOC115698730	1,2-Bis(4-hydroxy-3-methoxyphenyl)ethylene	0.927423	0.000904466	Group	***	0.00767659	red	YABBY	pyr-7
LOC115698730	L-Pipecolic acid	0.933095	0.00071165	Group	***	0.012853	red	YABBY	pyr-7
LOC115698730	Mitomycin	0.944503	0.000409729	Group	***	0.004029	red	YABBY	pyr-7
LOC115698814	L-Asparagine	0.925255	0.000986303	Group	***	0.0581919	red	G2-like	MPH1
LOC115698814	Gamma-Linolenic acid	0.94186	0.000470153	Group	***	0.0201948	red	G2-like	MPH1
LOC115698814	Acetylcholine	0.953593	0.000241242	Group	***	0.0142333	red	G2-like	MPH1
LOC115698814	4-Dedimethylamine-4-oxo-anhydro-7-Cl-tetracycline	0.955494	0.000213098	Group	***	0.0125728	red	G2-like	MPH1
LOC115698814	LysoPC(20:4(8Z,11Z,14Z,17Z))	0.991694	1.42e-06	Group	***	8.4e-05	red	G2-like	MPH1
LOC115698814	Ricinoleic acid	0.945256	0.000393492	Group	***	0.023216	red	G2-like	MPH1
LOC115698814	o-Xylene	0.961152	0.000142329	Group	***	0.00839739	red	G2-like	MPH1
LOC115698814	LysoPC(20:4(5Z,8Z,11Z,14Z)/0:0)	0.990532	2.11e-06	Group	***	0.000124294	red	G2-like	MPH1
LOC115698928	Fenoprofen	0.919097	0.00124481	Group	**	0.0183609	red	NAC	NAC090
LOC115698928	Baicalin	0.991017	1.8e-06	Group	***	0.000106191	red	NAC	NAC090
LOC115698928	N-Phenyl-2-naphthylamine	0.919324	0.00123456	Group	**	0.0145679	red	NAC	NAC090
LOC115698978	Threonic acid	0.930087	0.000810135	Group	***	0.0195346	red	bZIP	BZIP43
LOC115698978	4-Hydroxy-2-oxoglutaric acid	0.931189	0.000773092	Group	***	0.0228062	red	bZIP	BZIP43
LOC115698978	PIP2(16:0/16:2(9Z,12Z))	0.965101	0.000103498	Group	***	0.00610639	red	bZIP	BZIP43
LOC115700517	Carnosol	0.951282	0.000278609	Group	***	0.00821897	red	ZF-HD	MIF2
LOC115700517	Harpagoside	0.962677	0.000126364	Group	***	0.00372775	red	ZF-HD	MIF2
LOC115700517	Gibberellin A14	0.975313	3.69e-05	Group	***	0.00108912	red	ZF-HD	MIF2
LOC115700517	ent-Copalyl diphosphate	0.956516	0.000198912	Group	***	0.00391194	red	ZF-HD	MIF2
LOC115700517	trans,trans-Farnesol	0.998394	1.03e-08	Group	***	6.11e-07	red	ZF-HD	MIF2
LOC115700517	Prostaglandin D3	0.956276	0.000202183	Group	***	0.00596439	red	ZF-HD	MIF2
LOC115700517	Eprosartan	0.933176	0.000709105	Group	***	0.0131137	red	ZF-HD	MIF2
LOC115700517	w Hydroxy testosterone	0.964908	0.000105209	Group	***	0.00310366	red	ZF-HD	MIF2
LOC115700517	Zonisamide	0.975511	3.6e-05	Group	***	0.00173718	red	ZF-HD	MIF2
LOC115700517	Imidazole acetol-phosphate	0.961911	0.00013423	Group	***	0.00395977	red	ZF-HD	MIF2
LOC115700517	19-Oxotestosterone	0.974506	4.06e-05	Group	***	0.00119883	red	ZF-HD	MIF2
LOC115700517	Gibberellin A44	0.986895	5.57e-06	Group	***	0.000305045	red	ZF-HD	MIF2
LOC115700517	3-Polyprenyl-4,5-dihydroxybenzoate	0.947765	0.000342489	Group	***	0.00673561	red	ZF-HD	MIF2
LOC115700564	Oxidized glutathione	0.954382	0.000229275	Group	***	0.0135272	red	G2-like	HHO2
LOC115700564	Mannan	0.931336	0.000768226	Group	***	0.0171118	red	G2-like	HHO2
LOC115700791	Laurenobiolide	0.921439	0.00114186	Group	**	0.0224567	red	bHLH	PRE6
LOC115700791	Gluconic acid	0.969024	7.26e-05	Group	***	0.00142752	red	bHLH	PRE6
LOC115700791	Artabsin	0.985652	7.31e-06	Group	***	0.000431032	red	bHLH	PRE6
LOC115700791	L-Sorbose	0.960136	0.000153679	Group	***	0.00906704	red	bHLH	PRE6
LOC115700791	Uridine 2',3'-cyclic phosphate	0.967002	8.76e-05	Group	***	0.00516931	red	bHLH	PRE6
LOC115700791	伪-D-Glucose	0.950341	0.000294869	Group	***	0.00434931	red	bHLH	PRE6
LOC115700791	Prenyl glucoside	0.973438	4.59e-05	Group	***	0.00270939	red	bHLH	PRE6
LOC115700791	Glabridin	0.974766	3.94e-05	Group	***	0.0023253	red	bHLH	PRE6
LOC115700791	Arbutin	0.97729	2.88e-05	Group	***	0.000849189	red	bHLH	PRE6
LOC115700791	Kievitone	0.919841	0.00121149	Group	**	0.0357389	red	bHLH	PRE6
LOC115700791	20-hydroxy-LTE4	0.961158	0.000142272	Group	***	0.00839407	red	bHLH	PRE6
LOC115700791	Irinotecan	0.964937	0.000104954	Group	***	0.00309615	red	bHLH	PRE6
LOC115700791	Polysorbate 20	0.93248	0.000731113	Group	***	0.0205702	red	bHLH	PRE6
LOC115700791	Pyridoxine 5'-phosphate	0.960774	0.000146486	Group	***	0.00864269	red	bHLH	PRE6
LOC115700935	similar to capsaicin	0.945713	0.000383858	Group	***	0.00490168	red	B3	VRN1
LOC115700935	Aesculin	0.971741	5.52e-05	Group	***	0.00325856	red	B3	VRN1
LOC115700935	4-Guanidinobutanoic acid	0.977635	2.75e-05	Group	***	0.000660148	red	B3	VRN1
LOC115700935	Kanokoside A	0.918183	0.00128659	Group	**	0.0126835	red	B3	VRN1
LOC115700935	Temocaprilat	0.921816	0.00112582	Group	**	0.0221411	red	B3	VRN1
LOC115700935	Galactonic acid	0.92814	0.00087842	Group	***	0.00863779	red	B3	VRN1
LOC115701526	Carnosol	0.980694	1.77e-05	Group	***	0.00104608	red	G2-like	PHR2
LOC115701526	Harpagoside	0.97824	2.53e-05	Group	***	0.00149514	red	G2-like	PHR2
LOC115701526	Gibberellin A14	0.992643	9.9e-07	Group	***	5.84e-05	red	G2-like	PHR2
LOC115701526	ent-Copalyl diphosphate	0.974338	4.14e-05	Group	***	0.00244496	red	G2-like	PHR2
LOC115701526	trans,trans-Farnesol	0.990252	2.3e-06	Group	***	6.78e-05	red	G2-like	PHR2
LOC115701526	Prostaglandin D3	0.979414	2.15e-05	Group	***	0.00126703	red	G2-like	PHR2
LOC115701526	Eprosartan	0.964039	0.000113144	Group	***	0.00667551	red	G2-like	PHR2
LOC115701526	w Hydroxy testosterone	0.983671	1.08e-05	Group	***	0.000634404	red	G2-like	PHR2
LOC115701526	Zonisamide	0.971126	5.89e-05	Group	***	0.00173718	red	G2-like	PHR2
LOC115701526	Imidazole acetol-phosphate	0.983909	1.03e-05	Group	***	0.000607082	red	G2-like	PHR2
LOC115701526	19-Oxotestosterone	0.986175	6.54e-06	Group	***	0.000385695	red	G2-like	PHR2
LOC115701526	Gibberellin A44	0.983883	1.03e-05	Group	***	0.000305045	red	G2-like	PHR2
LOC115701526	3-Polyprenyl-4,5-dihydroxybenzoate	0.966089	9.5e-05	Group	***	0.00371772	red	G2-like	PHR2
LOC115701526	6-Phosphonoglucono-D-lactone	0.948179	0.000334512	Group	***	0.0197362	red	G2-like	PHR2
LOC115701537	Orientin	0.9374	0.00058486	Group	***	0.0125017	red	MYB	MYB105
LOC115701537	Luteoloside	0.935465	0.000639816	Group	***	0.0171169	red	MYB	MYB105
LOC115701537	Succinic acid	0.934052	0.000682043	Group	***	0.0201203	red	MYB	MYB105
LOC115701537	Dehydrocurdione	0.922224	0.00110866	Group	**	0.0151625	red	MYB	MYB105
LOC115702108	Gluconic acid	0.945073	0.000397396	Group	***	0.00454941	red	MYB_related	KUA1
LOC115702108	L-Sorbose	0.929373	0.000834747	Group	***	0.0160485	red	MYB_related	KUA1
LOC115702108	Threonic acid	0.925076	0.000993285	Group	***	0.0195346	red	MYB_related	KUA1
LOC115702108	伪-D-Glucose	0.961336	0.00014034	Group	***	0.00329236	red	MYB_related	KUA1
LOC115702108	Arbutin	0.97103	5.95e-05	Group	***	0.00116954	red	MYB_related	KUA1
LOC115702108	Oxidized Latia luciferin	0.964321	0.000110531	Group	***	0.00652132	red	MYB_related	KUA1
LOC115702108	Irinotecan	0.937916	0.00057073	Group	***	0.00841826	red	MYB_related	KUA1
LOC115702108	PIP2(16:0/16:2(9Z,12Z))	0.926717	0.000930615	Group	***	0.0246295	red	MYB_related	KUA1
LOC115702108	Pyridoxine 5'-phosphate	0.92767	0.000895426	Group	***	0.0132075	red	MYB_related	KUA1
LOC115702338	Quercetin 3-galactoside	0.958995	0.000167105	Group	***	0.00985918	red	bHLH	BHLH80	CsbHLH83
LOC115702338	Nisoldipine	0.946064	0.000376569	Group	***	0.0222176	red	bHLH	BHLH80	CsbHLH83
LOC115702338	Iridodial glucoside tetraacetate	0.919407	0.00123085	Group	**	0.07262	red	bHLH	BHLH80	CsbHLH83
LOC115702338	Nicardipine	0.928883	0.000851939	Group	***	0.0251322	red	bHLH	BHLH80	CsbHLH83
LOC115702338	Tuberonic acid glucoside	0.978118	2.58e-05	Group	***	0.00152026	red	bHLH	BHLH80	CsbHLH83
LOC115702338	Isoquercitrin	0.937689	0.00057691	Group	***	0.0170188	red	bHLH	BHLH80	CsbHLH83
LOC115702338	Kaempferol	0.956603	0.000197729	Group	***	0.00583301	red	bHLH	BHLH80	CsbHLH83
LOC115702338	Thiamylal	0.961373	0.000139944	Group	***	0.00825669	red	bHLH	BHLH80	CsbHLH83
LOC115702338	Iridodial glucoside	0.986837	5.65e-06	Group	***	0.000333118	red	bHLH	BHLH80	CsbHLH83
LOC115702338	7-Epiloganin tetraacetate	0.974348	4.14e-05	Group	***	0.00244221	red	bHLH	BHLH80	CsbHLH83
LOC115702338	Neolinustatin	0.91883	0.00125691	Group	**	0.0741575	red	bHLH	BHLH80	CsbHLH83
LOC115702338	Melibiitol	0.932648	0.000725758	Group	***	0.0393803	red	bHLH	BHLH80	CsbHLH83
LOC115702833	Orientin	0.928233	0.000875055	Group	***	0.0129071	red	FAR1	FRS5
LOC115702833	Eprosartan	0.937452	0.000583411	Group	***	0.0131137	red	FAR1	FRS5
LOC115702833	Succinic acid	0.953207	0.000247232	Group	***	0.0145867	red	FAR1	FRS5
LOC115702833	Quinic acid	0.94161	0.000476136	Group	***	0.0143708	red	FAR1	FRS5
LOC115702833	3-Hydroxybenzyl alcohol glucoside	0.933747	0.000691395	Group	***	0.0203962	red	FAR1	FRS5
LOC115703790	2-Hydroxycinnamic acid	0.926685	0.000931821	Group	***	0.0179565	red	B3	NGA2
LOC115703790	similar to capsaicin	0.95006	0.000299824	Group	***	0.00490168	red	B3	NGA2
LOC115703790	Melilotoside	0.92396	0.00103744	Group	**	0.0135291	red	B3	NGA2
LOC115703790	Benzofuran	0.924593	0.00101225	Group	**	0.0155441	red	B3	NGA2
LOC115703790	4-Guanidinobutanoic acid	0.961021	0.000143765	Group	***	0.00169643	red	B3	NGA2
LOC115703790	Kanokoside A	0.959025	0.000166748	Group	***	0.00983814	red	B3	NGA2
LOC115703790	L-Tyrosine	0.92036	0.00118859	Group	**	0.0278985	red	B3	NGA2
LOC115703790	Temocaprilat	0.925532	0.000975593	Group	***	0.0221411	red	B3	NGA2
LOC115703790	Cucurbitacin Q	0.935173	0.00064842	Group	***	0.0192388	red	B3	NGA2
LOC115703790	Matairesinol	0.921526	0.00113817	Group	**	0.022384	red	B3	NGA2
LOC115703790	Galactonic acid	0.928426	0.000868167	Group	***	0.00863779	red	B3	NGA2
LOC115704023	Dehydrocurdione	0.925478	0.000977678	Group	***	0.0151625	red	bHLH	BHLH123
LOC115704050	3-propylmalic acid	0.931422	0.00076539	Group	***	0.010165	red	NAC	NTL9
LOC115704050	6-Methylmercaptopurine	0.933163	0.000709518	Group	***	0.0139539	red	NAC	NTL9
LOC115704050	Nimodipine	0.918149	0.00128816	Group	**	0.0168282	red	NAC	NTL9
LOC115704050	Spiramycin	0.970073	6.55e-05	Group	***	0.00193264	red	NAC	NTL9
LOC115704050	Mitomycin	0.960683	0.000147503	Group	***	0.0020277	red	NAC	NTL9
LOC115704832	Aflatoxin B2	0.939209	0.00053634	Group	***	0.010548	red	ERF	ERF023
LOC115704832	Spiramycin	0.932586	0.000727724	Group	***	0.00613367	red	ERF	ERF023
LOC115704832	Mitomycin	0.938042	0.000567318	Group	***	0.00424659	red	ERF	ERF023
LOC115704946	similar to capsaicin	0.9351	0.000650554	Group	***	0.00527335	red	MYB	MYB1
LOC115704946	Benzofuran	0.917771	0.00130567	Group	**	0.0155441	red	MYB	MYB1
LOC115704946	2',6'-Dihydroxy-4'-methoxyacetophenone	0.965634	9.89e-05	Group	***	0.00583327	red	MYB	MYB1
LOC115704946	Kanokoside A	0.930242	0.000804844	Group	***	0.0126835	red	MYB	MYB1
LOC115704946	2-Methyl-1-hydroxybutyl-ThPP	0.921592	0.00113532	Group	**	0.0392556	red	MYB	MYB1
LOC115704946	Cholesterol glucuronide	0.960789	0.000146319	Group	***	0.00863282	red	MYB	MYB1
LOC115704946	Cucurbitacin Q	0.925463	0.000978245	Group	***	0.0192388	red	MYB	MYB1
LOC115704946	Matairesinol	0.942189	0.000462337	Group	***	0.0136389	red	MYB	MYB1
LOC115704946	Lactosamine	0.971629	5.59e-05	Group	***	0.00329717	red	MYB	MYB1
LOC115705039	Fenoprofen	0.945485	0.000388641	Group	***	0.0114649	red	Trihelix	PTL
LOC115705039	Zederone	0.919315	0.00123498	Group	**	0.0182159	red	Trihelix	PTL
LOC115705039	Doxorubicin	0.983255	1.16e-05	Group	***	0.000683854	red	Trihelix	PTL
LOC115705039	8-oxoguanine	0.94285	0.000446879	Group	***	0.0121209	red	Trihelix	PTL
LOC115705039	2-Amino-4-oxo-4-alpha-hydroxy-6-(erythro-1',2',3'-trihydroxypropyl)-5,6,7,8-tetrahydroxypterin	0.952617	0.000256597	Group	***	0.00598261	red	Trihelix	PTL
LOC115705039	Mannan	0.917039	0.00134011	Group	**	0.0195864	red	Trihelix	PTL
LOC115705039	beta-Phellandrene	0.978018	2.61e-05	Group	***	0.00154102	red	Trihelix	PTL
LOC115705039	N-Phenyl-2-naphthylamine	0.95545	0.000213721	Group	***	0.00630478	red	Trihelix	PTL
LOC115705039	伪-Linolenoyl Ethanolamide	0.976243	3.29e-05	Group	***	0.00194274	red	Trihelix	PTL
LOC115705039	cis,cis-Muconic acid	0.957629	0.000184184	Group	***	0.00469484	red	Trihelix	PTL
LOC115705039	C.I. Natural Red 20	0.949612	0.000307869	Group	***	0.0078015	red	Trihelix	PTL
LOC115705039	Nimodipine	0.920259	0.00119299	Group	**	0.0168282	red	Trihelix	PTL
LOC115705039	Soyasapogenol C	0.948445	0.000329463	Group	***	0.00647943	red	Trihelix	PTL
LOC115705039	1,2-Bis(4-hydroxy-3-methoxyphenyl)ethylene	0.98099	1.69e-05	Group	***	0.000998975	red	Trihelix	PTL
LOC115705039	Pterostilbene	0.935133	0.000649589	Group	***	0.0127753	red	Trihelix	PTL
LOC115705039	Spiramycin	0.942832	0.000447294	Group	***	0.00613367	red	Trihelix	PTL
LOC115705039	3beta-hydroxy-4beta-methyl-5alpha-cholest-7-ene-4alpha-carbaldehyde	0.943161	0.000439723	Group	***	0.00864789	red	Trihelix	PTL
LOC115705039	Mitomycin	0.961802	0.000135376	Group	***	0.0020277	red	Trihelix	PTL
LOC115705736	15-Hydroxynorandrostene-3,17-dione glucuronide	0.944036	0.000420004	Group	***	0.0187162	red	GRAS	SCL6
LOC115705736	3-propylmalic acid	0.946102	0.000375789	Group	***	0.00739052	red	GRAS	SCL6
LOC115705736	Doxorubicin	0.939941	0.000517487	Group	***	0.00508862	red	GRAS	SCL6
LOC115705736	2-Amino-4-oxo-4-alpha-hydroxy-6-(erythro-1',2',3'-trihydroxypropyl)-5,6,7,8-tetrahydroxypterin	0.945309	0.00039238	Group	***	0.00598261	red	GRAS	SCL6
LOC115705736	beta-Phellandrene	0.929877	0.000817319	Group	***	0.0116621	red	GRAS	SCL6
LOC115705736	Neryl diphosphate	0.929212	0.000840377	Group	***	0.0417335	red	GRAS	SCL6
LOC115705736	伪-Linolenoyl Ethanolamide	0.948851	0.000321848	Group	***	0.00474726	red	GRAS	SCL6
LOC115705736	cis,cis-Muconic acid	0.954681	0.000224855	Group	***	0.00469484	red	GRAS	SCL6
LOC115705736	1,2-Bis(4-hydroxy-3-methoxyphenyl)ethylene	0.958643	0.000171403	Group	***	0.00505637	red	GRAS	SCL6
LOC115705736	Spiramycin	0.953293	0.000245901	Group	***	0.00483604	red	GRAS	SCL6
LOC115705736	Glaucarubin	0.932362	0.000734886	Group	***	0.0216791	red	GRAS	SCL6
LOC115705736	Mitomycin	0.986947	5.51e-06	Group	***	0.000162411	red	GRAS	SCL6
LOC115706127	D-Lysine	0.951879	0.000268626	Group	***	0.00515087	red	G2-like	IPN2
LOC115706127	2-Amino-4-oxo-4-alpha-hydroxy-6-(erythro-1',2',3'-trihydroxypropyl)-5,6,7,8-tetrahydroxypterin	0.928499	0.000865565	Group	***	0.0102137	red	G2-like	IPN2
LOC115706127	N-acetyl-LTE4	0.957928	0.000180349	Group	***	0.0106406	red	G2-like	IPN2
LOC115706127	L-Pipecolic acid	0.958118	0.000177943	Group	***	0.00524931	red	G2-like	IPN2
LOC115706598	Orientin	0.935607	0.00063568	Group	***	0.0125017	red	NAC	NTL9
LOC115706598	Luteoloside	0.925132	0.00099109	Group	***	0.0171169	red	NAC	NTL9
LOC115706598	Eprosartan	0.927845	0.000889062	Group	***	0.0131137	red	NAC	NTL9
LOC115706598	Zonisamide	0.928779	0.000855597	Group	***	0.0168267	red	NAC	NTL9
LOC115706598	3-Hydroxybenzyl alcohol glucoside	0.95729	0.000188593	Group	***	0.011127	red	NAC	NTL9
LOC115706613	(S)-(-)-Perillyl alcohol	0.930165	0.000807485	Group	***	0.0447949	red	WRKY	WRKY24
LOC115706613	4-(Glutamylamino) butanoate	0.957059	0.00019163	Group	***	0.0105575	red	WRKY	WRKY24
LOC115706613	S-Acetyldihydrolipoamide-E	0.962656	0.00012658	Group	***	0.00526654	red	WRKY	WRKY24
LOC115706613	Galangin 3-methyl ether	0.942718	0.000449944	Group	***	0.0265467	red	WRKY	WRKY24
LOC115706613	Aflatoxin B2	0.951459	0.000275618	Group	***	0.010548	red	WRKY	WRKY24
LOC115706613	Spiramycin	0.93571	0.000632689	Group	***	0.00613367	red	WRKY	WRKY24
LOC115706613	Mitomycin	0.923887	0.00104037	Group	**	0.00682018	red	WRKY	WRKY24
LOC115706763	Orientin	0.958561	0.000172418	Group	***	0.0101727	red	NF-YB	DPB4
LOC115706763	Luteoloside	0.962428	0.00012889	Group	***	0.00760449	red	NF-YB	DPB4
LOC115706763	Dehydrocurdione	0.936568	0.00060809	Group	***	0.0151625	red	NF-YB	DPB4
LOC115708825	Ondansetron	0.95661	0.000197641	Group	***	0.0116608	red	HSF	HSFB3
LOC115708825	LysoPC(20:4(5Z,8Z,11Z,14Z)/0:0)	0.926243	0.000948438	Group	***	0.0139895	red	HSF	HSFB3
LOC115708825	Arachidonic acid	0.953037	0.000249903	Group	***	0.0147443	red	HSF	HSFB3
LOC115708959	Gluconic acid	0.942175	0.000462652	Group	***	0.00454941	red	MYB	MYB90	CsMYB82
LOC115708959	Harpagoside	0.953424	0.000243854	Group	***	0.0047958	red	MYB	MYB90	CsMYB82
LOC115708959	Gibberellin A14	0.917775	0.00130548	Group	**	0.0256744	red	MYB	MYB90	CsMYB82
LOC115708959	ent-Copalyl diphosphate	0.960436	0.000150267	Group	***	0.00391194	red	MYB	MYB90	CsMYB82
LOC115708959	Prostaglandin D3	0.945078	0.000397298	Group	***	0.00781353	red	MYB	MYB90	CsMYB82
LOC115708959	伪-D-Glucose	0.960448	0.000150132	Group	***	0.00329236	red	MYB	MYB90	CsMYB82
LOC115708959	w Hydroxy testosterone	0.93757	0.000580186	Group	***	0.0114103	red	MYB	MYB90	CsMYB82
LOC115708959	Imidazole acetol-phosphate	0.933366	0.000703183	Group	***	0.0138293	red	MYB	MYB90	CsMYB82
LOC115708959	3-Polyprenyl-4,5-dihydroxybenzoate	0.962711	0.000126024	Group	***	0.00371772	red	MYB	MYB90	CsMYB82
LOC115708959	Irinotecan	0.958489	0.000173308	Group	***	0.00340839	red	MYB	MYB90	CsMYB82
LOC115708959	6-Phosphonoglucono-D-lactone	0.917299	0.00132782	Group	**	0.03407	red	MYB	MYB90	CsMYB82
LOC115708959	Pyridoxine 5'-phosphate	0.928064	0.000881155	Group	***	0.0132075	red	MYB	MYB90	CsMYB82
LOC115709155	4-Dedimethylamine-4-oxo-anhydro-7-Cl-tetracycline	0.923771	0.00104505	Group	**	0.0308291	red	WRKY	WRKY72A
LOC115709155	LysoPC(20:4(8Z,11Z,14Z,17Z))	0.97433	4.15e-05	Group	***	0.00122363	red	WRKY	WRKY72A
LOC115709155	Ricinoleic acid	0.922181	0.00111044	Group	**	0.0327581	red	WRKY	WRKY72A
LOC115709155	LysoPC(20:4(5Z,8Z,11Z,14Z)/0:0)	0.969397	7e-05	Group	***	0.00206548	red	WRKY	WRKY72A
LOC115709759	Crocin 4	0.958226	0.00017659	Group	***	0.0104188	red	ERF	ERN1
LOC115709759	Dihydrofolic acid	0.947065	0.000356264	Group	***	0.0210196	red	ERF	ERN1
LOC115711191	Fenoprofen	0.981823	1.48e-05	Group	***	0.000873821	red	C2H2	ZAT18
LOC115711191	ferulic acid	0.945734	0.000383417	Group	***	0.0113108	red	C2H2	ZAT18
LOC115711191	15-Hydroxynorandrostene-3,17-dione glucuronide	0.919689	0.00121825	Group	**	0.0187162	red	C2H2	ZAT18
LOC115711191	Messagenin	0.960794	0.00014627	Group	***	0.00431495	red	C2H2	ZAT18
LOC115711191	Zederone	0.956321	0.000201572	Group	***	0.0103041	red	C2H2	ZAT18
LOC115711191	Doxorubicin	0.953293	0.000245895	Group	***	0.00290156	red	C2H2	ZAT18
LOC115711191	8-oxoguanine	0.936279	0.000616319	Group	***	0.0121209	red	C2H2	ZAT18
LOC115711191	beta-Phellandrene	0.952752	0.000254427	Group	***	0.00500374	red	C2H2	ZAT18
LOC115711191	N-Phenyl-2-naphthylamine	0.977444	2.82e-05	Group	***	0.00166419	red	C2H2	ZAT18
LOC115711191	伪-Linolenoyl Ethanolamide	0.960057	0.00015458	Group	***	0.00456012	red	C2H2	ZAT18
LOC115711191	C.I. Natural Red 20	0.96374	0.00011597	Group	***	0.0068422	red	C2H2	ZAT18
LOC115711191	Soyasapogenol C	0.993624	6.45e-07	Group	***	3.8e-05	red	C2H2	ZAT18
LOC115711191	Pterostilbene	0.947081	0.000355941	Group	***	0.0127753	red	C2H2	ZAT18
LOC115711191	3beta-hydroxy-4beta-methyl-5alpha-cholest-7-ene-4alpha-carbaldehyde	0.994916	3.27e-07	Group	***	1.93e-05	red	C2H2	ZAT18
LOC115711324	Gluconic acid	0.978363	2.49e-05	Group	***	0.000735025	red	bHLH	PRE3
LOC115711324	伪-D-Glucose	0.934564	0.000666532	Group	***	0.00786507	red	bHLH	PRE3
LOC115711324	Arbutin	0.92972	0.000822745	Group	***	0.00970838	red	bHLH	PRE3
LOC115711324	Irinotecan	0.917834	0.00130274	Group	**	0.0153724	red	bHLH	PRE3
LOC115711395	L-Sorbose	0.922719	0.00108803	Group	**	0.0160485	red	NF-YA	NFYA9
LOC115711395	Uridine 2',3'-cyclic phosphate	0.925955	0.000959372	Group	***	0.0145937	red	NF-YA	NFYA9
LOC115711395	Aesculin	0.918173	0.00128703	Group	**	0.0109041	red	NF-YA	NFYA9
LOC115711395	Lisinopril	0.95614	0.000204051	Group	***	0.012039	red	NF-YA	NFYA9
LOC115711472	Gluconic acid	0.979968	1.98e-05	Group	***	0.000735025	red	bHLH	BHLH72	CsbHLH39
LOC115711472	Artabsin	0.954692	0.000224685	Group	***	0.00662822	red	bHLH	BHLH72	CsbHLH39
LOC115711472	L-Sorbose	0.946936	0.00035884	Group	***	0.0105858	red	bHLH	BHLH72	CsbHLH39
LOC115711472	Uridine 2',3'-cyclic phosphate	0.948427	0.000329807	Group	***	0.00972931	red	bHLH	BHLH72	CsbHLH39
LOC115711472	伪-D-Glucose	0.95897	0.000167408	Group	***	0.00329236	red	bHLH	BHLH72	CsbHLH39
LOC115711472	Prenyl glucoside	0.953005	0.000250413	Group	***	0.00650077	red	bHLH	BHLH72	CsbHLH39
LOC115711472	Glabridin	0.941455	0.000479902	Group	***	0.0117953	red	bHLH	BHLH72	CsbHLH39
LOC115711472	Arbutin	0.982045	1.43e-05	Group	***	0.000842285	red	bHLH	BHLH72	CsbHLH39
LOC115711472	20-hydroxy-LTE4	0.933074	0.000712303	Group	***	0.0139384	red	bHLH	BHLH72	CsbHLH39
LOC115711472	Oxidized Latia luciferin	0.942502	0.000454966	Group	***	0.0134215	red	bHLH	BHLH72	CsbHLH39
LOC115711472	Irinotecan	0.970592	6.22e-05	Group	***	0.00309615	red	bHLH	BHLH72	CsbHLH39
LOC115711472	Pyridoxine 5'-phosphate	0.946647	0.000364644	Group	***	0.010757	red	bHLH	BHLH72	CsbHLH39
LOC115711473	Laurenobiolide	0.977045	2.97e-05	Group	***	0.00175359	red	GRAS	RAD1
LOC115711473	Gluconic acid	0.958704	0.000170658	Group	***	0.0025172	red	GRAS	RAD1
LOC115711473	(S)-3-Sulfonatolactate	0.921898	0.00112236	Group	**	0.022073	red	GRAS	RAD1
LOC115711473	Prenyl glucoside	0.948388	0.000330547	Group	***	0.00650077	red	GRAS	RAD1
LOC115711473	Glabridin	0.936864	0.00059976	Group	***	0.0117953	red	GRAS	RAD1
LOC115711473	Arbutin	0.941934	0.000468383	Group	***	0.00690866	red	GRAS	RAD1
LOC115711473	Kievitone	0.927834	0.00088947	Group	***	0.0357389	red	GRAS	RAD1
LOC115711473	20-hydroxy-LTE4	0.948972	0.000319597	Group	***	0.0094281	red	GRAS	RAD1
LOC115711473	Mangiferin	0.951902	0.000268232	Group	***	0.00557538	red	GRAS	RAD1
LOC115711473	6''-O-Malonyldaidzin	0.967107	8.68e-05	Group	***	0.00512052	red	GRAS	RAD1
LOC115711473	Polysorbate 20	0.969552	6.9e-05	Group	***	0.00406905	red	GRAS	RAD1
LOC115711473	Pyridoxine 5'-phosphate	0.920406	0.00118654	Group	**	0.0140011	red	GRAS	RAD1
LOC115711573	3-propylmalic acid	0.970222	6.45e-05	Group	***	0.00380828	red	NAC	EXO1
LOC115711573	6-Methylmercaptopurine	0.935342	0.000643427	Group	***	0.0139539	red	NAC	EXO1
LOC115711573	Doxorubicin	0.919427	0.00122993	Group	**	0.0103666	red	NAC	EXO1
LOC115711573	2-Amino-4-oxo-4-alpha-hydroxy-6-(erythro-1',2',3'-trihydroxypropyl)-5,6,7,8-tetrahydroxypterin	0.921682	0.00113151	Group	**	0.0103148	red	NAC	EXO1
LOC115711573	beta-Phellandrene	0.918767	0.00125979	Group	**	0.0117772	red	NAC	EXO1
LOC115711573	伪-Linolenoyl Ethanolamide	0.925195	0.000988652	Group	***	0.0099322	red	NAC	EXO1
LOC115711573	cis,cis-Muconic acid	0.949042	0.000318294	Group	***	0.00469484	red	NAC	EXO1
LOC115711573	Nimodipine	0.926056	0.000955536	Group	***	0.0168282	red	NAC	EXO1
LOC115711573	1,2-Bis(4-hydroxy-3-methoxyphenyl)ethylene	0.952108	0.000264843	Group	***	0.00520858	red	NAC	EXO1
LOC115711573	Spiramycin	0.977771	2.7e-05	Group	***	0.00159333	red	NAC	EXO1
LOC115711573	Mitomycin	0.996931	7.21e-08	Group	***	4.25e-06	red	NAC	EXO1
LOC115712442	Threonic acid	0.958241	0.000176395	Group	***	0.0104073	red	B3	VRN1
LOC115712442	4-Hydroxy-2-oxoglutaric acid	0.972462	5.11e-05	Group	***	0.00301701	red	B3	VRN1
LOC115712442	Sucrose	0.917048	0.00133966	Group	**	0.0500824	red	B3	VRN1
LOC115712442	Oxidized Latia luciferin	0.928122	0.000879068	Group	***	0.0172883	red	B3	VRN1
LOC115712442	Quinic acid	0.941157	0.000487146	Group	***	0.0143708	red	B3	VRN1
LOC115712532	N-butanoyl-lhomoserine lactone	0.92882	0.00085414	Group	***	0.0503943	red	B3	VRN1
LOC115712532	Kaempferol	0.93892	0.000543916	Group	***	0.010697	red	B3	VRN1
LOC115712532	Dehydrocurdione	0.940294	0.00050855	Group	***	0.0151625	red	B3	VRN1
LOC115712532	Shikimic acid	0.929668	0.000824539	Group	***	0.0261417	red	B3	VRN1
LOC115714839	D-Lysine	0.967911	8.06e-05	Group	***	0.00475708	red	CO-like	COL16
LOC115714839	L-Arginine	0.938807	0.000546879	Group	***	0.0322659	red	CO-like	COL16
LOC115714839	L-Pipecolic acid	0.962513	0.000128029	Group	***	0.00524931	red	CO-like	COL16
LOC115715904	Pyropheophytin b	0.92139	0.00114396	Group	**	0.028633	red	MYB	MYB93	CsMYB18
LOC115715904	Glaucarubin	0.957481	0.000186093	Group	***	0.0109795	red	MYB	MYB93	CsMYB18
LOC115715904	N-acetyl-LTE4	0.942852	0.000446834	Group	***	0.0131816	red	MYB	MYB93	CsMYB18
LOC115717221	Nisoldipine	0.931314	0.000768965	Group	***	0.0226845	red	bHLH	BHLH36
LOC115717221	N6,N6,N6-Trimethyl-L-lysine	0.942357	0.000458367	Group	***	0.0270437	red	bHLH	BHLH36
LOC115717221	Hydroxyhydroquinone	0.926788	0.000927975	Group	***	0.0492654	red	bHLH	BHLH36
LOC115717221	(R)-Salsolinol	0.944298	0.000414213	Group	***	0.0244386	red	bHLH	BHLH36
LOC115717221	Kaempferol	0.97242	5.14e-05	Group	***	0.00303068	red	bHLH	BHLH36
LOC115717221	Iridodial glucoside	0.94668	0.000363977	Group	***	0.0107373	red	bHLH	BHLH36
LOC115717221	Melibiitol	0.917148	0.00133493	Group	**	0.0393803	red	bHLH	BHLH36
LOC115719703	6''-Malonylgenistin	0.974811	3.92e-05	Group	***	0.00231309	red	HSF	HSFB1
LOC115720519	similar to capsaicin	0.959073	0.000166164	Group	***	0.00490168	red	B3	VRN1
LOC115720519	Melilotoside	0.934411	0.000671164	Group	***	0.0135291	red	B3	VRN1
LOC115720519	Isocolumbin	0.941185	0.00048645	Group	***	0.0287006	red	B3	VRN1
LOC115720519	Nicardipine	0.953681	0.000239882	Group	***	0.014153	red	B3	VRN1
LOC115720519	Isoquercitrin	0.945365	0.000391177	Group	***	0.0170188	red	B3	VRN1
LOC115720519	Temocaprilat	0.971838	5.47e-05	Group	***	0.00322518	red	B3	VRN1
LOC115720519	Matairesinol	0.967645	8.26e-05	Group	***	0.00487529	red	B3	VRN1
LOC115720519	Galactonic acid	0.945309	0.000392378	Group	***	0.00863779	red	B3	VRN1
LOC115720704	D-Asparagine	0.944319	0.000413762	Group	***	0.024412	red	LBD	LBD15
LOC115720704	Gamma-Linolenic acid	0.933969	0.000684568	Group	***	0.0201948	red	LBD	LBD15
LOC115720704	Acetylcholine	0.932833	0.000719911	Group	***	0.0212374	red	LBD	LBD15
LOC115720704	LysoPC(20:4(8Z,11Z,14Z,17Z))	0.961116	0.000142728	Group	***	0.00280699	red	LBD	LBD15
LOC115720704	LysoPC(20:4(5Z,8Z,11Z,14Z)/0:0)	0.958669	0.000171089	Group	***	0.00336475	red	LBD	LBD15
LOC115720704	D-Glutamine	0.920397	0.00118697	Group	**	0.0700312	red	LBD	LBD15
LOC115723161	Aesculin	0.936979	0.000596541	Group	***	0.00879898	red	CPP	TCX2
LOC115698730	similar to capsaicin	-0.956844	0.000194494	Group	***	0.00490168	blue	YABBY	pyr-7
LOC115698730	Uridine 2',3'-cyclic phosphate	-0.920432	0.00118542	Group	**	0.0145937	blue	YABBY	pyr-7
LOC115698730	Aesculin	-0.947584	0.000346016	Group	***	0.00703606	blue	YABBY	pyr-7
LOC115698730	Prenyl glucoside	-0.932039	0.000745262	Group	***	0.0109926	blue	YABBY	pyr-7
LOC115698730	4-Guanidinobutanoic acid	-0.985725	7.19e-06	Group	***	0.000424466	blue	YABBY	pyr-7
LOC115698730	Kanokoside A	-0.918429	0.00127522	Group	**	0.0126835	blue	YABBY	pyr-7
LOC115698730	Lisinopril	-0.936546	0.000608722	Group	***	0.0128206	blue	YABBY	pyr-7
LOC115698730	Galactonic acid	-0.932576	0.000728049	Group	***	0.00863779	blue	YABBY	pyr-7
LOC115700791	Allantoic acid	-0.971426	5.71e-05	Group	***	0.00336791	blue	bHLH	PRE6
LOC115700791	estrone 3-sulfate	-0.946118	0.000375455	Group	***	0.0221519	blue	bHLH	PRE6
LOC115700791	D-Lysine	-0.943302	0.000436515	Group	***	0.00515087	blue	bHLH	PRE6
LOC115700791	Allantoin	-0.93694	0.000597616	Group	***	0.0352593	blue	bHLH	PRE6
LOC115700791	S-(2-Hydroxyethyl)glutathione	-0.960835	0.00014581	Group	***	0.00860278	blue	bHLH	PRE6
LOC115700791	L-Pipecolic acid	-0.918713	0.00126225	Group	**	0.0148945	blue	bHLH	PRE6
LOC115700935	Doxorubicin	-0.957997	0.000179475	Group	***	0.00290156	blue	B3	VRN1
LOC115700935	2-Amino-4-oxo-4-alpha-hydroxy-6-(erythro-1',2',3'-trihydroxypropyl)-5,6,7,8-tetrahydroxypterin	-0.944693	0.000405601	Group	***	0.00598261	blue	B3	VRN1
LOC115700935	Mannan	-0.928372	0.000870094	Group	***	0.0171118	blue	B3	VRN1
LOC115700935	beta-Phellandrene	-0.925204	0.000988314	Group	***	0.0116621	blue	B3	VRN1
LOC115700935	N-Phenyl-2-naphthylamine	-0.91986	0.00121065	Group	**	0.0145679	blue	B3	VRN1
LOC115700935	伪-Linolenoyl Ethanolamide	-0.920593	0.0011784	Group	**	0.0099322	blue	B3	VRN1
LOC115700935	cis,cis-Muconic acid	-0.949986	0.000301143	Group	***	0.00469484	blue	B3	VRN1
LOC115700935	1,2-Bis(4-hydroxy-3-methoxyphenyl)ethylene	-0.938925	0.000543767	Group	***	0.00767659	blue	B3	VRN1
LOC115700935	Spiramycin	-0.921677	0.00113171	Group	**	0.00834634	blue	B3	VRN1
LOC115700935	Mitomycin	-0.958608	0.000171839	Group	***	0.0020277	blue	B3	VRN1
LOC115702108	Allantoic acid	-0.917924	0.00129859	Group	**	0.0191541	blue	MYB_related	KUA1
LOC115702108	Astaxanthin	-0.926403	0.000942407	Group	***	0.0215078	blue	MYB_related	KUA1
LOC115702833	Pyropheophytin b	-0.947841	0.000341014	Group	***	0.0201199	blue	FAR1	FRS5
LOC115702833	3-propylmalic acid	-0.928614	0.000861443	Group	***	0.010165	blue	FAR1	FRS5
LOC115702833	rhodexin A	-0.920672	0.00117495	Group	**	0.0693218	blue	FAR1	FRS5
LOC115702833	6-Methylmercaptopurine	-0.948684	0.000324967	Group	***	0.0139539	blue	FAR1	FRS5
LOC115702833	2-Amino-4-oxo-4-alpha-hydroxy-6-(erythro-1',2',3'-trihydroxypropyl)-5,6,7,8-tetrahydroxypterin	-0.919565	0.00122378	Group	**	0.0103148	blue	FAR1	FRS5
LOC115702833	Spiramycin	-0.932694	0.000724288	Group	***	0.00613367	blue	FAR1	FRS5
LOC115702833	Astaxanthin	-0.922584	0.00109362	Group	**	0.0215078	blue	FAR1	FRS5
LOC115702833	Mitomycin	-0.93773	0.000575809	Group	***	0.00424659	blue	FAR1	FRS5
LOC115703790	4-(Glutamylamino) butanoate	-0.946984	0.000357882	Group	***	0.0105575	blue	B3	NGA2
LOC115703790	cis,cis-Muconic acid	-0.928188	0.000876691	Group	***	0.00738925	blue	B3	NGA2
LOC115703790	1,2-Bis(4-hydroxy-3-methoxyphenyl)ethylene	-0.927251	0.000910781	Group	***	0.00767659	blue	B3	NGA2
LOC115703790	Mitomycin	-0.920505	0.00118222	Group	**	0.00697509	blue	B3	NGA2
LOC115704023	Nimodipine	-0.924654	0.00100982	Group	**	0.0168282	blue	bHLH	BHLH123
LOC115704050	Alpha-Lactose	-0.941327	0.000483007	Group	***	0.0142487	blue	NAC	NTL9
LOC115704832	Alpha-Lactose	-0.946925	0.000359053	Group	***	0.0142487	blue	ERF	ERF023
LOC115704832	Shikimic acid	-0.927925	0.000886159	Group	***	0.0261417	blue	ERF	ERF023
LOC115704946	Ornaline	-0.953629	0.000240684	Group	***	0.0142003	blue	MYB	MYB1
LOC115705039	similar to capsaicin	-0.941291	0.000483876	Group	***	0.00490168	blue	Trihelix	PTL
LOC115705039	Melilotoside	-0.932014	0.000746068	Group	***	0.0135291	blue	Trihelix	PTL
LOC115705039	4-Guanidinobutanoic acid	-0.976089	3.36e-05	Group	***	0.000660148	blue	Trihelix	PTL
LOC115705039	Lisinopril	-0.929364	0.000835053	Group	***	0.0128206	blue	Trihelix	PTL
LOC115705736	similar to capsaicin	-0.940697	0.000498476	Group	***	0.00490168	blue	GRAS	SCL6
LOC115705736	Melilotoside	-0.931975	0.000747351	Group	***	0.0135291	blue	GRAS	SCL6
LOC115705736	Succinic acid	-0.917547	0.00131617	Group	**	0.0248423	blue	GRAS	SCL6
LOC115705736	4-Guanidinobutanoic acid	-0.973234	4.7e-05	Group	***	0.000692973	blue	GRAS	SCL6
LOC115705736	Galactonic acid	-0.917216	0.00133172	Group	**	0.0112245	blue	GRAS	SCL6
LOC115706127	Aesculin	-0.918677	0.0012639	Group	**	0.0109041	blue	G2-like	IPN2
LOC115706127	4-Guanidinobutanoic acid	-0.920339	0.0011895	Group	**	0.00877256	blue	G2-like	IPN2
LOC115706613	Cucurbitacin Q	-0.929419	0.000833167	Group	***	0.0192388	blue	WRKY	WRKY24
LOC115706613	Galactonic acid	-0.93228	0.000737499	Group	***	0.00863779	blue	WRKY	WRKY24
LOC115706763	9,10,13-TriHOME	-0.947193	0.000353716	Group	***	0.0208693	blue	NF-YB	DPB4
LOC115708825	Erythro-4-hydroxy-L-glutamate(1-)	-0.924079	0.00103269	Group	**	0.0534417	blue	HSF	HSFB3
LOC115708959	Allantoic acid	-0.926449	0.000940649	Group	***	0.0184994	blue	MYB	MYB90	CsMYB82
LOC115711395	Fenoprofen	-0.934814	0.000659054	Group	***	0.0129614	blue	NF-YA	NFYA9
LOC115711395	Zederone	-0.947417	0.000349292	Group	***	0.0103041	blue	NF-YA	NFYA9
LOC115711395	Doxorubicin	-0.967323	8.51e-05	Group	***	0.00251072	blue	NF-YA	NFYA9
LOC115711395	8-oxoguanine	-0.97103	5.95e-05	Group	***	0.00350875	blue	NF-YA	NFYA9
LOC115711395	beta-Phellandrene	-0.966915	8.83e-05	Group	***	0.00260506	blue	NF-YA	NFYA9
LOC115711395	N-Phenyl-2-naphthylamine	-0.946271	0.000372298	Group	***	0.00732186	blue	NF-YA	NFYA9
LOC115711395	伪-Linolenoyl Ethanolamide	-0.920857	0.00116691	Group	**	0.0099322	blue	NF-YA	NFYA9
LOC115711395	o-Xylene	-0.932287	0.000737292	Group	***	0.0217501	blue	NF-YA	NFYA9
LOC115711395	C.I. Natural Red 20	-0.945107	0.000396687	Group	***	0.0078015	blue	NF-YA	NFYA9
LOC115711395	Soyasapogenol C	-0.927937	0.000885738	Group	***	0.0130646	blue	NF-YA	NFYA9
LOC115711395	1,2-Bis(4-hydroxy-3-methoxyphenyl)ethylene	-0.930524	0.000795321	Group	***	0.00767659	blue	NF-YA	NFYA9
LOC115711395	Pterostilbene	-0.938749	0.000548407	Group	***	0.0127753	blue	NF-YA	NFYA9
LOC115711395	S-(2-Hydroxyethyl)glutathione	-0.939089	0.000539482	Group	***	0.0112277	blue	NF-YA	NFYA9
LOC115711472	Allantoic acid	-0.946029	0.000377289	Group	***	0.01113	blue	bHLH	BHLH72	CsbHLH39
LOC115711472	estrone 3-sulfate	-0.927316	0.000908387	Group	***	0.0267974	blue	bHLH	BHLH72	CsbHLH39
LOC115711472	D-Lysine	-0.94524	0.000393841	Group	***	0.00515087	blue	bHLH	BHLH72	CsbHLH39
LOC115711472	S-(2-Hydroxyethyl)glutathione	-0.93791	0.000570901	Group	***	0.0112277	blue	bHLH	BHLH72	CsbHLH39
LOC115711472	Astaxanthin	-0.938464	0.000556001	Group	***	0.0215078	blue	bHLH	BHLH72	CsbHLH39
LOC115711472	L-Pipecolic acid	-0.928335	0.000871391	Group	***	0.012853	blue	bHLH	BHLH72	CsbHLH39
LOC115711573	similar to capsaicin	-0.932987	0.000715031	Group	***	0.00527335	blue	NAC	EXO1
LOC115711573	Melilotoside	-0.92133	0.00114654	Group	**	0.0135291	blue	NAC	EXO1
LOC115711573	4-Guanidinobutanoic acid	-0.95826	0.000176159	Group	***	0.00173223	blue	NAC	EXO1
LOC115711573	Galactonic acid	-0.934048	0.000682166	Group	***	0.00863779	blue	NAC	EXO1
LOC115711573	Dehydrocurdione	-0.917371	0.00132443	Group	**	0.0151625	blue	NAC	EXO1
LOC115712532	3-propylmalic acid	-0.952473	0.000258906	Group	***	0.00739052	blue	B3	VRN1
LOC115714839	Aesculin	-0.946989	0.000357766	Group	***	0.00703606	blue	CO-like	COL16
LOC115714839	4-Guanidinobutanoic acid	-0.930113	0.000809241	Group	***	0.00682075	blue	CO-like	COL16
LOC115719703	trans-Aconitic acid	-0.930509	0.000795799	Group	***	0.0469521	blue	HSF	HSFB1
LOC115720519	4-(Glutamylamino) butanoate	-0.928702	0.000858331	Group	***	0.0168805	blue	B3	VRN1
LOC115720519	cis,cis-Muconic acid	-0.944032	0.000420097	Group	***	0.00495714	blue	B3	VRN1
LOC115720519	Lamioside	-0.95166	0.000272255	Group	***	0.016063	blue	B3	VRN1
Bassolino et al., annotation is according to the reference (Bassolino, L., Buti, M., Fulvio, F., Pennesi, A., Mandolino, G., Milc, J., et al. (2020). In silico identification of MYB and bHLH families reveals candidate transcription factors for secondary metabolic pathways in Cannabis sativa L. Plants. 9(11), 1540. doi:10.3390/plants9111540.)
Adjusted p-values was calculated using the Benjamin & Hochberg method according to the reference ( Benjamini, Y., and Hochberg, Y. (1995). Controlling the false discovery rate: a practical and powerful approach to multiple testing. J. R. Stat. Soc. B 57, 289–300. doi: 10.2307/2346101)
*, **, and *** indicate significant differences at the p < 0.05, 0.01, and 0.001 levels, respectively.
