# Supplementary material for: Transcriptomic and metabolomic analyses reveal the differential accumulation of phenylpropanoids and terpenoids in hemp autotetraploid and its diploid progenitor
Source: BMC Plant Biol. 2023 Dec 5;23:616. doi: 10.1186/s12870-023-04630-z (PMC10696708; doi:10.1186/s12870-023-04630-z)
Supplement: Supplementary file 6 — Additional file 6: Supplementary Table S8. Polyploidization-modulated terpenoids and flavonoids. [file 12870_2023_4630_MOESM6_ESM.xlsx]

## Sheet: flavonoids in DEMs
Supplementary Table S8: Polyploidization-modulated terpenoids and flavonoids (XLS).
Polyploidization-modulated flavonoids
ID	m/z	Retention time (min)	Ion mode	Metabolites	Compound ID	Class	kegg	Score	Fragmentation Score	Adducts	Formula	Mass Error (ppm)	VIP	P-value	adj.P-value	log2(FC)	FC	average(Cs4XF)	average(Cs2XF)	Cs4XF1	Cs4XF2	Cs4XF3	Cs4XF4	Cs4XF5	Cs4XF6	Cs4XF7	Cs4XF8	Cs2XF1	Cs2XF2	Cs2XF3	Cs2XF4	Cs2XF5	Cs2XF6	Cs2XF7	Cs2XF8
4.83_487.0918m/z	487.092	4.82842	neg	(-)-Catechin 3-O-gallate	HMDB0029255	Flavonoids		37.2	0	M+FA-H	C22H18O10	8.19956	1.02274	1.62098e-06	0.000537466	2.39874	5.27344	30479.7	5779.85	25205.2	28673	32049.3	36095.8	23127.9	31069.5	34861.6	32755.2	7973.77	3752.57	5869.98	6643.83	5393.95	5194.32	5228.26	6182.13
6.18_446.1105m/z	446.111	6.17882	pos	Theaflavic acid	95089	Flavonoids		37.9	0	M+NH4	C21H16O10	5.51894	1.01867	0.000996778	0.00725153	-1.16226	0.446812	23720.4	53088.2	10686.9	25265.9	16507.8	45382.3	12738	26954.6	19463	32764.8	70891.4	56820.7	47128.7	59893.6	52529.6	48099.7	32467.6	56873.9
11.70_497.1257m/z	497.126	11.6961	neg	Aspalathin	52331	Flavonoids		36.1	0	M+FA-H	C21H24O11	-9.6553	2.40615	0.000101774	0.0021375	0.481786	1.39647	522585	374218	494645	527816	524490	424076	516955	585040	583044	524616	383052	364209	379841	352797	377268	368201	355398	412981
5.46_287.0550m/z	287.055	5.45583	pos	Kaempferol	3410	Flavonoids	C05903	44.1	24.6	M+H	C15H10O6	0.101609	1.29968	0.00141681	0.00880659	-1.84657	0.278053	18638.6	67032.6	19916.1	9608.09	11117.2	13611.8	34852.6	17559.4	22209	20234.4	117874	27073.8	50040.1	92033.1	60504.8	63407	59211.7	66116.5
6.20_490.1476n	491.155	6.19717	pos	4',5,6-Trimethylscutellarein 7-glucoside	95003	Flavonoids		45.3	27.8	M+H, M+NH4, M+Na, M+K, M+H-H2O	C24H26O11	0.131468	9.33725	2.5629e-05	0.00110872	2.87321	7.32694	2.38678e+06	325754	1.93708e+06	2.68544e+06	2.80825e+06	1.99566e+06	2.27269e+06	2.33512e+06	2.42857e+06	2.63142e+06	1.04224e+06	66372.5	51862.5	415801	293793	275509	182649	277805
2.04_611.1457m/z	611.146	2.03853	neg	Gladiatoside C2	91399	Flavonoids		36.4	0	M+FA-H	C29H26O12	8.9602	5.77405	0.000115709	0.00227239	0.610876	1.52719	2.7347e+06	1.79068e+06	3.27686e+06	3.08269e+06	2.50834e+06	2.58929e+06	2.68775e+06	2.453e+06	2.32981e+06	2.94992e+06	2.52133e+06	1.52797e+06	1.27844e+06	1.69471e+06	1.8959e+06	1.5797e+06	1.93888e+06	1.88853e+06
5.05_449.1081m/z	449.108	5.04545	pos	Orientin	HMDB0030614	Flavonoids	C10114	59.1	96.8	M+H	C21H20O11	0.519816	5.55398	0.000152087	0.00260642	-3.02216	0.123095	108539	881753	90556.6	79979.9	143682	81389.1	143710	102791	129430	96774.8	671451	794287	350203	1.04143e+06	1.09203e+06	905611	1.33481e+06	864203
5.04_448.1013n	447.094	5.04452	neg	Luteoloside	LMPK12113403	Flavonoids	C03951	51.9	64.8	M-H, 2M-H, M+FA-H	C21H20O11	1.55801	4.18069	0.00045866	0.00467928	-2.73341	0.15037	80700.1	536676	66901.1	55912.5	115014	60377.4	106162	79343	96085.8	65804	380408	415292	221082	607634	658841	618403	909388	482364
5.14_625.1766m/z	625.177	5.14408	pos	Isoscoparin 2''-O-glucoside	LMPK12110747	Flavonoids		54.2	73	M+H	C28H32O16	0.432157	3.78631	0.0166649	0.0449515	1.02508	2.03507	1.13121e+06	555858	1.32443e+06	785390	1.31727e+06	610641	1.3712e+06	1.03558e+06	1.53919e+06	1.06596e+06	18562.6	79537.2	1.78518e+06	265503	626193	592488	568487	510914
5.04_769.2210m/z	769.221	5.04452	neg	Isorhamnetin 3-O-[a-L-rhamnopyranosyl-(1->3)-a-L-rhamnopyranosyl-(1->6)-b-D-glucopyranoside]	HMDB0039850	Flavonoids		55.7	81.8	M-H	C34H42O20	1.73978	3.5355	0.0001016	0.00213699	-3.47768	0.0897667	31147	346977	18273.9	19287.8	37432.1	41895.8	38777.6	25879.8	33442.4	34186.3	269222	418862	153339	513697	439788	373826	269660	337420
5.46_549.1244m/z	549.124	5.45583	pos	Luteolin 3'-methyl ether 7-malonylglucoside	LMPK12110785	Flavonoids		54.5	75.2	M+H	C25H24O14	0.939223	3.27807	0.000966994	0.00713043	-5.15398	0.0280865	8557.68	304690	10231.5	3500.26	10749.8	6758.43	10865.2	7468.63	10215	8672.7	24424.4	245084	485135	180942	407892	450804	369897	273340
4.89_627.1563m/z	627.156	4.89125	pos	Quercetin 3-glucosyl-(1->2)-galactoside	HMDB0037537	Flavonoids		57.4	91.3	M+H	C27H30O17	1.09741	3.14967	0.00139194	0.00873272	-1.48056	0.358349	154687	431664	133474	88962.8	97321.1	87687.4	345903	113881	148944	221319	624676	229969	505472	467523	356622	392644	383990	492419
5.24_463.0886m/z	463.089	5.24023	neg	Quercetin 3-galactoside	HMDB0030775	Flavonoids	C10073	56.5	87	M-H	C21H20O12	0.761213	2.86685	0.0150762	0.0418786	-1.415	0.375009	168929	450467	165214	98237.2	78218.5	78047.6	446101	121319	209402	154896	814179	95374.8	549404	386487	358529	579872	375235	444659
5.28_639.1557m/z	639.156	5.27852	pos	Patuletin 3-gentiobioside	HMDB0037541	Flavonoids		46.3	35.7	M+H-H2O	C28H32O18	0.141719	2.5696	0.00106639	0.00751253	-2.13436	0.227768	53551.3	235113	58432	47998.7	59072.1	47805.1	51448.3	53553.2	60511.8	49589.1	36769.3	233968	279196	191156	305601	231210	364272	238731
5.59_535.1090m/z	535.109	5.592	pos	4',5-Dihydroxy-3,3'-dimethoxy-6,7-methylenedioxyflavone 4'-glucuronide	HMDB0037758	Flavonoids		39.2	0	M+H	C24H22O14	1.38719	2.02402	0.022007	0.0549945	-1.33366	0.396759	97772.6	246428	93976.1	91844.3	80616.1	69957.2	137599	102855	114044	91289.4	561155	97663.7	191309	280169	201028	225294	167805	247001
5.44_613.0818m/z	613.082	5.44003	neg	Myricetin 7-(6''-galloylglucoside)	HMDB0035463	Flavonoids		43.6	27	M-H2O-H	C28H24O17	-2.74595	2.02075	0.00112751	0.007732	0.314511	1.24359	625881	503285	683943	575768	624568	501882	680631	672073	632436	635743	524376	524506	530938	437025	449384	474557	540293	545202
5.98_448.1378n	493.136	5.97558	neg	Isosakuranin	LMPK12140336	Flavonoids		47.2	40.3	M-H, M+FA-H	C22H24O10	1.9254	2.01434	0.00339601	0.0151555	-2.52756	0.173432	25683.8	148092	37972.1	16875.7	26438.1	20557	27623.9	22020.7	27793.4	26189.8	45037.4	99688.8	302375	86483.3	160967	196821	151687	141675
5.44_609.1455m/z	609.146	5.43807	pos	Hypoletin 8-gentiobioside	HMDB0038824	Flavonoids		40.5	29.7	M+H-H2O	C27H30O17	0.831589	1.95385	0.00271428	0.0131172	-1.29003	0.408944	79710.5	194918	83766.1	71406.3	85371.7	49764.3	70471.6	97435.4	105193	74276.1	43647.6	188255	238325	154173	222185	191503	312424	208833
5.60_533.0948m/z	533.095	5.6026	neg	6''-Malonylastragalin	HMDB0037434	Flavonoids		55	80	M-H	C24H22O14	2.07836	1.92767	0.0093459	0.0298994	-1.43617	0.369546	72144.4	195224	76053.6	54781.2	66046.9	45496.3	121842	68256.3	71307.3	73371.8	402597	77417.2	152647	223158	160797	172582	140942	231655
6.06_473.1107m/z	473.111	6.05587	pos	Cyanidin 3-(6-acetylgalactoside)	46876	Flavonoids		37.5	0	M+H-H2O	C23H22O12	5.84679	1.69896	0.00034409	0.00404541	0.474676	1.38961	282392	203217	237803	296302	279418	332967	284085	302227	251726	274607	204038	236338	246973	238699	180584	171995	154053	193056
5.69_565.1191m/z	565.119	5.68892	pos	Isorhamnetin 3-(6''-malonylglucoside)	HMDB0038820	Flavonoids		56.6	89.2	M+H	C25H24O15	0.504141	1.49763	0.000870575	0.0067258	-1.49949	0.353679	33444.3	94561.1	42810.3	24933.8	29774.3	17896.9	52159.9	34682.4	37839.5	27457.4	51388.5	87860.3	147982	80062.8	96112.4	99748.7	86554.4	106779
5.50_621.1468m/z	621.147	5.50023	neg	Maysin	HMDB0037419	Flavonoids		47.2	43.2	M+FA-H	C27H28O14	1.13218	1.44754	0.00110547	0.00765417	-4.17014	0.0555474	3410.42	61396.6	3650.44	1700.23	4534.59	5561.05	2681.89	2268.53	3642.78	3243.85	5.24594e-08	58848	83927.4	48349.8	74481.8	65020.9	105505	55040.2
4.89_465.1034m/z	465.103	4.89125	pos	Isoquercitrin	HMDB0037362	Flavonoids	C05623	57.8	94.4	M+H	C21H20O12	1.3297	1.37843	0.00203577	0.0109914	-1.52872	0.346586	28669	82718.2	23778.9	13516.4	19815.8	19330.7	67605.3	22492.5	30194.3	32617.8	124626	41118.1	95721.4	91610.3	64767.4	75492.4	71809	96601.6
4.99_712.1508n	711.144	4.9854	neg	Quercetin 3-O-(6"-malonyl-glucoside) 7-O-glucoside	HMDB0029270	Flavonoids		49.4	58.5	M-H, M+FA-H	C30H32O20	2.99254	1.21616	0.00190247	0.0105513	-1.3469	0.393135	27331.4	69521.8	27011.8	18665.1	22502.3	18450.9	47492.5	26781.8	27251.6	30495.6	102775	30369.9	81702.9	81824.8	51916.4	65100.3	65186.9	77297.4
5.60_489.1049m/z	489.105	5.6026	neg	Kaempferol 3-(6-acetylgalactoside)	HMDB0035466	Flavonoids		51.6	64.4	M-H	C23H22O12	2.0693	1.15527	0.0100226	0.0314285	-1.55259	0.340898	23032.7	67564.8	23785.8	17154.1	21351.3	14523.5	37161.7	20865.1	25148.8	24271.4	145317	24966.9	54566	79441.4	57319.9	56291	46693.2	75922.8
6.70_550.1693n	568.203	6.7039	pos	Liquiritin apioside	HMDB0037491	Flavonoids		40.5	12.5	M+NH4, M+Na	C26H30O13	1.16405	1.14371	0.0138762	0.0394978	-4.09685	0.0584421	2830.88	48439.1	4455.41	2942.38	1310.57	2094.61	930.132	3319.56	5286.27	2308.14	9393.27	950.954	126575	33492.9	50281.5	69811.8	45182	51825.8
6.19_557.1297m/z	557.13	6.18598	neg	Apigenin 7-[6''-(3-Hydroxy-3-methylglutaryl)glucoside]	LMPK12110401	Flavonoids		43.4	23.4	M-H2O-H	C27H28O14	-0.57769	1.1313	6.00762e-05	0.00164325	2.32504	5.01081	38516.7	7686.72	35774.1	41662.8	49282.8	24171	38447.3	38841.3	42604.8	37349.2	16723.3	4369.45	3214.28	10428.8	6204.79	6378.98	7213.83	6960.32
7.46_625.1460m/z	625.146	7.45788	neg	Kaempferol 3-apiosyl-(1->2)-galactoside	50080	Flavonoids		37.2	0	M+FA-H	C26H28O15	8.5564	1.03588	0.000473734	0.00476222	-39.01	1.80639e-12	5.24594e-08	29041.1	5.24594e-08	5.24594e-08	5.24594e-08	5.24594e-08	5.24594e-08	5.24594e-08	5.24594e-08	5.24594e-08	5.24594e-08	47791.3	35520.6	28575.7	30214.7	32726	27774.1	29726.2
13.50_557.0580m/z	557.058	13.5023	neg	8-Hydroxyluteolin 4'-methyl ether 8-glucoside-3'-sulfate	LMPK12111394	Flavonoids		43.2	33.7	M-H	C22H22O15S	-4.74122	1.03293	0.0245262	0.0594846	0.445426	1.36172	156018	114574	142629	168400	180832	135659	94325.2	217212	171020	138066	120199	143663	147047	95359.1	109551	113254	70017.5	117504
7.48_300.0638n	299.056	7.47975	neg	Diosmetin	44398	Flavonoids	C10038	56.6	87.2	M-H, 2M-H	C16H12O6	1.28743	4.74372	0.00734408	0.025303	3.11814	8.68265	820803	94533.7	701841	272751	1.18366e+06	107417	1.30822e+06	722178	1.70029e+06	570062	80060.2	89213.3	79890.1	86883.8	98075.6	147975	56000	118171
1.04_329.0666m/z	329.067	1.04347	neg	Galangin 3-methyl ether	LMPK12111654	Flavonoids	C11577	38	0.199	M+FA-H	C16H12O5	-0.119374	1.50237	0.00036529	0.00417278	2.55428	5.87374	74258.3	12642.4	59757.2	127515	60568.6	106493	31080.9	94096.3	60836.1	53720.2	13519.8	23965.7	902.95	19535.7	8764.4	11016.4	12131.8	11302.6
7.42_301.0721m/z	301.072	7.41527	neg	5,7,3'-Trihydroxy-4'-methoxyflavanone	HMDB0030746	Flavonoids		51.9	63.2	M-H	C16H14O6	1.15722	1.25035	0.000120107	0.0023123	2.11052	4.31845	51607.7	11950.5	25142.3	56112.5	43853.1	76122.3	50475	51756.1	61470	47930.3	5259.27	12883	17742.2	7716.22	12970.4	13589.4	13600.9	11842.6
10.36_301.0708m/z	301.071	10.3642	pos	Chrysoeriol	LMPK12110799	Flavonoids	C04293	46.9	39.9	M+H	C16H12O6	0.605564	1.05341	0.00379845	0.016309	2.90683	7.49966	39401	5253.71	33788.3	16095.4	59844.5	7131.36	45165.2	39029.8	78000.9	36152.7	1105.57	4713.83	6441.55	4411.68	6370.41	9241.07	2933.55	6811.98
5.62_493.1496m/z	493.15	5.62342	neg	Cycloartomunin	LMPK12110916	Flavonoids		36.2	1.8	M+FA-H	C26H24O7	-1.7805	1.12347	0.00673676	0.023853	0.906655	1.87469	82733.9	44132	88442.4	54654.1	103037	50137.7	111189	75997.8	86512.8	91900.7	23512.7	64282.3	35144.8	39658.6	41274.9	41917.9	57978.4	49286.2

## Sheet: terpenoids in DEMs
Supplementary Table S8: Polyploidization-modulated terpenoids and flavonoids (XLS).
Polyploidization-modulated terpenoids
ID	m/z	Retention time (min)	Ion mode	Metabolites	Compound ID	Class	kegg	Score	Fragmentation Score	Adducts	Formula	Mass Error (ppm)	VIP	P-value	adj.P-value	log2(FC)	FC	average(Cs4XF)	average(Cs2XF)	Cs4XF1	Cs4XF2	Cs4XF3	Cs4XF4	Cs4XF5	Cs4XF6	Cs4XF7	Cs4XF8	Cs2XF1	Cs2XF2	Cs2XF3	Cs2XF4	Cs2XF5	Cs2XF6	Cs2XF7	Cs2XF8
4.65_152.1203n	153.128	4.65042	pos	(R)-(+)-Pulegone	41112	Monoterpenoids	C09893	53.5	70.4	M+H-H2O, M+H	C10H16O	1.22617	4.20771	0.0126904	0.0371014	0.645553	1.56434	1.5356e+06	981628	1.5897e+06	1.6425e+06	1.30519e+06	1.37916e+06	1.15392e+06	1.84823e+06	1.8098e+06	1.5563e+06	470138	1.42857e+06	1.18703e+06	1.30501e+06	934353	761755	707298	1.05888e+06
10.24_135.1170m/z	135.117	10.2403	pos	(S)-(-)-Perillyl alcohol	41074	Monoterpenoids	C02452	56.9	87.4	M+H-H2O	C10H16O	1.07357	3.74885	0.000180263	0.00284247	1.92159	3.78841	481696	127150	339177	648927	461396	469280	316721	640769	551612	425690	192746	156099	68110.5	185528	109127	104601	90358.9	110632
11.70_178.1358n	179.143	11.7034	pos	2-Ethoxy-1-methyl-4-(1-methylethyl)benzene	92224	Monoterpenoids		45.9	31.7	M+H-H2O, M+H	C12H18O	0.225308	2.08952	0.00498418	0.0194256	0.627962	1.54538	374382	242259	399238	292927	450434	268594	513885	317955	378787	373233	283659	205888	270982	286400	203915	213280	257541	216403
7.19_339.1955m/z	339.196	7.19133	pos	Piperochromanoic acid	HMDB0040634	Monoterpenoids		49.5	50.3	M+H-H2O	C22H28O4	0.200624	1.96086	0.00436806	0.0178746	1.684	3.21318	164688	51253.9	120677	265073	154884	143520	64620.9	268015	180486	120229	66639.7	37887.3	82582.5	47661.5	44240.1	49927.8	25919.7	55172.2
5.73_153.1275m/z	153.128	5.72917	pos	Dihydrocarvone	91250	Monoterpenoids	C18018	54.9	76.8	M+H	C10H16O	0.749632	1.81209	0.00139117	0.00873155	0.688653	1.61178	251482	156027	180108	248213	216374	341369	211821	306253	250980	256736	139307	151197	203577	187840	139056	138086	131769	157388
11.13_417.2285m/z	417.229	11.1314	neg	9'-Carboxy-gamma-tocotrienol	HMDB0012869	Monoterpenoids		52.4	66.4	M+FA-H	C23H32O4	0.731837	1.77759	0.00166739	0.00975276	0.547303	1.46135	277259	189728	275724	270446	281766	213317	263754	296453	338904	277706	209854	237374	176982	168993	184177	181443	147939	211058
5.53_208.1464n	209.154	5.53213	pos	Carvyl propionate	HMDB0038047	Monoterpenoids		44.8	26.6	M+H, M+K, M+H-H2O	C13H20O2	0.394808	1.74608	0.00301865	0.0140244	-0.721897	0.6063	134888	222477	159424	119767	152745	122294	127453	127572	143470	126376	140886	284771	247266	192053	253229	246564	241634	173410
0.92_144.1020m/z	144.102	0.917133	pos	1-Aminocyclohexanecarboxylic acid	6589	Monoterpenoids		46.4	36.4	M+H	C7H13NO2	0.974256	1.56553	0.000314708	0.00385484	-1.00534	0.498151	62899.4	126266	51137.3	64884.5	49145.2	69143.5	78330.2	67397.6	64135.3	59021.8	159085	160839	106276	117425	99890.4	119535	122546	124530
11.91_137.1325m/z	137.133	11.9075	pos	beta-Phellandrene	91251	Monoterpenoids	C19818	49.4	50	M+H	C10H16	0.49314	1.53376	4.22021e-05	0.00139882	2.56497	5.91742	68600.9	11593	58252.8	69528	85179.2	47542.1	91739.1	50158.3	74279.1	72128.7	22857.4	8138.65	6783.45	11267.2	13180.3	10841.9	8967.25	10708.2
4.59_185.1175m/z	185.117	4.59322	pos	(S)-Oleuropeic acid	91982	Monoterpenoids		54.8	78	M+H	C10H16O3	1.27994	1.38811	0.000414438	0.00444564	-1.93475	0.261566	18270.5	69850.6	18438.2	17689.8	18934.5	19989.1	19384	16431.5	18486	16811.1	78826.5	29592.3	113936	58544.5	70659.3	67885	76746.1	62615.5
5.22_252.1362n	253.143	5.2191	pos	2,2,4,4-Tetramethyl-6-(1-oxobutyl)-1,3,5-cyclohexanetrione	89070	Monoterpenoids		45.6	30.7	M+H-H2O, M+H	C14H20O4	-0.0118754	1.37634	0.00335711	0.015036	-0.785991	0.579953	78391.1	135168	85106	70151.9	89201.3	74629.7	75737.5	73466.9	85982.9	72852.6	76557.1	142924	170439	98522.6	171798	162492	154056	104554
1.72_221.1538m/z	221.154	1.71765	pos	2,6-di-tert-butylbenzoquinone	85272	Monoterpenoids		47.2	42.7	M+H	C14H20O2	1.02223	1.34697	0.023171	0.0571592	-0.239412	0.84709	399204	471265	403877	383412	407687	386071	420150	419909	411274	361250	593394	495286	524053	500306	414810	427229	421459	393582
11.38_281.1723m/z	281.172	11.3822	pos	2-Hydroxypropyl 2-isopropyl-5-methylcyclohexyl carbonate	HMDB0059946	Monoterpenoids		41.9	14	M+Na	C14H26O4	-0.0542172	1.27809	9.60567e-05	0.00208344	1.73131	3.32029	58600.2	17649.1	47935.9	52856.9	55957.8	40681	61390.3	69535.8	75137	65307.4	29617.3	11469.6	13597.2	18606.6	15259.8	15881.6	13407.2	23354
9.35_149.1326m/z	149.133	9.34795	pos	Limonene aldehyde	HMDB0030252	Monoterpenoids		41.3	8.84	M+H-H2O	C11H18O	0.816197	1.13859	0.0281397	0.0655437	-3.08925	0.117501	6765	57574	6159	7552.36	6351.53	6601.8	6890.97	7394.44	6563.39	6606.52	4779.73	172651	5146.69	68826.5	60388.8	41254.4	48718	58826.6
11.76_274.1801m/z	274.18	11.7649	pos	alpha-Terpinyl anthranilate	HMDB0038051	Monoterpenoids		41.7	13.7	M+H	C17H23NO2	-0.158346	1.056	0.000166208	0.00270813	1.90157	3.7362	39179.2	10486.4	33908.6	61628.4	25980.6	39672.6	31531	34459.9	47778.4	38473.9	1900.49	19104.9	17538.8	7161.93	10493.2	8111.71	6173.01	13406.9
8.46_264.1362n	247.133	8.46083	pos	Curcolonol	HMDB0033227	Sesquiterpenoids		56.9	86.5	M+H-H2O, M+Na	C15H20O4	-0.0270286	15.3252	0.000569668	0.00524632	-8.67323	0.00244961	15740.3	6.42563e+06	20201.7	25447.9	16668	20997.9	13588.6	11796.4	8809.79	8412.06	10418	7.19278e+06	1.10634e+07	5.72552e+06	6.91978e+06	7.21131e+06	6.3066e+06	6.97531e+06
8.46_246.1258n	245.119	8.45963	neg	Lacinilene C	HMDB0036455	Sesquiterpenoids		42.7	16.8	M-H, 2M-H, M+FA-H	C15H18O3	0.801104	13.3252	0.000463072	0.00470632	-8.20522	0.00338832	16279.9	4.80471e+06	17307.1	22490.9	16401.9	23039.8	16132	11471.1	11459.2	11936.9	16955.9	5.5606e+06	7.76227e+06	4.17625e+06	5.14709e+06	5.3001e+06	4.76431e+06	5.71007e+06
6.18_350.1578n	368.192	6.17882	pos	Eremopetasin sulfoxide	88110	Sesquiterpenoids		36.3	0	M+NH4, M+Na, M+K, M+H-H2O	C19H26O4S	7.37728	9.41983	0.000408907	0.00442265	-1.82827	0.281602	968120	3.43791e+06	396856	978965	484815	2.449e+06	468276	1.04282e+06	752075	1.17217e+06	5.06611e+06	3.70846e+06	2.4933e+06	4.35741e+06	3.36303e+06	3.01736e+06	1.57764e+06	3.91993e+06
5.53_462.1891n	463.196	5.53213	pos	13-Hydroxy-5'-O-methylmelledonal	HMDB0035864	Sesquiterpenoids		44.9	29.7	M+H, M+NH4, M+H-H2O	C24H30O9	0.175039	5.08802	0.000551285	0.00517163	1.70303	3.25583	1.00115e+06	307495	1.15417e+06	831482	1.11422e+06	579714	1.50812e+06	730432	1.09725e+06	993823	51691.9	565692	400698	186843	348327	328045	369268	209397
7.72_246.1264n	247.133	7.71765	pos	Curcolone	HMDB0038188	Sesquiterpenoids		53.7	74.4	M+H-H2O, M+H	C15H18O3	3.31207	4.74469	0.000480141	0.00479675	-7.39002	0.00596187	3646.06	611563	5265.03	4049.07	3726.79	3389.36	4152.58	3420.8	2784.39	2380.43	2246.57	867778	886388	503445	673490	733773	551829	673552
9.35_222.1985n	205.195	9.34795	pos	Rosifoliol	91079	Sesquiterpenoids		53.1	68.2	M+H-H2O, M+H	C15H26O	0.56107	4.20301	0.0245465	0.0595042	-4.2879	0.0511933	36427.7	711571	31122.7	41628.2	36186.9	32261.1	40208.6	40166.4	35877.8	33969.8	25990.6	2.17567e+06	32453.8	848197	730940	505989	596128	777203
6.08_244.1098n	245.117	6.07535	pos	Glandulone B	HMDB0038548	Sesquiterpenoids		51.3	59.6	M+H-H2O, M+H	C15H16O3	-0.517265	3.9105	2.64599e-05	0.00112401	2.09641	4.27643	481673	112634	463890	418868	585678	347093	561346	444081	562946	469486	206632	74759.7	56193.5	137138	113412	102008	94070.2	116863
9.01_222.1985n	205.195	9.00845	pos	Nerolidol	90926	Sesquiterpenoids		47.1	38.3	M+H-H2O, M+H	C15H26O	0.434065	3.60671	0.0206357	0.0525217	-2.97806	0.126915	68990.1	543591	92372.8	48265.7	68287.2	43437.2	88117.3	67602.7	83548.4	60289.2	94569.9	1.50019e+06	73939.4	626294	563808	441789	494940	553203
12.05_223.2056m/z	223.206	12.0504	pos	trans,trans-Farnesol	65504	Sesquiterpenoids	C06081	55.4	79.9	M+H	C15H26O	-0.286219	3.39723	0.0196809	0.0507855	-3.39672	0.0949482	44161.8	465115	48416.4	34492.7	54717.2	26125.1	54378.1	44904.8	53436.4	36824	38905.9	1.30033e+06	54193	535648	448628	381932	450440	510842
11.00_219.1744m/z	219.174	11.002	pos	Hernandulcin	HMDB0037906	Sesquiterpenoids		51.8	63.2	M+H-H2O	C15H24O2	0.292508	3.10964	0.00504856	0.0196018	0.839608	1.78956	728841	407273	1.28638e+06	705143	731251	399317	763194	598505	682375	664569	484799	409826	450560	405931	378565	389751	367442	371310
5.52_485.2034m/z	485.203	5.51998	neg	15-Acetoxyscirpene-3,4-diol 4-O-a-D-glucopyranoside	HMDB0035590	Sesquiterpenoids		48.5	46.6	M-H	C23H34O11	1.25971	3.04444	0.00292691	0.013779	-7.62903	0.00505166	1391.76	275506	1477.59	2160.56	1506.98	390.289	7.56425	2091.32	2567.52	932.278	4361.3	565177	87680.5	272892	327618	256155	401075	289093
4.95_209.1537m/z	209.154	4.94652	pos	4,5-Dihydrovomifoliol	HMDB0040615	Sesquiterpenoids		54.8	76.1	M+H-H2O	C13H22O3	0.235941	2.64198	0.000271179	0.00358183	-1.50651	0.351962	96017.5	272807	115029	84177.6	92972.6	114512	91084.5	80733.2	91828.7	97802.8	163414	347422	265868	261573	339434	295081	309924	199737
4.43_398.1814m/z	398.181	4.432	pos	8-Oxodiacetoxyscirpenol	HMDB0037056	Sesquiterpenoids		47.9	45	M+NH4	C19H24O8	1.26402	2.58538	5.84873e-06	0.000681161	4.80578	27.9695	166360	5947.93	121695	147745	178465	146785	138334	224579	173531	199749	18732.1	2770.46	1024.33	7020.24	5509.74	5814.98	2365.12	4346.47
7.53_452.2050n	475.194	7.53068	pos	8-Isobutanoylneosolaniol	HMDB0038561	Sesquiterpenoids		43.1	19.4	M+Na, M+K, M+NH4, M+H	C23H32O9	0.795256	2.30859	0.000954255	0.00708462	-8.59908	0.00257881	381.984	148124	655.65	637.916	5.24594e-08	1100.87	5.24594e-08	141.522	370.225	149.693	1739.2	123050	259284	98206.6	164807	200479	174111	163316
11.72_237.1849m/z	237.185	11.7223	pos	(3xi,7(11)Z)-7(11)-Copaene-4,12-diol	92312	Sesquiterpenoids		52.7	67.7	M+H	C15H24O2	-0.0599927	2.28737	0.00132398	0.00849977	0.710193	1.63602	376041	229851	390062	298713	434579	311642	517381	305204	381480	369264	244808	196506	269375	274171	204776	209050	244098	196022
10.22_201.1639m/z	201.164	10.2205	pos	Alpha-Calacorene	265068	Sesquiterpenoids		51	60.4	M+H	C15H20	0.704369	2.27464	0.00164932	0.00968352	-0.874658	0.545383	190539	349368	205805	152589	220786	224162	194260	175287	181103	170323	398665	380419	278562	561528	280229	289184	320127	286228
8.80_237.1849m/z	237.185	8.80062	pos	(4S)-Dihydrocurcumenone	HMDB0033083	Sesquiterpenoids		55	80.3	M+H	C15H24O2	-0.0814703	2.18615	0.0390257	0.0833344	-1.33374	0.396737	125726	316900	136763	106871	150341	106830	144591	116649	116584	127181	112111	724001	97181.7	459507	298251	254444	296984	292720
7.30_229.1224m/z	229.122	7.29893	pos	Zederone	HMDB0036767	Sesquiterpenoids	C17085	49.3	49.7	M+H-H2O	C15H18O3	0.317703	2.17544	0.000232994	0.00329127	2.37972	5.20437	149057	28640.7	151035	137365	189466	74065.2	197366	138809	160983	143362	81683.2	4661.37	5666.87	39418	26502.4	21798.6	21134.6	28260.3
9.39_237.1850m/z	237.185	9.38963	pos	Lubiminol	HMDB0029604	Sesquiterpenoids		53.7	73.2	M+H-H2O	C15H26O3	0.218319	1.9649	0.0420861	0.0880875	-1.2562	0.418644	113882	272025	121945	94289.2	132587	109605	129510	99977.6	114798	108340	94537	604503	93763.3	425459	245294	203273	253533	255838
7.49_219.1744m/z	219.174	7.48812	pos	Acorusnol	HMDB0030920	Sesquiterpenoids		54.5	77.4	M+H-H2O	C15H24O2	0.428556	1.8613	0.0104807	0.0324548	-0.563093	0.676849	238916	352983	260033	230601	251102	217987	242787	242202	246571	220047	304317	527993	273188	427528	321913	301760	340839	326325
5.28_312.1213n	357.12	5.27945	neg	similar to Nivalenol	HMDB0004304	Nivalenol-like Sesquiterpenoids	C06080	43.9	26.2	M-H, M+FA-H	C15H20O7	1.20238	1.73853	0.00711718	0.0247707	0.253541	1.19213	689787	578618	712140	529072	655076	752019	766271	720520	718747	664451	596075	591578	459798	644441	594955	643810	526115	572169
11.12_201.1639m/z	201.164	11.1201	pos	(S)-gamma-Calacorene	91585	Sesquiterpenoids		50.2	56.4	M+H	C15H20	0.844786	1.73131	0.00701825	0.0245198	-0.951343	0.517151	110982	214603	125707	87176.2	116043	128964	98955.9	109335	128164	93511.9	188418	263052	166268	397736	160564	189775	197004	154008
9.56_237.1850m/z	237.185	9.55833	pos	Petasitolone	HMDB0038144	Sesquiterpenoids		54.3	76.5	M+H	C15H24O2	0.333868	1.71715	0.0293319	0.0675415	-1.03834	0.486887	107316	220412	93970	92301.3	130670	124016	117052	100571	94385.4	105560	91330.9	446542	96659.1	274345	218279	184439	230321	221378
5.46_194.1672n	177.164	5.45583	pos	Dihydro-alpha-ionone	92801	Sesquiterpenoids		46.4	34.5	M+H-H2O, M+H	C13H22O	0.591112	1.56009	0.000460026	0.00468927	-2.25327	0.209748	17134.4	81690.5	20172.7	14786.7	17715.5	16929.7	15243	14961.1	19866.7	17400	48696	116533	106654	45821.6	93809	88828.3	102516	50666.3
7.76_201.1639m/z	201.164	7.7604	pos	alpha-Corocalene	92937	Sesquiterpenoids		48.5	53.8	M+H	C15H20	0.661923	1.42146	0.00142079	0.00882212	-1.37591	0.385309	35622.5	92451.9	41076.5	34866.5	41328.8	28830.9	34805.8	38705.2	36424	28942.4	77171.1	144413	61129.2	129687	82016.4	78586.8	84288	82324.2
5.85_321.1349m/z	321.135	5.84858	neg	8-Acetyl-T2 tetrol	HMDB0036160	Sesquiterpenoids		46.5	38.3	M-H2O-H	C17H24O7	1.50604	1.40248	0.00604684	0.0221367	-6.2416	0.0132157	839.694	63537.4	1159.08	1475.39	644.888	907.129	561.619	796.201	513.587	659.658	1340.95	150916	13601.2	78871	69367.2	49144.1	66850.1	78209.2
10.86_446.2901m/z	446.29	10.8614	pos	2-Angeloyl-9-(3-methyl-2E-pentenoyl)-2b,9a-dihydroxy-4Z,10(14)-oplopadien-3-one	HMDB0034064	Sesquiterpenoids		44	21.6	M+NH4	C26H36O5	0.0878669	1.37571	0.00244191	0.0122884	0.508788	1.42285	197161	138568	186613	197963	192988	146683	170672	252588	240366	189419	145255	166479	119111	118897	146224	145341	125532	141702
5.46_213.1850m/z	213.185	5.45583	pos	4-(3-Hydroxybutyl)-3,3,5-trimethylcyclohexanone	HMDB0039805	Sesquiterpenoids		50.5	54.5	M+H	C13H24O2	0.247957	1.3283	0.00152836	0.00924949	-1.96223	0.256632	17161	66870	20148.9	15106.2	19133.3	15958.8	16993.2	14970.8	18564.6	16412	22501.7	96797.6	83991	38447.7	82168	78727.2	87411.2	44915.8
6.57_264.1366n	263.129	6.56715	neg	Abscisic acid	HMDB0036093	Sesquiterpenoids		53.7	73.2	M-H, 2M-H, M+FA-H	C15H20O4	1.65684	1.30451	0.00652801	0.0233463	0.527994	1.44192	176125	122146	155527	119529	149677	206194	177650	216762	203198	180460	143986	135400	105032	123670	110759	110337	123352	124629
5.69_194.1672n	177.164	5.68892	pos	Oxidized Latia luciferin	65996	Sesquiterpenoids	C03527	47.7	41.2	M+H-H2O, M+H	C13H22O	0.445534	1.29432	0.000184861	0.00288228	-2.24264	0.211299	11492.9	54391.7	13965.6	9521.67	12316.5	11252.8	10951.4	9558.01	12152.2	12225.1	47849.3	84818.2	59498.1	35976.8	58025.6	59846.3	55498.4	33621.2
13.63_205.1952m/z	205.195	13.6258	pos	alpha-Selinene	91040	Sesquiterpenoids		51.3	66.4	M+H	C15H24	0.647565	1.27291	0.048747	0.0982633	-1.70277	0.307196	30287.3	98592.9	27121.1	22165.6	31000.8	15955	44812.9	31551.7	37542.7	32149	22175.4	276030	31821	98687.5	108515	70297.8	81405.5	99810.5
14.45_203.1795m/z	203.18	14.4466	pos	Preisocalamendiol	HMDB0035391	Sesquiterpenoids		53.4	72.2	M+H-H2O	C15H24O	0.512265	1.23191	0.0386094	0.0826684	0.463473	1.37886	193260	140159	174119	187270	188747	109420	243039	198271	260733	184480	148831	135120	157304	160346	107076	136461	134528	141610
10.49_384.1934n	385.201	10.4857	pos	Armillarivin	93530	Sesquiterpenoids		45.6	35.1	M+H, M+Na	C23H28O5	-0.82639	1.22484	4.83226e-05	0.00147781	2.74845	6.71993	42785.1	6366.89	45582.4	63758.3	48498.4	24732.5	37241.2	40176.5	46591.1	35700.2	9559.65	5954.88	4693.24	7092.02	5221.15	5694.57	6339.18	6380.45
5.16_321.1081m/z	321.108	5.16435	pos	Anguidol	91063	Sesquiterpenoids		37.7	0	M+K	C15H22O5	-6.15558	1.19244	0.0307588	0.0699096	-2.28236	0.205561	14015.9	68183.6	10490.2	12092.9	15417	14562.9	14737.3	15305.3	13455.3	16066.1	196045	18847.9	24059.2	83512.1	50298.9	62645.9	55074	54985.8
9.70_406.1998n	405.192	9.7023	neg	(1R,3R,4R,5S,6S,8x)-1-Acetoxy-8-angeloyloxy-3,4-epoxy-5-hydroxy-7(14),10-bisaboladien-2-one	HMDB0039971	Sesquiterpenoids		50.3	58.3	M-H, 2M-H	C22H30O7	1.48663	1.16083	0.0467511	0.0951902	0.251394	1.19036	343982	288974	275375	377378	337135	389830	279149	408919	320232	363834	293581	349485	354612	277050	275300	256468	229571	275721
8.33_229.1224m/z	229.122	8.33397	pos	Enokipodin B	HMDB0035902	Sesquiterpenoids		48.3	44.6	M+H-H2O	C15H18O3	0.532114	1.12424	0.0342473	0.075625	-0.501326	0.706457	140953	199521	140678	131429	181567	74099.6	183138	137647	150141	128924	65295.6	195448	308319	191412	211071	215164	200226	209232
4.96_194.1672n	177.164	4.96455	pos	7,8-Dehydro-3,4-dihydro-beta-ionol	91333	Sesquiterpenoids		44.5	25.2	M+H-H2O, M+H	C13H22O	0.559977	1.11433	0.00013061	0.00240118	-2.66365	0.15782	5931.96	37586.8	7447.82	5444.7	6119.74	5008.39	5776.67	4884.54	7154.18	5619.65	30165.3	50950.2	49613.7	22488.8	47983.3	39325.6	38704.6	21463.1
5.89_458.1795n	439.162	5.89115	neg	Deoxynivalenol 3-glucoside	HMDB0039852	Sesquiterpenoids		48.2	49.9	M-H2O-H, M-H	C21H30O11	1.43618	1.09225	0.00206727	0.0110746	1.16932	2.24906	62054.5	27591.4	73066.5	63420	86205.5	39368.4	54266.4	51466.1	69540.3	59102.9	58683.7	19594.4	10391.7	29602.8	26737	19645.4	27462.8	28613
10.39_257.1514m/z	257.151	10.3851	pos	Dehydrocurdione	HMDB0035407	Sesquiterpenoids	C16949	40.4	6.2	M+Na	C15H22O2	0.875105	1.08695	6.47877e-05	0.001704	-2.47116	0.180346	6648.63	36866	7823.4	4748.62	9120.01	7608.16	6910.67	6286.56	5200.93	5490.72	45245.5	37599.2	31163.3	57886.6	25760.4	31982.9	35925.9	29363.9
5.18_381.1678m/z	381.168	5.1833	neg	Melleolide	90951	Sesquiterpenoids		37.2	0	M-H2O-H	C23H28O6	-7.34033	1.08031	0.0248743	0.0601136	-1.35085	0.39206	28167.3	71844.4	28113.8	20680	21320.3	53078	19906.7	30913.7	17145.1	34181	171483	38882.3	24339.7	73079.3	71381.9	66205.5	66789	62593.8
11.24_315.1948m/z	315.195	11.2406	pos	6-Angeloylfuranofukinol	HMDB0036146	Sesquiterpenoids		46.7	40.5	M+H-H2O	C20H28O4	-2.04788	1.05453	0.0131811	0.0380938	-0.859907	0.550988	53665.6	97398.8	38637	64119.9	44580.7	86564.3	30600.5	60040.7	54273.5	50507.9	49822.8	187869	82857.5	97559.1	85377.2	80122.1	82284.7	113298
7.03_427.1616m/z	427.162	7.02558	neg	7alpha,8alpha-Dihydroxycalonectrin	HMDB0038916	Sesquiterpenoids		47.7	46.7	M+FA-H	C19H26O8	1.71893	1.04102	0.000327848	0.00393803	-2.37275	0.193077	6849.27	35474.2	3701.01	7184.2	3260.56	15956.1	5419.43	6664.97	4755.89	7851.97	51671	20040.1	45457.8	38531	33363.5	37311.9	18394.7	39023.8
12.80_442.3089n	465.298	12.7988	pos	(3beta,5alpha,9alpha,22E,24R)-5,9-Epidioxy-3-hydroxyergosta-7,22-dien-6-one	88607	Sesquiterpenoids		50.3	58.3	M+H, M+Na	C28H42O4	1.23936	1.0143	0.0139449	0.039635	1.51001	2.84813	62911	22088.6	29371.7	108239	47239.1	146382	16381.8	79342.5	36999.1	39333.5	30110.6	27843.1	10671.4	51723.8	12264.1	14670.6	7434.72	21990.1
6.77_205.1953m/z	205.195	6.76672	pos	α-Humulene	43510	Sesquiterpenoids	C09684	45.6	44.3	M+H	C15H24	0.900259	1.0112	0.00433824	0.0178083	0.72856	1.65698	77234.5	46611.5	85851.6	64717	73741.2	65740.4	112485	57033.4	79960.9	78345.9	31263.9	47238.5	65245.8	39164.5	43924.1	44136.9	56378.6	45539.5
11.36_444.3605n	445.368	11.3613	pos	Messagenin	67084	Triterpenoids	C08618	42.3	19.7	M+H-H2O, M+H	C29H48O3	0.318364	2.96418	0.00089844	0.00685426	1.67527	3.19379	352511	110374	365383	329020	558855	108859	442927	301061	384090	329893	110545	88937.8	122413	107542	108112	109144	121187	115110
15.23_667.3457m/z	667.346	15.2273	neg	3-O-Protocatechuoylceanothic acid	HMDB0029625	Triterpenoids		52	70.8	M+FA-H	C37H50O8	-4.87844	2.80605	0.0320829	0.0721075	2.33863	5.05823	376077	74349.5	429133	110433	393866	62201.2	1.04052e+06	221368	409425	341668	1965.19	85876.2	157319	32219.7	32870.4	136657	104072	43816.5
5.68_1153.5942m/z	1153.59	5.68178	neg	Ginsenoside Rb1	91096	Triterpenoids		37.8	0	M+FA-H	C54H92O23	-6.22821	2.27108	0.00435385	0.0178458	-4.19937	0.0544331	8997.48	165294	14348.8	10769.4	12454.3	7834.05	10753.2	3936.48	6664.57	5219.01	5.24594e-08	150448	268393	97074.4	261117	116362	314691	114268
11.74_458.3762n	459.383	11.7437	pos	Heliantriol C	93445	Triterpenoids		42.7	20.7	M+H-H2O, M+H	C30H50O3	0.46177	2.01289	0.000171174	0.00274781	2.19862	4.59039	134846	29375.7	148687	116973	179596	68261	194932	89117.4	138569	142631	47011.7	4440.7	32359.5	23257.3	29906.3	36181	34897.5	26951.8
13.63_469.2963m/z	469.296	13.6263	neg	17,23-Epoxy-29-hydroxy-27-norlanost-8-ene-3,15,24-trione	HMDB0035113	Triterpenoids		54.9	77.9	M-H	C29H42O5	0.792603	1.8914	0.0089539	0.0290339	0.885868	1.84788	264097	142919	230376	140450	284764	187898	315263	338447	407540	208042	148398	141837	113475	125950	164442	195565	98099	155590
11.06_575.3736m/z	575.374	11.061	pos	Avenestergenin B2	HMDB0035266	Triterpenoids		50.8	59.1	M+H-H2O	C37H52O6	0.787143	1.78148	0.000602087	0.0054045	-5.47993	0.0224067	1963.59	87634	3178.34	5.24594e-08	3005.42	2087.68	3549.25	1759.82	5.24594e-08	2128.17	178077	97731.6	39808.7	91253.4	89880.5	68663.4	55596.1	80061.1
12.05_429.3001m/z	429.3	12.0504	pos	12-Ketoporrigenin	HMDB0031079	Triterpenoids		50.6	59.2	M+H-H2O	C27H42O5	0.430877	1.43131	0.0113818	0.0344019	0.590776	1.50606	368523	244694	308493	368163	288949	877283	176326	318096	346583	264292	246467	239623	177592	531199	184988	204418	188996	184271
8.35_504.3465n	503.339	8.35118	neg	Tomentosic acid	HMDB0034501	Triterpenoids		46.7	38.7	M-H, M+FA-H	C30H48O6	2.75523	1.42847	8.40716e-05	0.00194181	4.22719	18.7288	54923.4	2932.56	79186.5	38506.3	72171.1	29217	67834.7	34331.4	64065.6	54074.2	11295.5	91.7303	272.214	4444	1576.92	2493.64	1024.7	2261.77
5.59_491.2645m/z	491.264	5.592	pos	Lucidenic acid J	90960	Triterpenoids		45.9	35.9	M+H	C27H38O8	1.08458	1.39231	0.00186805	0.0104547	1.52306	2.87399	86810.9	30205.7	79171	129326	66780.2	90115.5	35573.9	134351	97225.7	61943.3	45800.2	38786.6	29855.9	26693.6	29740.6	31589.4	17368.3	21810.7
12.31_863.5020m/z	863.502	12.3077	neg	Quinquenoside F1	HMDB0039398	Triterpenoids		48.8	55.9	M+FA-H	C42H74O15	1.21836	1.29464	0.00130144	0.00842284	-0.613729	0.653505	95350.5	145906	155671	69504.2	82589.6	81434.8	99146.2	77316.6	80584	116557	174124	154538	125699	133048	152169	112104	176427	139140
11.14_441.3730m/z	441.373	11.1412	pos	Soyasapogenol C	71678	Triterpenoids	C17422	48.7	50	M+H	C30H48O2	0.563001	1.18397	3.74142e-05	0.00132273	2.22626	4.6792	43682.8	9335.52	46014.3	41383.9	56985.8	23892.9	51621.8	37476.5	46738.5	45348.5	15081.9	4783.3	8196.68	9897.96	9329.62	10483.6	7463.27	9447.82
8.36_468.3242n	469.332	8.35558	pos	16beta-16-Hydroxy-3-oxo-1,12-oleanadien-28-oic acid	95185	Triterpenoids		52.1	63.9	M+H-H2O, M+H	C30H44O4	0.504982	1.08658	0.000131617	0.00240902	4.87744	29.3938	31514.2	1072.14	48493.6	20023.9	40213.2	17594.3	42404.3	19378.4	34564.4	29441.6	4255.24	5.24594e-08	5.24594e-08	1998.81	510.593	931.001	5.24594e-08	881.45
10.90_530.2858n	553.278	10.9018	pos	Ganoderic acid theta	HMDB0036310	Triterpenoids		39.7	7.18	M+H, M+Na	C30H42O8	-4.09356	1.05771	0.018077	0.0477827	0.493794	1.40814	159426	113217	204388	154777	170840	241261	167974	94555.4	87886.8	153728	110186	88408.4	128478	158249	112371	103488	113799	90759.2
11.47_438.3499n	439.357	11.4658	pos	Ganoderol A	HMDB0035728	Triterpenoids		42.6	37.1	M+H-H2O, M+H	C30H46O2	0.280584	1.00118	0.00119245	0.00796757	-2.89978	0.133992	4598.31	34317.8	4810.77	3467.37	4423.24	8157.75	4544.71	2873.31	4785.65	3723.72	39382.1	36237.1	20335.3	74006.7	25370.6	25518.6	31748.8	21943.1
10.71_631.4002m/z	631.4	10.7062	pos	trans-3-Feruloylcorosolic acid	HMDB0040496	Triterpenoids		44.6	28	M+H-H2O	C40H56O7	1.38987	1.00053	0.0233068	0.0574085	1.20202	2.30062	64805.4	28168.7	42184.4	105977	57392.7	136886	33122	54147	39124.1	49610.5	27484.6	20708.7	47479.4	35689.1	20471.5	21641	18040.1	33835.2
